# Supplementary material
Source: PubMed Central journal article supplement (PMC5032024)
Supplement: NIHMS802613-supplement-app2.pdf [file NIHMS802613-supplement-app2.pdf]

## Supplementary Appendix 2

This appendix has been provided by the authors to give readers additional information about their work.

Supplement to: McGeachie MJ, Yates KP, Zhou X, et al. Patterns of growth and decline in lung function in persistent childhood asthma. *N Engl J Med* 2016;374:1842-52. DOI: 10.1056/NEJMoa1513737

## Supplementary Appendix

This appendix has been provided by the authors to give readers additional information about their work.

Supplement to: McGeachie MJ, Yates KP, Zhou X, et al. Patterns of growth and decline in lung function in persistent childhood asthma. *N Engl J Med* 2016;374:1842-52. DOI: [10.1056/NEJMoa1513737](https://doi.org/10.1056/NEJMoa1513737)

# Patterns of Lung Function Growth and Decline in Persistent Childhood Asthma Appendix 2B. Pattern coding sheets for the 1041 CAMP participants

09/08/2015

Page 1 of 1041

Pre-BD FEV1 Data and Percentiles: 1004

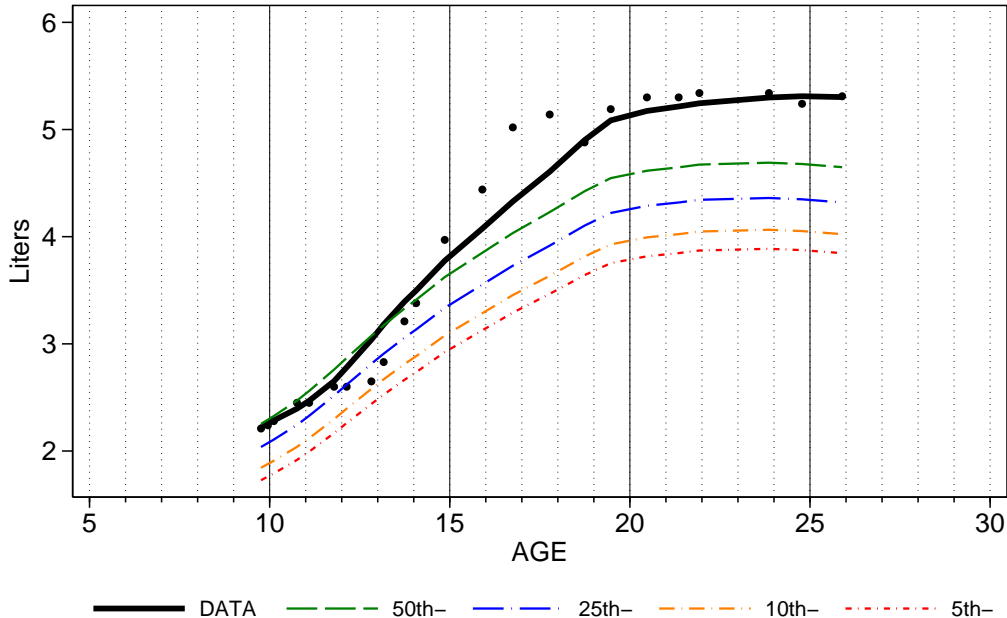

1004

PATTERN OF GROWTH/DECLINE (Check One)

- ( 1) Normal Growth
- ( 2) Normal Growth, Early Decline
- ( 3) Reduced Growth
- ( 4) Reduced Growth, Early Decline
- ( 9) Undetermined Pattern
- ( 8) Undetermined - not enough data

Maximum lung growth attained: ( 1) Yes ( 0) No

Plateau started: ( 2) No plateau ( 1) Yes ( 0) No

Decline started: ( 1) Yes ( 0) No

AGE AT each of the following periods (use '99' if N/A):

Maximum Lung Growth: \_\_\_\_ . \_\_\_\_

Start of Plateau: \_\_\_\_ . \_\_\_\_

Start of Decline: \_\_\_\_ . \_\_\_\_

### Pre-BD FEV1 Data and Percentiles: 1010

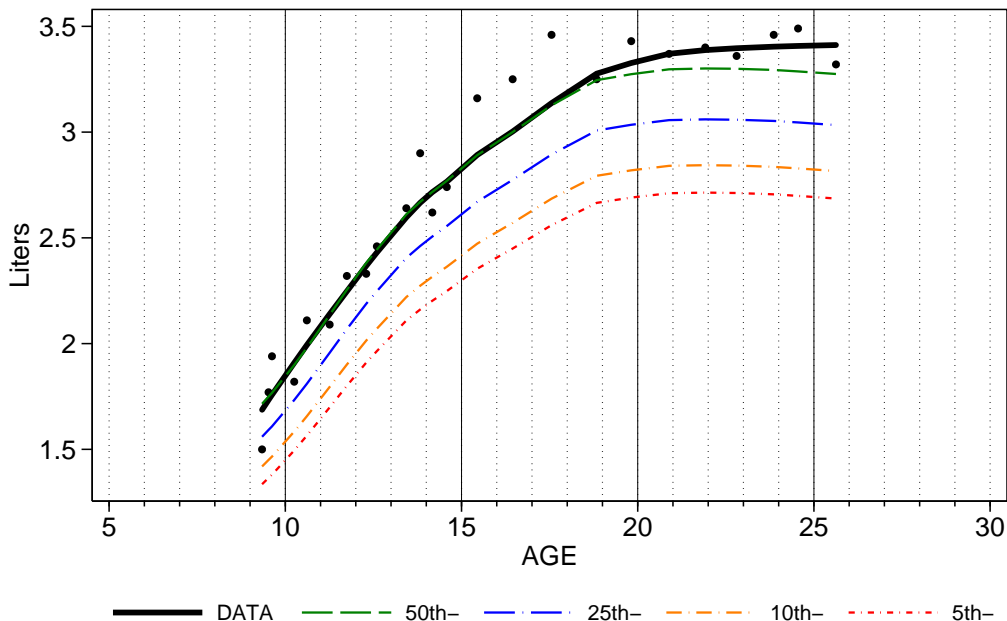

1010

**PATTERN OF GROWTH/DECLINE (Check One)**

- ( 1) Normal Growth
- ( 2) Normal Growth, Early Decline
- ( 3) Reduced Growth
- ( 4) Reduced Growth, Early Decline
- ( 9) Undetermined Pattern
- ( 8) Undetermined - not enough data

Maximum lung growth attained: ( 1) Yes ( 0) No

Plateau started: ( 2) No plateau ( 1) Yes ( 0) No

Decline started: ( 1) Yes ( 0) No

AGE AT each of the following periods (use '99' if N/A):

Maximum Lung Growth: \_\_\_\_ . \_\_\_\_

Start of Plateau: \_\_\_\_ . \_\_\_\_

Start of Decline: \_\_\_\_ . \_\_\_\_

### Pre-BD FEV1 Data and Percentiles: 1013

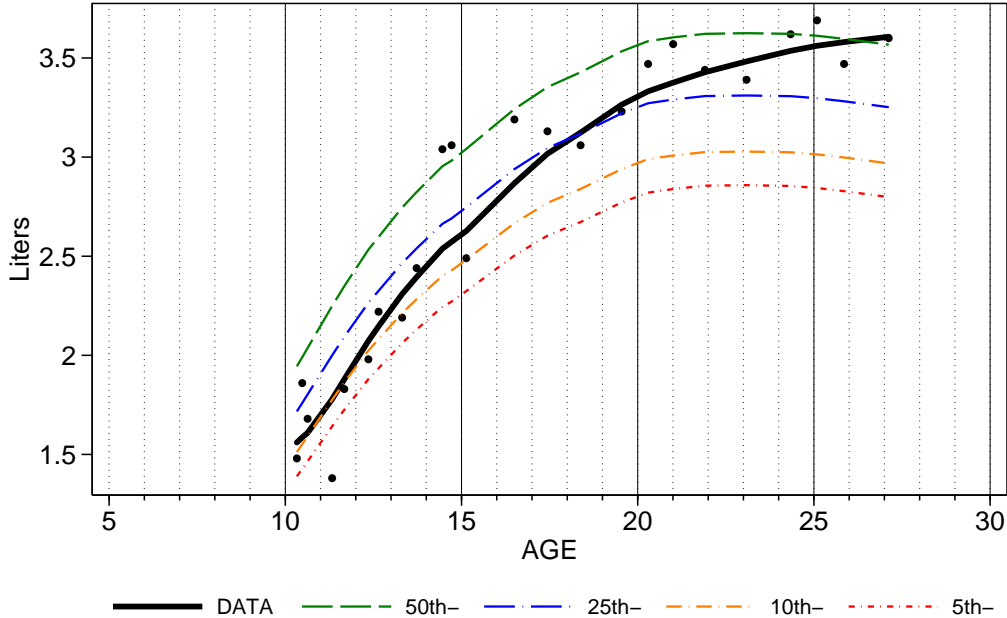

1013

**PATTERN OF GROWTH/DECLINE (Check One)**

- ( 1 ) Normal Growth
- ( 2 ) Normal Growth, Early Decline
- ( 3 ) Reduced Growth
- ( 4 ) Reduced Growth, Early Decline
- ( 9 ) Undetermined Pattern
- ( 8 ) Undetermined - not enough data

Maximum lung growth attained: ( 1 ) Yes ( 0 ) No

Plateau started: ( 2 ) No plateau ( 1 ) Yes ( 0 ) No

Decline started: ( 1 ) Yes ( 0 ) No

AGE AT each of the following periods (use '99' if N/A):

Maximum Lung Growth: \_\_\_\_ . \_\_\_\_

Start of Plateau: \_\_\_\_ . \_\_\_\_

Start of Decline: \_\_\_\_ . \_\_\_\_

### Pre-BD FEV1 Data and Percentiles: 1016

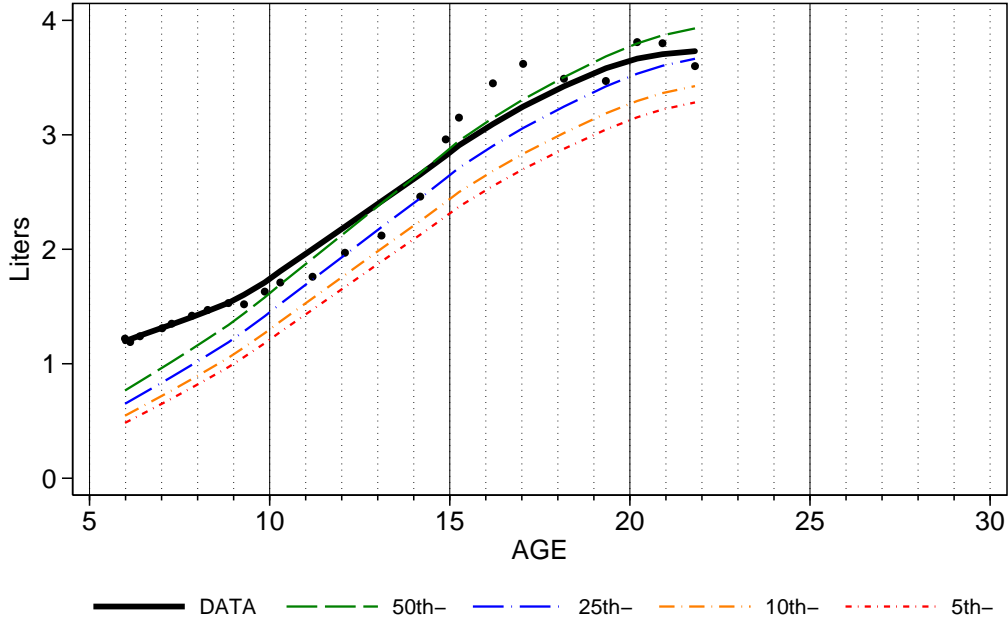

1016

**PATTERN OF GROWTH/DECLINE (Check One)**

- ( 1) Normal Growth
- ( 2) Normal Growth, Early Decline
- ( 3) Reduced Growth
- ( 4) Reduced Growth, Early Decline
- ( 9) Undetermined Pattern
- ( 8) Undetermined - not enough data

Maximum lung growth attained: ( 1) Yes ( 0) No

Plateau started: ( 2) No plateau ( 1) Yes ( 0) No

Decline started: ( 1) Yes ( 0) No

AGE AT each of the following periods (use '99' if N/A):

Maximum Lung Growth: \_\_\_\_ . \_\_\_\_

Start of Plateau: \_\_\_\_ . \_\_\_\_

Start of Decline: \_\_\_\_ . \_\_\_\_

### Pre-BD FEV1 Data and Percentiles: 1017

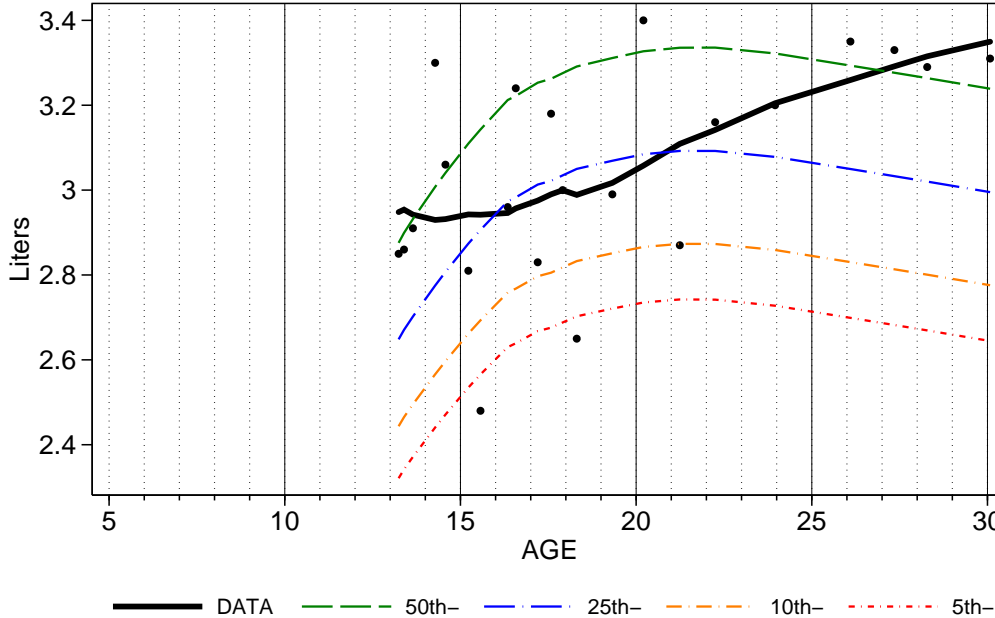

1017

**PATTERN OF GROWTH/DECLINE (Check One)**

- ( 1) Normal Growth
- ( 2) Normal Growth, Early Decline
- ( 3) Reduced Growth
- ( 4) Reduced Growth, Early Decline
- ( 9) Undetermined Pattern
- ( 8) Undetermined - not enough data

Maximum lung growth attained: ( 1) Yes ( 0) No

Plateau started: ( 2) No plateau ( 1) Yes ( 0) No

Decline started: ( 1) Yes ( 0) No

AGE AT each of the following periods (use '99' if N/A):

Maximum Lung Growth: \_\_\_\_ . \_\_\_\_

Start of Plateau: \_\_\_\_ . \_\_\_\_

Start of Decline: \_\_\_\_ . \_\_\_\_

### Pre-BD FEV1 Data and Percentiles: 1018

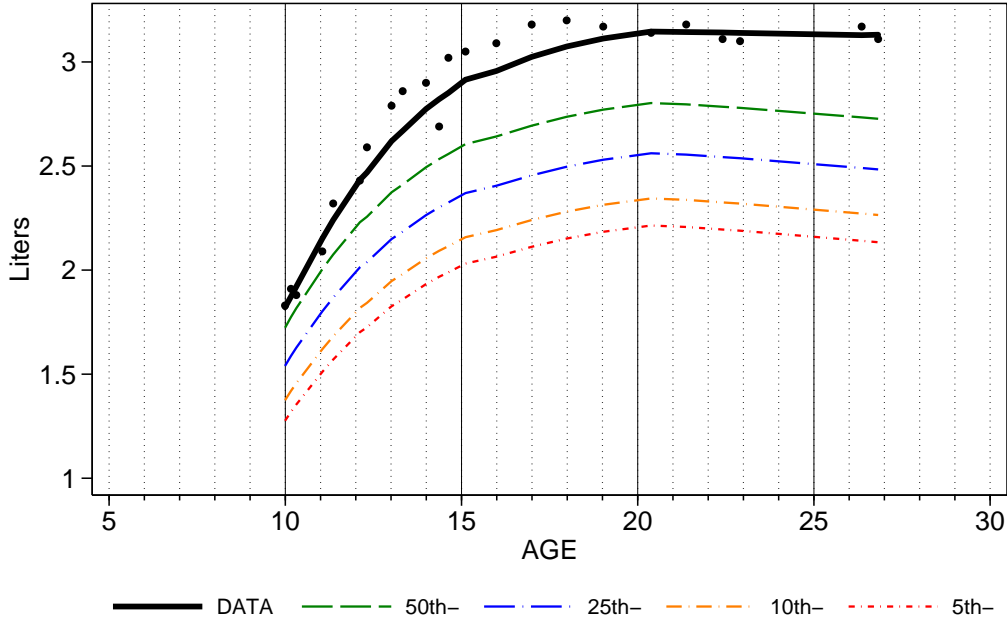

1018

**PATTERN OF GROWTH/DECLINE (Check One)**

- ( 1 ) Normal Growth
- ( 2 ) Normal Growth, Early Decline
- ( 3 ) Reduced Growth
- ( 4 ) Reduced Growth, Early Decline
- ( 9 ) Undetermined Pattern
- ( 8 ) Undetermined - not enough data

Maximum lung growth attained: ( 1 ) Yes ( 0 ) No

Plateau started: ( 2 ) No plateau ( 1 ) Yes ( 0 ) No

Decline started: ( 1 ) Yes ( 0 ) No

AGE AT each of the following periods (use '99' if N/A):

Maximum Lung Growth: \_\_\_\_ . \_\_\_\_

Start of Plateau: \_\_\_\_ . \_\_\_\_

Start of Decline: \_\_\_\_ . \_\_\_\_



### Pre-BD FEV1 Data and Percentiles: 1019

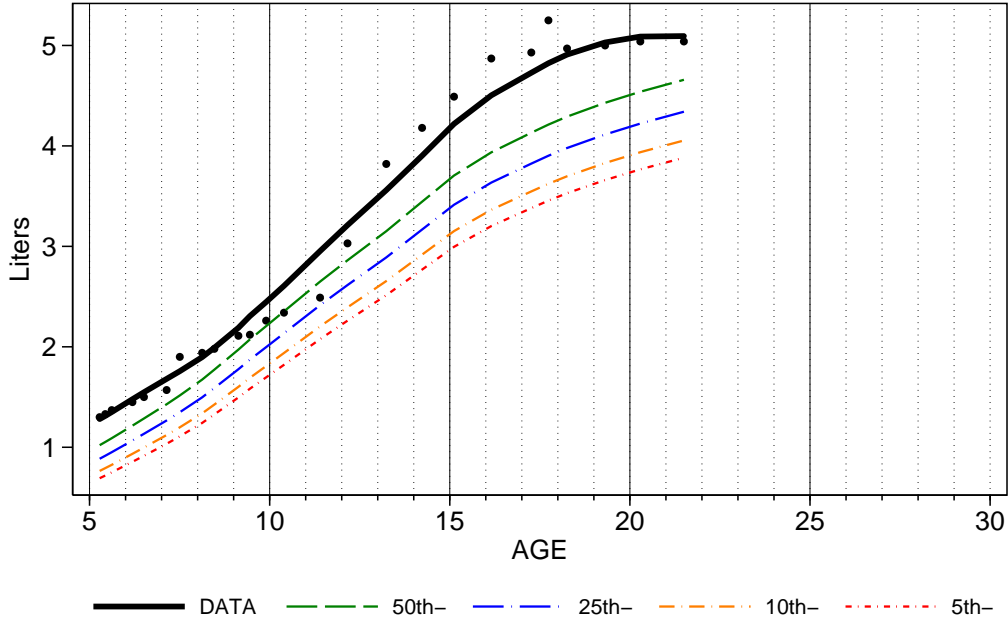

1019

**PATTERN OF GROWTH/DECLINE (Check One)**

- ( 1 ) Normal Growth
- ( 2 ) Normal Growth, Early Decline
- ( 3 ) Reduced Growth
- ( 4 ) Reduced Growth, Early Decline
- ( 9 ) Undetermined Pattern
- ( 8 ) Undetermined - not enough data

Maximum lung growth attained: ( 1 ) Yes ( 0 ) No

Plateau started: ( 2 ) No plateau ( 1 ) Yes ( 0 ) No

Decline started: ( 1 ) Yes ( 0 ) No

AGE AT each of the following periods (use '99' if N/A):

Maximum Lung Growth: \_\_\_\_ . \_\_\_\_

Start of Plateau: \_\_\_\_ . \_\_\_\_

Start of Decline: \_\_\_\_ . \_\_\_\_

### Pre-BD FEV1 Data and Percentiles: 1032

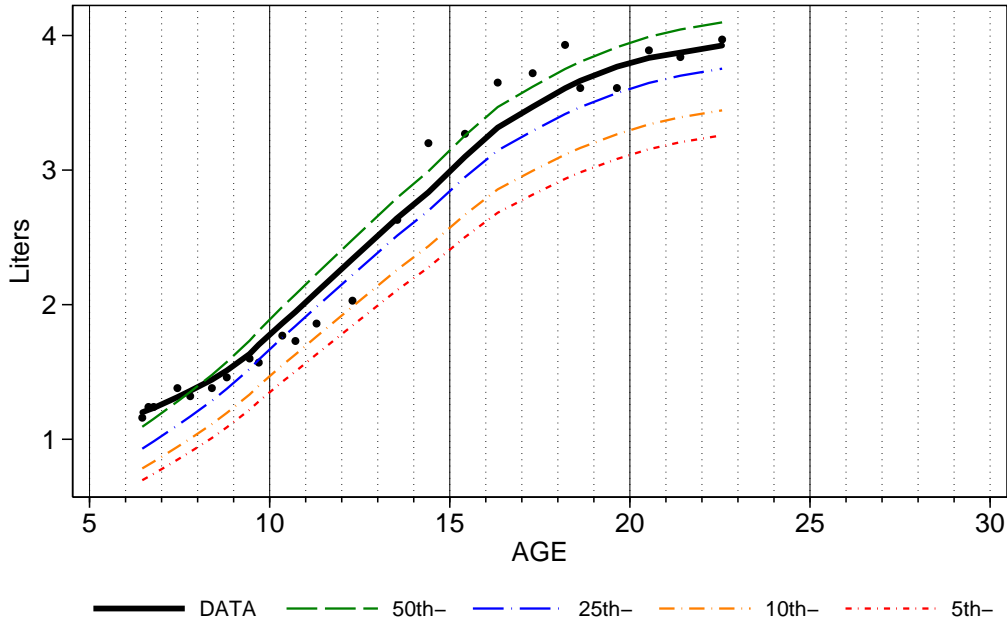

1032

**PATTERN OF GROWTH/DECLINE (Check One)**

- ( 1) Normal Growth
- ( 2) Normal Growth, Early Decline
- ( 3) Reduced Growth
- ( 4) Reduced Growth, Early Decline
- ( 9) Undetermined Pattern
- ( 8) Undetermined - not enough data

Maximum lung growth attained: ( 1) Yes ( 0) No

Plateau started: ( 2) No plateau ( 1) Yes ( 0) No

Decline started: ( 1) Yes ( 0) No

AGE AT each of the following periods (use '99' if N/A):

Maximum Lung Growth: \_\_\_\_ . \_\_\_\_

Start of Plateau: \_\_\_\_ . \_\_\_\_

Start of Decline: \_\_\_\_ . \_\_\_\_

### Pre-BD FEV1 Data and Percentiles: 1035

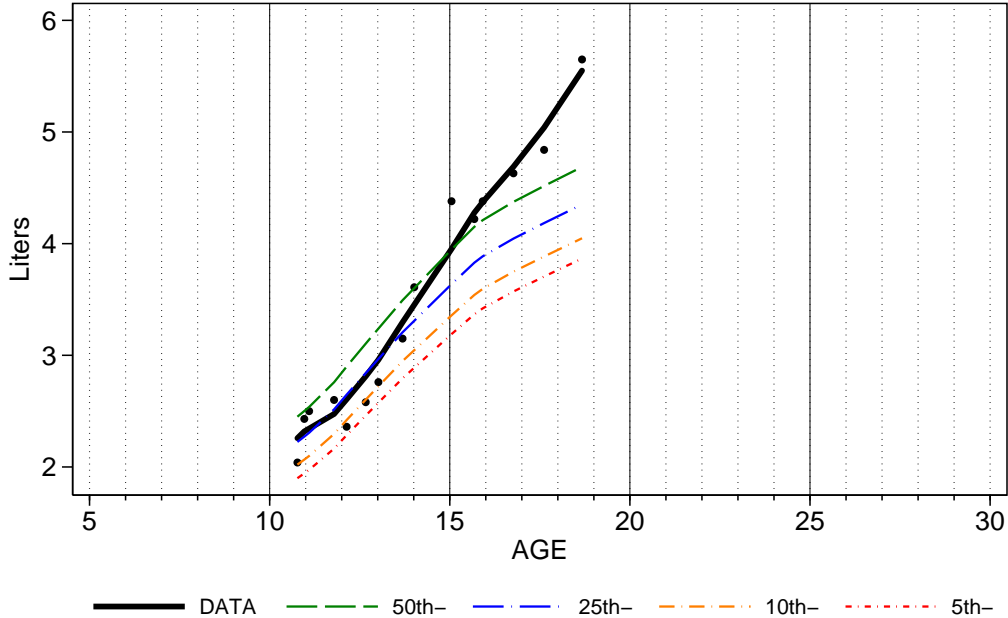

1035

**PATTERN OF GROWTH/DECLINE (Check One)**

- ( 1 ) Normal Growth
- ( 2 ) Normal Growth, Early Decline
- ( 3 ) Reduced Growth
- ( 4 ) Reduced Growth, Early Decline
- ( 9 ) Undetermined Pattern
- ( 8 ) Undetermined - not enough data

Maximum lung growth attained: ( 1 ) Yes ( 0 ) No

Plateau started: ( 2 ) No plateau ( 1 ) Yes ( 0 ) No

Decline started: ( 1 ) Yes ( 0 ) No

AGE AT each of the following periods (use '99' if N/A):

Maximum Lung Growth: \_\_\_\_ . \_\_\_\_

Start of Plateau: \_\_\_\_ . \_\_\_\_

Start of Decline: \_\_\_\_ . \_\_\_\_

### Pre-BD FEV1 Data and Percentiles: 1036

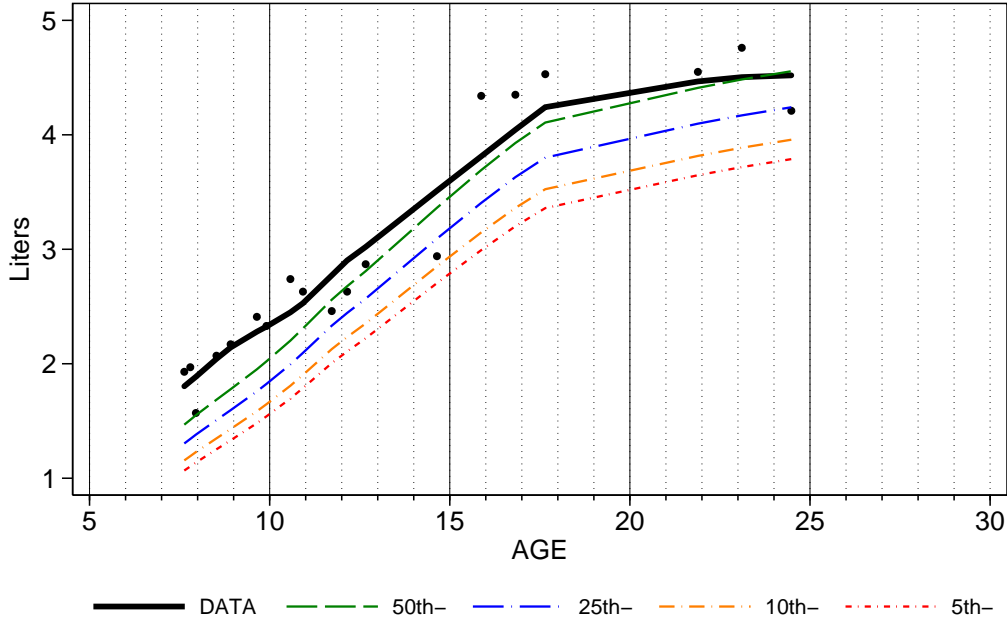

1036

**PATTERN OF GROWTH/DECLINE (Check One)**

- ( 1) Normal Growth
- ( 2) Normal Growth, Early Decline
- ( 3) Reduced Growth
- ( 4) Reduced Growth, Early Decline
- ( 9) Undetermined Pattern
- ( 8) Undetermined - not enough data

Maximum lung growth attained: ( 1) Yes ( 0) No

Plateau started: ( 2) No plateau ( 1) Yes ( 0) No

Decline started: ( 1) Yes ( 0) No

AGE AT each of the following periods (use '99' if N/A):

Maximum Lung Growth: \_\_\_\_ . \_\_\_\_

Start of Plateau: \_\_\_\_ . \_\_\_\_

Start of Decline: \_\_\_\_ . \_\_\_\_

### Pre-BD FEV1 Data and Percentiles: 1037

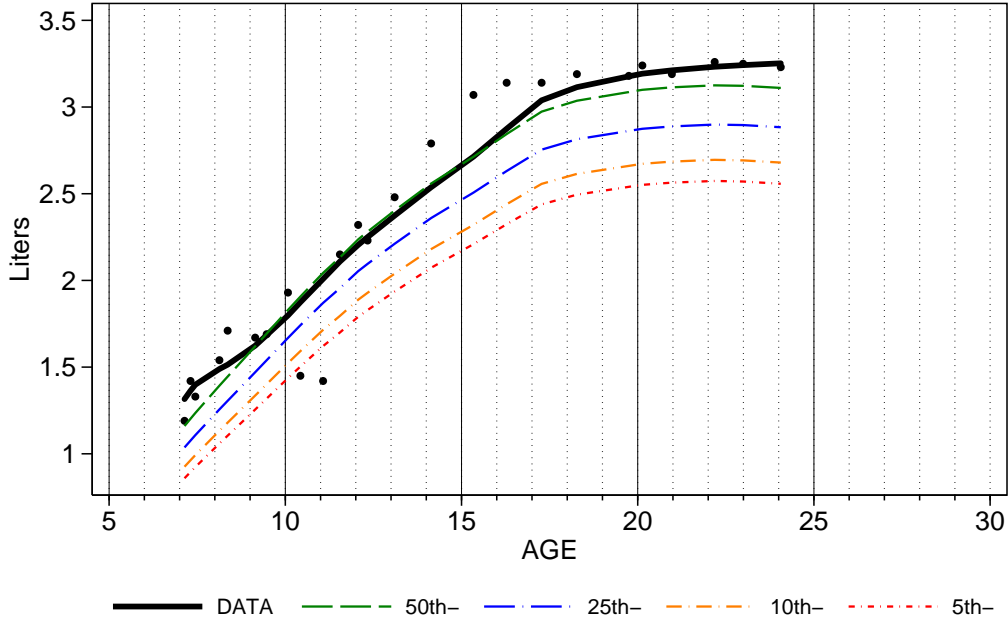

1037

**PATTERN OF GROWTH/DECLINE (Check One)**

- ( 1 ) Normal Growth
- ( 2 ) Normal Growth, Early Decline
- ( 3 ) Reduced Growth
- ( 4 ) Reduced Growth, Early Decline
- ( 9 ) Undetermined Pattern
- ( 8 ) Undetermined - not enough data

Maximum lung growth attained: ( 1 ) Yes ( 0 ) No

Plateau started: ( 2 ) No plateau ( 1 ) Yes ( 0 ) No

Decline started: ( 1 ) Yes ( 0 ) No

AGE AT each of the following periods (use '99' if N/A):

Maximum Lung Growth: \_\_\_\_ . \_\_\_\_

Start of Plateau: \_\_\_\_ . \_\_\_\_

Start of Decline: \_\_\_\_ . \_\_\_\_

### Pre-BD FEV1 Data and Percentiles: 1044

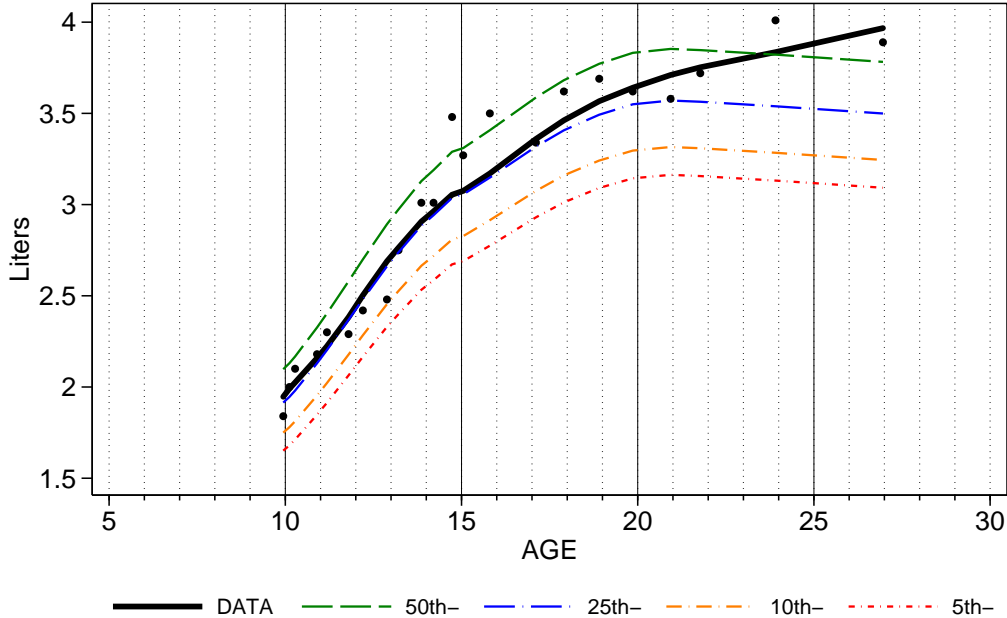

1044

**PATTERN OF GROWTH/DECLINE (Check One)**

- ( 1 ) Normal Growth
- ( 2 ) Normal Growth, Early Decline
- ( 3 ) Reduced Growth
- ( 4 ) Reduced Growth, Early Decline
- ( 9 ) Undetermined Pattern
- ( 8 ) Undetermined - not enough data

Maximum lung growth attained: ( 1 ) Yes ( 0 ) No

Plateau started: ( 2 ) No plateau ( 1 ) Yes ( 0 ) No

Decline started: ( 1 ) Yes ( 0 ) No

AGE AT each of the following periods (use '99' if N/A):

Maximum Lung Growth: \_\_\_\_ . \_\_\_\_

Start of Plateau: \_\_\_\_ . \_\_\_\_

Start of Decline: \_\_\_\_ . \_\_\_\_

### Pre-BD FEV1 Data and Percentiles: 1048

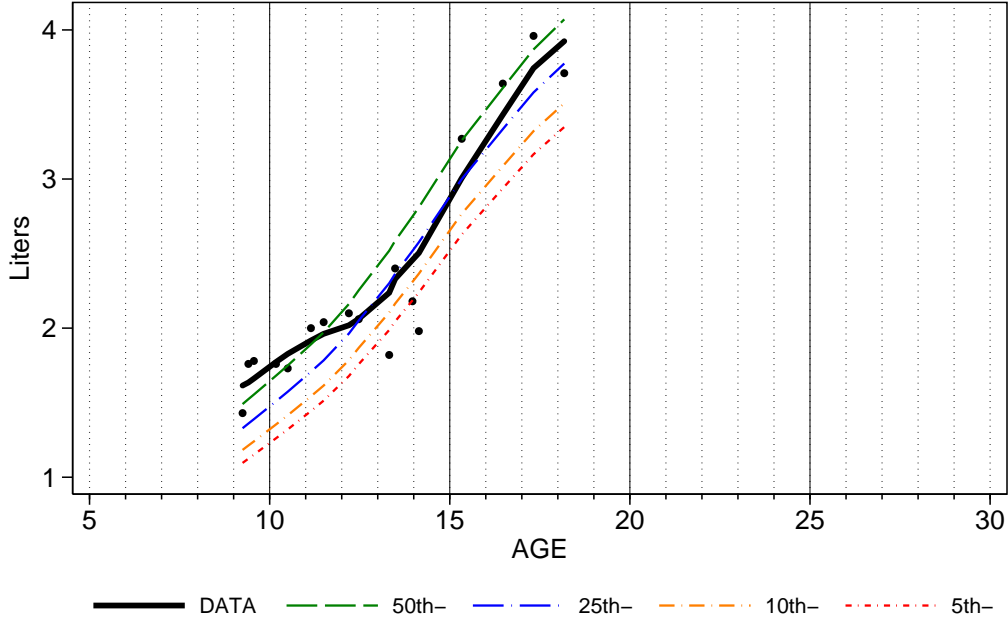

1048

**PATTERN OF GROWTH/DECLINE (Check One)**

- ( 1) Normal Growth
- ( 2) Normal Growth, Early Decline
- ( 3) Reduced Growth
- ( 4) Reduced Growth, Early Decline
- ( 9) Undetermined Pattern
- ( 8) Undetermined - not enough data

Maximum lung growth attained: ( 1) Yes ( 0) No

Plateau started: ( 2) No plateau ( 1) Yes ( 0) No

Decline started: ( 1) Yes ( 0) No

AGE AT each of the following periods (use '99' if N/A):

Maximum Lung Growth: \_\_\_\_ . \_\_\_\_

Start of Plateau: \_\_\_\_ . \_\_\_\_

Start of Decline: \_\_\_\_ . \_\_\_\_

### Pre-BD FEV1 Data and Percentiles: 1049

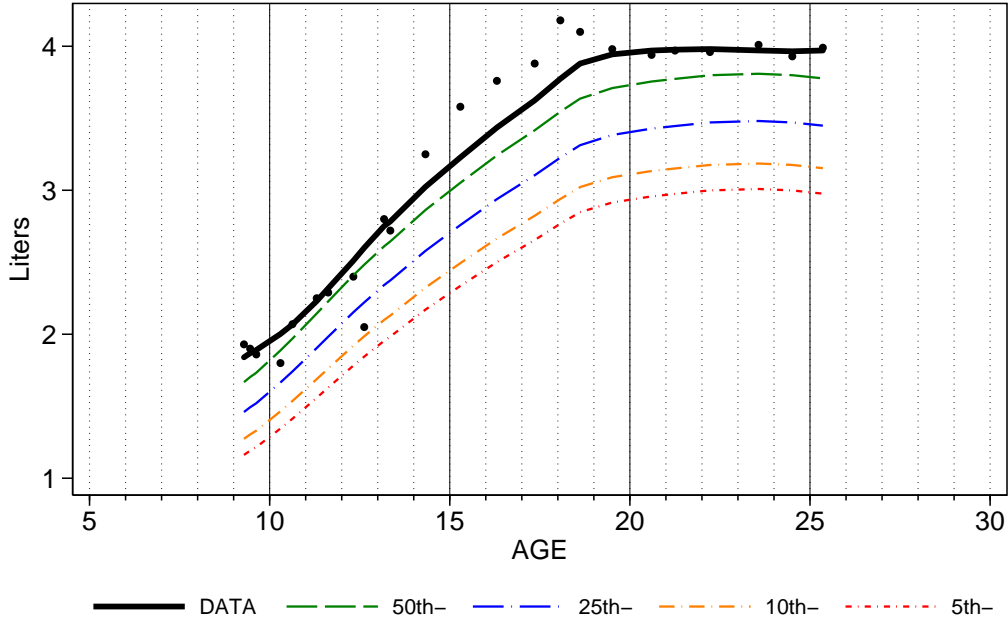

1049

**PATTERN OF GROWTH/DECLINE (Check One)**

- ( 1 ) Normal Growth
- ( 2 ) Normal Growth, Early Decline
- ( 3 ) Reduced Growth
- ( 4 ) Reduced Growth, Early Decline
- ( 9 ) Undetermined Pattern
- ( 8 ) Undetermined - not enough data

Maximum lung growth attained: ( 1 ) Yes ( 0 ) No

Plateau started: ( 2 ) No plateau ( 1 ) Yes ( 0 ) No

Decline started: ( 1 ) Yes ( 0 ) No

AGE AT each of the following periods (use '99' if N/A):

Maximum Lung Growth: \_\_\_\_ . \_\_\_\_

Start of Plateau: \_\_\_\_ . \_\_\_\_

Start of Decline: \_\_\_\_ . \_\_\_\_



### Pre-BD FEV1 Data and Percentiles: 1057

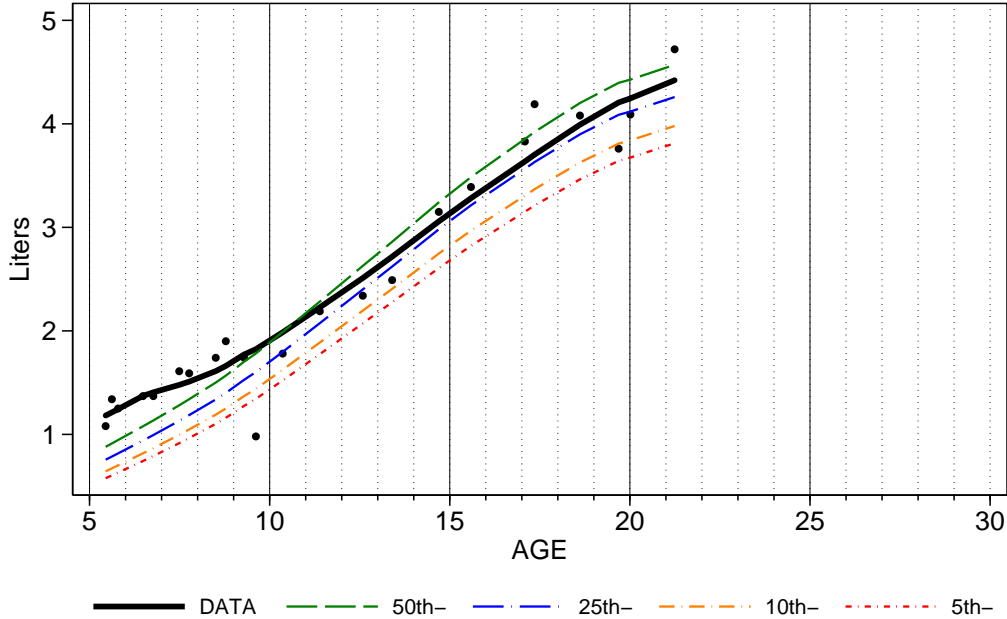

1057

**PATTERN OF GROWTH/DECLINE (Check One)**

- ( 1) Normal Growth
- ( 2) Normal Growth, Early Decline
- ( 3) Reduced Growth
- ( 4) Reduced Growth, Early Decline
- ( 9) Undetermined Pattern
- ( 8) Undetermined - not enough data

Maximum lung growth attained: ( 1) Yes ( 0) No

Plateau started: ( 2) No plateau ( 1) Yes ( 0) No

Decline started: ( 1) Yes ( 0) No

AGE AT each of the following periods (use '99' if N/A):

Maximum Lung Growth: \_\_\_\_ . \_\_\_\_

Start of Plateau: \_\_\_\_ . \_\_\_\_

Start of Decline: \_\_\_\_ . \_\_\_\_

### Pre-BD FEV1 Data and Percentiles: 1058

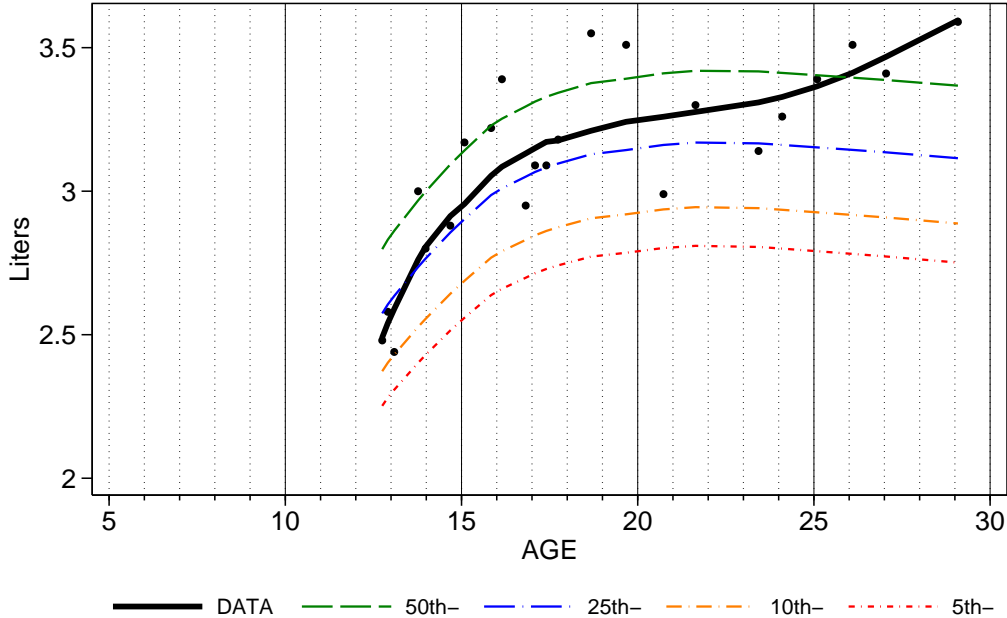

1058

**PATTERN OF GROWTH/DECLINE (Check One)**

- ( 1 ) Normal Growth
- ( 2 ) Normal Growth, Early Decline
- ( 3 ) Reduced Growth
- ( 4 ) Reduced Growth, Early Decline
- ( 9 ) Undetermined Pattern
- ( 8 ) Undetermined - not enough data

Maximum lung growth attained: ( 1 ) Yes ( 0 ) No

Plateau started: ( 2 ) No plateau ( 1 ) Yes ( 0 ) No

Decline started: ( 1 ) Yes ( 0 ) No

AGE AT each of the following periods (use '99' if N/A):

Maximum Lung Growth: \_\_\_\_ . \_\_\_\_

Start of Plateau: \_\_\_\_ . \_\_\_\_

Start of Decline: \_\_\_\_ . \_\_\_\_

### Pre-BD FEV1 Data and Percentiles: 1059

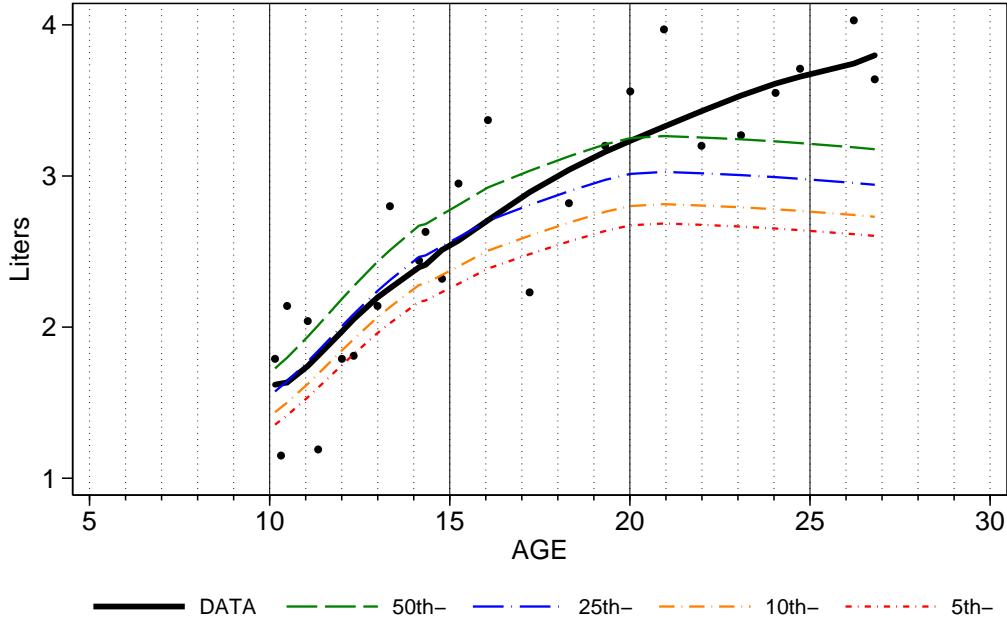

1059

**PATTERN OF GROWTH/DECLINE (Check One)**

- ( 1 ) Normal Growth
- ( 2 ) Normal Growth, Early Decline
- ( 3 ) Reduced Growth
- ( 4 ) Reduced Growth, Early Decline
- ( 9 ) Undetermined Pattern
- ( 8 ) Undetermined - not enough data

Maximum lung growth attained: ( 1 ) Yes ( 0 ) No

Plateau started: ( 2 ) No plateau ( 1 ) Yes ( 0 ) No

Decline started: ( 1 ) Yes ( 0 ) No

AGE AT each of the following periods (use '99' if N/A):

Maximum Lung Growth: \_\_\_\_ . \_\_\_\_

Start of Plateau: \_\_\_\_ . \_\_\_\_

Start of Decline: \_\_\_\_ . \_\_\_\_

### Pre-BD FEV1 Data and Percentiles: 1060

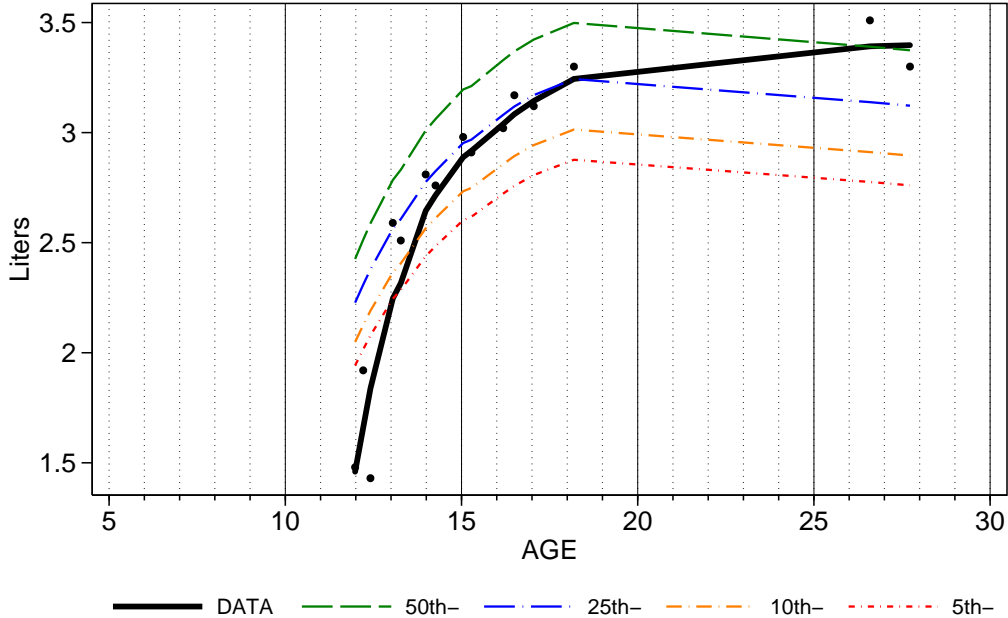

1060

**PATTERN OF GROWTH/DECLINE (Check One)**

- ( 1 ) Normal Growth
- ( 2 ) Normal Growth, Early Decline
- ( 3 ) Reduced Growth
- ( 4 ) Reduced Growth, Early Decline
- ( 9 ) Undetermined Pattern
- ( 8 ) Undetermined - not enough data

Maximum lung growth attained: ( 1 ) Yes ( 0 ) No

Plateau started: ( 2 ) No plateau ( 1 ) Yes ( 0 ) No

Decline started: ( 1 ) Yes ( 0 ) No

AGE AT each of the following periods (use '99' if N/A):

Maximum Lung Growth: \_\_\_\_ . \_\_\_\_

Start of Plateau: \_\_\_\_ . \_\_\_\_

Start of Decline: \_\_\_\_ . \_\_\_\_

### Pre-BD FEV1 Data and Percentiles: 1067

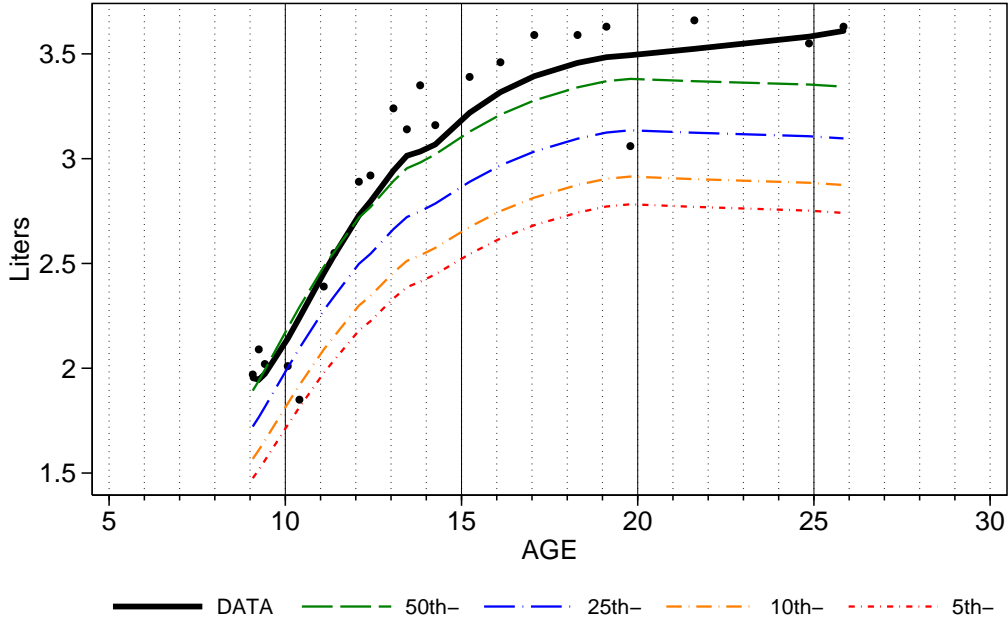

1067

**PATTERN OF GROWTH/DECLINE (Check One)**

- ( 1) Normal Growth
- ( 2) Normal Growth, Early Decline
- ( 3) Reduced Growth
- ( 4) Reduced Growth, Early Decline
- ( 9) Undetermined Pattern
- ( 8) Undetermined - not enough data

Maximum lung growth attained: ( 1) Yes ( 0) No

Plateau started: ( 2) No plateau ( 1) Yes ( 0) No

Decline started: ( 1) Yes ( 0) No

AGE AT each of the following periods (use '99' if N/A):

Maximum Lung Growth: \_\_\_\_ . \_\_\_\_

Start of Plateau: \_\_\_\_ . \_\_\_\_

Start of Decline: \_\_\_\_ . \_\_\_\_

### Pre-BD FEV1 Data and Percentiles: 1069

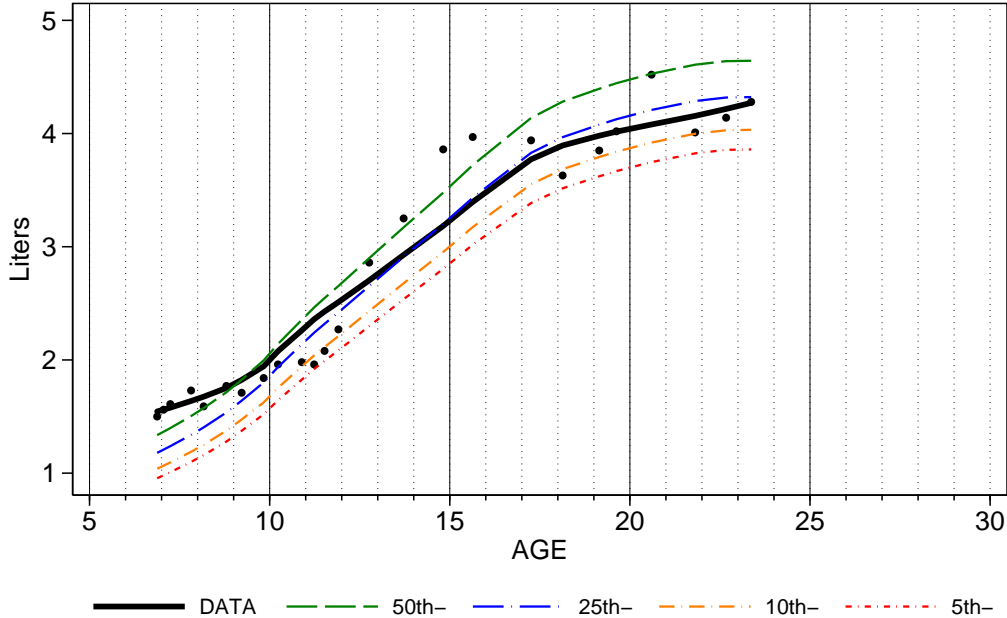

1069

**PATTERN OF GROWTH/DECLINE (Check One)**

- ( 1 ) Normal Growth
- ( 2 ) Normal Growth, Early Decline
- ( 3 ) Reduced Growth
- ( 4 ) Reduced Growth, Early Decline
- ( 9 ) Undetermined Pattern
- ( 8 ) Undetermined - not enough data

Maximum lung growth attained: ( 1 ) Yes ( 0 ) No

Plateau started: ( 2 ) No plateau ( 1 ) Yes ( 0 ) No

Decline started: ( 1 ) Yes ( 0 ) No

AGE AT each of the following periods (use '99' if N/A):

Maximum Lung Growth: \_\_\_\_ . \_\_\_\_

Start of Plateau: \_\_\_\_ . \_\_\_\_

Start of Decline: \_\_\_\_ . \_\_\_\_

### Pre-BD FEV1 Data and Percentiles: 1070

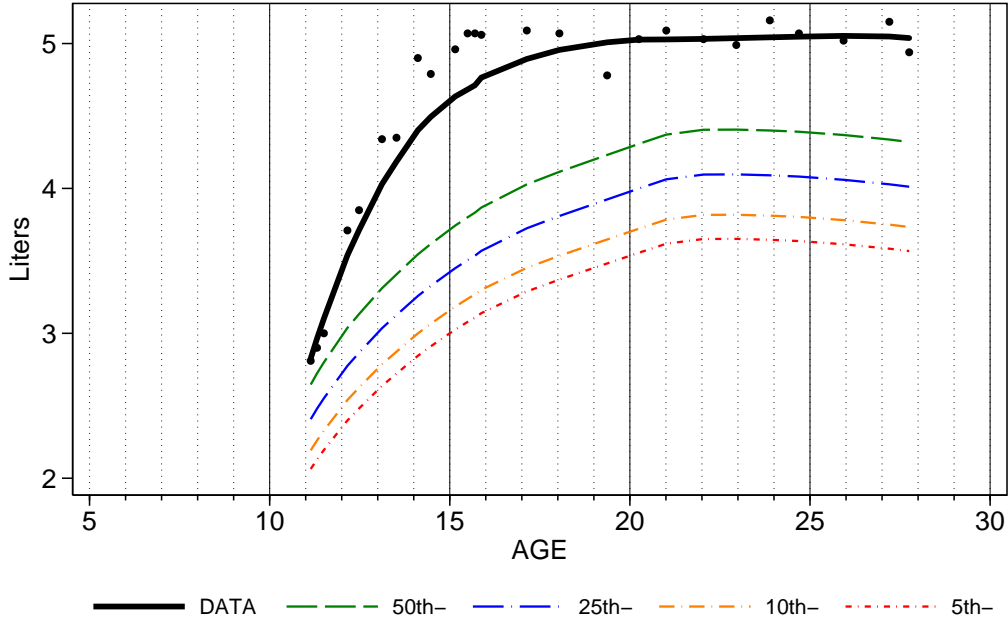

1070

**PATTERN OF GROWTH/DECLINE (Check One)**

- ( 1) Normal Growth
- ( 2) Normal Growth, Early Decline
- ( 3) Reduced Growth
- ( 4) Reduced Growth, Early Decline
- ( 9) Undetermined Pattern
- ( 8) Undetermined - not enough data

Maximum lung growth attained: ( 1) Yes ( 0) No

Plateau started: ( 2) No plateau ( 1) Yes ( 0) No

Decline started: ( 1) Yes ( 0) No

AGE AT each of the following periods (use '99' if N/A):

Maximum Lung Growth: \_\_\_\_ . \_\_\_\_

Start of Plateau: \_\_\_\_ . \_\_\_\_

Start of Decline: \_\_\_\_ . \_\_\_\_

### Pre-BD FEV1 Data and Percentiles: 1071

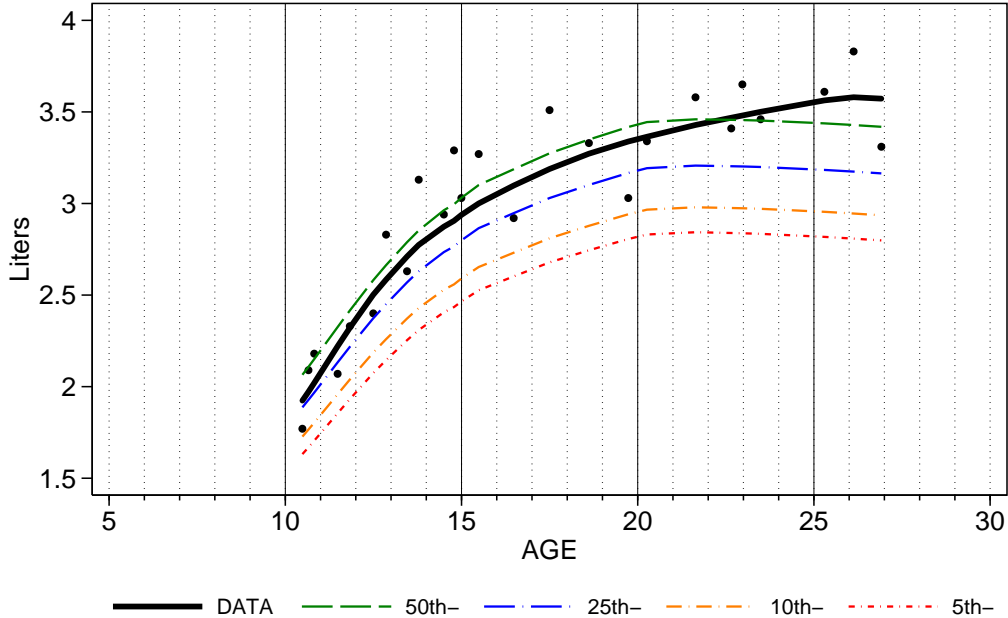

1071

**PATTERN OF GROWTH/DECLINE (Check One)**

- ( 1) Normal Growth
- ( 2) Normal Growth, Early Decline
- ( 3) Reduced Growth
- ( 4) Reduced Growth, Early Decline
- ( 9) Undetermined Pattern
- ( 8) Undetermined - not enough data

Maximum lung growth attained: ( 1) Yes ( 0) No

Plateau started: ( 2) No plateau ( 1) Yes ( 0) No

Decline started: ( 1) Yes ( 0) No

AGE AT each of the following periods (use '99' if N/A):

Maximum Lung Growth: \_\_\_\_ . \_\_\_\_

Start of Plateau: \_\_\_\_ . \_\_\_\_

Start of Decline: \_\_\_\_ . \_\_\_\_



### Pre-BD FEV1 Data and Percentiles: 1074

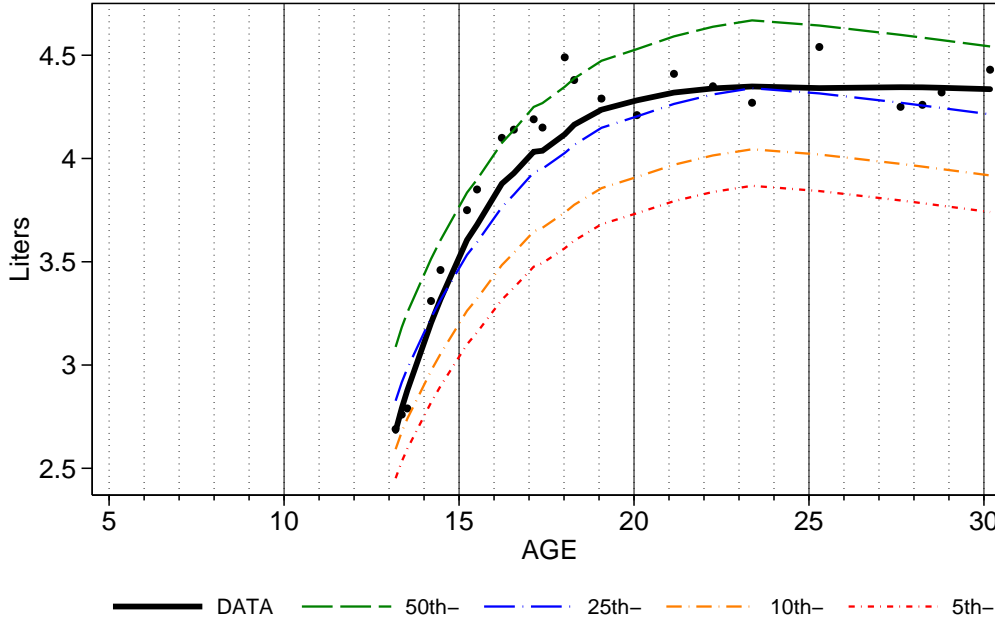

1074

**PATTERN OF GROWTH/DECLINE (Check One)**

- ( 1 ) Normal Growth
- ( 2 ) Normal Growth, Early Decline
- ( 3 ) Reduced Growth
- ( 4 ) Reduced Growth, Early Decline
- ( 9 ) Undetermined Pattern
- ( 8 ) Undetermined - not enough data

Maximum lung growth attained: ( 1 ) Yes ( 0 ) No

Plateau started: ( 2 ) No plateau ( 1 ) Yes ( 0 ) No

Decline started: ( 1 ) Yes ( 0 ) No

AGE AT each of the following periods (use '99' if N/A):

Maximum Lung Growth: \_\_\_\_ . \_\_\_\_

Start of Plateau: \_\_\_\_ . \_\_\_\_

Start of Decline: \_\_\_\_ . \_\_\_\_

### Pre-BD FEV1 Data and Percentiles: 1075

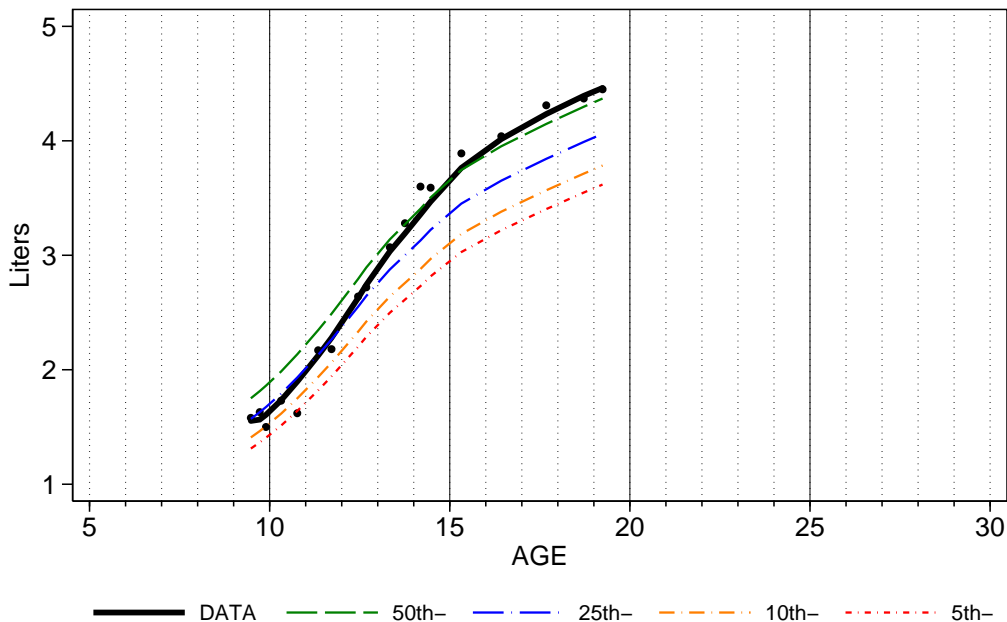

1075

**PATTERN OF GROWTH/DECLINE (Check One)**

- ( 1 ) Normal Growth
- ( 2 ) Normal Growth, Early Decline
- ( 3 ) Reduced Growth
- ( 4 ) Reduced Growth, Early Decline
- ( 9 ) Undetermined Pattern
- ( 8 ) Undetermined - not enough data

Maximum lung growth attained: ( 1 ) Yes ( 0 ) No

Plateau started: ( 2 ) No plateau ( 1 ) Yes ( 0 ) No

Decline started: ( 1 ) Yes ( 0 ) No

AGE AT each of the following periods (use '99' if N/A):

Maximum Lung Growth: \_\_\_\_ . \_\_\_\_

Start of Plateau: \_\_\_\_ . \_\_\_\_

Start of Decline: \_\_\_\_ . \_\_\_\_

### Pre-BD FEV1 Data and Percentiles: 1081

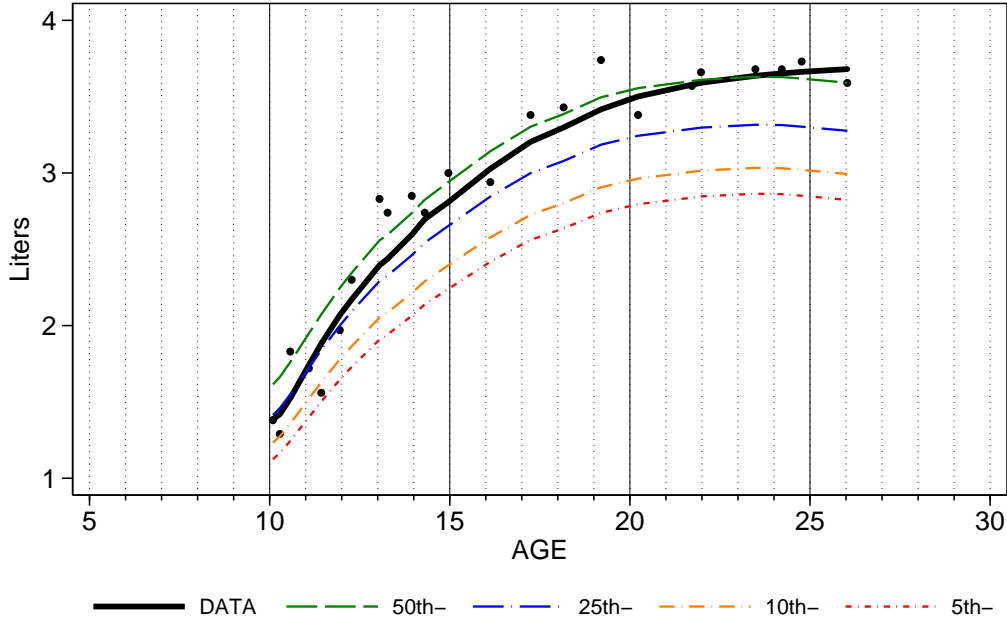

1081

**PATTERN OF GROWTH/DECLINE (Check One)**

- ( 1 ) Normal Growth
- ( 2 ) Normal Growth, Early Decline
- ( 3 ) Reduced Growth
- ( 4 ) Reduced Growth, Early Decline
- ( 9 ) Undetermined Pattern
- ( 8 ) Undetermined - not enough data

Maximum lung growth attained: ( 1 ) Yes ( 0 ) No

Plateau started: ( 2 ) No plateau ( 1 ) Yes ( 0 ) No

Decline started: ( 1 ) Yes ( 0 ) No

AGE AT each of the following periods (use '99' if N/A):

Maximum Lung Growth: \_\_\_\_ . \_\_\_\_

Start of Plateau: \_\_\_\_ . \_\_\_\_

Start of Decline: \_\_\_\_ . \_\_\_\_

### Pre-BD FEV1 Data and Percentiles: 1082

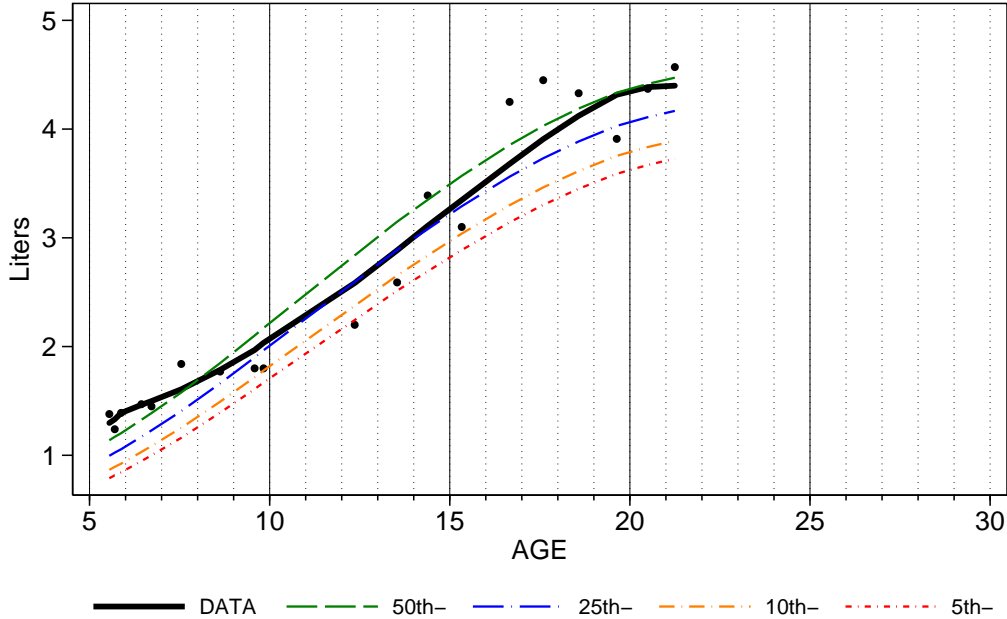

1082

**PATTERN OF GROWTH/DECLINE (Check One)**

- ( 1) Normal Growth
- ( 2) Normal Growth, Early Decline
- ( 3) Reduced Growth
- ( 4) Reduced Growth, Early Decline
- ( 9) Undetermined Pattern
- ( 8) Undetermined - not enough data

Maximum lung growth attained: ( 1) Yes ( 0) No

Plateau started: ( 2) No plateau ( 1) Yes ( 0) No

Decline started: ( 1) Yes ( 0) No

AGE AT each of the following periods (use '99' if N/A):

Maximum Lung Growth: \_\_\_\_ . \_\_\_\_

Start of Plateau: \_\_\_\_ . \_\_\_\_

Start of Decline: \_\_\_\_ . \_\_\_\_

### Pre-BD FEV1 Data and Percentiles: 1083

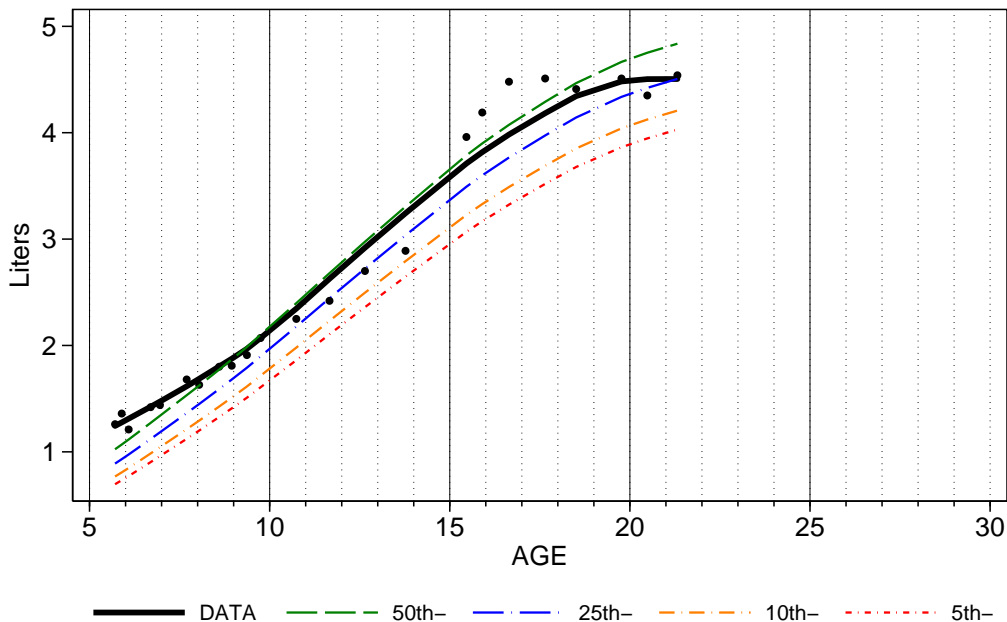

1083

**PATTERN OF GROWTH/DECLINE (Check One)**

- ( 1 ) Normal Growth
- ( 2 ) Normal Growth, Early Decline
- ( 3 ) Reduced Growth
- ( 4 ) Reduced Growth, Early Decline
- ( 9 ) Undetermined Pattern
- ( 8 ) Undetermined - not enough data

Maximum lung growth attained: ( 1 ) Yes ( 0 ) No

Plateau started: ( 2 ) No plateau ( 1 ) Yes ( 0 ) No

Decline started: ( 1 ) Yes ( 0 ) No

AGE AT each of the following periods (use '99' if N/A):

Maximum Lung Growth: \_\_\_\_ . \_\_\_\_

Start of Plateau: \_\_\_\_ . \_\_\_\_

Start of Decline: \_\_\_\_ . \_\_\_\_

### Pre-BD FEV1 Data and Percentiles: 1095

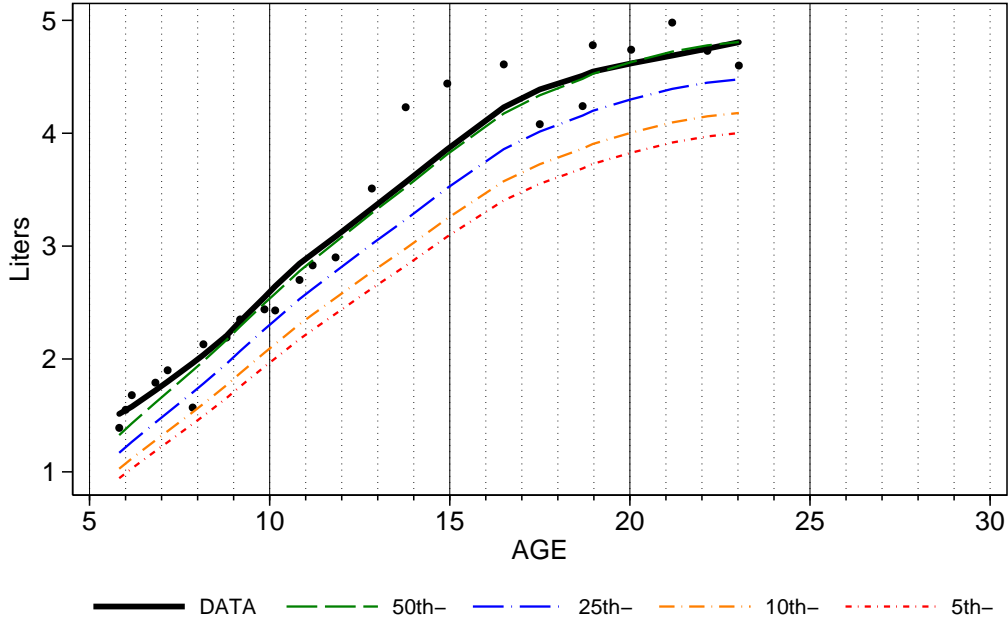

1095

**PATTERN OF GROWTH/DECLINE (Check One)**

- ( 1 ) Normal Growth
- ( 2 ) Normal Growth, Early Decline
- ( 3 ) Reduced Growth
- ( 4 ) Reduced Growth, Early Decline
- ( 9 ) Undetermined Pattern
- ( 8 ) Undetermined - not enough data

Maximum lung growth attained: ( 1 ) Yes ( 0 ) No

Plateau started: ( 2 ) No plateau ( 1 ) Yes ( 0 ) No

Decline started: ( 1 ) Yes ( 0 ) No

AGE AT each of the following periods (use '99' if N/A):

Maximum Lung Growth: \_\_\_\_ . \_\_\_\_

Start of Plateau: \_\_\_\_ . \_\_\_\_

Start of Decline: \_\_\_\_ . \_\_\_\_

### Pre-BD FEV1 Data and Percentiles: 1099

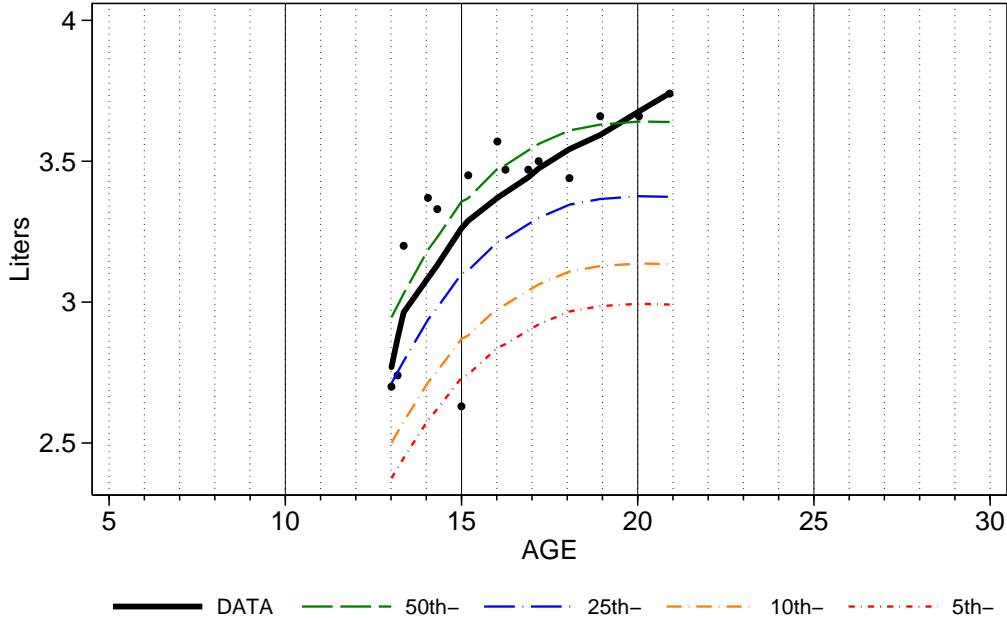

1099

**PATTERN OF GROWTH/DECLINE (Check One)**

- ( 1) Normal Growth
- ( 2) Normal Growth, Early Decline
- ( 3) Reduced Growth
- ( 4) Reduced Growth, Early Decline
- ( 9) Undetermined Pattern
- ( 8) Undetermined - not enough data

Maximum lung growth attained: ( 1) Yes ( 0) No

Plateau started: ( 2) No plateau ( 1) Yes ( 0) No

Decline started: ( 1) Yes ( 0) No

AGE AT each of the following periods (use '99' if N/A):

Maximum Lung Growth: \_\_\_\_ . \_\_\_\_

Start of Plateau: \_\_\_\_ . \_\_\_\_

Start of Decline: \_\_\_\_ . \_\_\_\_

### Pre-BD FEV1 Data and Percentiles: 1101

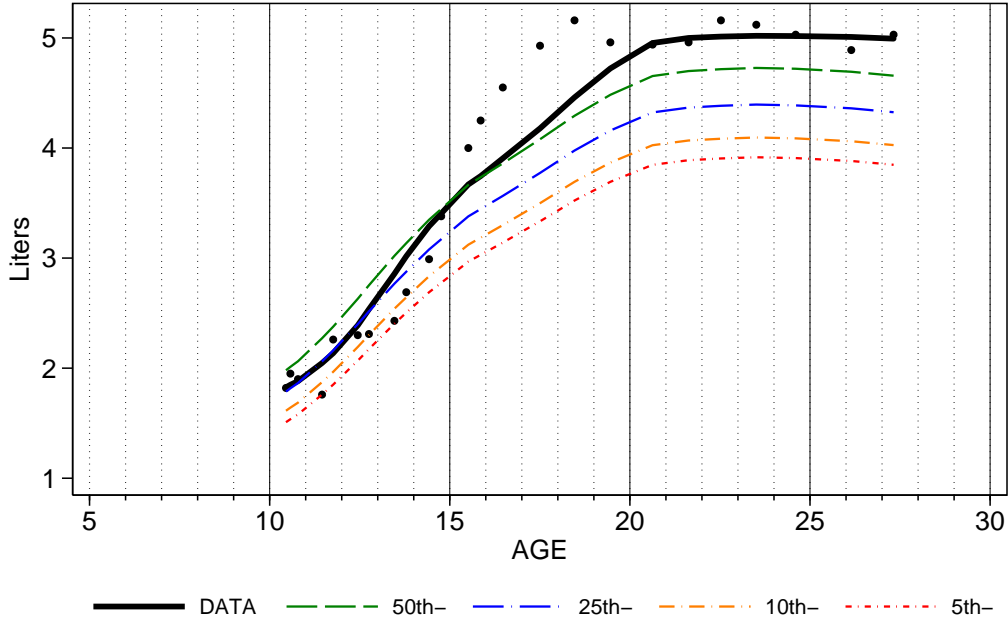

1101

**PATTERN OF GROWTH/DECLINE (Check One)**

- ( 1 ) Normal Growth
- ( 2 ) Normal Growth, Early Decline
- ( 3 ) Reduced Growth
- ( 4 ) Reduced Growth, Early Decline
- ( 9 ) Undetermined Pattern
- ( 8 ) Undetermined - not enough data

Maximum lung growth attained: ( 1 ) Yes ( 0 ) No

Plateau started: ( 2 ) No plateau ( 1 ) Yes ( 0 ) No

Decline started: ( 1 ) Yes ( 0 ) No

AGE AT each of the following periods (use '99' if N/A):

Maximum Lung Growth: \_\_\_\_ . \_\_\_\_

Start of Plateau: \_\_\_\_ . \_\_\_\_

Start of Decline: \_\_\_\_ . \_\_\_\_



### Pre-BD FEV1 Data and Percentiles: 1102

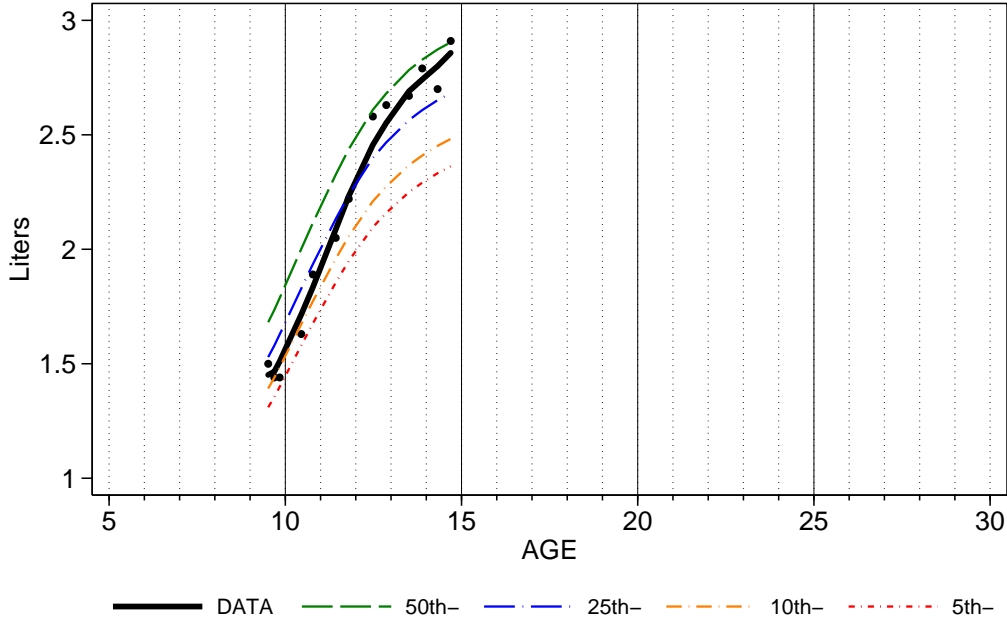

1102

**PATTERN OF GROWTH/DECLINE (Check One)**

- ( 1 ) Normal Growth
- ( 2 ) Normal Growth, Early Decline
- ( 3 ) Reduced Growth
- ( 4 ) Reduced Growth, Early Decline
- ( 9 ) Undetermined Pattern
- ( 8 ) Undetermined - not enough data

Maximum lung growth attained: ( 1 ) Yes ( 0 ) No

Plateau started: ( 2 ) No plateau ( 1 ) Yes ( 0 ) No

Decline started: ( 1 ) Yes ( 0 ) No

AGE AT each of the following periods (use '99' if N/A):

Maximum Lung Growth: \_\_\_\_ . \_\_\_\_

Start of Plateau: \_\_\_\_ . \_\_\_\_

Start of Decline: \_\_\_\_ . \_\_\_\_

### Pre-BD FEV1 Data and Percentiles: 1111

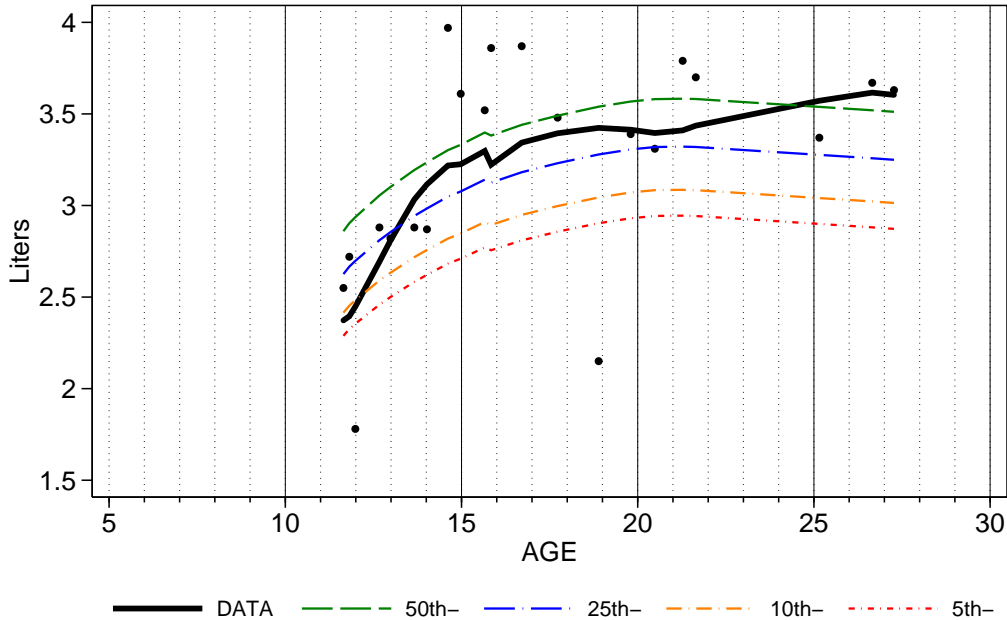

1111

**PATTERN OF GROWTH/DECLINE (Check One)**

- ( 1) Normal Growth
- ( 2) Normal Growth, Early Decline
- ( 3) Reduced Growth
- ( 4) Reduced Growth, Early Decline
- ( 9) Undetermined Pattern
- ( 8) Undetermined - not enough data

Maximum lung growth attained: ( 1) Yes ( 0) No

Plateau started: ( 2) No plateau ( 1) Yes ( 0) No

Decline started: ( 1) Yes ( 0) No

AGE AT each of the following periods (use '99' if N/A):

Maximum Lung Growth: \_\_\_\_ . \_\_\_\_

Start of Plateau: \_\_\_\_ . \_\_\_\_

Start of Decline: \_\_\_\_ . \_\_\_\_

### Pre-BD FEV1 Data and Percentiles: 1114

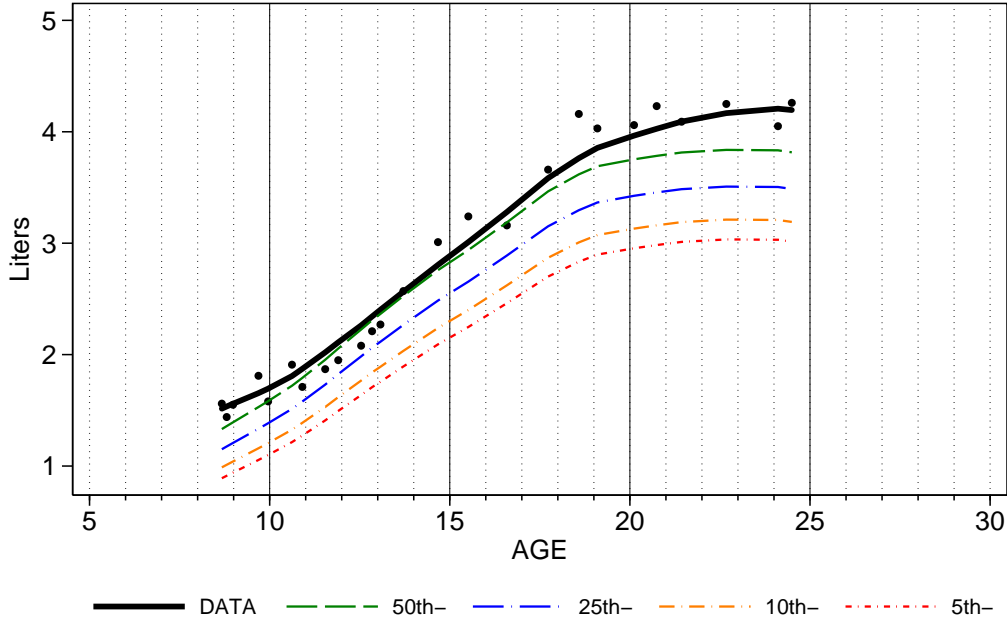

1114

**PATTERN OF GROWTH/DECLINE (Check One)**

- ( 1) Normal Growth
- ( 2) Normal Growth, Early Decline
- ( 3) Reduced Growth
- ( 4) Reduced Growth, Early Decline
- ( 9) Undetermined Pattern
- ( 8) Undetermined - not enough data

Maximum lung growth attained: ( 1) Yes ( 0) No

Plateau started: ( 2) No plateau ( 1) Yes ( 0) No

Decline started: ( 1) Yes ( 0) No

AGE AT each of the following periods (use '99' if N/A):

Maximum Lung Growth: \_\_\_\_ . \_\_\_\_

Start of Plateau: \_\_\_\_ . \_\_\_\_

Start of Decline: \_\_\_\_ . \_\_\_\_

### Pre-BD FEV1 Data and Percentiles: 1122

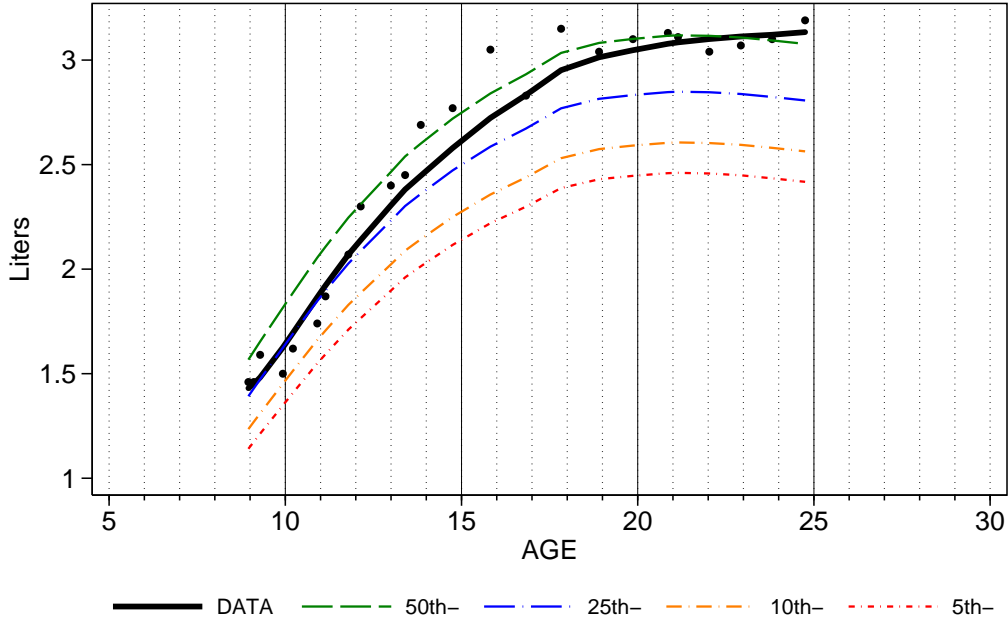

1122

**PATTERN OF GROWTH/DECLINE (Check One)**

- ( 1) Normal Growth
- ( 2) Normal Growth, Early Decline
- ( 3) Reduced Growth
- ( 4) Reduced Growth, Early Decline
- ( 9) Undetermined Pattern
- ( 8) Undetermined - not enough data

Maximum lung growth attained: ( 1) Yes ( 0) No

Plateau started: ( 2) No plateau ( 1) Yes ( 0) No

Decline started: ( 1) Yes ( 0) No

AGE AT each of the following periods (use '99' if N/A):

Maximum Lung Growth: \_\_\_\_ . \_\_\_\_

Start of Plateau: \_\_\_\_ . \_\_\_\_

Start of Decline: \_\_\_\_ . \_\_\_\_

### Pre-BD FEV1 Data and Percentiles: 1125

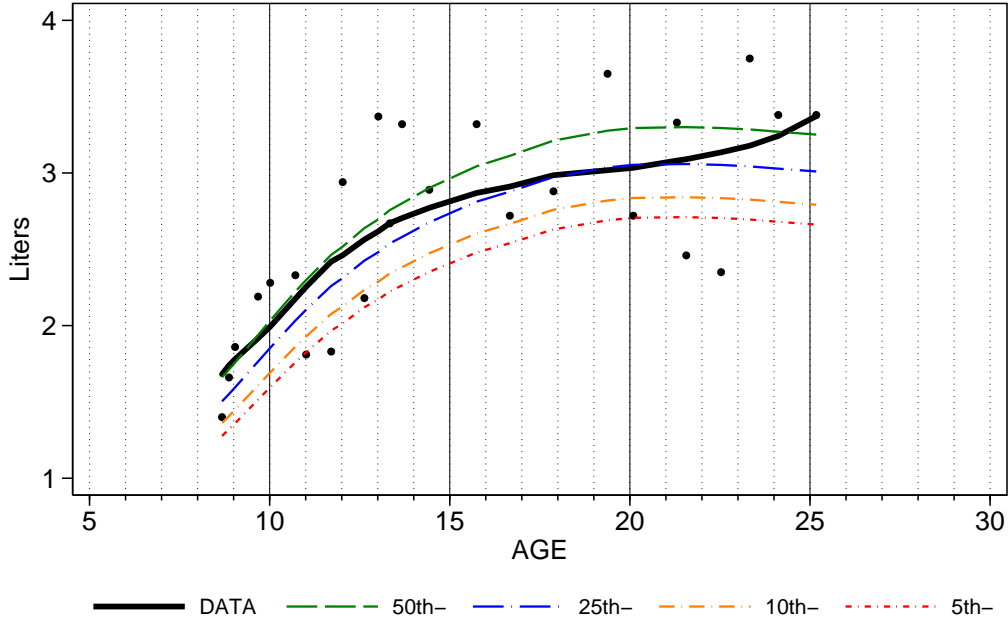

1125

**PATTERN OF GROWTH/DECLINE (Check One)**

- ( 1) Normal Growth
- ( 2) Normal Growth, Early Decline
- ( 3) Reduced Growth
- ( 4) Reduced Growth, Early Decline
- ( 9) Undetermined Pattern
- ( 8) Undetermined - not enough data

Maximum lung growth attained: ( 1) Yes ( 0) No

Plateau started: ( 2) No plateau ( 1) Yes ( 0) No

Decline started: ( 1) Yes ( 0) No

AGE AT each of the following periods (use '99' if N/A):

Maximum Lung Growth: \_\_\_\_ . \_\_\_\_

Start of Plateau: \_\_\_\_ . \_\_\_\_

Start of Decline: \_\_\_\_ . \_\_\_\_

### Pre-BD FEV1 Data and Percentiles: 1131

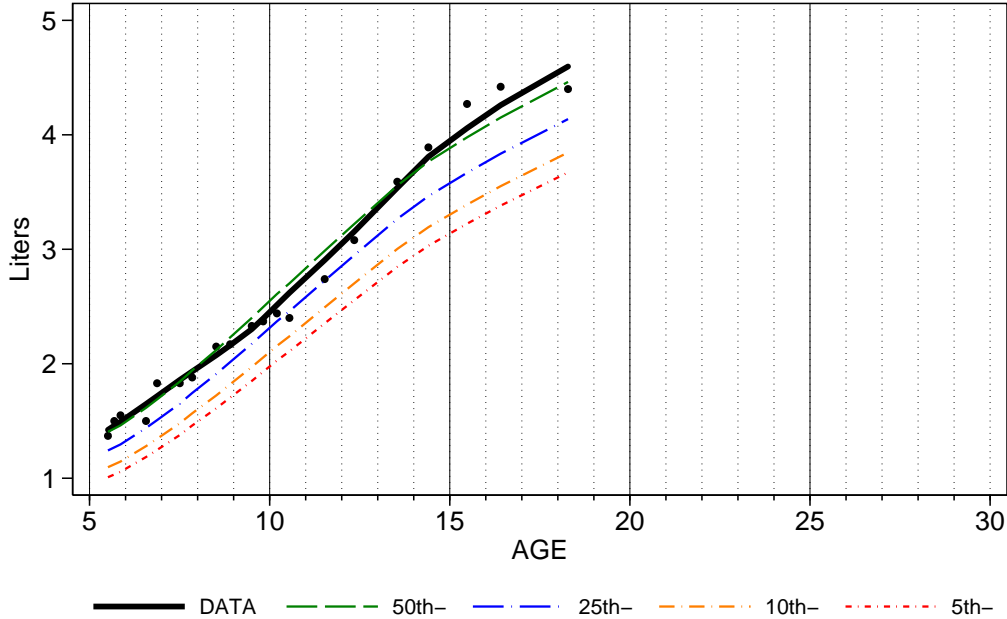

1131

**PATTERN OF GROWTH/DECLINE (Check One)**

- ( 1) Normal Growth
- ( 2) Normal Growth, Early Decline
- ( 3) Reduced Growth
- ( 4) Reduced Growth, Early Decline
- ( 9) Undetermined Pattern
- ( 8) Undetermined - not enough data

Maximum lung growth attained: ( 1) Yes ( 0) No

Plateau started: ( 2) No plateau ( 1) Yes ( 0) No

Decline started: ( 1) Yes ( 0) No

AGE AT each of the following periods (use '99' if N/A):

Maximum Lung Growth: \_\_\_\_ . \_\_\_\_

Start of Plateau: \_\_\_\_ . \_\_\_\_

Start of Decline: \_\_\_\_ . \_\_\_\_

### Pre-BD FEV1 Data and Percentiles: 1135

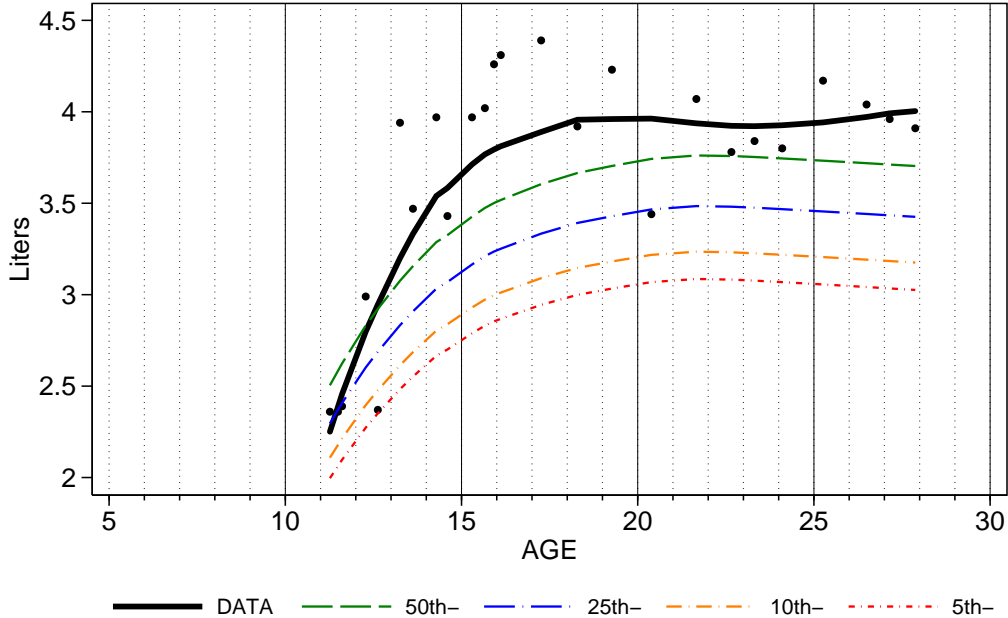

1135

**PATTERN OF GROWTH/DECLINE (Check One)**

- ( 1) Normal Growth
- ( 2) Normal Growth, Early Decline
- ( 3) Reduced Growth
- ( 4) Reduced Growth, Early Decline
- ( 9) Undetermined Pattern
- ( 8) Undetermined - not enough data

Maximum lung growth attained: ( 1) Yes ( 0) No

Plateau started: ( 2) No plateau ( 1) Yes ( 0) No

Decline started: ( 1) Yes ( 0) No

AGE AT each of the following periods (use '99' if N/A):

Maximum Lung Growth: \_\_\_\_ . \_\_\_\_

Start of Plateau: \_\_\_\_ . \_\_\_\_

Start of Decline: \_\_\_\_ . \_\_\_\_

### Pre-BD FEV1 Data and Percentiles: 1137

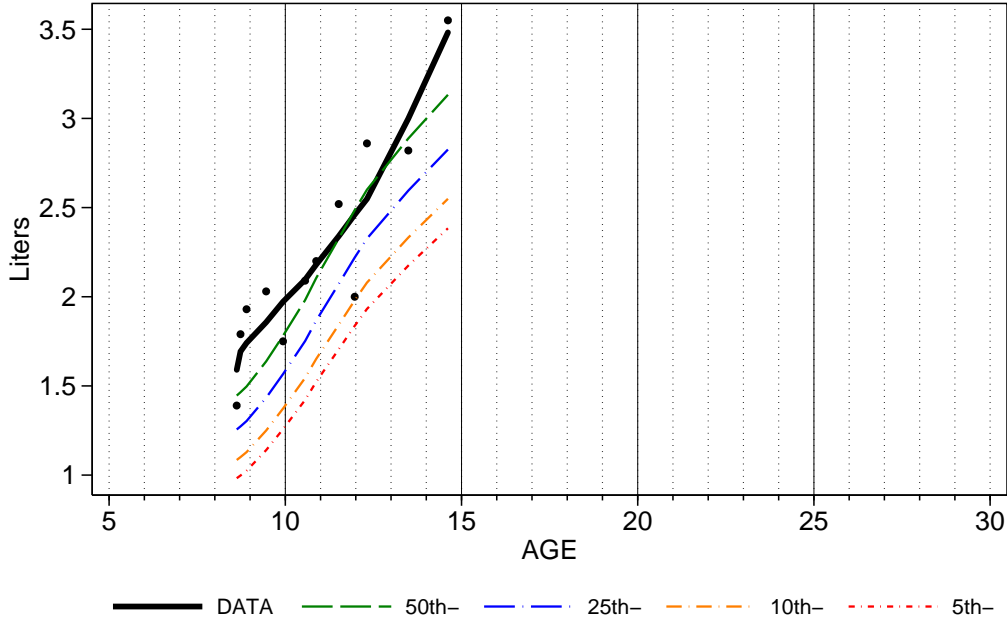

1137

**PATTERN OF GROWTH/DECLINE (Check One)**

- ( 1 ) Normal Growth
- ( 2 ) Normal Growth, Early Decline
- ( 3 ) Reduced Growth
- ( 4 ) Reduced Growth, Early Decline
- ( 9 ) Undetermined Pattern
- ( 8 ) Undetermined - not enough data

Maximum lung growth attained: ( 1 ) Yes ( 0 ) No

Plateau started: ( 2 ) No plateau ( 1 ) Yes ( 0 ) No

Decline started: ( 1 ) Yes ( 0 ) No

AGE AT each of the following periods (use '99' if N/A):

Maximum Lung Growth: \_\_\_\_ . \_\_\_\_

Start of Plateau: \_\_\_\_ . \_\_\_\_

Start of Decline: \_\_\_\_ . \_\_\_\_



### Pre-BD FEV1 Data and Percentiles: 1139

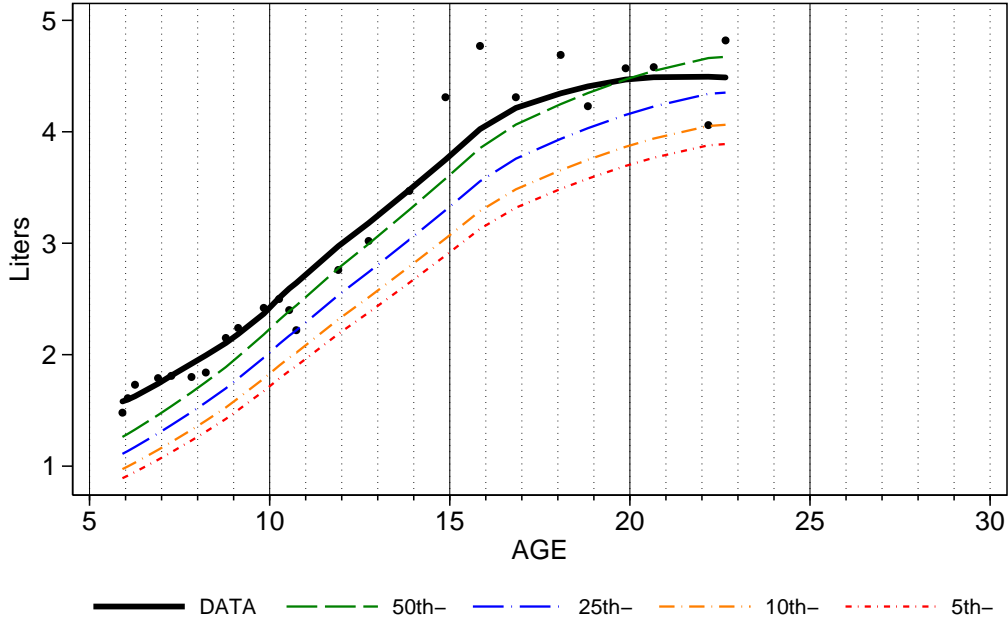

1139

**PATTERN OF GROWTH/DECLINE (Check One)**

- ( 1 ) Normal Growth
- ( 2 ) Normal Growth, Early Decline
- ( 3 ) Reduced Growth
- ( 4 ) Reduced Growth, Early Decline
- ( 9 ) Undetermined Pattern
- ( 8 ) Undetermined - not enough data

Maximum lung growth attained: ( 1 ) Yes ( 0 ) No

Plateau started: ( 2 ) No plateau ( 1 ) Yes ( 0 ) No

Decline started: ( 1 ) Yes ( 0 ) No

AGE AT each of the following periods (use '99' if N/A):

Maximum Lung Growth: \_\_\_\_ . \_\_\_\_

Start of Plateau: \_\_\_\_ . \_\_\_\_

Start of Decline: \_\_\_\_ . \_\_\_\_

### Pre-BD FEV1 Data and Percentiles: 1140

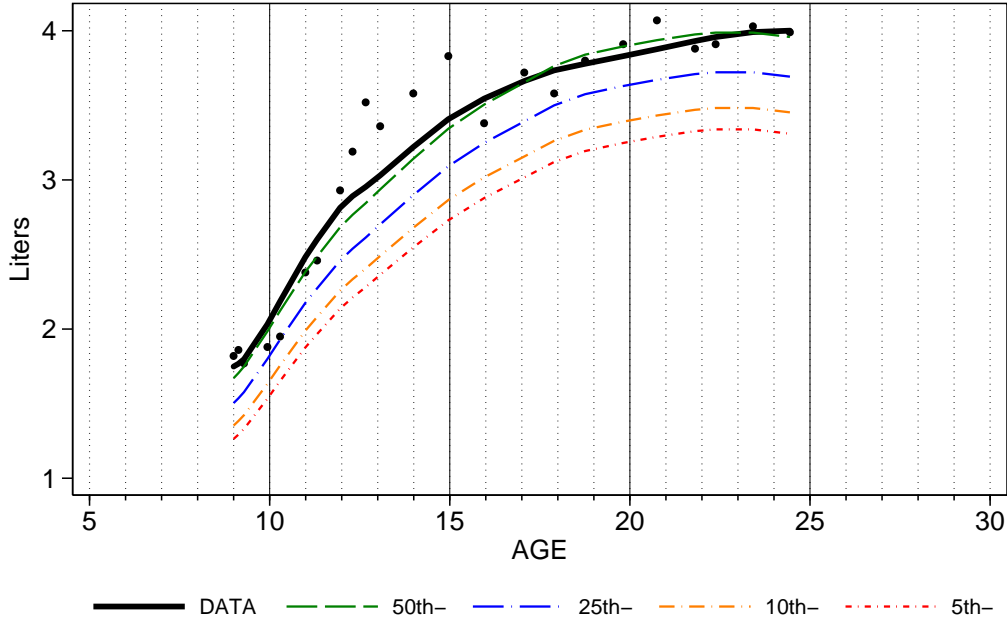

1140

**PATTERN OF GROWTH/DECLINE (Check One)**

- ( 1) Normal Growth
- ( 2) Normal Growth, Early Decline
- ( 3) Reduced Growth
- ( 4) Reduced Growth, Early Decline
- ( 9) Undetermined Pattern
- ( 8) Undetermined - not enough data

Maximum lung growth attained: ( 1) Yes ( 0) No

Plateau started: ( 2) No plateau ( 1) Yes ( 0) No

Decline started: ( 1) Yes ( 0) No

AGE AT each of the following periods (use '99' if N/A):

Maximum Lung Growth: \_\_\_\_ . \_\_\_\_

Start of Plateau: \_\_\_\_ . \_\_\_\_

Start of Decline: \_\_\_\_ . \_\_\_\_

### Pre-BD FEV1 Data and Percentiles: 1142

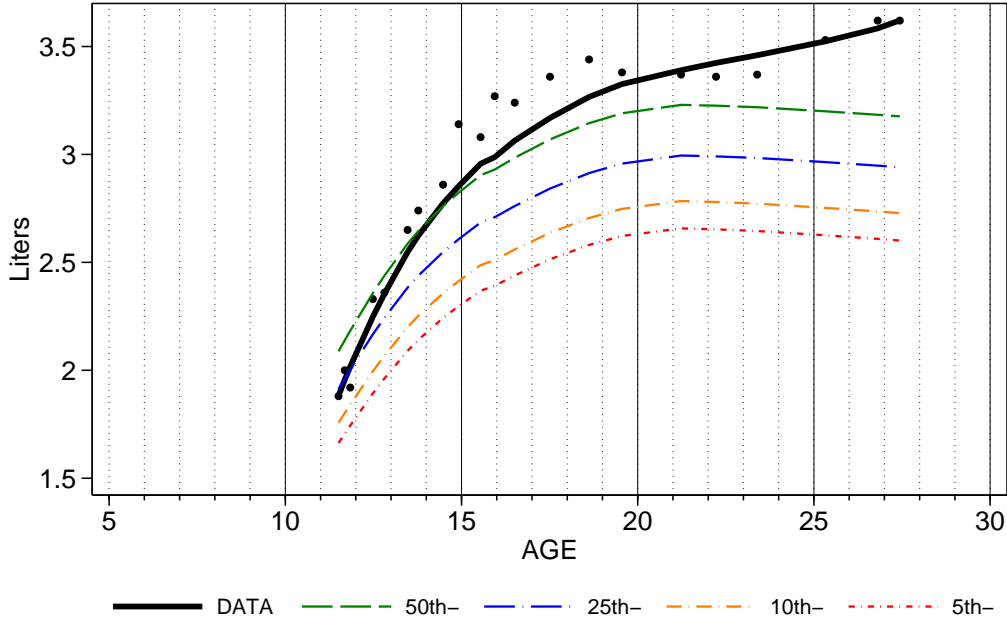

1142

**PATTERN OF GROWTH/DECLINE (Check One)**

- ( 1) Normal Growth
- ( 2) Normal Growth, Early Decline
- ( 3) Reduced Growth
- ( 4) Reduced Growth, Early Decline
- ( 9) Undetermined Pattern
- ( 8) Undetermined - not enough data

Maximum lung growth attained: ( 1) Yes ( 0) No

Plateau started: ( 2) No plateau ( 1) Yes ( 0) No

Decline started: ( 1) Yes ( 0) No

AGE AT each of the following periods (use '99' if N/A):

Maximum Lung Growth: \_\_\_\_ . \_\_\_\_

Start of Plateau: \_\_\_\_ . \_\_\_\_

Start of Decline: \_\_\_\_ . \_\_\_\_

### Pre-BD FEV1 Data and Percentiles: 1148

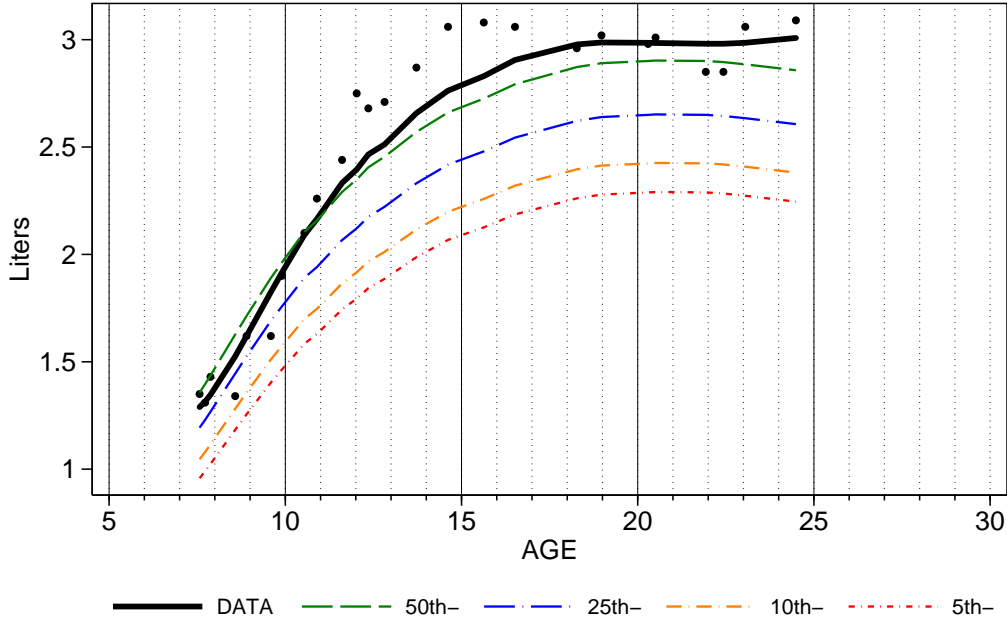

1148

**PATTERN OF GROWTH/DECLINE (Check One)**

- ( 1) Normal Growth
- ( 2) Normal Growth, Early Decline
- ( 3) Reduced Growth
- ( 4) Reduced Growth, Early Decline
- ( 9) Undetermined Pattern
- ( 8) Undetermined - not enough data

Maximum lung growth attained: ( 1) Yes ( 0) No

Plateau started: ( 2) No plateau ( 1) Yes ( 0) No

Decline started: ( 1) Yes ( 0) No

AGE AT each of the following periods (use '99' if N/A):

Maximum Lung Growth: \_\_\_\_ . \_\_\_\_

Start of Plateau: \_\_\_\_ . \_\_\_\_

Start of Decline: \_\_\_\_ . \_\_\_\_

### Pre-BD FEV1 Data and Percentiles: 1159

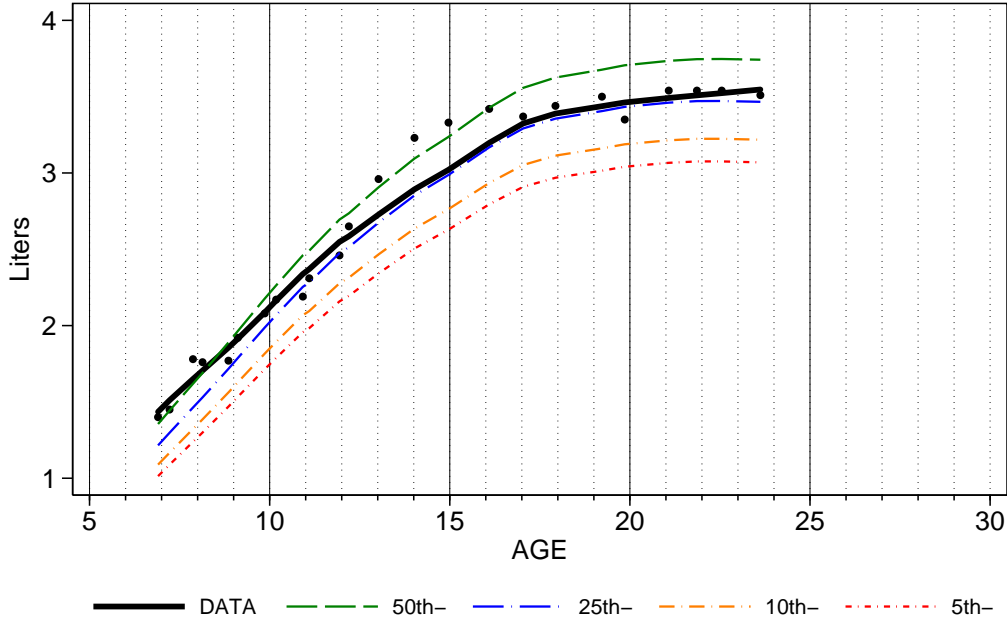

1159

**PATTERN OF GROWTH/DECLINE (Check One)**

- ( 1 ) Normal Growth
- ( 2 ) Normal Growth, Early Decline
- ( 3 ) Reduced Growth
- ( 4 ) Reduced Growth, Early Decline
- ( 9 ) Undetermined Pattern
- ( 8 ) Undetermined - not enough data

Maximum lung growth attained: ( 1 ) Yes ( 0 ) No

Plateau started: ( 2 ) No plateau ( 1 ) Yes ( 0 ) No

Decline started: ( 1 ) Yes ( 0 ) No

AGE AT each of the following periods (use '99' if N/A):

Maximum Lung Growth: \_\_\_\_ . \_\_\_\_

Start of Plateau: \_\_\_\_ . \_\_\_\_

Start of Decline: \_\_\_\_ . \_\_\_\_

### Pre-BD FEV1 Data and Percentiles: 1164

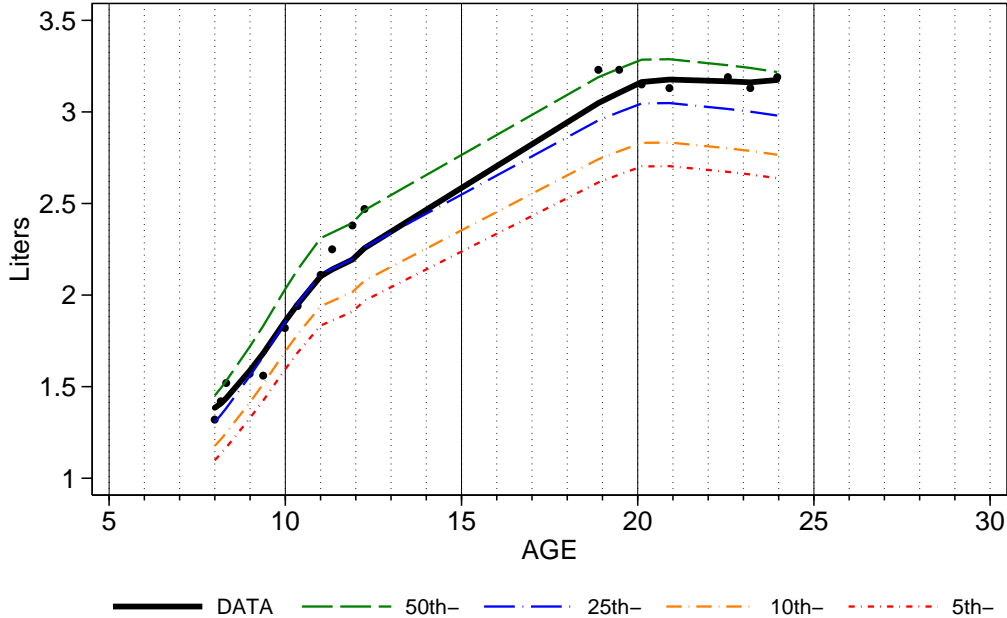

1164

**PATTERN OF GROWTH/DECLINE (Check One)**

- ( 1 ) Normal Growth
- ( 2 ) Normal Growth, Early Decline
- ( 3 ) Reduced Growth
- ( 4 ) Reduced Growth, Early Decline
- ( 9 ) Undetermined Pattern
- ( 8 ) Undetermined - not enough data

Maximum lung growth attained: ( 1 ) Yes ( 0 ) No

Plateau started: ( 2 ) No plateau ( 1 ) Yes ( 0 ) No

Decline started: ( 1 ) Yes ( 0 ) No

AGE AT each of the following periods (use '99' if N/A):

Maximum Lung Growth: \_\_\_\_ . \_\_\_\_

Start of Plateau: \_\_\_\_ . \_\_\_\_

Start of Decline: \_\_\_\_ . \_\_\_\_

### Pre-BD FEV1 Data and Percentiles: 1167

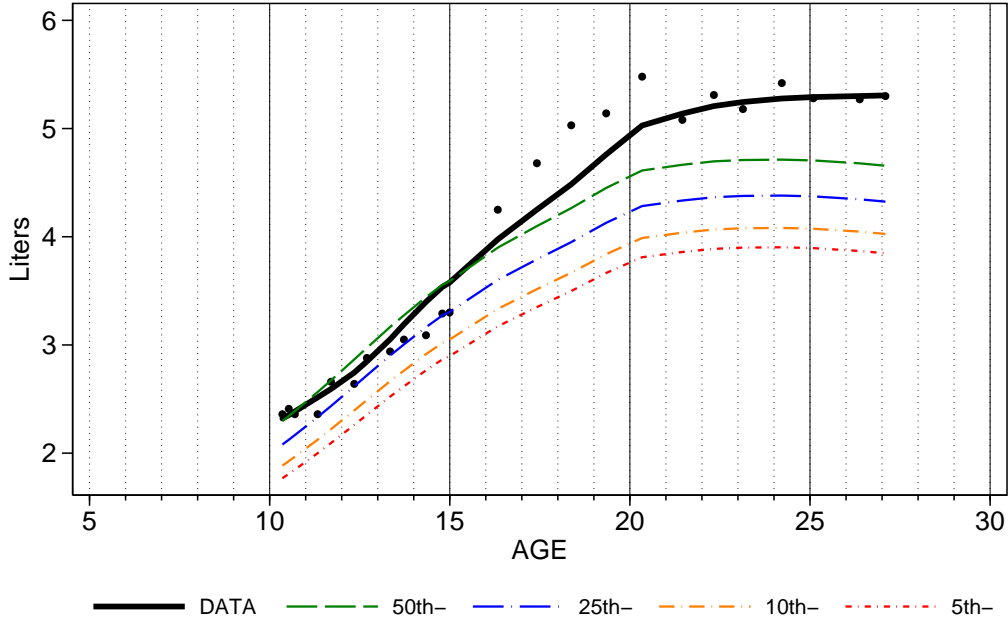

1167

**PATTERN OF GROWTH/DECLINE (Check One)**

- ( 1 ) Normal Growth
- ( 2 ) Normal Growth, Early Decline
- ( 3 ) Reduced Growth
- ( 4 ) Reduced Growth, Early Decline
- ( 9 ) Undetermined Pattern
- ( 8 ) Undetermined - not enough data

Maximum lung growth attained: ( 1 ) Yes ( 0 ) No

Plateau started: ( 2 ) No plateau ( 1 ) Yes ( 0 ) No

Decline started: ( 1 ) Yes ( 0 ) No

AGE AT each of the following periods (use '99' if N/A):

Maximum Lung Growth: \_\_\_\_ . \_\_\_\_

Start of Plateau: \_\_\_\_ . \_\_\_\_

Start of Decline: \_\_\_\_ . \_\_\_\_

### Pre-BD FEV1 Data and Percentiles: 1168

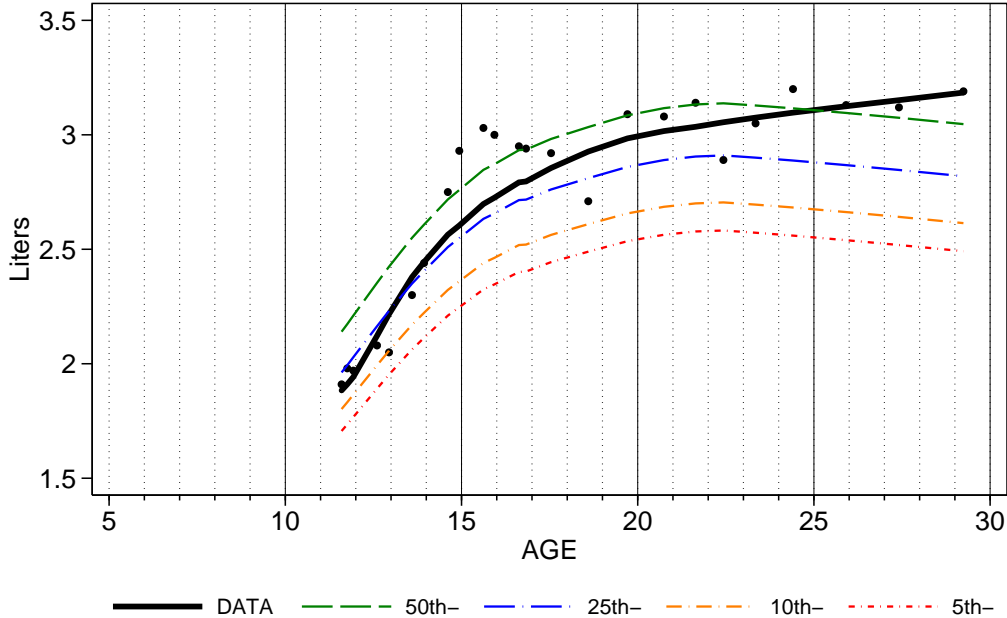

1168

**PATTERN OF GROWTH/DECLINE (Check One)**

- ( 1) Normal Growth
- ( 2) Normal Growth, Early Decline
- ( 3) Reduced Growth
- ( 4) Reduced Growth, Early Decline
- ( 9) Undetermined Pattern
- ( 8) Undetermined - not enough data

Maximum lung growth attained: ( 1) Yes ( 0) No

Plateau started: ( 2) No plateau ( 1) Yes ( 0) No

Decline started: ( 1) Yes ( 0) No

AGE AT each of the following periods (use '99' if N/A):

Maximum Lung Growth: \_\_\_\_ . \_\_\_\_

Start of Plateau: \_\_\_\_ . \_\_\_\_

Start of Decline: \_\_\_\_ . \_\_\_\_



### Pre-BD FEV1 Data and Percentiles: 1170

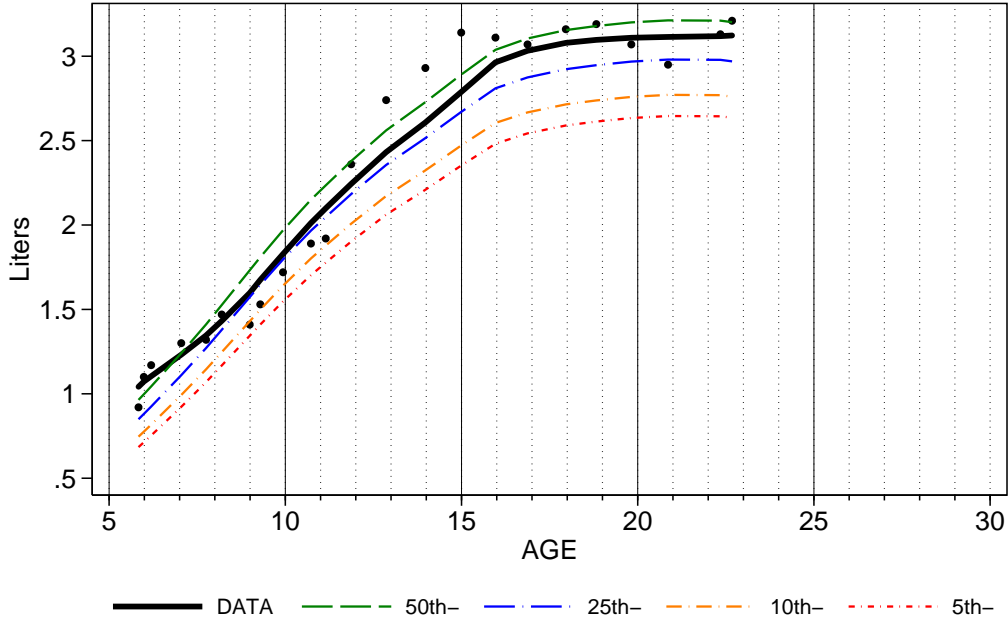

1170

**PATTERN OF GROWTH/DECLINE (Check One)**

- ( 1) Normal Growth
- ( 2) Normal Growth, Early Decline
- ( 3) Reduced Growth
- ( 4) Reduced Growth, Early Decline
- ( 9) Undetermined Pattern
- ( 8) Undetermined - not enough data

Maximum lung growth attained: ( 1) Yes ( 0) No

Plateau started: ( 2) No plateau ( 1) Yes ( 0) No

Decline started: ( 1) Yes ( 0) No

AGE AT each of the following periods (use '99' if N/A):

Maximum Lung Growth: \_\_\_\_ . \_\_\_\_

Start of Plateau: \_\_\_\_ . \_\_\_\_

Start of Decline: \_\_\_\_ . \_\_\_\_

### Pre-BD FEV1 Data and Percentiles: 1171

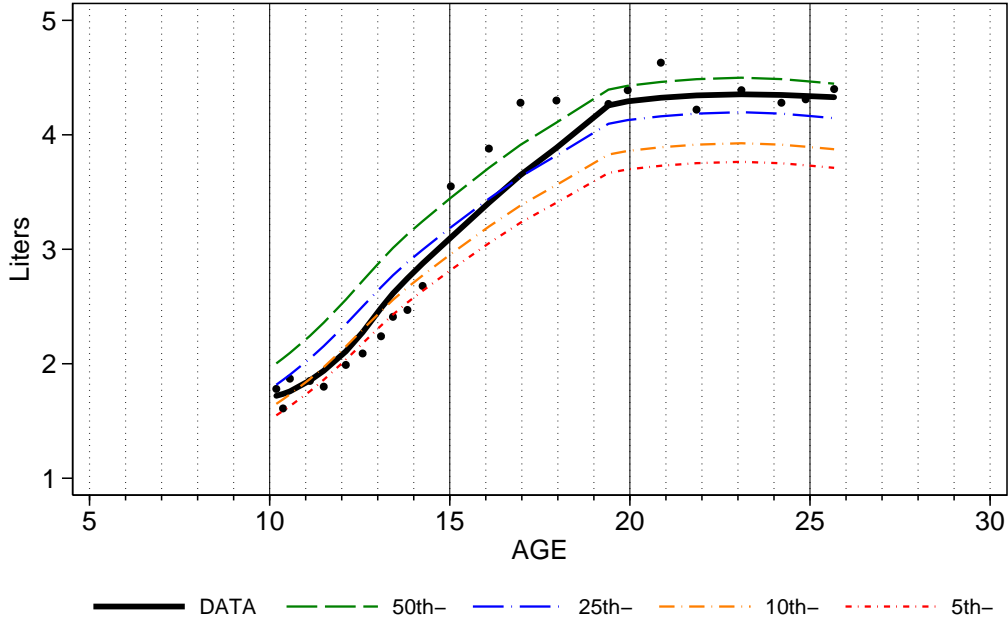

1171

**PATTERN OF GROWTH/DECLINE (Check One)**

- ( 1) Normal Growth
- ( 2) Normal Growth, Early Decline
- ( 3) Reduced Growth
- ( 4) Reduced Growth, Early Decline
- ( 9) Undetermined Pattern
- ( 8) Undetermined - not enough data

Maximum lung growth attained: ( 1) Yes ( 0) No

Plateau started: ( 2) No plateau ( 1) Yes ( 0) No

Decline started: ( 1) Yes ( 0) No

AGE AT each of the following periods (use '99' if N/A):

Maximum Lung Growth: \_\_\_\_ . \_\_\_\_

Start of Plateau: \_\_\_\_ . \_\_\_\_

Start of Decline: \_\_\_\_ . \_\_\_\_

### Pre-BD FEV1 Data and Percentiles: 1176

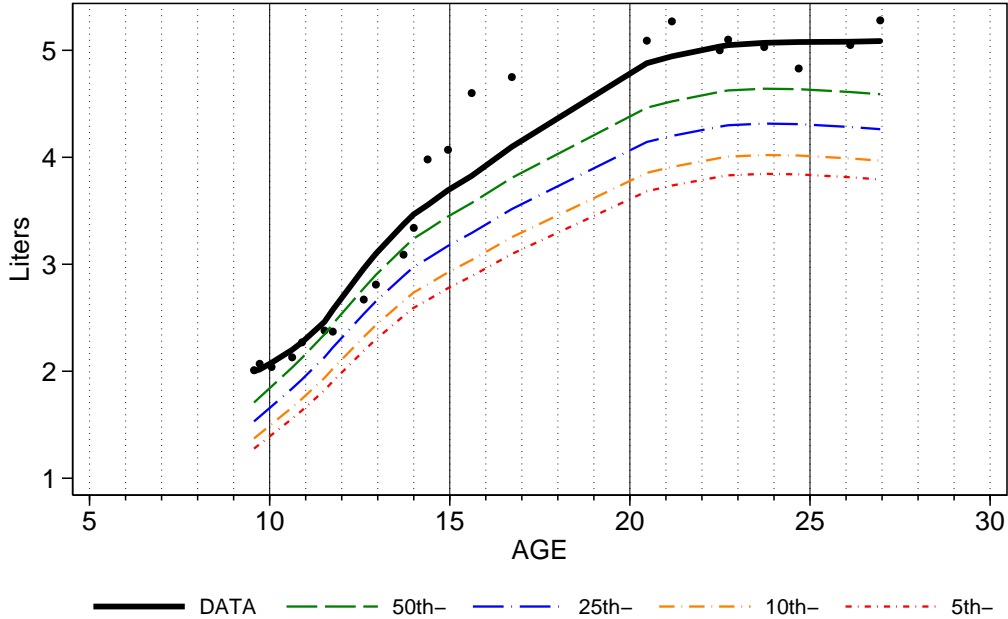

1176

**PATTERN OF GROWTH/DECLINE (Check One)**

- ( 1 ) Normal Growth
- ( 2 ) Normal Growth, Early Decline
- ( 3 ) Reduced Growth
- ( 4 ) Reduced Growth, Early Decline
- ( 9 ) Undetermined Pattern
- ( 8 ) Undetermined - not enough data

Maximum lung growth attained: ( 1 ) Yes ( 0 ) No

Plateau started: ( 2 ) No plateau ( 1 ) Yes ( 0 ) No

Decline started: ( 1 ) Yes ( 0 ) No

AGE AT each of the following periods (use '99' if N/A):

Maximum Lung Growth: \_\_\_\_ . \_\_\_\_

Start of Plateau: \_\_\_\_ . \_\_\_\_

Start of Decline: \_\_\_\_ . \_\_\_\_

### Pre-BD FEV1 Data and Percentiles: 1177

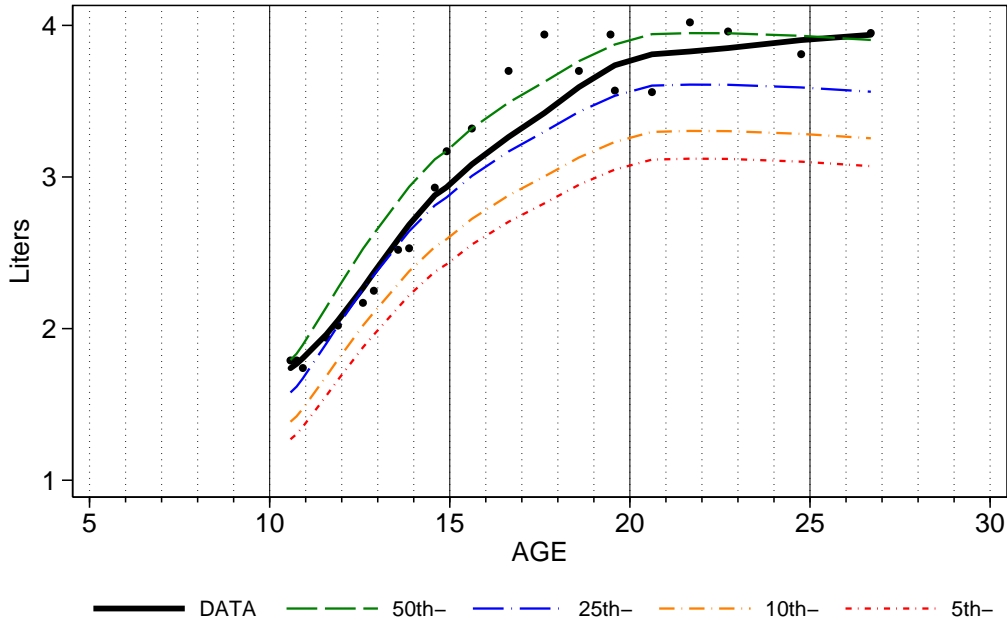

1177

**PATTERN OF GROWTH/DECLINE (Check One)**

- ( 1 ) Normal Growth
- ( 2 ) Normal Growth, Early Decline
- ( 3 ) Reduced Growth
- ( 4 ) Reduced Growth, Early Decline
- ( 9 ) Undetermined Pattern
- ( 8 ) Undetermined - not enough data

Maximum lung growth attained: ( 1 ) Yes ( 0 ) No

Plateau started: ( 2 ) No plateau ( 1 ) Yes ( 0 ) No

Decline started: ( 1 ) Yes ( 0 ) No

AGE AT each of the following periods (use '99' if N/A):

Maximum Lung Growth: \_\_\_\_ . \_\_\_\_

Start of Plateau: \_\_\_\_ . \_\_\_\_

Start of Decline: \_\_\_\_ . \_\_\_\_

### Pre-BD FEV1 Data and Percentiles: 1186

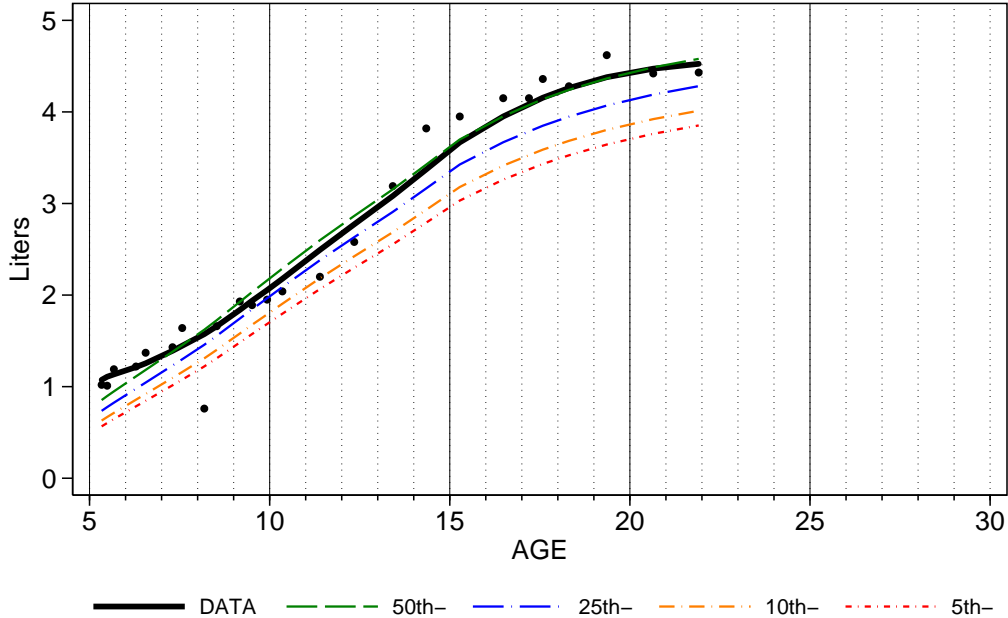

1186

**PATTERN OF GROWTH/DECLINE (Check One)**

- ( 1) Normal Growth
- ( 2) Normal Growth, Early Decline
- ( 3) Reduced Growth
- ( 4) Reduced Growth, Early Decline
- ( 9) Undetermined Pattern
- ( 8) Undetermined - not enough data

Maximum lung growth attained: ( 1) Yes ( 0) No

Plateau started: ( 2) No plateau ( 1) Yes ( 0) No

Decline started: ( 1) Yes ( 0) No

AGE AT each of the following periods (use '99' if N/A):

Maximum Lung Growth: \_\_\_\_ . \_\_\_\_

Start of Plateau: \_\_\_\_ . \_\_\_\_

Start of Decline: \_\_\_\_ . \_\_\_\_

### Pre-BD FEV1 Data and Percentiles: 1188

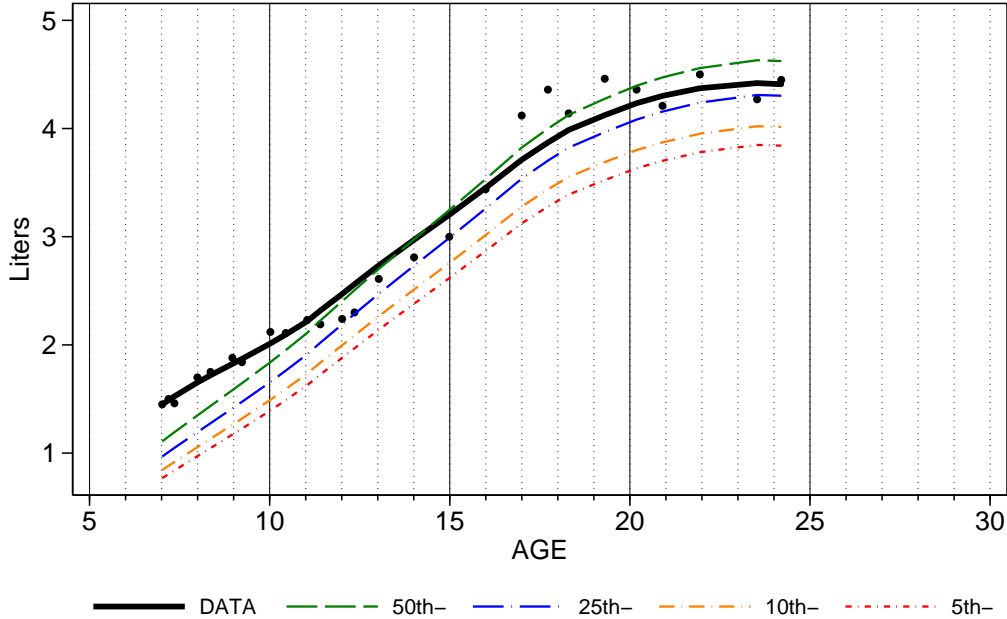

1188

**PATTERN OF GROWTH/DECLINE (Check One)**

- ( 1) Normal Growth
- ( 2) Normal Growth, Early Decline
- ( 3) Reduced Growth
- ( 4) Reduced Growth, Early Decline
- ( 9) Undetermined Pattern
- ( 8) Undetermined - not enough data

Maximum lung growth attained: ( 1) Yes ( 0) No

Plateau started: ( 2) No plateau ( 1) Yes ( 0) No

Decline started: ( 1) Yes ( 0) No

AGE AT each of the following periods (use '99' if N/A):

Maximum Lung Growth: \_\_\_\_ . \_\_\_\_

Start of Plateau: \_\_\_\_ . \_\_\_\_

Start of Decline: \_\_\_\_ . \_\_\_\_

### Pre-BD FEV1 Data and Percentiles: 1195

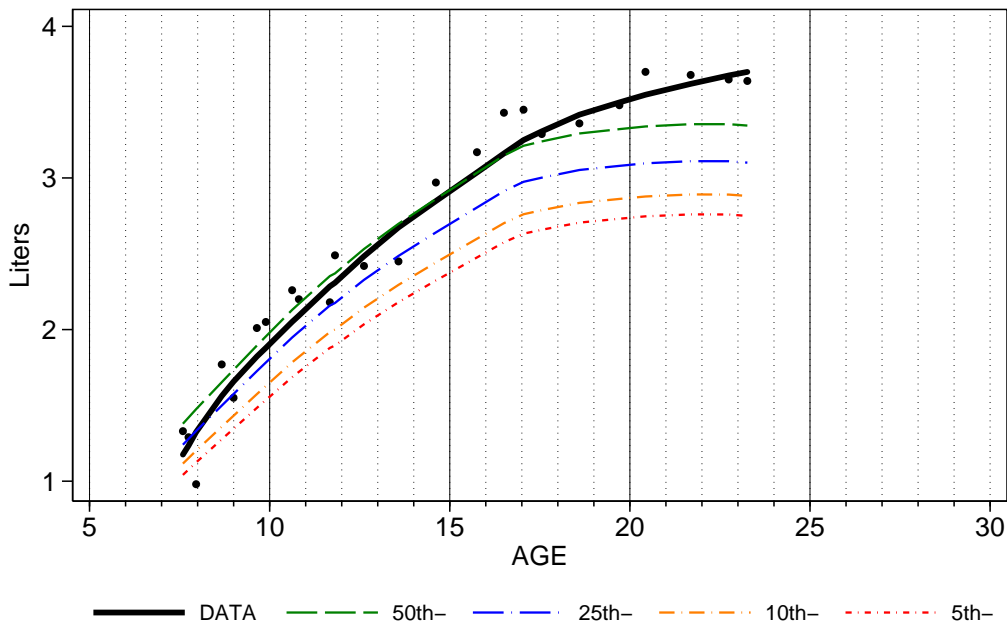

1195

**PATTERN OF GROWTH/DECLINE (Check One)**

- ( 1 ) Normal Growth
- ( 2 ) Normal Growth, Early Decline
- ( 3 ) Reduced Growth
- ( 4 ) Reduced Growth, Early Decline
- ( 9 ) Undetermined Pattern
- ( 8 ) Undetermined - not enough data

Maximum lung growth attained: ( 1 ) Yes ( 0 ) No

Plateau started: ( 2 ) No plateau ( 1 ) Yes ( 0 ) No

Decline started: ( 1 ) Yes ( 0 ) No

AGE AT each of the following periods (use '99' if N/A):

Maximum Lung Growth: \_\_\_\_ . \_\_\_\_

Start of Plateau: \_\_\_\_ . \_\_\_\_

Start of Decline: \_\_\_\_ . \_\_\_\_

### Pre-BD FEV1 Data and Percentiles: 1196

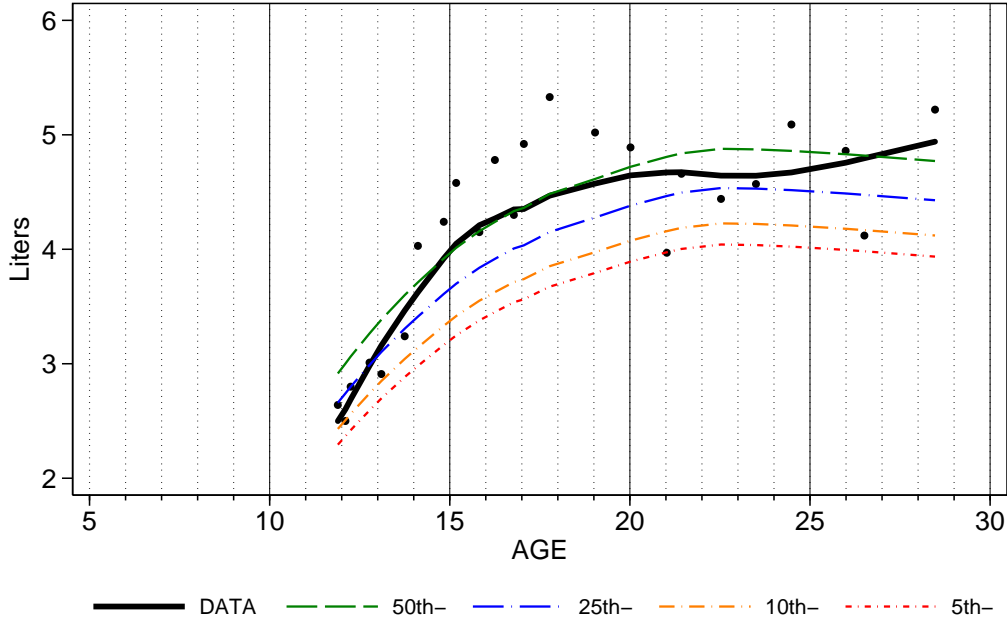

1196

**PATTERN OF GROWTH/DECLINE (Check One)**

- ( 1 ) Normal Growth
- ( 2 ) Normal Growth, Early Decline
- ( 3 ) Reduced Growth
- ( 4 ) Reduced Growth, Early Decline
- ( 9 ) Undetermined Pattern
- ( 8 ) Undetermined - not enough data

Maximum lung growth attained: ( 1 ) Yes ( 0 ) No

Plateau started: ( 2 ) No plateau ( 1 ) Yes ( 0 ) No

Decline started: ( 1 ) Yes ( 0 ) No

AGE AT each of the following periods (use '99' if N/A):

Maximum Lung Growth: \_\_\_\_ . \_\_\_\_

Start of Plateau: \_\_\_\_ . \_\_\_\_

Start of Decline: \_\_\_\_ . \_\_\_\_



### Pre-BD FEV1 Data and Percentiles: 1199

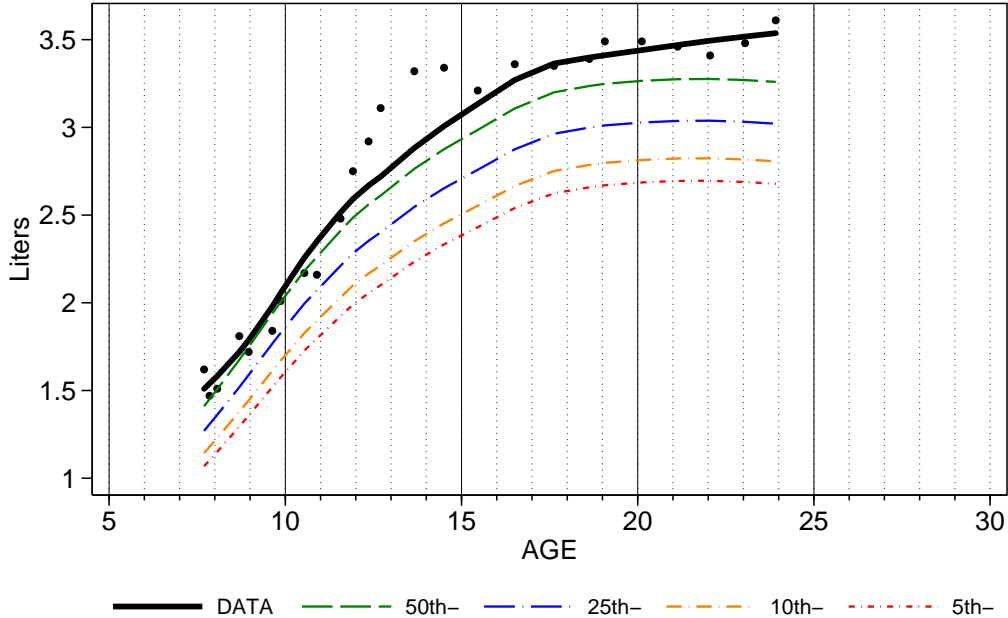

1199

**PATTERN OF GROWTH/DECLINE (Check One)**

- ( 1 ) Normal Growth
- ( 2 ) Normal Growth, Early Decline
- ( 3 ) Reduced Growth
- ( 4 ) Reduced Growth, Early Decline
- ( 9 ) Undetermined Pattern
- ( 8 ) Undetermined - not enough data

Maximum lung growth attained: ( 1 ) Yes ( 0 ) No

Plateau started: ( 2 ) No plateau ( 1 ) Yes ( 0 ) No

Decline started: ( 1 ) Yes ( 0 ) No

AGE AT each of the following periods (use '99' if N/A):

Maximum Lung Growth: \_\_\_\_ . \_\_\_\_

Start of Plateau: \_\_\_\_ . \_\_\_\_

Start of Decline: \_\_\_\_ . \_\_\_\_

### Pre-BD FEV1 Data and Percentiles: 1204

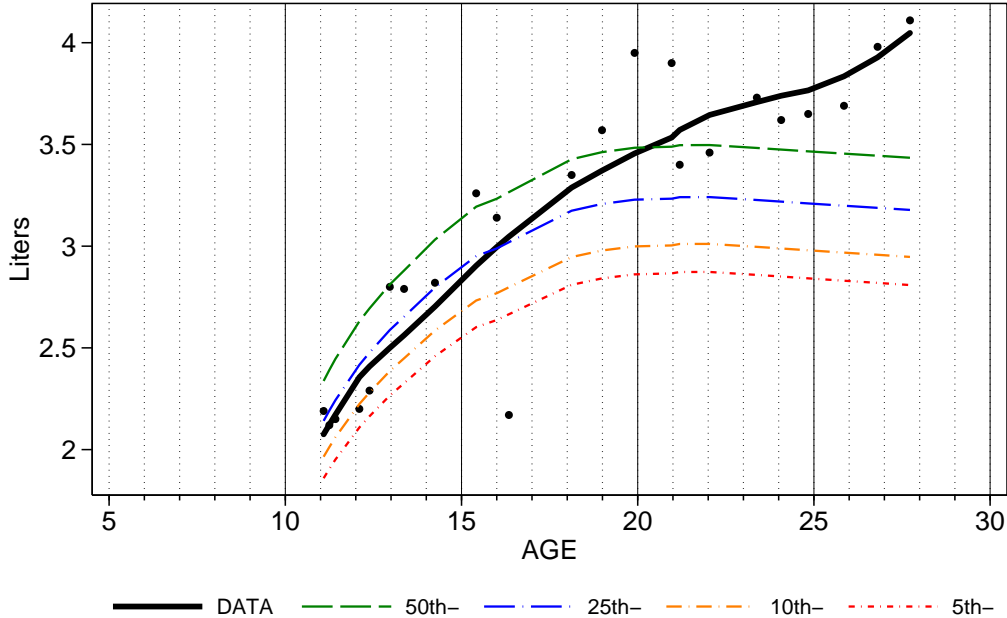

1204

**PATTERN OF GROWTH/DECLINE (Check One)**

- ( 1 ) Normal Growth
- ( 2 ) Normal Growth, Early Decline
- ( 3 ) Reduced Growth
- ( 4 ) Reduced Growth, Early Decline
- ( 9 ) Undetermined Pattern
- ( 8 ) Undetermined - not enough data

Maximum lung growth attained: ( 1 ) Yes ( 0 ) No

Plateau started: ( 2 ) No plateau ( 1 ) Yes ( 0 ) No

Decline started: ( 1 ) Yes ( 0 ) No

AGE AT each of the following periods (use '99' if N/A):

Maximum Lung Growth: \_\_\_\_ . \_\_\_\_

Start of Plateau: \_\_\_\_ . \_\_\_\_

Start of Decline: \_\_\_\_ . \_\_\_\_

### Pre-BD FEV1 Data and Percentiles: 1206

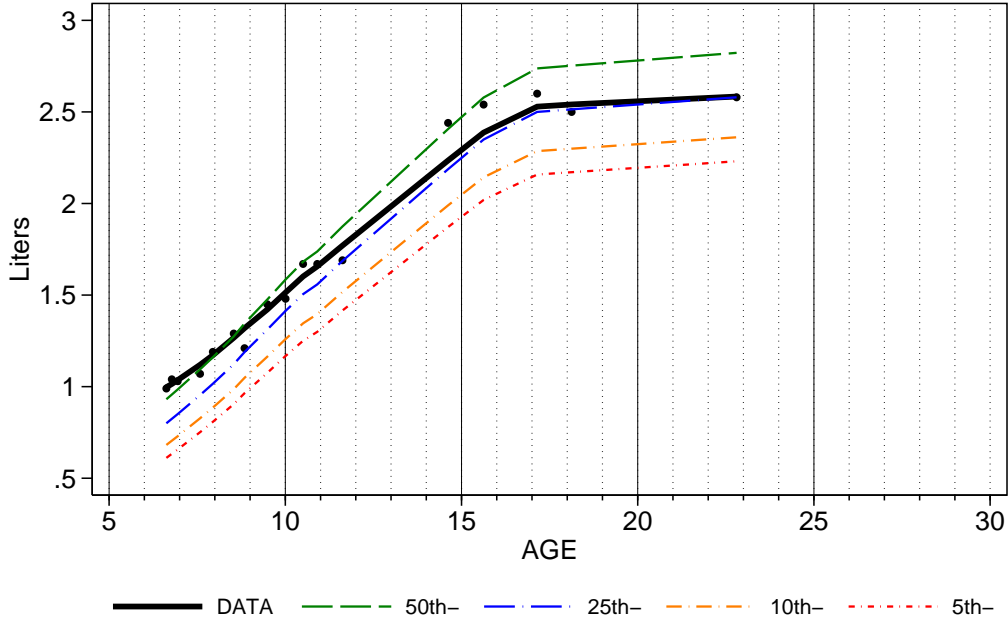

1206

**PATTERN OF GROWTH/DECLINE (Check One)**

- ( 1) Normal Growth
- ( 2) Normal Growth, Early Decline
- ( 3) Reduced Growth
- ( 4) Reduced Growth, Early Decline
- ( 9) Undetermined Pattern
- ( 8) Undetermined - not enough data

Maximum lung growth attained: ( 1) Yes ( 0) No

Plateau started: ( 2) No plateau ( 1) Yes ( 0) No

Decline started: ( 1) Yes ( 0) No

AGE AT each of the following periods (use '99' if N/A):

Maximum Lung Growth: \_\_\_\_ . \_\_\_\_

Start of Plateau: \_\_\_\_ . \_\_\_\_

Start of Decline: \_\_\_\_ . \_\_\_\_

### Pre-BD FEV1 Data and Percentiles: 1208

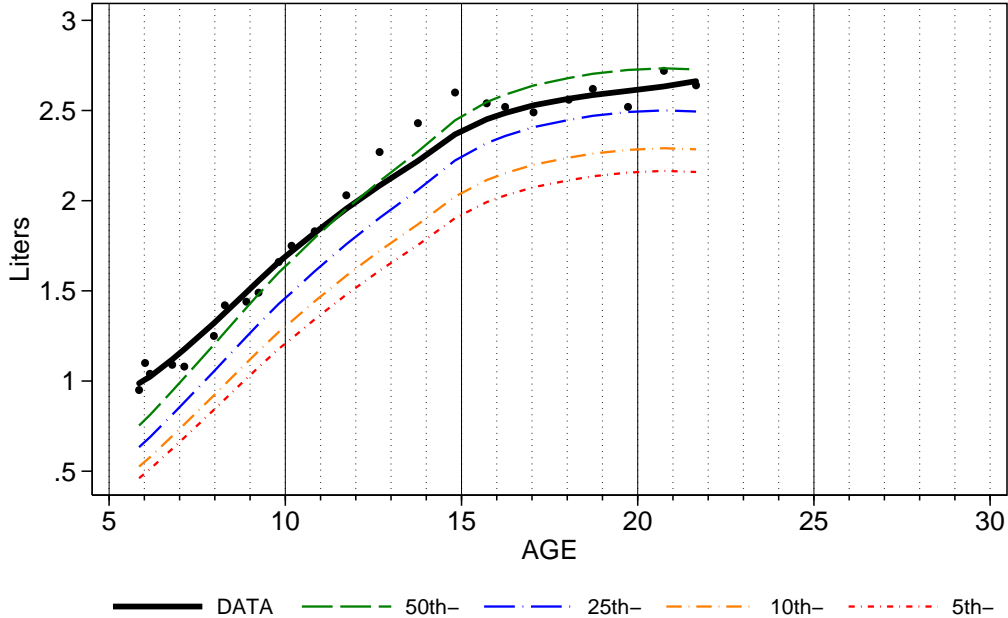

1208

**PATTERN OF GROWTH/DECLINE (Check One)**

- ( 1) Normal Growth
- ( 2) Normal Growth, Early Decline
- ( 3) Reduced Growth
- ( 4) Reduced Growth, Early Decline
- ( 9) Undetermined Pattern
- ( 8) Undetermined - not enough data

Maximum lung growth attained: ( 1) Yes ( 0) No

Plateau started: ( 2) No plateau ( 1) Yes ( 0) No

Decline started: ( 1) Yes ( 0) No

AGE AT each of the following periods (use '99' if N/A):

Maximum Lung Growth: \_\_\_\_ . \_\_\_\_

Start of Plateau: \_\_\_\_ . \_\_\_\_

Start of Decline: \_\_\_\_ . \_\_\_\_

### Pre-BD FEV1 Data and Percentiles: 1210

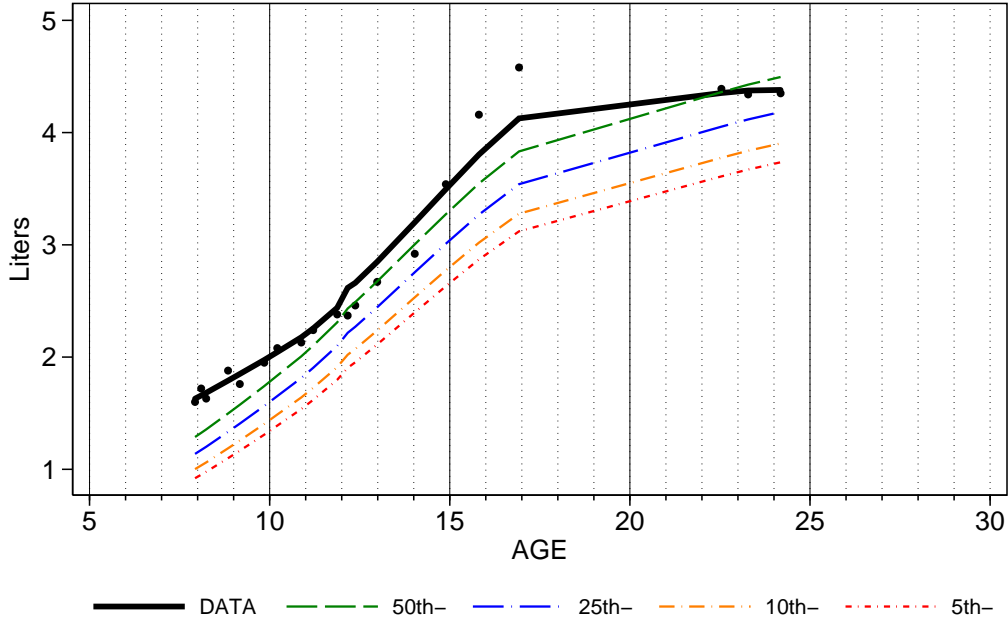

1210

**PATTERN OF GROWTH/DECLINE (Check One)**

- ( 1 ) Normal Growth
- ( 2 ) Normal Growth, Early Decline
- ( 3 ) Reduced Growth
- ( 4 ) Reduced Growth, Early Decline
- ( 9 ) Undetermined Pattern
- ( 8 ) Undetermined - not enough data

Maximum lung growth attained: ( 1 ) Yes ( 0 ) No

Plateau started: ( 2 ) No plateau ( 1 ) Yes ( 0 ) No

Decline started: ( 1 ) Yes ( 0 ) No

AGE AT each of the following periods (use '99' if N/A):

Maximum Lung Growth: \_\_\_\_ . \_\_\_\_

Start of Plateau: \_\_\_\_ . \_\_\_\_

Start of Decline: \_\_\_\_ . \_\_\_\_

### Pre-BD FEV1 Data and Percentiles: 1211

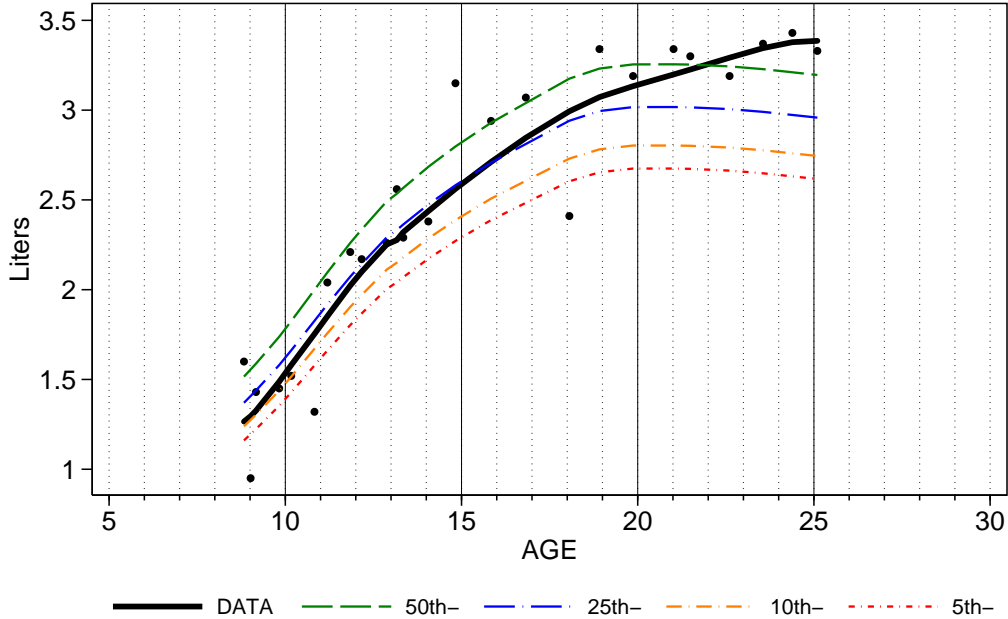

1211

**PATTERN OF GROWTH/DECLINE (Check One)**

- ( 1) Normal Growth
- ( 2) Normal Growth, Early Decline
- ( 3) Reduced Growth
- ( 4) Reduced Growth, Early Decline
- ( 9) Undetermined Pattern
- ( 8) Undetermined - not enough data

Maximum lung growth attained: ( 1) Yes ( 0) No

Plateau started: ( 2) No plateau ( 1) Yes ( 0) No

Decline started: ( 1) Yes ( 0) No

AGE AT each of the following periods (use '99' if N/A):

Maximum Lung Growth: \_\_\_\_ . \_\_\_\_

Start of Plateau: \_\_\_\_ . \_\_\_\_

Start of Decline: \_\_\_\_ . \_\_\_\_

### Pre-BD FEV1 Data and Percentiles: 1219

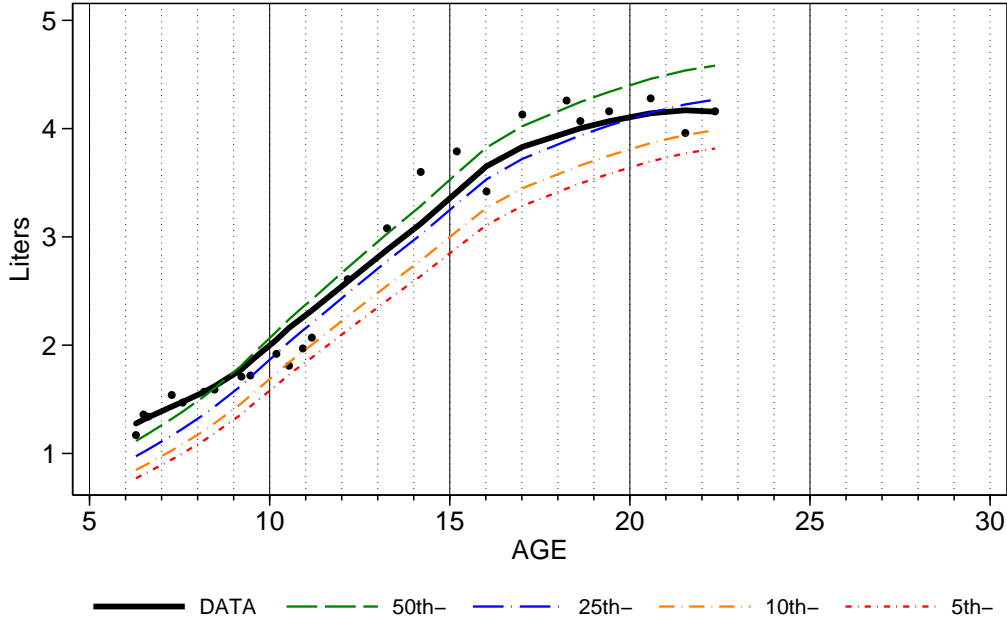

1219

**PATTERN OF GROWTH/DECLINE (Check One)**

- ( 1 ) Normal Growth
- ( 2 ) Normal Growth, Early Decline
- ( 3 ) Reduced Growth
- ( 4 ) Reduced Growth, Early Decline
- ( 9 ) Undetermined Pattern
- ( 8 ) Undetermined - not enough data

Maximum lung growth attained: ( 1 ) Yes ( 0 ) No

Plateau started: ( 2 ) No plateau ( 1 ) Yes ( 0 ) No

Decline started: ( 1 ) Yes ( 0 ) No

AGE AT each of the following periods (use '99' if N/A):

Maximum Lung Growth: \_\_\_\_ . \_\_\_\_

Start of Plateau: \_\_\_\_ . \_\_\_\_

Start of Decline: \_\_\_\_ . \_\_\_\_

### Pre-BD FEV1 Data and Percentiles: 1220

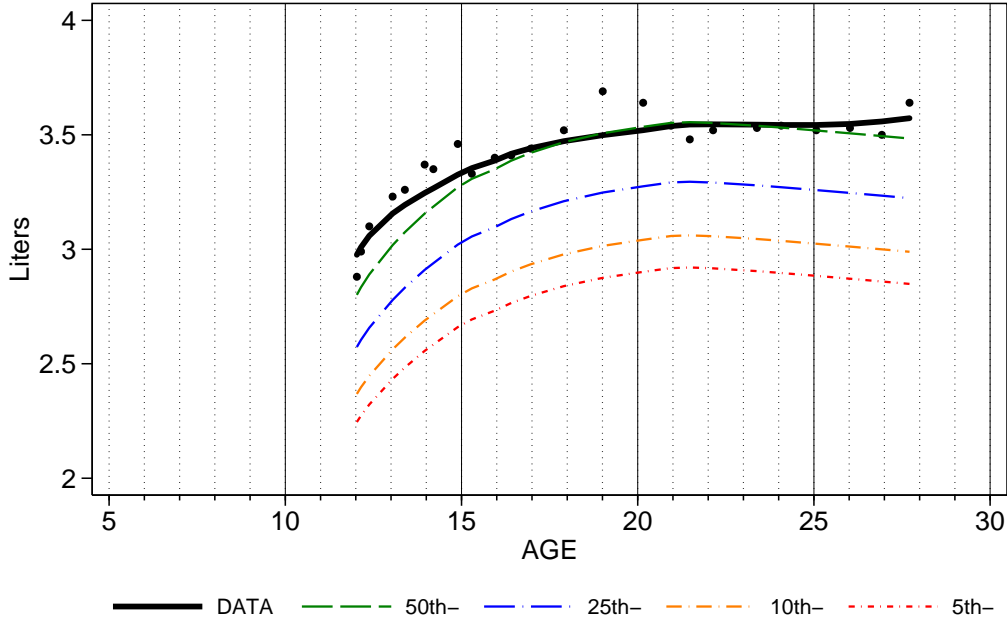

1220

**PATTERN OF GROWTH/DECLINE (Check One)**

- ( 1) Normal Growth
- ( 2) Normal Growth, Early Decline
- ( 3) Reduced Growth
- ( 4) Reduced Growth, Early Decline
- ( 9) Undetermined Pattern
- ( 8) Undetermined - not enough data

Maximum lung growth attained: ( 1) Yes ( 0) No

Plateau started: ( 2) No plateau ( 1) Yes ( 0) No

Decline started: ( 1) Yes ( 0) No

AGE AT each of the following periods (use '99' if N/A):

Maximum Lung Growth: \_\_\_\_ . \_\_\_\_

Start of Plateau: \_\_\_\_ . \_\_\_\_

Start of Decline: \_\_\_\_ . \_\_\_\_



### Pre-BD FEV1 Data and Percentiles: 1224

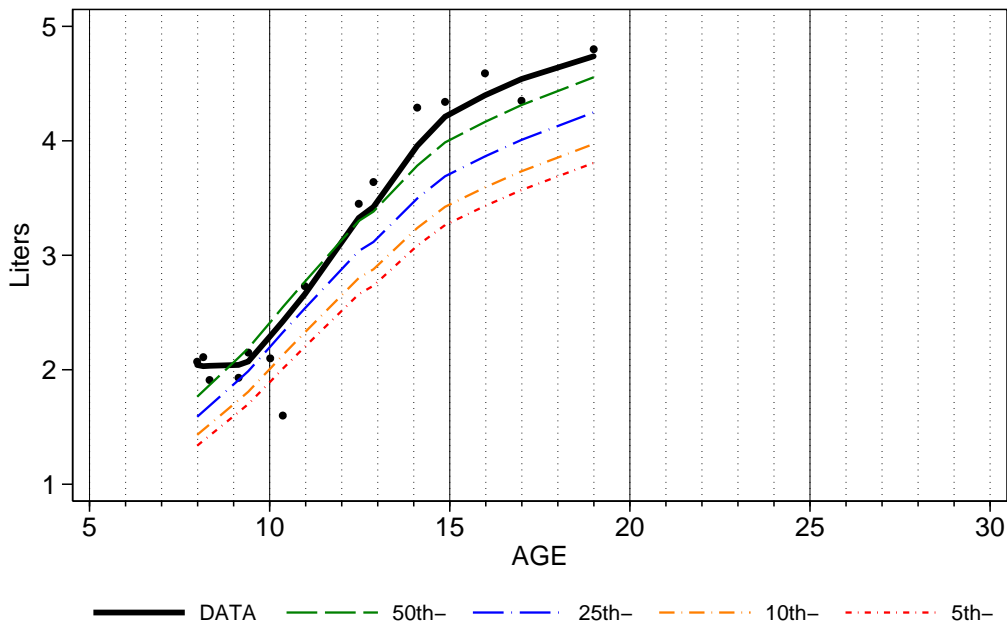

1224

**PATTERN OF GROWTH/DECLINE (Check One)**

- ( 1 ) Normal Growth
- ( 2 ) Normal Growth, Early Decline
- ( 3 ) Reduced Growth
- ( 4 ) Reduced Growth, Early Decline
- ( 9 ) Undetermined Pattern
- ( 8 ) Undetermined - not enough data

Maximum lung growth attained: ( 1 ) Yes ( 0 ) No

Plateau started: ( 2 ) No plateau ( 1 ) Yes ( 0 ) No

Decline started: ( 1 ) Yes ( 0 ) No

AGE AT each of the following periods (use '99' if N/A):

Maximum Lung Growth: \_\_\_\_ . \_\_\_\_

Start of Plateau: \_\_\_\_ . \_\_\_\_

Start of Decline: \_\_\_\_ . \_\_\_\_

### Pre-BD FEV1 Data and Percentiles: 1226

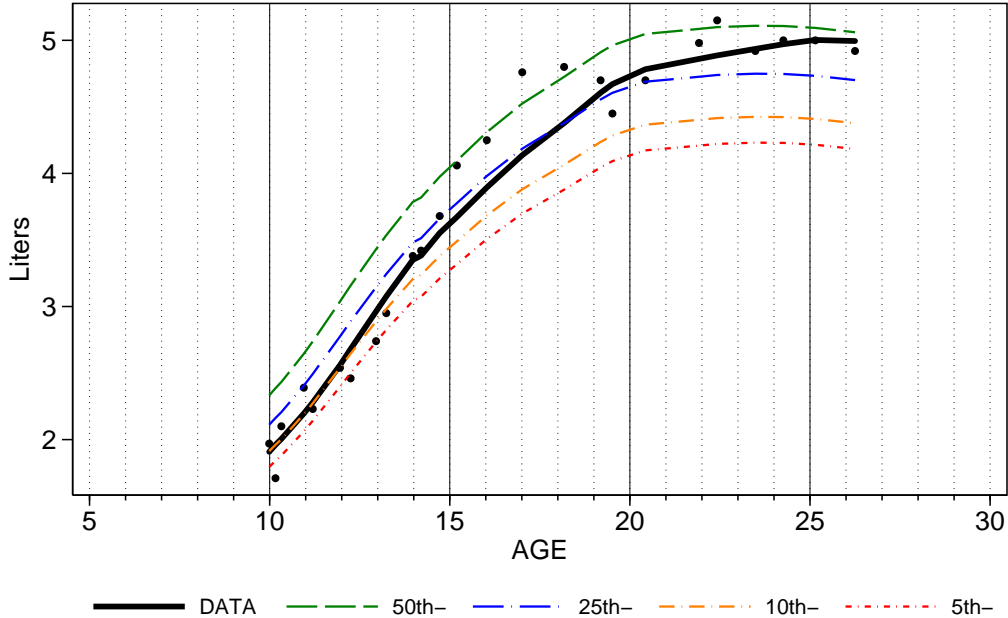

1226

**PATTERN OF GROWTH/DECLINE (Check One)**

- ( 1) Normal Growth
- ( 2) Normal Growth, Early Decline
- ( 3) Reduced Growth
- ( 4) Reduced Growth, Early Decline
- ( 9) Undetermined Pattern
- ( 8) Undetermined - not enough data

Maximum lung growth attained: ( 1) Yes ( 0) No

Plateau started: ( 2) No plateau ( 1) Yes ( 0) No

Decline started: ( 1) Yes ( 0) No

AGE AT each of the following periods (use '99' if N/A):

Maximum Lung Growth: \_\_\_\_ . \_\_\_\_

Start of Plateau: \_\_\_\_ . \_\_\_\_

Start of Decline: \_\_\_\_ . \_\_\_\_

### Pre-BD FEV1 Data and Percentiles: 1239

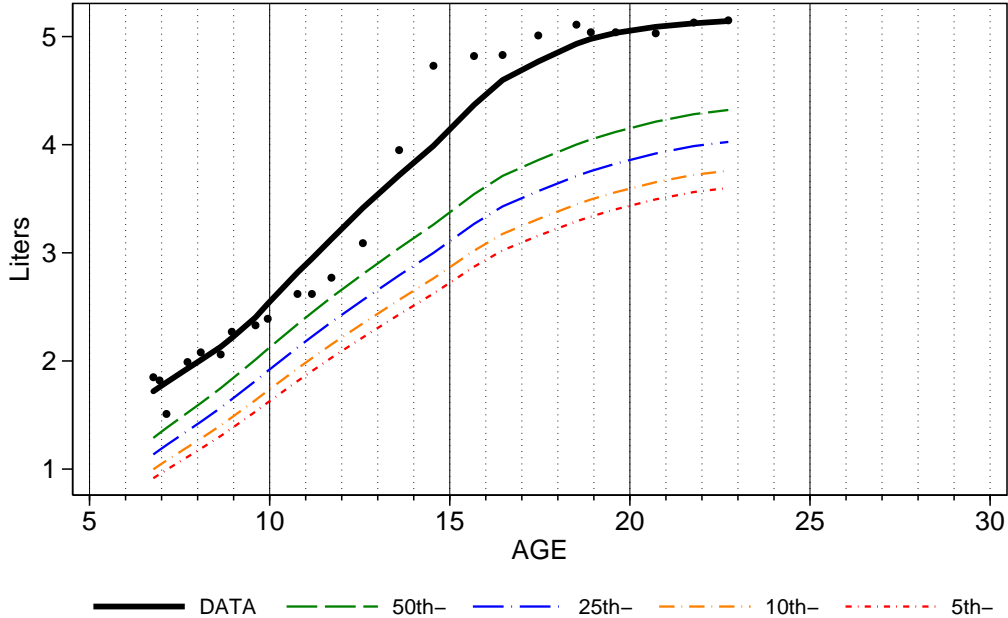

1239

**PATTERN OF GROWTH/DECLINE (Check One)**

- ( 1 ) Normal Growth
- ( 2 ) Normal Growth, Early Decline
- ( 3 ) Reduced Growth
- ( 4 ) Reduced Growth, Early Decline
- ( 9 ) Undetermined Pattern
- ( 8 ) Undetermined - not enough data

Maximum lung growth attained: ( 1 ) Yes ( 0 ) No

Plateau started: ( 2 ) No plateau ( 1 ) Yes ( 0 ) No

Decline started: ( 1 ) Yes ( 0 ) No

AGE AT each of the following periods (use '99' if N/A):

Maximum Lung Growth: \_\_\_\_ . \_\_\_\_

Start of Plateau: \_\_\_\_ . \_\_\_\_

Start of Decline: \_\_\_\_ . \_\_\_\_

### Pre-BD FEV1 Data and Percentiles: 1247

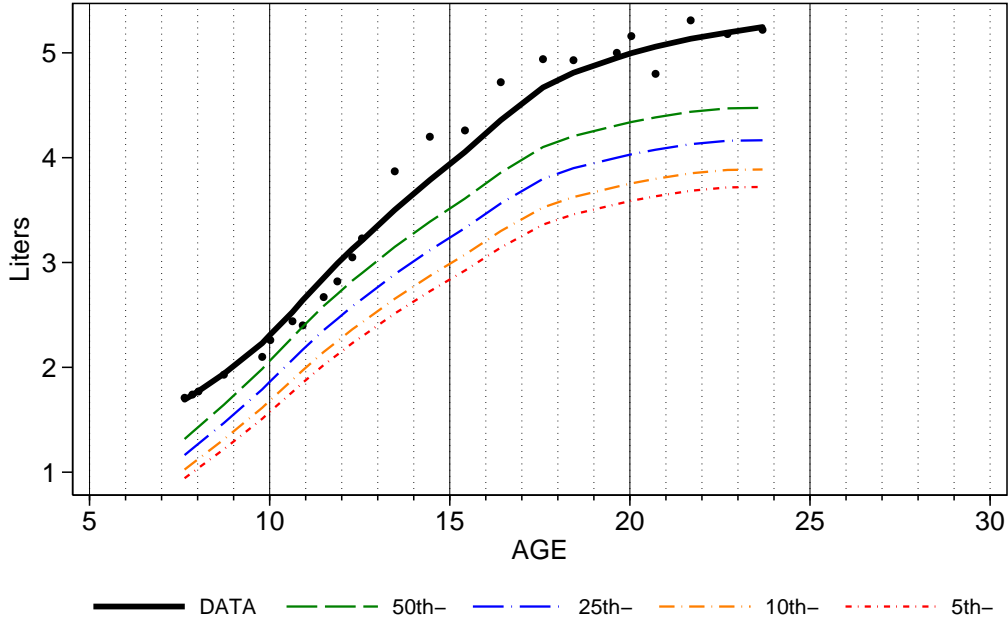

1247

**PATTERN OF GROWTH/DECLINE (Check One)**

- ( 1 ) Normal Growth
- ( 2 ) Normal Growth, Early Decline
- ( 3 ) Reduced Growth
- ( 4 ) Reduced Growth, Early Decline
- ( 9 ) Undetermined Pattern
- ( 8 ) Undetermined - not enough data

Maximum lung growth attained: ( 1 ) Yes ( 0 ) No

Plateau started: ( 2 ) No plateau ( 1 ) Yes ( 0 ) No

Decline started: ( 1 ) Yes ( 0 ) No

AGE AT each of the following periods (use '99' if N/A):

Maximum Lung Growth: \_\_\_\_ . \_\_\_\_

Start of Plateau: \_\_\_\_ . \_\_\_\_

Start of Decline: \_\_\_\_ . \_\_\_\_

### Pre-BD FEV1 Data and Percentiles: 1257

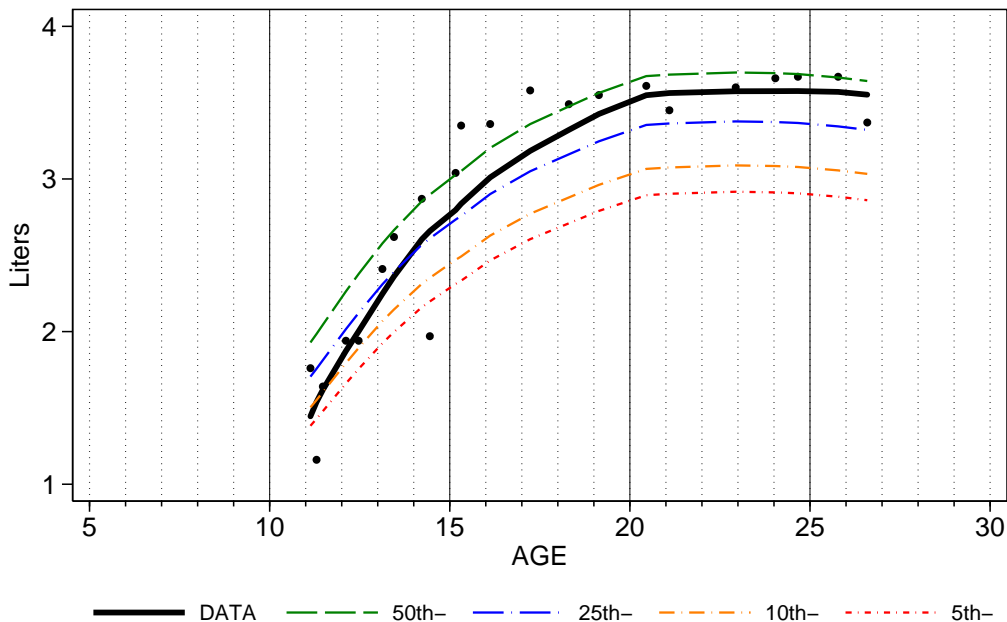

1257

**PATTERN OF GROWTH/DECLINE (Check One)**

- ( 1 ) Normal Growth
- ( 2 ) Normal Growth, Early Decline
- ( 3 ) Reduced Growth
- ( 4 ) Reduced Growth, Early Decline
- ( 9 ) Undetermined Pattern
- ( 8 ) Undetermined - not enough data

Maximum lung growth attained: ( 1 ) Yes ( 0 ) No

Plateau started: ( 2 ) No plateau ( 1 ) Yes ( 0 ) No

Decline started: ( 1 ) Yes ( 0 ) No

AGE AT each of the following periods (use '99' if N/A):

Maximum Lung Growth: \_\_\_\_ . \_\_\_\_

Start of Plateau: \_\_\_\_ . \_\_\_\_

Start of Decline: \_\_\_\_ . \_\_\_\_

### Pre-BD FEV1 Data and Percentiles: 1259

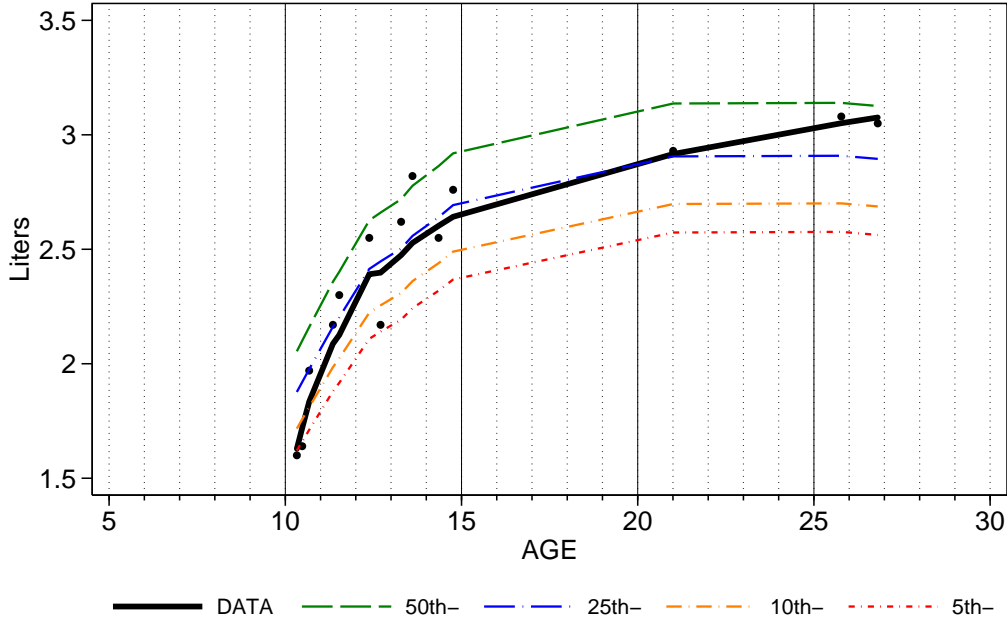

1259

**PATTERN OF GROWTH/DECLINE (Check One)**

- ( 1) Normal Growth
- ( 2) Normal Growth, Early Decline
- ( 3) Reduced Growth
- ( 4) Reduced Growth, Early Decline
- ( 9) Undetermined Pattern
- ( 8) Undetermined - not enough data

Maximum lung growth attained: ( 1) Yes ( 0) No

Plateau started: ( 2) No plateau ( 1) Yes ( 0) No

Decline started: ( 1) Yes ( 0) No

AGE AT each of the following periods (use '99' if N/A):

Maximum Lung Growth: \_\_\_\_ . \_\_\_\_

Start of Plateau: \_\_\_\_ . \_\_\_\_

Start of Decline: \_\_\_\_ . \_\_\_\_

### Pre-BD FEV1 Data and Percentiles: 1260

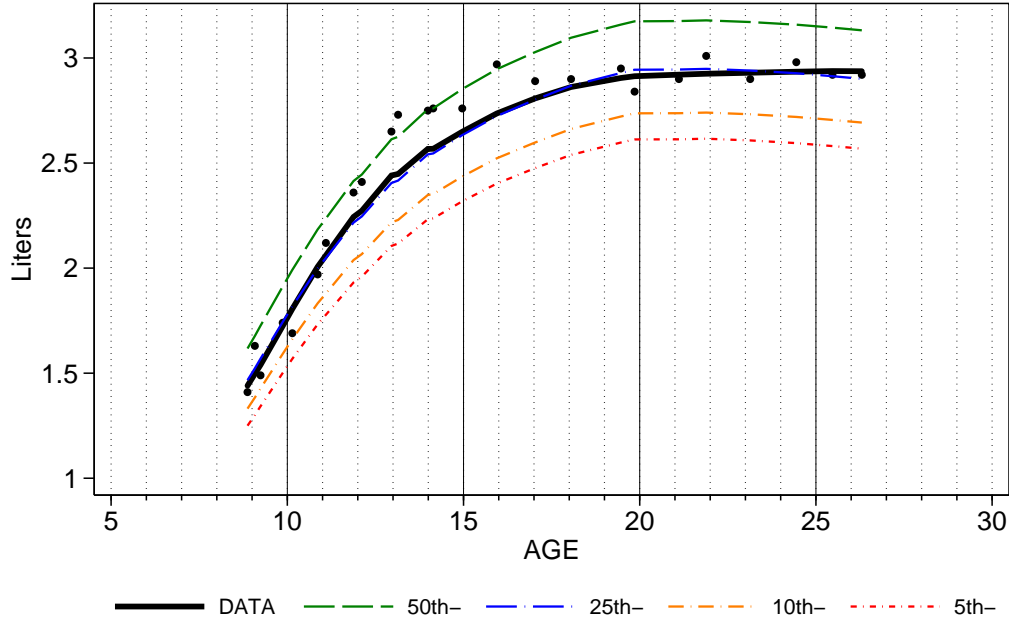

1260

**PATTERN OF GROWTH/DECLINE (Check One)**

- ( 1 ) Normal Growth
- ( 2 ) Normal Growth, Early Decline
- ( 3 ) Reduced Growth
- ( 4 ) Reduced Growth, Early Decline
- ( 9 ) Undetermined Pattern
- ( 8 ) Undetermined - not enough data

Maximum lung growth attained: ( 1 ) Yes ( 0 ) No

Plateau started: ( 2 ) No plateau ( 1 ) Yes ( 0 ) No

Decline started: ( 1 ) Yes ( 0 ) No

AGE AT each of the following periods (use '99' if N/A):

Maximum Lung Growth: \_\_\_\_ . \_\_\_\_

Start of Plateau: \_\_\_\_ . \_\_\_\_

Start of Decline: \_\_\_\_ . \_\_\_\_

### Pre-BD FEV1 Data and Percentiles: 1268

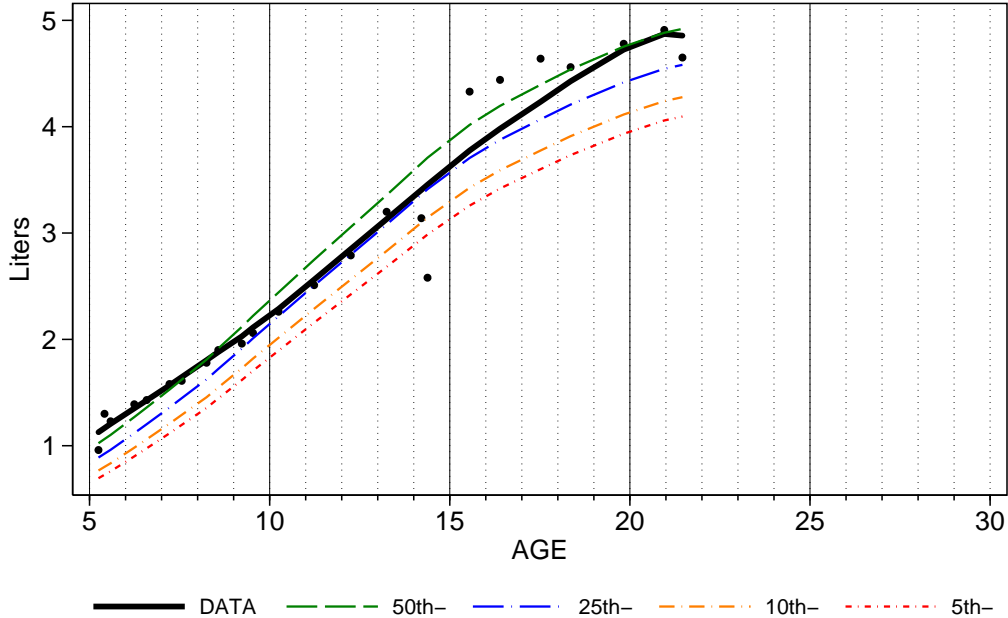

1268

**PATTERN OF GROWTH/DECLINE (Check One)**

- ( 1 ) Normal Growth
- ( 2 ) Normal Growth, Early Decline
- ( 3 ) Reduced Growth
- ( 4 ) Reduced Growth, Early Decline
- ( 9 ) Undetermined Pattern
- ( 8 ) Undetermined - not enough data

Maximum lung growth attained: ( 1 ) Yes ( 0 ) No

Plateau started: ( 2 ) No plateau ( 1 ) Yes ( 0 ) No

Decline started: ( 1 ) Yes ( 0 ) No

AGE AT each of the following periods (use '99' if N/A):

Maximum Lung Growth: \_\_\_\_ . \_\_\_\_

Start of Plateau: \_\_\_\_ . \_\_\_\_

Start of Decline: \_\_\_\_ . \_\_\_\_



### Pre-BD FEV1 Data and Percentiles: 1269

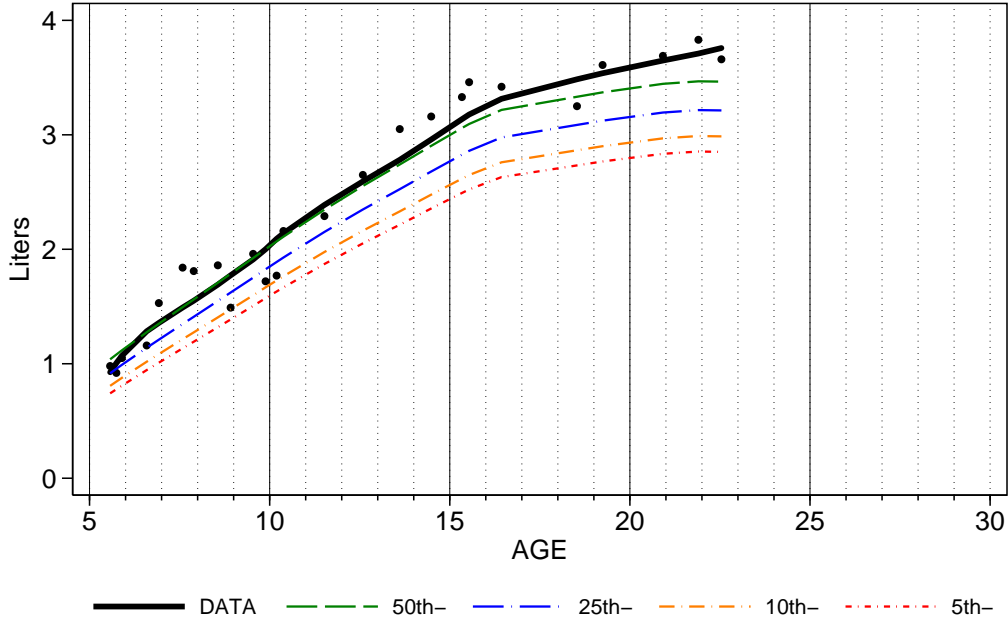

1269

**PATTERN OF GROWTH/DECLINE (Check One)**

- ( 1 ) Normal Growth
- ( 2 ) Normal Growth, Early Decline
- ( 3 ) Reduced Growth
- ( 4 ) Reduced Growth, Early Decline
- ( 9 ) Undetermined Pattern
- ( 8 ) Undetermined - not enough data

Maximum lung growth attained: ( 1 ) Yes ( 0 ) No

Plateau started: ( 2 ) No plateau ( 1 ) Yes ( 0 ) No

Decline started: ( 1 ) Yes ( 0 ) No

AGE AT each of the following periods (use '99' if N/A):

Maximum Lung Growth: \_\_\_\_ . \_\_\_\_

Start of Plateau: \_\_\_\_ . \_\_\_\_

Start of Decline: \_\_\_\_ . \_\_\_\_

### Pre-BD FEV1 Data and Percentiles: 1272

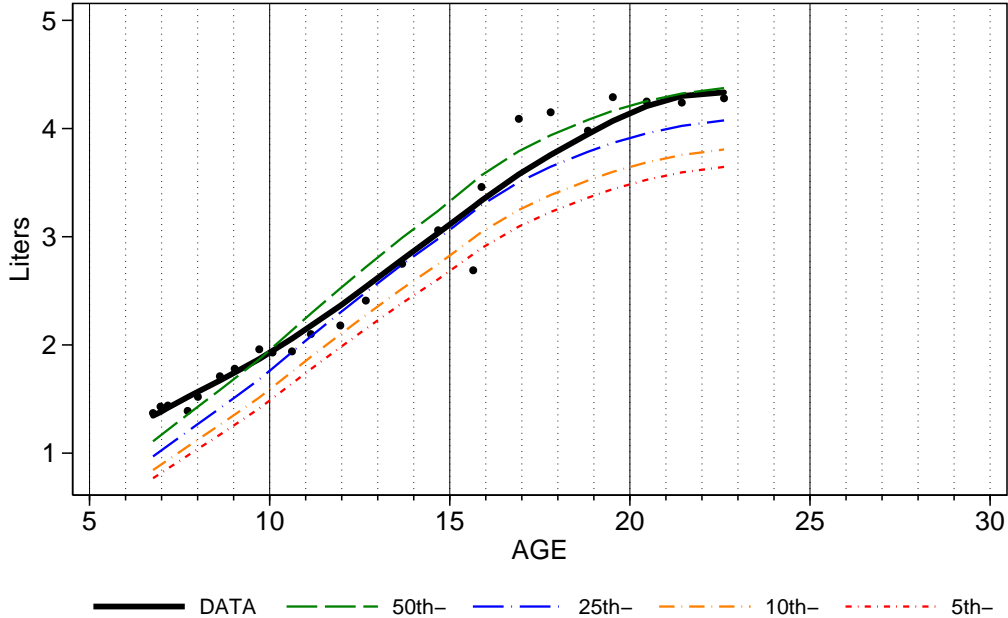

1272

**PATTERN OF GROWTH/DECLINE (Check One)**

- ( 1) Normal Growth
- ( 2) Normal Growth, Early Decline
- ( 3) Reduced Growth
- ( 4) Reduced Growth, Early Decline
- ( 9) Undetermined Pattern
- ( 8) Undetermined - not enough data

Maximum lung growth attained: ( 1) Yes ( 0) No

Plateau started: ( 2) No plateau ( 1) Yes ( 0) No

Decline started: ( 1) Yes ( 0) No

AGE AT each of the following periods (use '99' if N/A):

Maximum Lung Growth: \_\_\_\_ . \_\_\_\_

Start of Plateau: \_\_\_\_ . \_\_\_\_

Start of Decline: \_\_\_\_ . \_\_\_\_

### Pre-BD FEV1 Data and Percentiles: 1282

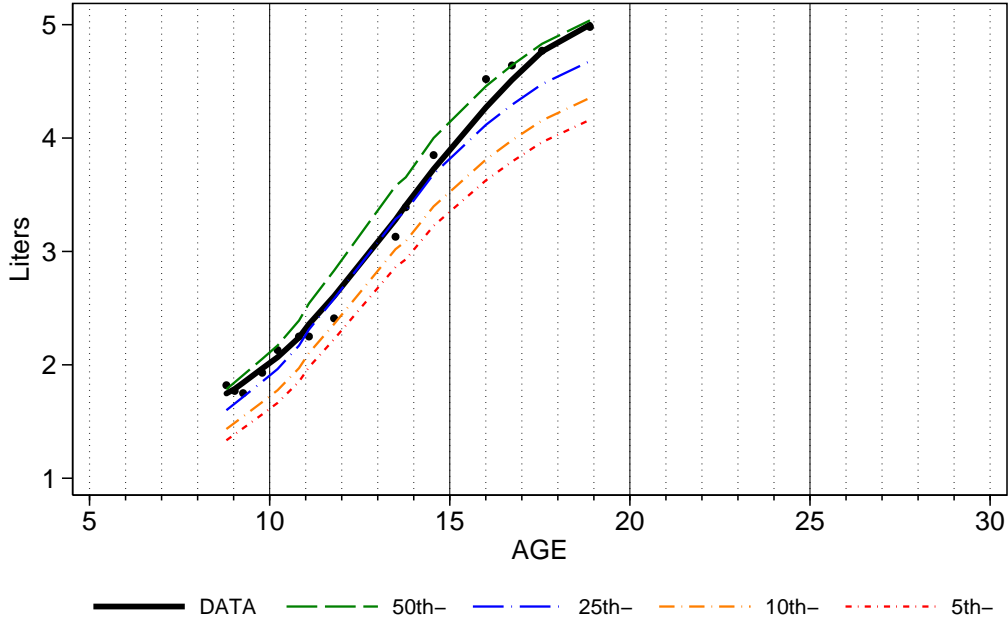

1282

**PATTERN OF GROWTH/DECLINE (Check One)**

- ( 1 ) Normal Growth
- ( 2 ) Normal Growth, Early Decline
- ( 3 ) Reduced Growth
- ( 4 ) Reduced Growth, Early Decline
- ( 9 ) Undetermined Pattern
- ( 8 ) Undetermined - not enough data

Maximum lung growth attained: ( 1 ) Yes ( 0 ) No

Plateau started: ( 2 ) No plateau ( 1 ) Yes ( 0 ) No

Decline started: ( 1 ) Yes ( 0 ) No

AGE AT each of the following periods (use '99' if N/A):

Maximum Lung Growth: \_\_\_\_ . \_\_\_\_

Start of Plateau: \_\_\_\_ . \_\_\_\_

Start of Decline: \_\_\_\_ . \_\_\_\_

### Pre-BD FEV1 Data and Percentiles: 1288

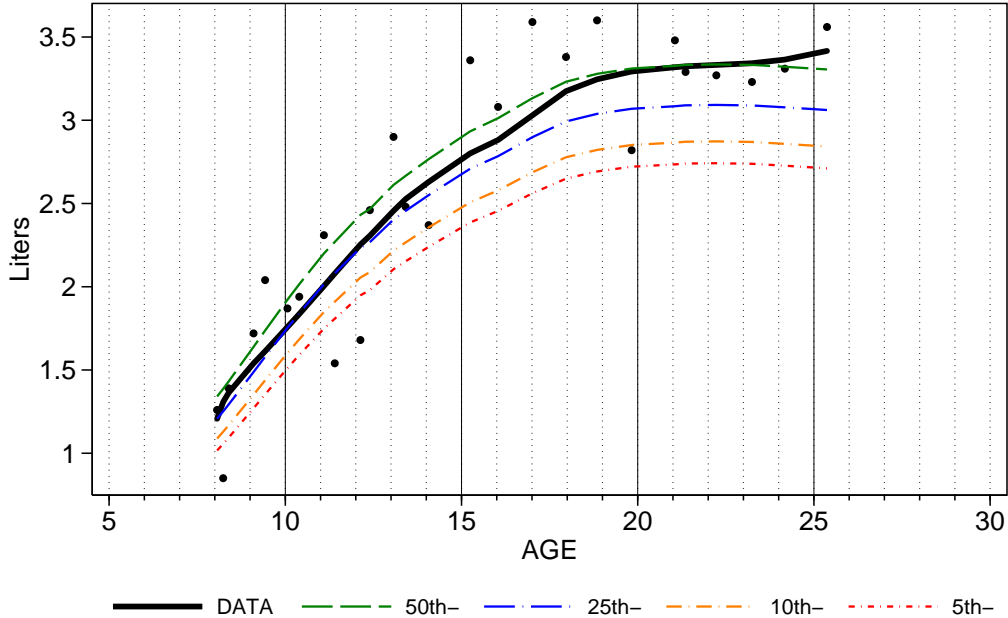

1288

**PATTERN OF GROWTH/DECLINE (Check One)**

- ( 1) Normal Growth
- ( 2) Normal Growth, Early Decline
- ( 3) Reduced Growth
- ( 4) Reduced Growth, Early Decline
- ( 9) Undetermined Pattern
- ( 8) Undetermined - not enough data

Maximum lung growth attained: ( 1) Yes ( 0) No

Plateau started: ( 2) No plateau ( 1) Yes ( 0) No

Decline started: ( 1) Yes ( 0) No

AGE AT each of the following periods (use '99' if N/A):

Maximum Lung Growth: \_\_\_\_ . \_\_\_\_

Start of Plateau: \_\_\_\_ . \_\_\_\_

Start of Decline: \_\_\_\_ . \_\_\_\_

### Pre-BD FEV1 Data and Percentiles: 1292

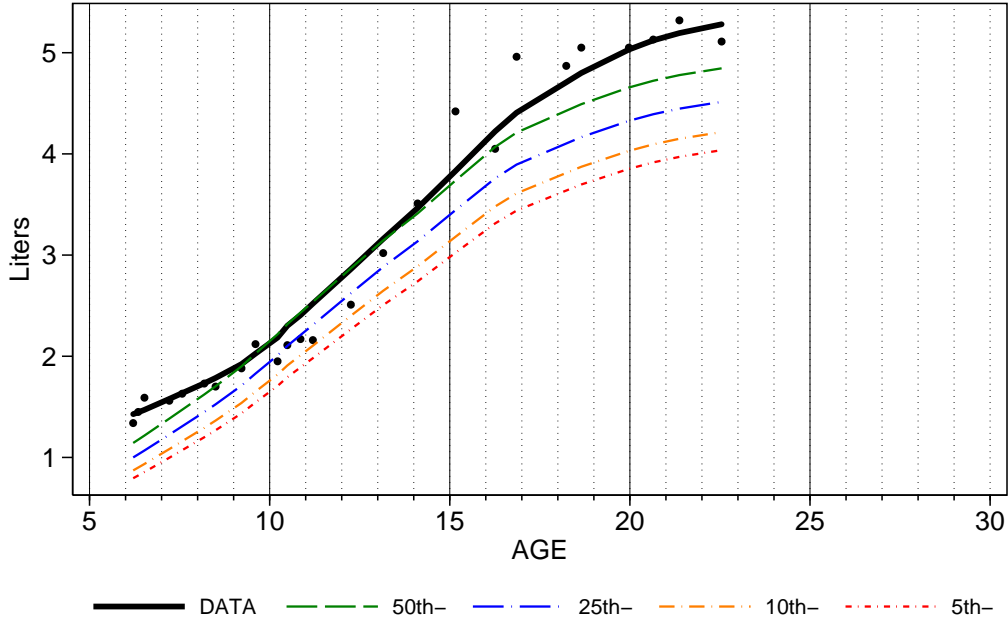

1292

**PATTERN OF GROWTH/DECLINE (Check One)**

- ( 1) Normal Growth
- ( 2) Normal Growth, Early Decline
- ( 3) Reduced Growth
- ( 4) Reduced Growth, Early Decline
- ( 9) Undetermined Pattern
- ( 8) Undetermined - not enough data

Maximum lung growth attained: ( 1) Yes ( 0) No

Plateau started: ( 2) No plateau ( 1) Yes ( 0) No

Decline started: ( 1) Yes ( 0) No

AGE AT each of the following periods (use '99' if N/A):

Maximum Lung Growth: \_\_\_\_ . \_\_\_\_

Start of Plateau: \_\_\_\_ . \_\_\_\_

Start of Decline: \_\_\_\_ . \_\_\_\_

### Pre-BD FEV1 Data and Percentiles: 1294

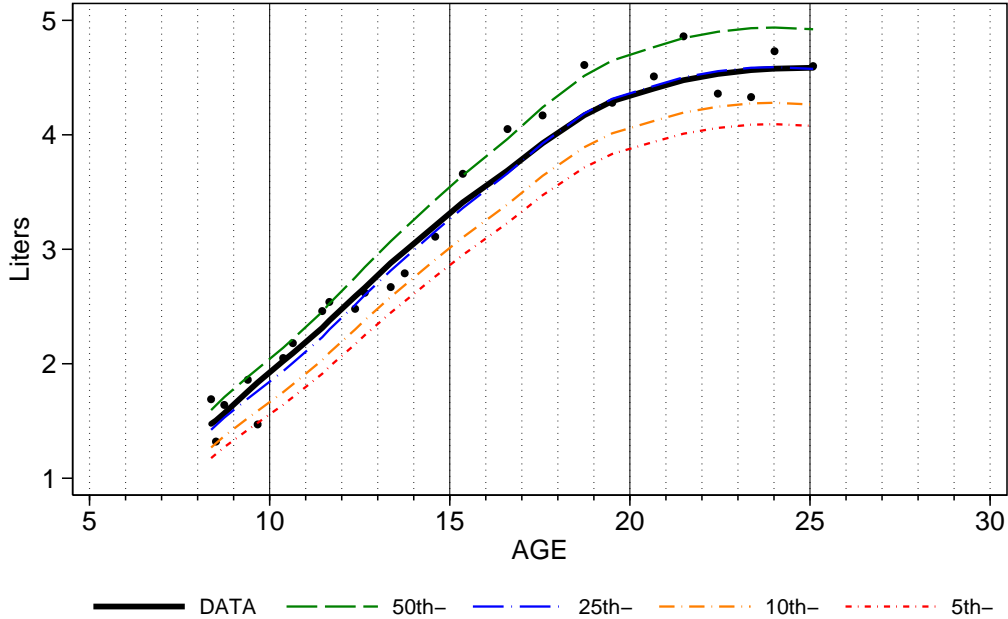

1294

**PATTERN OF GROWTH/DECLINE (Check One)**

- ( 1 ) Normal Growth
- ( 2 ) Normal Growth, Early Decline
- ( 3 ) Reduced Growth
- ( 4 ) Reduced Growth, Early Decline
- ( 9 ) Undetermined Pattern
- ( 8 ) Undetermined - not enough data

Maximum lung growth attained: ( 1 ) Yes ( 0 ) No

Plateau started: ( 2 ) No plateau ( 1 ) Yes ( 0 ) No

Decline started: ( 1 ) Yes ( 0 ) No

AGE AT each of the following periods (use '99' if N/A):

Maximum Lung Growth: \_\_\_\_ . \_\_\_\_

Start of Plateau: \_\_\_\_ . \_\_\_\_

Start of Decline: \_\_\_\_ . \_\_\_\_

### Pre-BD FEV1 Data and Percentiles: 1295

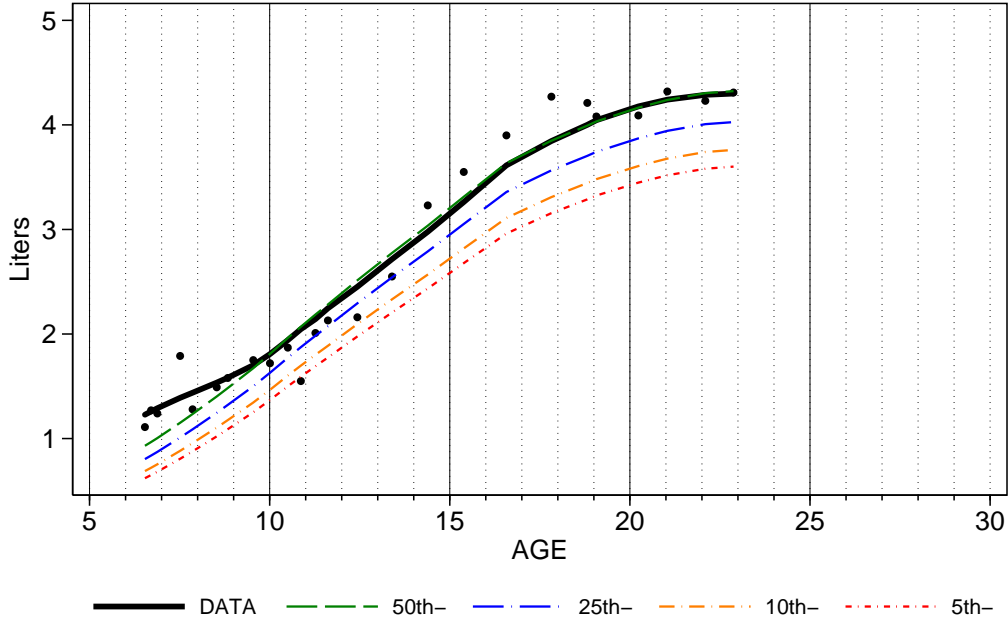

1295

**PATTERN OF GROWTH/DECLINE (Check One)**

- ( 1) Normal Growth
- ( 2) Normal Growth, Early Decline
- ( 3) Reduced Growth
- ( 4) Reduced Growth, Early Decline
- ( 9) Undetermined Pattern
- ( 8) Undetermined - not enough data

Maximum lung growth attained: ( 1) Yes ( 0) No

Plateau started: ( 2) No plateau ( 1) Yes ( 0) No

Decline started: ( 1) Yes ( 0) No

AGE AT each of the following periods (use '99' if N/A):

Maximum Lung Growth: \_\_\_\_ . \_\_\_\_

Start of Plateau: \_\_\_\_ . \_\_\_\_

Start of Decline: \_\_\_\_ . \_\_\_\_

### Pre-BD FEV1 Data and Percentiles: 1298

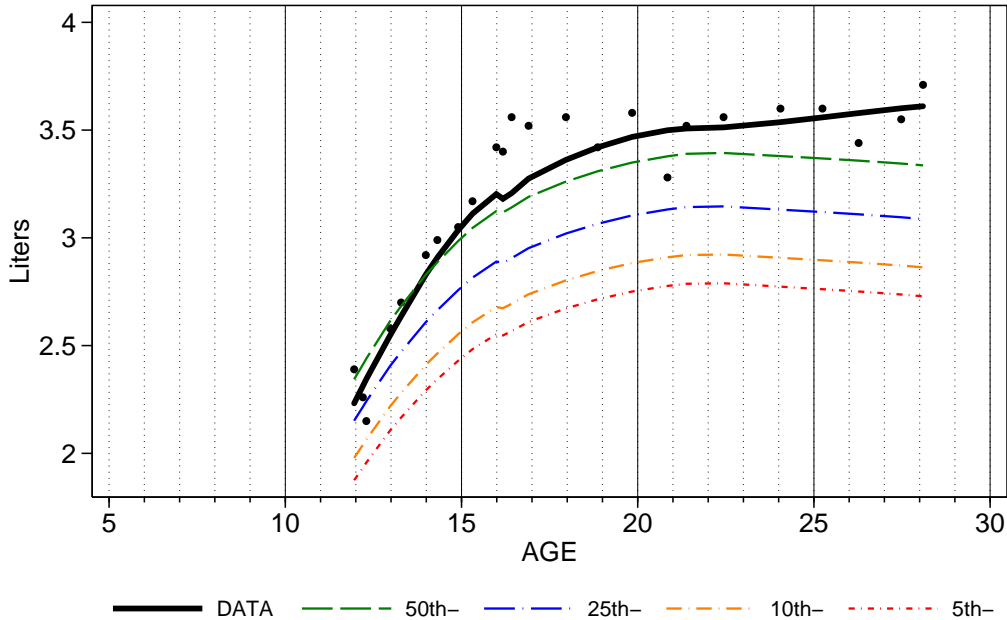

1298

**PATTERN OF GROWTH/DECLINE (Check One)**

- ( 1) Normal Growth
- ( 2) Normal Growth, Early Decline
- ( 3) Reduced Growth
- ( 4) Reduced Growth, Early Decline
- ( 9) Undetermined Pattern
- ( 8) Undetermined - not enough data

Maximum lung growth attained: ( 1) Yes ( 0) No

Plateau started: ( 2) No plateau ( 1) Yes ( 0) No

Decline started: ( 1) Yes ( 0) No

AGE AT each of the following periods (use '99' if N/A):

Maximum Lung Growth: \_\_\_\_ . \_\_\_\_

Start of Plateau: \_\_\_\_ . \_\_\_\_

Start of Decline: \_\_\_\_ . \_\_\_\_



### Pre-BD FEV1 Data and Percentiles: 1300

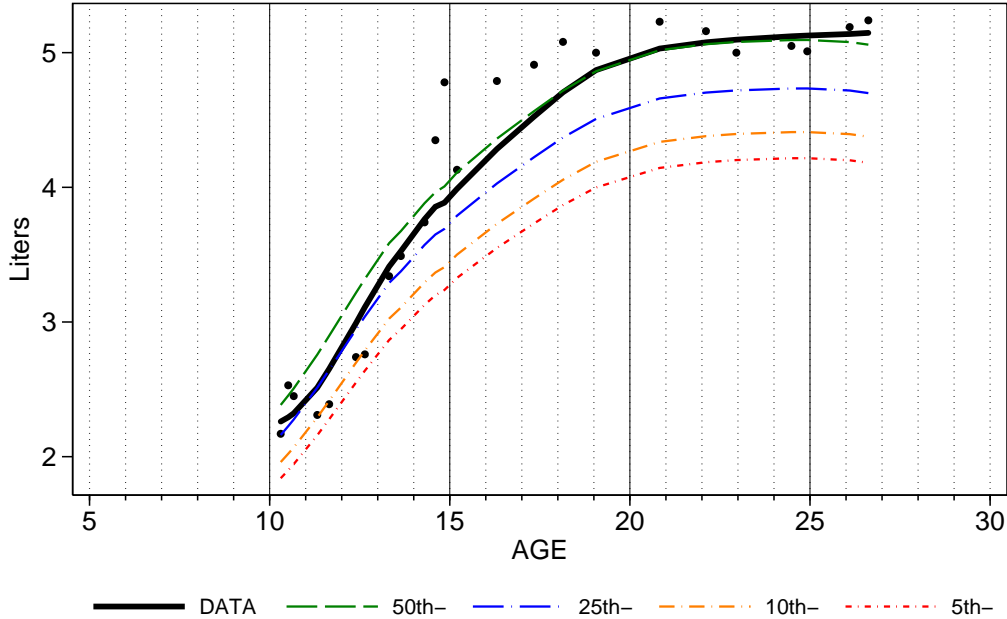

1300

**PATTERN OF GROWTH/DECLINE (Check One)**

- ( 1) Normal Growth
- ( 2) Normal Growth, Early Decline
- ( 3) Reduced Growth
- ( 4) Reduced Growth, Early Decline
- ( 9) Undetermined Pattern
- ( 8) Undetermined - not enough data

Maximum lung growth attained: ( 1) Yes ( 0) No

Plateau started: ( 2) No plateau ( 1) Yes ( 0) No

Decline started: ( 1) Yes ( 0) No

AGE AT each of the following periods (use '99' if N/A):

Maximum Lung Growth: \_\_\_\_ . \_\_\_\_

Start of Plateau: \_\_\_\_ . \_\_\_\_

Start of Decline: \_\_\_\_ . \_\_\_\_

### Pre-BD FEV1 Data and Percentiles: 1310

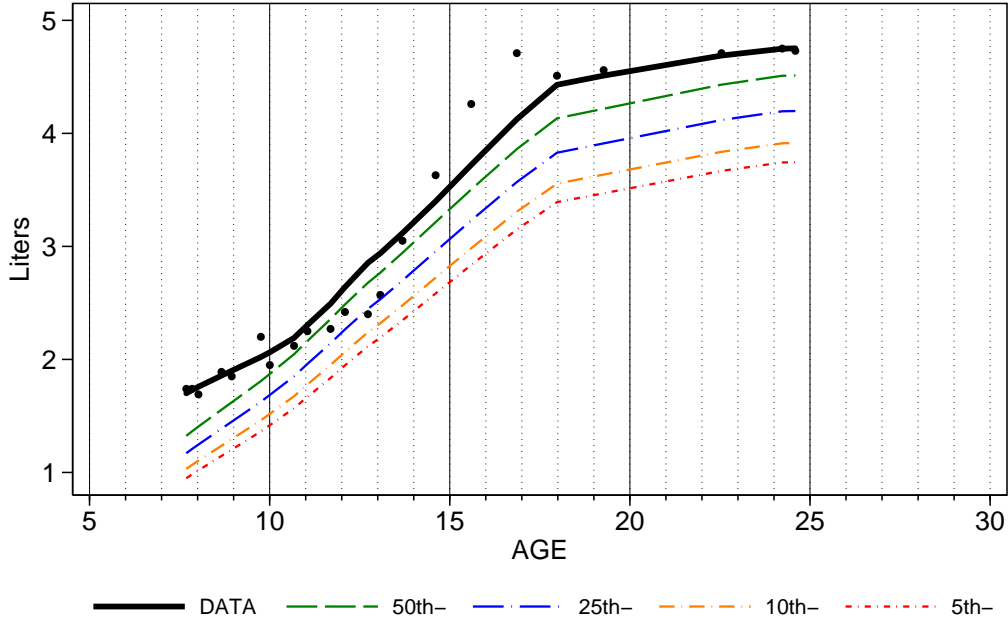

1310

**PATTERN OF GROWTH/DECLINE (Check One)**

- ( 1) Normal Growth
- ( 2) Normal Growth, Early Decline
- ( 3) Reduced Growth
- ( 4) Reduced Growth, Early Decline
- ( 9) Undetermined Pattern
- ( 8) Undetermined - not enough data

Maximum lung growth attained: ( 1) Yes ( 0) No

Plateau started: ( 2) No plateau ( 1) Yes ( 0) No

Decline started: ( 1) Yes ( 0) No

AGE AT each of the following periods (use '99' if N/A):

Maximum Lung Growth: \_\_\_\_ . \_\_\_\_

Start of Plateau: \_\_\_\_ . \_\_\_\_

Start of Decline: \_\_\_\_ . \_\_\_\_

### Pre-BD FEV1 Data and Percentiles: 1312

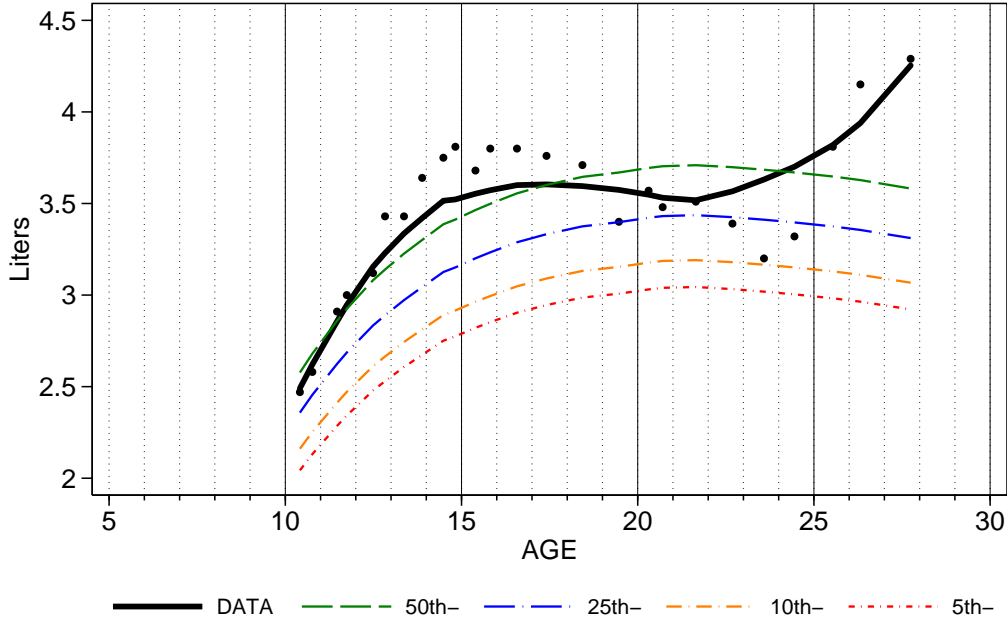

1312

**PATTERN OF GROWTH/DECLINE (Check One)**

- ( 1) Normal Growth
- ( 2) Normal Growth, Early Decline
- ( 3) Reduced Growth
- ( 4) Reduced Growth, Early Decline
- ( 9) Undetermined Pattern
- ( 8) Undetermined - not enough data

Maximum lung growth attained: ( 1) Yes ( 0) No

Plateau started: ( 2) No plateau ( 1) Yes ( 0) No

Decline started: ( 1) Yes ( 0) No

AGE AT each of the following periods (use '99' if N/A):

Maximum Lung Growth: \_\_\_\_ . \_\_\_\_

Start of Plateau: \_\_\_\_ . \_\_\_\_

Start of Decline: \_\_\_\_ . \_\_\_\_

### Pre-BD FEV1 Data and Percentiles: 1314

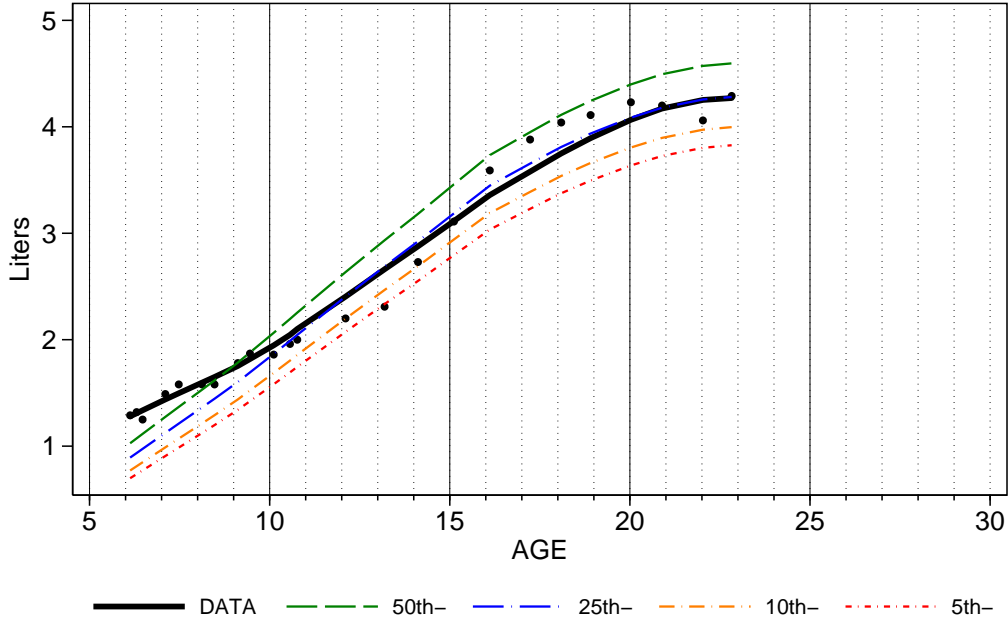

1314

**PATTERN OF GROWTH/DECLINE (Check One)**

- ( 1 ) Normal Growth
- ( 2 ) Normal Growth, Early Decline
- ( 3 ) Reduced Growth
- ( 4 ) Reduced Growth, Early Decline
- ( 9 ) Undetermined Pattern
- ( 8 ) Undetermined - not enough data

Maximum lung growth attained: ( 1 ) Yes ( 0 ) No

Plateau started: ( 2 ) No plateau ( 1 ) Yes ( 0 ) No

Decline started: ( 1 ) Yes ( 0 ) No

AGE AT each of the following periods (use '99' if N/A):

Maximum Lung Growth: \_\_\_\_ . \_\_\_\_

Start of Plateau: \_\_\_\_ . \_\_\_\_

Start of Decline: \_\_\_\_ . \_\_\_\_

### Pre-BD FEV1 Data and Percentiles: 1315

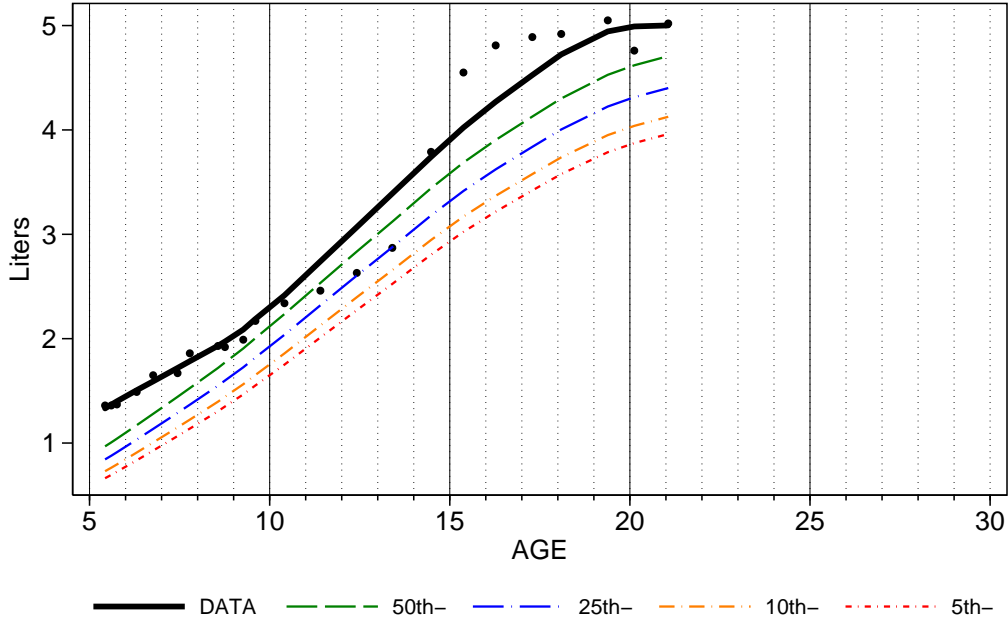

1315

**PATTERN OF GROWTH/DECLINE (Check One)**

- ( 1 ) Normal Growth
- ( 2 ) Normal Growth, Early Decline
- ( 3 ) Reduced Growth
- ( 4 ) Reduced Growth, Early Decline
- ( 9 ) Undetermined Pattern
- ( 8 ) Undetermined - not enough data

Maximum lung growth attained: ( 1 ) Yes ( 0 ) No

Plateau started: ( 2 ) No plateau ( 1 ) Yes ( 0 ) No

Decline started: ( 1 ) Yes ( 0 ) No

AGE AT each of the following periods (use '99' if N/A):

Maximum Lung Growth: \_\_\_\_ . \_\_\_\_

Start of Plateau: \_\_\_\_ . \_\_\_\_

Start of Decline: \_\_\_\_ . \_\_\_\_

### Pre-BD FEV1 Data and Percentiles: 1317

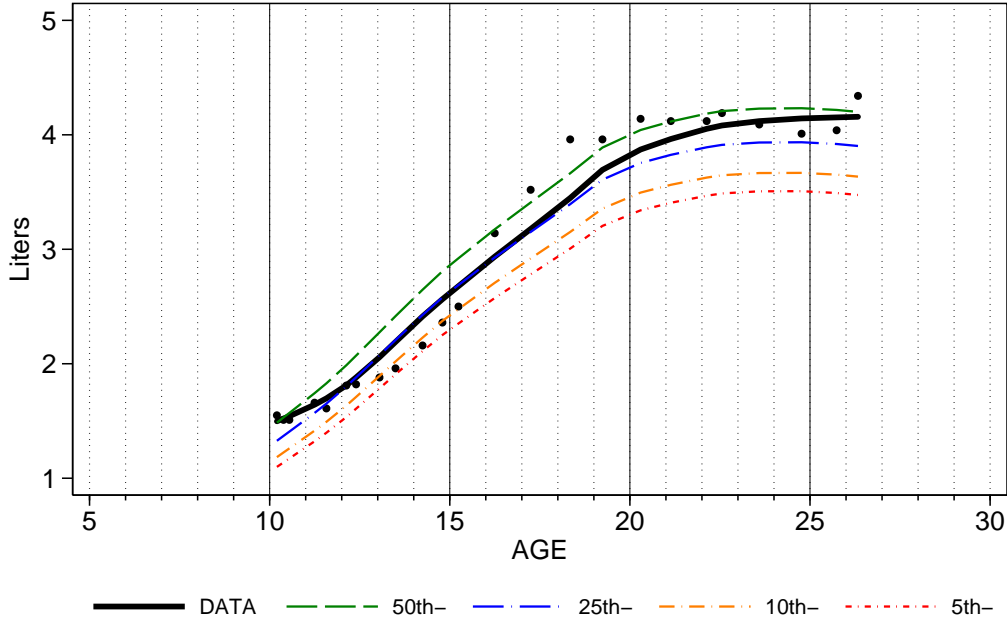

1317

**PATTERN OF GROWTH/DECLINE (Check One)**

- ( 1 ) Normal Growth
- ( 2 ) Normal Growth, Early Decline
- ( 3 ) Reduced Growth
- ( 4 ) Reduced Growth, Early Decline
- ( 9 ) Undetermined Pattern
- ( 8 ) Undetermined - not enough data

Maximum lung growth attained: ( 1 ) Yes ( 0 ) No

Plateau started: ( 2 ) No plateau ( 1 ) Yes ( 0 ) No

Decline started: ( 1 ) Yes ( 0 ) No

AGE AT each of the following periods (use '99' if N/A):

Maximum Lung Growth: \_\_\_\_ . \_\_\_\_

Start of Plateau: \_\_\_\_ . \_\_\_\_

Start of Decline: \_\_\_\_ . \_\_\_\_

### Pre-BD FEV1 Data and Percentiles: 1318

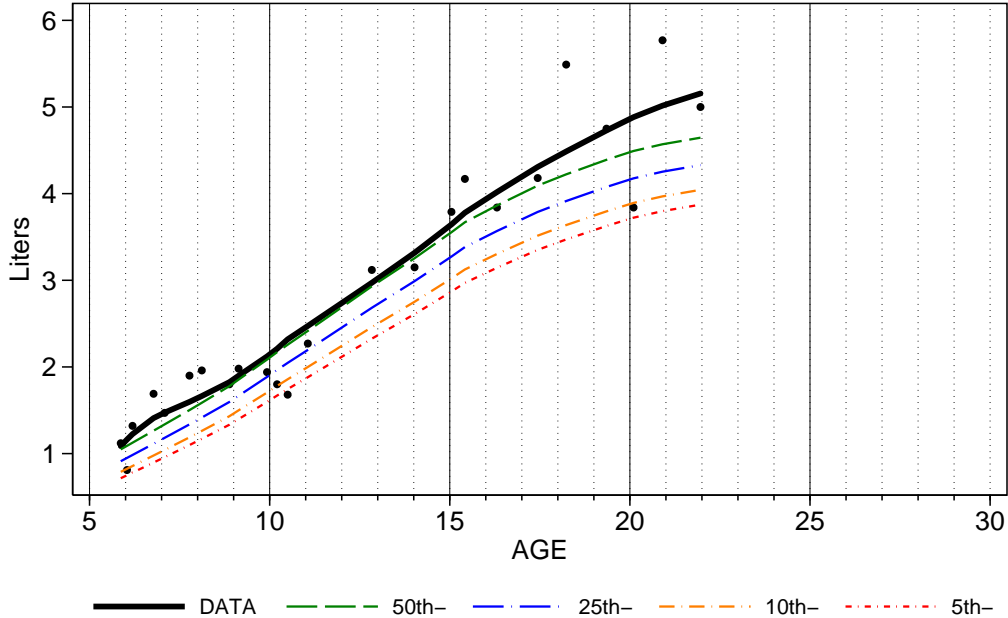

1318

**PATTERN OF GROWTH/DECLINE (Check One)**

- ( 1 ) Normal Growth
- ( 2 ) Normal Growth, Early Decline
- ( 3 ) Reduced Growth
- ( 4 ) Reduced Growth, Early Decline
- ( 9 ) Undetermined Pattern
- ( 8 ) Undetermined - not enough data

Maximum lung growth attained: ( 1 ) Yes ( 0 ) No

Plateau started: ( 2 ) No plateau ( 1 ) Yes ( 0 ) No

Decline started: ( 1 ) Yes ( 0 ) No

AGE AT each of the following periods (use '99' if N/A):

Maximum Lung Growth: \_\_\_\_ . \_\_\_\_

Start of Plateau: \_\_\_\_ . \_\_\_\_

Start of Decline: \_\_\_\_ . \_\_\_\_

### Pre-BD FEV1 Data and Percentiles: 1319

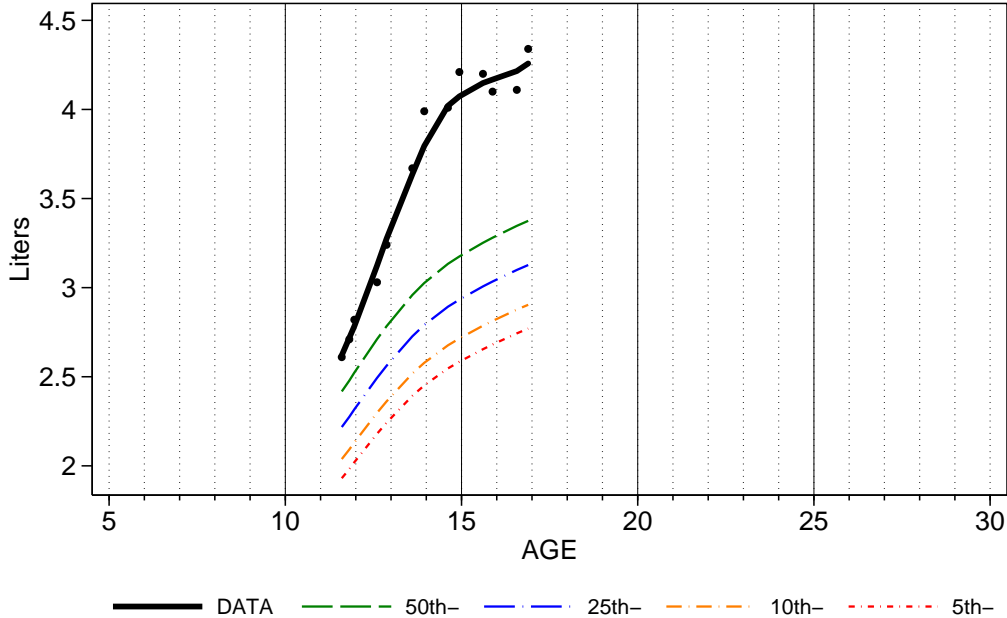

1319

**PATTERN OF GROWTH/DECLINE (Check One)**

- ( 1) Normal Growth
- ( 2) Normal Growth, Early Decline
- ( 3) Reduced Growth
- ( 4) Reduced Growth, Early Decline
- ( 9) Undetermined Pattern
- ( 8) Undetermined - not enough data

Maximum lung growth attained: ( 1) Yes ( 0) No

Plateau started: ( 2) No plateau ( 1) Yes ( 0) No

Decline started: ( 1) Yes ( 0) No

AGE AT each of the following periods (use '99' if N/A):

Maximum Lung Growth: \_\_\_\_ . \_\_\_\_

Start of Plateau: \_\_\_\_ . \_\_\_\_

Start of Decline: \_\_\_\_ . \_\_\_\_



### Pre-BD FEV1 Data and Percentiles: 1323

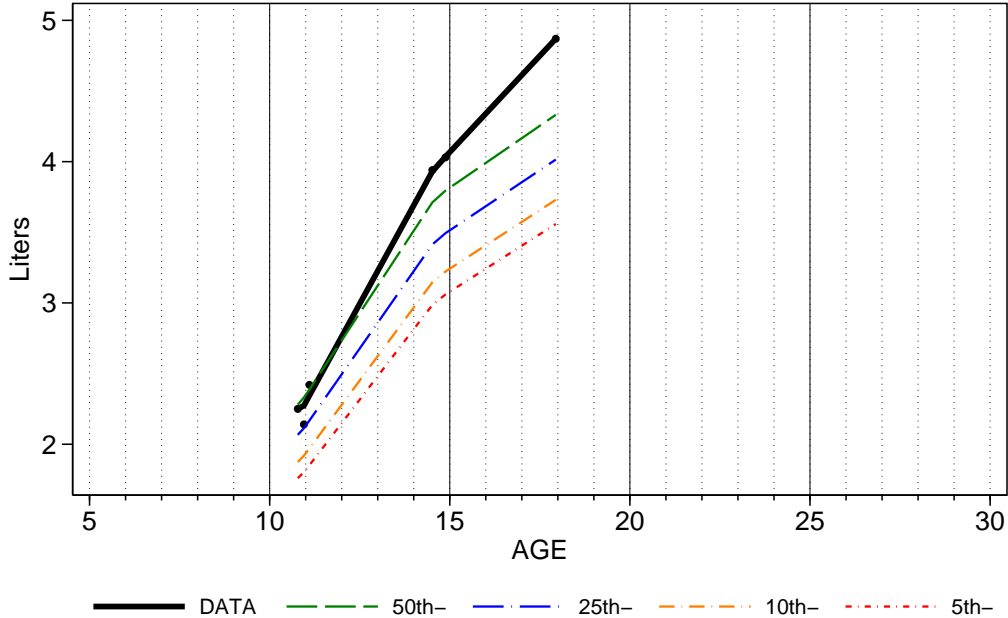

1323

**PATTERN OF GROWTH/DECLINE (Check One)**

- ( 1) Normal Growth
- ( 2) Normal Growth, Early Decline
- ( 3) Reduced Growth
- ( 4) Reduced Growth, Early Decline
- ( 9) Undetermined Pattern
- ( 8) Undetermined - not enough data

Maximum lung growth attained: ( 1) Yes ( 0) No

Plateau started: ( 2) No plateau ( 1) Yes ( 0) No

Decline started: ( 1) Yes ( 0) No

AGE AT each of the following periods (use '99' if N/A):

Maximum Lung Growth: \_\_\_\_ . \_\_\_\_

Start of Plateau: \_\_\_\_ . \_\_\_\_

Start of Decline: \_\_\_\_ . \_\_\_\_

### Pre-BD FEV1 Data and Percentiles: 1325

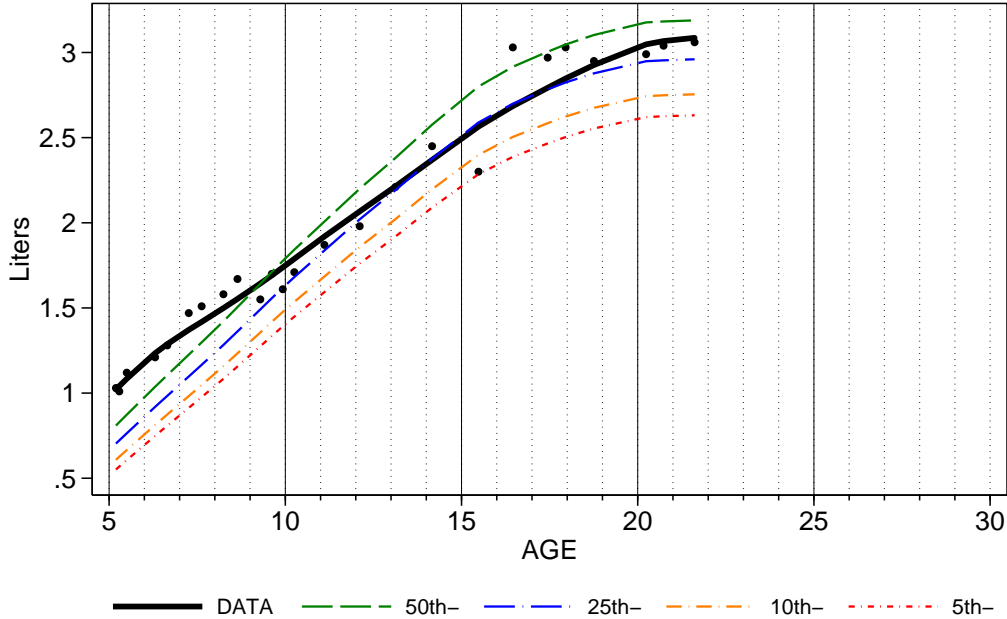

1325

**PATTERN OF GROWTH/DECLINE (Check One)**

- ( 1) Normal Growth
- ( 2) Normal Growth, Early Decline
- ( 3) Reduced Growth
- ( 4) Reduced Growth, Early Decline
- ( 9) Undetermined Pattern
- ( 8) Undetermined - not enough data

Maximum lung growth attained: ( 1) Yes ( 0) No

Plateau started: ( 2) No plateau ( 1) Yes ( 0) No

Decline started: ( 1) Yes ( 0) No

AGE AT each of the following periods (use '99' if N/A):

Maximum Lung Growth: \_\_\_\_ . \_\_\_\_

Start of Plateau: \_\_\_\_ . \_\_\_\_

Start of Decline: \_\_\_\_ . \_\_\_\_

### Pre-BD FEV1 Data and Percentiles: 1326

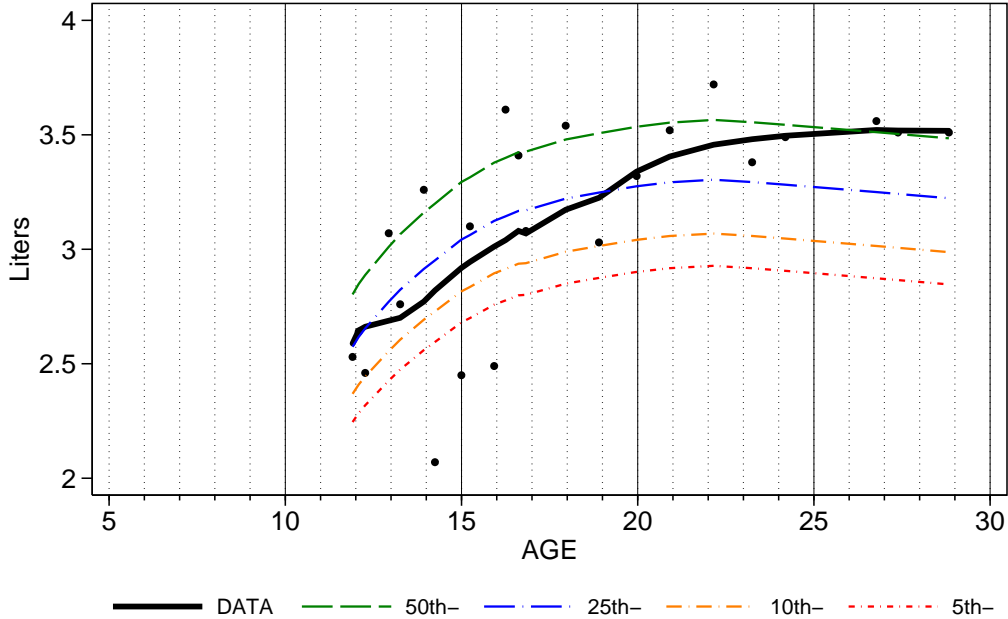

1326

**PATTERN OF GROWTH/DECLINE (Check One)**

- ( 1) Normal Growth
- ( 2) Normal Growth, Early Decline
- ( 3) Reduced Growth
- ( 4) Reduced Growth, Early Decline
- ( 9) Undetermined Pattern
- ( 8) Undetermined - not enough data

Maximum lung growth attained: ( 1) Yes ( 0) No

Plateau started: ( 2) No plateau ( 1) Yes ( 0) No

Decline started: ( 1) Yes ( 0) No

AGE AT each of the following periods (use '99' if N/A):

Maximum Lung Growth: \_\_\_\_ . \_\_\_\_

Start of Plateau: \_\_\_\_ . \_\_\_\_

Start of Decline: \_\_\_\_ . \_\_\_\_

### Pre-BD FEV1 Data and Percentiles: 1329

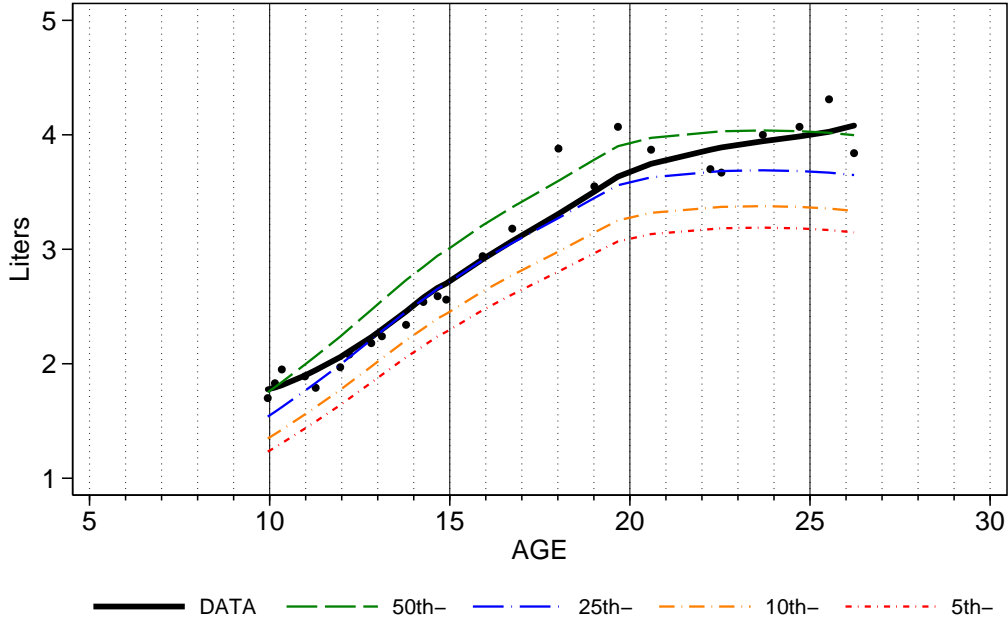

1329

**PATTERN OF GROWTH/DECLINE (Check One)**

- ( 1) Normal Growth
- ( 2) Normal Growth, Early Decline
- ( 3) Reduced Growth
- ( 4) Reduced Growth, Early Decline
- ( 9) Undetermined Pattern
- ( 8) Undetermined - not enough data

Maximum lung growth attained: ( 1) Yes ( 0) No

Plateau started: ( 2) No plateau ( 1) Yes ( 0) No

Decline started: ( 1) Yes ( 0) No

AGE AT each of the following periods (use '99' if N/A):

Maximum Lung Growth: \_\_\_\_ . \_\_\_\_

Start of Plateau: \_\_\_\_ . \_\_\_\_

Start of Decline: \_\_\_\_ . \_\_\_\_

### Pre-BD FEV1 Data and Percentiles: 1331

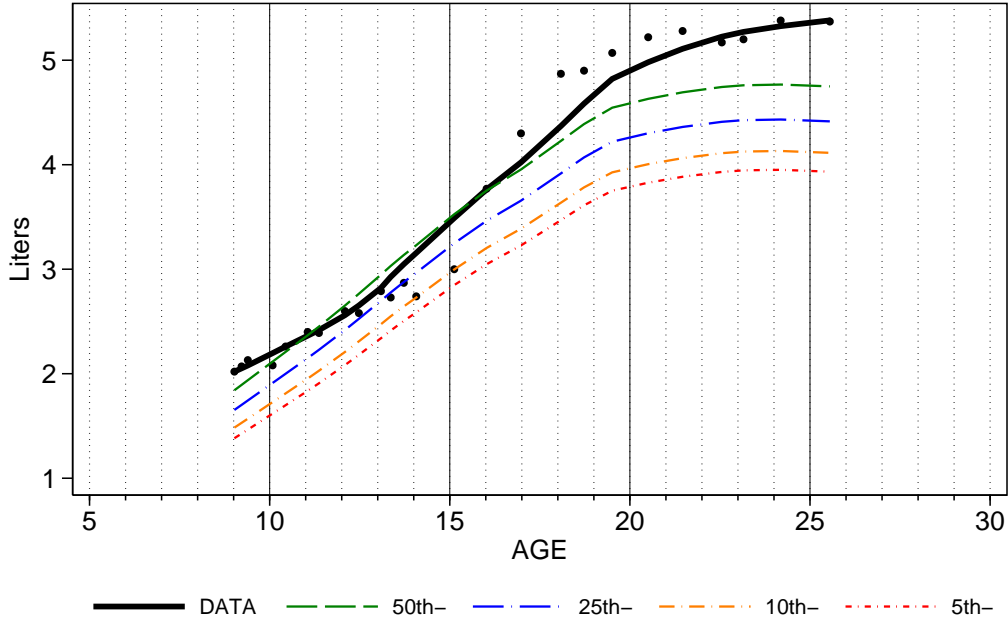

1331

**PATTERN OF GROWTH/DECLINE (Check One)**

- ( 1 ) Normal Growth
- ( 2 ) Normal Growth, Early Decline
- ( 3 ) Reduced Growth
- ( 4 ) Reduced Growth, Early Decline
- ( 9 ) Undetermined Pattern
- ( 8 ) Undetermined - not enough data

Maximum lung growth attained: ( 1 ) Yes ( 0 ) No

Plateau started: ( 2 ) No plateau ( 1 ) Yes ( 0 ) No

Decline started: ( 1 ) Yes ( 0 ) No

AGE AT each of the following periods (use '99' if N/A):

Maximum Lung Growth: \_\_\_\_ . \_\_\_\_

Start of Plateau: \_\_\_\_ . \_\_\_\_

Start of Decline: \_\_\_\_ . \_\_\_\_

### Pre-BD FEV1 Data and Percentiles: 1333

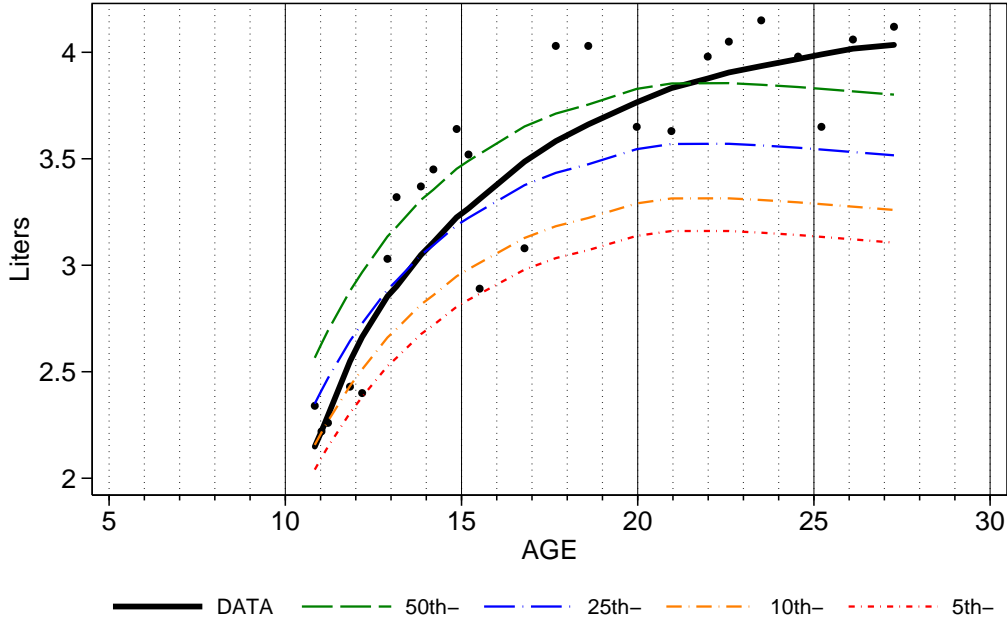

1333

**PATTERN OF GROWTH/DECLINE (Check One)**

- ( 1 ) Normal Growth
- ( 2 ) Normal Growth, Early Decline
- ( 3 ) Reduced Growth
- ( 4 ) Reduced Growth, Early Decline
- ( 9 ) Undetermined Pattern
- ( 8 ) Undetermined - not enough data

Maximum lung growth attained: ( 1 ) Yes ( 0 ) No

Plateau started: ( 2 ) No plateau ( 1 ) Yes ( 0 ) No

Decline started: ( 1 ) Yes ( 0 ) No

AGE AT each of the following periods (use '99' if N/A):

Maximum Lung Growth: \_\_\_\_ . \_\_\_\_

Start of Plateau: \_\_\_\_ . \_\_\_\_

Start of Decline: \_\_\_\_ . \_\_\_\_

### Pre-BD FEV1 Data and Percentiles: 1336

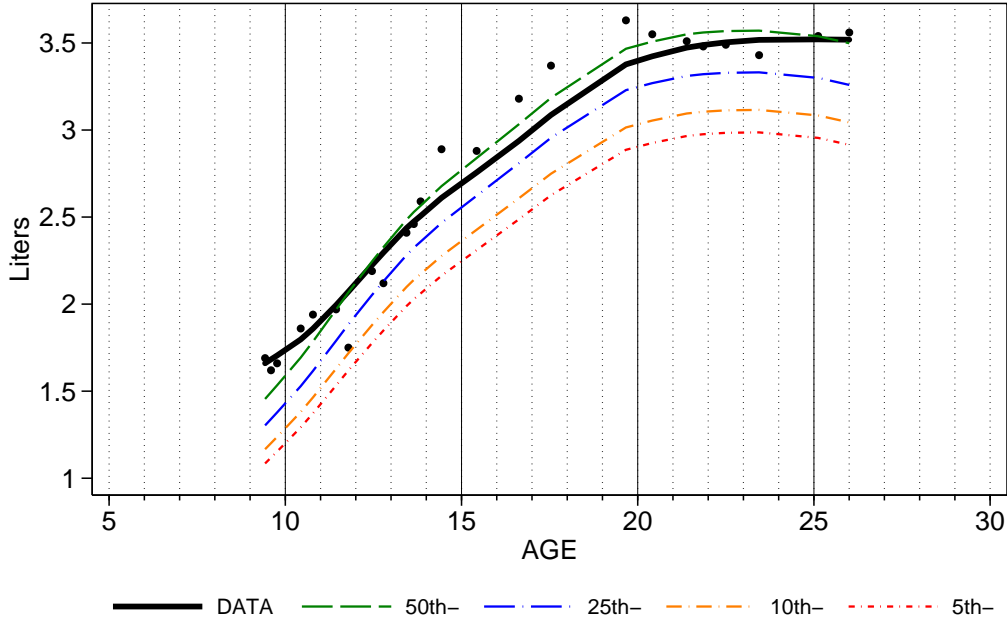

1336

**PATTERN OF GROWTH/DECLINE (Check One)**

- ( 1 ) Normal Growth
- ( 2 ) Normal Growth, Early Decline
- ( 3 ) Reduced Growth
- ( 4 ) Reduced Growth, Early Decline
- ( 9 ) Undetermined Pattern
- ( 8 ) Undetermined - not enough data

Maximum lung growth attained: ( 1 ) Yes ( 0 ) No

Plateau started: ( 2 ) No plateau ( 1 ) Yes ( 0 ) No

Decline started: ( 1 ) Yes ( 0 ) No

AGE AT each of the following periods (use '99' if N/A):

Maximum Lung Growth: \_\_\_\_ . \_\_\_\_

Start of Plateau: \_\_\_\_ . \_\_\_\_

Start of Decline: \_\_\_\_ . \_\_\_\_

### Pre-BD FEV1 Data and Percentiles: 1339

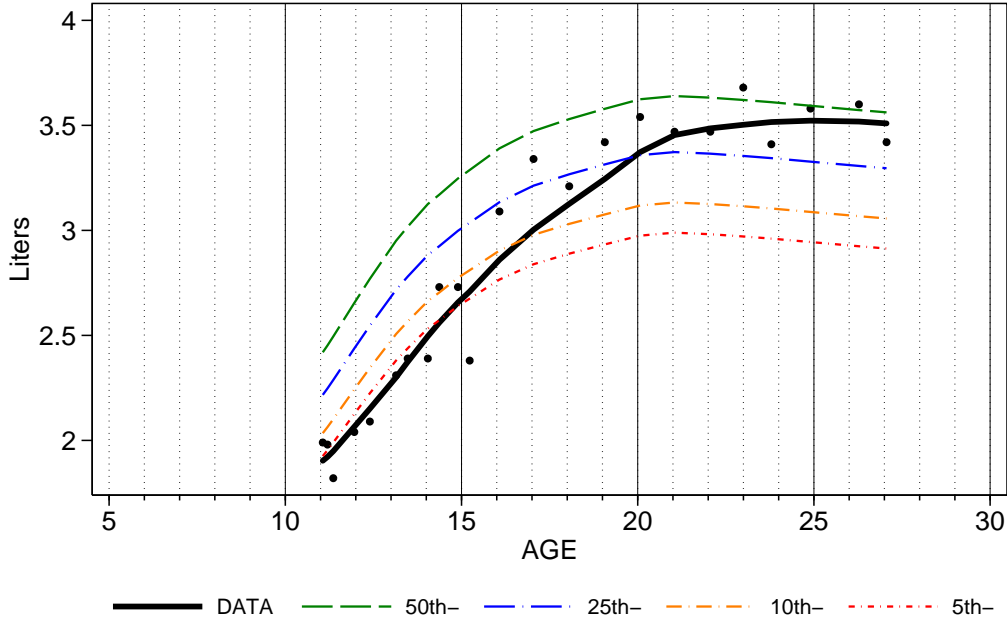

1339

**PATTERN OF GROWTH/DECLINE (Check One)**

- ( 1 ) Normal Growth
- ( 2 ) Normal Growth, Early Decline
- ( 3 ) Reduced Growth
- ( 4 ) Reduced Growth, Early Decline
- ( 9 ) Undetermined Pattern
- ( 8 ) Undetermined - not enough data

Maximum lung growth attained: ( 1 ) Yes ( 0 ) No

Plateau started: ( 2 ) No plateau ( 1 ) Yes ( 0 ) No

Decline started: ( 1 ) Yes ( 0 ) No

AGE AT each of the following periods (use '99' if N/A):

Maximum Lung Growth: \_\_\_\_ . \_\_\_\_

Start of Plateau: \_\_\_\_ . \_\_\_\_

Start of Decline: \_\_\_\_ . \_\_\_\_



### Pre-BD FEV1 Data and Percentiles: 1340

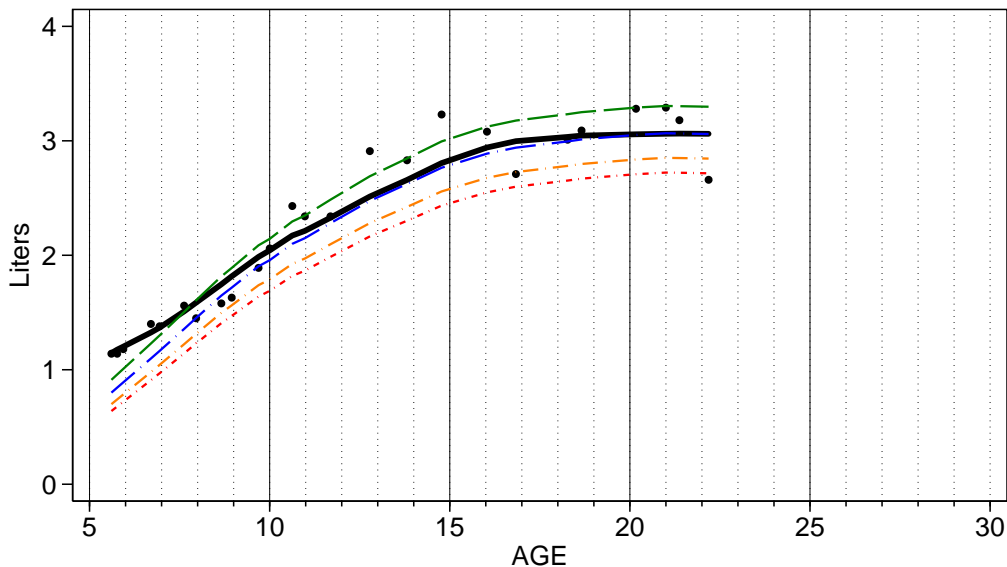

DATA  
  50th-  
  25th-  
  10th-  
  5th-

1340

**PATTERN OF GROWTH/DECLINE (Check One)**

- ( 1 ) Normal Growth
- ( 2 ) Normal Growth, Early Decline
- ( 3 ) Reduced Growth
- ( 4 ) Reduced Growth, Early Decline
- ( 9 ) Undetermined Pattern
- ( 8 ) Undetermined - not enough data

Maximum lung growth attained: ( 1 ) Yes ( 0 ) No

Plateau started: ( 2 ) No plateau ( 1 ) Yes ( 0 ) No

Decline started: ( 1 ) Yes ( 0 ) No

AGE AT each of the following periods (use '99' if N/A):

Maximum Lung Growth: \_\_\_\_ . \_\_\_\_

Start of Plateau: \_\_\_\_ . \_\_\_\_

Start of Decline: \_\_\_\_ . \_\_\_\_

### Pre-BD FEV1 Data and Percentiles: 1350

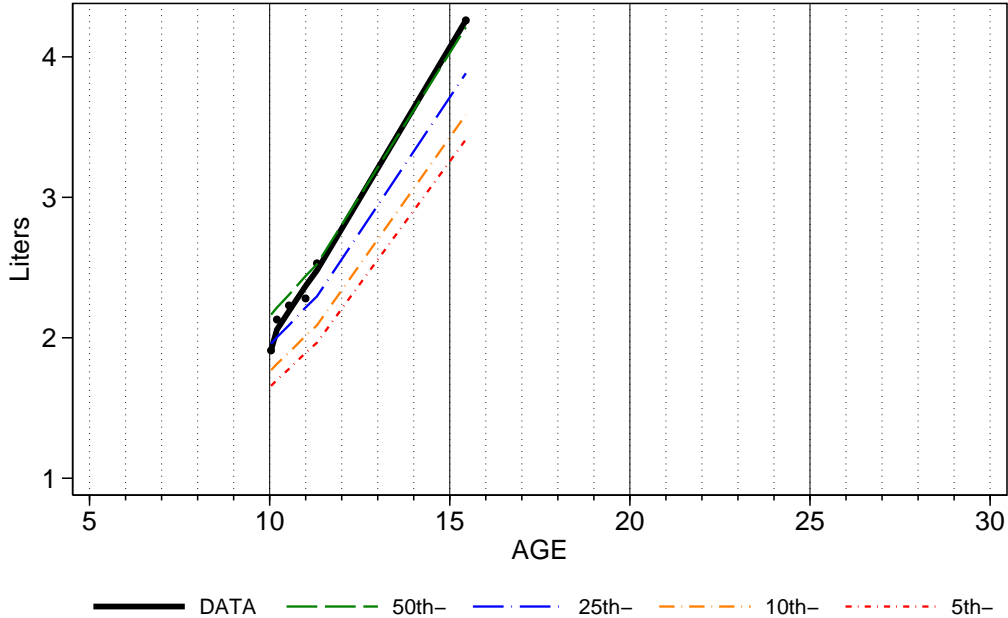

1350

**PATTERN OF GROWTH/DECLINE (Check One)**

- ( 1 ) Normal Growth
- ( 2 ) Normal Growth, Early Decline
- ( 3 ) Reduced Growth
- ( 4 ) Reduced Growth, Early Decline
- ( 9 ) Undetermined Pattern
- ( 8 ) Undetermined - not enough data

Maximum lung growth attained: ( 1 ) Yes ( 0 ) No

Plateau started: ( 2 ) No plateau ( 1 ) Yes ( 0 ) No

Decline started: ( 1 ) Yes ( 0 ) No

AGE AT each of the following periods (use '99' if N/A):

Maximum Lung Growth: \_\_\_\_ . \_\_\_\_

Start of Plateau: \_\_\_\_ . \_\_\_\_

Start of Decline: \_\_\_\_ . \_\_\_\_

### Pre-BD FEV1 Data and Percentiles: 1361

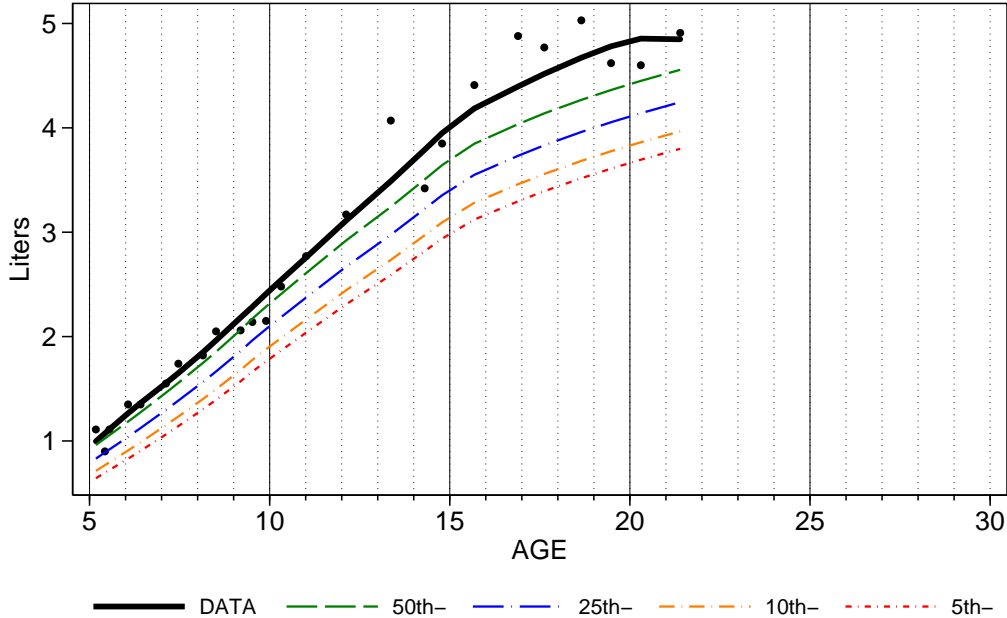

1361

**PATTERN OF GROWTH/DECLINE (Check One)**

- ( 1) Normal Growth
- ( 2) Normal Growth, Early Decline
- ( 3) Reduced Growth
- ( 4) Reduced Growth, Early Decline
- ( 9) Undetermined Pattern
- ( 8) Undetermined - not enough data

Maximum lung growth attained: ( 1) Yes ( 0) No

Plateau started: ( 2) No plateau ( 1) Yes ( 0) No

Decline started: ( 1) Yes ( 0) No

AGE AT each of the following periods (use '99' if N/A):

Maximum Lung Growth: \_\_\_\_ . \_\_\_\_

Start of Plateau: \_\_\_\_ . \_\_\_\_

Start of Decline: \_\_\_\_ . \_\_\_\_

### Pre-BD FEV1 Data and Percentiles: 1365

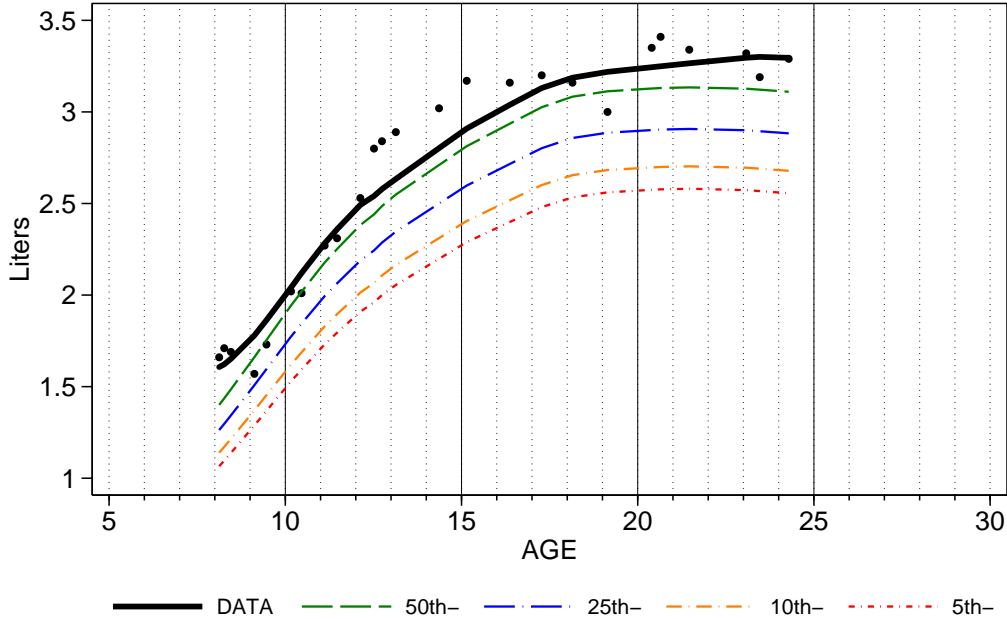

1365

**PATTERN OF GROWTH/DECLINE (Check One)**

- ( 1 ) Normal Growth
- ( 2 ) Normal Growth, Early Decline
- ( 3 ) Reduced Growth
- ( 4 ) Reduced Growth, Early Decline
- ( 9 ) Undetermined Pattern
- ( 8 ) Undetermined - not enough data

Maximum lung growth attained: ( 1 ) Yes ( 0 ) No

Plateau started: ( 2 ) No plateau ( 1 ) Yes ( 0 ) No

Decline started: ( 1 ) Yes ( 0 ) No

AGE AT each of the following periods (use '99' if N/A):

Maximum Lung Growth: \_\_\_\_ . \_\_\_\_

Start of Plateau: \_\_\_\_ . \_\_\_\_

Start of Decline: \_\_\_\_ . \_\_\_\_

### Pre-BD FEV1 Data and Percentiles: 1366

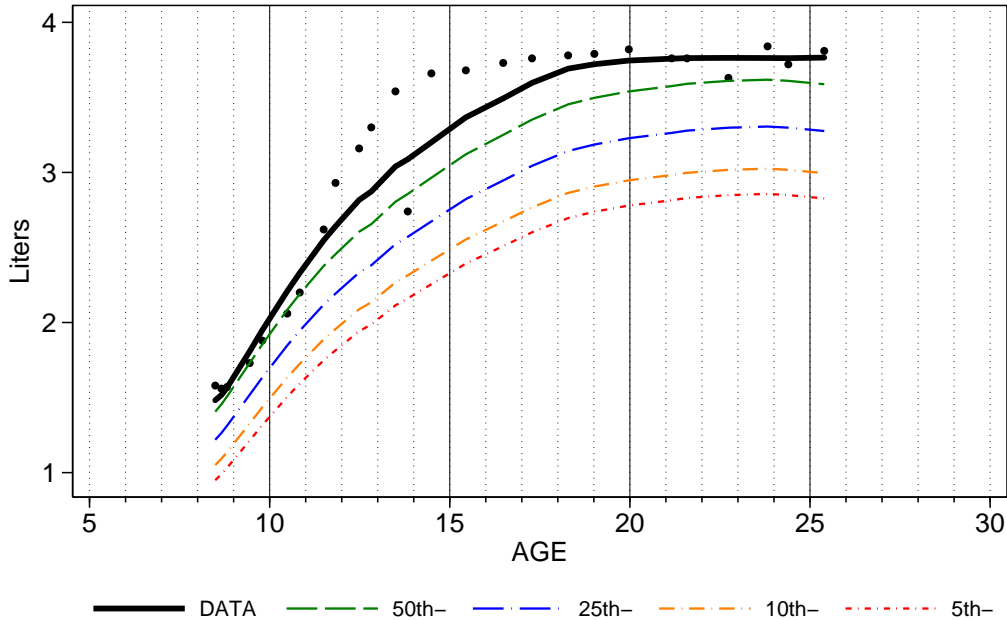

1366

**PATTERN OF GROWTH/DECLINE (Check One)**

- ( 1 ) Normal Growth
- ( 2 ) Normal Growth, Early Decline
- ( 3 ) Reduced Growth
- ( 4 ) Reduced Growth, Early Decline
- ( 9 ) Undetermined Pattern
- ( 8 ) Undetermined - not enough data

Maximum lung growth attained: ( 1 ) Yes ( 0 ) No

Plateau started: ( 2 ) No plateau ( 1 ) Yes ( 0 ) No

Decline started: ( 1 ) Yes ( 0 ) No

AGE AT each of the following periods (use '99' if N/A):

Maximum Lung Growth: \_\_\_\_ . \_\_\_\_

Start of Plateau: \_\_\_\_ . \_\_\_\_

Start of Decline: \_\_\_\_ . \_\_\_\_

### Pre-BD FEV1 Data and Percentiles: 1370

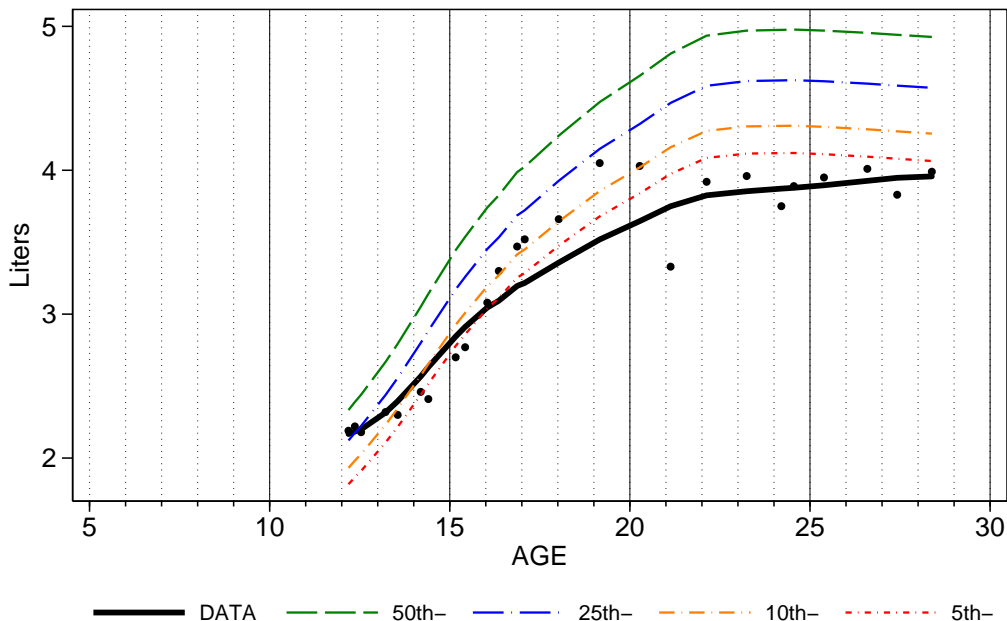

1370

**PATTERN OF GROWTH/DECLINE (Check One)**

- ( 1) Normal Growth
- ( 2) Normal Growth, Early Decline
- ( 3) Reduced Growth
- ( 4) Reduced Growth, Early Decline
- ( 9) Undetermined Pattern
- ( 8) Undetermined - not enough data

Maximum lung growth attained: ( 1) Yes ( 0) No

Plateau started: ( 2) No plateau ( 1) Yes ( 0) No

Decline started: ( 1) Yes ( 0) No

AGE AT each of the following periods (use '99' if N/A):

Maximum Lung Growth: \_\_\_\_ . \_\_\_\_

Start of Plateau: \_\_\_\_ . \_\_\_\_

Start of Decline: \_\_\_\_ . \_\_\_\_

### Pre-BD FEV1 Data and Percentiles: 1375

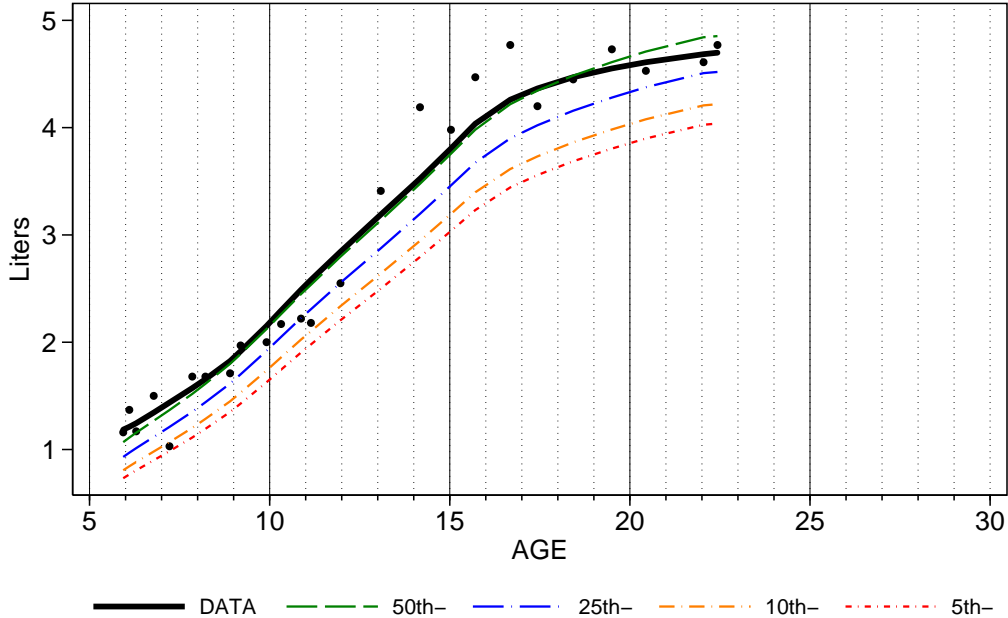

1375

**PATTERN OF GROWTH/DECLINE (Check One)**

- ( 1 ) Normal Growth
- ( 2 ) Normal Growth, Early Decline
- ( 3 ) Reduced Growth
- ( 4 ) Reduced Growth, Early Decline
- ( 9 ) Undetermined Pattern
- ( 8 ) Undetermined - not enough data

Maximum lung growth attained: ( 1 ) Yes ( 0 ) No

Plateau started: ( 2 ) No plateau ( 1 ) Yes ( 0 ) No

Decline started: ( 1 ) Yes ( 0 ) No

AGE AT each of the following periods (use '99' if N/A):

Maximum Lung Growth: \_\_\_\_ . \_\_\_\_

Start of Plateau: \_\_\_\_ . \_\_\_\_

Start of Decline: \_\_\_\_ . \_\_\_\_

### Pre-BD FEV1 Data and Percentiles: 1379

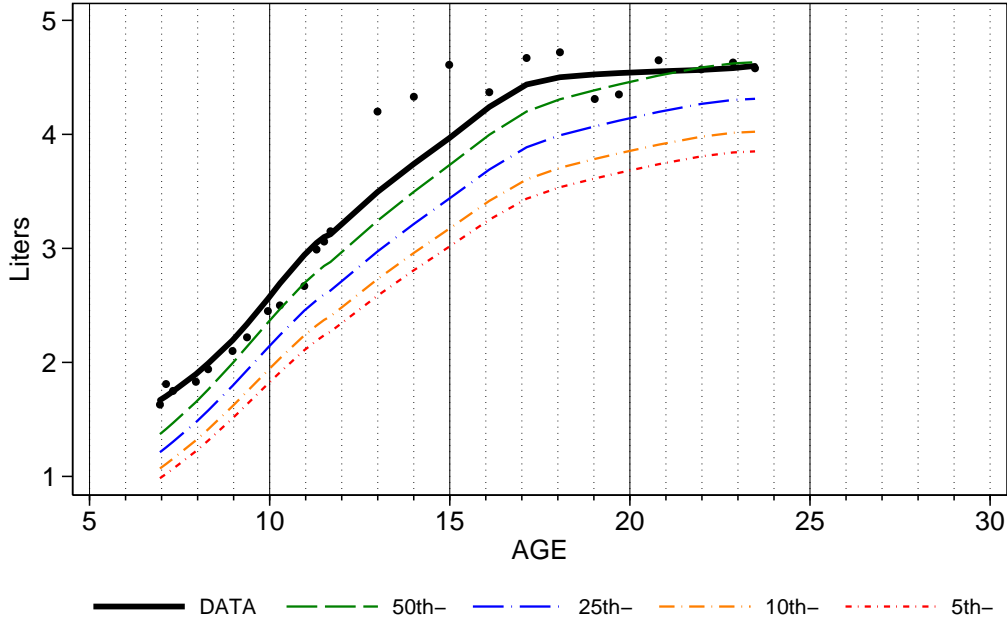

1379

**PATTERN OF GROWTH/DECLINE (Check One)**

- ( 1) Normal Growth
- ( 2) Normal Growth, Early Decline
- ( 3) Reduced Growth
- ( 4) Reduced Growth, Early Decline
- ( 9) Undetermined Pattern
- ( 8) Undetermined - not enough data

Maximum lung growth attained: ( 1) Yes ( 0) No

Plateau started: ( 2) No plateau ( 1) Yes ( 0) No

Decline started: ( 1) Yes ( 0) No

AGE AT each of the following periods (use '99' if N/A):

Maximum Lung Growth: \_\_\_\_ . \_\_\_\_

Start of Plateau: \_\_\_\_ . \_\_\_\_

Start of Decline: \_\_\_\_ . \_\_\_\_



### Pre-BD FEV1 Data and Percentiles: 1392

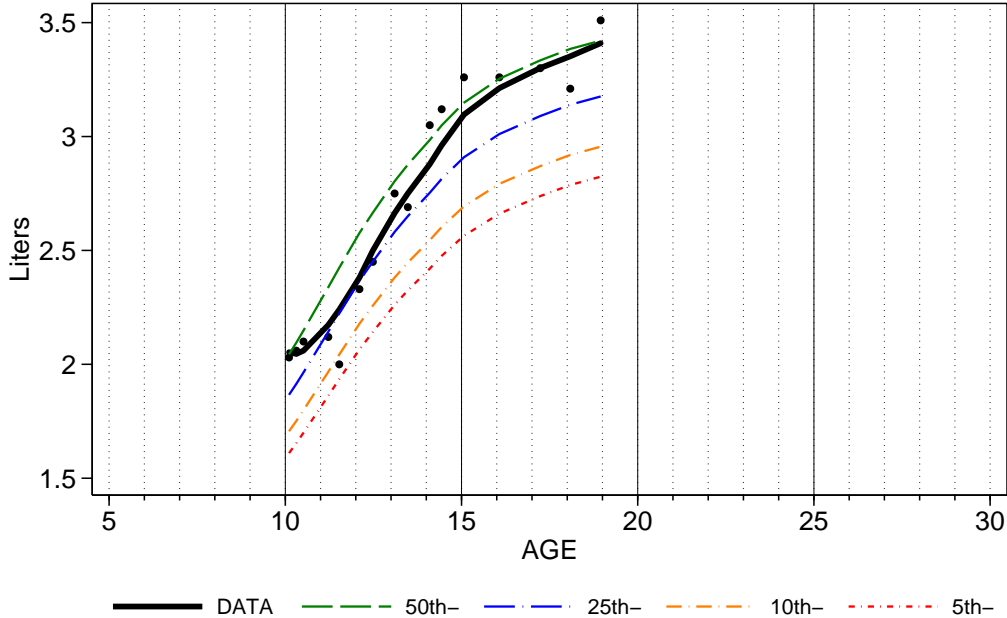

1392

**PATTERN OF GROWTH/DECLINE (Check One)**

- ( 1) Normal Growth
- ( 2) Normal Growth, Early Decline
- ( 3) Reduced Growth
- ( 4) Reduced Growth, Early Decline
- ( 9) Undetermined Pattern
- ( 8) Undetermined - not enough data

Maximum lung growth attained: ( 1) Yes ( 0) No

Plateau started: ( 2) No plateau ( 1) Yes ( 0) No

Decline started: ( 1) Yes ( 0) No

AGE AT each of the following periods (use '99' if N/A):

Maximum Lung Growth: \_\_\_\_ . \_\_\_\_

Start of Plateau: \_\_\_\_ . \_\_\_\_

Start of Decline: \_\_\_\_ . \_\_\_\_

### Pre-BD FEV1 Data and Percentiles: 1395

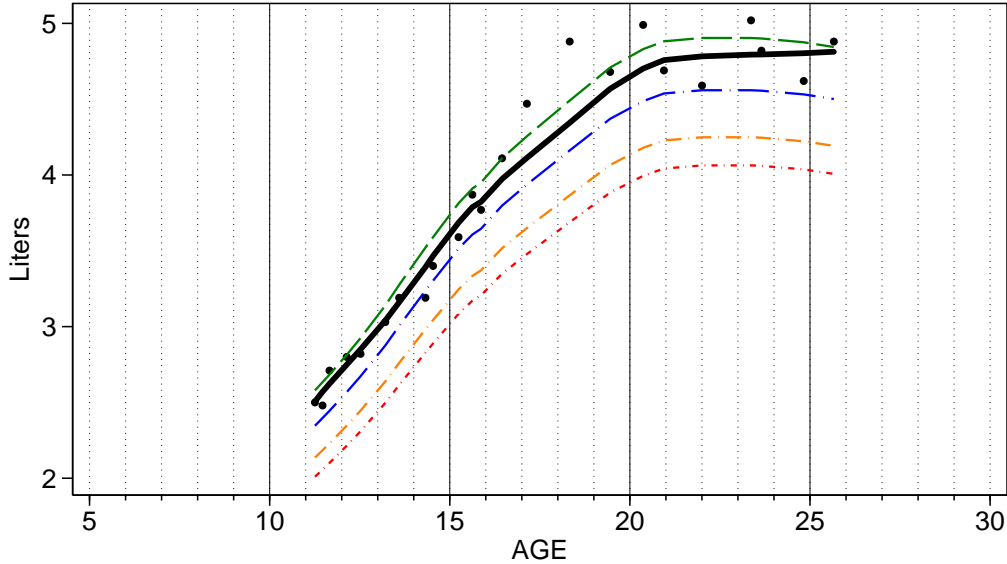

DATA  
  50th-  
  25th-  
  10th-  
  5th-

1395

**PATTERN OF GROWTH/DECLINE (Check One)**

- ( 1 ) Normal Growth
- ( 2 ) Normal Growth, Early Decline
- ( 3 ) Reduced Growth
- ( 4 ) Reduced Growth, Early Decline
- ( 9 ) Undetermined Pattern
- ( 8 ) Undetermined - not enough data

Maximum lung growth attained: ( 1 ) Yes ( 0 ) No

Plateau started: ( 2 ) No plateau ( 1 ) Yes ( 0 ) No

Decline started: ( 1 ) Yes ( 0 ) No

AGE AT each of the following periods (use '99' if N/A):

Maximum Lung Growth: \_\_\_\_ . \_\_\_\_

Start of Plateau: \_\_\_\_ . \_\_\_\_

Start of Decline: \_\_\_\_ . \_\_\_\_

### Pre-BD FEV1 Data and Percentiles: 1400

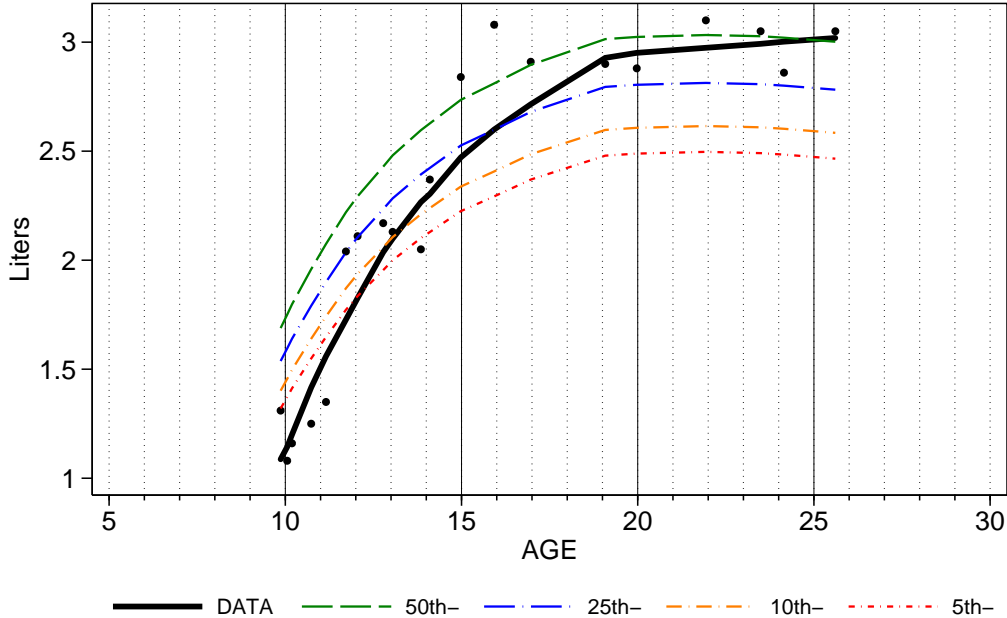

1400

**PATTERN OF GROWTH/DECLINE (Check One)**

- ( 1 ) Normal Growth
- ( 2 ) Normal Growth, Early Decline
- ( 3 ) Reduced Growth
- ( 4 ) Reduced Growth, Early Decline
- ( 9 ) Undetermined Pattern
- ( 8 ) Undetermined - not enough data

Maximum lung growth attained: ( 1 ) Yes ( 0 ) No

Plateau started: ( 2 ) No plateau ( 1 ) Yes ( 0 ) No

Decline started: ( 1 ) Yes ( 0 ) No

AGE AT each of the following periods (use '99' if N/A):

Maximum Lung Growth: \_\_\_\_ . \_\_\_\_

Start of Plateau: \_\_\_\_ . \_\_\_\_

Start of Decline: \_\_\_\_ . \_\_\_\_

### Pre-BD FEV1 Data and Percentiles: 1401

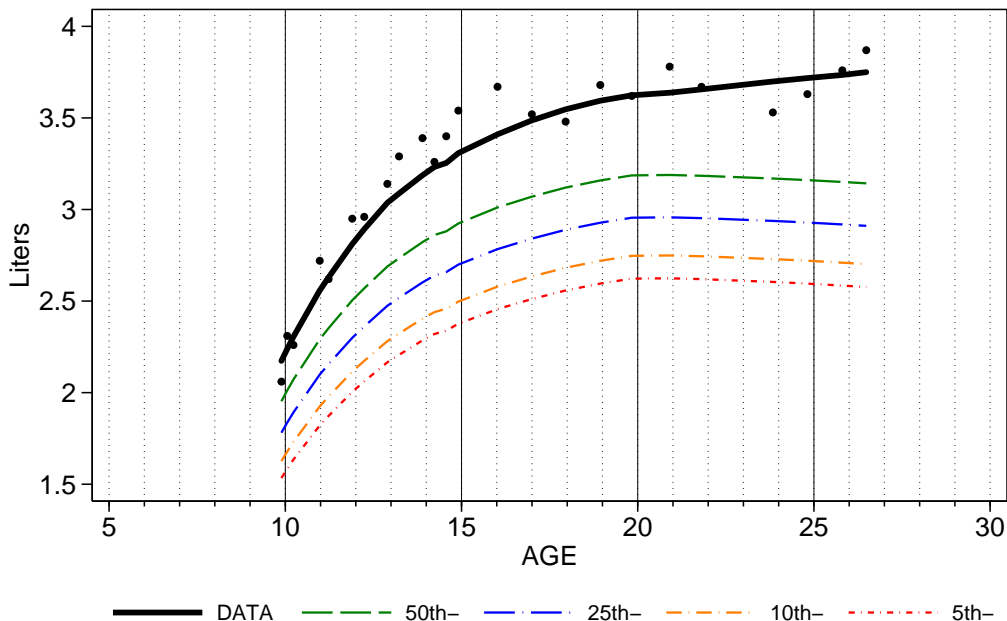

1401

**PATTERN OF GROWTH/DECLINE (Check One)**

- ( 1) Normal Growth
- ( 2) Normal Growth, Early Decline
- ( 3) Reduced Growth
- ( 4) Reduced Growth, Early Decline
- ( 9) Undetermined Pattern
- ( 8) Undetermined - not enough data

Maximum lung growth attained: ( 1) Yes ( 0) No

Plateau started: ( 2) No plateau ( 1) Yes ( 0) No

Decline started: ( 1) Yes ( 0) No

AGE AT each of the following periods (use '99' if N/A):

Maximum Lung Growth: \_\_\_\_ . \_\_\_\_

Start of Plateau: \_\_\_\_ . \_\_\_\_

Start of Decline: \_\_\_\_ . \_\_\_\_

### Pre-BD FEV1 Data and Percentiles: 1407

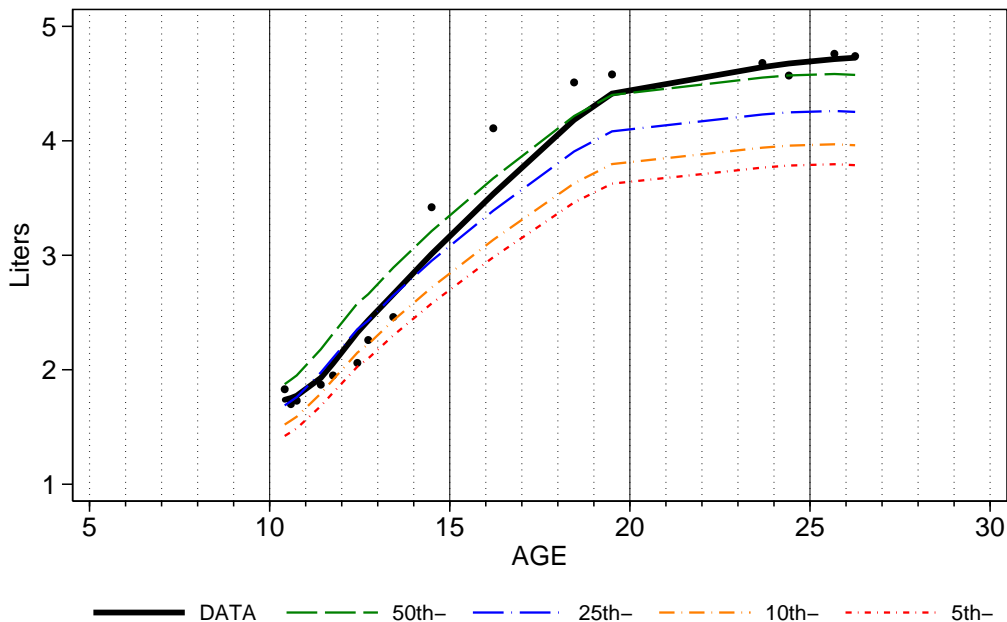

1407

**PATTERN OF GROWTH/DECLINE (Check One)**

- ( 1 ) Normal Growth
- ( 2 ) Normal Growth, Early Decline
- ( 3 ) Reduced Growth
- ( 4 ) Reduced Growth, Early Decline
- ( 9 ) Undetermined Pattern
- ( 8 ) Undetermined - not enough data

Maximum lung growth attained: ( 1 ) Yes ( 0 ) No

Plateau started: ( 2 ) No plateau ( 1 ) Yes ( 0 ) No

Decline started: ( 1 ) Yes ( 0 ) No

AGE AT each of the following periods (use '99' if N/A):

Maximum Lung Growth: \_\_\_\_ . \_\_\_\_

Start of Plateau: \_\_\_\_ . \_\_\_\_

Start of Decline: \_\_\_\_ . \_\_\_\_

### Pre-BD FEV1 Data and Percentiles: 1415

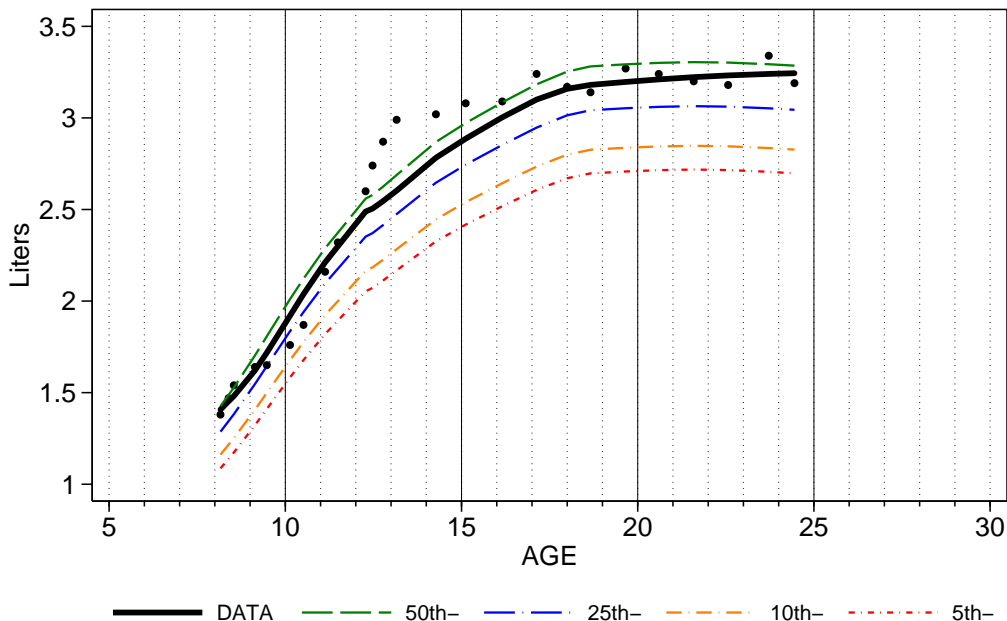

1415

**PATTERN OF GROWTH/DECLINE (Check One)**

- ( 1 ) Normal Growth
- ( 2 ) Normal Growth, Early Decline
- ( 3 ) Reduced Growth
- ( 4 ) Reduced Growth, Early Decline
- ( 9 ) Undetermined Pattern
- ( 8 ) Undetermined - not enough data

Maximum lung growth attained: ( 1 ) Yes ( 0 ) No

Plateau started: ( 2 ) No plateau ( 1 ) Yes ( 0 ) No

Decline started: ( 1 ) Yes ( 0 ) No

AGE AT each of the following periods (use '99' if N/A):

Maximum Lung Growth: \_\_\_\_ . \_\_\_\_

Start of Plateau: \_\_\_\_ . \_\_\_\_

Start of Decline: \_\_\_\_ . \_\_\_\_

### Pre-BD FEV1 Data and Percentiles: 1418

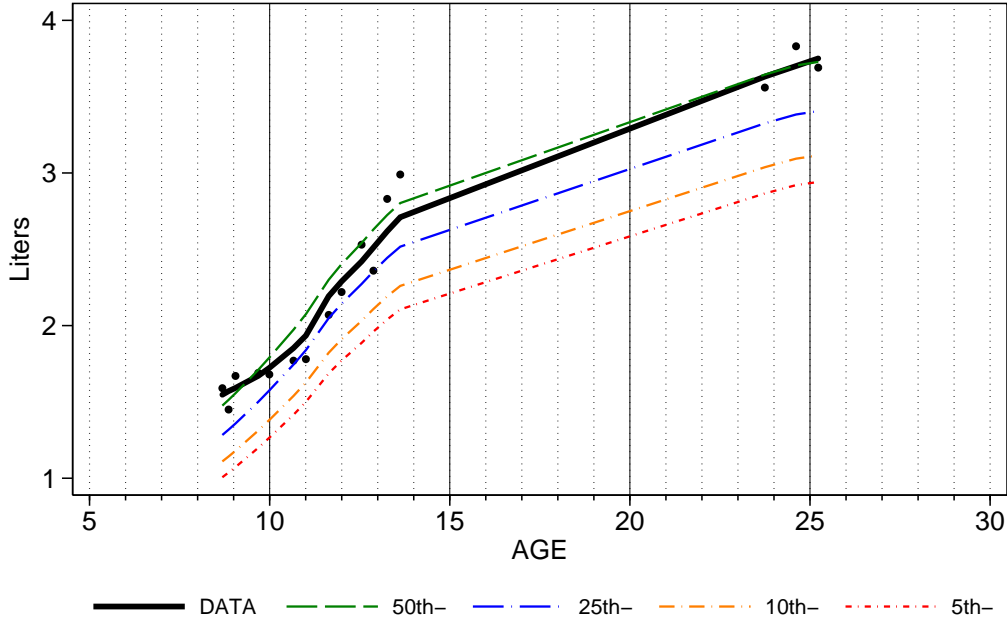

1418

**PATTERN OF GROWTH/DECLINE (Check One)**

- ( 1 ) Normal Growth
- ( 2 ) Normal Growth, Early Decline
- ( 3 ) Reduced Growth
- ( 4 ) Reduced Growth, Early Decline
- ( 9 ) Undetermined Pattern
- ( 8 ) Undetermined - not enough data

Maximum lung growth attained: ( 1 ) Yes ( 0 ) No

Plateau started: ( 2 ) No plateau ( 1 ) Yes ( 0 ) No

Decline started: ( 1 ) Yes ( 0 ) No

AGE AT each of the following periods (use '99' if N/A):

Maximum Lung Growth: \_\_\_\_ . \_\_\_\_

Start of Plateau: \_\_\_\_ . \_\_\_\_

Start of Decline: \_\_\_\_ . \_\_\_\_

### Pre-BD FEV1 Data and Percentiles: 1420

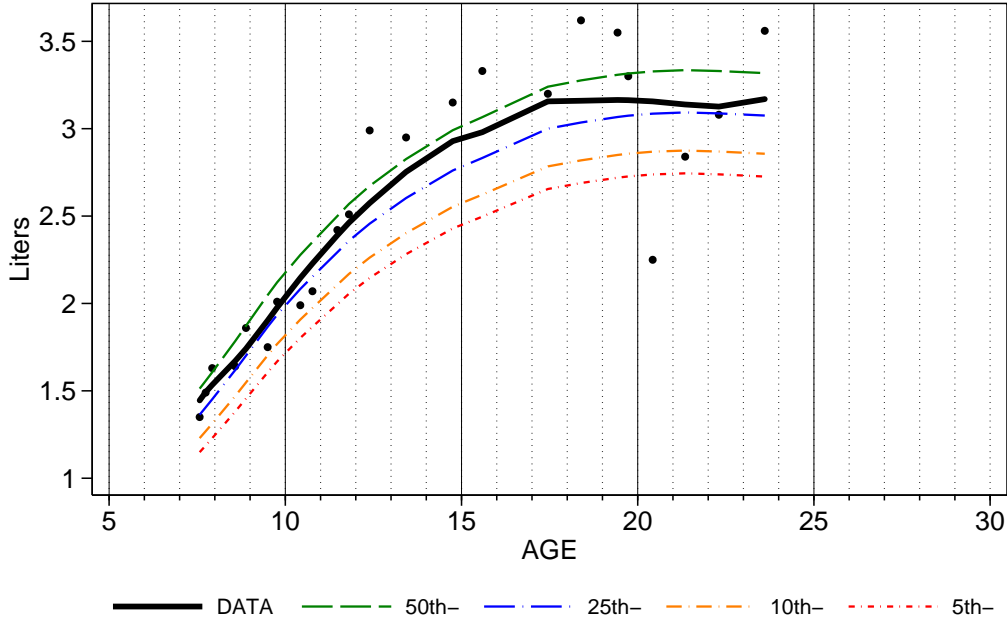

1420

**PATTERN OF GROWTH/DECLINE (Check One)**

- ( 1 ) Normal Growth
- ( 2 ) Normal Growth, Early Decline
- ( 3 ) Reduced Growth
- ( 4 ) Reduced Growth, Early Decline
- ( 9 ) Undetermined Pattern
- ( 8 ) Undetermined - not enough data

Maximum lung growth attained: ( 1 ) Yes ( 0 ) No

Plateau started: ( 2 ) No plateau ( 1 ) Yes ( 0 ) No

Decline started: ( 1 ) Yes ( 0 ) No

AGE AT each of the following periods (use '99' if N/A):

Maximum Lung Growth: \_\_\_\_ . \_\_\_\_

Start of Plateau: \_\_\_\_ . \_\_\_\_

Start of Decline: \_\_\_\_ . \_\_\_\_



### Pre-BD FEV1 Data and Percentiles: 1422

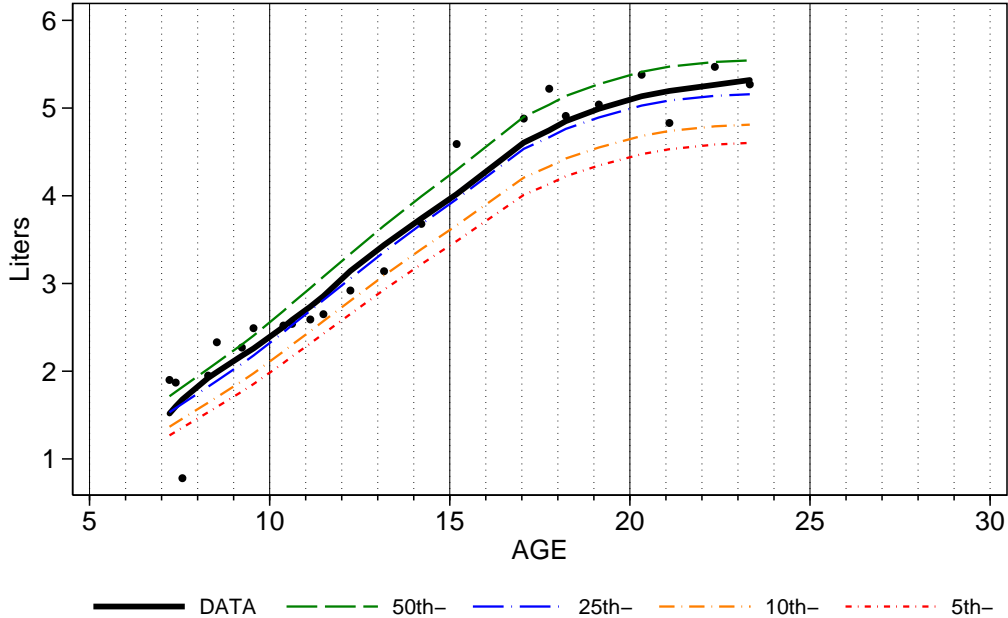

1422

**PATTERN OF GROWTH/DECLINE (Check One)**

- ( 1) Normal Growth
- ( 2) Normal Growth, Early Decline
- ( 3) Reduced Growth
- ( 4) Reduced Growth, Early Decline
- ( 9) Undetermined Pattern
- ( 8) Undetermined - not enough data

Maximum lung growth attained: ( 1) Yes ( 0) No

Plateau started: ( 2) No plateau ( 1) Yes ( 0) No

Decline started: ( 1) Yes ( 0) No

AGE AT each of the following periods (use '99' if N/A):

Maximum Lung Growth: \_\_\_\_ . \_\_\_\_

Start of Plateau: \_\_\_\_ . \_\_\_\_

Start of Decline: \_\_\_\_ . \_\_\_\_

### Pre-BD FEV1 Data and Percentiles: 1424

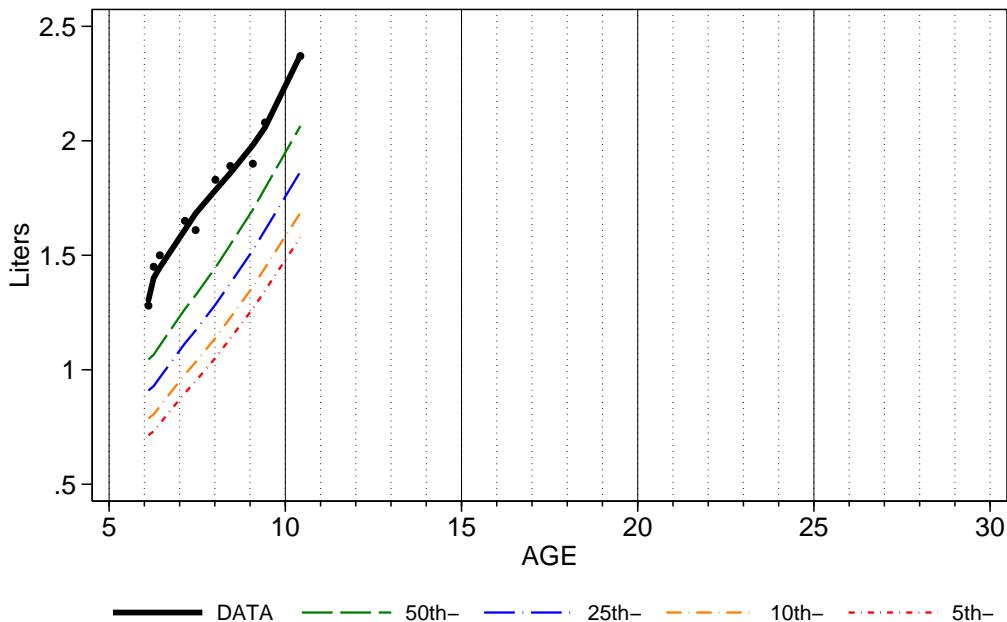

1424

**PATTERN OF GROWTH/DECLINE (Check One)**

- ( 1) Normal Growth
- ( 2) Normal Growth, Early Decline
- ( 3) Reduced Growth
- ( 4) Reduced Growth, Early Decline
- ( 9) Undetermined Pattern
- ( 8) Undetermined - not enough data

Maximum lung growth attained: ( 1) Yes ( 0) No

Plateau started: ( 2) No plateau ( 1) Yes ( 0) No

Decline started: ( 1) Yes ( 0) No

AGE AT each of the following periods (use '99' if N/A):

Maximum Lung Growth: \_\_\_\_ . \_\_\_\_

Start of Plateau: \_\_\_\_ . \_\_\_\_

Start of Decline: \_\_\_\_ . \_\_\_\_

### Pre-BD FEV1 Data and Percentiles: 1426

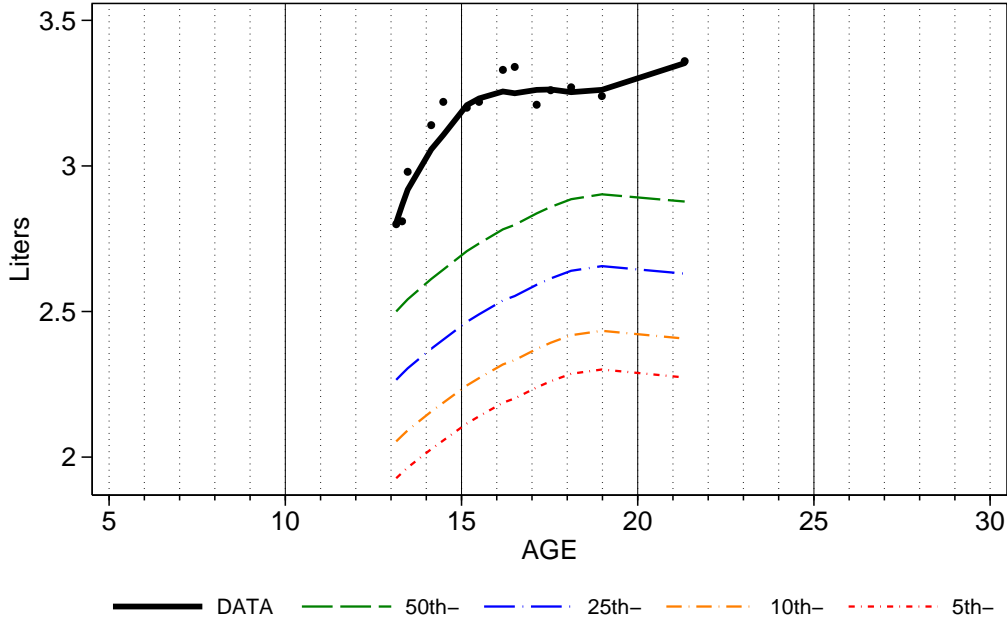

1426

**PATTERN OF GROWTH/DECLINE (Check One)**

- ( 1 ) Normal Growth
- ( 2 ) Normal Growth, Early Decline
- ( 3 ) Reduced Growth
- ( 4 ) Reduced Growth, Early Decline
- ( 9 ) Undetermined Pattern
- ( 8 ) Undetermined - not enough data

Maximum lung growth attained: ( 1 ) Yes ( 0 ) No

Plateau started: ( 2 ) No plateau ( 1 ) Yes ( 0 ) No

Decline started: ( 1 ) Yes ( 0 ) No

AGE AT each of the following periods (use '99' if N/A):

Maximum Lung Growth: \_\_\_\_ . \_\_\_\_

Start of Plateau: \_\_\_\_ . \_\_\_\_

Start of Decline: \_\_\_\_ . \_\_\_\_

### Pre-BD FEV1 Data and Percentiles: 1432

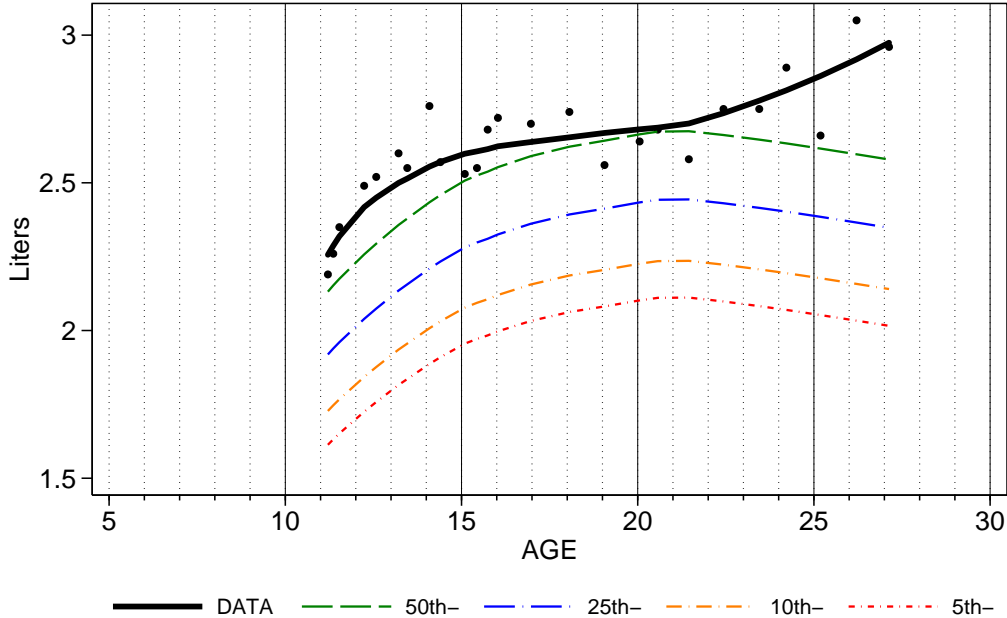

1432

**PATTERN OF GROWTH/DECLINE (Check One)**

- ( 1) Normal Growth
- ( 2) Normal Growth, Early Decline
- ( 3) Reduced Growth
- ( 4) Reduced Growth, Early Decline
- ( 9) Undetermined Pattern
- ( 8) Undetermined - not enough data

Maximum lung growth attained: ( 1) Yes ( 0) No

Plateau started: ( 2) No plateau ( 1) Yes ( 0) No

Decline started: ( 1) Yes ( 0) No

AGE AT each of the following periods (use '99' if N/A):

Maximum Lung Growth: \_\_\_\_ . \_\_\_\_

Start of Plateau: \_\_\_\_ . \_\_\_\_

Start of Decline: \_\_\_\_ . \_\_\_\_

### Pre-BD FEV1 Data and Percentiles: 1436

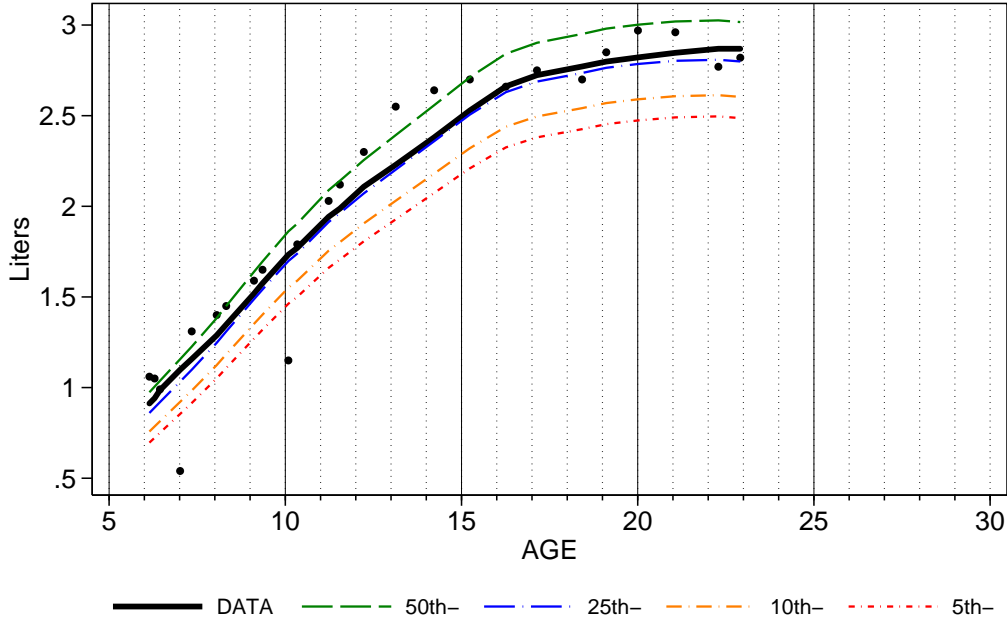

1436

**PATTERN OF GROWTH/DECLINE (Check One)**

- ( 1) Normal Growth
- ( 2) Normal Growth, Early Decline
- ( 3) Reduced Growth
- ( 4) Reduced Growth, Early Decline
- ( 9) Undetermined Pattern
- ( 8) Undetermined - not enough data

Maximum lung growth attained: ( 1) Yes ( 0) No

Plateau started: ( 2) No plateau ( 1) Yes ( 0) No

Decline started: ( 1) Yes ( 0) No

AGE AT each of the following periods (use '99' if N/A):

Maximum Lung Growth: \_\_\_\_ . \_\_\_\_

Start of Plateau: \_\_\_\_ . \_\_\_\_

Start of Decline: \_\_\_\_ . \_\_\_\_

### Pre-BD FEV1 Data and Percentiles: 1440

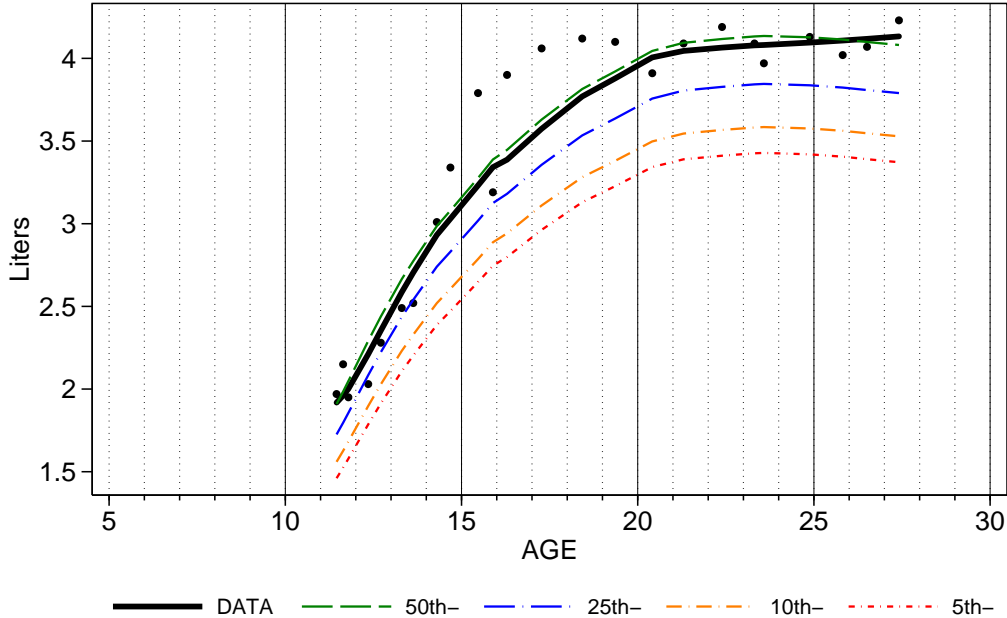

1440

**PATTERN OF GROWTH/DECLINE (Check One)**

- ( 1) Normal Growth
- ( 2) Normal Growth, Early Decline
- ( 3) Reduced Growth
- ( 4) Reduced Growth, Early Decline
- ( 9) Undetermined Pattern
- ( 8) Undetermined - not enough data

Maximum lung growth attained: ( 1) Yes ( 0) No

Plateau started: ( 2) No plateau ( 1) Yes ( 0) No

Decline started: ( 1) Yes ( 0) No

AGE AT each of the following periods (use '99' if N/A):

Maximum Lung Growth: \_\_\_\_ . \_\_\_\_

Start of Plateau: \_\_\_\_ . \_\_\_\_

Start of Decline: \_\_\_\_ . \_\_\_\_

### Pre-BD FEV1 Data and Percentiles: 1443

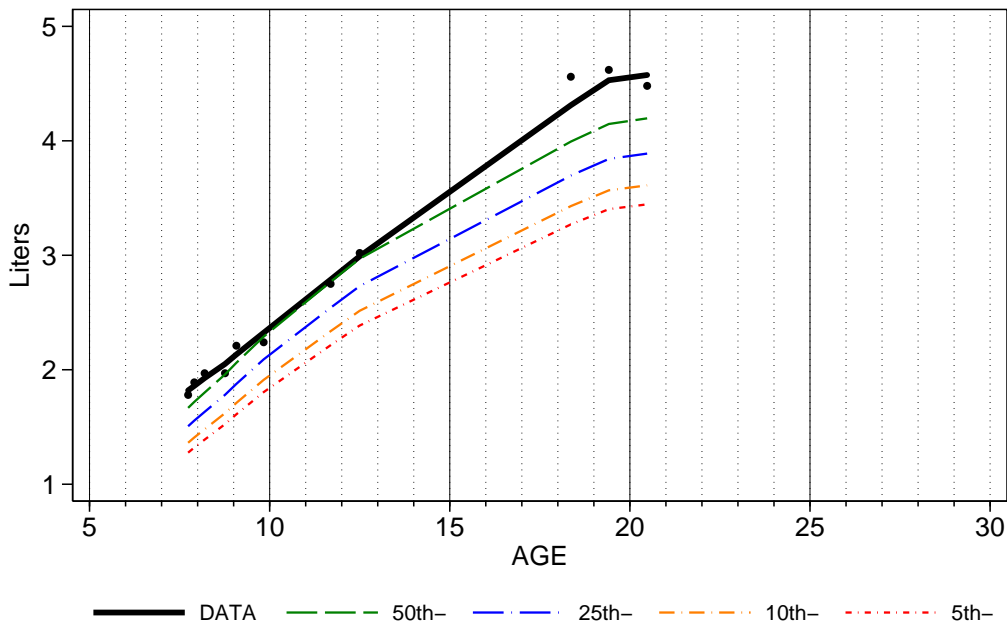

1443

**PATTERN OF GROWTH/DECLINE (Check One)**

- ( 1 ) Normal Growth
- ( 2 ) Normal Growth, Early Decline
- ( 3 ) Reduced Growth
- ( 4 ) Reduced Growth, Early Decline
- ( 9 ) Undetermined Pattern
- ( 8 ) Undetermined - not enough data

Maximum lung growth attained: ( 1 ) Yes ( 0 ) No

Plateau started: ( 2 ) No plateau ( 1 ) Yes ( 0 ) No

Decline started: ( 1 ) Yes ( 0 ) No

AGE AT each of the following periods (use '99' if N/A):

Maximum Lung Growth: \_\_\_\_ . \_\_\_\_

Start of Plateau: \_\_\_\_ . \_\_\_\_

Start of Decline: \_\_\_\_ . \_\_\_\_

### Pre-BD FEV1 Data and Percentiles: 1445

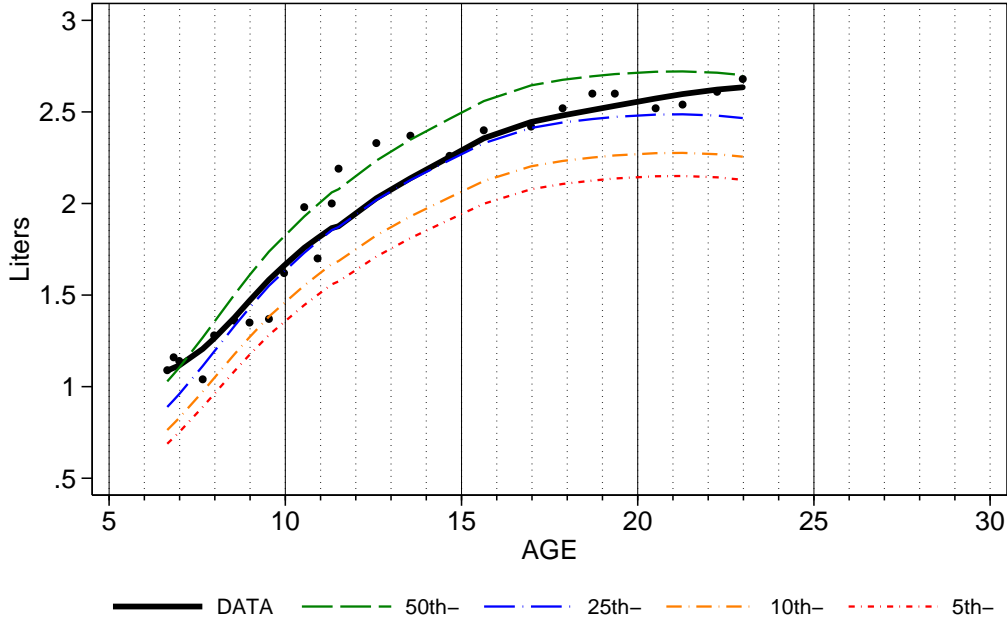

1445

**PATTERN OF GROWTH/DECLINE (Check One)**

- ( 1 ) Normal Growth
- ( 2 ) Normal Growth, Early Decline
- ( 3 ) Reduced Growth
- ( 4 ) Reduced Growth, Early Decline
- ( 9 ) Undetermined Pattern
- ( 8 ) Undetermined - not enough data

Maximum lung growth attained: ( 1 ) Yes ( 0 ) No

Plateau started: ( 2 ) No plateau ( 1 ) Yes ( 0 ) No

Decline started: ( 1 ) Yes ( 0 ) No

AGE AT each of the following periods (use '99' if N/A):

Maximum Lung Growth: \_\_\_\_ . \_\_\_\_

Start of Plateau: \_\_\_\_ . \_\_\_\_

Start of Decline: \_\_\_\_ . \_\_\_\_



### Pre-BD FEV1 Data and Percentiles: 1446

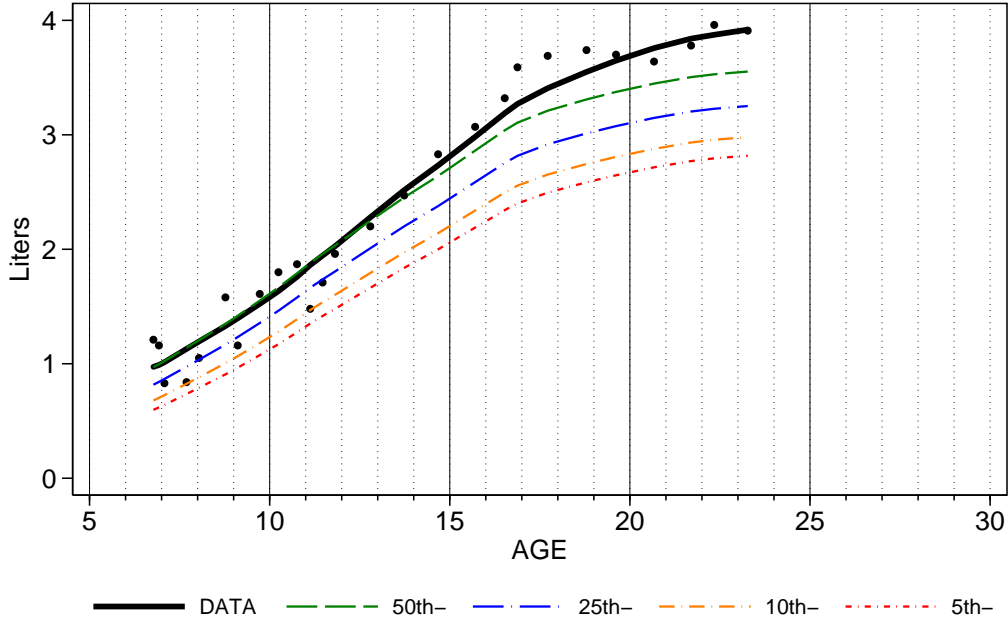

1446

**PATTERN OF GROWTH/DECLINE (Check One)**

- ( 1) Normal Growth
- ( 2) Normal Growth, Early Decline
- ( 3) Reduced Growth
- ( 4) Reduced Growth, Early Decline
- ( 9) Undetermined Pattern
- ( 8) Undetermined - not enough data

Maximum lung growth attained: ( 1) Yes ( 0) No

Plateau started: ( 2) No plateau ( 1) Yes ( 0) No

Decline started: ( 1) Yes ( 0) No

AGE AT each of the following periods (use '99' if N/A):

Maximum Lung Growth: \_\_\_\_ . \_\_\_\_

Start of Plateau: \_\_\_\_ . \_\_\_\_

Start of Decline: \_\_\_\_ . \_\_\_\_

### Pre-BD FEV1 Data and Percentiles: 1453

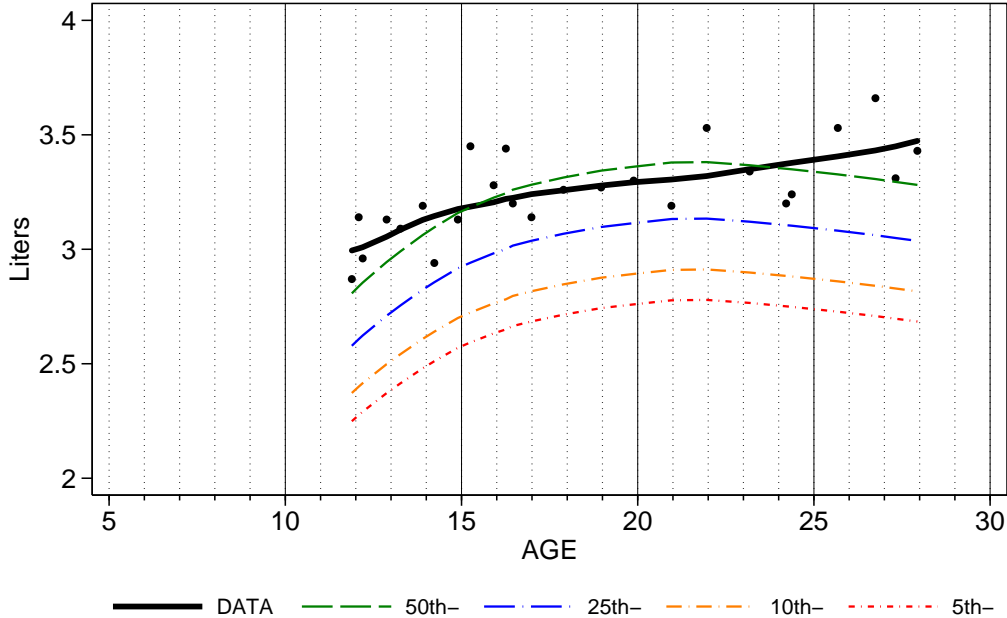

1453

**PATTERN OF GROWTH/DECLINE (Check One)**

- ( 1) Normal Growth
- ( 2) Normal Growth, Early Decline
- ( 3) Reduced Growth
- ( 4) Reduced Growth, Early Decline
- ( 9) Undetermined Pattern
- ( 8) Undetermined - not enough data

Maximum lung growth attained: ( 1) Yes ( 0) No

Plateau started: ( 2) No plateau ( 1) Yes ( 0) No

Decline started: ( 1) Yes ( 0) No

AGE AT each of the following periods (use '99' if N/A):

Maximum Lung Growth: \_\_\_\_ . \_\_\_\_

Start of Plateau: \_\_\_\_ . \_\_\_\_

Start of Decline: \_\_\_\_ . \_\_\_\_

### Pre-BD FEV1 Data and Percentiles: 1454

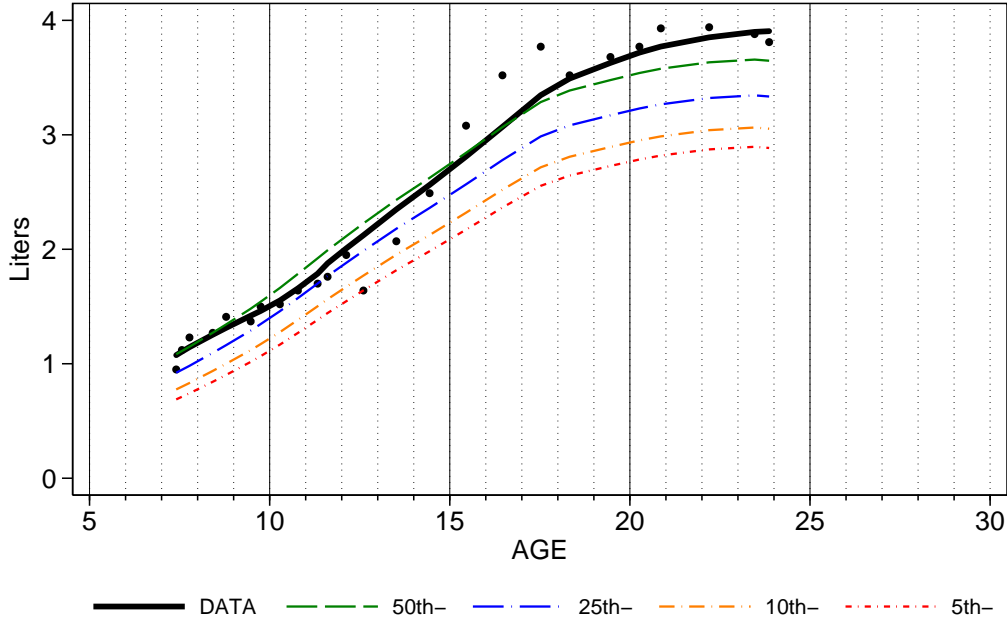

1454

**PATTERN OF GROWTH/DECLINE (Check One)**

- ( 1) Normal Growth
- ( 2) Normal Growth, Early Decline
- ( 3) Reduced Growth
- ( 4) Reduced Growth, Early Decline
- ( 9) Undetermined Pattern
- ( 8) Undetermined - not enough data

Maximum lung growth attained: ( 1) Yes ( 0) No

Plateau started: ( 2) No plateau ( 1) Yes ( 0) No

Decline started: ( 1) Yes ( 0) No

AGE AT each of the following periods (use '99' if N/A):

Maximum Lung Growth: \_\_\_\_ . \_\_\_\_

Start of Plateau: \_\_\_\_ . \_\_\_\_

Start of Decline: \_\_\_\_ . \_\_\_\_

### Pre-BD FEV1 Data and Percentiles: 1465

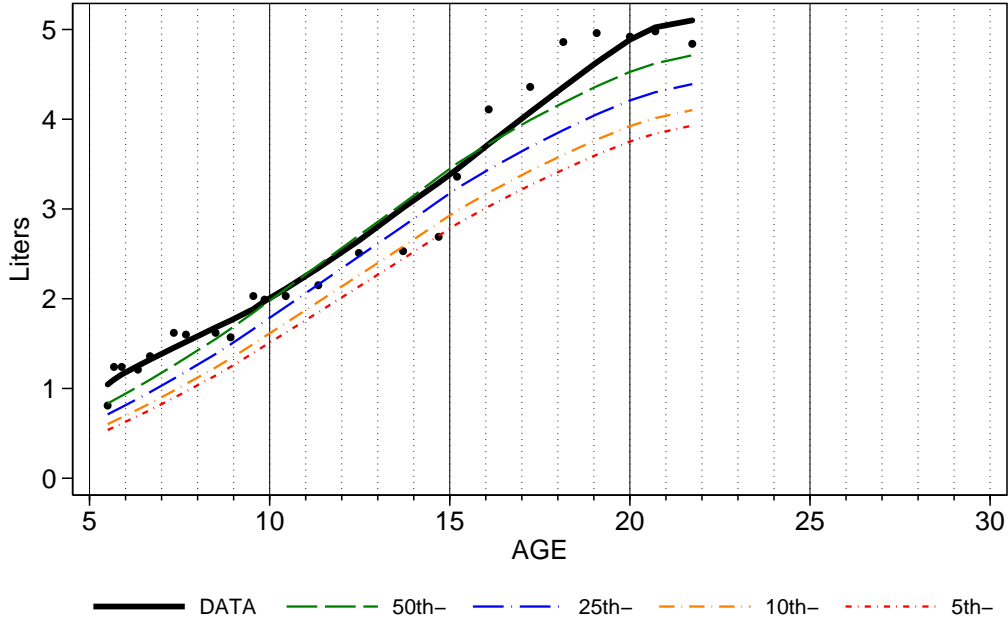

1465

**PATTERN OF GROWTH/DECLINE (Check One)**

- ( 1) Normal Growth
- ( 2) Normal Growth, Early Decline
- ( 3) Reduced Growth
- ( 4) Reduced Growth, Early Decline
- ( 9) Undetermined Pattern
- ( 8) Undetermined - not enough data

Maximum lung growth attained: ( 1) Yes ( 0) No

Plateau started: ( 2) No plateau ( 1) Yes ( 0) No

Decline started: ( 1) Yes ( 0) No

AGE AT each of the following periods (use '99' if N/A):

Maximum Lung Growth: \_\_\_\_ . \_\_\_\_

Start of Plateau: \_\_\_\_ . \_\_\_\_

Start of Decline: \_\_\_\_ . \_\_\_\_

### Pre-BD FEV1 Data and Percentiles: 1466

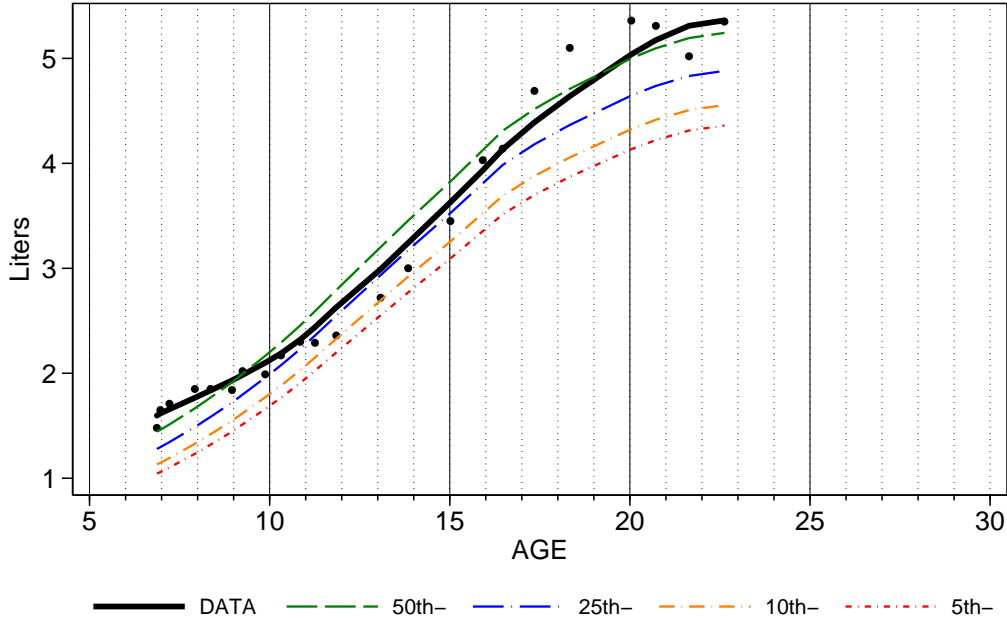

1466

**PATTERN OF GROWTH/DECLINE (Check One)**

- ( 1 ) Normal Growth
- ( 2 ) Normal Growth, Early Decline
- ( 3 ) Reduced Growth
- ( 4 ) Reduced Growth, Early Decline
- ( 9 ) Undetermined Pattern
- ( 8 ) Undetermined - not enough data

Maximum lung growth attained: ( 1 ) Yes ( 0 ) No

Plateau started: ( 2 ) No plateau ( 1 ) Yes ( 0 ) No

Decline started: ( 1 ) Yes ( 0 ) No

AGE AT each of the following periods (use '99' if N/A):

Maximum Lung Growth: \_\_\_\_ . \_\_\_\_

Start of Plateau: \_\_\_\_ . \_\_\_\_

Start of Decline: \_\_\_\_ . \_\_\_\_

### Pre-BD FEV1 Data and Percentiles: 1471

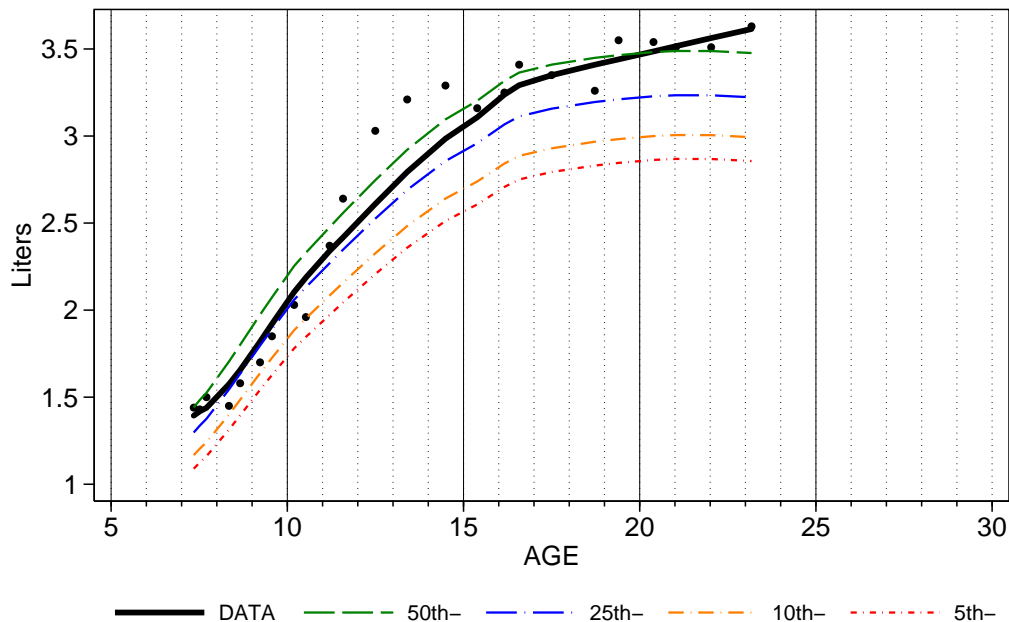

1471

**PATTERN OF GROWTH/DECLINE (Check One)**

- ( 1) Normal Growth
- ( 2) Normal Growth, Early Decline
- ( 3) Reduced Growth
- ( 4) Reduced Growth, Early Decline
- ( 9) Undetermined Pattern
- ( 8) Undetermined - not enough data

Maximum lung growth attained: ( 1) Yes ( 0) No

Plateau started: ( 2) No plateau ( 1) Yes ( 0) No

Decline started: ( 1) Yes ( 0) No

AGE AT each of the following periods (use '99' if N/A):

Maximum Lung Growth: \_\_\_\_ . \_\_\_\_

Start of Plateau: \_\_\_\_ . \_\_\_\_

Start of Decline: \_\_\_\_ . \_\_\_\_

### Pre-BD FEV1 Data and Percentiles: 1474

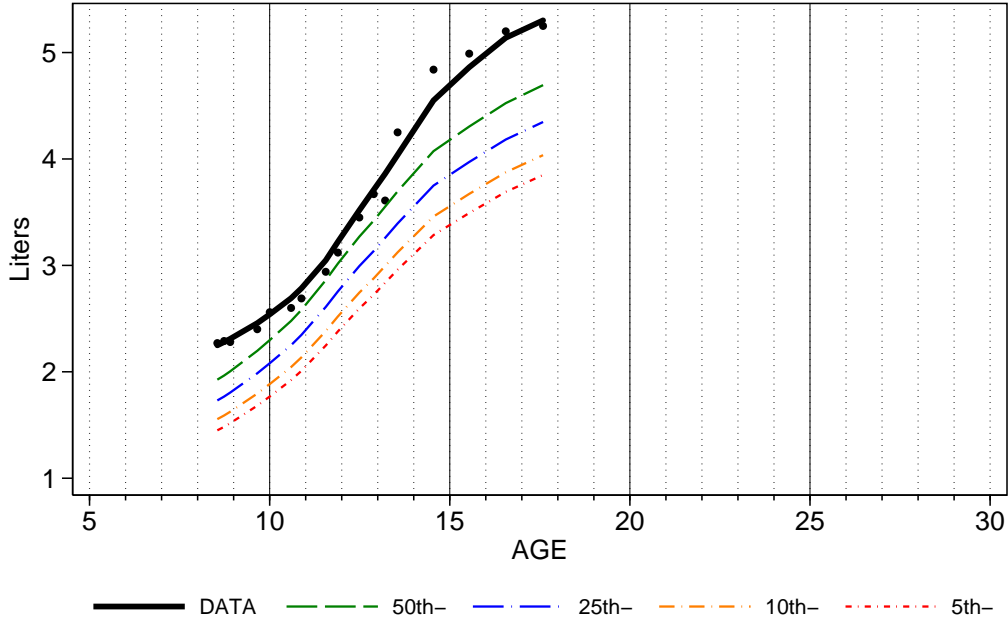

1474

**PATTERN OF GROWTH/DECLINE (Check One)**

- ( 1 ) Normal Growth
- ( 2 ) Normal Growth, Early Decline
- ( 3 ) Reduced Growth
- ( 4 ) Reduced Growth, Early Decline
- ( 9 ) Undetermined Pattern
- ( 8 ) Undetermined - not enough data

Maximum lung growth attained: ( 1 ) Yes ( 0 ) No

Plateau started: ( 2 ) No plateau ( 1 ) Yes ( 0 ) No

Decline started: ( 1 ) Yes ( 0 ) No

AGE AT each of the following periods (use '99' if N/A):

Maximum Lung Growth: \_\_\_\_ . \_\_\_\_

Start of Plateau: \_\_\_\_ . \_\_\_\_

Start of Decline: \_\_\_\_ . \_\_\_\_

### Pre-BD FEV1 Data and Percentiles: 1477

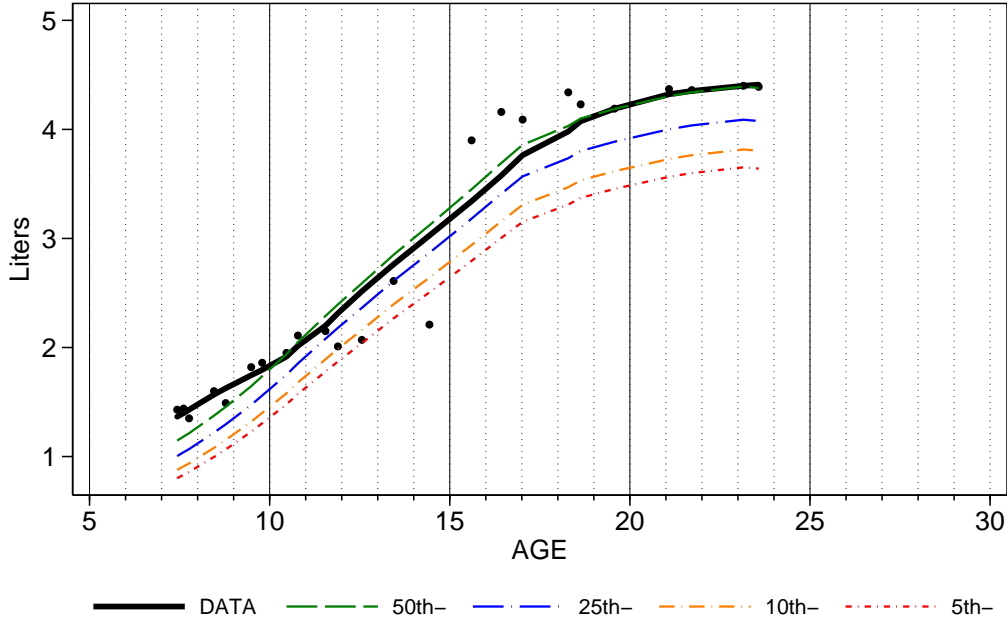

1477

**PATTERN OF GROWTH/DECLINE (Check One)**

- ( 1 ) Normal Growth
- ( 2 ) Normal Growth, Early Decline
- ( 3 ) Reduced Growth
- ( 4 ) Reduced Growth, Early Decline
- ( 9 ) Undetermined Pattern
- ( 8 ) Undetermined - not enough data

Maximum lung growth attained: ( 1 ) Yes ( 0 ) No

Plateau started: ( 2 ) No plateau ( 1 ) Yes ( 0 ) No

Decline started: ( 1 ) Yes ( 0 ) No

AGE AT each of the following periods (use '99' if N/A):

Maximum Lung Growth: \_\_\_\_ . \_\_\_\_

Start of Plateau: \_\_\_\_ . \_\_\_\_

Start of Decline: \_\_\_\_ . \_\_\_\_



### Pre-BD FEV1 Data and Percentiles: 1480

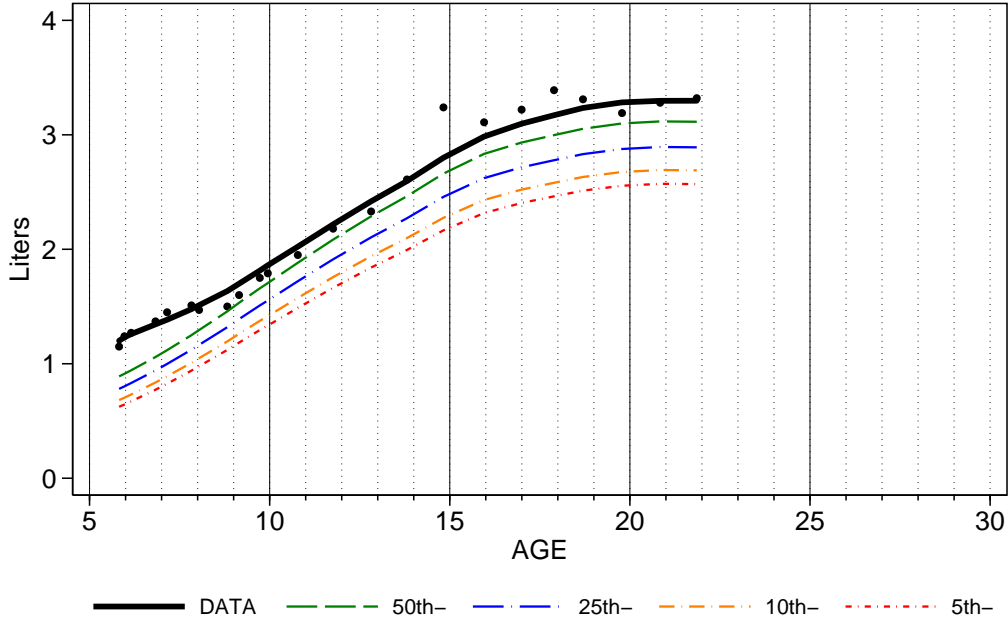

1480

**PATTERN OF GROWTH/DECLINE (Check One)**

- ( 1 ) Normal Growth
- ( 2 ) Normal Growth, Early Decline
- ( 3 ) Reduced Growth
- ( 4 ) Reduced Growth, Early Decline
- ( 9 ) Undetermined Pattern
- ( 8 ) Undetermined - not enough data

Maximum lung growth attained: ( 1 ) Yes ( 0 ) No

Plateau started: ( 2 ) No plateau ( 1 ) Yes ( 0 ) No

Decline started: ( 1 ) Yes ( 0 ) No

AGE AT each of the following periods (use '99' if N/A):

Maximum Lung Growth: \_\_\_\_ . \_\_\_\_

Start of Plateau: \_\_\_\_ . \_\_\_\_

Start of Decline: \_\_\_\_ . \_\_\_\_

### Pre-BD FEV1 Data and Percentiles: 1487

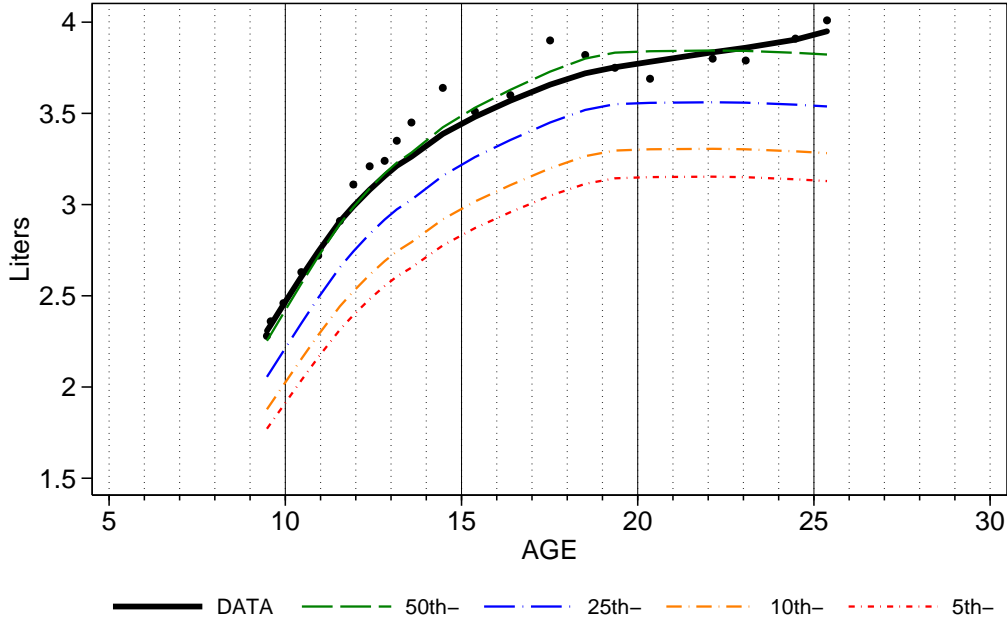

1487

**PATTERN OF GROWTH/DECLINE (Check One)**

- ( 1) Normal Growth
- ( 2) Normal Growth, Early Decline
- ( 3) Reduced Growth
- ( 4) Reduced Growth, Early Decline
- ( 9) Undetermined Pattern
- ( 8) Undetermined - not enough data

Maximum lung growth attained: ( 1) Yes ( 0) No

Plateau started: ( 2) No plateau ( 1) Yes ( 0) No

Decline started: ( 1) Yes ( 0) No

AGE AT each of the following periods (use '99' if N/A):

Maximum Lung Growth: \_\_\_\_ . \_\_\_\_

Start of Plateau: \_\_\_\_ . \_\_\_\_

Start of Decline: \_\_\_\_ . \_\_\_\_

### Pre-BD FEV1 Data and Percentiles: 1490

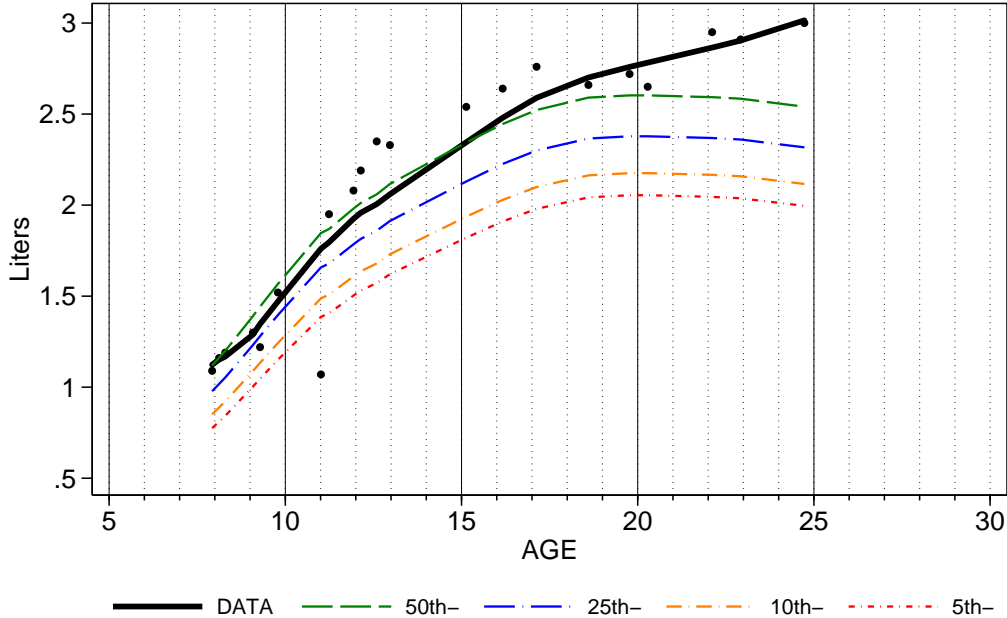

1490

**PATTERN OF GROWTH/DECLINE (Check One)**

- ( 1 ) Normal Growth
- ( 2 ) Normal Growth, Early Decline
- ( 3 ) Reduced Growth
- ( 4 ) Reduced Growth, Early Decline
- ( 9 ) Undetermined Pattern
- ( 8 ) Undetermined - not enough data

Maximum lung growth attained: ( 1 ) Yes ( 0 ) No

Plateau started: ( 2 ) No plateau ( 1 ) Yes ( 0 ) No

Decline started: ( 1 ) Yes ( 0 ) No

AGE AT each of the following periods (use '99' if N/A):

Maximum Lung Growth: \_\_\_\_ . \_\_\_\_

Start of Plateau: \_\_\_\_ . \_\_\_\_

Start of Decline: \_\_\_\_ . \_\_\_\_

### Pre-BD FEV1 Data and Percentiles: 1492

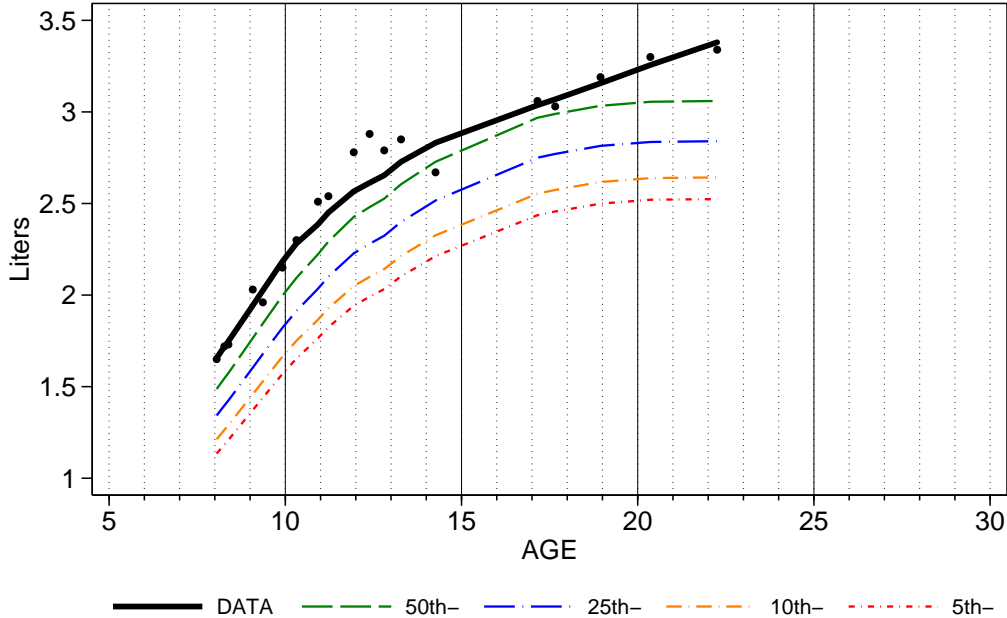

1492

**PATTERN OF GROWTH/DECLINE (Check One)**

- ( 1) Normal Growth
- ( 2) Normal Growth, Early Decline
- ( 3) Reduced Growth
- ( 4) Reduced Growth, Early Decline
- ( 9) Undetermined Pattern
- ( 8) Undetermined - not enough data

Maximum lung growth attained: ( 1) Yes ( 0) No

Plateau started: ( 2) No plateau ( 1) Yes ( 0) No

Decline started: ( 1) Yes ( 0) No

AGE AT each of the following periods (use '99' if N/A):

Maximum Lung Growth: \_\_\_\_ . \_\_\_\_

Start of Plateau: \_\_\_\_ . \_\_\_\_

Start of Decline: \_\_\_\_ . \_\_\_\_

### Pre-BD FEV1 Data and Percentiles: 1493

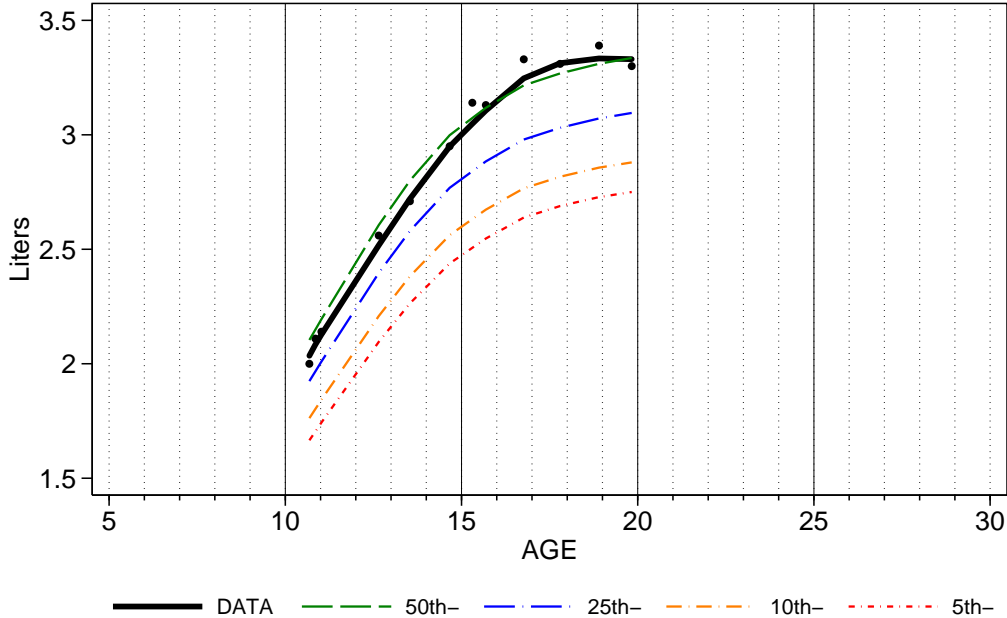

1493

**PATTERN OF GROWTH/DECLINE (Check One)**

- ( 1) Normal Growth
- ( 2) Normal Growth, Early Decline
- ( 3) Reduced Growth
- ( 4) Reduced Growth, Early Decline
- ( 9) Undetermined Pattern
- ( 8) Undetermined - not enough data

Maximum lung growth attained: ( 1) Yes ( 0) No

Plateau started: ( 2) No plateau ( 1) Yes ( 0) No

Decline started: ( 1) Yes ( 0) No

AGE AT each of the following periods (use '99' if N/A):

Maximum Lung Growth: \_\_\_\_ . \_\_\_\_

Start of Plateau: \_\_\_\_ . \_\_\_\_

Start of Decline: \_\_\_\_ . \_\_\_\_

### Pre-BD FEV1 Data and Percentiles: 1508

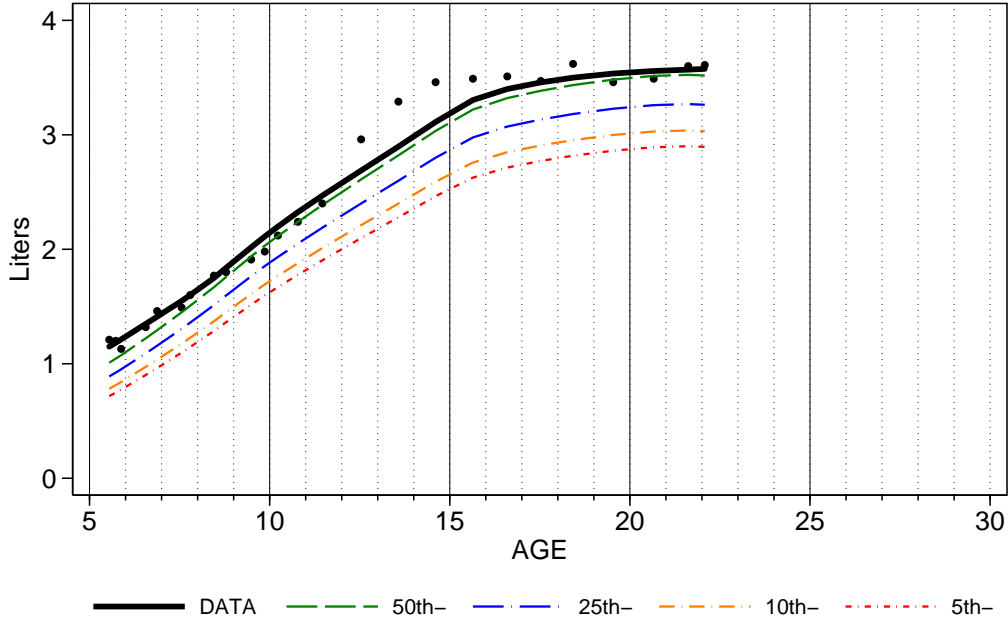

1508

**PATTERN OF GROWTH/DECLINE (Check One)**

- ( 1) Normal Growth
- ( 2) Normal Growth, Early Decline
- ( 3) Reduced Growth
- ( 4) Reduced Growth, Early Decline
- ( 9) Undetermined Pattern
- ( 8) Undetermined - not enough data

Maximum lung growth attained: ( 1) Yes ( 0) No

Plateau started: ( 2) No plateau ( 1) Yes ( 0) No

Decline started: ( 1) Yes ( 0) No

AGE AT each of the following periods (use '99' if N/A):

Maximum Lung Growth: \_\_\_\_ . \_\_\_\_

Start of Plateau: \_\_\_\_ . \_\_\_\_

Start of Decline: \_\_\_\_ . \_\_\_\_

### Pre-BD FEV1 Data and Percentiles: 1509

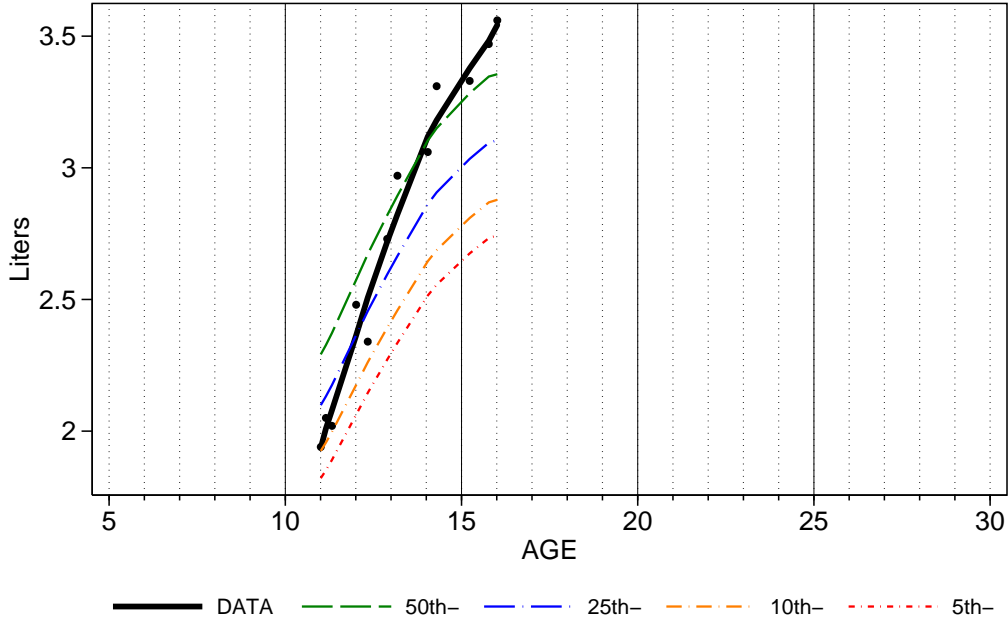

1509

**PATTERN OF GROWTH/DECLINE (Check One)**

- ( 1) Normal Growth
- ( 2) Normal Growth, Early Decline
- ( 3) Reduced Growth
- ( 4) Reduced Growth, Early Decline
- ( 9) Undetermined Pattern
- ( 8) Undetermined - not enough data

Maximum lung growth attained: ( 1) Yes ( 0) No

Plateau started: ( 2) No plateau ( 1) Yes ( 0) No

Decline started: ( 1) Yes ( 0) No

AGE AT each of the following periods (use '99' if N/A):

Maximum Lung Growth: \_\_\_\_ . \_\_\_\_

Start of Plateau: \_\_\_\_ . \_\_\_\_

Start of Decline: \_\_\_\_ . \_\_\_\_

### Pre-BD FEV1 Data and Percentiles: 1516

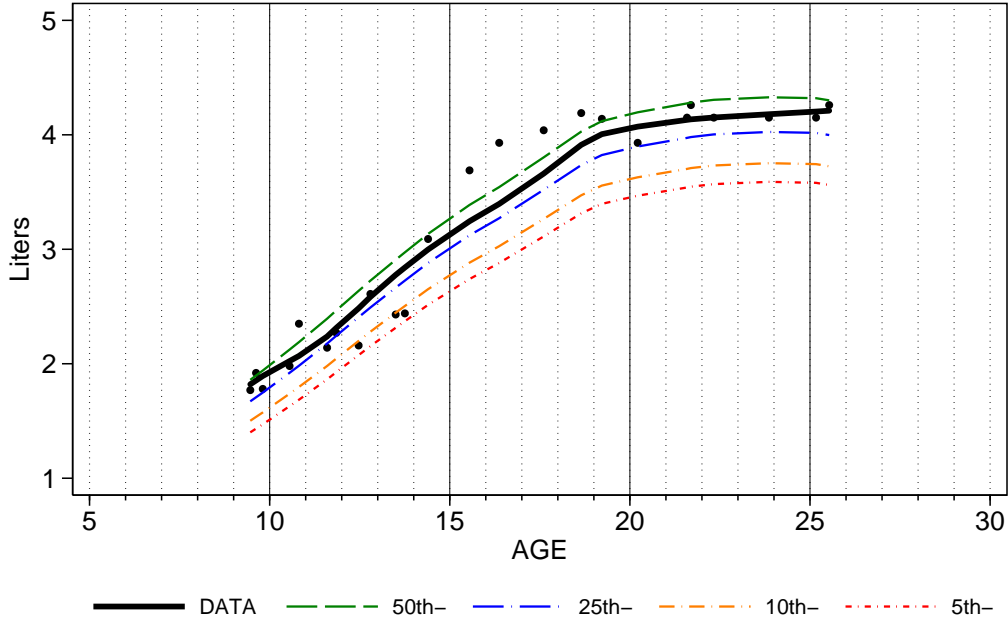

1516

**PATTERN OF GROWTH/DECLINE (Check One)**

- ( 1) Normal Growth
- ( 2) Normal Growth, Early Decline
- ( 3) Reduced Growth
- ( 4) Reduced Growth, Early Decline
- ( 9) Undetermined Pattern
- ( 8) Undetermined - not enough data

Maximum lung growth attained: ( 1) Yes ( 0) No

Plateau started: ( 2) No plateau ( 1) Yes ( 0) No

Decline started: ( 1) Yes ( 0) No

AGE AT each of the following periods (use '99' if N/A):

Maximum Lung Growth: \_\_\_\_ . \_\_\_\_

Start of Plateau: \_\_\_\_ . \_\_\_\_

Start of Decline: \_\_\_\_ . \_\_\_\_



### Pre-BD FEV1 Data and Percentiles: 1528

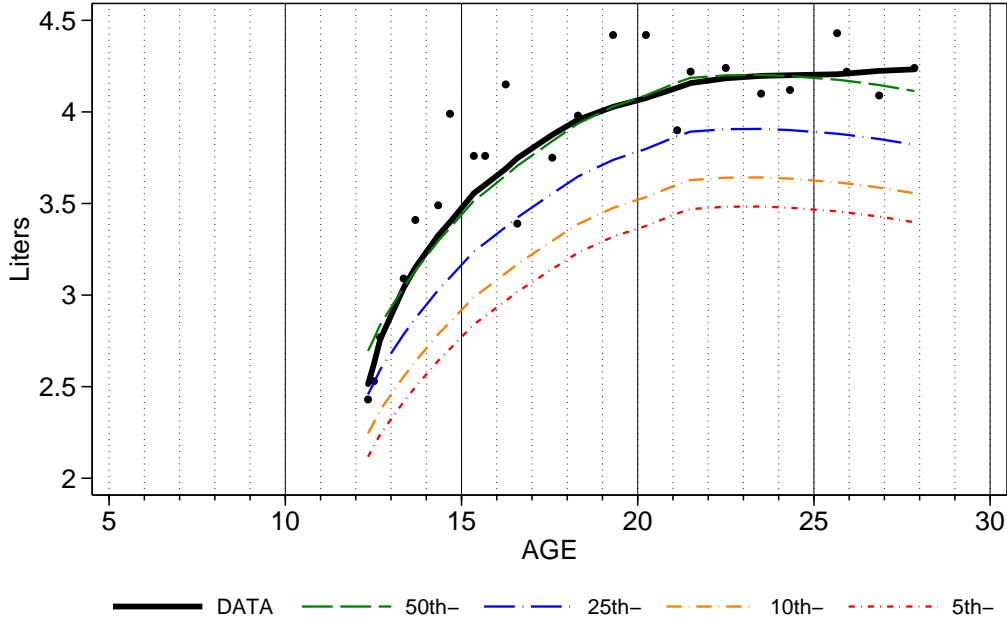

1528

**PATTERN OF GROWTH/DECLINE (Check One)**

- ( 1) Normal Growth
- ( 2) Normal Growth, Early Decline
- ( 3) Reduced Growth
- ( 4) Reduced Growth, Early Decline
- ( 9) Undetermined Pattern
- ( 8) Undetermined - not enough data

Maximum lung growth attained: ( 1) Yes ( 0) No

Plateau started: ( 2) No plateau ( 1) Yes ( 0) No

Decline started: ( 1) Yes ( 0) No

AGE AT each of the following periods (use '99' if N/A):

Maximum Lung Growth: \_\_\_\_ . \_\_\_\_

Start of Plateau: \_\_\_\_ . \_\_\_\_

Start of Decline: \_\_\_\_ . \_\_\_\_

### Pre-BD FEV1 Data and Percentiles: 1530

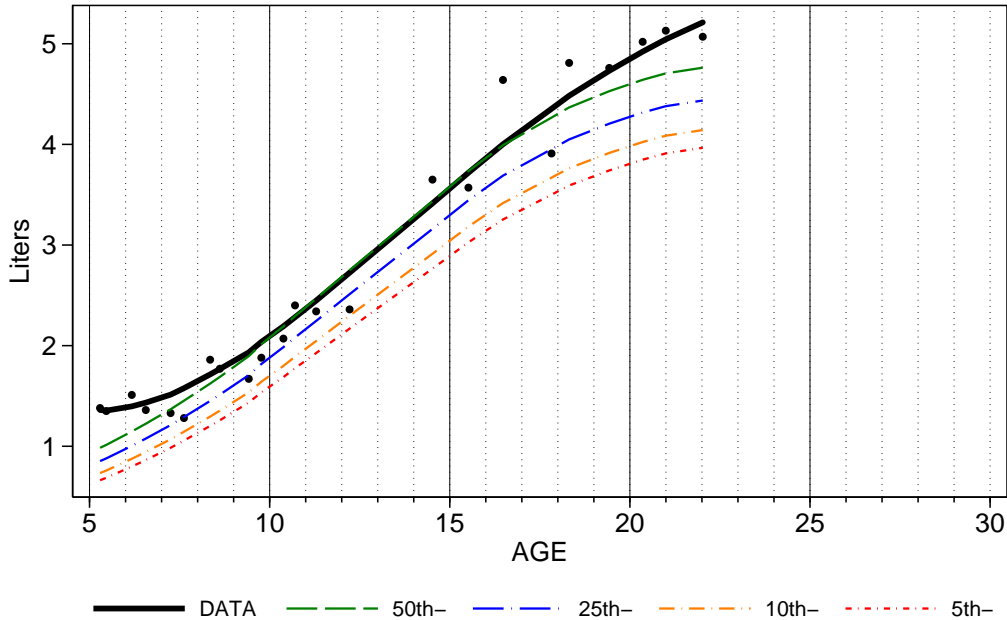

1530

**PATTERN OF GROWTH/DECLINE (Check One)**

- ( 1) Normal Growth
- ( 2) Normal Growth, Early Decline
- ( 3) Reduced Growth
- ( 4) Reduced Growth, Early Decline
- ( 9) Undetermined Pattern
- ( 8) Undetermined - not enough data

Maximum lung growth attained: ( 1) Yes ( 0) No

Plateau started: ( 2) No plateau ( 1) Yes ( 0) No

Decline started: ( 1) Yes ( 0) No

AGE AT each of the following periods (use '99' if N/A):

Maximum Lung Growth: \_\_\_\_ . \_\_\_\_

Start of Plateau: \_\_\_\_ . \_\_\_\_

Start of Decline: \_\_\_\_ . \_\_\_\_

### Pre-BD FEV1 Data and Percentiles: 1532

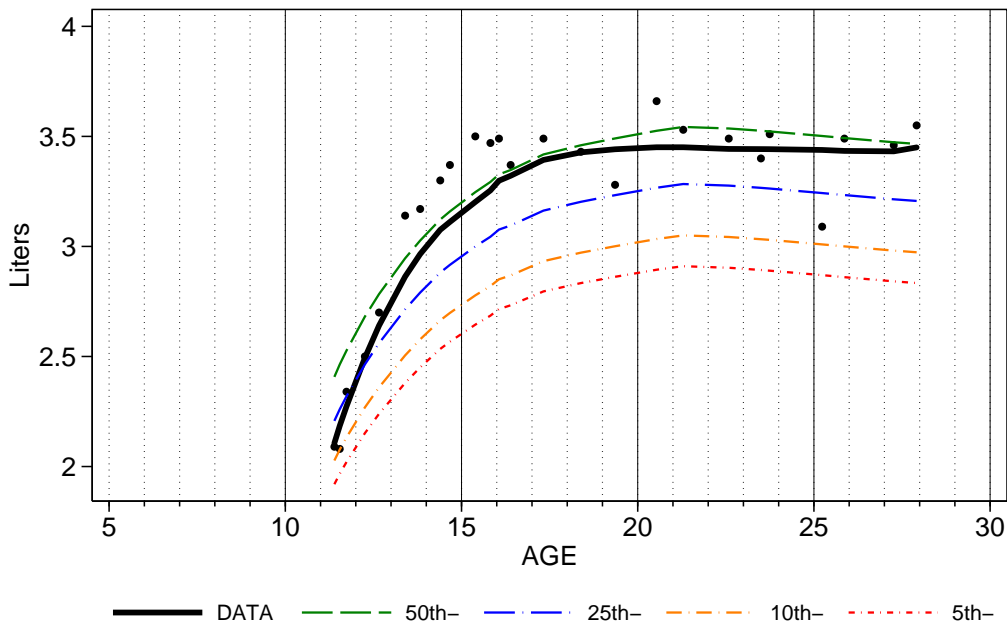

1532

**PATTERN OF GROWTH/DECLINE (Check One)**

- ( 1) Normal Growth
- ( 2) Normal Growth, Early Decline
- ( 3) Reduced Growth
- ( 4) Reduced Growth, Early Decline
- ( 9) Undetermined Pattern
- ( 8) Undetermined - not enough data

Maximum lung growth attained: ( 1) Yes ( 0) No

Plateau started: ( 2) No plateau ( 1) Yes ( 0) No

Decline started: ( 1) Yes ( 0) No

AGE AT each of the following periods (use '99' if N/A):

Maximum Lung Growth: \_\_\_\_ . \_\_\_\_

Start of Plateau: \_\_\_\_ . \_\_\_\_

Start of Decline: \_\_\_\_ . \_\_\_\_

### Pre-BD FEV1 Data and Percentiles: 1538

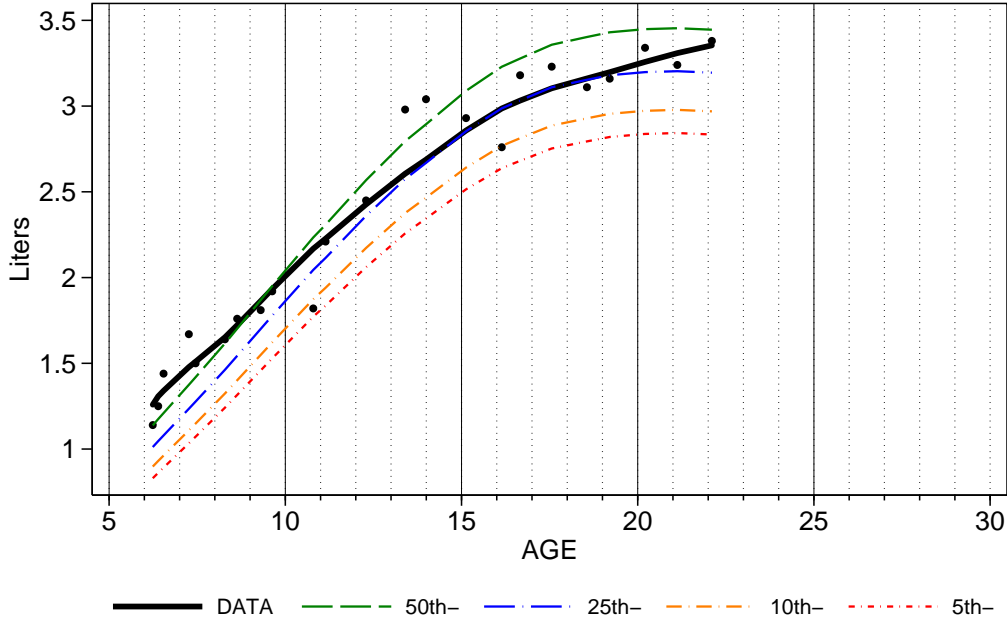

1538

**PATTERN OF GROWTH/DECLINE (Check One)**

- ( 1 ) Normal Growth
- ( 2 ) Normal Growth, Early Decline
- ( 3 ) Reduced Growth
- ( 4 ) Reduced Growth, Early Decline
- ( 9 ) Undetermined Pattern
- ( 8 ) Undetermined - not enough data

Maximum lung growth attained: ( 1 ) Yes ( 0 ) No

Plateau started: ( 2 ) No plateau ( 1 ) Yes ( 0 ) No

Decline started: ( 1 ) Yes ( 0 ) No

AGE AT each of the following periods (use '99' if N/A):

Maximum Lung Growth: \_\_\_\_ . \_\_\_\_

Start of Plateau: \_\_\_\_ . \_\_\_\_

Start of Decline: \_\_\_\_ . \_\_\_\_

### Pre-BD FEV1 Data and Percentiles: 1545

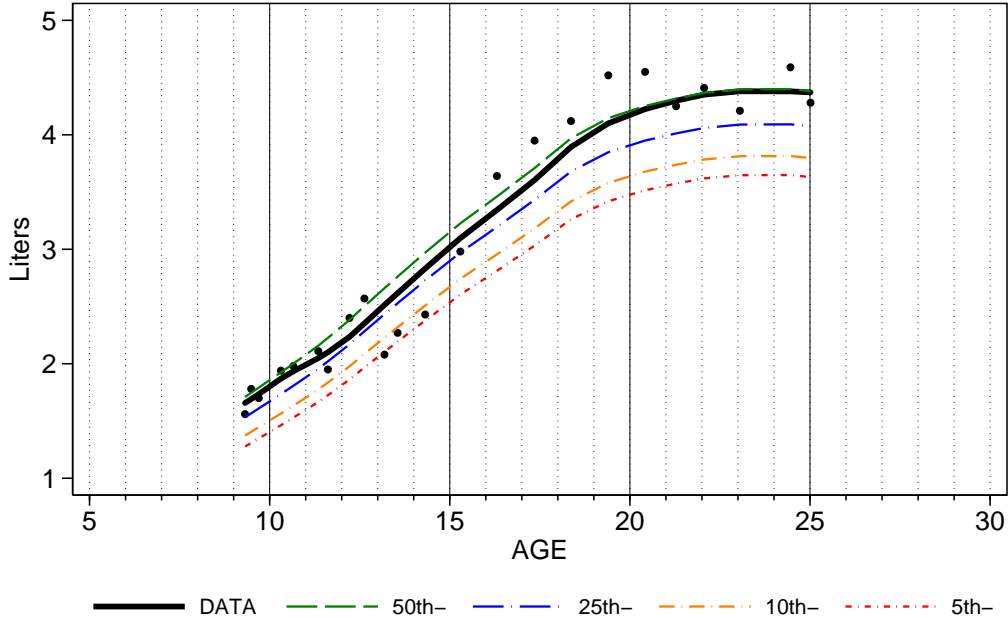

1545

**PATTERN OF GROWTH/DECLINE (Check One)**

- ( 1 ) Normal Growth
- ( 2 ) Normal Growth, Early Decline
- ( 3 ) Reduced Growth
- ( 4 ) Reduced Growth, Early Decline
- ( 9 ) Undetermined Pattern
- ( 8 ) Undetermined - not enough data

Maximum lung growth attained: ( 1 ) Yes ( 0 ) No

Plateau started: ( 2 ) No plateau ( 1 ) Yes ( 0 ) No

Decline started: ( 1 ) Yes ( 0 ) No

AGE AT each of the following periods (use '99' if N/A):

Maximum Lung Growth: \_\_\_\_ . \_\_\_\_

Start of Plateau: \_\_\_\_ . \_\_\_\_

Start of Decline: \_\_\_\_ . \_\_\_\_

### Pre-BD FEV1 Data and Percentiles: 1546

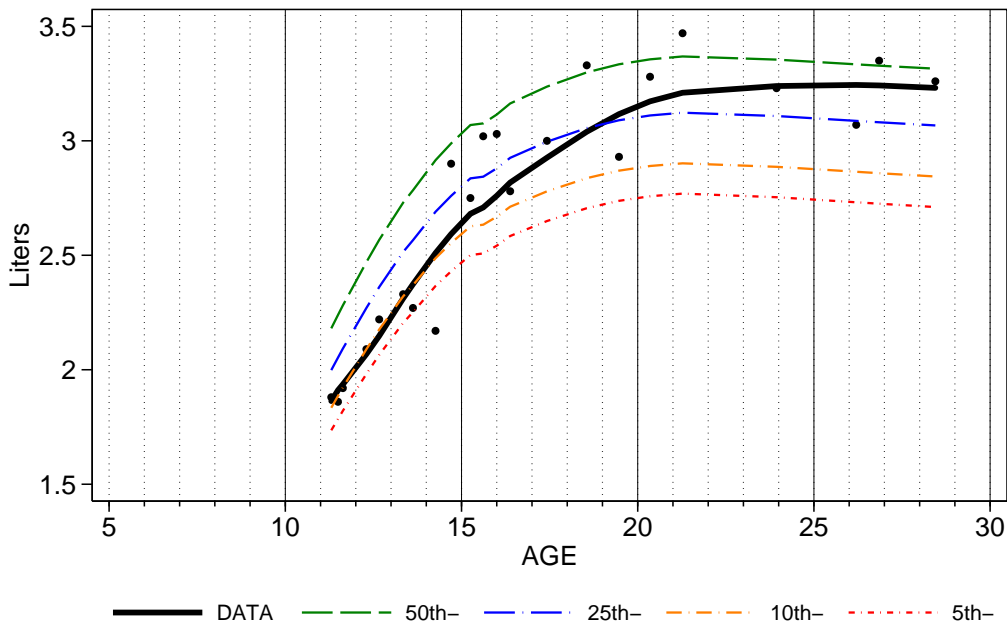

1546

**PATTERN OF GROWTH/DECLINE (Check One)**

- ( 1) Normal Growth
- ( 2) Normal Growth, Early Decline
- ( 3) Reduced Growth
- ( 4) Reduced Growth, Early Decline
- ( 9) Undetermined Pattern
- ( 8) Undetermined - not enough data

Maximum lung growth attained: ( 1) Yes ( 0) No

Plateau started: ( 2) No plateau ( 1) Yes ( 0) No

Decline started: ( 1) Yes ( 0) No

AGE AT each of the following periods (use '99' if N/A):

Maximum Lung Growth: \_\_\_\_ . \_\_\_\_

Start of Plateau: \_\_\_\_ . \_\_\_\_

Start of Decline: \_\_\_\_ . \_\_\_\_

### Pre-BD FEV1 Data and Percentiles: 1547

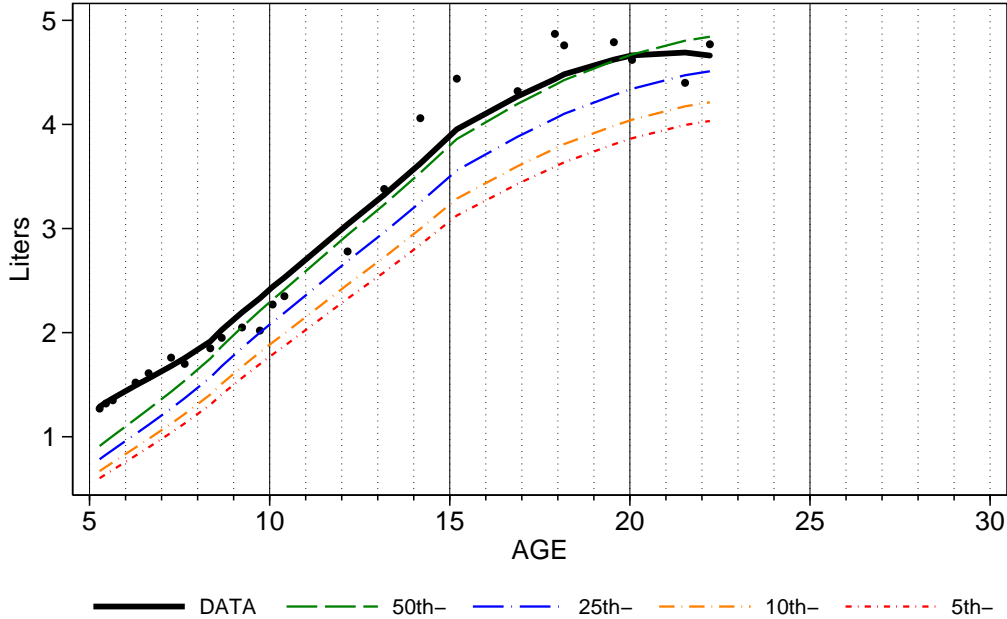

1547

**PATTERN OF GROWTH/DECLINE (Check One)**

- ( 1) Normal Growth
- ( 2) Normal Growth, Early Decline
- ( 3) Reduced Growth
- ( 4) Reduced Growth, Early Decline
- ( 9) Undetermined Pattern
- ( 8) Undetermined - not enough data

Maximum lung growth attained: ( 1) Yes ( 0) No

Plateau started: ( 2) No plateau ( 1) Yes ( 0) No

Decline started: ( 1) Yes ( 0) No

AGE AT each of the following periods (use '99' if N/A):

Maximum Lung Growth: \_\_\_\_ . \_\_\_\_

Start of Plateau: \_\_\_\_ . \_\_\_\_

Start of Decline: \_\_\_\_ . \_\_\_\_

### Pre-BD FEV1 Data and Percentiles: 1549

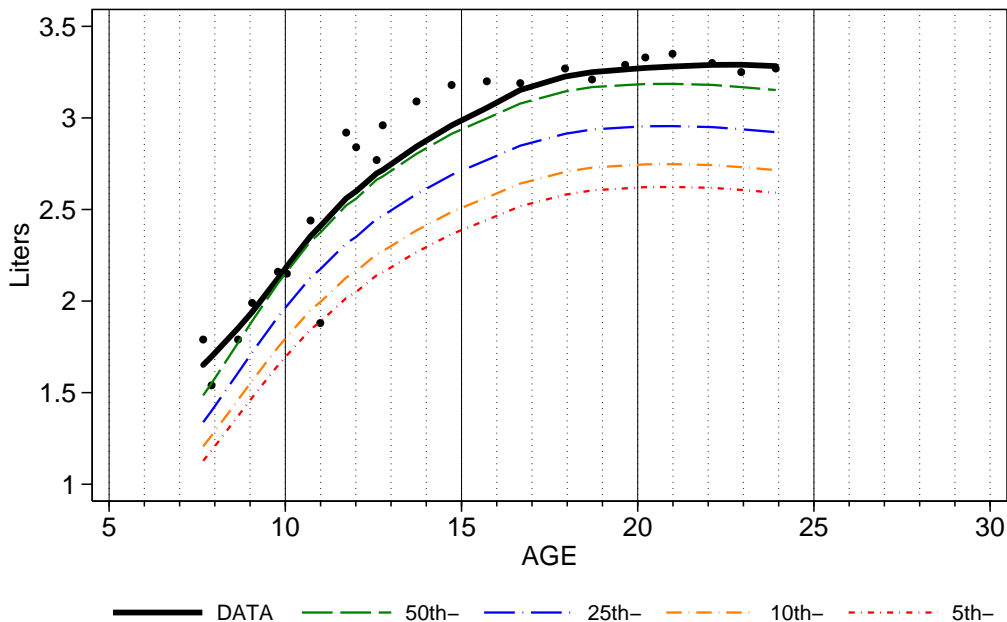

1549

**PATTERN OF GROWTH/DECLINE (Check One)**

- ( 1) Normal Growth
- ( 2) Normal Growth, Early Decline
- ( 3) Reduced Growth
- ( 4) Reduced Growth, Early Decline
- ( 9) Undetermined Pattern
- ( 8) Undetermined - not enough data

Maximum lung growth attained: ( 1) Yes ( 0) No

Plateau started: ( 2) No plateau ( 1) Yes ( 0) No

Decline started: ( 1) Yes ( 0) No

AGE AT each of the following periods (use '99' if N/A):

Maximum Lung Growth: \_\_\_\_ . \_\_\_\_

Start of Plateau: \_\_\_\_ . \_\_\_\_

Start of Decline: \_\_\_\_ . \_\_\_\_



### Pre-BD FEV1 Data and Percentiles: 1556

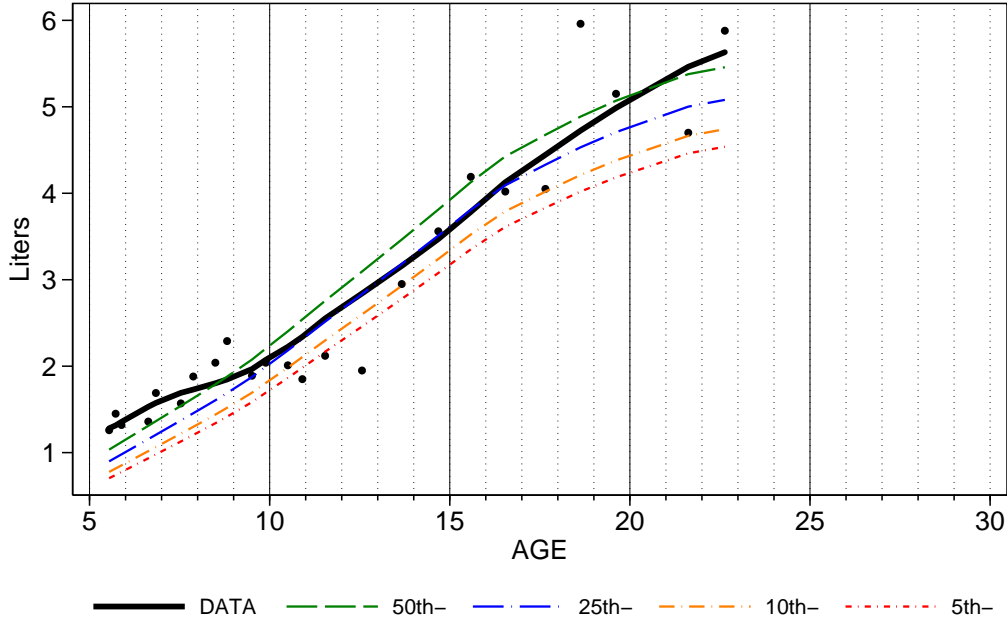

1556

**PATTERN OF GROWTH/DECLINE (Check One)**

- ( 1) Normal Growth
- ( 2) Normal Growth, Early Decline
- ( 3) Reduced Growth
- ( 4) Reduced Growth, Early Decline
- ( 9) Undetermined Pattern
- ( 8) Undetermined - not enough data

Maximum lung growth attained: ( 1) Yes ( 0) No

Plateau started: ( 2) No plateau ( 1) Yes ( 0) No

Decline started: ( 1) Yes ( 0) No

AGE AT each of the following periods (use '99' if N/A):

Maximum Lung Growth: \_\_\_\_ . \_\_\_\_

Start of Plateau: \_\_\_\_ . \_\_\_\_

Start of Decline: \_\_\_\_ . \_\_\_\_

### Pre-BD FEV1 Data and Percentiles: 1561

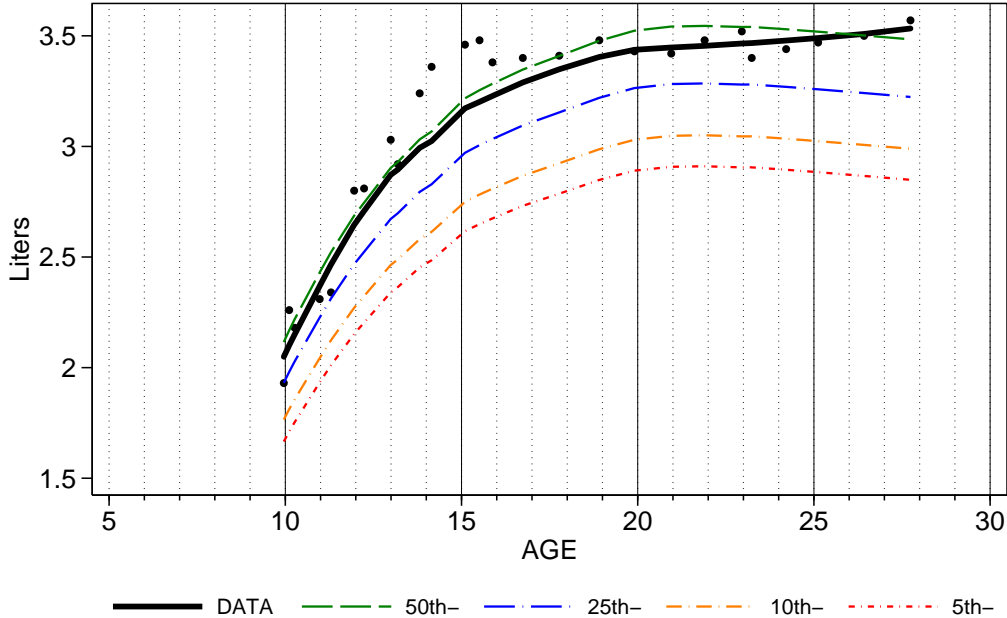

1561

**PATTERN OF GROWTH/DECLINE (Check One)**

- ( 1) Normal Growth
- ( 2) Normal Growth, Early Decline
- ( 3) Reduced Growth
- ( 4) Reduced Growth, Early Decline
- ( 9) Undetermined Pattern
- ( 8) Undetermined - not enough data

Maximum lung growth attained: ( 1) Yes ( 0) No

Plateau started: ( 2) No plateau ( 1) Yes ( 0) No

Decline started: ( 1) Yes ( 0) No

AGE AT each of the following periods (use '99' if N/A):

Maximum Lung Growth: \_\_\_\_ . \_\_\_\_

Start of Plateau: \_\_\_\_ . \_\_\_\_

Start of Decline: \_\_\_\_ . \_\_\_\_

### Pre-BD FEV1 Data and Percentiles: 1566

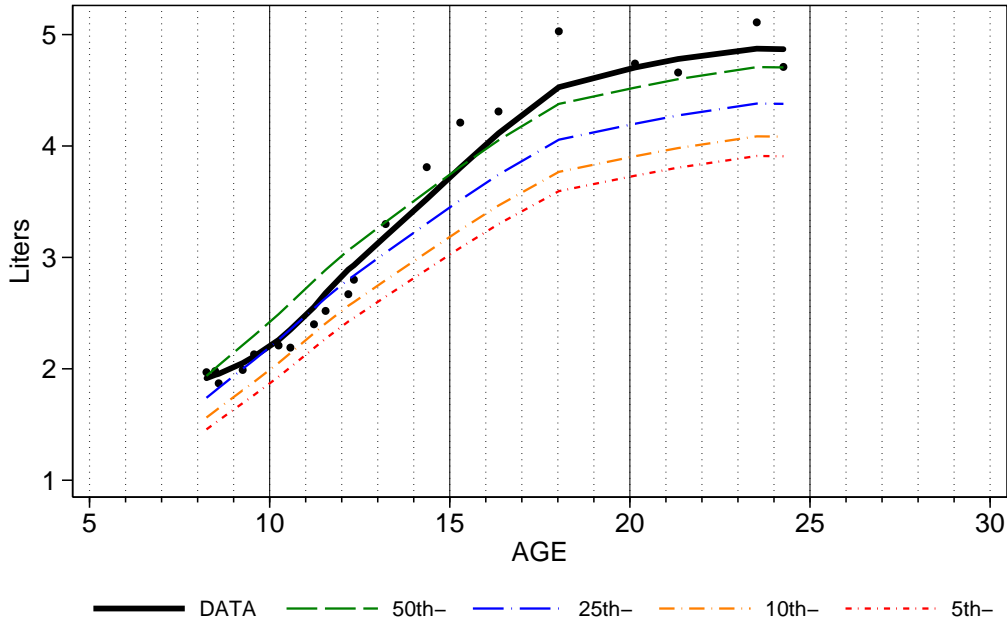

1566

**PATTERN OF GROWTH/DECLINE (Check One)**

- ( 1 ) Normal Growth
- ( 2 ) Normal Growth, Early Decline
- ( 3 ) Reduced Growth
- ( 4 ) Reduced Growth, Early Decline
- ( 9 ) Undetermined Pattern
- ( 8 ) Undetermined - not enough data

Maximum lung growth attained: ( 1 ) Yes ( 0 ) No

Plateau started: ( 2 ) No plateau ( 1 ) Yes ( 0 ) No

Decline started: ( 1 ) Yes ( 0 ) No

AGE AT each of the following periods (use '99' if N/A):

Maximum Lung Growth: \_\_\_\_ . \_\_\_\_

Start of Plateau: \_\_\_\_ . \_\_\_\_

Start of Decline: \_\_\_\_ . \_\_\_\_

### Pre-BD FEV1 Data and Percentiles: 1567

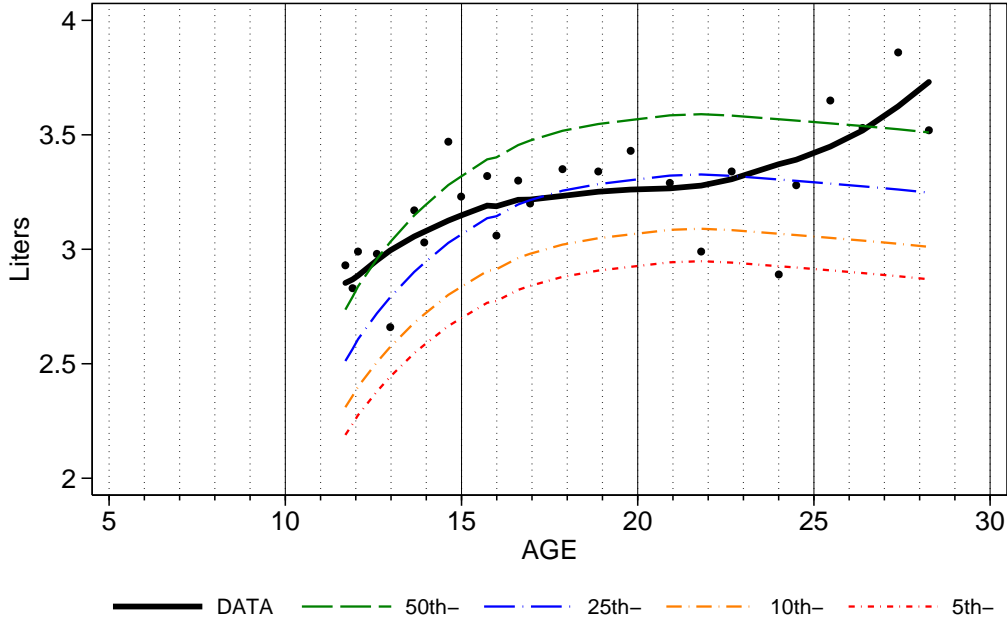

1567

**PATTERN OF GROWTH/DECLINE (Check One)**

- ( 1) Normal Growth
- ( 2) Normal Growth, Early Decline
- ( 3) Reduced Growth
- ( 4) Reduced Growth, Early Decline
- ( 9) Undetermined Pattern
- ( 8) Undetermined - not enough data

Maximum lung growth attained: ( 1) Yes ( 0) No

Plateau started: ( 2) No plateau ( 1) Yes ( 0) No

Decline started: ( 1) Yes ( 0) No

AGE AT each of the following periods (use '99' if N/A):

Maximum Lung Growth: \_\_\_\_ . \_\_\_\_

Start of Plateau: \_\_\_\_ . \_\_\_\_

Start of Decline: \_\_\_\_ . \_\_\_\_

### Pre-BD FEV1 Data and Percentiles: 1570

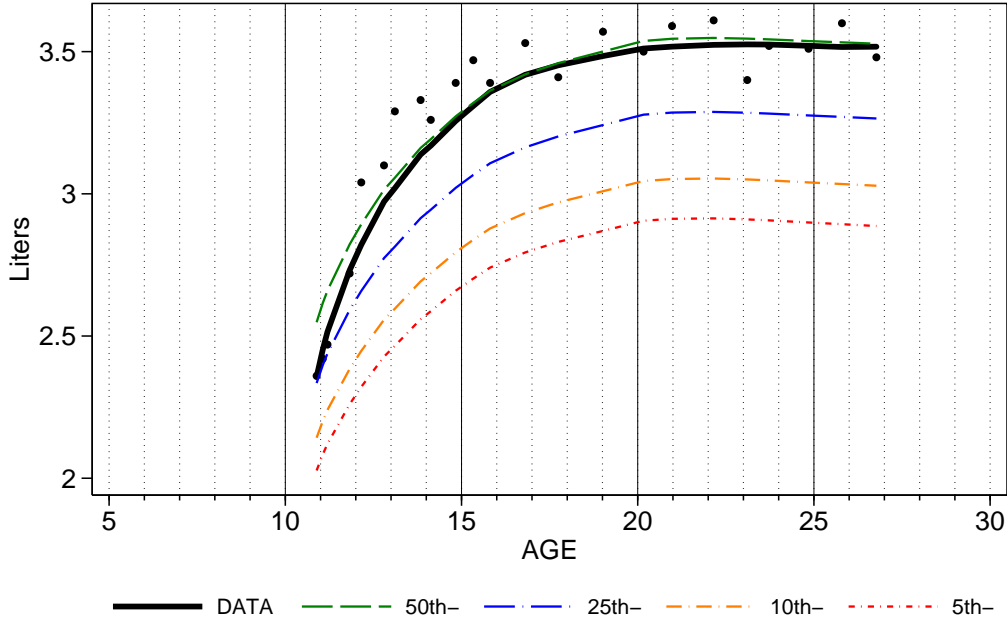

1570

**PATTERN OF GROWTH/DECLINE (Check One)**

- ( 1) Normal Growth
- ( 2) Normal Growth, Early Decline
- ( 3) Reduced Growth
- ( 4) Reduced Growth, Early Decline
- ( 9) Undetermined Pattern
- ( 8) Undetermined - not enough data

Maximum lung growth attained: ( 1) Yes ( 0) No

Plateau started: ( 2) No plateau ( 1) Yes ( 0) No

Decline started: ( 1) Yes ( 0) No

AGE AT each of the following periods (use '99' if N/A):

Maximum Lung Growth: \_\_\_\_ . \_\_\_\_

Start of Plateau: \_\_\_\_ . \_\_\_\_

Start of Decline: \_\_\_\_ . \_\_\_\_

### Pre-BD FEV1 Data and Percentiles: 1578

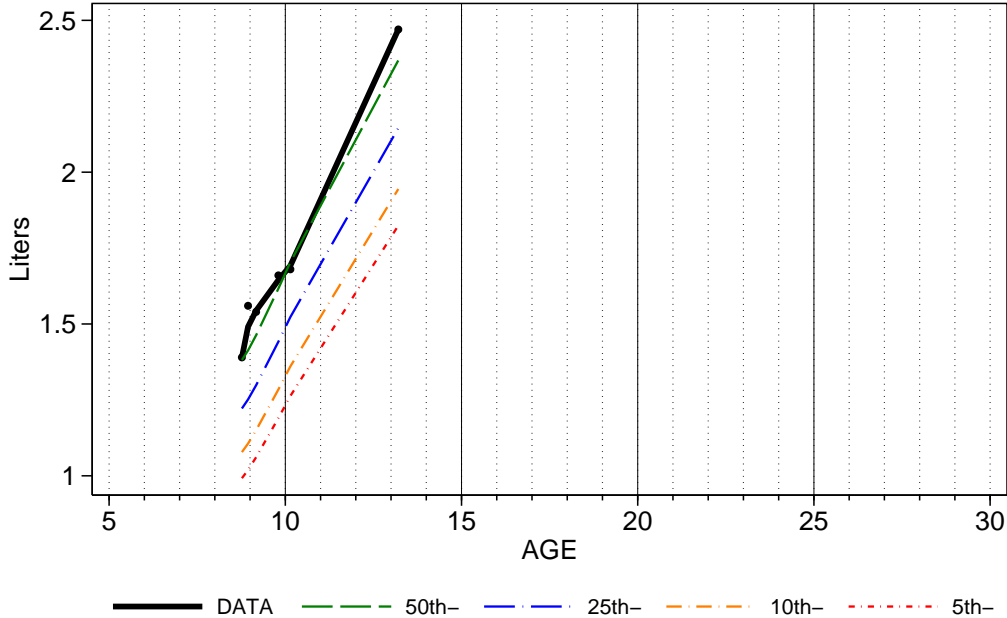

1578

**PATTERN OF GROWTH/DECLINE (Check One)**

- ( 1 ) Normal Growth
- ( 2 ) Normal Growth, Early Decline
- ( 3 ) Reduced Growth
- ( 4 ) Reduced Growth, Early Decline
- ( 9 ) Undetermined Pattern
- ( 8 ) Undetermined - not enough data

Maximum lung growth attained: ( 1 ) Yes ( 0 ) No

Plateau started: ( 2 ) No plateau ( 1 ) Yes ( 0 ) No

Decline started: ( 1 ) Yes ( 0 ) No

AGE AT each of the following periods (use '99' if N/A):

Maximum Lung Growth: \_\_\_\_ . \_\_\_\_

Start of Plateau: \_\_\_\_ . \_\_\_\_

Start of Decline: \_\_\_\_ . \_\_\_\_

### Pre-BD FEV1 Data and Percentiles: 1580

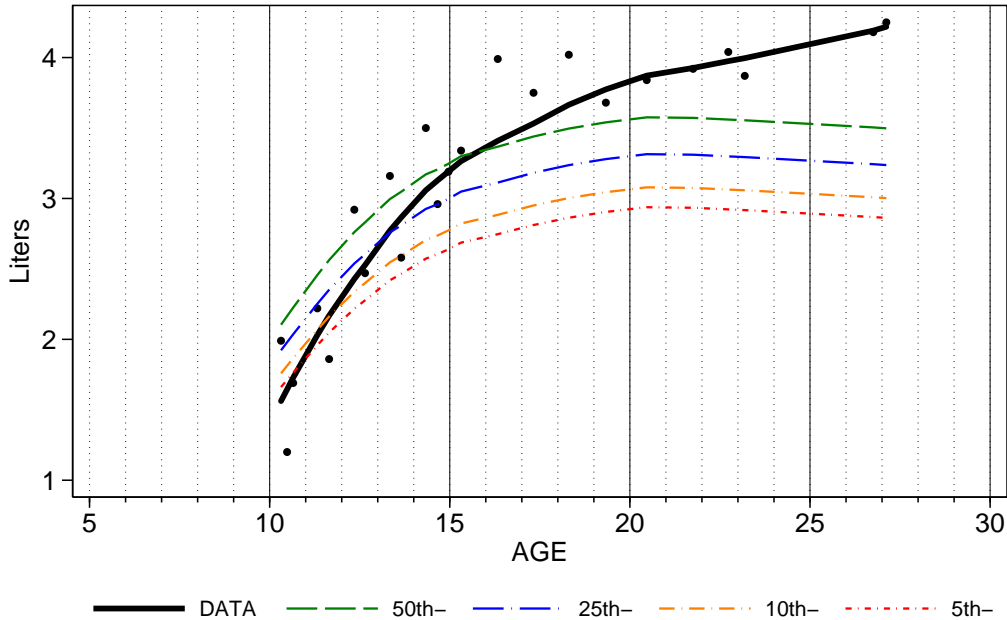

1580

**PATTERN OF GROWTH/DECLINE (Check One)**

- ( 1) Normal Growth
- ( 2) Normal Growth, Early Decline
- ( 3) Reduced Growth
- ( 4) Reduced Growth, Early Decline
- ( 9) Undetermined Pattern
- ( 8) Undetermined - not enough data

Maximum lung growth attained: ( 1) Yes ( 0) No

Plateau started: ( 2) No plateau ( 1) Yes ( 0) No

Decline started: ( 1) Yes ( 0) No

AGE AT each of the following periods (use '99' if N/A):

Maximum Lung Growth: \_\_\_\_ . \_\_\_\_

Start of Plateau: \_\_\_\_ . \_\_\_\_

Start of Decline: \_\_\_\_ . \_\_\_\_

### Pre-BD FEV1 Data and Percentiles: 1585

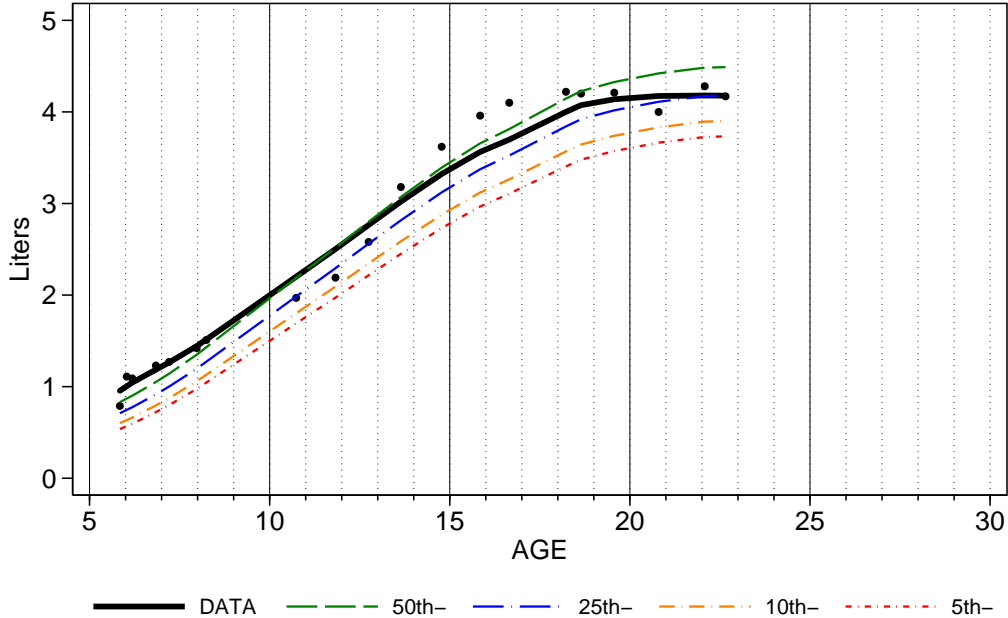

1585

**PATTERN OF GROWTH/DECLINE (Check One)**

- ( 1 ) Normal Growth
- ( 2 ) Normal Growth, Early Decline
- ( 3 ) Reduced Growth
- ( 4 ) Reduced Growth, Early Decline
- ( 9 ) Undetermined Pattern
- ( 8 ) Undetermined - not enough data

Maximum lung growth attained: ( 1 ) Yes ( 0 ) No

Plateau started: ( 2 ) No plateau ( 1 ) Yes ( 0 ) No

Decline started: ( 1 ) Yes ( 0 ) No

AGE AT each of the following periods (use '99' if N/A):

Maximum Lung Growth: \_\_\_\_ . \_\_\_\_

Start of Plateau: \_\_\_\_ . \_\_\_\_

Start of Decline: \_\_\_\_ . \_\_\_\_



### Pre-BD FEV1 Data and Percentiles: 1586

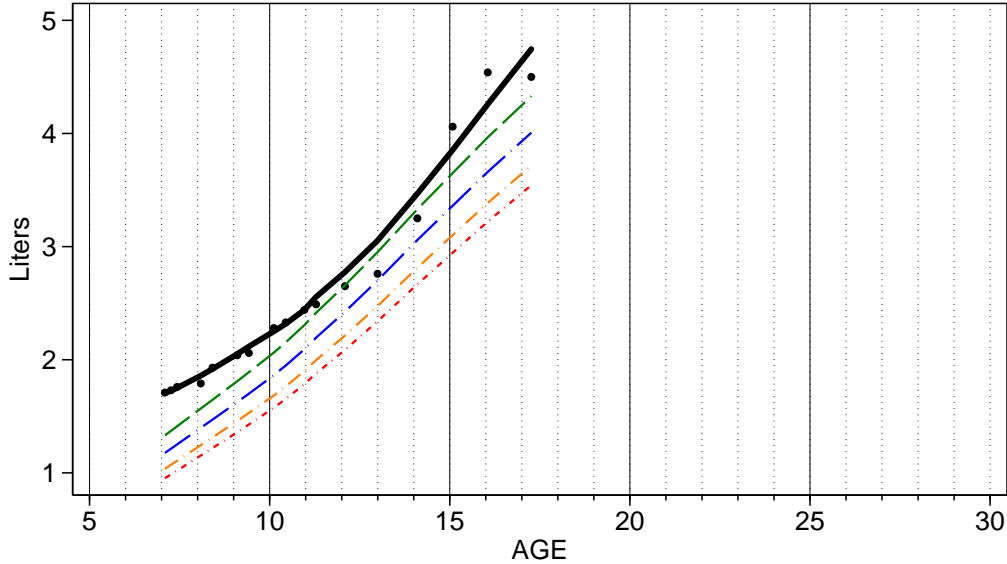

DATA  
  50th-  
  25th-  
  10th-  
  5th-

1586

**PATTERN OF GROWTH/DECLINE (Check One)**

- ( 1) Normal Growth
- ( 2) Normal Growth, Early Decline
- ( 3) Reduced Growth
- ( 4) Reduced Growth, Early Decline
- ( 9) Undetermined Pattern
- ( 8) Undetermined - not enough data

Maximum lung growth attained: ( 1) Yes ( 0) No

Plateau started: ( 2) No plateau ( 1) Yes ( 0) No

Decline started: ( 1) Yes ( 0) No

AGE AT each of the following periods (use '99' if N/A):

Maximum Lung Growth: \_\_\_\_ . \_\_\_\_

Start of Plateau: \_\_\_\_ . \_\_\_\_

Start of Decline: \_\_\_\_ . \_\_\_\_

### Pre-BD FEV1 Data and Percentiles: 1592

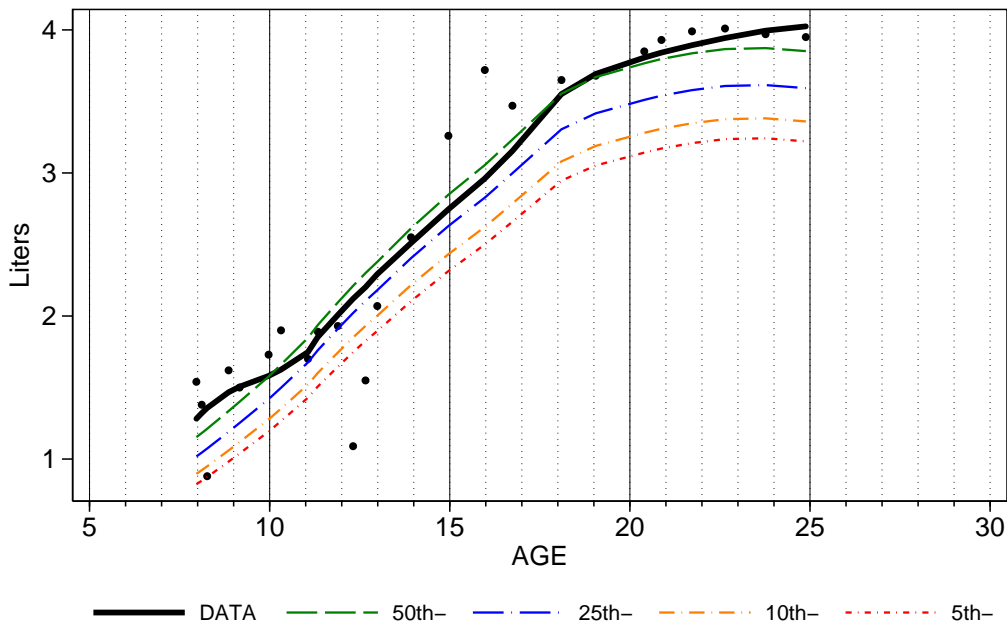

1592

**PATTERN OF GROWTH/DECLINE (Check One)**

- ( 1 ) Normal Growth
- ( 2 ) Normal Growth, Early Decline
- ( 3 ) Reduced Growth
- ( 4 ) Reduced Growth, Early Decline
- ( 9 ) Undetermined Pattern
- ( 8 ) Undetermined - not enough data

Maximum lung growth attained: ( 1 ) Yes ( 0 ) No

Plateau started: ( 2 ) No plateau ( 1 ) Yes ( 0 ) No

Decline started: ( 1 ) Yes ( 0 ) No

AGE AT each of the following periods (use '99' if N/A):

Maximum Lung Growth: \_\_\_\_ . \_\_\_\_

Start of Plateau: \_\_\_\_ . \_\_\_\_

Start of Decline: \_\_\_\_ . \_\_\_\_

### Pre-BD FEV1 Data and Percentiles: 1593

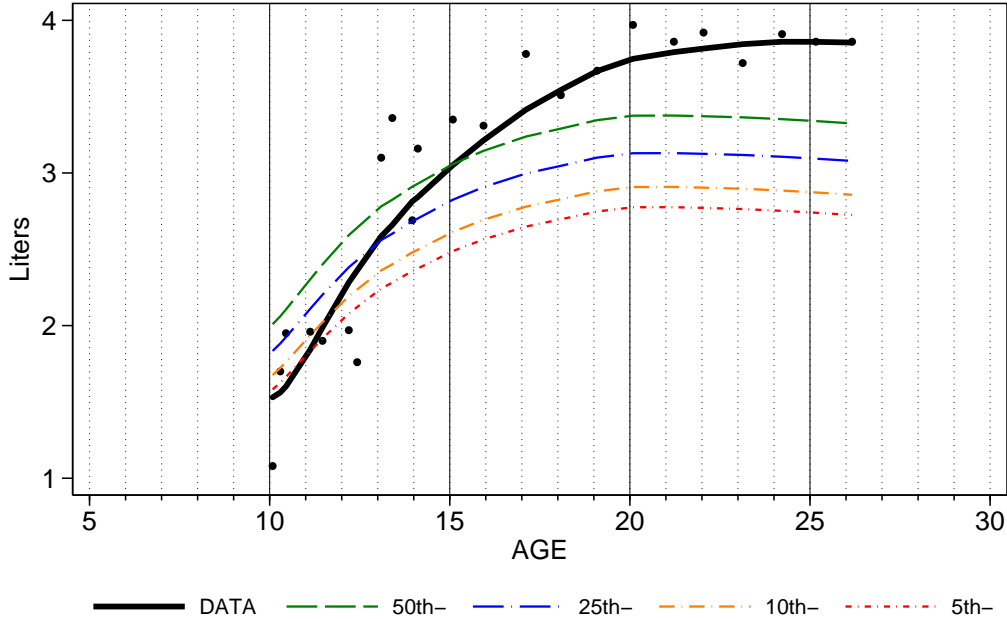

1593

**PATTERN OF GROWTH/DECLINE (Check One)**

- ( 1) Normal Growth
- ( 2) Normal Growth, Early Decline
- ( 3) Reduced Growth
- ( 4) Reduced Growth, Early Decline
- ( 9) Undetermined Pattern
- ( 8) Undetermined - not enough data

Maximum lung growth attained: ( 1) Yes ( 0) No

Plateau started: ( 2) No plateau ( 1) Yes ( 0) No

Decline started: ( 1) Yes ( 0) No

AGE AT each of the following periods (use '99' if N/A):

Maximum Lung Growth: \_\_\_\_ . \_\_\_\_

Start of Plateau: \_\_\_\_ . \_\_\_\_

Start of Decline: \_\_\_\_ . \_\_\_\_

### Pre-BD FEV1 Data and Percentiles: 1599

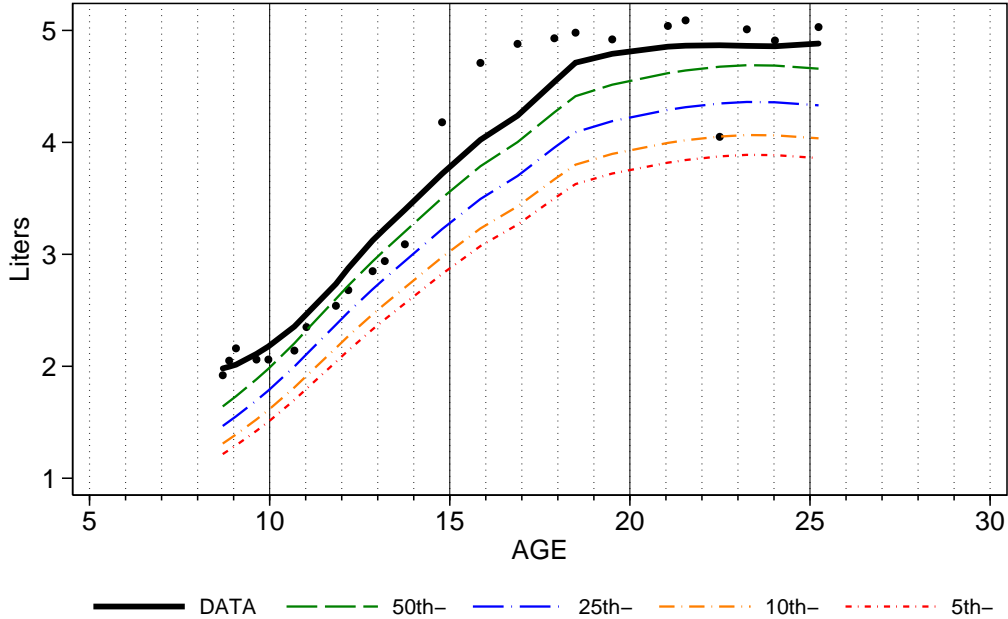

1599

**PATTERN OF GROWTH/DECLINE (Check One)**

- ( 1 ) Normal Growth
- ( 2 ) Normal Growth, Early Decline
- ( 3 ) Reduced Growth
- ( 4 ) Reduced Growth, Early Decline
- ( 9 ) Undetermined Pattern
- ( 8 ) Undetermined - not enough data

Maximum lung growth attained: ( 1 ) Yes ( 0 ) No

Plateau started: ( 2 ) No plateau ( 1 ) Yes ( 0 ) No

Decline started: ( 1 ) Yes ( 0 ) No

AGE AT each of the following periods (use '99' if N/A):

Maximum Lung Growth: \_\_\_\_ . \_\_\_\_

Start of Plateau: \_\_\_\_ . \_\_\_\_

Start of Decline: \_\_\_\_ . \_\_\_\_

### Pre-BD FEV1 Data and Percentiles: 1604

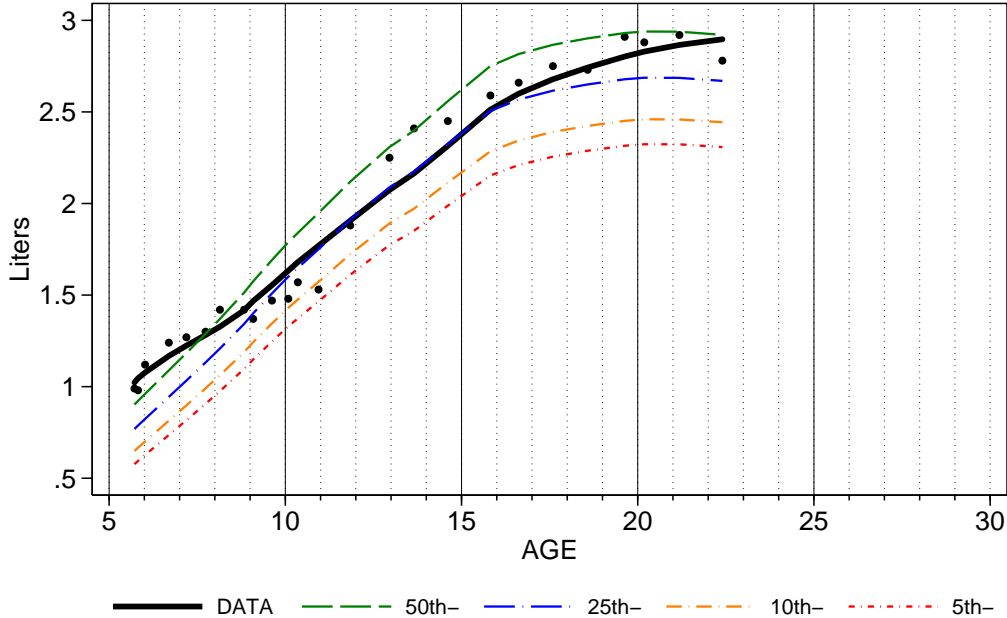

1604

**PATTERN OF GROWTH/DECLINE (Check One)**

- ( 1) Normal Growth
- ( 2) Normal Growth, Early Decline
- ( 3) Reduced Growth
- ( 4) Reduced Growth, Early Decline
- ( 9) Undetermined Pattern
- ( 8) Undetermined - not enough data

Maximum lung growth attained: ( 1) Yes ( 0) No

Plateau started: ( 2) No plateau ( 1) Yes ( 0) No

Decline started: ( 1) Yes ( 0) No

AGE AT each of the following periods (use '99' if N/A):

Maximum Lung Growth: \_\_\_\_ . \_\_\_\_

Start of Plateau: \_\_\_\_ . \_\_\_\_

Start of Decline: \_\_\_\_ . \_\_\_\_

### Pre-BD FEV1 Data and Percentiles: 1605

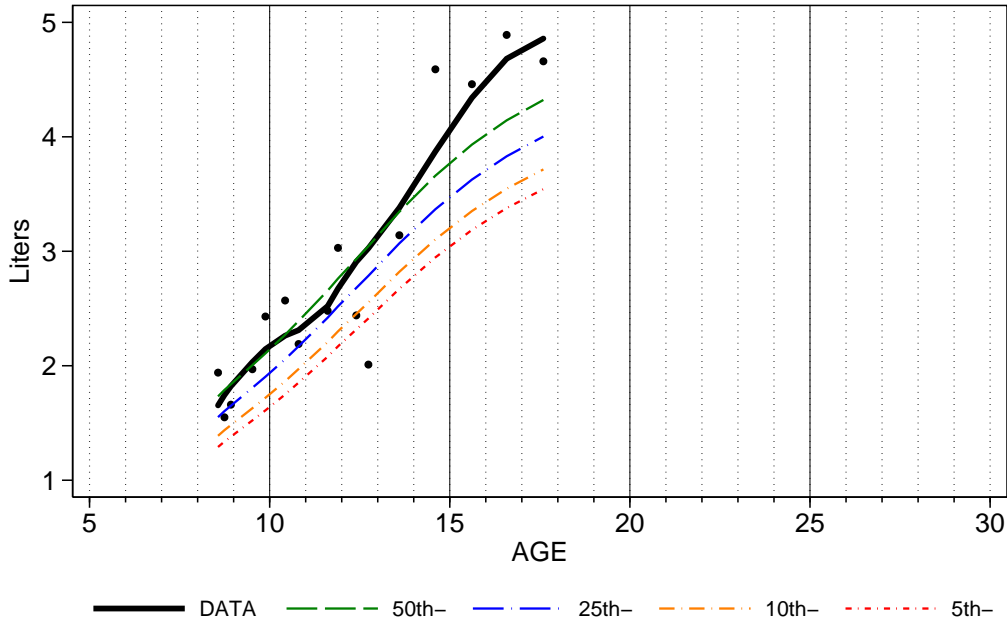

1605

**PATTERN OF GROWTH/DECLINE (Check One)**

- ( 1 ) Normal Growth
- ( 2 ) Normal Growth, Early Decline
- ( 3 ) Reduced Growth
- ( 4 ) Reduced Growth, Early Decline
- ( 9 ) Undetermined Pattern
- ( 8 ) Undetermined - not enough data

Maximum lung growth attained: ( 1 ) Yes ( 0 ) No

Plateau started: ( 2 ) No plateau ( 1 ) Yes ( 0 ) No

Decline started: ( 1 ) Yes ( 0 ) No

AGE AT each of the following periods (use '99' if N/A):

Maximum Lung Growth: \_\_\_\_ . \_\_\_\_

Start of Plateau: \_\_\_\_ . \_\_\_\_

Start of Decline: \_\_\_\_ . \_\_\_\_

### Pre-BD FEV1 Data and Percentiles: 1606

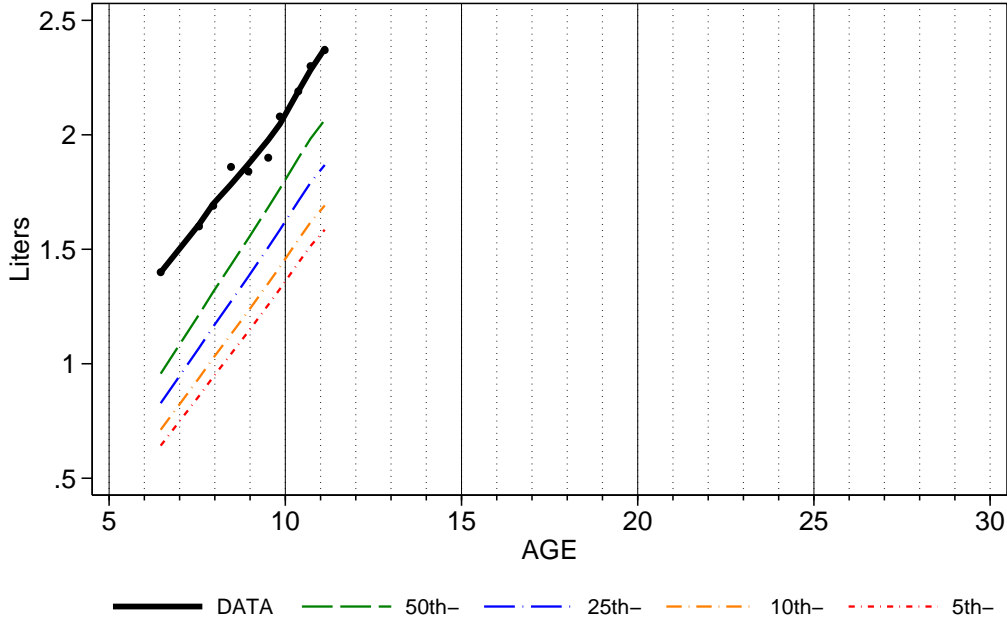

1606

**PATTERN OF GROWTH/DECLINE (Check One)**

- ( 1) Normal Growth
- ( 2) Normal Growth, Early Decline
- ( 3) Reduced Growth
- ( 4) Reduced Growth, Early Decline
- ( 9) Undetermined Pattern
- ( 8) Undetermined - not enough data

Maximum lung growth attained: ( 1) Yes ( 0) No

Plateau started: ( 2) No plateau ( 1) Yes ( 0) No

Decline started: ( 1) Yes ( 0) No

AGE AT each of the following periods (use '99' if N/A):

Maximum Lung Growth: \_\_\_\_ . \_\_\_\_

Start of Plateau: \_\_\_\_ . \_\_\_\_

Start of Decline: \_\_\_\_ . \_\_\_\_

### Pre-BD FEV1 Data and Percentiles: 1607

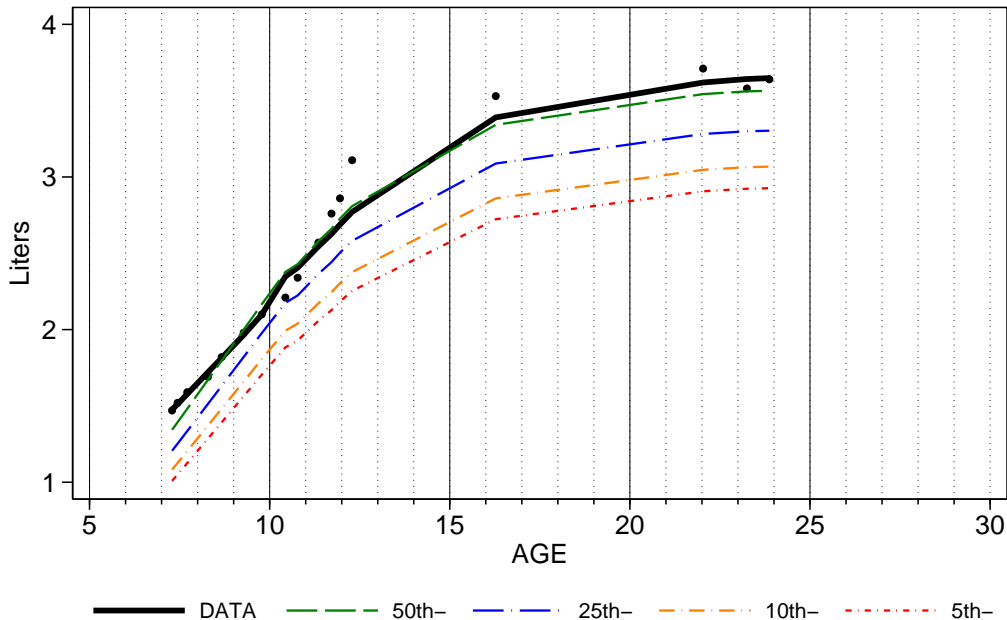

1607

**PATTERN OF GROWTH/DECLINE (Check One)**

- ( 1 ) Normal Growth
- ( 2 ) Normal Growth, Early Decline
- ( 3 ) Reduced Growth
- ( 4 ) Reduced Growth, Early Decline
- ( 9 ) Undetermined Pattern
- ( 8 ) Undetermined - not enough data

Maximum lung growth attained: ( 1 ) Yes ( 0 ) No

Plateau started: ( 2 ) No plateau ( 1 ) Yes ( 0 ) No

Decline started: ( 1 ) Yes ( 0 ) No

AGE AT each of the following periods (use '99' if N/A):

Maximum Lung Growth: \_\_\_\_ . \_\_\_\_

Start of Plateau: \_\_\_\_ . \_\_\_\_

Start of Decline: \_\_\_\_ . \_\_\_\_



### Pre-BD FEV1 Data and Percentiles: 1609

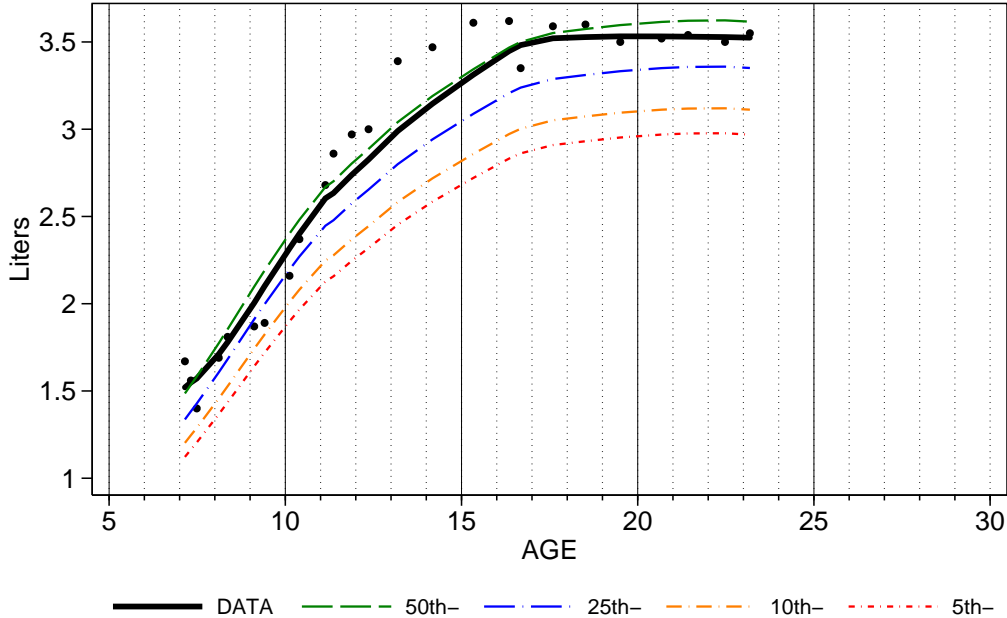

1609

**PATTERN OF GROWTH/DECLINE (Check One)**

- ( 1 ) Normal Growth
- ( 2 ) Normal Growth, Early Decline
- ( 3 ) Reduced Growth
- ( 4 ) Reduced Growth, Early Decline
- ( 9 ) Undetermined Pattern
- ( 8 ) Undetermined - not enough data

Maximum lung growth attained: ( 1 ) Yes ( 0 ) No

Plateau started: ( 2 ) No plateau ( 1 ) Yes ( 0 ) No

Decline started: ( 1 ) Yes ( 0 ) No

AGE AT each of the following periods (use '99' if N/A):

Maximum Lung Growth: \_\_\_\_ . \_\_\_\_

Start of Plateau: \_\_\_\_ . \_\_\_\_

Start of Decline: \_\_\_\_ . \_\_\_\_

### Pre-BD FEV1 Data and Percentiles: 1616

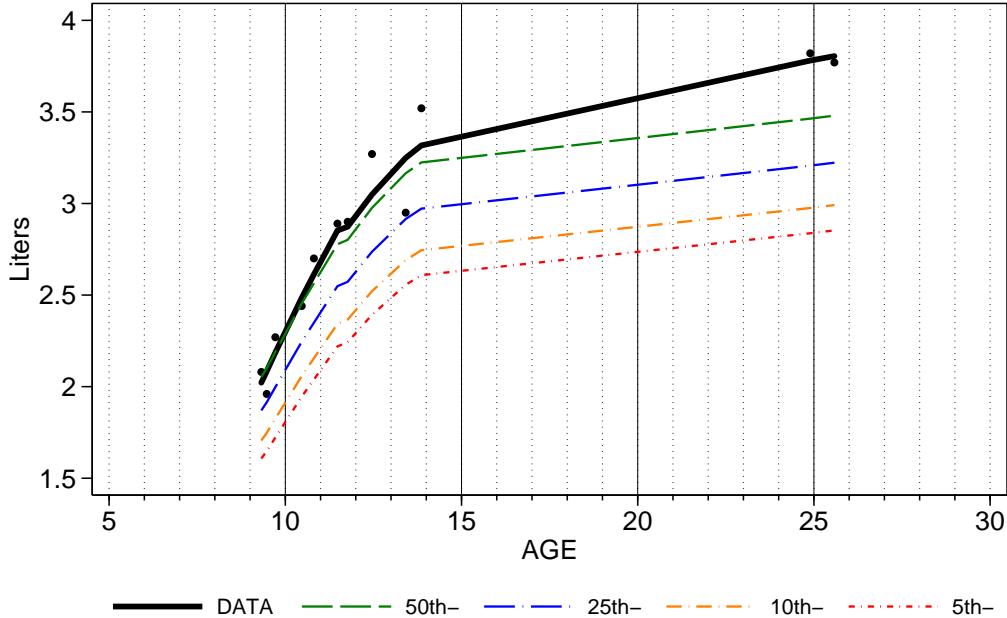

1616

**PATTERN OF GROWTH/DECLINE (Check One)**

- ( 1 ) Normal Growth
- ( 2 ) Normal Growth, Early Decline
- ( 3 ) Reduced Growth
- ( 4 ) Reduced Growth, Early Decline
- ( 9 ) Undetermined Pattern
- ( 8 ) Undetermined - not enough data

Maximum lung growth attained: ( 1 ) Yes ( 0 ) No

Plateau started: ( 2 ) No plateau ( 1 ) Yes ( 0 ) No

Decline started: ( 1 ) Yes ( 0 ) No

AGE AT each of the following periods (use '99' if N/A):

Maximum Lung Growth: \_\_\_\_ . \_\_\_\_

Start of Plateau: \_\_\_\_ . \_\_\_\_

Start of Decline: \_\_\_\_ . \_\_\_\_

### Pre-BD FEV1 Data and Percentiles: 1619

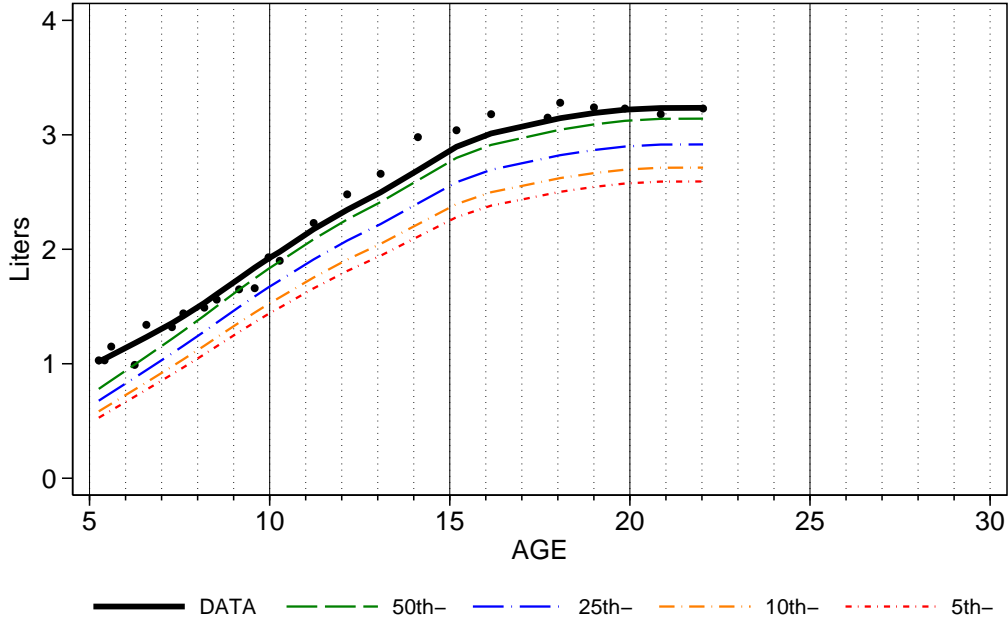

1619

**PATTERN OF GROWTH/DECLINE (Check One)**

- ( 1) Normal Growth
- ( 2) Normal Growth, Early Decline
- ( 3) Reduced Growth
- ( 4) Reduced Growth, Early Decline
- ( 9) Undetermined Pattern
- ( 8) Undetermined - not enough data

Maximum lung growth attained: ( 1) Yes ( 0) No

Plateau started: ( 2) No plateau ( 1) Yes ( 0) No

Decline started: ( 1) Yes ( 0) No

AGE AT each of the following periods (use '99' if N/A):

Maximum Lung Growth: \_\_\_\_ . \_\_\_\_

Start of Plateau: \_\_\_\_ . \_\_\_\_

Start of Decline: \_\_\_\_ . \_\_\_\_

### Pre-BD FEV1 Data and Percentiles: 1627

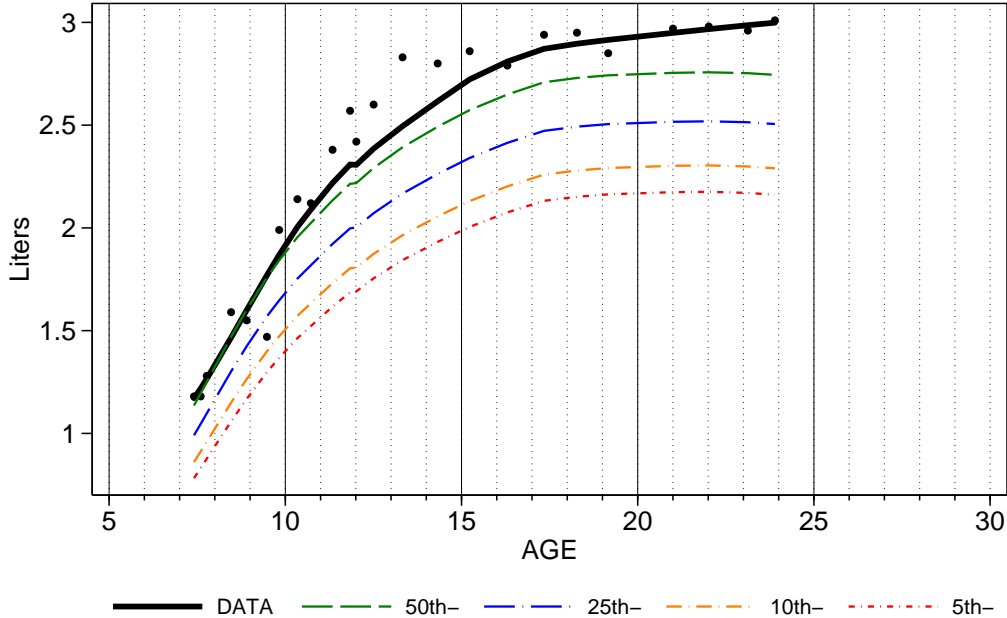

1627

**PATTERN OF GROWTH/DECLINE (Check One)**

- ( 1 ) Normal Growth
- ( 2 ) Normal Growth, Early Decline
- ( 3 ) Reduced Growth
- ( 4 ) Reduced Growth, Early Decline
- ( 9 ) Undetermined Pattern
- ( 8 ) Undetermined - not enough data

Maximum lung growth attained: ( 1 ) Yes ( 0 ) No

Plateau started: ( 2 ) No plateau ( 1 ) Yes ( 0 ) No

Decline started: ( 1 ) Yes ( 0 ) No

AGE AT each of the following periods (use '99' if N/A):

Maximum Lung Growth: \_\_\_\_ . \_\_\_\_

Start of Plateau: \_\_\_\_ . \_\_\_\_

Start of Decline: \_\_\_\_ . \_\_\_\_

### Pre-BD FEV1 Data and Percentiles: 1630

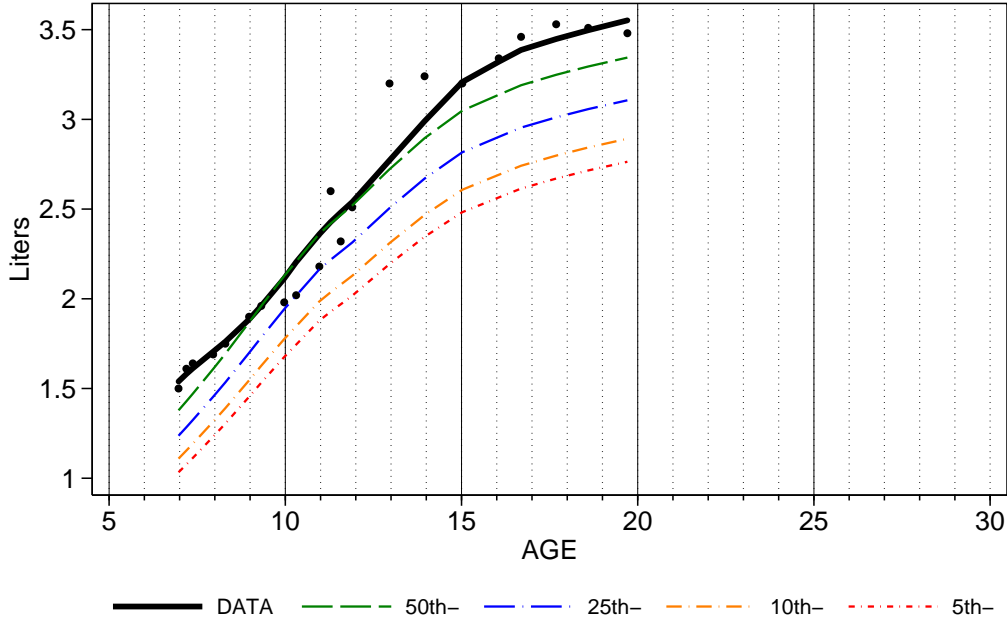

1630

**PATTERN OF GROWTH/DECLINE (Check One)**

- ( 1 ) Normal Growth
- ( 2 ) Normal Growth, Early Decline
- ( 3 ) Reduced Growth
- ( 4 ) Reduced Growth, Early Decline
- ( 9 ) Undetermined Pattern
- ( 8 ) Undetermined - not enough data

Maximum lung growth attained: ( 1 ) Yes ( 0 ) No

Plateau started: ( 2 ) No plateau ( 1 ) Yes ( 0 ) No

Decline started: ( 1 ) Yes ( 0 ) No

AGE AT each of the following periods (use '99' if N/A):

Maximum Lung Growth: \_\_\_\_ . \_\_\_\_

Start of Plateau: \_\_\_\_ . \_\_\_\_

Start of Decline: \_\_\_\_ . \_\_\_\_

### Pre-BD FEV1 Data and Percentiles: 1637

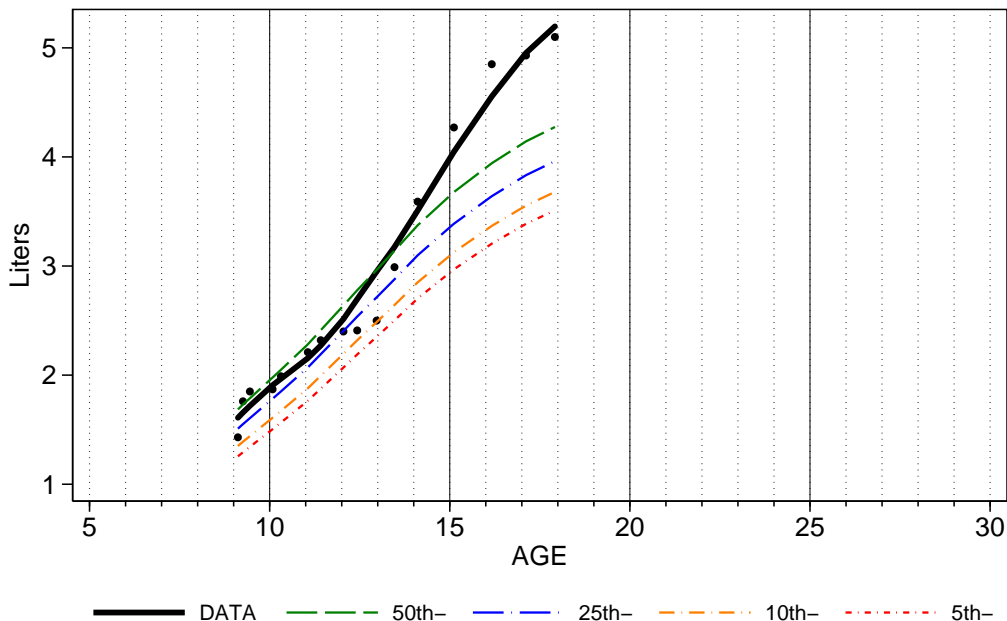

1637

**PATTERN OF GROWTH/DECLINE (Check One)**

- ( 1 ) Normal Growth
- ( 2 ) Normal Growth, Early Decline
- ( 3 ) Reduced Growth
- ( 4 ) Reduced Growth, Early Decline
- ( 9 ) Undetermined Pattern
- ( 8 ) Undetermined - not enough data

Maximum lung growth attained: ( 1 ) Yes ( 0 ) No

Plateau started: ( 2 ) No plateau ( 1 ) Yes ( 0 ) No

Decline started: ( 1 ) Yes ( 0 ) No

AGE AT each of the following periods (use '99' if N/A):

Maximum Lung Growth: \_\_\_\_ . \_\_\_\_

Start of Plateau: \_\_\_\_ . \_\_\_\_

Start of Decline: \_\_\_\_ . \_\_\_\_

### Pre-BD FEV1 Data and Percentiles: 1640

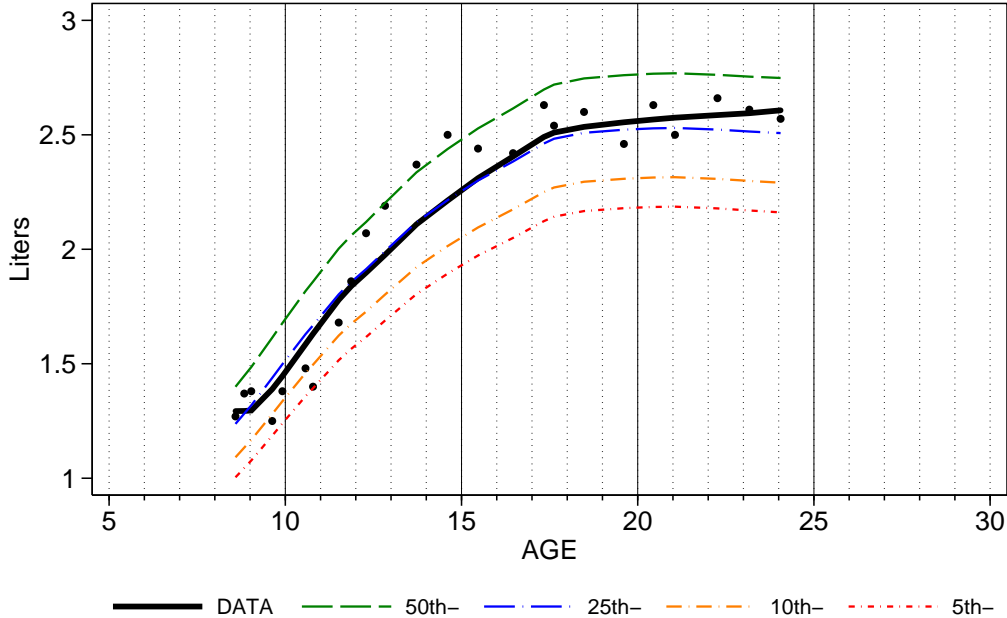

1640

**PATTERN OF GROWTH/DECLINE (Check One)**

- ( 1 ) Normal Growth
- ( 2 ) Normal Growth, Early Decline
- ( 3 ) Reduced Growth
- ( 4 ) Reduced Growth, Early Decline
- ( 9 ) Undetermined Pattern
- ( 8 ) Undetermined - not enough data

Maximum lung growth attained: ( 1 ) Yes ( 0 ) No

Plateau started: ( 2 ) No plateau ( 1 ) Yes ( 0 ) No

Decline started: ( 1 ) Yes ( 0 ) No

AGE AT each of the following periods (use '99' if N/A):

Maximum Lung Growth: \_\_\_\_ . \_\_\_\_

Start of Plateau: \_\_\_\_ . \_\_\_\_

Start of Decline: \_\_\_\_ . \_\_\_\_

### Pre-BD FEV1 Data and Percentiles: 1641

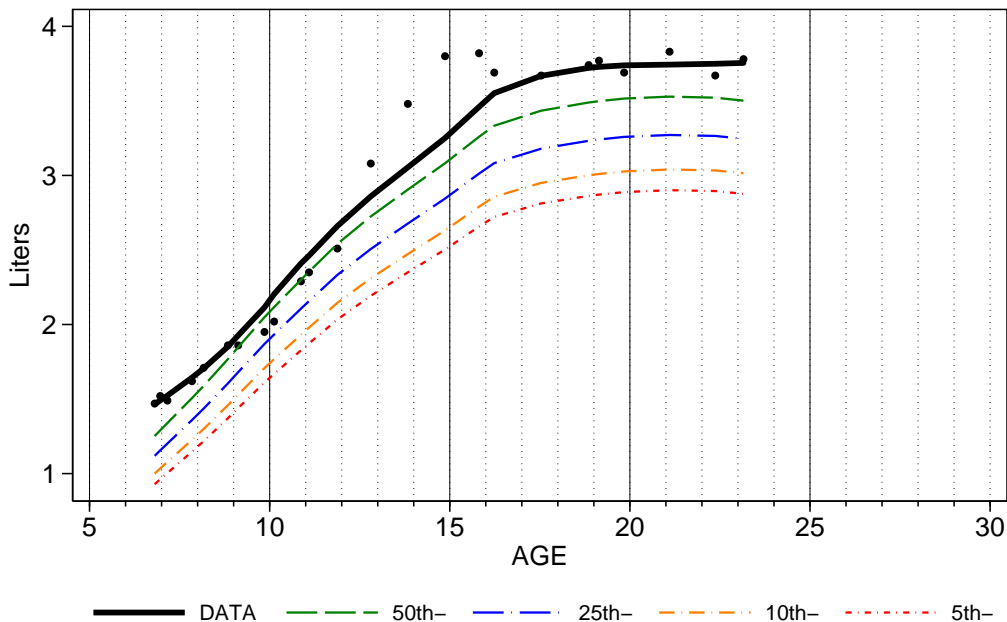

1641

**PATTERN OF GROWTH/DECLINE (Check One)**

- ( 1 ) Normal Growth
- ( 2 ) Normal Growth, Early Decline
- ( 3 ) Reduced Growth
- ( 4 ) Reduced Growth, Early Decline
- ( 9 ) Undetermined Pattern
- ( 8 ) Undetermined - not enough data

Maximum lung growth attained: ( 1 ) Yes ( 0 ) No

Plateau started: ( 2 ) No plateau ( 1 ) Yes ( 0 ) No

Decline started: ( 1 ) Yes ( 0 ) No

AGE AT each of the following periods (use '99' if N/A):

Maximum Lung Growth: \_\_\_\_ . \_\_\_\_

Start of Plateau: \_\_\_\_ . \_\_\_\_

Start of Decline: \_\_\_\_ . \_\_\_\_



### Pre-BD FEV1 Data and Percentiles: 1646

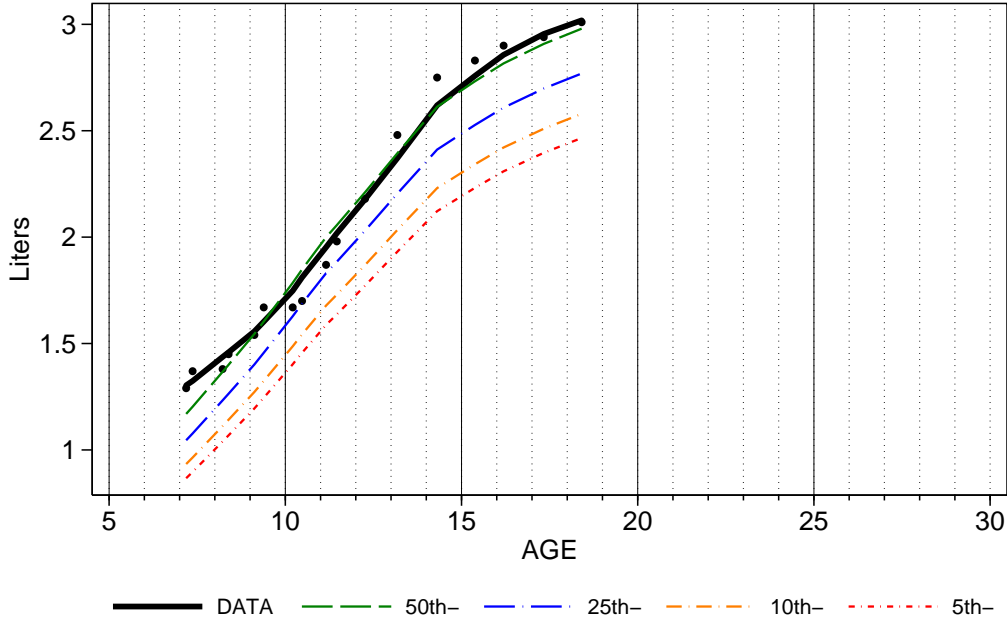

1646

**PATTERN OF GROWTH/DECLINE (Check One)**

- ( 1 ) Normal Growth
- ( 2 ) Normal Growth, Early Decline
- ( 3 ) Reduced Growth
- ( 4 ) Reduced Growth, Early Decline
- ( 9 ) Undetermined Pattern
- ( 8 ) Undetermined - not enough data

Maximum lung growth attained: ( 1 ) Yes ( 0 ) No

Plateau started: ( 2 ) No plateau ( 1 ) Yes ( 0 ) No

Decline started: ( 1 ) Yes ( 0 ) No

AGE AT each of the following periods (use '99' if N/A):

Maximum Lung Growth: \_\_\_\_ . \_\_\_\_

Start of Plateau: \_\_\_\_ . \_\_\_\_

Start of Decline: \_\_\_\_ . \_\_\_\_

### Pre-BD FEV1 Data and Percentiles: 1648

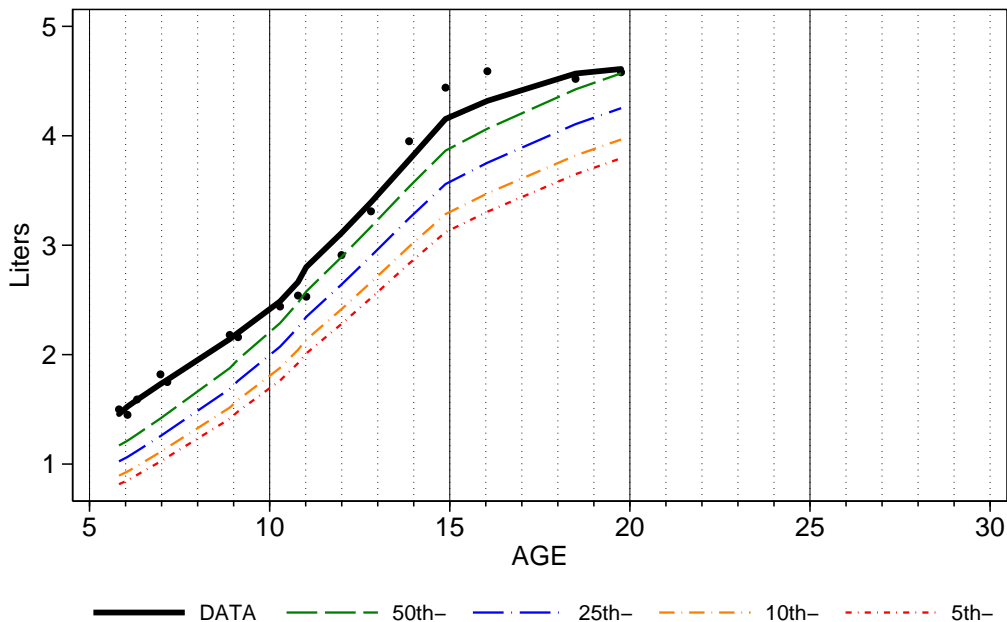

1648

**PATTERN OF GROWTH/DECLINE (Check One)**

- ( 1 ) Normal Growth
- ( 2 ) Normal Growth, Early Decline
- ( 3 ) Reduced Growth
- ( 4 ) Reduced Growth, Early Decline
- ( 9 ) Undetermined Pattern
- ( 8 ) Undetermined - not enough data

Maximum lung growth attained: ( 1 ) Yes ( 0 ) No

Plateau started: ( 2 ) No plateau ( 1 ) Yes ( 0 ) No

Decline started: ( 1 ) Yes ( 0 ) No

AGE AT each of the following periods (use '99' if N/A):

Maximum Lung Growth: \_\_\_\_ . \_\_\_\_

Start of Plateau: \_\_\_\_ . \_\_\_\_

Start of Decline: \_\_\_\_ . \_\_\_\_

### Pre-BD FEV1 Data and Percentiles: 1654

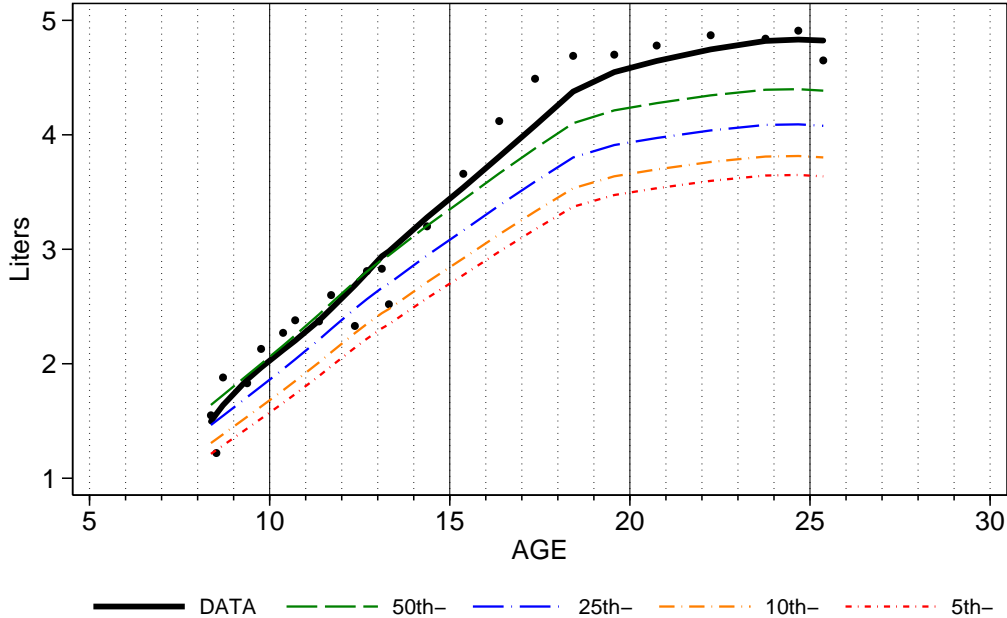

1654

**PATTERN OF GROWTH/DECLINE (Check One)**

- ( 1 ) Normal Growth
- ( 2 ) Normal Growth, Early Decline
- ( 3 ) Reduced Growth
- ( 4 ) Reduced Growth, Early Decline
- ( 9 ) Undetermined Pattern
- ( 8 ) Undetermined - not enough data

Maximum lung growth attained: ( 1 ) Yes ( 0 ) No

Plateau started: ( 2 ) No plateau ( 1 ) Yes ( 0 ) No

Decline started: ( 1 ) Yes ( 0 ) No

AGE AT each of the following periods (use '99' if N/A):

Maximum Lung Growth: \_\_\_\_ . \_\_\_\_

Start of Plateau: \_\_\_\_ . \_\_\_\_

Start of Decline: \_\_\_\_ . \_\_\_\_

### Pre-BD FEV1 Data and Percentiles: 1656

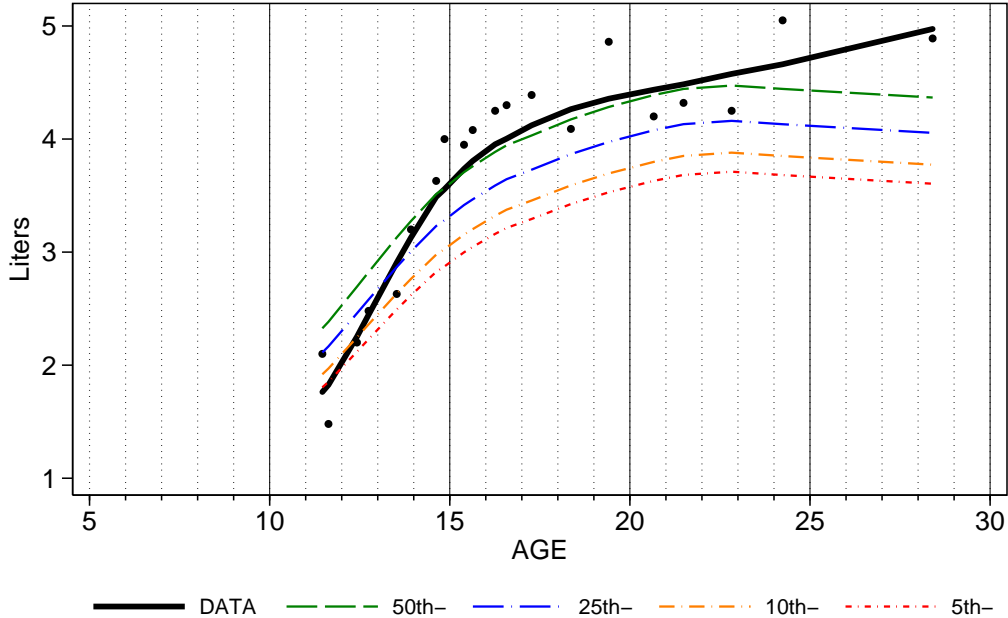

1656

**PATTERN OF GROWTH/DECLINE (Check One)**

- ( 1 ) Normal Growth
- ( 2 ) Normal Growth, Early Decline
- ( 3 ) Reduced Growth
- ( 4 ) Reduced Growth, Early Decline
- ( 9 ) Undetermined Pattern
- ( 8 ) Undetermined - not enough data

Maximum lung growth attained: ( 1 ) Yes ( 0 ) No

Plateau started: ( 2 ) No plateau ( 1 ) Yes ( 0 ) No

Decline started: ( 1 ) Yes ( 0 ) No

AGE AT each of the following periods (use '99' if N/A):

Maximum Lung Growth: \_\_\_\_ . \_\_\_\_

Start of Plateau: \_\_\_\_ . \_\_\_\_

Start of Decline: \_\_\_\_ . \_\_\_\_

### Pre-BD FEV1 Data and Percentiles: 1665

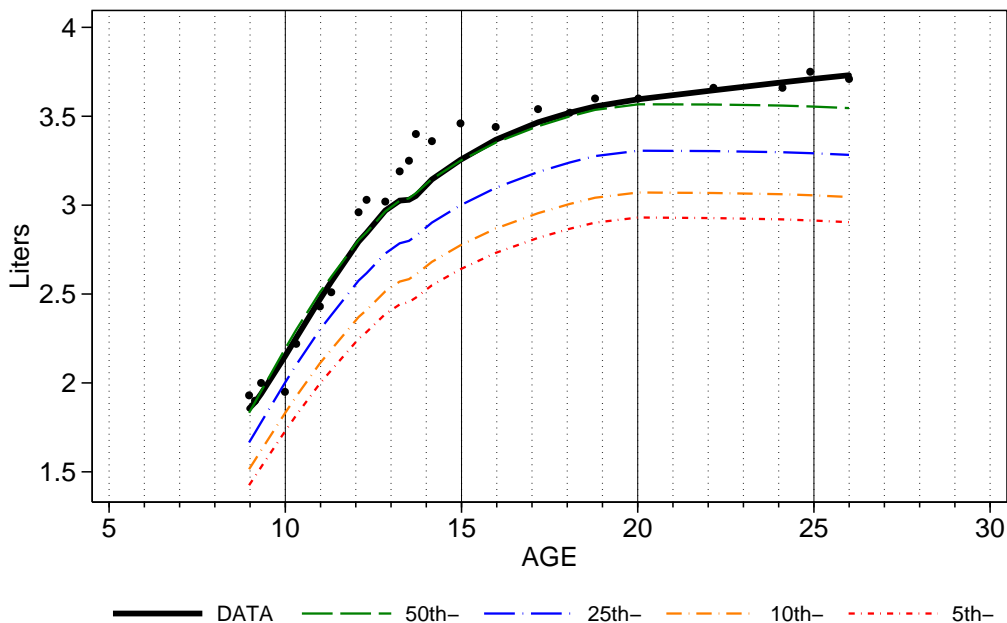

1665

**PATTERN OF GROWTH/DECLINE (Check One)**

- ( 1) Normal Growth
- ( 2) Normal Growth, Early Decline
- ( 3) Reduced Growth
- ( 4) Reduced Growth, Early Decline
- ( 9) Undetermined Pattern
- ( 8) Undetermined - not enough data

Maximum lung growth attained: ( 1) Yes ( 0) No

Plateau started: ( 2) No plateau ( 1) Yes ( 0) No

Decline started: ( 1) Yes ( 0) No

AGE AT each of the following periods (use '99' if N/A):

Maximum Lung Growth: \_\_\_\_ . \_\_\_\_

Start of Plateau: \_\_\_\_ . \_\_\_\_

Start of Decline: \_\_\_\_ . \_\_\_\_

### Pre-BD FEV1 Data and Percentiles: 1672

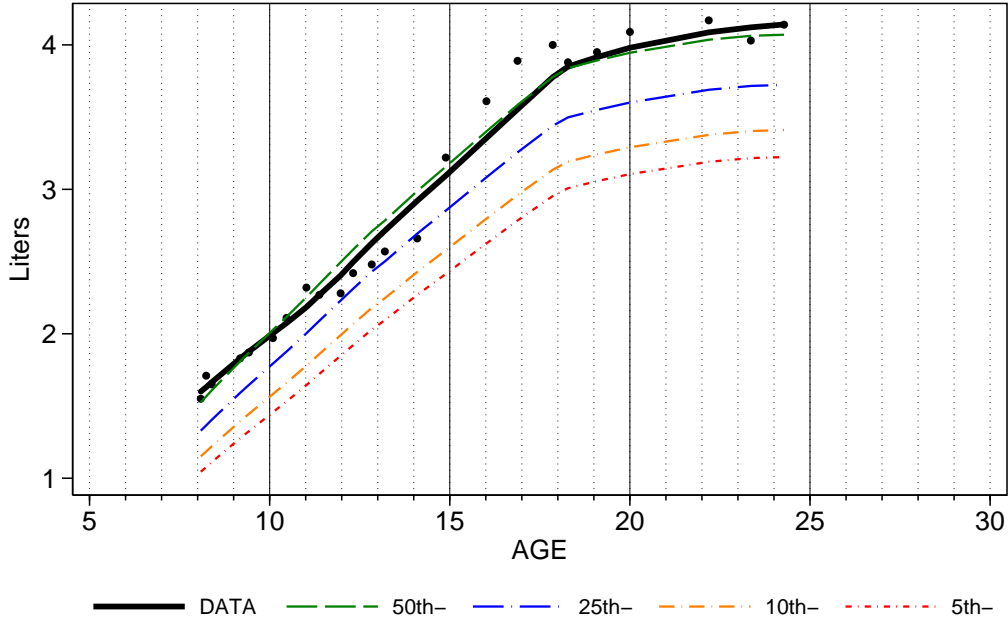

1672

**PATTERN OF GROWTH/DECLINE (Check One)**

- ( 1 ) Normal Growth
- ( 2 ) Normal Growth, Early Decline
- ( 3 ) Reduced Growth
- ( 4 ) Reduced Growth, Early Decline
- ( 9 ) Undetermined Pattern
- ( 8 ) Undetermined - not enough data

Maximum lung growth attained: ( 1 ) Yes ( 0 ) No

Plateau started: ( 2 ) No plateau ( 1 ) Yes ( 0 ) No

Decline started: ( 1 ) Yes ( 0 ) No

AGE AT each of the following periods (use '99' if N/A):

Maximum Lung Growth: \_\_\_\_ . \_\_\_\_

Start of Plateau: \_\_\_\_ . \_\_\_\_

Start of Decline: \_\_\_\_ . \_\_\_\_

### Pre-BD FEV1 Data and Percentiles: 1673

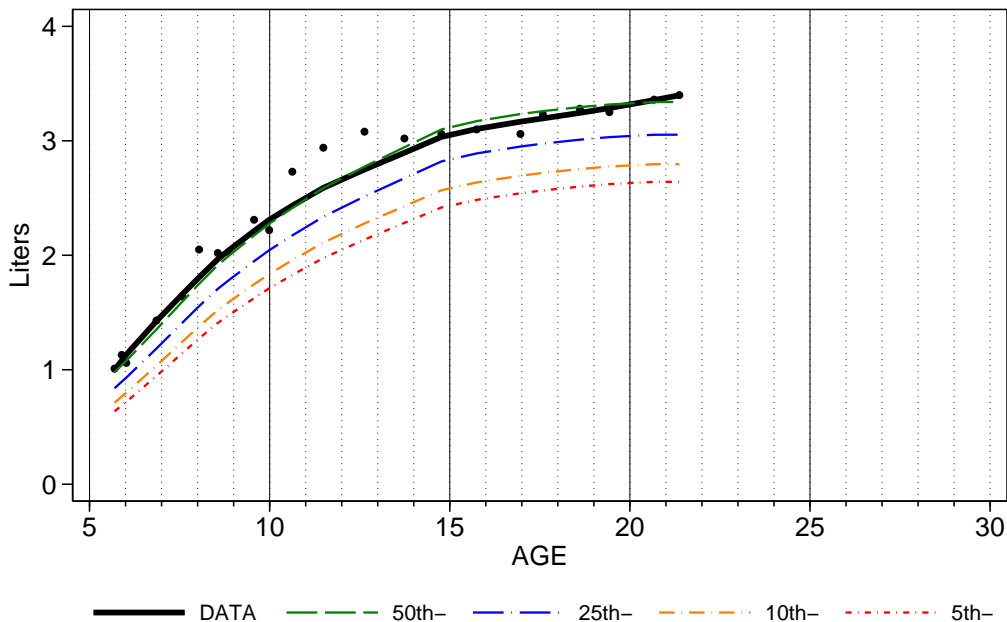

1673

**PATTERN OF GROWTH/DECLINE (Check One)**

- ( 1) Normal Growth
- ( 2) Normal Growth, Early Decline
- ( 3) Reduced Growth
- ( 4) Reduced Growth, Early Decline
- ( 9) Undetermined Pattern
- ( 8) Undetermined - not enough data

Maximum lung growth attained: ( 1) Yes ( 0) No

Plateau started: ( 2) No plateau ( 1) Yes ( 0) No

Decline started: ( 1) Yes ( 0) No

AGE AT each of the following periods (use '99' if N/A):

Maximum Lung Growth: \_\_\_\_ . \_\_\_\_

Start of Plateau: \_\_\_\_ . \_\_\_\_

Start of Decline: \_\_\_\_ . \_\_\_\_

### Pre-BD FEV1 Data and Percentiles: 1682

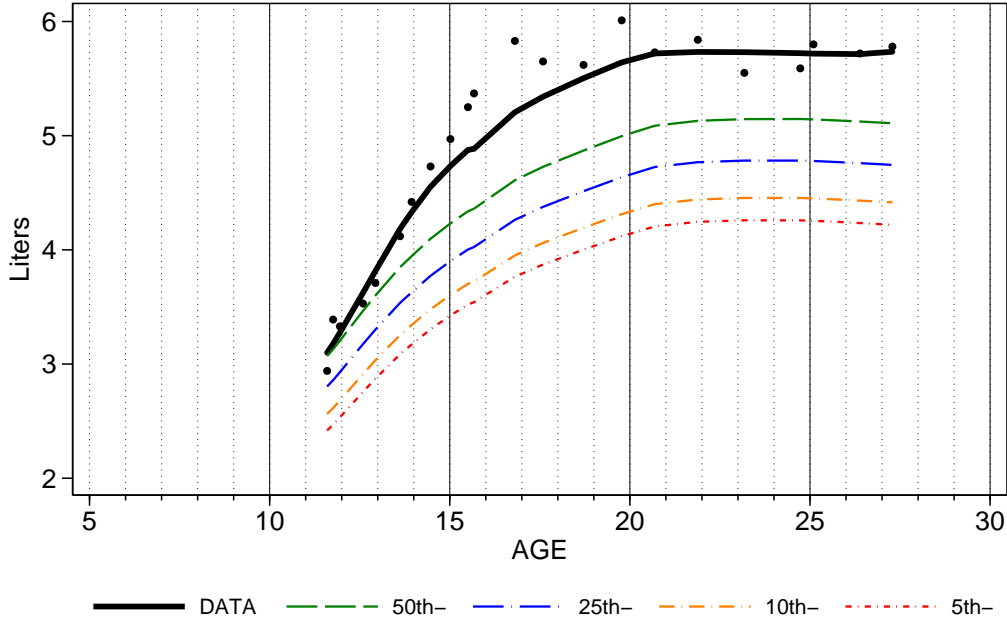

1682

**PATTERN OF GROWTH/DECLINE (Check One)**

- ( 1) Normal Growth
- ( 2) Normal Growth, Early Decline
- ( 3) Reduced Growth
- ( 4) Reduced Growth, Early Decline
- ( 9) Undetermined Pattern
- ( 8) Undetermined - not enough data

Maximum lung growth attained: ( 1) Yes ( 0) No

Plateau started: ( 2) No plateau ( 1) Yes ( 0) No

Decline started: ( 1) Yes ( 0) No

AGE AT each of the following periods (use '99' if N/A):

Maximum Lung Growth: \_\_\_\_ . \_\_\_\_

Start of Plateau: \_\_\_\_ . \_\_\_\_

Start of Decline: \_\_\_\_ . \_\_\_\_



### Pre-BD FEV1 Data and Percentiles: 1685

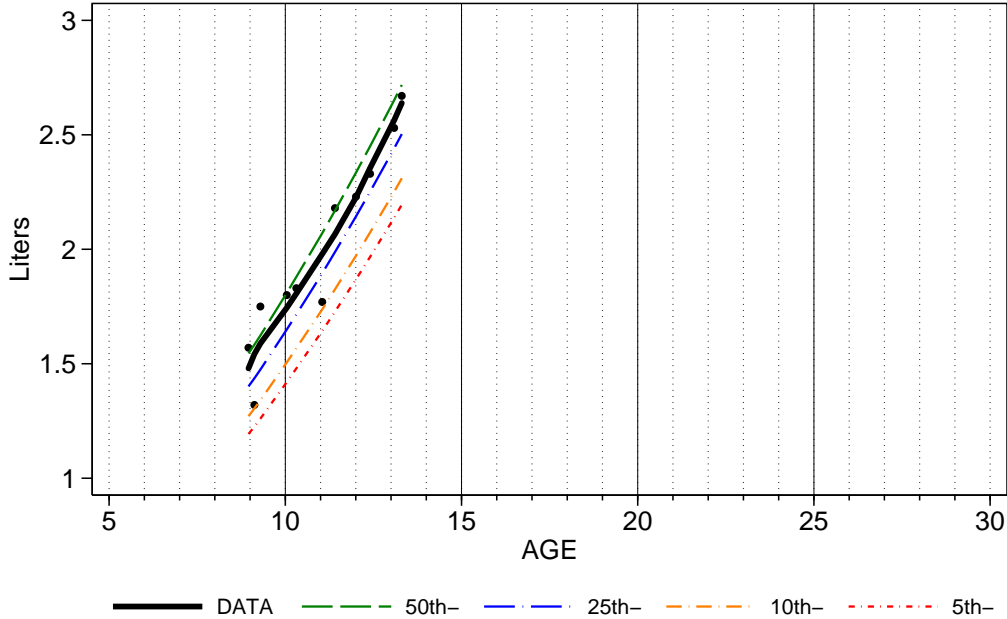

1685

**PATTERN OF GROWTH/DECLINE (Check One)**

- ( 1 ) Normal Growth
- ( 2 ) Normal Growth, Early Decline
- ( 3 ) Reduced Growth
- ( 4 ) Reduced Growth, Early Decline
- ( 9 ) Undetermined Pattern
- ( 8 ) Undetermined - not enough data

Maximum lung growth attained: ( 1 ) Yes ( 0 ) No

Plateau started: ( 2 ) No plateau ( 1 ) Yes ( 0 ) No

Decline started: ( 1 ) Yes ( 0 ) No

AGE AT each of the following periods (use '99' if N/A):

Maximum Lung Growth: \_\_\_\_ . \_\_\_\_

Start of Plateau: \_\_\_\_ . \_\_\_\_

Start of Decline: \_\_\_\_ . \_\_\_\_

### Pre-BD FEV1 Data and Percentiles: 1691

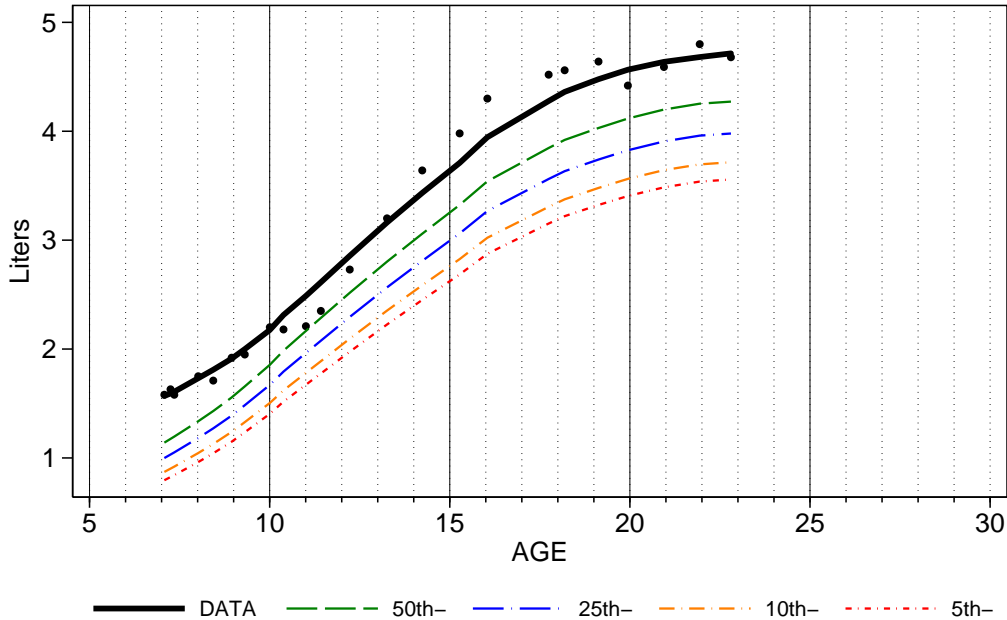

1691

**PATTERN OF GROWTH/DECLINE (Check One)**

- ( 1 ) Normal Growth
- ( 2 ) Normal Growth, Early Decline
- ( 3 ) Reduced Growth
- ( 4 ) Reduced Growth, Early Decline
- ( 9 ) Undetermined Pattern
- ( 8 ) Undetermined - not enough data

Maximum lung growth attained: ( 1 ) Yes ( 0 ) No

Plateau started: ( 2 ) No plateau ( 1 ) Yes ( 0 ) No

Decline started: ( 1 ) Yes ( 0 ) No

AGE AT each of the following periods (use '99' if N/A):

Maximum Lung Growth: \_\_\_\_ . \_\_\_\_

Start of Plateau: \_\_\_\_ . \_\_\_\_

Start of Decline: \_\_\_\_ . \_\_\_\_

### Pre-BD FEV1 Data and Percentiles: 1692

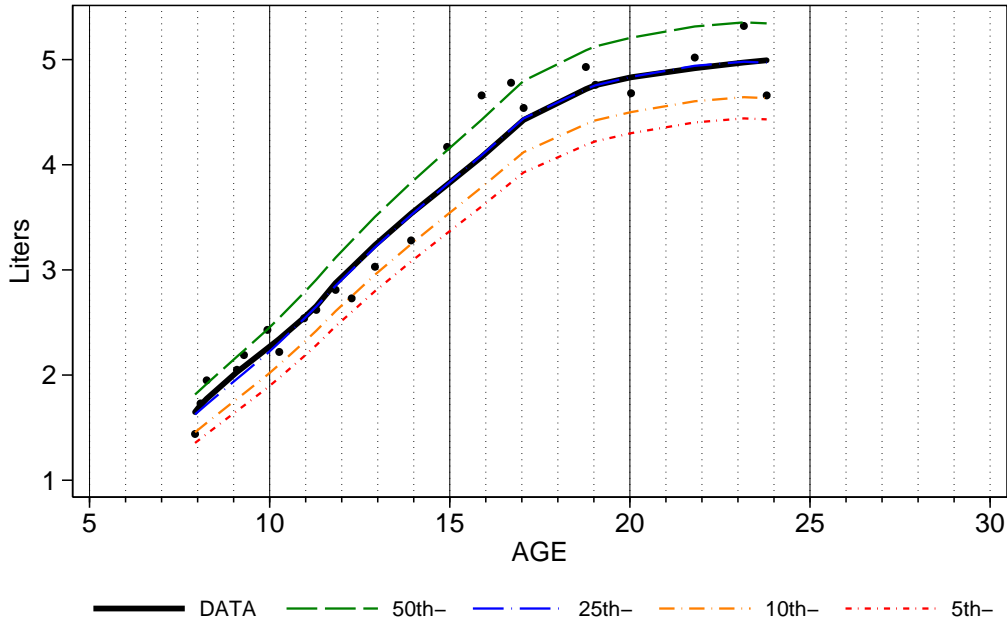

1692

**PATTERN OF GROWTH/DECLINE (Check One)**

- ( 1 ) Normal Growth
- ( 2 ) Normal Growth, Early Decline
- ( 3 ) Reduced Growth
- ( 4 ) Reduced Growth, Early Decline
- ( 9 ) Undetermined Pattern
- ( 8 ) Undetermined - not enough data

Maximum lung growth attained: ( 1 ) Yes ( 0 ) No

Plateau started: ( 2 ) No plateau ( 1 ) Yes ( 0 ) No

Decline started: ( 1 ) Yes ( 0 ) No

AGE AT each of the following periods (use '99' if N/A):

Maximum Lung Growth: \_\_\_\_ . \_\_\_\_

Start of Plateau: \_\_\_\_ . \_\_\_\_

Start of Decline: \_\_\_\_ . \_\_\_\_

### Pre-BD FEV1 Data and Percentiles: 1696

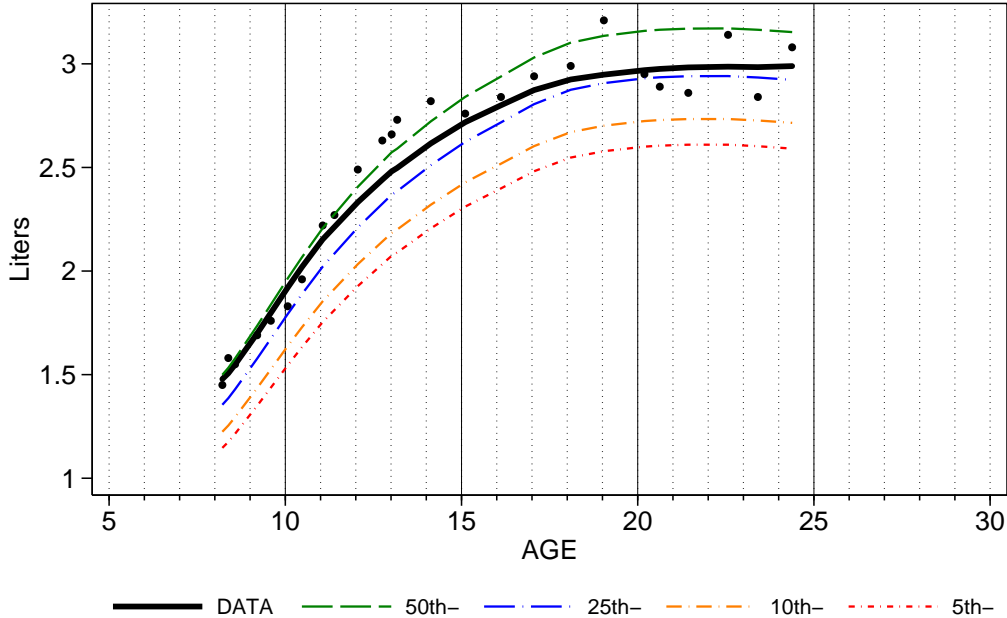

1696

**PATTERN OF GROWTH/DECLINE (Check One)**

- ( 1) Normal Growth
- ( 2) Normal Growth, Early Decline
- ( 3) Reduced Growth
- ( 4) Reduced Growth, Early Decline
- ( 9) Undetermined Pattern
- ( 8) Undetermined - not enough data

Maximum lung growth attained: ( 1) Yes ( 0) No

Plateau started: ( 2) No plateau ( 1) Yes ( 0) No

Decline started: ( 1) Yes ( 0) No

AGE AT each of the following periods (use '99' if N/A):

Maximum Lung Growth: \_\_\_\_ . \_\_\_\_

Start of Plateau: \_\_\_\_ . \_\_\_\_

Start of Decline: \_\_\_\_ . \_\_\_\_

### Pre-BD FEV1 Data and Percentiles: 1697

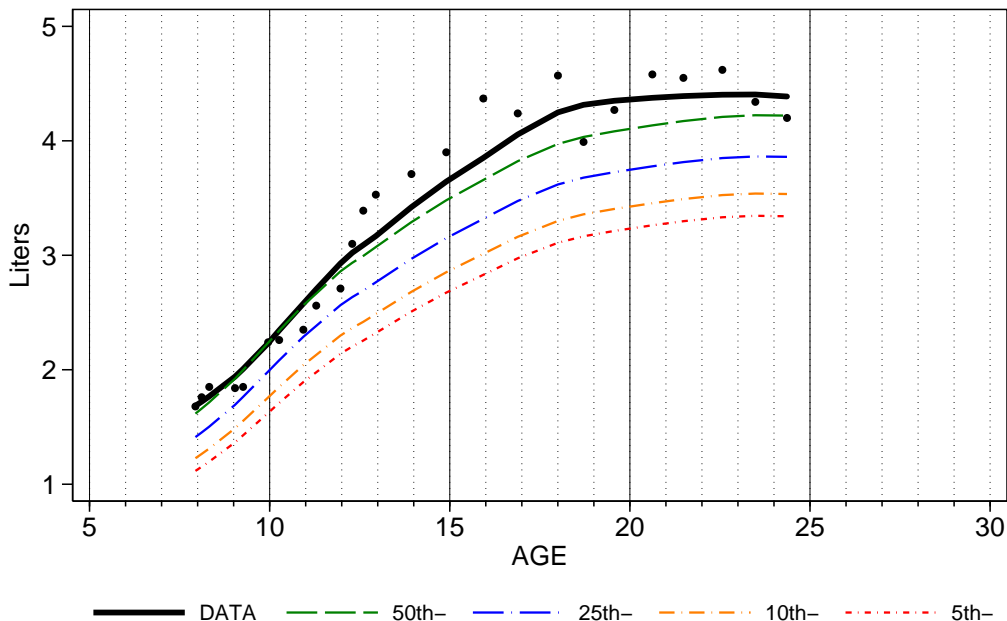

1697

**PATTERN OF GROWTH/DECLINE (Check One)**

- ( 1 ) Normal Growth
- ( 2 ) Normal Growth, Early Decline
- ( 3 ) Reduced Growth
- ( 4 ) Reduced Growth, Early Decline
- ( 9 ) Undetermined Pattern
- ( 8 ) Undetermined - not enough data

Maximum lung growth attained: ( 1 ) Yes ( 0 ) No

Plateau started: ( 2 ) No plateau ( 1 ) Yes ( 0 ) No

Decline started: ( 1 ) Yes ( 0 ) No

AGE AT each of the following periods (use '99' if N/A):

Maximum Lung Growth: \_\_\_\_ . \_\_\_\_

Start of Plateau: \_\_\_\_ . \_\_\_\_

Start of Decline: \_\_\_\_ . \_\_\_\_

### Pre-BD FEV1 Data and Percentiles: 1700

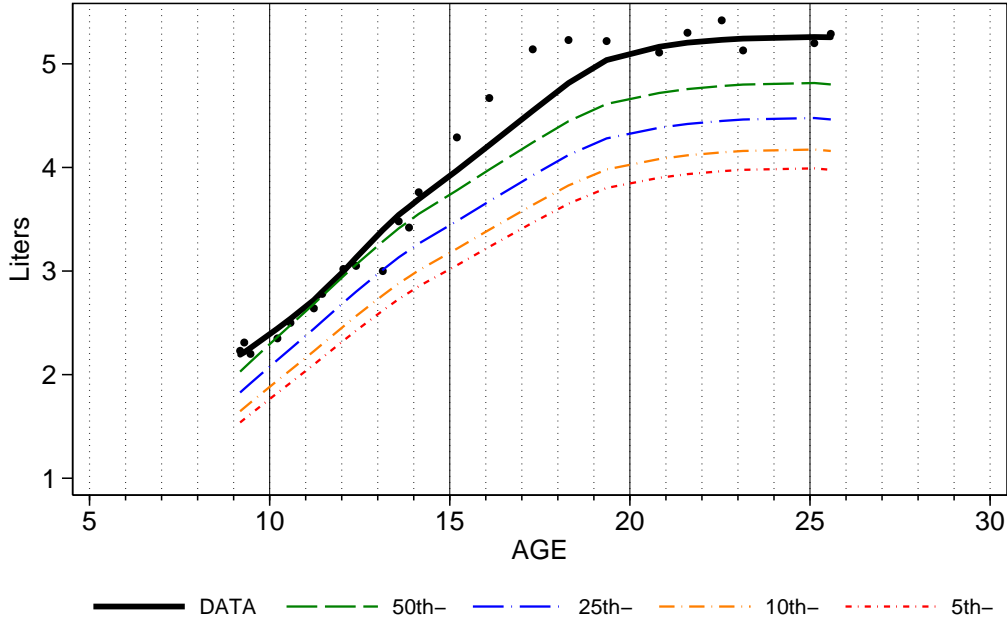

1700

**PATTERN OF GROWTH/DECLINE (Check One)**

- ( 1 ) Normal Growth
- ( 2 ) Normal Growth, Early Decline
- ( 3 ) Reduced Growth
- ( 4 ) Reduced Growth, Early Decline
- ( 9 ) Undetermined Pattern
- ( 8 ) Undetermined - not enough data

Maximum lung growth attained: ( 1 ) Yes ( 0 ) No

Plateau started: ( 2 ) No plateau ( 1 ) Yes ( 0 ) No

Decline started: ( 1 ) Yes ( 0 ) No

AGE AT each of the following periods (use '99' if N/A):

Maximum Lung Growth: \_\_\_\_ . \_\_\_\_

Start of Plateau: \_\_\_\_ . \_\_\_\_

Start of Decline: \_\_\_\_ . \_\_\_\_

### Pre-BD FEV1 Data and Percentiles: 1701

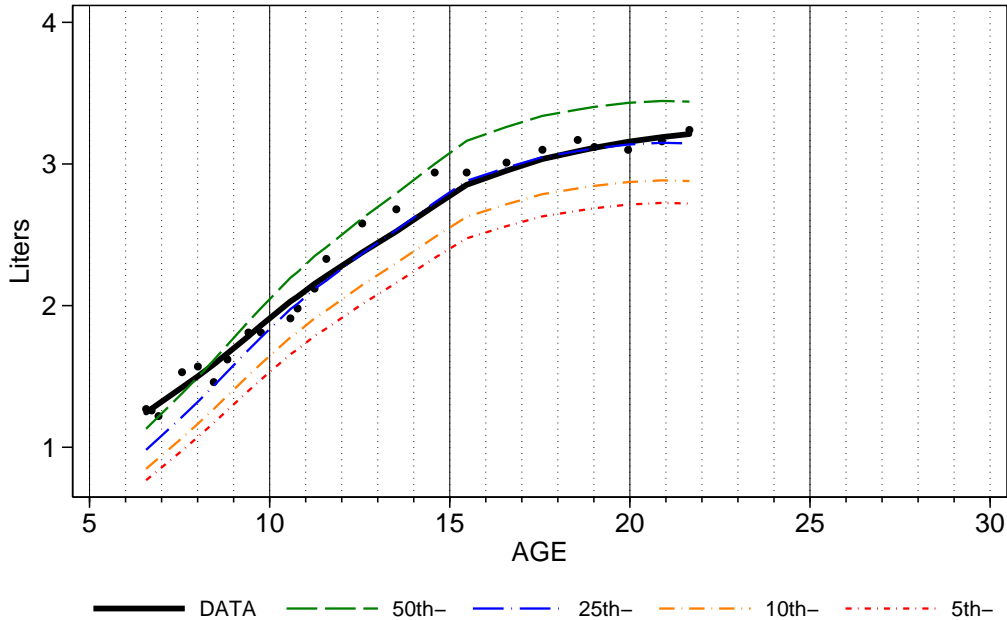

1701

**PATTERN OF GROWTH/DECLINE (Check One)**

- ( 1 ) Normal Growth
- ( 2 ) Normal Growth, Early Decline
- ( 3 ) Reduced Growth
- ( 4 ) Reduced Growth, Early Decline
- ( 9 ) Undetermined Pattern
- ( 8 ) Undetermined - not enough data

Maximum lung growth attained: ( 1 ) Yes ( 0 ) No

Plateau started: ( 2 ) No plateau ( 1 ) Yes ( 0 ) No

Decline started: ( 1 ) Yes ( 0 ) No

AGE AT each of the following periods (use '99' if N/A):

Maximum Lung Growth: \_\_\_\_ . \_\_\_\_

Start of Plateau: \_\_\_\_ . \_\_\_\_

Start of Decline: \_\_\_\_ . \_\_\_\_

### Pre-BD FEV1 Data and Percentiles: 1705

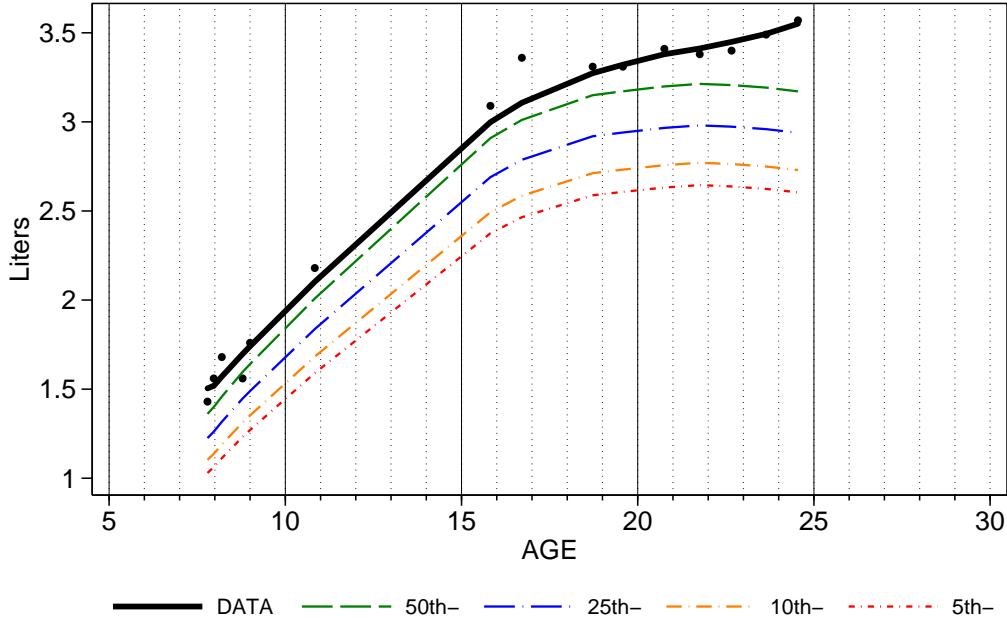

1705

**PATTERN OF GROWTH/DECLINE (Check One)**

- ( 1 ) Normal Growth
- ( 2 ) Normal Growth, Early Decline
- ( 3 ) Reduced Growth
- ( 4 ) Reduced Growth, Early Decline
- ( 9 ) Undetermined Pattern
- ( 8 ) Undetermined - not enough data

Maximum lung growth attained: ( 1 ) Yes ( 0 ) No

Plateau started: ( 2 ) No plateau ( 1 ) Yes ( 0 ) No

Decline started: ( 1 ) Yes ( 0 ) No

AGE AT each of the following periods (use '99' if N/A):

Maximum Lung Growth: \_\_\_\_ . \_\_\_\_

Start of Plateau: \_\_\_\_ . \_\_\_\_

Start of Decline: \_\_\_\_ . \_\_\_\_



### Pre-BD FEV1 Data and Percentiles: 1709

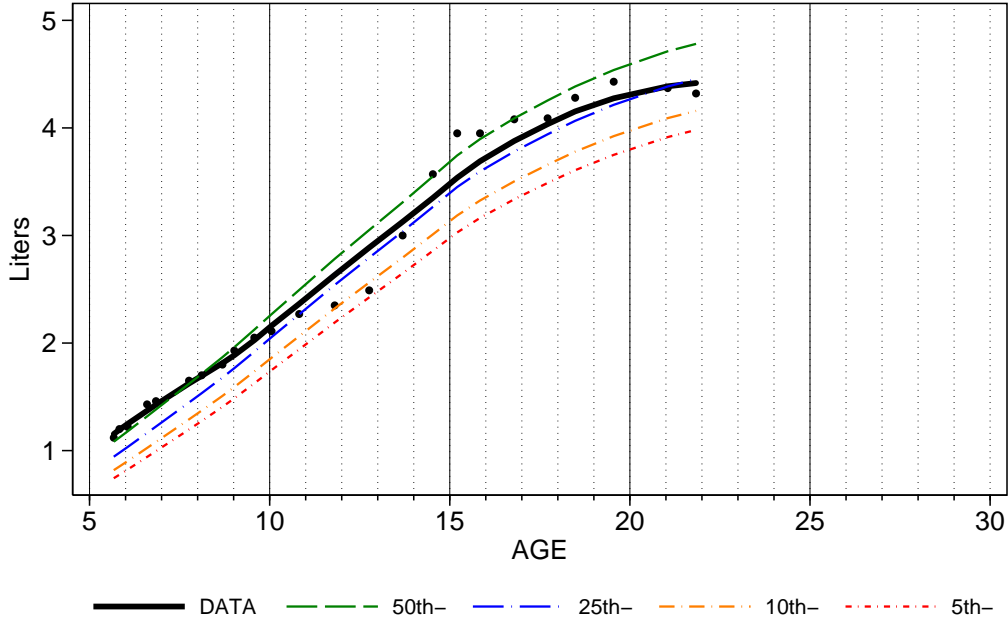

1709

**PATTERN OF GROWTH/DECLINE (Check One)**

- ( 1 ) Normal Growth
- ( 2 ) Normal Growth, Early Decline
- ( 3 ) Reduced Growth
- ( 4 ) Reduced Growth, Early Decline
- ( 9 ) Undetermined Pattern
- ( 8 ) Undetermined - not enough data

Maximum lung growth attained: ( 1 ) Yes ( 0 ) No

Plateau started: ( 2 ) No plateau ( 1 ) Yes ( 0 ) No

Decline started: ( 1 ) Yes ( 0 ) No

AGE AT each of the following periods (use '99' if N/A):

Maximum Lung Growth: \_\_\_\_ . \_\_\_\_

Start of Plateau: \_\_\_\_ . \_\_\_\_

Start of Decline: \_\_\_\_ . \_\_\_\_

### Pre-BD FEV1 Data and Percentiles: 1712

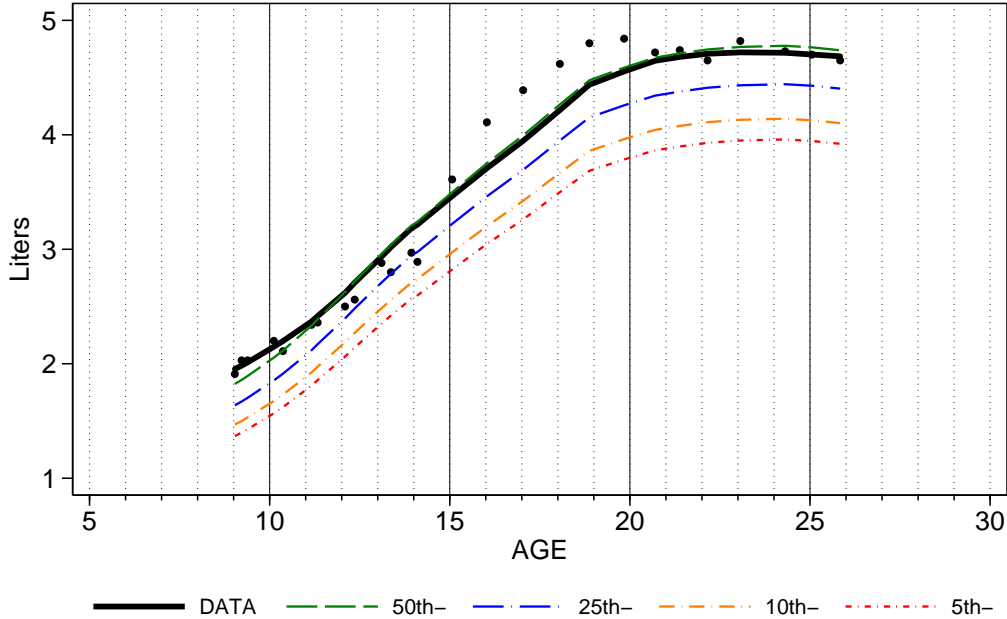

1712

**PATTERN OF GROWTH/DECLINE (Check One)**

- ( 1 ) Normal Growth
- ( 2 ) Normal Growth, Early Decline
- ( 3 ) Reduced Growth
- ( 4 ) Reduced Growth, Early Decline
- ( 9 ) Undetermined Pattern
- ( 8 ) Undetermined - not enough data

Maximum lung growth attained: ( 1 ) Yes ( 0 ) No

Plateau started: ( 2 ) No plateau ( 1 ) Yes ( 0 ) No

Decline started: ( 1 ) Yes ( 0 ) No

AGE AT each of the following periods (use '99' if N/A):

Maximum Lung Growth: \_\_\_\_ . \_\_\_\_

Start of Plateau: \_\_\_\_ . \_\_\_\_

Start of Decline: \_\_\_\_ . \_\_\_\_

### Pre-BD FEV1 Data and Percentiles: 1722

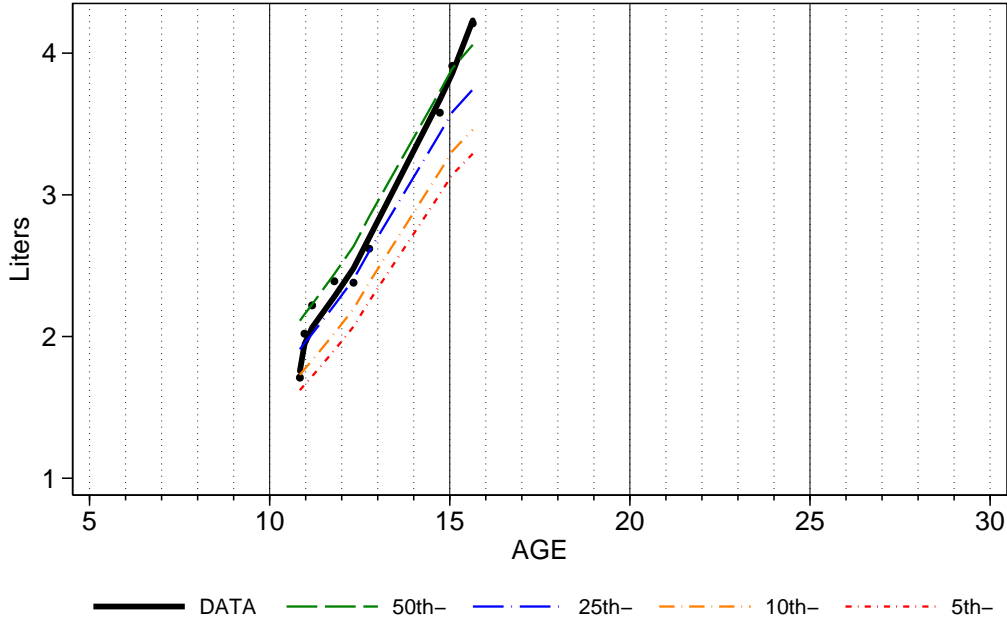

1722

**PATTERN OF GROWTH/DECLINE (Check One)**

- ( 1) Normal Growth
- ( 2) Normal Growth, Early Decline
- ( 3) Reduced Growth
- ( 4) Reduced Growth, Early Decline
- ( 9) Undetermined Pattern
- ( 8) Undetermined - not enough data

Maximum lung growth attained: ( 1) Yes ( 0) No

Plateau started: ( 2) No plateau ( 1) Yes ( 0) No

Decline started: ( 1) Yes ( 0) No

AGE AT each of the following periods (use '99' if N/A):

Maximum Lung Growth: \_\_\_\_ . \_\_\_\_

Start of Plateau: \_\_\_\_ . \_\_\_\_

Start of Decline: \_\_\_\_ . \_\_\_\_

### Pre-BD FEV1 Data and Percentiles: 1726

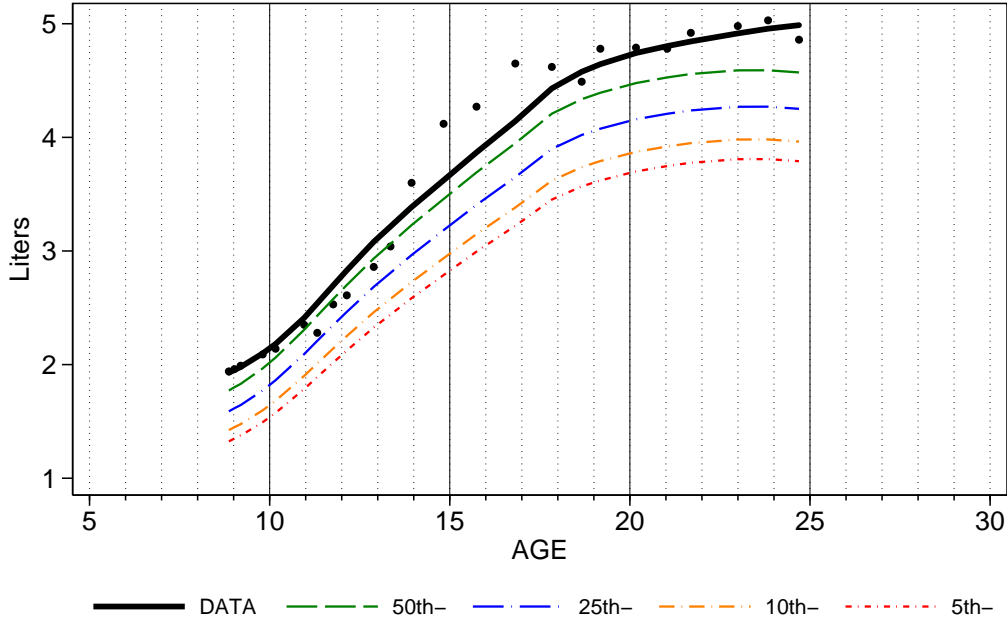

1726

**PATTERN OF GROWTH/DECLINE (Check One)**

- ( 1 ) Normal Growth
- ( 2 ) Normal Growth, Early Decline
- ( 3 ) Reduced Growth
- ( 4 ) Reduced Growth, Early Decline
- ( 9 ) Undetermined Pattern
- ( 8 ) Undetermined - not enough data

Maximum lung growth attained: ( 1 ) Yes ( 0 ) No

Plateau started: ( 2 ) No plateau ( 1 ) Yes ( 0 ) No

Decline started: ( 1 ) Yes ( 0 ) No

AGE AT each of the following periods (use '99' if N/A):

Maximum Lung Growth: \_\_\_\_ . \_\_\_\_

Start of Plateau: \_\_\_\_ . \_\_\_\_

Start of Decline: \_\_\_\_ . \_\_\_\_

### Pre-BD FEV1 Data and Percentiles: 1740

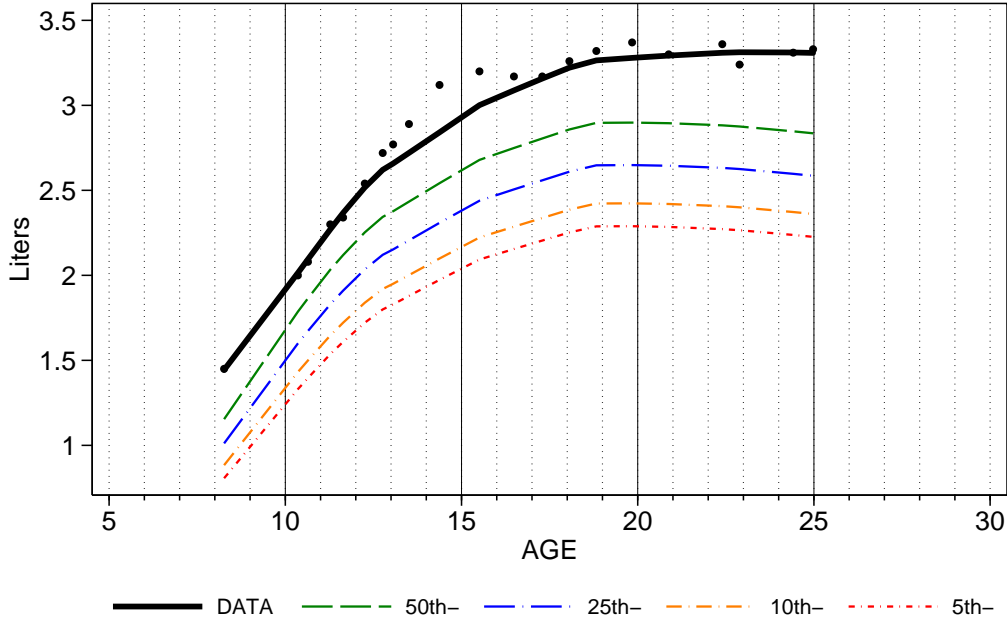

1740

**PATTERN OF GROWTH/DECLINE (Check One)**

- ( 1) Normal Growth
- ( 2) Normal Growth, Early Decline
- ( 3) Reduced Growth
- ( 4) Reduced Growth, Early Decline
- ( 9) Undetermined Pattern
- ( 8) Undetermined - not enough data

Maximum lung growth attained: ( 1) Yes ( 0) No

Plateau started: ( 2) No plateau ( 1) Yes ( 0) No

Decline started: ( 1) Yes ( 0) No

AGE AT each of the following periods (use '99' if N/A):

Maximum Lung Growth: \_\_\_\_ . \_\_\_\_

Start of Plateau: \_\_\_\_ . \_\_\_\_

Start of Decline: \_\_\_\_ . \_\_\_\_

### Pre-BD FEV1 Data and Percentiles: 1742

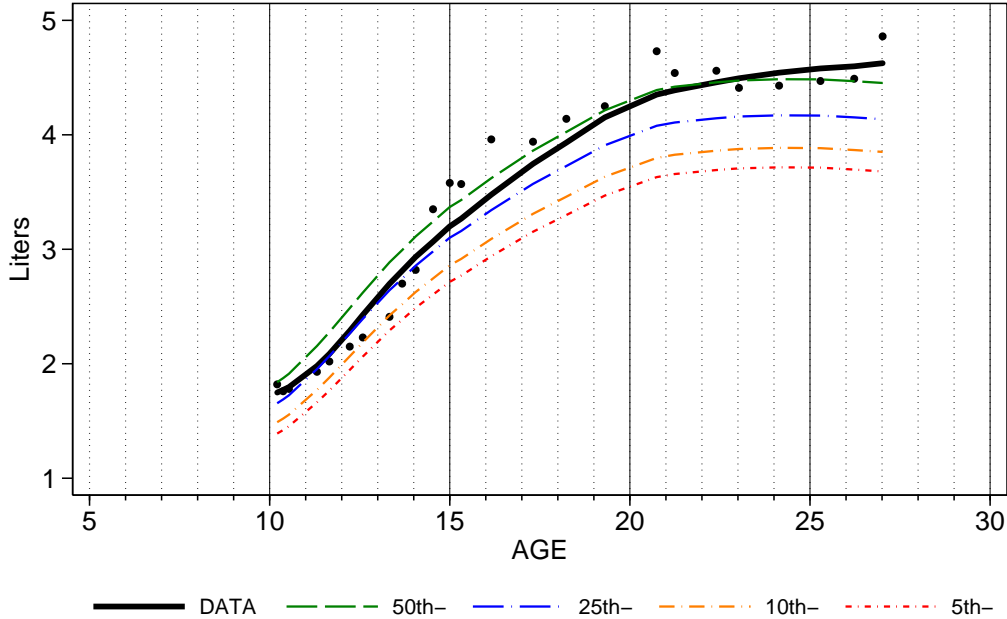

1742

**PATTERN OF GROWTH/DECLINE (Check One)**

- ( 1) Normal Growth
- ( 2) Normal Growth, Early Decline
- ( 3) Reduced Growth
- ( 4) Reduced Growth, Early Decline
- ( 9) Undetermined Pattern
- ( 8) Undetermined - not enough data

Maximum lung growth attained: ( 1) Yes ( 0) No

Plateau started: ( 2) No plateau ( 1) Yes ( 0) No

Decline started: ( 1) Yes ( 0) No

AGE AT each of the following periods (use '99' if N/A):

Maximum Lung Growth: \_\_\_\_ . \_\_\_\_

Start of Plateau: \_\_\_\_ . \_\_\_\_

Start of Decline: \_\_\_\_ . \_\_\_\_

### Pre-BD FEV1 Data and Percentiles: 1743

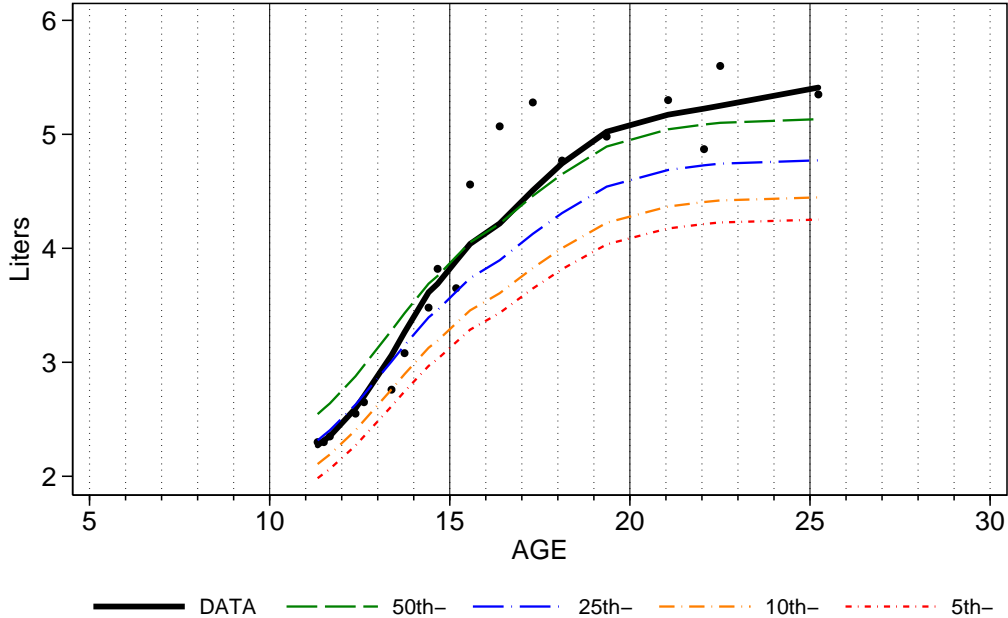

1743

**PATTERN OF GROWTH/DECLINE (Check One)**

- ( 1 ) Normal Growth
- ( 2 ) Normal Growth, Early Decline
- ( 3 ) Reduced Growth
- ( 4 ) Reduced Growth, Early Decline
- ( 9 ) Undetermined Pattern
- ( 8 ) Undetermined - not enough data

Maximum lung growth attained: ( 1 ) Yes ( 0 ) No

Plateau started: ( 2 ) No plateau ( 1 ) Yes ( 0 ) No

Decline started: ( 1 ) Yes ( 0 ) No

AGE AT each of the following periods (use '99' if N/A):

Maximum Lung Growth: \_\_\_\_ . \_\_\_\_

Start of Plateau: \_\_\_\_ . \_\_\_\_

Start of Decline: \_\_\_\_ . \_\_\_\_

### Pre-BD FEV1 Data and Percentiles: 1749

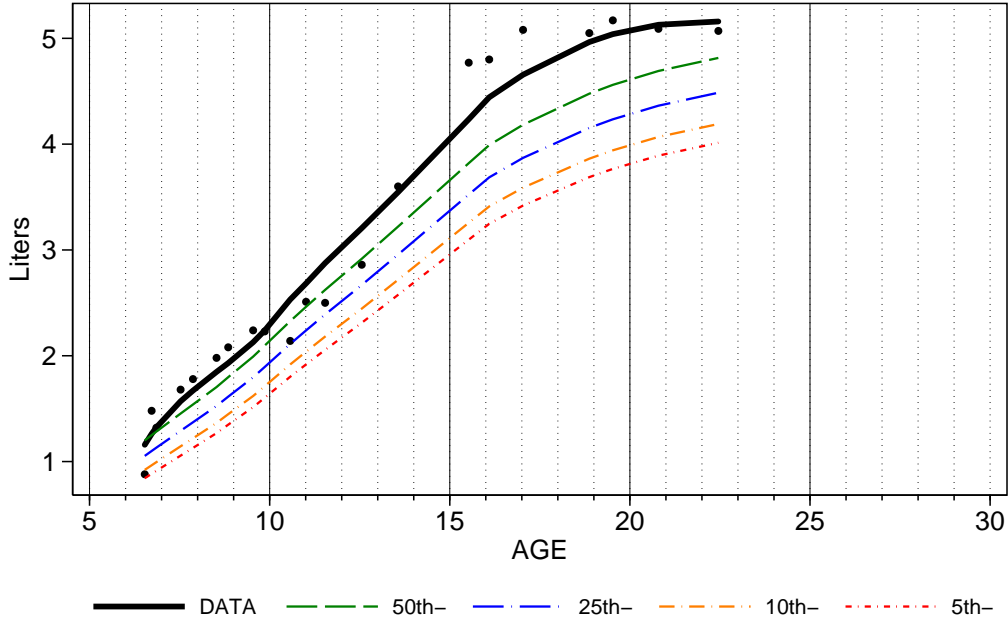

1749

**PATTERN OF GROWTH/DECLINE (Check One)**

- ( 1) Normal Growth
- ( 2) Normal Growth, Early Decline
- ( 3) Reduced Growth
- ( 4) Reduced Growth, Early Decline
- ( 9) Undetermined Pattern
- ( 8) Undetermined - not enough data

Maximum lung growth attained: ( 1) Yes ( 0) No

Plateau started: ( 2) No plateau ( 1) Yes ( 0) No

Decline started: ( 1) Yes ( 0) No

AGE AT each of the following periods (use '99' if N/A):

Maximum Lung Growth: \_\_\_\_ . \_\_\_\_

Start of Plateau: \_\_\_\_ . \_\_\_\_

Start of Decline: \_\_\_\_ . \_\_\_\_



### Pre-BD FEV1 Data and Percentiles: 1756

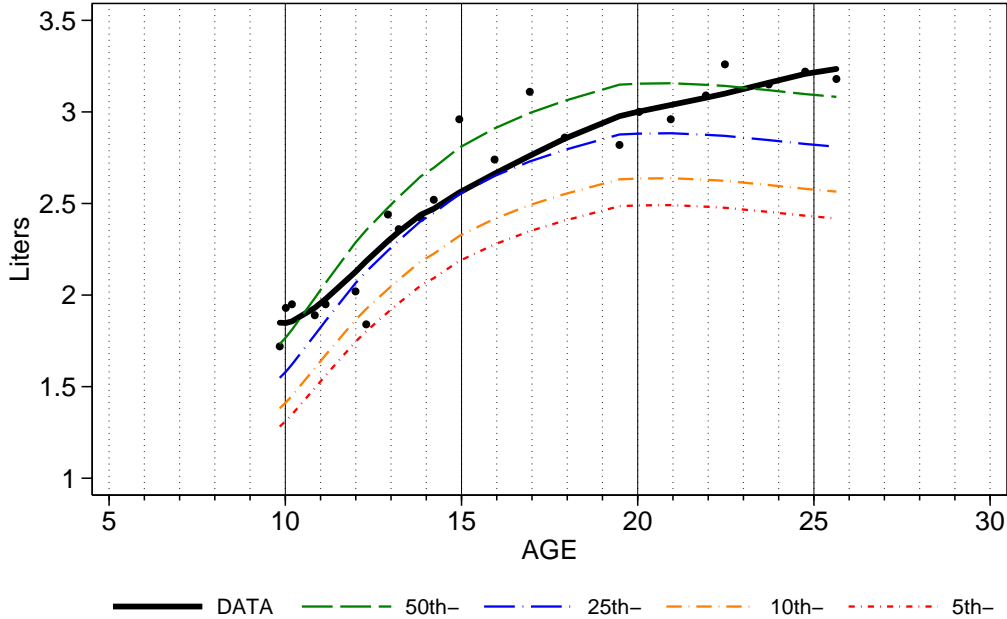

1756

**PATTERN OF GROWTH/DECLINE (Check One)**

- ( 1) Normal Growth
- ( 2) Normal Growth, Early Decline
- ( 3) Reduced Growth
- ( 4) Reduced Growth, Early Decline
- ( 9) Undetermined Pattern
- ( 8) Undetermined - not enough data

Maximum lung growth attained: ( 1) Yes ( 0) No

Plateau started: ( 2) No plateau ( 1) Yes ( 0) No

Decline started: ( 1) Yes ( 0) No

AGE AT each of the following periods (use '99' if N/A):

Maximum Lung Growth: \_\_\_\_ . \_\_\_\_

Start of Plateau: \_\_\_\_ . \_\_\_\_

Start of Decline: \_\_\_\_ . \_\_\_\_

### Pre-BD FEV1 Data and Percentiles: 1757

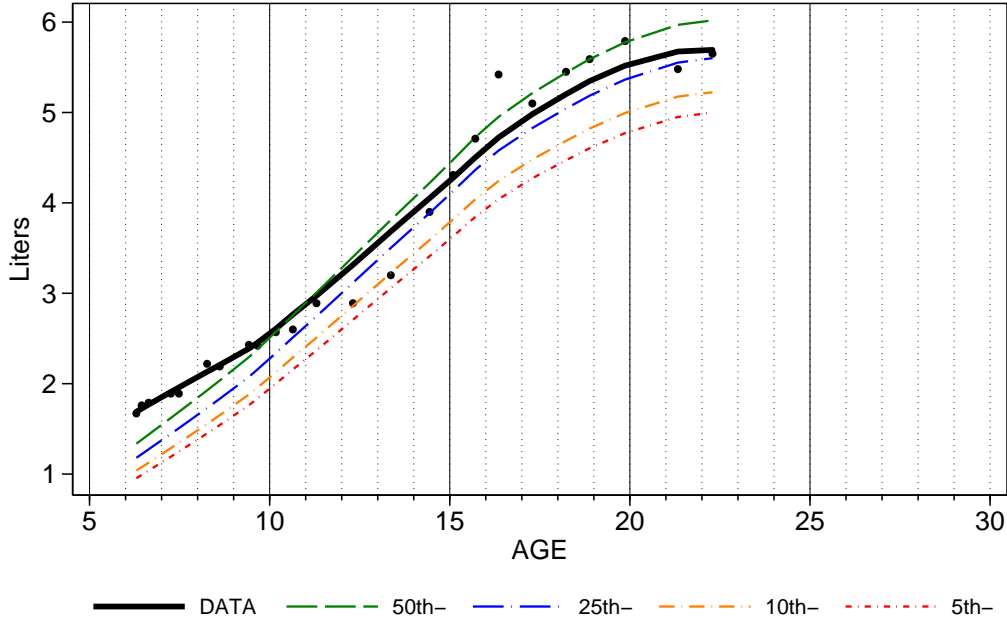

1757

**PATTERN OF GROWTH/DECLINE (Check One)**

- ( 1 ) Normal Growth
- ( 2 ) Normal Growth, Early Decline
- ( 3 ) Reduced Growth
- ( 4 ) Reduced Growth, Early Decline
- ( 9 ) Undetermined Pattern
- ( 8 ) Undetermined - not enough data

Maximum lung growth attained: ( 1 ) Yes ( 0 ) No

Plateau started: ( 2 ) No plateau ( 1 ) Yes ( 0 ) No

Decline started: ( 1 ) Yes ( 0 ) No

AGE AT each of the following periods (use '99' if N/A):

Maximum Lung Growth: \_\_\_\_ . \_\_\_\_

Start of Plateau: \_\_\_\_ . \_\_\_\_

Start of Decline: \_\_\_\_ . \_\_\_\_

### Pre-BD FEV1 Data and Percentiles: 1758

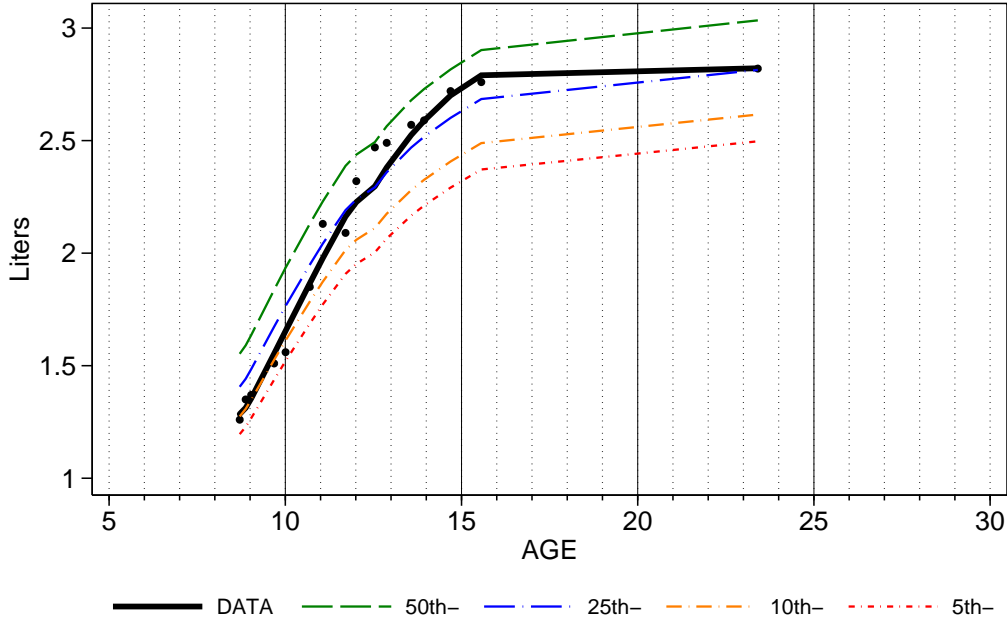

1758

**PATTERN OF GROWTH/DECLINE (Check One)**

- ( 1 ) Normal Growth
- ( 2 ) Normal Growth, Early Decline
- ( 3 ) Reduced Growth
- ( 4 ) Reduced Growth, Early Decline
- ( 9 ) Undetermined Pattern
- ( 8 ) Undetermined - not enough data

Maximum lung growth attained: ( 1 ) Yes ( 0 ) No

Plateau started: ( 2 ) No plateau ( 1 ) Yes ( 0 ) No

Decline started: ( 1 ) Yes ( 0 ) No

AGE AT each of the following periods (use '99' if N/A):

Maximum Lung Growth: \_\_\_\_ . \_\_\_\_

Start of Plateau: \_\_\_\_ . \_\_\_\_

Start of Decline: \_\_\_\_ . \_\_\_\_

### Pre-BD FEV1 Data and Percentiles: 1760

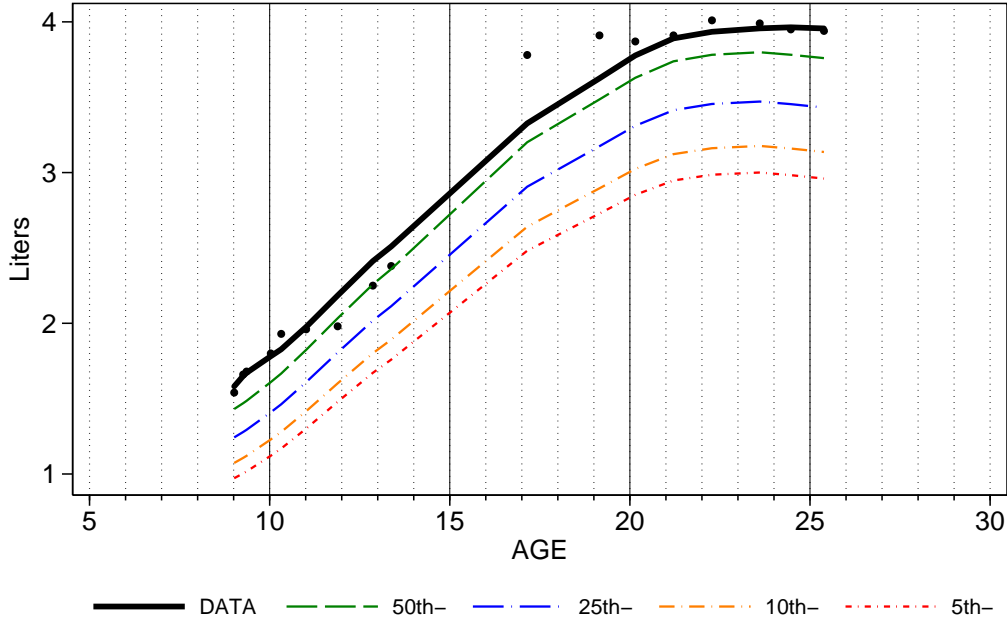

1760

**PATTERN OF GROWTH/DECLINE (Check One)**

- ( 1 ) Normal Growth
- ( 2 ) Normal Growth, Early Decline
- ( 3 ) Reduced Growth
- ( 4 ) Reduced Growth, Early Decline
- ( 9 ) Undetermined Pattern
- ( 8 ) Undetermined - not enough data

Maximum lung growth attained: ( 1 ) Yes ( 0 ) No

Plateau started: ( 2 ) No plateau ( 1 ) Yes ( 0 ) No

Decline started: ( 1 ) Yes ( 0 ) No

AGE AT each of the following periods (use '99' if N/A):

Maximum Lung Growth: \_\_\_\_ . \_\_\_\_

Start of Plateau: \_\_\_\_ . \_\_\_\_

Start of Decline: \_\_\_\_ . \_\_\_\_

### Pre-BD FEV1 Data and Percentiles: 1772

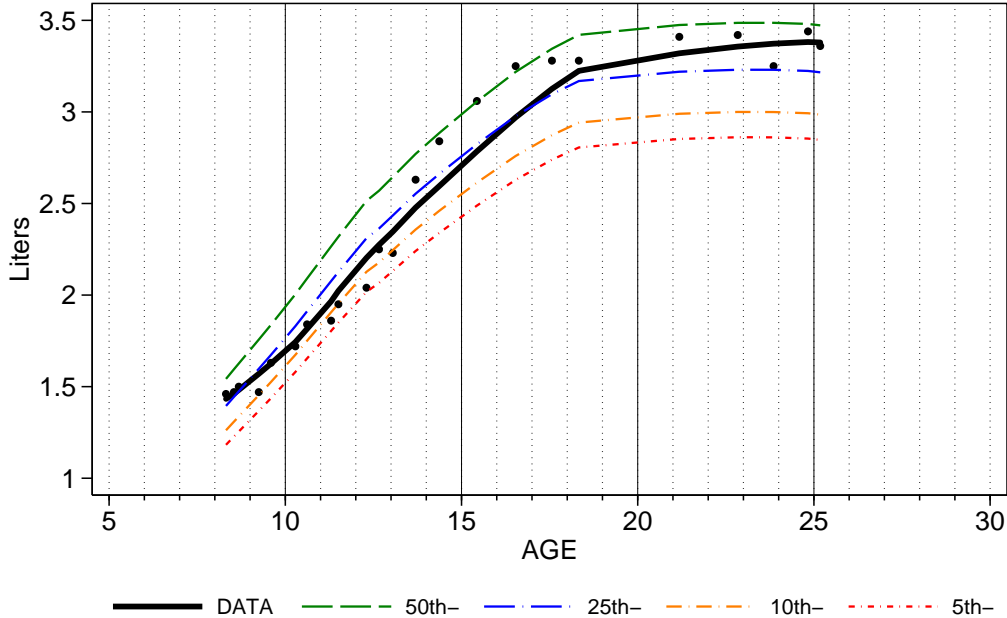

1772

**PATTERN OF GROWTH/DECLINE (Check One)**

- ( 1) Normal Growth
- ( 2) Normal Growth, Early Decline
- ( 3) Reduced Growth
- ( 4) Reduced Growth, Early Decline
- ( 9) Undetermined Pattern
- ( 8) Undetermined - not enough data

Maximum lung growth attained: ( 1) Yes ( 0) No

Plateau started: ( 2) No plateau ( 1) Yes ( 0) No

Decline started: ( 1) Yes ( 0) No

AGE AT each of the following periods (use '99' if N/A):

Maximum Lung Growth: \_\_\_\_ . \_\_\_\_

Start of Plateau: \_\_\_\_ . \_\_\_\_

Start of Decline: \_\_\_\_ . \_\_\_\_

### Pre-BD FEV1 Data and Percentiles: 1774

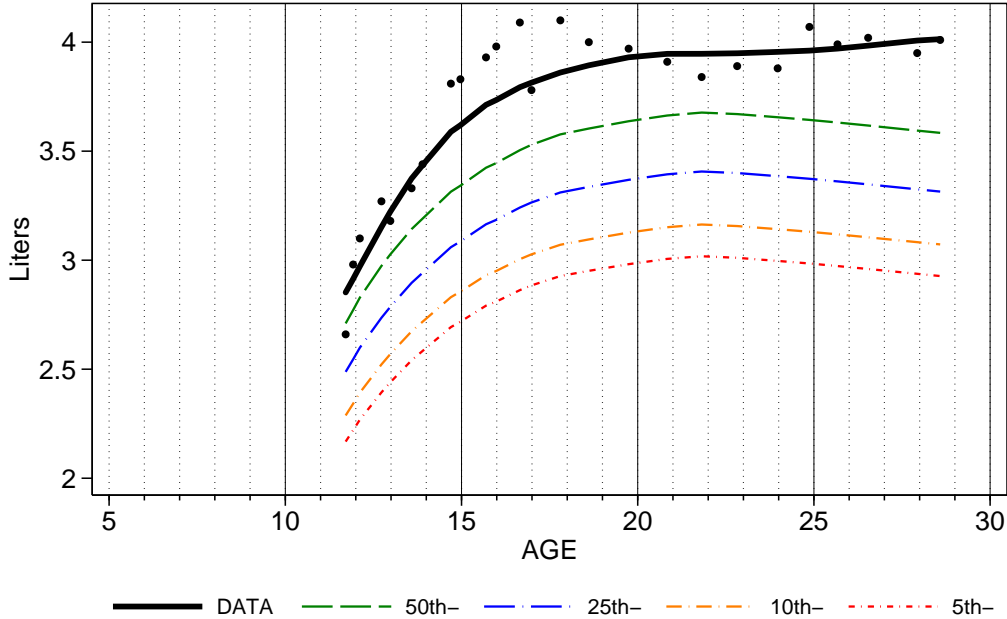

1774

**PATTERN OF GROWTH/DECLINE (Check One)**

- ( 1) Normal Growth
- ( 2) Normal Growth, Early Decline
- ( 3) Reduced Growth
- ( 4) Reduced Growth, Early Decline
- ( 9) Undetermined Pattern
- ( 8) Undetermined - not enough data

Maximum lung growth attained: ( 1) Yes ( 0) No

Plateau started: ( 2) No plateau ( 1) Yes ( 0) No

Decline started: ( 1) Yes ( 0) No

AGE AT each of the following periods (use '99' if N/A):

Maximum Lung Growth: \_\_\_\_ . \_\_\_\_

Start of Plateau: \_\_\_\_ . \_\_\_\_

Start of Decline: \_\_\_\_ . \_\_\_\_

### Pre-BD FEV1 Data and Percentiles: 1777

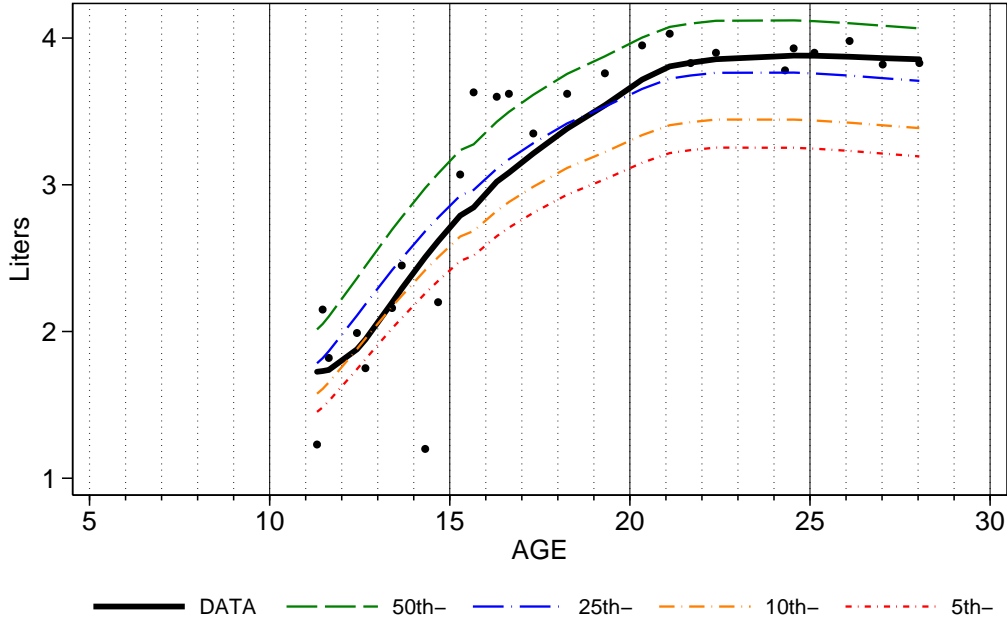

1777

**PATTERN OF GROWTH/DECLINE (Check One)**

- ( 1 ) Normal Growth
- ( 2 ) Normal Growth, Early Decline
- ( 3 ) Reduced Growth
- ( 4 ) Reduced Growth, Early Decline
- ( 9 ) Undetermined Pattern
- ( 8 ) Undetermined - not enough data

Maximum lung growth attained: ( 1 ) Yes ( 0 ) No

Plateau started: ( 2 ) No plateau ( 1 ) Yes ( 0 ) No

Decline started: ( 1 ) Yes ( 0 ) No

AGE AT each of the following periods (use '99' if N/A):

Maximum Lung Growth: \_\_\_\_ . \_\_\_\_

Start of Plateau: \_\_\_\_ . \_\_\_\_

Start of Decline: \_\_\_\_ . \_\_\_\_

### Pre-BD FEV1 Data and Percentiles: 1778

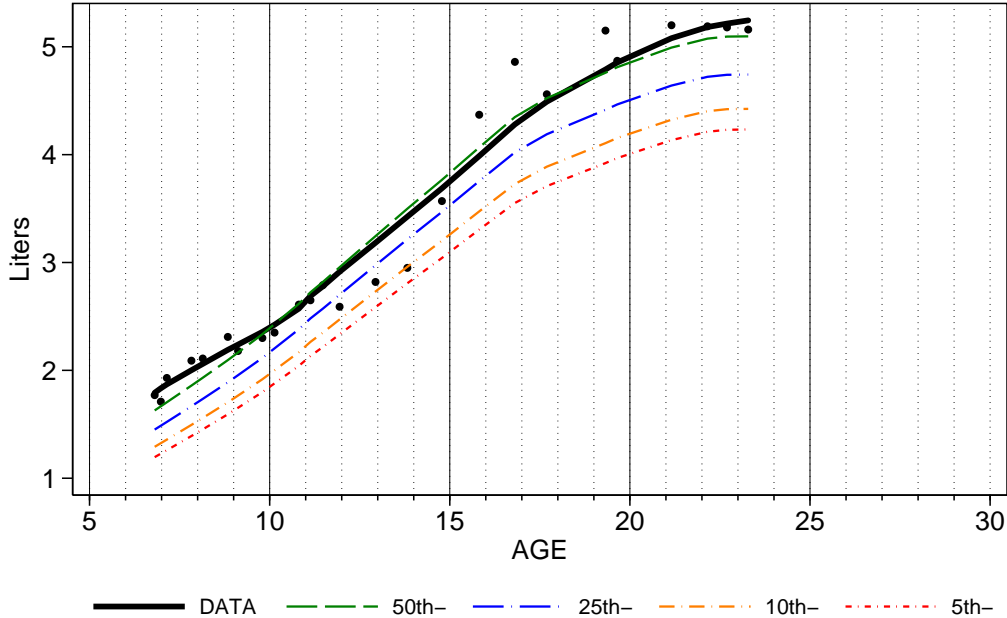

1778

**PATTERN OF GROWTH/DECLINE (Check One)**

- ( 1) Normal Growth
- ( 2) Normal Growth, Early Decline
- ( 3) Reduced Growth
- ( 4) Reduced Growth, Early Decline
- ( 9) Undetermined Pattern
- ( 8) Undetermined - not enough data

Maximum lung growth attained: ( 1) Yes ( 0) No

Plateau started: ( 2) No plateau ( 1) Yes ( 0) No

Decline started: ( 1) Yes ( 0) No

AGE AT each of the following periods (use '99' if N/A):

Maximum Lung Growth: \_\_\_\_ . \_\_\_\_

Start of Plateau: \_\_\_\_ . \_\_\_\_

Start of Decline: \_\_\_\_ . \_\_\_\_



### Pre-BD FEV1 Data and Percentiles: 1787

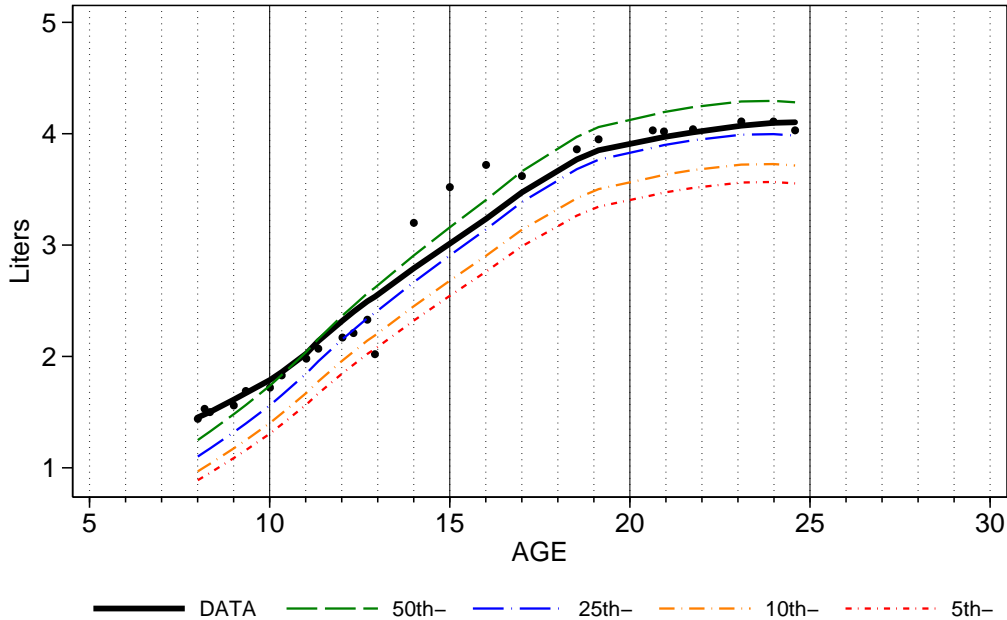

1787

**PATTERN OF GROWTH/DECLINE (Check One)**

- ( 1 ) Normal Growth
- ( 2 ) Normal Growth, Early Decline
- ( 3 ) Reduced Growth
- ( 4 ) Reduced Growth, Early Decline
- ( 9 ) Undetermined Pattern
- ( 8 ) Undetermined - not enough data

Maximum lung growth attained: ( 1 ) Yes ( 0 ) No

Plateau started: ( 2 ) No plateau ( 1 ) Yes ( 0 ) No

Decline started: ( 1 ) Yes ( 0 ) No

AGE AT each of the following periods (use '99' if N/A):

Maximum Lung Growth: \_\_\_\_ . \_\_\_\_

Start of Plateau: \_\_\_\_ . \_\_\_\_

Start of Decline: \_\_\_\_ . \_\_\_\_

### Pre-BD FEV1 Data and Percentiles: 1791

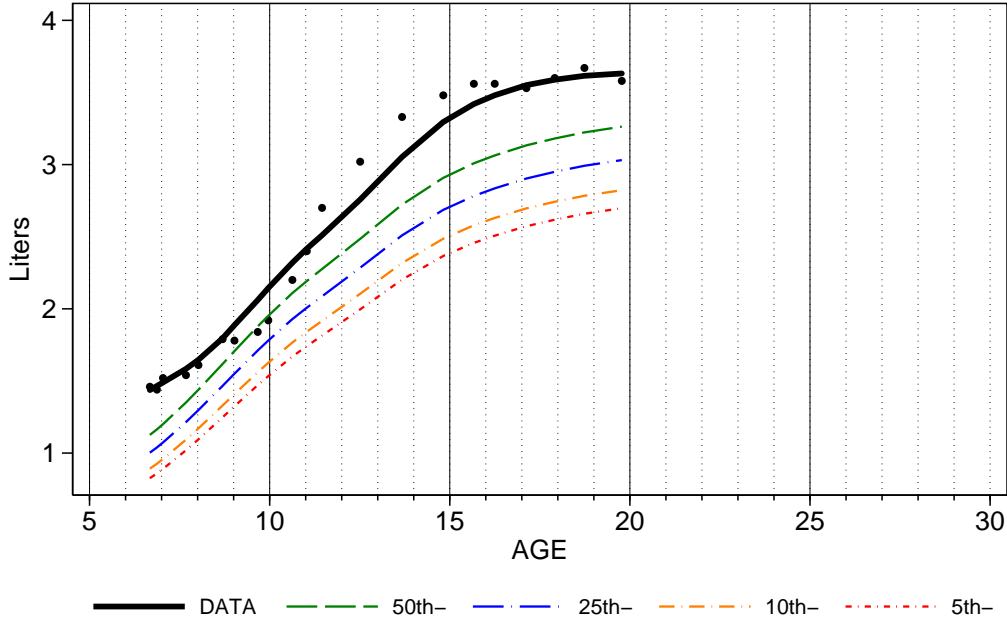

1791

**PATTERN OF GROWTH/DECLINE (Check One)**

- ( 1) Normal Growth
- ( 2) Normal Growth, Early Decline
- ( 3) Reduced Growth
- ( 4) Reduced Growth, Early Decline
- ( 9) Undetermined Pattern
- ( 8) Undetermined - not enough data

Maximum lung growth attained: ( 1) Yes ( 0) No

Plateau started: ( 2) No plateau ( 1) Yes ( 0) No

Decline started: ( 1) Yes ( 0) No

AGE AT each of the following periods (use '99' if N/A):

Maximum Lung Growth: \_\_\_\_ . \_\_\_\_

Start of Plateau: \_\_\_\_ . \_\_\_\_

Start of Decline: \_\_\_\_ . \_\_\_\_

### Pre-BD FEV1 Data and Percentiles: 1797

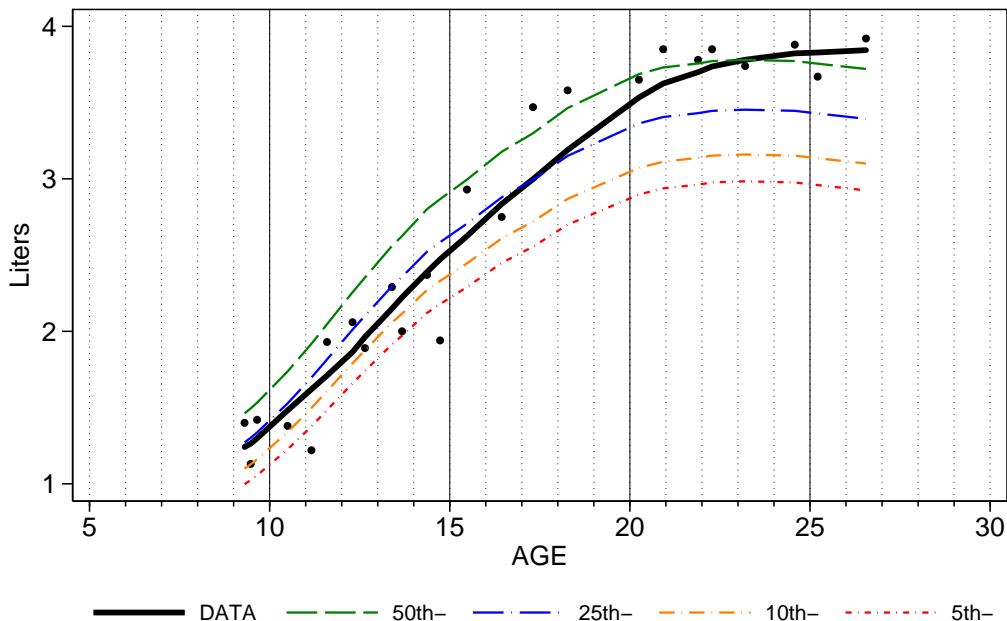

1797

**PATTERN OF GROWTH/DECLINE (Check One)**

- ( 1 ) Normal Growth
- ( 2 ) Normal Growth, Early Decline
- ( 3 ) Reduced Growth
- ( 4 ) Reduced Growth, Early Decline
- ( 9 ) Undetermined Pattern
- ( 8 ) Undetermined - not enough data

Maximum lung growth attained: ( 1 ) Yes ( 0 ) No

Plateau started: ( 2 ) No plateau ( 1 ) Yes ( 0 ) No

Decline started: ( 1 ) Yes ( 0 ) No

AGE AT each of the following periods (use '99' if N/A):

Maximum Lung Growth: \_\_\_\_ . \_\_\_\_

Start of Plateau: \_\_\_\_ . \_\_\_\_

Start of Decline: \_\_\_\_ . \_\_\_\_

### Pre-BD FEV1 Data and Percentiles: 1806

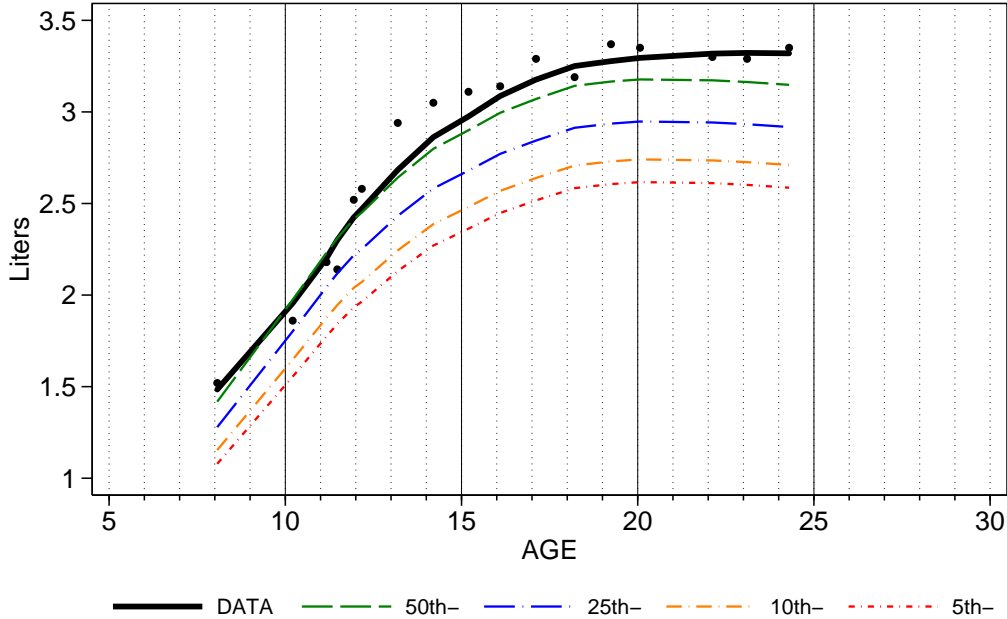

1806

**PATTERN OF GROWTH/DECLINE (Check One)**

- ( 1 ) Normal Growth
- ( 2 ) Normal Growth, Early Decline
- ( 3 ) Reduced Growth
- ( 4 ) Reduced Growth, Early Decline
- ( 9 ) Undetermined Pattern
- ( 8 ) Undetermined - not enough data

Maximum lung growth attained: ( 1 ) Yes ( 0 ) No

Plateau started: ( 2 ) No plateau ( 1 ) Yes ( 0 ) No

Decline started: ( 1 ) Yes ( 0 ) No

AGE AT each of the following periods (use '99' if N/A):

Maximum Lung Growth: \_\_\_\_ . \_\_\_\_

Start of Plateau: \_\_\_\_ . \_\_\_\_

Start of Decline: \_\_\_\_ . \_\_\_\_

### Pre-BD FEV1 Data and Percentiles: 1807

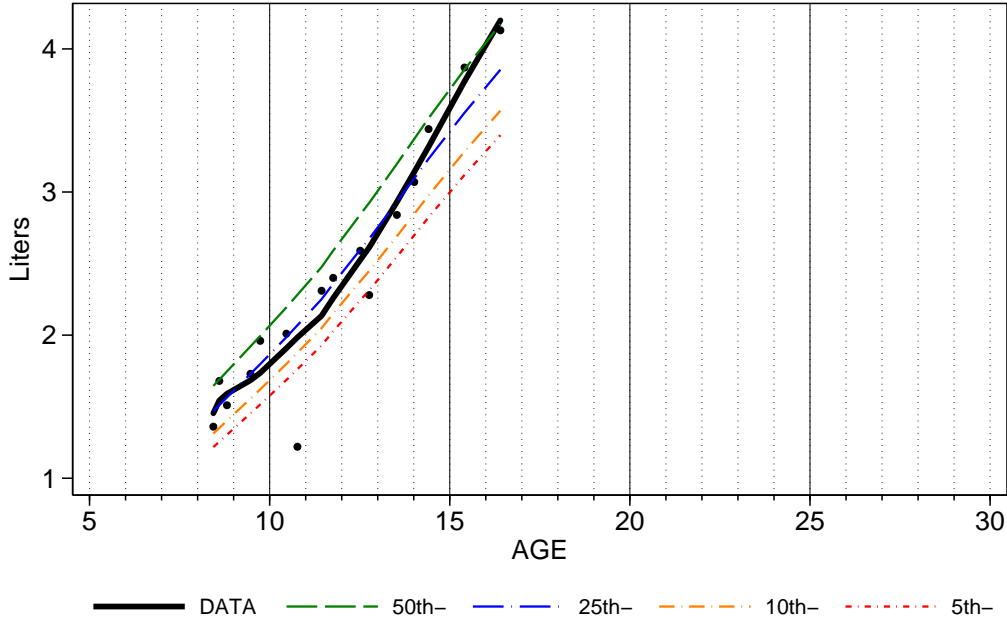

1807

**PATTERN OF GROWTH/DECLINE (Check One)**

- ( 1 ) Normal Growth
- ( 2 ) Normal Growth, Early Decline
- ( 3 ) Reduced Growth
- ( 4 ) Reduced Growth, Early Decline
- ( 9 ) Undetermined Pattern
- ( 8 ) Undetermined - not enough data

Maximum lung growth attained: ( 1 ) Yes ( 0 ) No

Plateau started: ( 2 ) No plateau ( 1 ) Yes ( 0 ) No

Decline started: ( 1 ) Yes ( 0 ) No

AGE AT each of the following periods (use '99' if N/A):

Maximum Lung Growth: \_\_\_\_ . \_\_\_\_

Start of Plateau: \_\_\_\_ . \_\_\_\_

Start of Decline: \_\_\_\_ . \_\_\_\_

### Pre-BD FEV1 Data and Percentiles: 1809

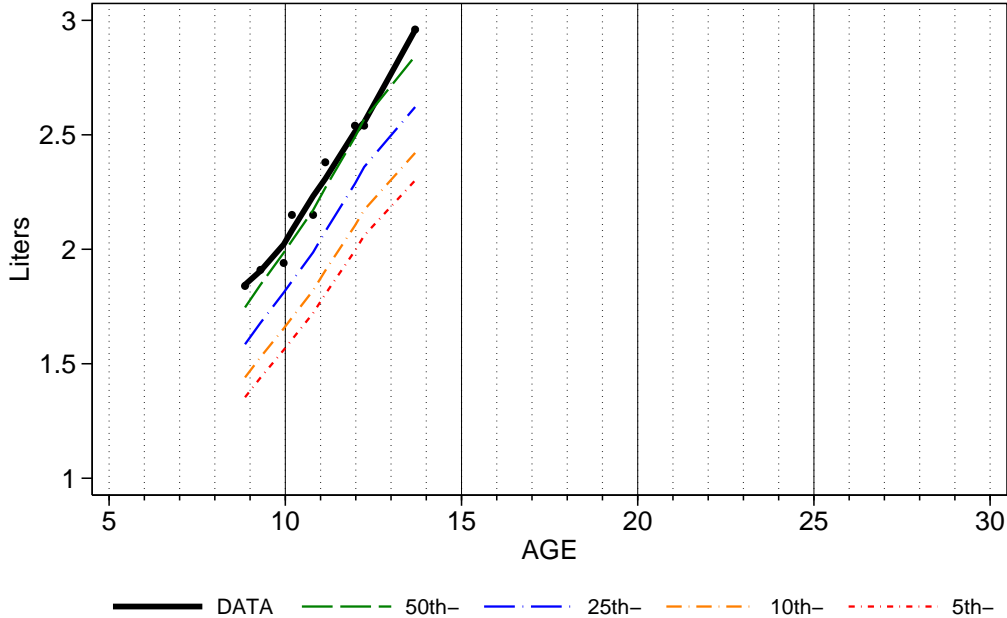

1809

**PATTERN OF GROWTH/DECLINE (Check One)**

- ( 1 ) Normal Growth
- ( 2 ) Normal Growth, Early Decline
- ( 3 ) Reduced Growth
- ( 4 ) Reduced Growth, Early Decline
- ( 9 ) Undetermined Pattern
- ( 8 ) Undetermined - not enough data

Maximum lung growth attained: ( 1 ) Yes ( 0 ) No

Plateau started: ( 2 ) No plateau ( 1 ) Yes ( 0 ) No

Decline started: ( 1 ) Yes ( 0 ) No

AGE AT each of the following periods (use '99' if N/A):

Maximum Lung Growth: \_\_\_\_ . \_\_\_\_

Start of Plateau: \_\_\_\_ . \_\_\_\_

Start of Decline: \_\_\_\_ . \_\_\_\_

### Pre-BD FEV1 Data and Percentiles: 1813

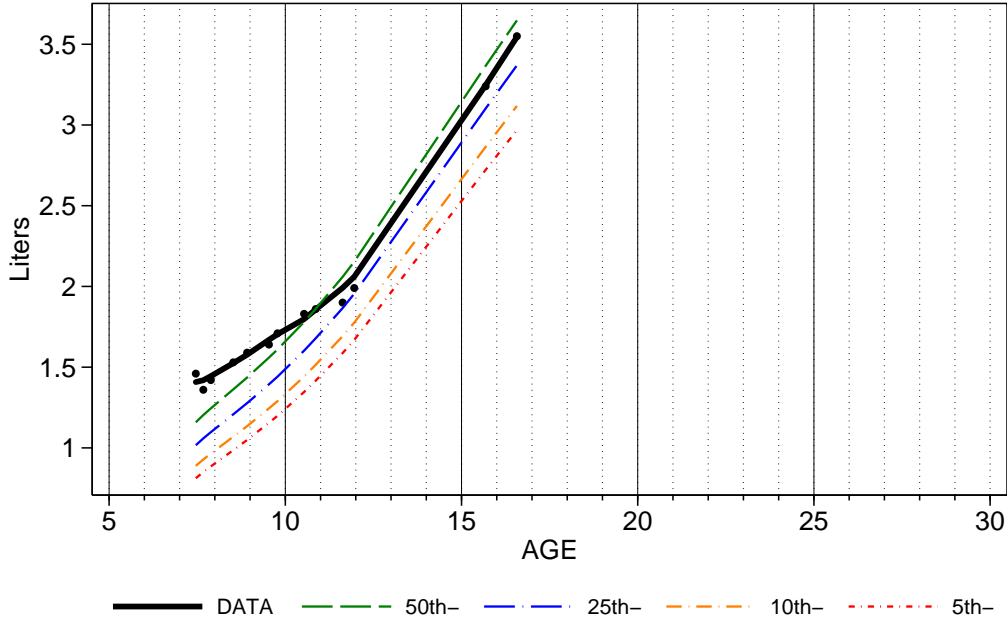

1813

**PATTERN OF GROWTH/DECLINE (Check One)**

- ( 1 ) Normal Growth
- ( 2 ) Normal Growth, Early Decline
- ( 3 ) Reduced Growth
- ( 4 ) Reduced Growth, Early Decline
- ( 9 ) Undetermined Pattern
- ( 8 ) Undetermined - not enough data

Maximum lung growth attained: ( 1 ) Yes ( 0 ) No

Plateau started: ( 2 ) No plateau ( 1 ) Yes ( 0 ) No

Decline started: ( 1 ) Yes ( 0 ) No

AGE AT each of the following periods (use '99' if N/A):

Maximum Lung Growth: \_\_\_\_ . \_\_\_\_

Start of Plateau: \_\_\_\_ . \_\_\_\_

Start of Decline: \_\_\_\_ . \_\_\_\_

### Pre-BD FEV1 Data and Percentiles: 1815

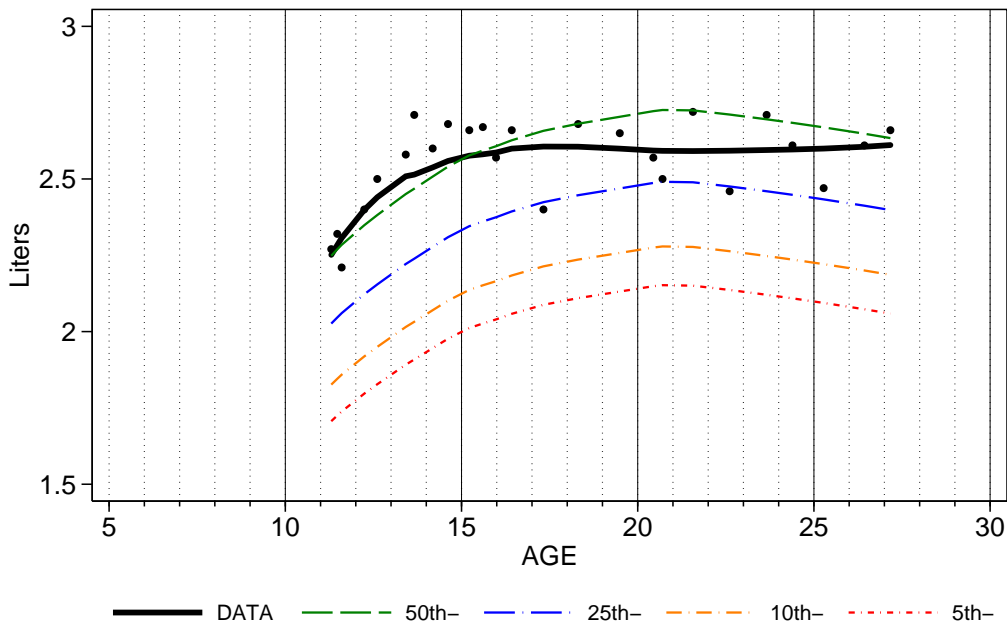

1815

**PATTERN OF GROWTH/DECLINE (Check One)**

- ( 1) Normal Growth
- ( 2) Normal Growth, Early Decline
- ( 3) Reduced Growth
- ( 4) Reduced Growth, Early Decline
- ( 9) Undetermined Pattern
- ( 8) Undetermined - not enough data

Maximum lung growth attained: ( 1) Yes ( 0) No

Plateau started: ( 2) No plateau ( 1) Yes ( 0) No

Decline started: ( 1) Yes ( 0) No

AGE AT each of the following periods (use '99' if N/A):

Maximum Lung Growth: \_\_\_\_ . \_\_\_\_

Start of Plateau: \_\_\_\_ . \_\_\_\_

Start of Decline: \_\_\_\_ . \_\_\_\_



### Pre-BD FEV1 Data and Percentiles: 1817

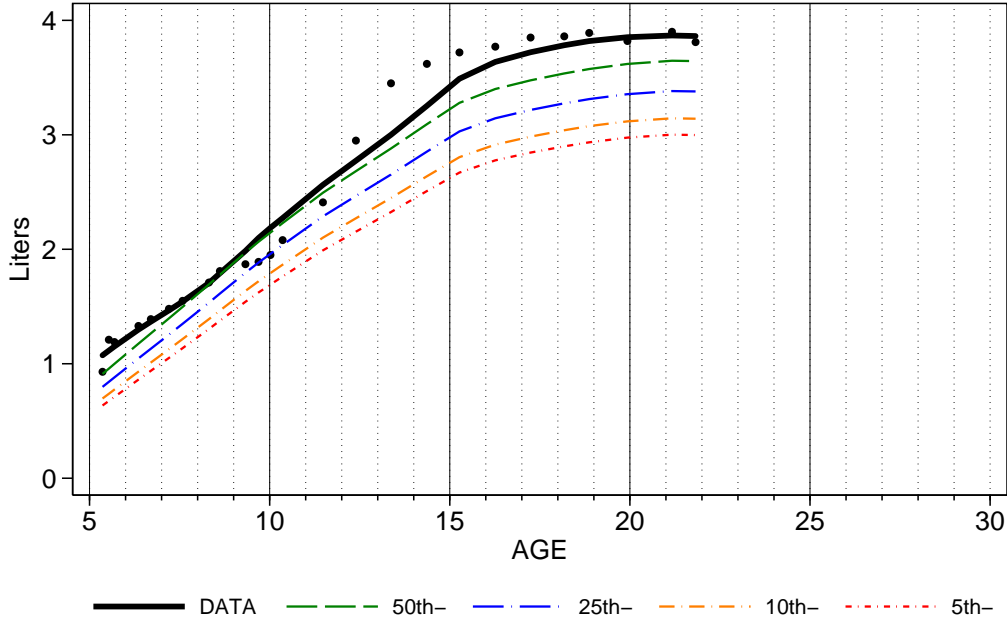

1817

**PATTERN OF GROWTH/DECLINE (Check One)**

- ( 1 ) Normal Growth
- ( 2 ) Normal Growth, Early Decline
- ( 3 ) Reduced Growth
- ( 4 ) Reduced Growth, Early Decline
- ( 9 ) Undetermined Pattern
- ( 8 ) Undetermined - not enough data

Maximum lung growth attained: ( 1 ) Yes ( 0 ) No

Plateau started: ( 2 ) No plateau ( 1 ) Yes ( 0 ) No

Decline started: ( 1 ) Yes ( 0 ) No

AGE AT each of the following periods (use '99' if N/A):

Maximum Lung Growth: \_\_\_\_ . \_\_\_\_

Start of Plateau: \_\_\_\_ . \_\_\_\_

Start of Decline: \_\_\_\_ . \_\_\_\_

### Pre-BD FEV1 Data and Percentiles: 1818

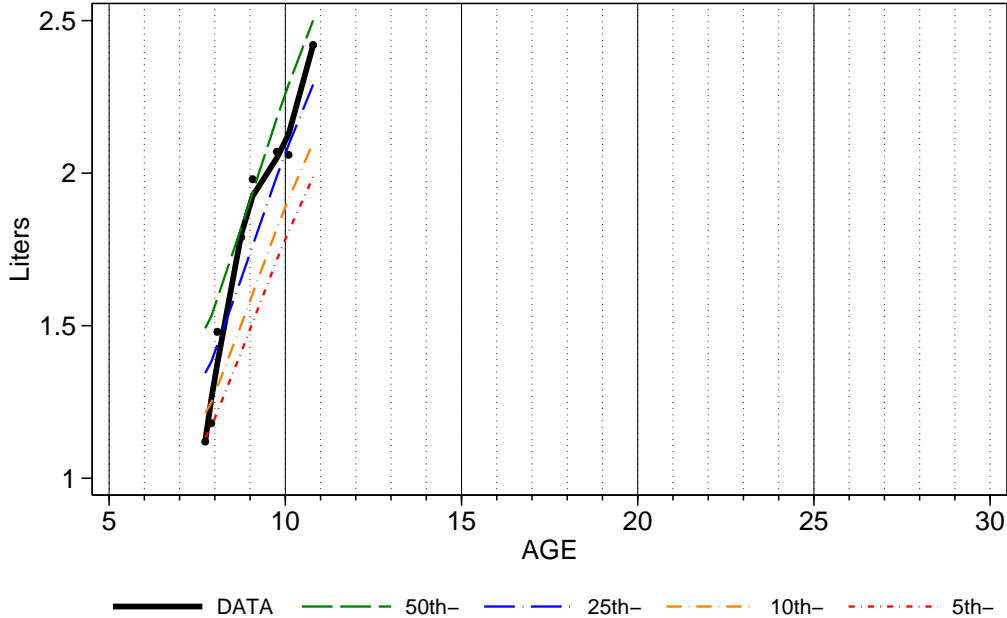

1818

**PATTERN OF GROWTH/DECLINE (Check One)**

- ( 1) Normal Growth
- ( 2) Normal Growth, Early Decline
- ( 3) Reduced Growth
- ( 4) Reduced Growth, Early Decline
- ( 9) Undetermined Pattern
- ( 8) Undetermined - not enough data

Maximum lung growth attained: ( 1) Yes ( 0) No

Plateau started: ( 2) No plateau ( 1) Yes ( 0) No

Decline started: ( 1) Yes ( 0) No

AGE AT each of the following periods (use '99' if N/A):

Maximum Lung Growth: \_\_\_\_ . \_\_\_\_

Start of Plateau: \_\_\_\_ . \_\_\_\_

Start of Decline: \_\_\_\_ . \_\_\_\_

### Pre-BD FEV1 Data and Percentiles: 1822

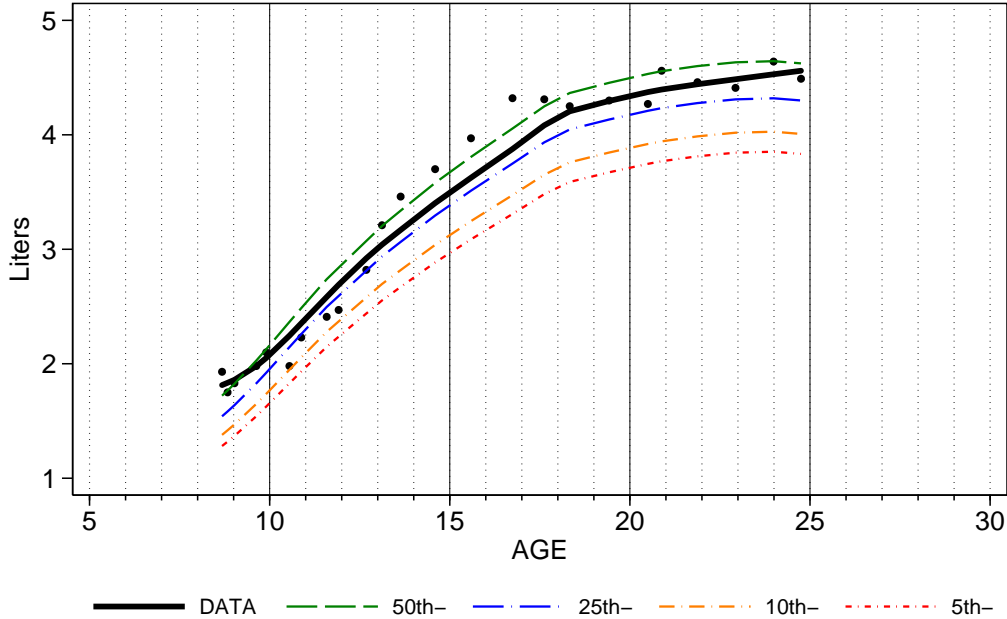

1822

**PATTERN OF GROWTH/DECLINE (Check One)**

- ( 1 ) Normal Growth
- ( 2 ) Normal Growth, Early Decline
- ( 3 ) Reduced Growth
- ( 4 ) Reduced Growth, Early Decline
- ( 9 ) Undetermined Pattern
- ( 8 ) Undetermined - not enough data

Maximum lung growth attained: ( 1 ) Yes ( 0 ) No

Plateau started: ( 2 ) No plateau ( 1 ) Yes ( 0 ) No

Decline started: ( 1 ) Yes ( 0 ) No

AGE AT each of the following periods (use '99' if N/A):

Maximum Lung Growth: \_\_\_\_ . \_\_\_\_

Start of Plateau: \_\_\_\_ . \_\_\_\_

Start of Decline: \_\_\_\_ . \_\_\_\_

### Pre-BD FEV1 Data and Percentiles: 1826

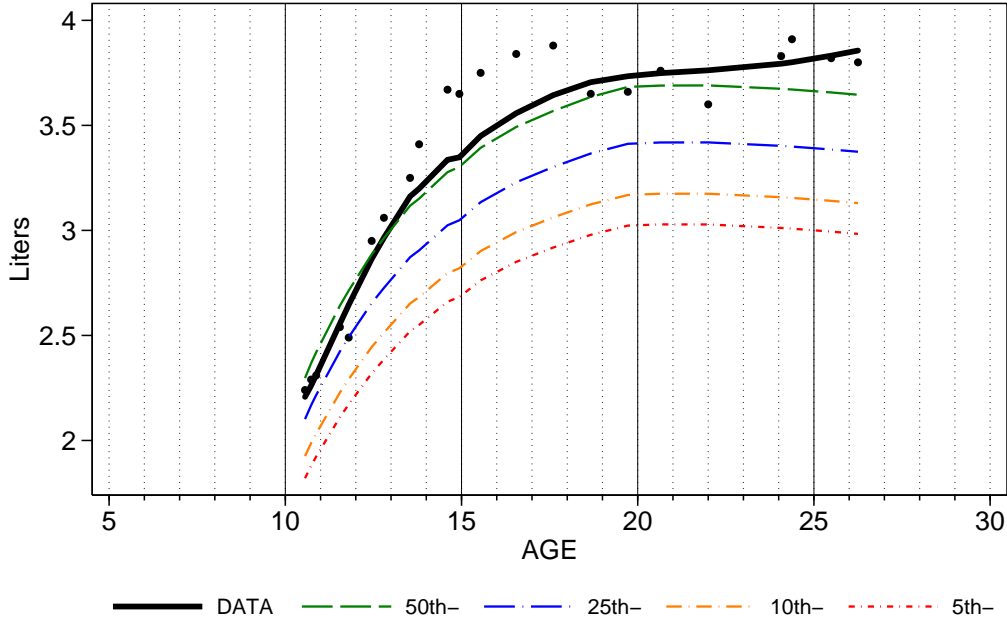

1826

**PATTERN OF GROWTH/DECLINE (Check One)**

- ( 1) Normal Growth
- ( 2) Normal Growth, Early Decline
- ( 3) Reduced Growth
- ( 4) Reduced Growth, Early Decline
- ( 9) Undetermined Pattern
- ( 8) Undetermined - not enough data

Maximum lung growth attained: ( 1) Yes ( 0) No

Plateau started: ( 2) No plateau ( 1) Yes ( 0) No

Decline started: ( 1) Yes ( 0) No

AGE AT each of the following periods (use '99' if N/A):

Maximum Lung Growth: \_\_\_\_ . \_\_\_\_

Start of Plateau: \_\_\_\_ . \_\_\_\_

Start of Decline: \_\_\_\_ . \_\_\_\_

### Pre-BD FEV1 Data and Percentiles: 1827

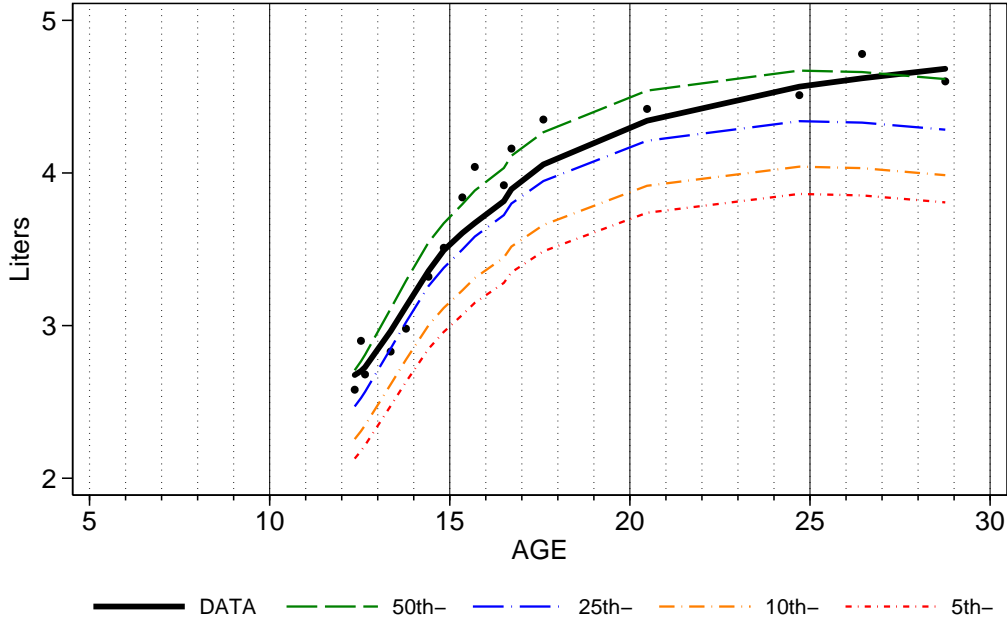

1827

**PATTERN OF GROWTH/DECLINE (Check One)**

- ( 1) Normal Growth
- ( 2) Normal Growth, Early Decline
- ( 3) Reduced Growth
- ( 4) Reduced Growth, Early Decline
- ( 9) Undetermined Pattern
- ( 8) Undetermined - not enough data

Maximum lung growth attained: ( 1) Yes ( 0) No

Plateau started: ( 2) No plateau ( 1) Yes ( 0) No

Decline started: ( 1) Yes ( 0) No

AGE AT each of the following periods (use '99' if N/A):

Maximum Lung Growth: \_\_\_\_ . \_\_\_\_

Start of Plateau: \_\_\_\_ . \_\_\_\_

Start of Decline: \_\_\_\_ . \_\_\_\_

### Pre-BD FEV1 Data and Percentiles: 1828

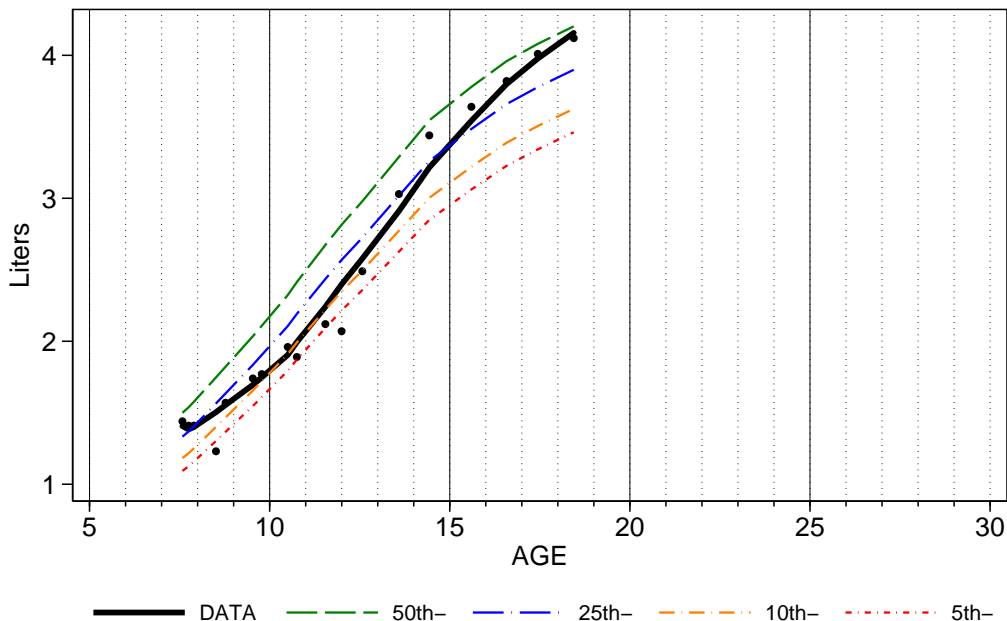

1828

**PATTERN OF GROWTH/DECLINE (Check One)**

- ( 1 ) Normal Growth
- ( 2 ) Normal Growth, Early Decline
- ( 3 ) Reduced Growth
- ( 4 ) Reduced Growth, Early Decline
- ( 9 ) Undetermined Pattern
- ( 8 ) Undetermined - not enough data

Maximum lung growth attained: ( 1 ) Yes ( 0 ) No

Plateau started: ( 2 ) No plateau ( 1 ) Yes ( 0 ) No

Decline started: ( 1 ) Yes ( 0 ) No

AGE AT each of the following periods (use '99' if N/A):

Maximum Lung Growth: \_\_\_\_ . \_\_\_\_

Start of Plateau: \_\_\_\_ . \_\_\_\_

Start of Decline: \_\_\_\_ . \_\_\_\_

### Pre-BD FEV1 Data and Percentiles: 1830

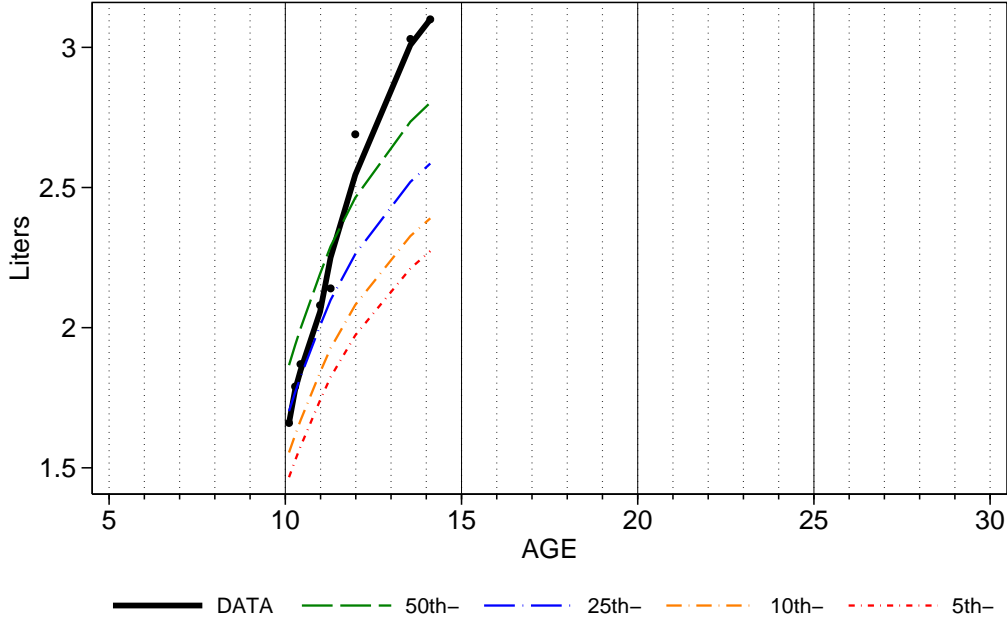

1830

**PATTERN OF GROWTH/DECLINE (Check One)**

- ( 1 ) Normal Growth
- ( 2 ) Normal Growth, Early Decline
- ( 3 ) Reduced Growth
- ( 4 ) Reduced Growth, Early Decline
- ( 9 ) Undetermined Pattern
- ( 8 ) Undetermined - not enough data

Maximum lung growth attained: ( 1 ) Yes ( 0 ) No

Plateau started: ( 2 ) No plateau ( 1 ) Yes ( 0 ) No

Decline started: ( 1 ) Yes ( 0 ) No

AGE AT each of the following periods (use '99' if N/A):

Maximum Lung Growth: \_\_\_\_ . \_\_\_\_

Start of Plateau: \_\_\_\_ . \_\_\_\_

Start of Decline: \_\_\_\_ . \_\_\_\_

### Pre-BD FEV1 Data and Percentiles: 1840

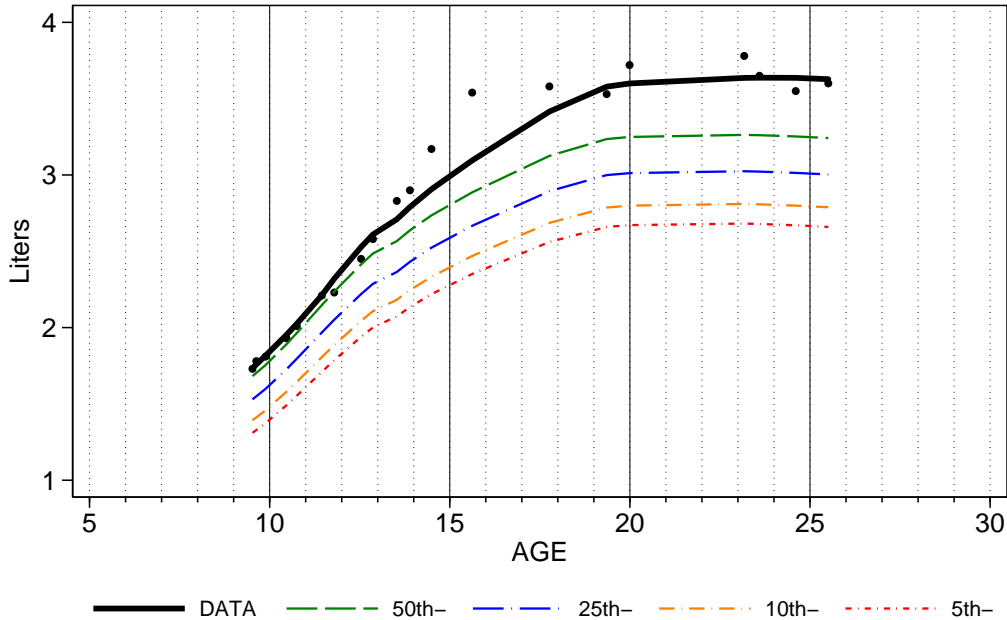

1840

**PATTERN OF GROWTH/DECLINE (Check One)**

- ( 1 ) Normal Growth
- ( 2 ) Normal Growth, Early Decline
- ( 3 ) Reduced Growth
- ( 4 ) Reduced Growth, Early Decline
- ( 9 ) Undetermined Pattern
- ( 8 ) Undetermined - not enough data

Maximum lung growth attained: ( 1 ) Yes ( 0 ) No

Plateau started: ( 2 ) No plateau ( 1 ) Yes ( 0 ) No

Decline started: ( 1 ) Yes ( 0 ) No

AGE AT each of the following periods (use '99' if N/A):

Maximum Lung Growth: \_\_\_\_ . \_\_\_\_

Start of Plateau: \_\_\_\_ . \_\_\_\_

Start of Decline: \_\_\_\_ . \_\_\_\_



### Pre-BD FEV1 Data and Percentiles: 1842

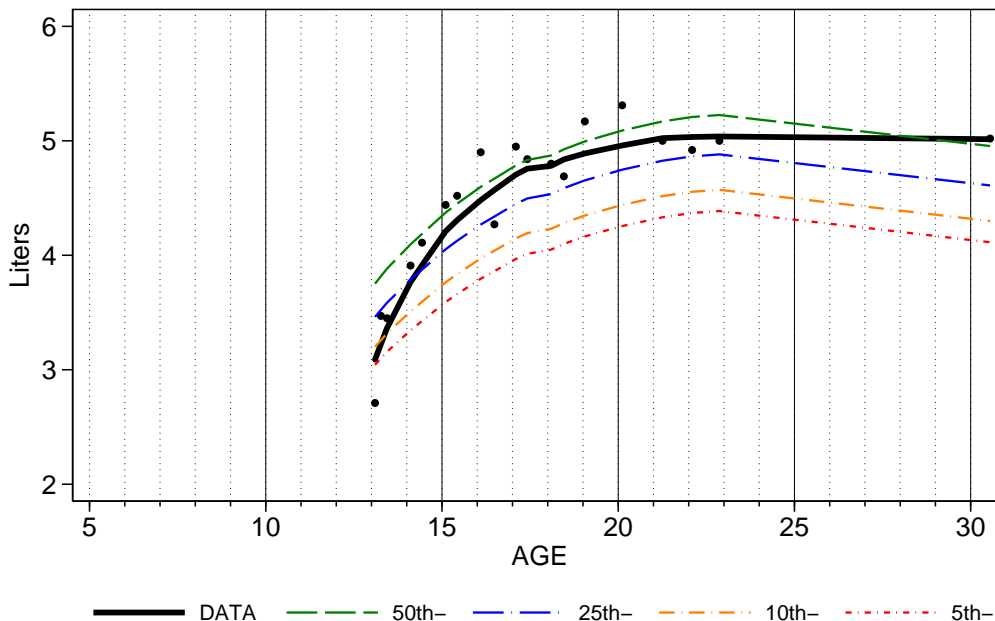

1842

**PATTERN OF GROWTH/DECLINE (Check One)**

- ( 1 ) Normal Growth
- ( 2 ) Normal Growth, Early Decline
- ( 3 ) Reduced Growth
- ( 4 ) Reduced Growth, Early Decline
- ( 9 ) Undetermined Pattern
- ( 8 ) Undetermined - not enough data

Maximum lung growth attained: ( 1 ) Yes ( 0 ) No

Plateau started: ( 2 ) No plateau ( 1 ) Yes ( 0 ) No

Decline started: ( 1 ) Yes ( 0 ) No

AGE AT each of the following periods (use '99' if N/A):

Maximum Lung Growth: \_\_\_\_ . \_\_\_\_

Start of Plateau: \_\_\_\_ . \_\_\_\_

Start of Decline: \_\_\_\_ . \_\_\_\_

### Pre-BD FEV1 Data and Percentiles: 1850

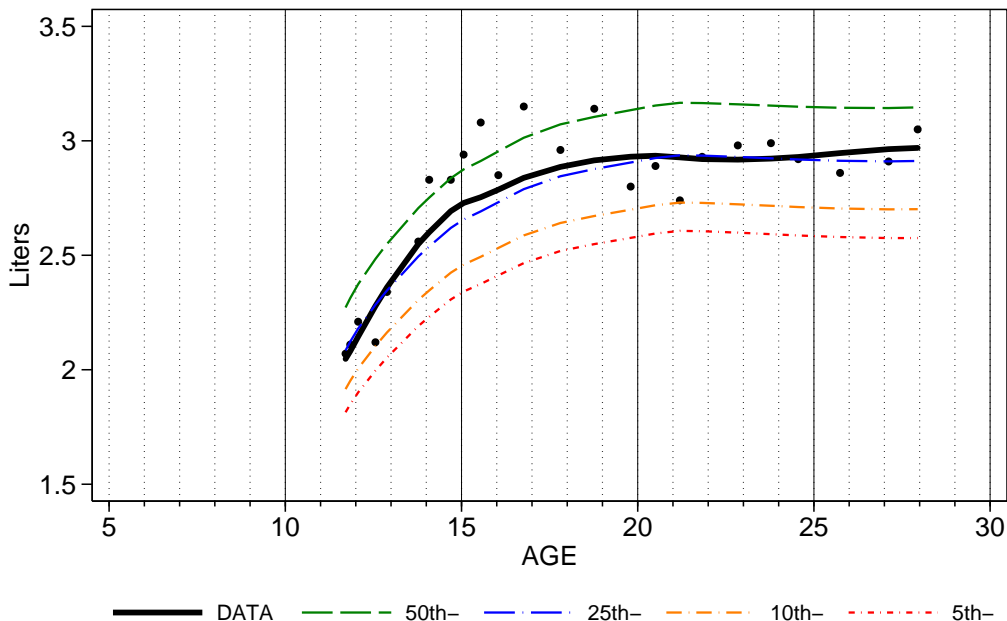

1850

**PATTERN OF GROWTH/DECLINE (Check One)**

- ( 1) Normal Growth
- ( 2) Normal Growth, Early Decline
- ( 3) Reduced Growth
- ( 4) Reduced Growth, Early Decline
- ( 9) Undetermined Pattern
- ( 8) Undetermined - not enough data

Maximum lung growth attained: ( 1) Yes ( 0) No

Plateau started: ( 2) No plateau ( 1) Yes ( 0) No

Decline started: ( 1) Yes ( 0) No

AGE AT each of the following periods (use '99' if N/A):

Maximum Lung Growth: \_\_\_\_ . \_\_\_\_

Start of Plateau: \_\_\_\_ . \_\_\_\_

Start of Decline: \_\_\_\_ . \_\_\_\_

### Pre-BD FEV1 Data and Percentiles: 1863

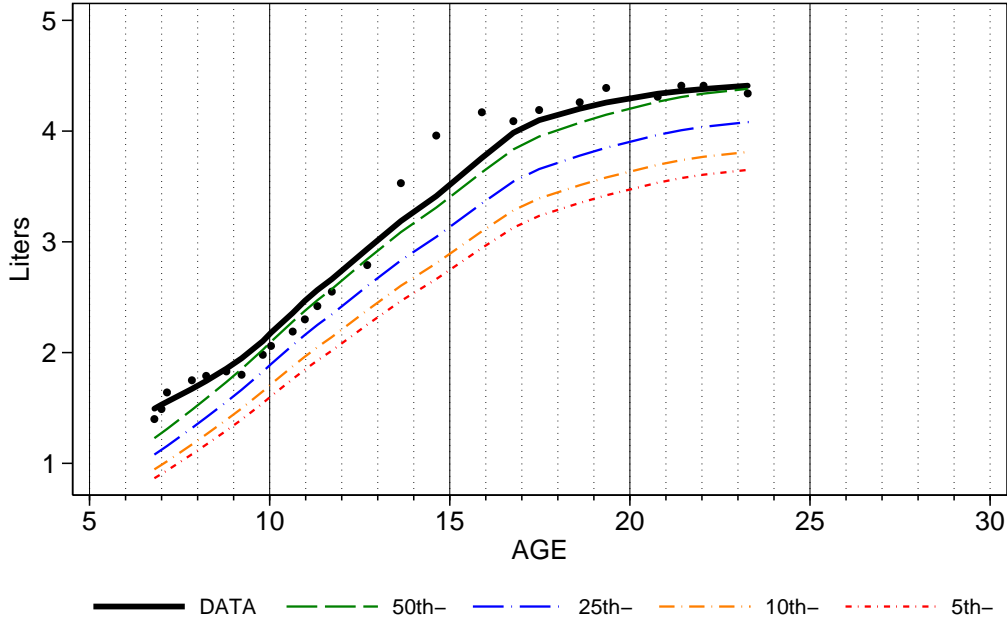

1863

**PATTERN OF GROWTH/DECLINE (Check One)**

- ( 1 ) Normal Growth
- ( 2 ) Normal Growth, Early Decline
- ( 3 ) Reduced Growth
- ( 4 ) Reduced Growth, Early Decline
- ( 9 ) Undetermined Pattern
- ( 8 ) Undetermined - not enough data

Maximum lung growth attained: ( 1 ) Yes ( 0 ) No

Plateau started: ( 2 ) No plateau ( 1 ) Yes ( 0 ) No

Decline started: ( 1 ) Yes ( 0 ) No

AGE AT each of the following periods (use '99' if N/A):

Maximum Lung Growth: \_\_\_\_ . \_\_\_\_

Start of Plateau: \_\_\_\_ . \_\_\_\_

Start of Decline: \_\_\_\_ . \_\_\_\_

### Pre-BD FEV1 Data and Percentiles: 1869

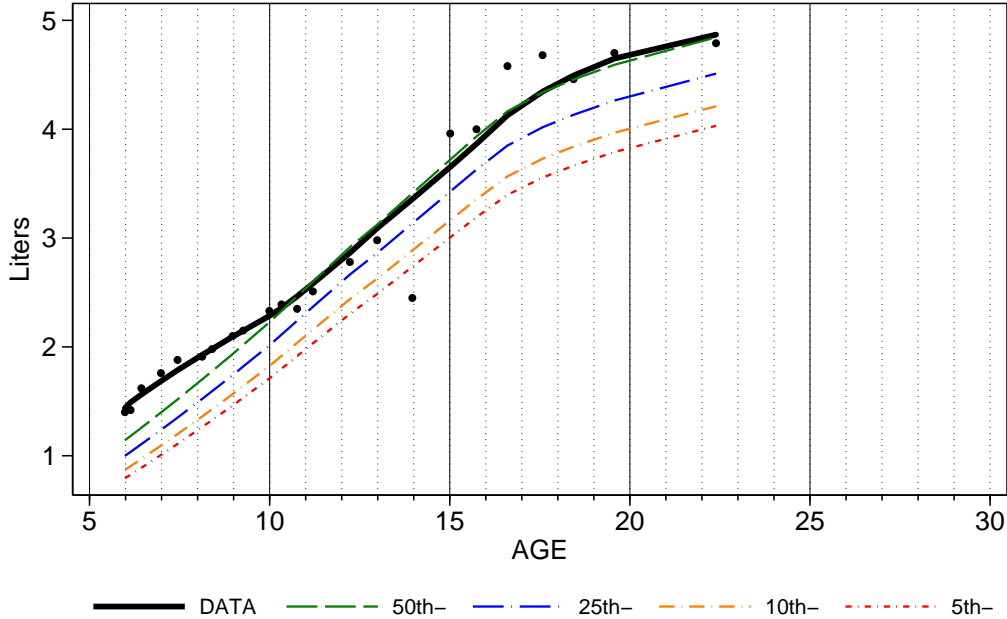

1869

**PATTERN OF GROWTH/DECLINE (Check One)**

- ( 1) Normal Growth
- ( 2) Normal Growth, Early Decline
- ( 3) Reduced Growth
- ( 4) Reduced Growth, Early Decline
- ( 9) Undetermined Pattern
- ( 8) Undetermined - not enough data

Maximum lung growth attained: ( 1) Yes ( 0) No

Plateau started: ( 2) No plateau ( 1) Yes ( 0) No

Decline started: ( 1) Yes ( 0) No

AGE AT each of the following periods (use '99' if N/A):

Maximum Lung Growth: \_\_\_\_ . \_\_\_\_

Start of Plateau: \_\_\_\_ . \_\_\_\_

Start of Decline: \_\_\_\_ . \_\_\_\_

### Pre-BD FEV1 Data and Percentiles: 1875

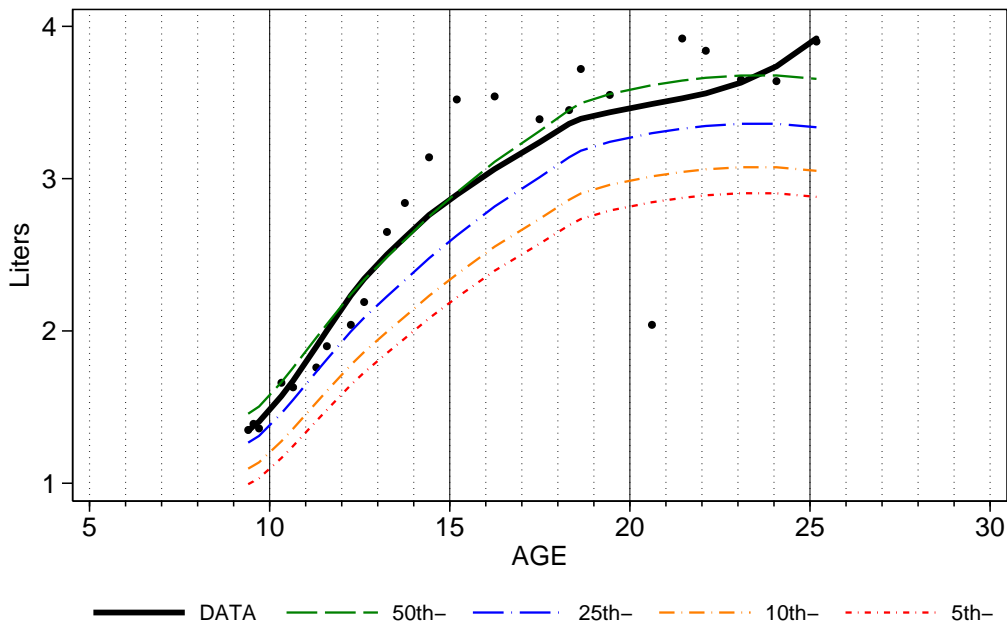

1875

**PATTERN OF GROWTH/DECLINE (Check One)**

- ( 1 ) Normal Growth
- ( 2 ) Normal Growth, Early Decline
- ( 3 ) Reduced Growth
- ( 4 ) Reduced Growth, Early Decline
- ( 9 ) Undetermined Pattern
- ( 8 ) Undetermined - not enough data

Maximum lung growth attained: ( 1 ) Yes ( 0 ) No

Plateau started: ( 2 ) No plateau ( 1 ) Yes ( 0 ) No

Decline started: ( 1 ) Yes ( 0 ) No

AGE AT each of the following periods (use '99' if N/A):

Maximum Lung Growth: \_\_\_\_ . \_\_\_\_

Start of Plateau: \_\_\_\_ . \_\_\_\_

Start of Decline: \_\_\_\_ . \_\_\_\_

### Pre-BD FEV1 Data and Percentiles: 1877

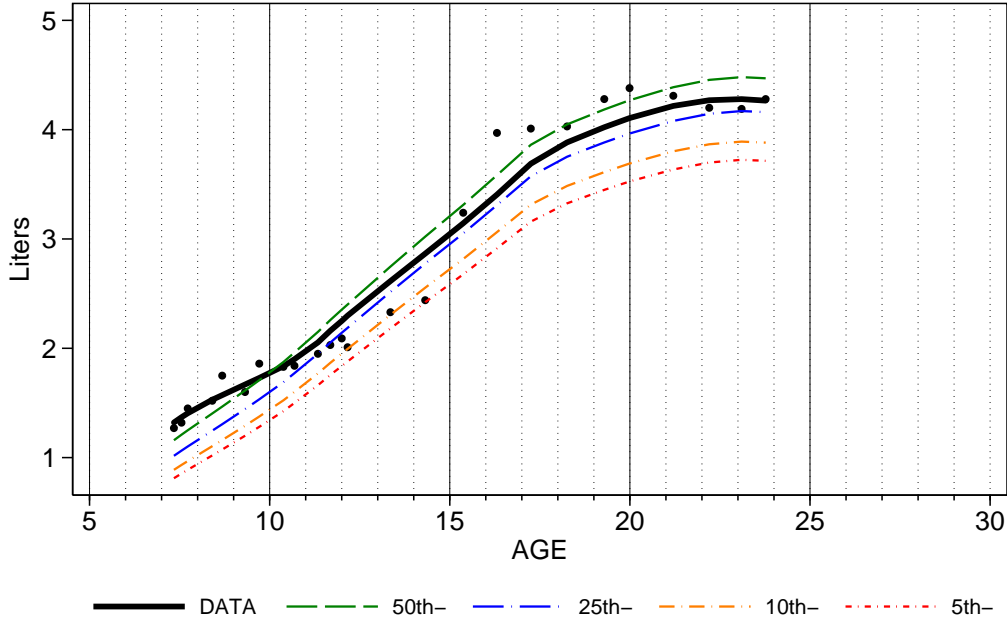

1877

**PATTERN OF GROWTH/DECLINE (Check One)**

- ( 1 ) Normal Growth
- ( 2 ) Normal Growth, Early Decline
- ( 3 ) Reduced Growth
- ( 4 ) Reduced Growth, Early Decline
- ( 9 ) Undetermined Pattern
- ( 8 ) Undetermined - not enough data

Maximum lung growth attained: ( 1 ) Yes ( 0 ) No

Plateau started: ( 2 ) No plateau ( 1 ) Yes ( 0 ) No

Decline started: ( 1 ) Yes ( 0 ) No

AGE AT each of the following periods (use '99' if N/A):

Maximum Lung Growth: \_\_\_\_ . \_\_\_\_

Start of Plateau: \_\_\_\_ . \_\_\_\_

Start of Decline: \_\_\_\_ . \_\_\_\_

### Pre-BD FEV1 Data and Percentiles: 1879

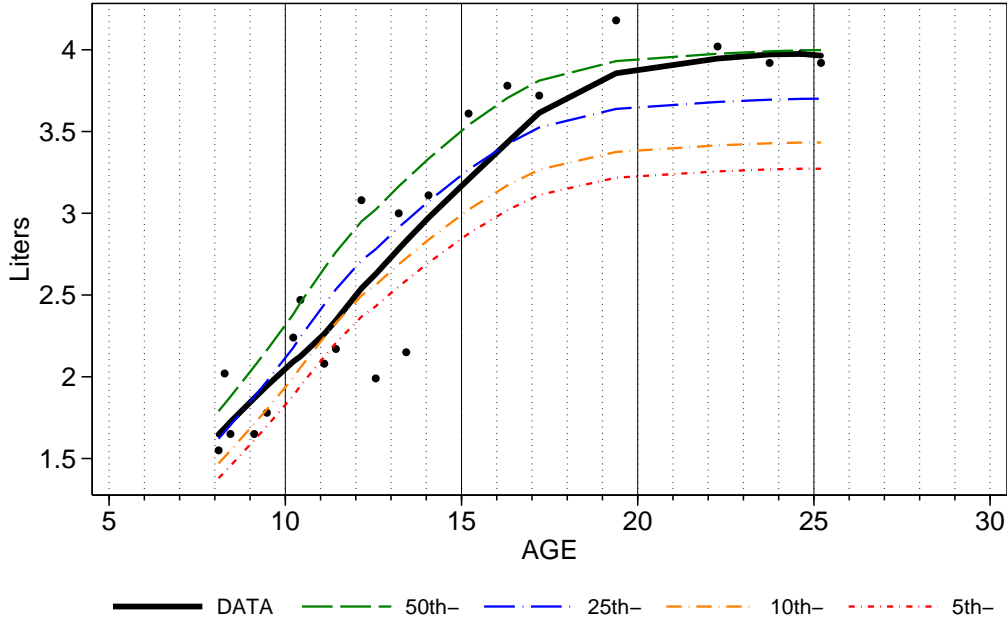

1879

**PATTERN OF GROWTH/DECLINE (Check One)**

- ( 1) Normal Growth
- ( 2) Normal Growth, Early Decline
- ( 3) Reduced Growth
- ( 4) Reduced Growth, Early Decline
- ( 9) Undetermined Pattern
- ( 8) Undetermined - not enough data

Maximum lung growth attained: ( 1) Yes ( 0) No

Plateau started: ( 2) No plateau ( 1) Yes ( 0) No

Decline started: ( 1) Yes ( 0) No

AGE AT each of the following periods (use '99' if N/A):

Maximum Lung Growth: \_\_\_\_ . \_\_\_\_

Start of Plateau: \_\_\_\_ . \_\_\_\_

Start of Decline: \_\_\_\_ . \_\_\_\_

### Pre-BD FEV1 Data and Percentiles: 1880

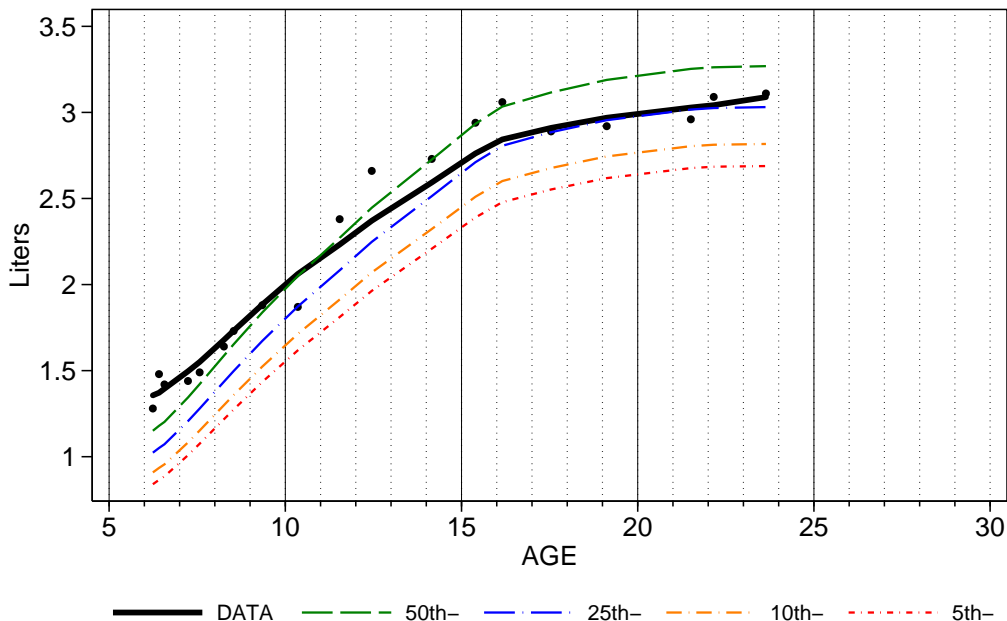

1880

**PATTERN OF GROWTH/DECLINE (Check One)**

- ( 1 ) Normal Growth
- ( 2 ) Normal Growth, Early Decline
- ( 3 ) Reduced Growth
- ( 4 ) Reduced Growth, Early Decline
- ( 9 ) Undetermined Pattern
- ( 8 ) Undetermined - not enough data

Maximum lung growth attained: ( 1 ) Yes ( 0 ) No

Plateau started: ( 2 ) No plateau ( 1 ) Yes ( 0 ) No

Decline started: ( 1 ) Yes ( 0 ) No

AGE AT each of the following periods (use '99' if N/A):

Maximum Lung Growth: \_\_\_\_ . \_\_\_\_

Start of Plateau: \_\_\_\_ . \_\_\_\_

Start of Decline: \_\_\_\_ . \_\_\_\_



### Pre-BD FEV1 Data and Percentiles: 1881

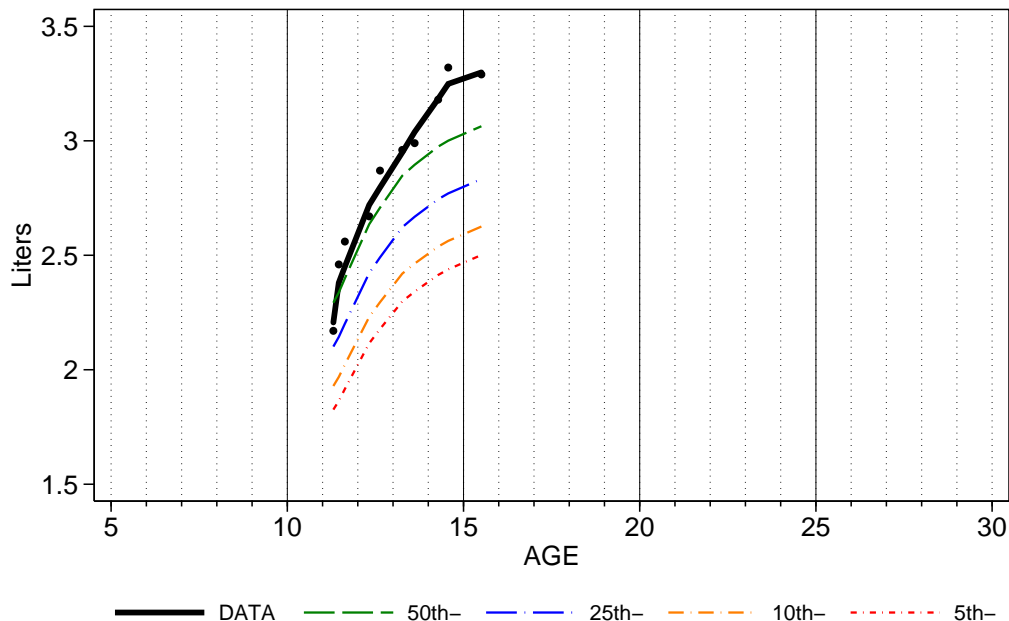

1881

**PATTERN OF GROWTH/DECLINE (Check One)**

- ( 1) Normal Growth
- ( 2) Normal Growth, Early Decline
- ( 3) Reduced Growth
- ( 4) Reduced Growth, Early Decline
- ( 9) Undetermined Pattern
- ( 8) Undetermined - not enough data

Maximum lung growth attained: ( 1) Yes ( 0) No

Plateau started: ( 2) No plateau ( 1) Yes ( 0) No

Decline started: ( 1) Yes ( 0) No

AGE AT each of the following periods (use '99' if N/A):

Maximum Lung Growth: \_\_\_\_ . \_\_\_\_

Start of Plateau: \_\_\_\_ . \_\_\_\_

Start of Decline: \_\_\_\_ . \_\_\_\_

### Pre-BD FEV1 Data and Percentiles: 1887

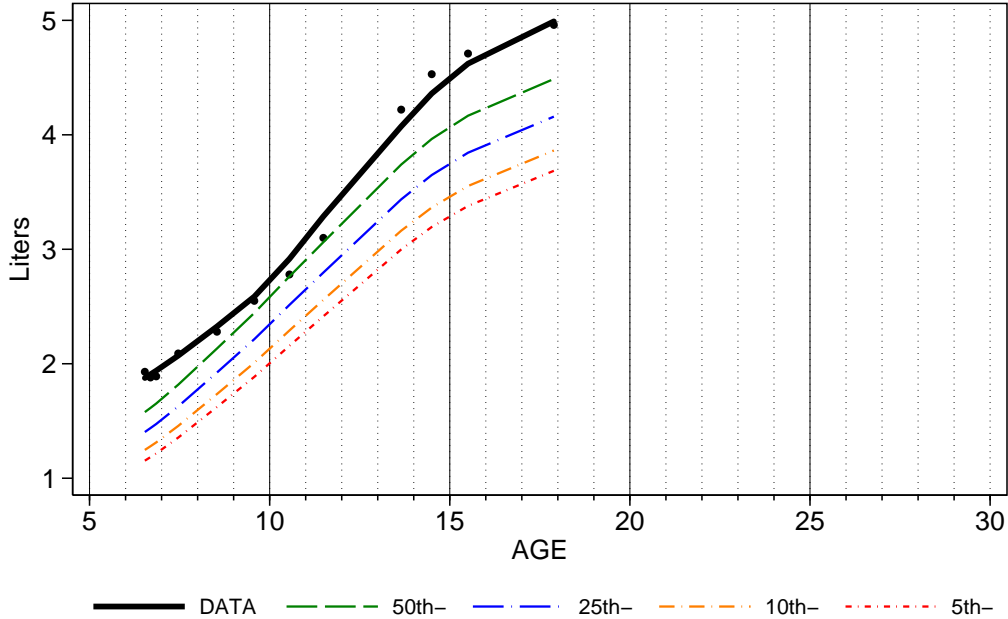

1887

**PATTERN OF GROWTH/DECLINE (Check One)**

- ( 1 ) Normal Growth
- ( 2 ) Normal Growth, Early Decline
- ( 3 ) Reduced Growth
- ( 4 ) Reduced Growth, Early Decline
- ( 9 ) Undetermined Pattern
- ( 8 ) Undetermined - not enough data

Maximum lung growth attained: ( 1 ) Yes ( 0 ) No

Plateau started: ( 2 ) No plateau ( 1 ) Yes ( 0 ) No

Decline started: ( 1 ) Yes ( 0 ) No

AGE AT each of the following periods (use '99' if N/A):

Maximum Lung Growth: \_\_\_\_ . \_\_\_\_

Start of Plateau: \_\_\_\_ . \_\_\_\_

Start of Decline: \_\_\_\_ . \_\_\_\_

### Pre-BD FEV1 Data and Percentiles: 1894

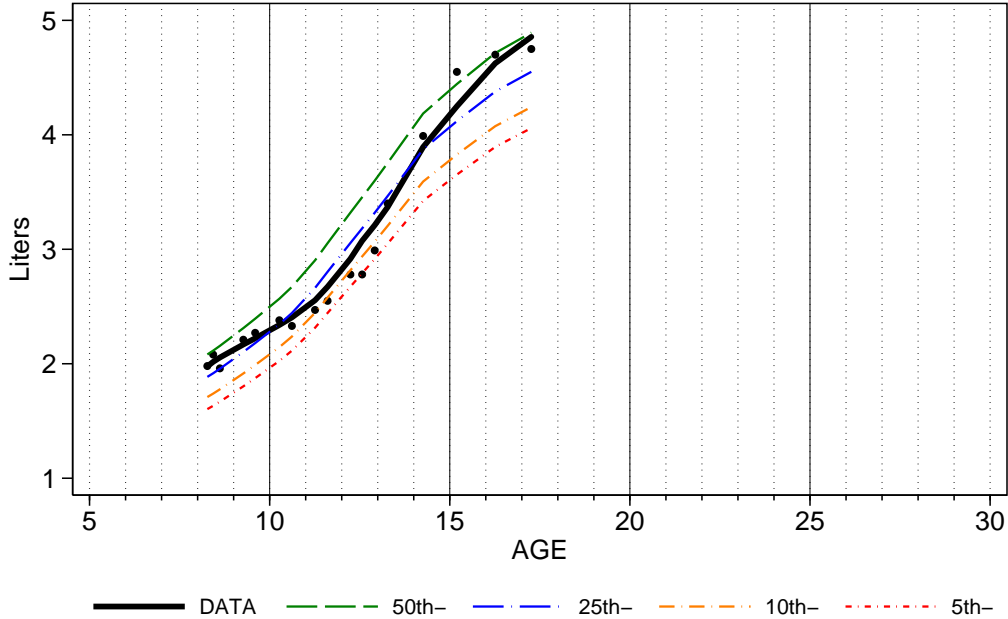

1894

**PATTERN OF GROWTH/DECLINE (Check One)**

- ( 1) Normal Growth
- ( 2) Normal Growth, Early Decline
- ( 3) Reduced Growth
- ( 4) Reduced Growth, Early Decline
- ( 9) Undetermined Pattern
- ( 8) Undetermined - not enough data

Maximum lung growth attained: ( 1) Yes ( 0) No

Plateau started: ( 2) No plateau ( 1) Yes ( 0) No

Decline started: ( 1) Yes ( 0) No

AGE AT each of the following periods (use '99' if N/A):

Maximum Lung Growth: \_\_\_\_ . \_\_\_\_

Start of Plateau: \_\_\_\_ . \_\_\_\_

Start of Decline: \_\_\_\_ . \_\_\_\_

### Pre-BD FEV1 Data and Percentiles: 1895

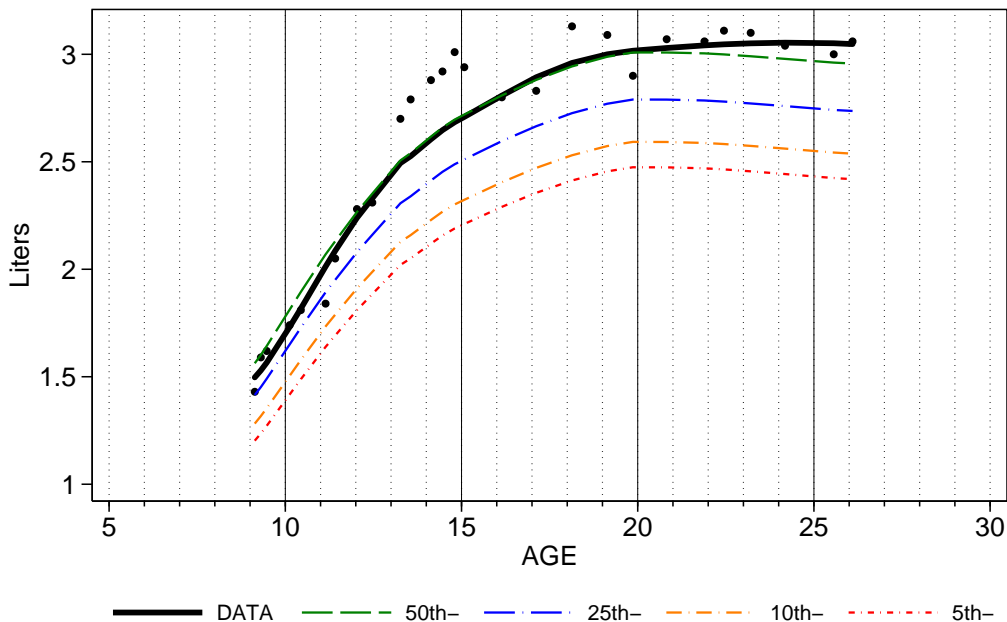

1895

**PATTERN OF GROWTH/DECLINE (Check One)**

- ( 1) Normal Growth
- ( 2) Normal Growth, Early Decline
- ( 3) Reduced Growth
- ( 4) Reduced Growth, Early Decline
- ( 9) Undetermined Pattern
- ( 8) Undetermined - not enough data

Maximum lung growth attained: ( 1) Yes ( 0) No

Plateau started: ( 2) No plateau ( 1) Yes ( 0) No

Decline started: ( 1) Yes ( 0) No

AGE AT each of the following periods (use '99' if N/A):

Maximum Lung Growth: \_\_\_\_ . \_\_\_\_

Start of Plateau: \_\_\_\_ . \_\_\_\_

Start of Decline: \_\_\_\_ . \_\_\_\_

### Pre-BD FEV1 Data and Percentiles: 1897

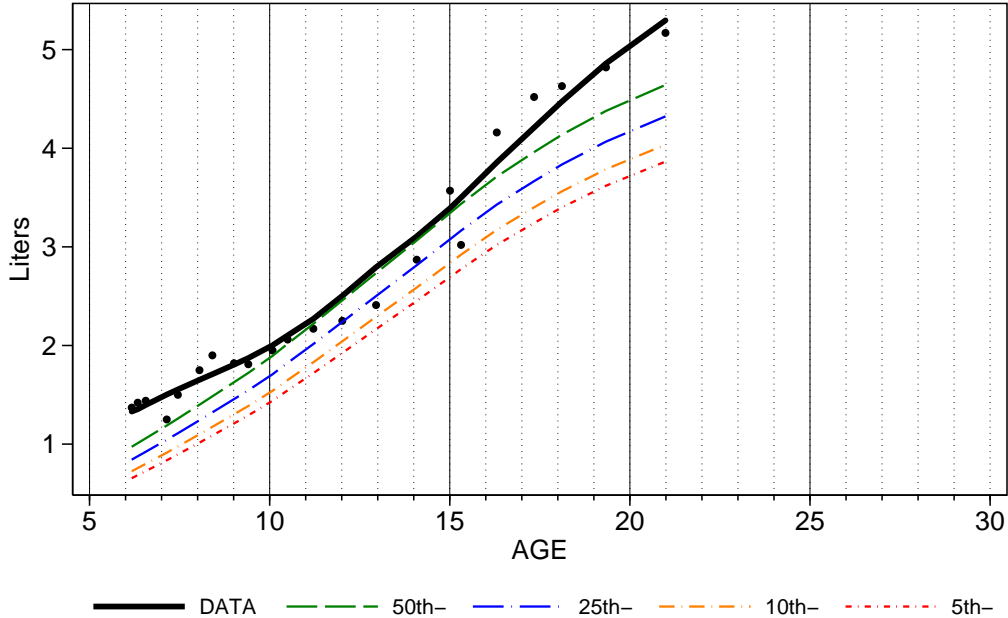

1897

**PATTERN OF GROWTH/DECLINE (Check One)**

- ( 1) Normal Growth
- ( 2) Normal Growth, Early Decline
- ( 3) Reduced Growth
- ( 4) Reduced Growth, Early Decline
- ( 9) Undetermined Pattern
- ( 8) Undetermined - not enough data

Maximum lung growth attained: ( 1) Yes ( 0) No

Plateau started: ( 2) No plateau ( 1) Yes ( 0) No

Decline started: ( 1) Yes ( 0) No

AGE AT each of the following periods (use '99' if N/A):

Maximum Lung Growth: \_\_\_\_ . \_\_\_\_

Start of Plateau: \_\_\_\_ . \_\_\_\_

Start of Decline: \_\_\_\_ . \_\_\_\_

### Pre-BD FEV1 Data and Percentiles: 1898

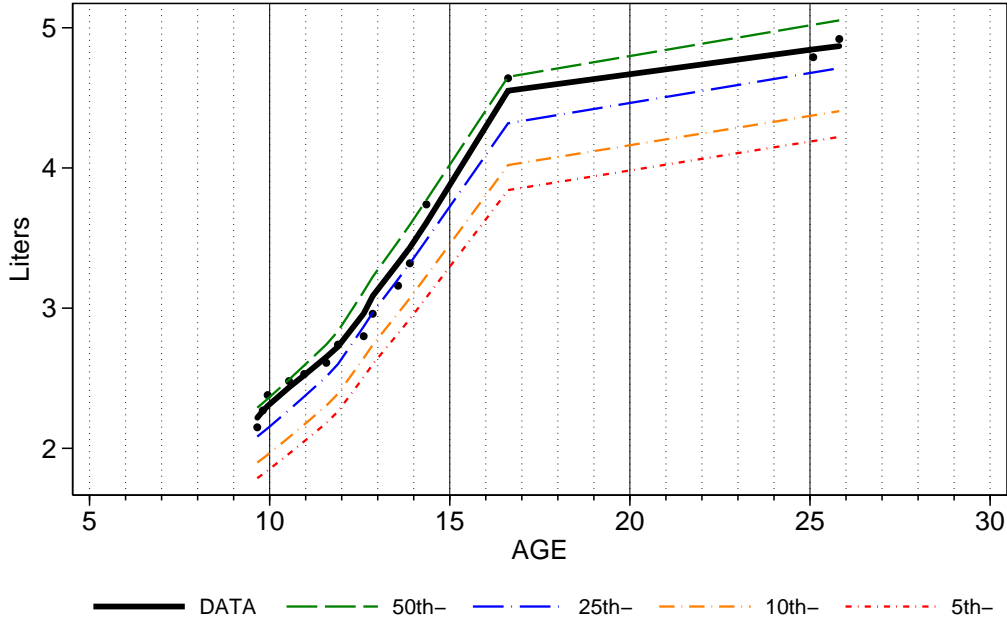

1898

**PATTERN OF GROWTH/DECLINE (Check One)**

- ( 1) Normal Growth
- ( 2) Normal Growth, Early Decline
- ( 3) Reduced Growth
- ( 4) Reduced Growth, Early Decline
- ( 9) Undetermined Pattern
- ( 8) Undetermined - not enough data

Maximum lung growth attained: ( 1) Yes ( 0) No

Plateau started: ( 2) No plateau ( 1) Yes ( 0) No

Decline started: ( 1) Yes ( 0) No

AGE AT each of the following periods (use '99' if N/A):

Maximum Lung Growth: \_\_\_\_ . \_\_\_\_

Start of Plateau: \_\_\_\_ . \_\_\_\_

Start of Decline: \_\_\_\_ . \_\_\_\_

### Pre-BD FEV1 Data and Percentiles: 1904

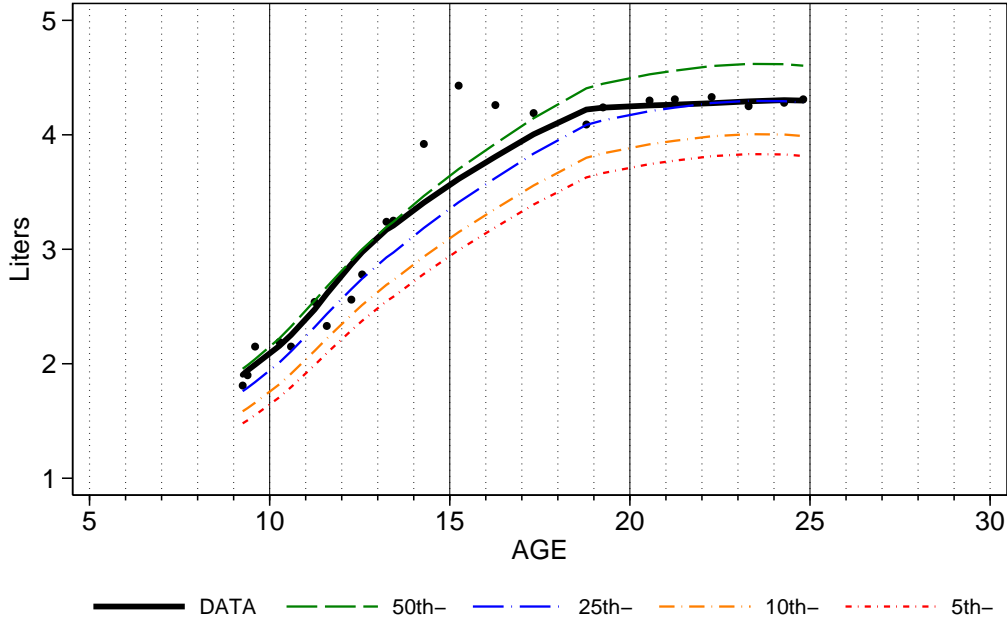

1904

**PATTERN OF GROWTH/DECLINE (Check One)**

- ( 1 ) Normal Growth
- ( 2 ) Normal Growth, Early Decline
- ( 3 ) Reduced Growth
- ( 4 ) Reduced Growth, Early Decline
- ( 9 ) Undetermined Pattern
- ( 8 ) Undetermined - not enough data

Maximum lung growth attained: ( 1 ) Yes ( 0 ) No

Plateau started: ( 2 ) No plateau ( 1 ) Yes ( 0 ) No

Decline started: ( 1 ) Yes ( 0 ) No

AGE AT each of the following periods (use '99' if N/A):

Maximum Lung Growth: \_\_\_\_ . \_\_\_\_

Start of Plateau: \_\_\_\_ . \_\_\_\_

Start of Decline: \_\_\_\_ . \_\_\_\_

### Pre-BD FEV1 Data and Percentiles: 1906

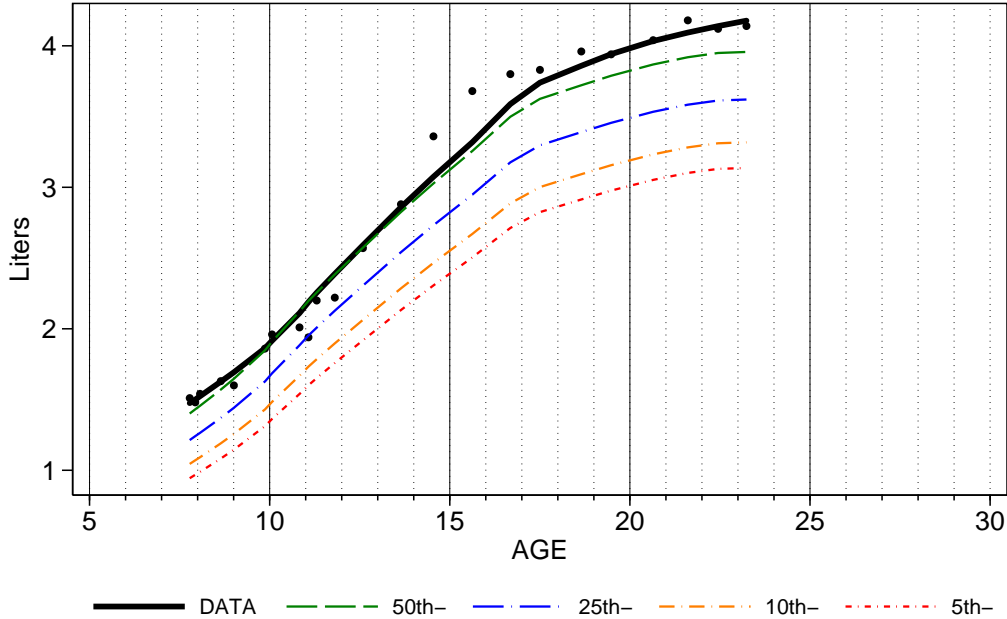

1906

**PATTERN OF GROWTH/DECLINE (Check One)**

- ( 1 ) Normal Growth
- ( 2 ) Normal Growth, Early Decline
- ( 3 ) Reduced Growth
- ( 4 ) Reduced Growth, Early Decline
- ( 9 ) Undetermined Pattern
- ( 8 ) Undetermined - not enough data

Maximum lung growth attained: ( 1 ) Yes ( 0 ) No

Plateau started: ( 2 ) No plateau ( 1 ) Yes ( 0 ) No

Decline started: ( 1 ) Yes ( 0 ) No

AGE AT each of the following periods (use '99' if N/A):

Maximum Lung Growth: \_\_\_\_ . \_\_\_\_

Start of Plateau: \_\_\_\_ . \_\_\_\_

Start of Decline: \_\_\_\_ . \_\_\_\_



### Pre-BD FEV1 Data and Percentiles: 1913

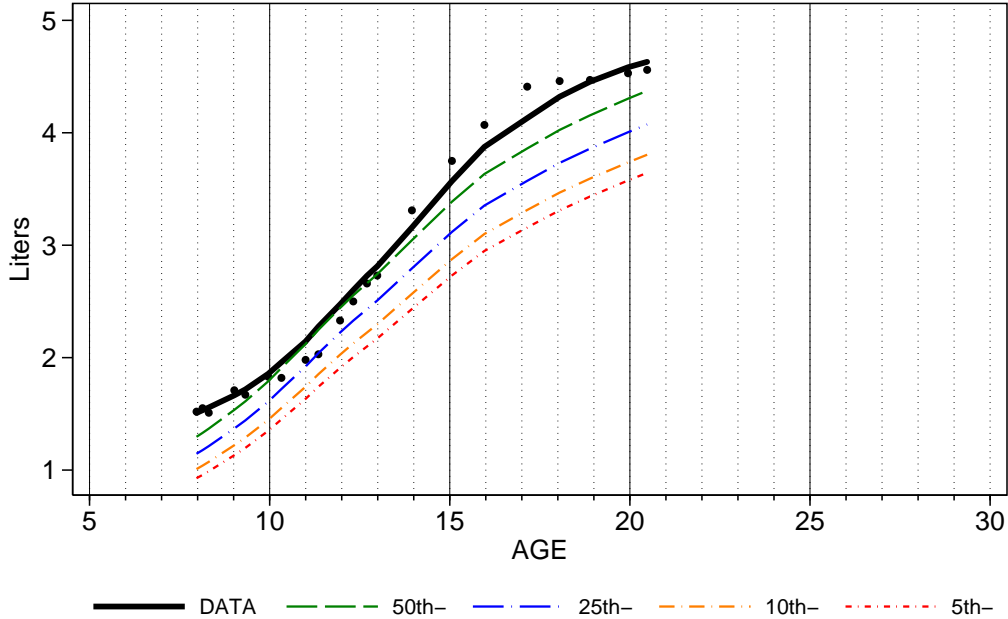

1913

**PATTERN OF GROWTH/DECLINE (Check One)**

- ( 1) Normal Growth
- ( 2) Normal Growth, Early Decline
- ( 3) Reduced Growth
- ( 4) Reduced Growth, Early Decline
- ( 9) Undetermined Pattern
- ( 8) Undetermined - not enough data

Maximum lung growth attained: ( 1) Yes ( 0) No

Plateau started: ( 2) No plateau ( 1) Yes ( 0) No

Decline started: ( 1) Yes ( 0) No

AGE AT each of the following periods (use '99' if N/A):

Maximum Lung Growth: \_\_\_\_ . \_\_\_\_

Start of Plateau: \_\_\_\_ . \_\_\_\_

Start of Decline: \_\_\_\_ . \_\_\_\_

### Pre-BD FEV1 Data and Percentiles: 1924

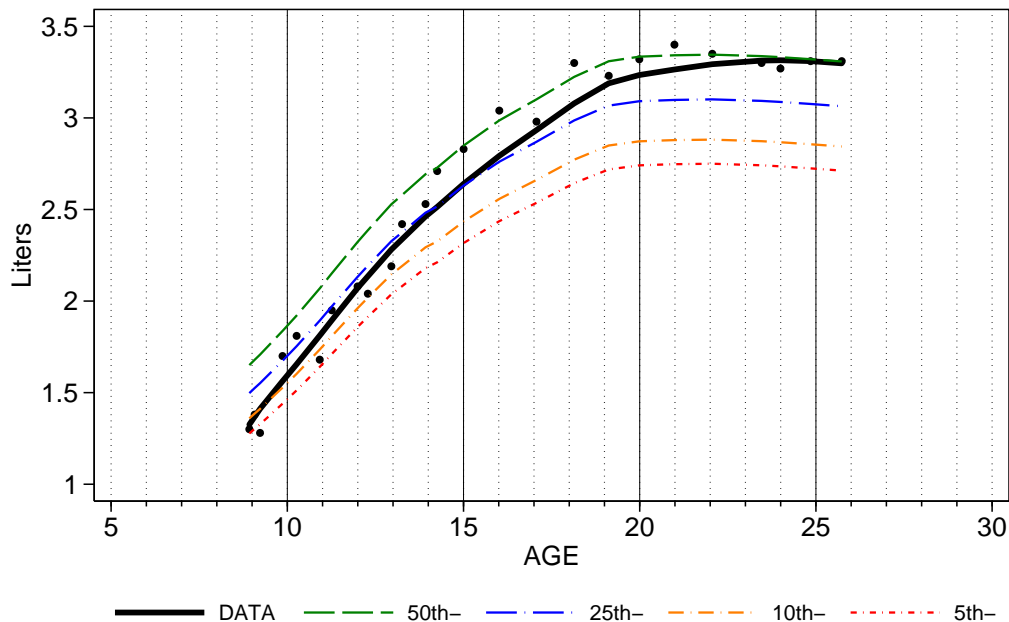

1924

**PATTERN OF GROWTH/DECLINE (Check One)**

- ( 1 ) Normal Growth
- ( 2 ) Normal Growth, Early Decline
- ( 3 ) Reduced Growth
- ( 4 ) Reduced Growth, Early Decline
- ( 9 ) Undetermined Pattern
- ( 8 ) Undetermined - not enough data

Maximum lung growth attained: ( 1 ) Yes ( 0 ) No

Plateau started: ( 2 ) No plateau ( 1 ) Yes ( 0 ) No

Decline started: ( 1 ) Yes ( 0 ) No

AGE AT each of the following periods (use '99' if N/A):

Maximum Lung Growth: \_\_\_\_ . \_\_\_\_

Start of Plateau: \_\_\_\_ . \_\_\_\_

Start of Decline: \_\_\_\_ . \_\_\_\_

### Pre-BD FEV1 Data and Percentiles: 1926

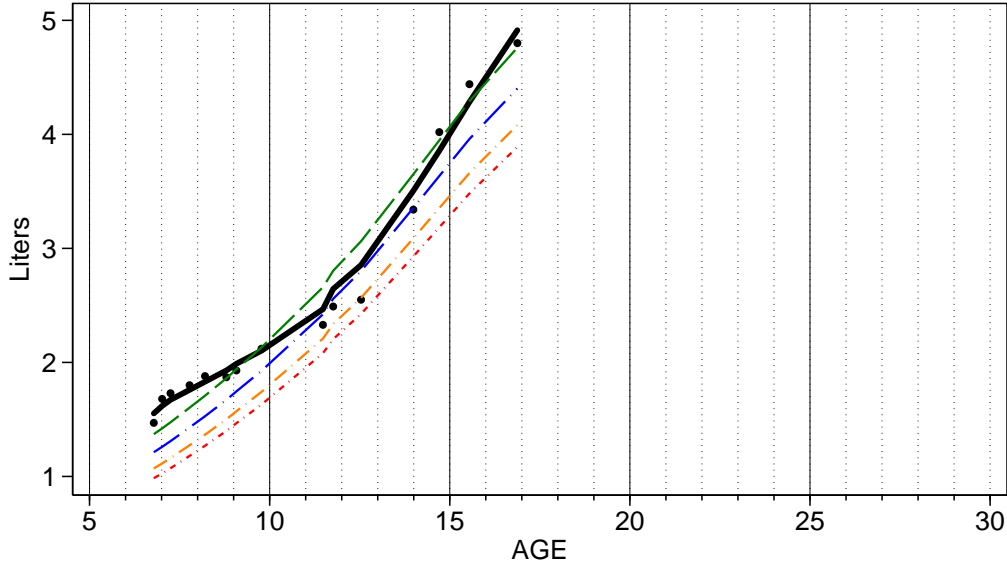

DATA  
  50th-  
  25th-  
  10th-  
  5th-

1926

**PATTERN OF GROWTH/DECLINE (Check One)**

- ( 1 ) Normal Growth
- ( 2 ) Normal Growth, Early Decline
- ( 3 ) Reduced Growth
- ( 4 ) Reduced Growth, Early Decline
- ( 9 ) Undetermined Pattern
- ( 8 ) Undetermined - not enough data

Maximum lung growth attained: ( 1 ) Yes ( 0 ) No

Plateau started: ( 2 ) No plateau ( 1 ) Yes ( 0 ) No

Decline started: ( 1 ) Yes ( 0 ) No

AGE AT each of the following periods (use '99' if N/A):

Maximum Lung Growth: \_\_\_\_ . \_\_\_\_

Start of Plateau: \_\_\_\_ . \_\_\_\_

Start of Decline: \_\_\_\_ . \_\_\_\_

### Pre-BD FEV1 Data and Percentiles: 1932

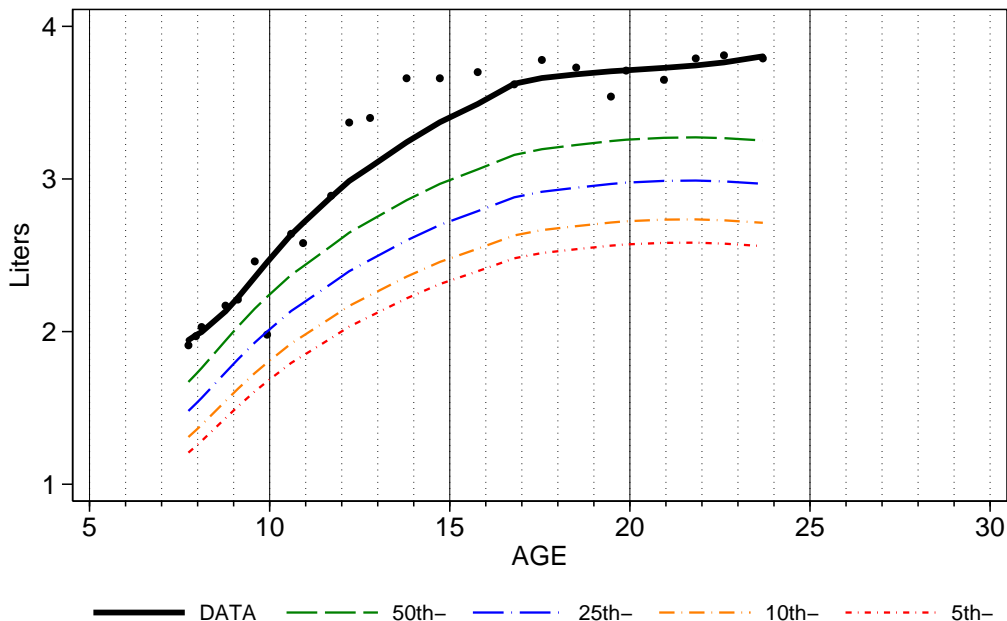

1932

**PATTERN OF GROWTH/DECLINE (Check One)**

- ( 1 ) Normal Growth
- ( 2 ) Normal Growth, Early Decline
- ( 3 ) Reduced Growth
- ( 4 ) Reduced Growth, Early Decline
- ( 9 ) Undetermined Pattern
- ( 8 ) Undetermined - not enough data

Maximum lung growth attained: ( 1 ) Yes ( 0 ) No

Plateau started: ( 2 ) No plateau ( 1 ) Yes ( 0 ) No

Decline started: ( 1 ) Yes ( 0 ) No

AGE AT each of the following periods (use '99' if N/A):

Maximum Lung Growth: \_\_\_\_ . \_\_\_\_

Start of Plateau: \_\_\_\_ . \_\_\_\_

Start of Decline: \_\_\_\_ . \_\_\_\_

### Pre-BD FEV1 Data and Percentiles: 1933

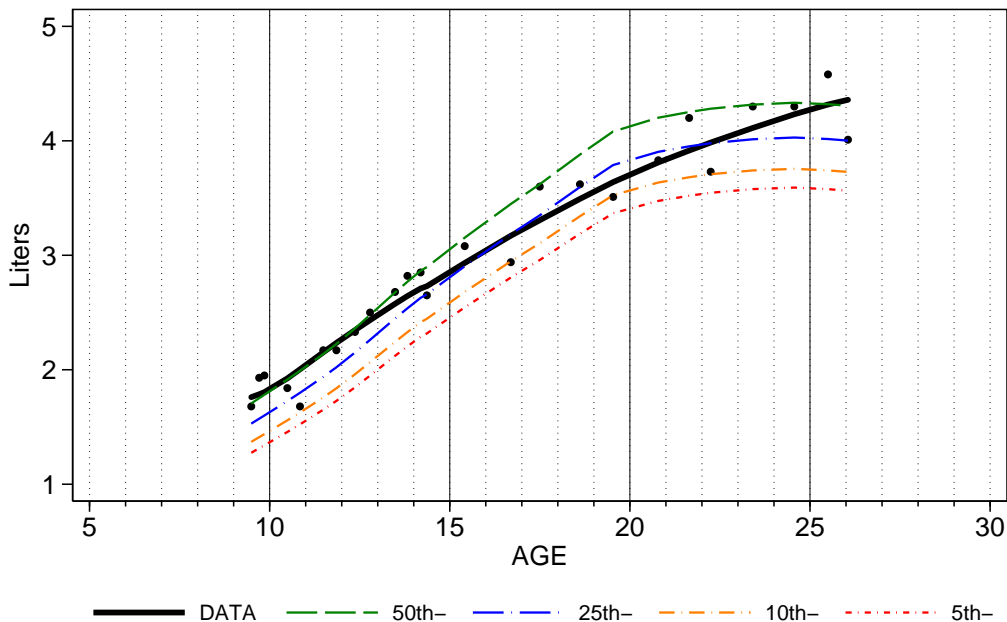

1933

**PATTERN OF GROWTH/DECLINE (Check One)**

- ( 1 ) Normal Growth
- ( 2 ) Normal Growth, Early Decline
- ( 3 ) Reduced Growth
- ( 4 ) Reduced Growth, Early Decline
- ( 9 ) Undetermined Pattern
- ( 8 ) Undetermined - not enough data

Maximum lung growth attained: ( 1 ) Yes ( 0 ) No

Plateau started: ( 2 ) No plateau ( 1 ) Yes ( 0 ) No

Decline started: ( 1 ) Yes ( 0 ) No

AGE AT each of the following periods (use '99' if N/A):

Maximum Lung Growth: \_\_\_\_ . \_\_\_\_

Start of Plateau: \_\_\_\_ . \_\_\_\_

Start of Decline: \_\_\_\_ . \_\_\_\_

### Pre-BD FEV1 Data and Percentiles: 1937

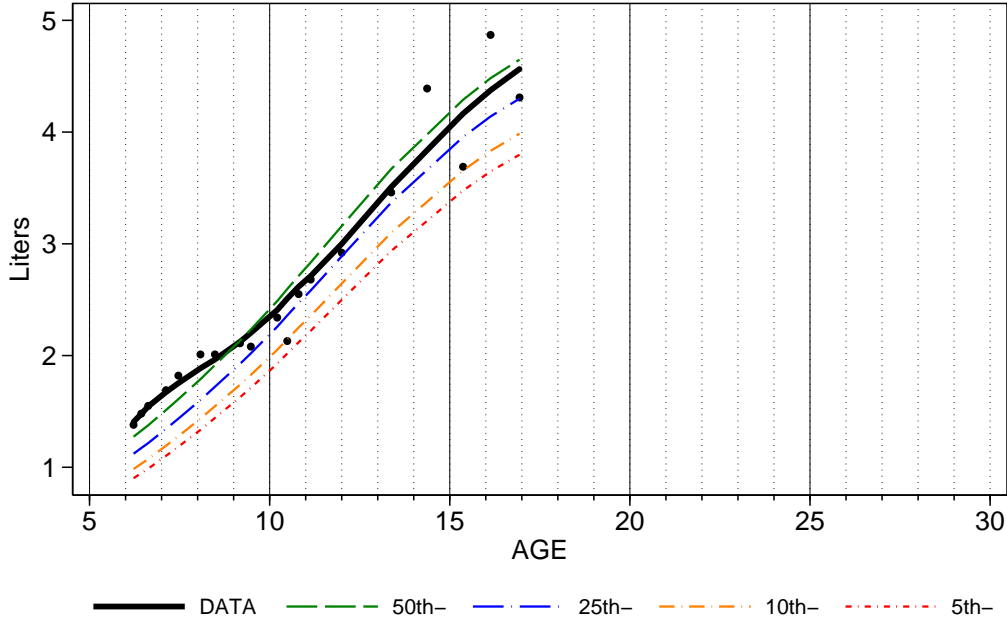

1937

**PATTERN OF GROWTH/DECLINE (Check One)**

- ( 1) Normal Growth
- ( 2) Normal Growth, Early Decline
- ( 3) Reduced Growth
- ( 4) Reduced Growth, Early Decline
- ( 9) Undetermined Pattern
- ( 8) Undetermined - not enough data

Maximum lung growth attained: ( 1) Yes ( 0) No

Plateau started: ( 2) No plateau ( 1) Yes ( 0) No

Decline started: ( 1) Yes ( 0) No

AGE AT each of the following periods (use '99' if N/A):

Maximum Lung Growth: \_\_\_\_ . \_\_\_\_

Start of Plateau: \_\_\_\_ . \_\_\_\_

Start of Decline: \_\_\_\_ . \_\_\_\_

### Pre-BD FEV1 Data and Percentiles: 1938

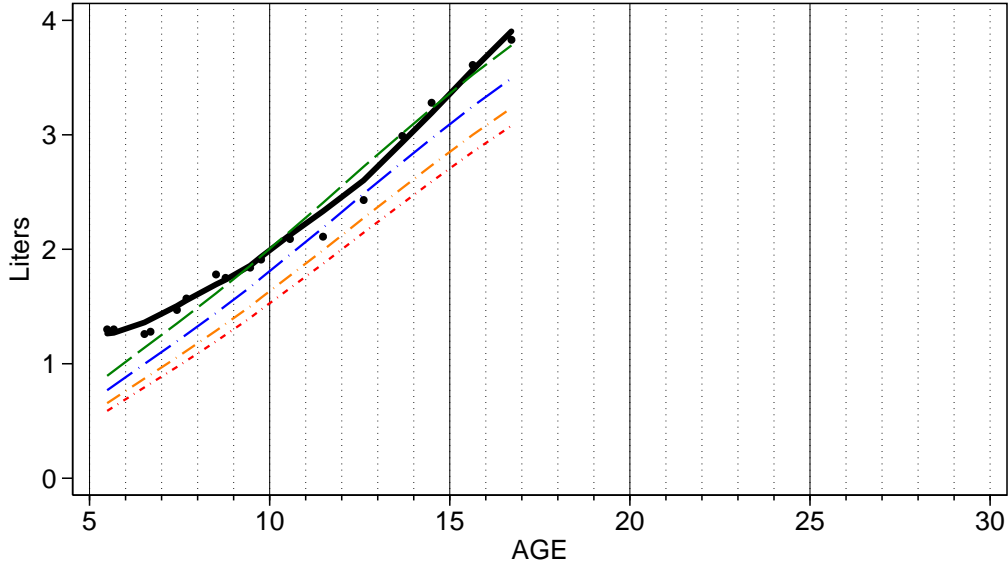

DATA  
  50th-  
  25th-  
  10th-  
  5th-

1938

**PATTERN OF GROWTH/DECLINE (Check One)**

- ( 1 ) Normal Growth
- ( 2 ) Normal Growth, Early Decline
- ( 3 ) Reduced Growth
- ( 4 ) Reduced Growth, Early Decline
- ( 9 ) Undetermined Pattern
- ( 8 ) Undetermined - not enough data

Maximum lung growth attained: ( 1 ) Yes ( 0 ) No

Plateau started: ( 2 ) No plateau ( 1 ) Yes ( 0 ) No

Decline started: ( 1 ) Yes ( 0 ) No

AGE AT each of the following periods (use '99' if N/A):

Maximum Lung Growth: \_\_\_\_ . \_\_\_\_

Start of Plateau: \_\_\_\_ . \_\_\_\_

Start of Decline: \_\_\_\_ . \_\_\_\_

### Pre-BD FEV1 Data and Percentiles: 1943

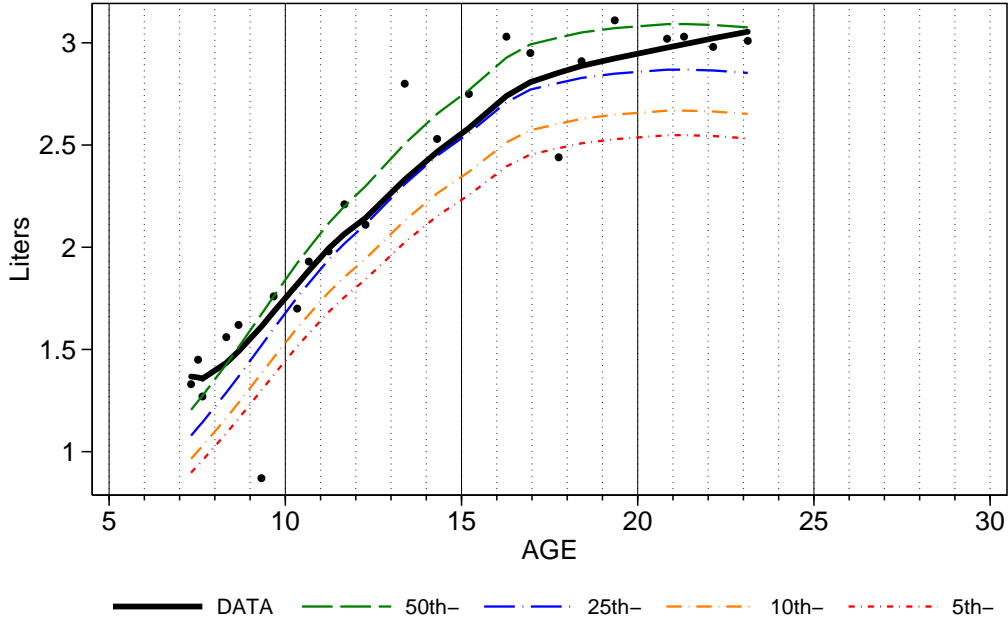

1943

**PATTERN OF GROWTH/DECLINE (Check One)**

- ( 1 ) Normal Growth
- ( 2 ) Normal Growth, Early Decline
- ( 3 ) Reduced Growth
- ( 4 ) Reduced Growth, Early Decline
- ( 9 ) Undetermined Pattern
- ( 8 ) Undetermined - not enough data

Maximum lung growth attained: ( 1 ) Yes ( 0 ) No

Plateau started: ( 2 ) No plateau ( 1 ) Yes ( 0 ) No

Decline started: ( 1 ) Yes ( 0 ) No

AGE AT each of the following periods (use '99' if N/A):

Maximum Lung Growth: \_\_\_\_ . \_\_\_\_

Start of Plateau: \_\_\_\_ . \_\_\_\_

Start of Decline: \_\_\_\_ . \_\_\_\_



### Pre-BD FEV1 Data and Percentiles: 1945

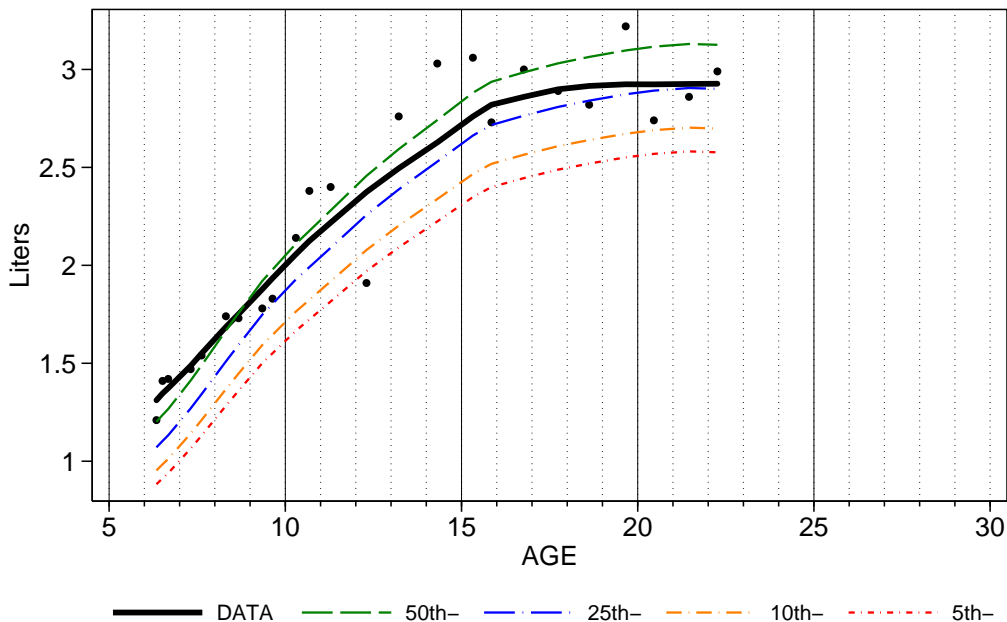

1945

**PATTERN OF GROWTH/DECLINE (Check One)**

- ( 1 ) Normal Growth
- ( 2 ) Normal Growth, Early Decline
- ( 3 ) Reduced Growth
- ( 4 ) Reduced Growth, Early Decline
- ( 9 ) Undetermined Pattern
- ( 8 ) Undetermined - not enough data

Maximum lung growth attained: ( 1 ) Yes ( 0 ) No

Plateau started: ( 2 ) No plateau ( 1 ) Yes ( 0 ) No

Decline started: ( 1 ) Yes ( 0 ) No

AGE AT each of the following periods (use '99' if N/A):

Maximum Lung Growth: \_\_\_\_ . \_\_\_\_

Start of Plateau: \_\_\_\_ . \_\_\_\_

Start of Decline: \_\_\_\_ . \_\_\_\_

### Pre-BD FEV1 Data and Percentiles: 1946

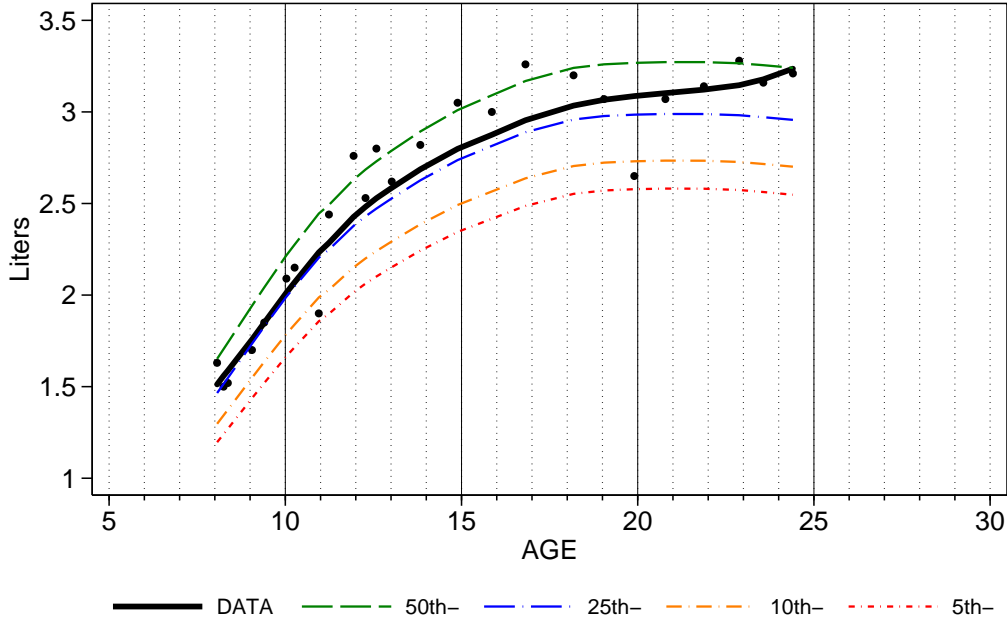

1946

**PATTERN OF GROWTH/DECLINE (Check One)**

- ( 1 ) Normal Growth
- ( 2 ) Normal Growth, Early Decline
- ( 3 ) Reduced Growth
- ( 4 ) Reduced Growth, Early Decline
- ( 9 ) Undetermined Pattern
- ( 8 ) Undetermined - not enough data

Maximum lung growth attained: ( 1 ) Yes ( 0 ) No

Plateau started: ( 2 ) No plateau ( 1 ) Yes ( 0 ) No

Decline started: ( 1 ) Yes ( 0 ) No

AGE AT each of the following periods (use '99' if N/A):

Maximum Lung Growth: \_\_\_\_ . \_\_\_\_

Start of Plateau: \_\_\_\_ . \_\_\_\_

Start of Decline: \_\_\_\_ . \_\_\_\_

### Pre-BD FEV1 Data and Percentiles: 1950

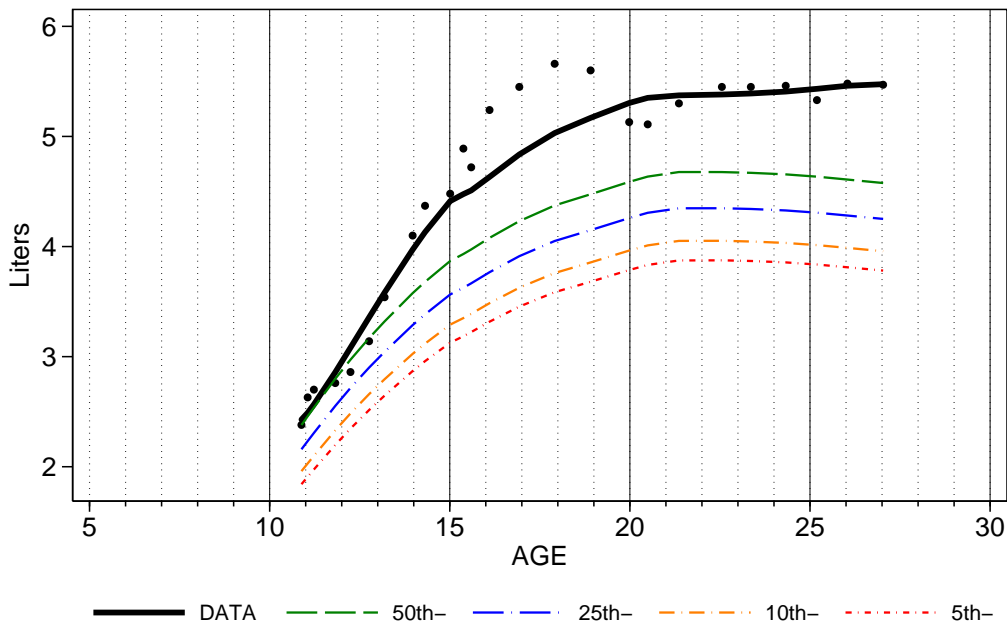

1950

**PATTERN OF GROWTH/DECLINE (Check One)**

- ( 1 ) Normal Growth
- ( 2 ) Normal Growth, Early Decline
- ( 3 ) Reduced Growth
- ( 4 ) Reduced Growth, Early Decline
- ( 9 ) Undetermined Pattern
- ( 8 ) Undetermined - not enough data

Maximum lung growth attained: ( 1 ) Yes ( 0 ) No

Plateau started: ( 2 ) No plateau ( 1 ) Yes ( 0 ) No

Decline started: ( 1 ) Yes ( 0 ) No

AGE AT each of the following periods (use '99' if N/A):

Maximum Lung Growth: \_\_\_\_ . \_\_\_\_

Start of Plateau: \_\_\_\_ . \_\_\_\_

Start of Decline: \_\_\_\_ . \_\_\_\_

### Pre-BD FEV1 Data and Percentiles: 1951

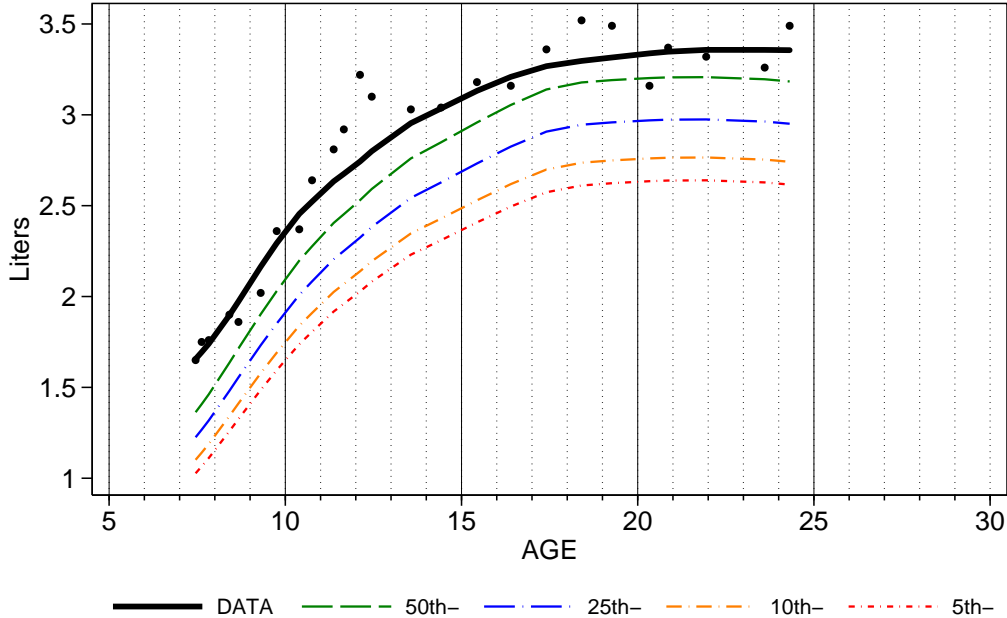

1951

**PATTERN OF GROWTH/DECLINE (Check One)**

- ( 1) Normal Growth
- ( 2) Normal Growth, Early Decline
- ( 3) Reduced Growth
- ( 4) Reduced Growth, Early Decline
- ( 9) Undetermined Pattern
- ( 8) Undetermined - not enough data

Maximum lung growth attained: ( 1) Yes ( 0) No

Plateau started: ( 2) No plateau ( 1) Yes ( 0) No

Decline started: ( 1) Yes ( 0) No

AGE AT each of the following periods (use '99' if N/A):

Maximum Lung Growth: \_\_\_\_ . \_\_\_\_

Start of Plateau: \_\_\_\_ . \_\_\_\_

Start of Decline: \_\_\_\_ . \_\_\_\_

### Pre-BD FEV1 Data and Percentiles: 1953

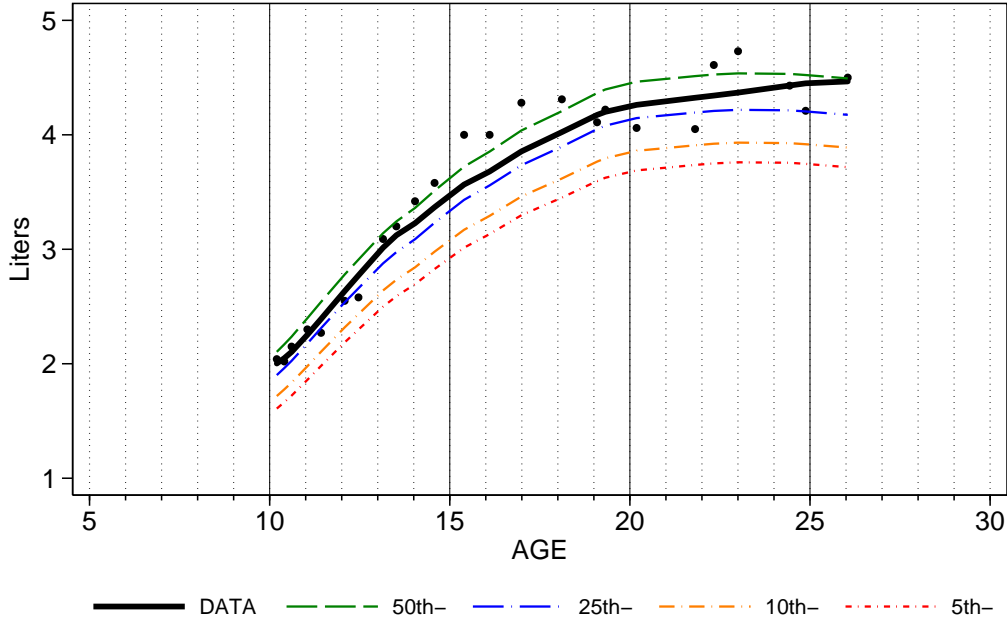

1953

**PATTERN OF GROWTH/DECLINE (Check One)**

- ( 1 ) Normal Growth
- ( 2 ) Normal Growth, Early Decline
- ( 3 ) Reduced Growth
- ( 4 ) Reduced Growth, Early Decline
- ( 9 ) Undetermined Pattern
- ( 8 ) Undetermined - not enough data

Maximum lung growth attained: ( 1 ) Yes ( 0 ) No

Plateau started: ( 2 ) No plateau ( 1 ) Yes ( 0 ) No

Decline started: ( 1 ) Yes ( 0 ) No

AGE AT each of the following periods (use '99' if N/A):

Maximum Lung Growth: \_\_\_\_ . \_\_\_\_

Start of Plateau: \_\_\_\_ . \_\_\_\_

Start of Decline: \_\_\_\_ . \_\_\_\_

### Pre-BD FEV1 Data and Percentiles: 1956

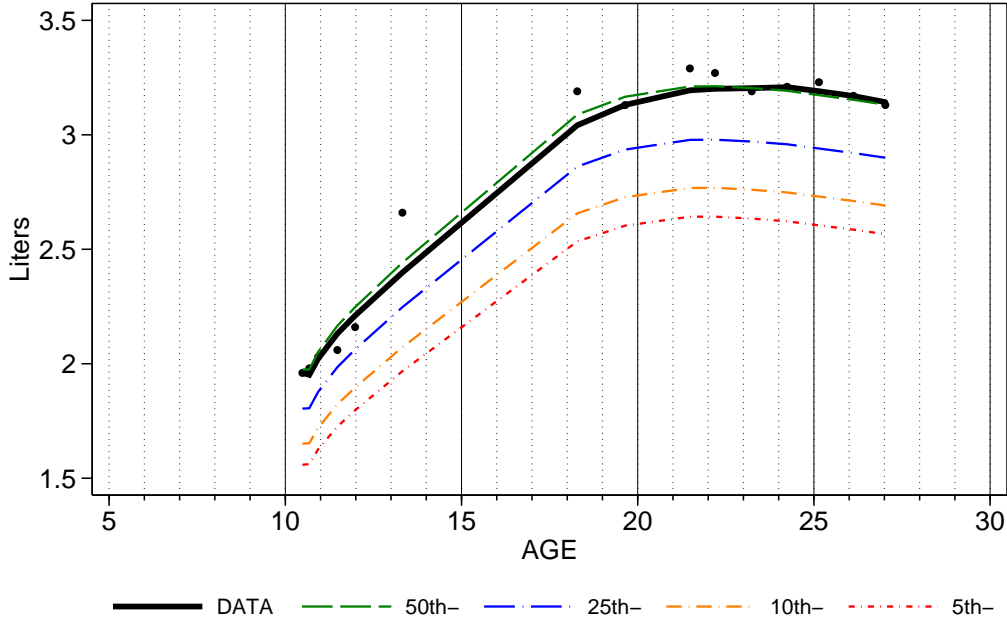

1956

**PATTERN OF GROWTH/DECLINE (Check One)**

- ( 1) Normal Growth
- ( 2) Normal Growth, Early Decline
- ( 3) Reduced Growth
- ( 4) Reduced Growth, Early Decline
- ( 9) Undetermined Pattern
- ( 8) Undetermined - not enough data

Maximum lung growth attained: ( 1) Yes ( 0) No

Plateau started: ( 2) No plateau ( 1) Yes ( 0) No

Decline started: ( 1) Yes ( 0) No

AGE AT each of the following periods (use '99' if N/A):

Maximum Lung Growth: \_\_\_\_ . \_\_\_\_

Start of Plateau: \_\_\_\_ . \_\_\_\_

Start of Decline: \_\_\_\_ . \_\_\_\_

### Pre-BD FEV1 Data and Percentiles: 1958

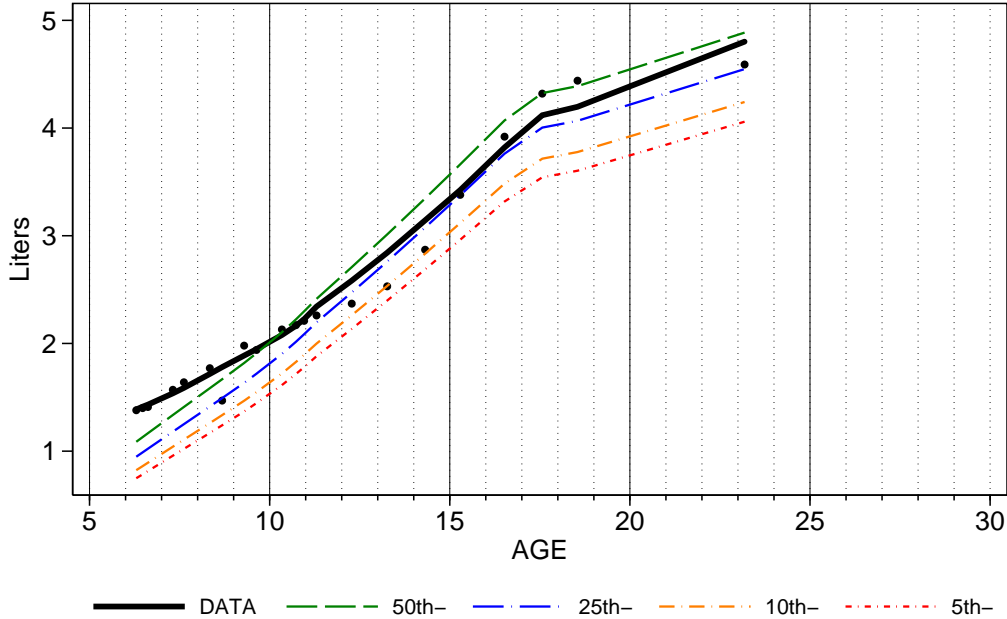

1958

**PATTERN OF GROWTH/DECLINE (Check One)**

- ( 1 ) Normal Growth
- ( 2 ) Normal Growth, Early Decline
- ( 3 ) Reduced Growth
- ( 4 ) Reduced Growth, Early Decline
- ( 9 ) Undetermined Pattern
- ( 8 ) Undetermined - not enough data

Maximum lung growth attained: ( 1 ) Yes ( 0 ) No

Plateau started: ( 2 ) No plateau ( 1 ) Yes ( 0 ) No

Decline started: ( 1 ) Yes ( 0 ) No

AGE AT each of the following periods (use '99' if N/A):

Maximum Lung Growth: \_\_\_\_ . \_\_\_\_

Start of Plateau: \_\_\_\_ . \_\_\_\_

Start of Decline: \_\_\_\_ . \_\_\_\_

### Pre-BD FEV1 Data and Percentiles: 1964

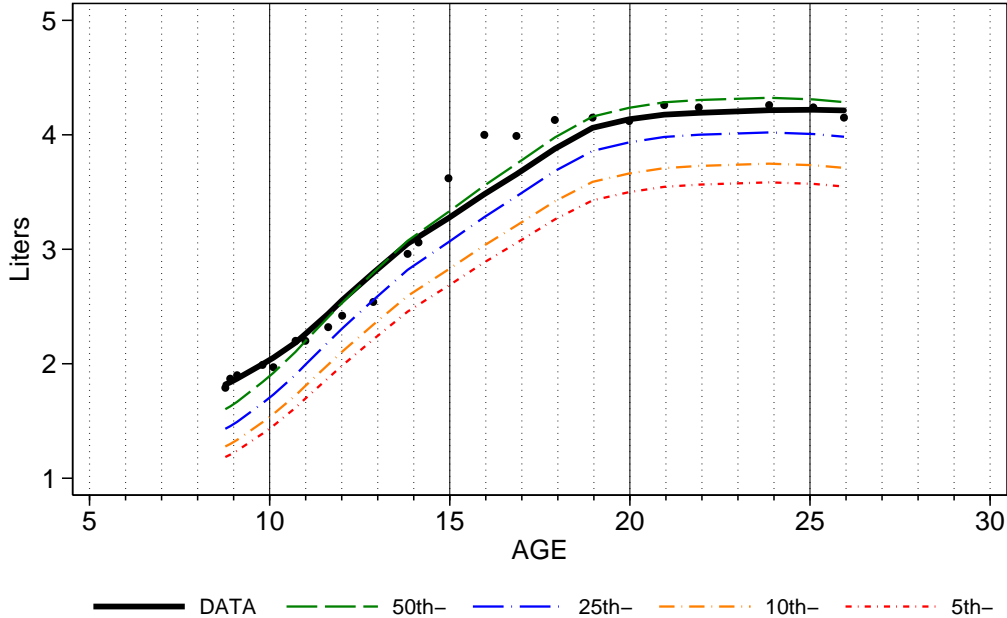

1964

**PATTERN OF GROWTH/DECLINE (Check One)**

- ( 1 ) Normal Growth
- ( 2 ) Normal Growth, Early Decline
- ( 3 ) Reduced Growth
- ( 4 ) Reduced Growth, Early Decline
- ( 9 ) Undetermined Pattern
- ( 8 ) Undetermined - not enough data

Maximum lung growth attained: ( 1 ) Yes ( 0 ) No

Plateau started: ( 2 ) No plateau ( 1 ) Yes ( 0 ) No

Decline started: ( 1 ) Yes ( 0 ) No

AGE AT each of the following periods (use '99' if N/A):

Maximum Lung Growth: \_\_\_\_ . \_\_\_\_

Start of Plateau: \_\_\_\_ . \_\_\_\_

Start of Decline: \_\_\_\_ . \_\_\_\_



### Pre-BD FEV1 Data and Percentiles: 1966

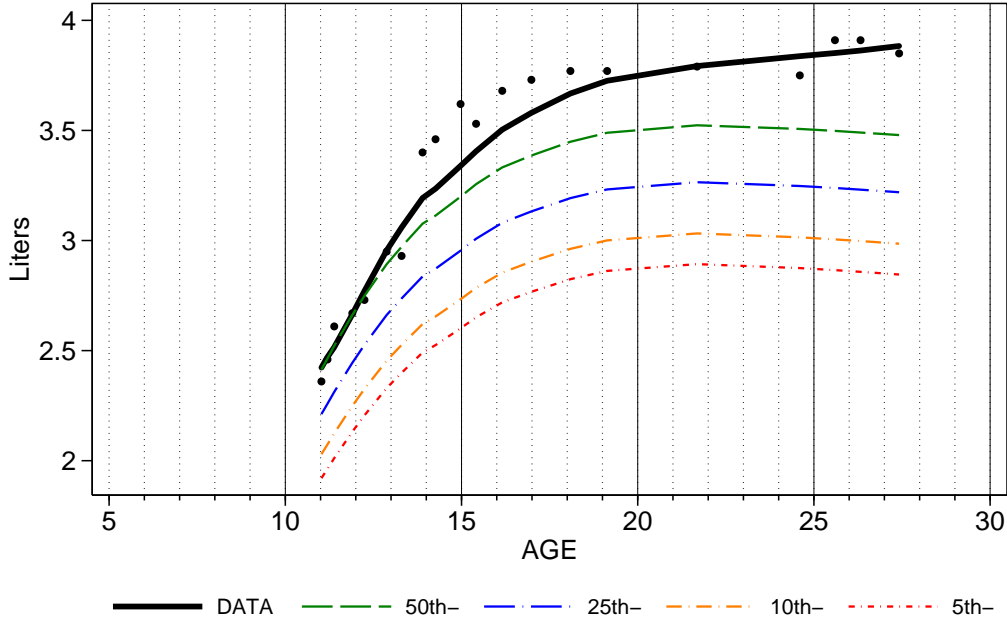

1966

**PATTERN OF GROWTH/DECLINE (Check One)**

- ( 1) Normal Growth
- ( 2) Normal Growth, Early Decline
- ( 3) Reduced Growth
- ( 4) Reduced Growth, Early Decline
- ( 9) Undetermined Pattern
- ( 8) Undetermined - not enough data

Maximum lung growth attained: ( 1) Yes ( 0) No

Plateau started: ( 2) No plateau ( 1) Yes ( 0) No

Decline started: ( 1) Yes ( 0) No

AGE AT each of the following periods (use '99' if N/A):

Maximum Lung Growth: \_\_\_\_ . \_\_\_\_

Start of Plateau: \_\_\_\_ . \_\_\_\_

Start of Decline: \_\_\_\_ . \_\_\_\_

### Pre-BD FEV1 Data and Percentiles: 1967

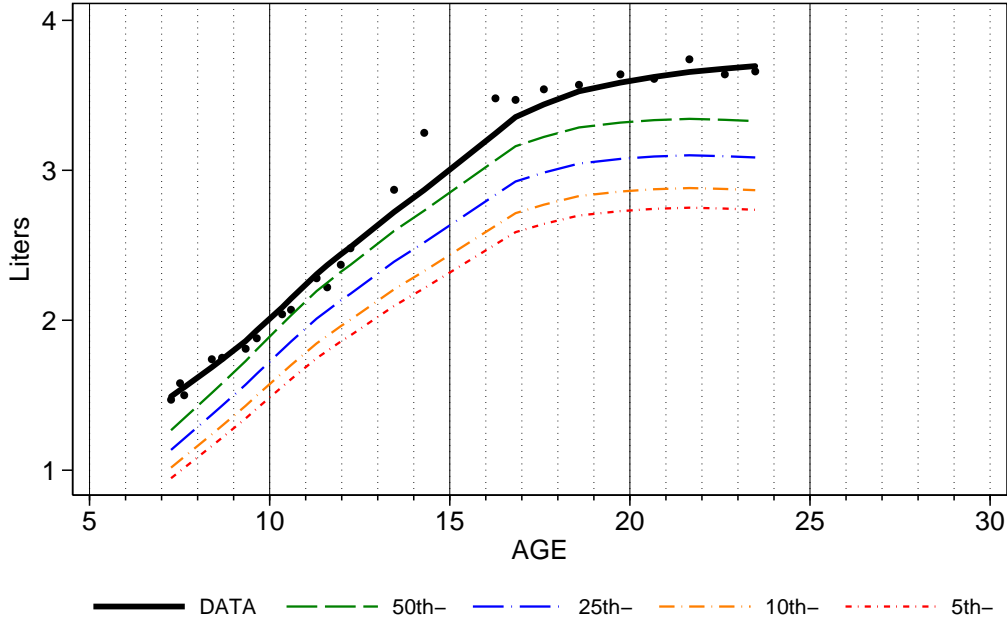

1967

**PATTERN OF GROWTH/DECLINE (Check One)**

- ( 1) Normal Growth
- ( 2) Normal Growth, Early Decline
- ( 3) Reduced Growth
- ( 4) Reduced Growth, Early Decline
- ( 9) Undetermined Pattern
- ( 8) Undetermined - not enough data

Maximum lung growth attained: ( 1) Yes ( 0) No

Plateau started: ( 2) No plateau ( 1) Yes ( 0) No

Decline started: ( 1) Yes ( 0) No

AGE AT each of the following periods (use '99' if N/A):

Maximum Lung Growth: \_\_\_\_ . \_\_\_\_

Start of Plateau: \_\_\_\_ . \_\_\_\_

Start of Decline: \_\_\_\_ . \_\_\_\_

### Pre-BD FEV1 Data and Percentiles: 1968

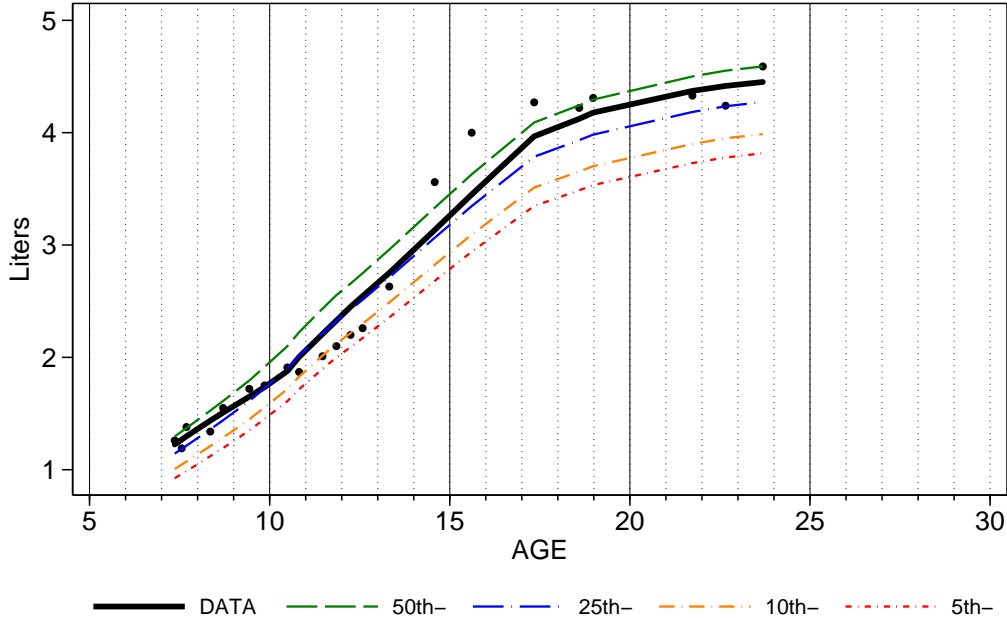

1968

**PATTERN OF GROWTH/DECLINE (Check One)**

- ( 1 ) Normal Growth
- ( 2 ) Normal Growth, Early Decline
- ( 3 ) Reduced Growth
- ( 4 ) Reduced Growth, Early Decline
- ( 9 ) Undetermined Pattern
- ( 8 ) Undetermined - not enough data

Maximum lung growth attained: ( 1 ) Yes ( 0 ) No

Plateau started: ( 2 ) No plateau ( 1 ) Yes ( 0 ) No

Decline started: ( 1 ) Yes ( 0 ) No

AGE AT each of the following periods (use '99' if N/A):

Maximum Lung Growth: \_\_\_\_ . \_\_\_\_

Start of Plateau: \_\_\_\_ . \_\_\_\_

Start of Decline: \_\_\_\_ . \_\_\_\_

### Pre-BD FEV1 Data and Percentiles: 1974

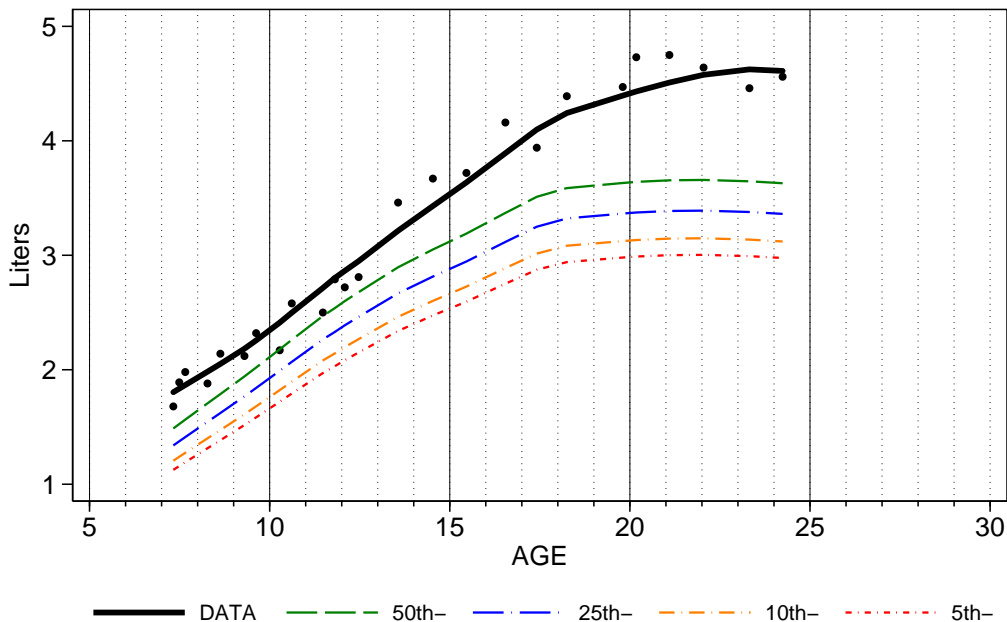

1974

**PATTERN OF GROWTH/DECLINE (Check One)**

- ( 1 ) Normal Growth
- ( 2 ) Normal Growth, Early Decline
- ( 3 ) Reduced Growth
- ( 4 ) Reduced Growth, Early Decline
- ( 9 ) Undetermined Pattern
- ( 8 ) Undetermined - not enough data

Maximum lung growth attained: ( 1 ) Yes ( 0 ) No

Plateau started: ( 2 ) No plateau ( 1 ) Yes ( 0 ) No

Decline started: ( 1 ) Yes ( 0 ) No

AGE AT each of the following periods (use '99' if N/A):

Maximum Lung Growth: \_\_\_\_ . \_\_\_\_

Start of Plateau: \_\_\_\_ . \_\_\_\_

Start of Decline: \_\_\_\_ . \_\_\_\_

### Pre-BD FEV1 Data and Percentiles: 1985

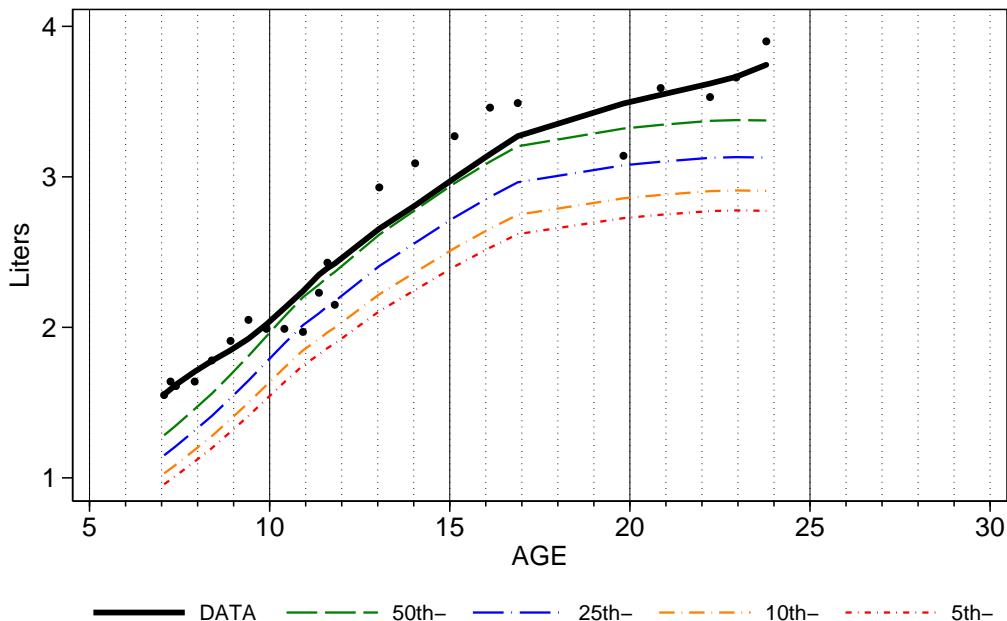

1985

**PATTERN OF GROWTH/DECLINE (Check One)**

- ( 1 ) Normal Growth
- ( 2 ) Normal Growth, Early Decline
- ( 3 ) Reduced Growth
- ( 4 ) Reduced Growth, Early Decline
- ( 9 ) Undetermined Pattern
- ( 8 ) Undetermined - not enough data

Maximum lung growth attained: ( 1 ) Yes ( 0 ) No

Plateau started: ( 2 ) No plateau ( 1 ) Yes ( 0 ) No

Decline started: ( 1 ) Yes ( 0 ) No

AGE AT each of the following periods (use '99' if N/A):

Maximum Lung Growth: \_\_\_\_ . \_\_\_\_

Start of Plateau: \_\_\_\_ . \_\_\_\_

Start of Decline: \_\_\_\_ . \_\_\_\_

### Pre-BD FEV1 Data and Percentiles: 1986

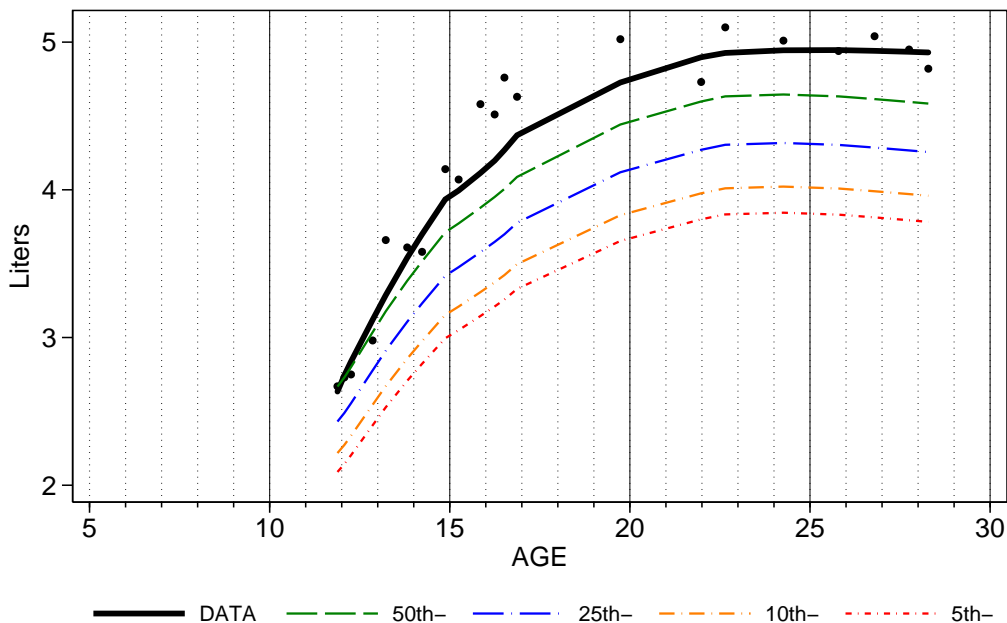

1986

**PATTERN OF GROWTH/DECLINE (Check One)**

- ( 1 ) Normal Growth
- ( 2 ) Normal Growth, Early Decline
- ( 3 ) Reduced Growth
- ( 4 ) Reduced Growth, Early Decline
- ( 9 ) Undetermined Pattern
- ( 8 ) Undetermined - not enough data

Maximum lung growth attained: ( 1 ) Yes ( 0 ) No

Plateau started: ( 2 ) No plateau ( 1 ) Yes ( 0 ) No

Decline started: ( 1 ) Yes ( 0 ) No

AGE AT each of the following periods (use '99' if N/A):

Maximum Lung Growth: \_\_\_\_ . \_\_\_\_

Start of Plateau: \_\_\_\_ . \_\_\_\_

Start of Decline: \_\_\_\_ . \_\_\_\_

### Pre-BD FEV1 Data and Percentiles: 1988

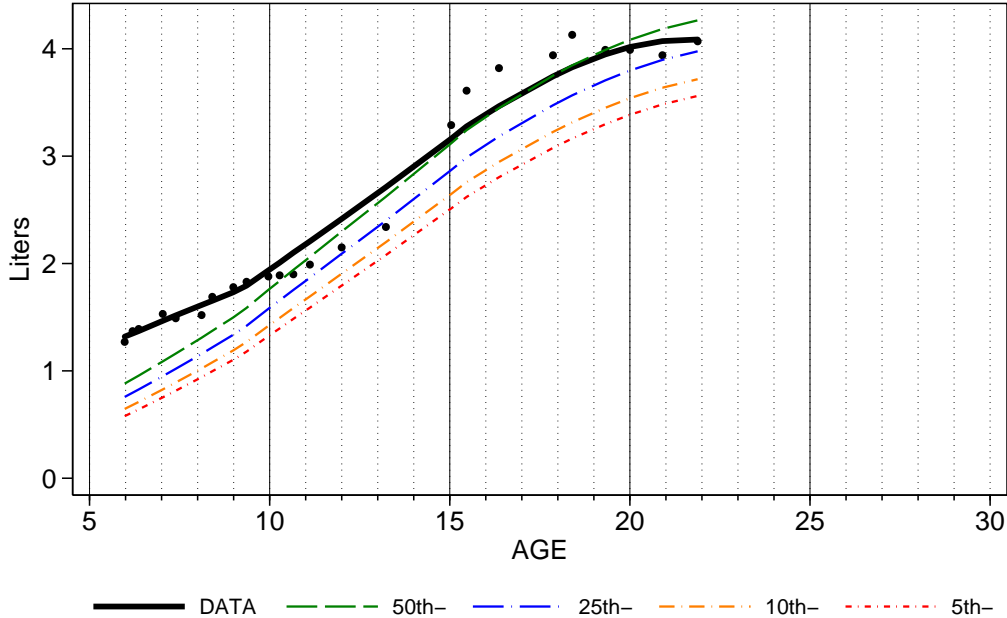

1988

**PATTERN OF GROWTH/DECLINE (Check One)**

- ( 1) Normal Growth
- ( 2) Normal Growth, Early Decline
- ( 3) Reduced Growth
- ( 4) Reduced Growth, Early Decline
- ( 9) Undetermined Pattern
- ( 8) Undetermined - not enough data

Maximum lung growth attained: ( 1) Yes ( 0) No

Plateau started: ( 2) No plateau ( 1) Yes ( 0) No

Decline started: ( 1) Yes ( 0) No

AGE AT each of the following periods (use '99' if N/A):

Maximum Lung Growth: \_\_\_\_ . \_\_\_\_

Start of Plateau: \_\_\_\_ . \_\_\_\_

Start of Decline: \_\_\_\_ . \_\_\_\_

### Pre-BD FEV1 Data and Percentiles: 1995

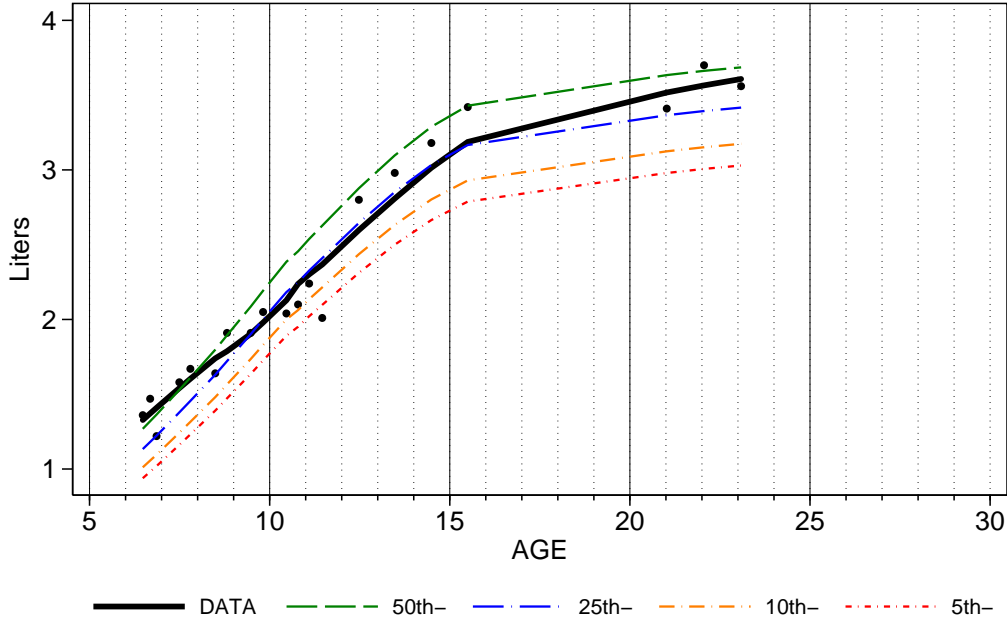

1995

**PATTERN OF GROWTH/DECLINE (Check One)**

- ( 1 ) Normal Growth
- ( 2 ) Normal Growth, Early Decline
- ( 3 ) Reduced Growth
- ( 4 ) Reduced Growth, Early Decline
- ( 9 ) Undetermined Pattern
- ( 8 ) Undetermined - not enough data

Maximum lung growth attained: ( 1 ) Yes ( 0 ) No

Plateau started: ( 2 ) No plateau ( 1 ) Yes ( 0 ) No

Decline started: ( 1 ) Yes ( 0 ) No

AGE AT each of the following periods (use '99' if N/A):

Maximum Lung Growth: \_\_\_\_ . \_\_\_\_

Start of Plateau: \_\_\_\_ . \_\_\_\_

Start of Decline: \_\_\_\_ . \_\_\_\_



### Pre-BD FEV1 Data and Percentiles: 1999

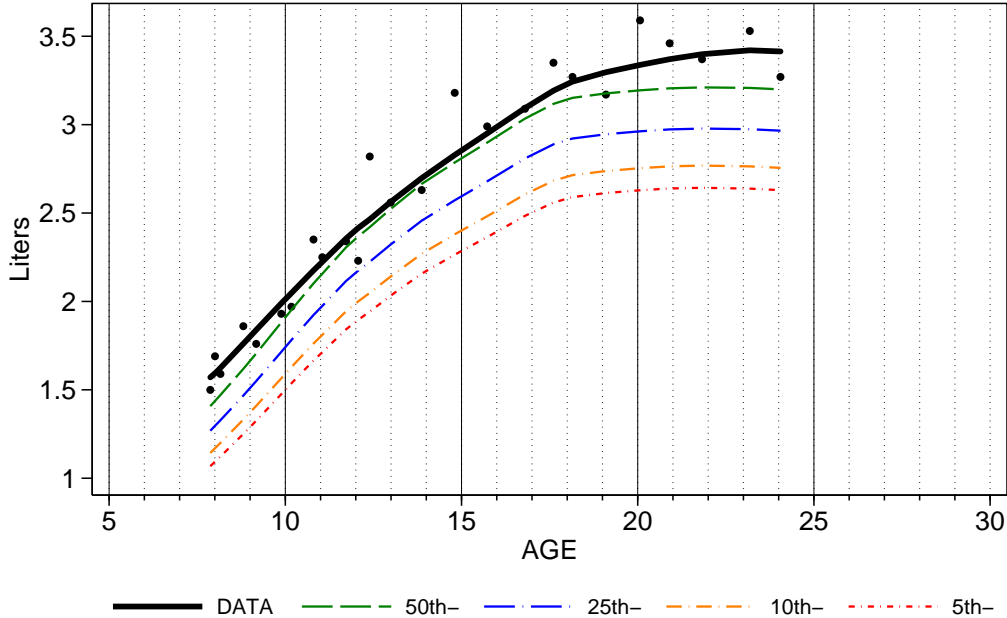

1999

**PATTERN OF GROWTH/DECLINE (Check One)**

- ( 1 ) Normal Growth
- ( 2 ) Normal Growth, Early Decline
- ( 3 ) Reduced Growth
- ( 4 ) Reduced Growth, Early Decline
- ( 9 ) Undetermined Pattern
- ( 8 ) Undetermined - not enough data

Maximum lung growth attained: ( 1 ) Yes ( 0 ) No

Plateau started: ( 2 ) No plateau ( 1 ) Yes ( 0 ) No

Decline started: ( 1 ) Yes ( 0 ) No

AGE AT each of the following periods (use '99' if N/A):

Maximum Lung Growth: \_\_\_\_ . \_\_\_\_

Start of Plateau: \_\_\_\_ . \_\_\_\_

Start of Decline: \_\_\_\_ . \_\_\_\_

### Pre-BD FEV1 Data and Percentiles: 2002

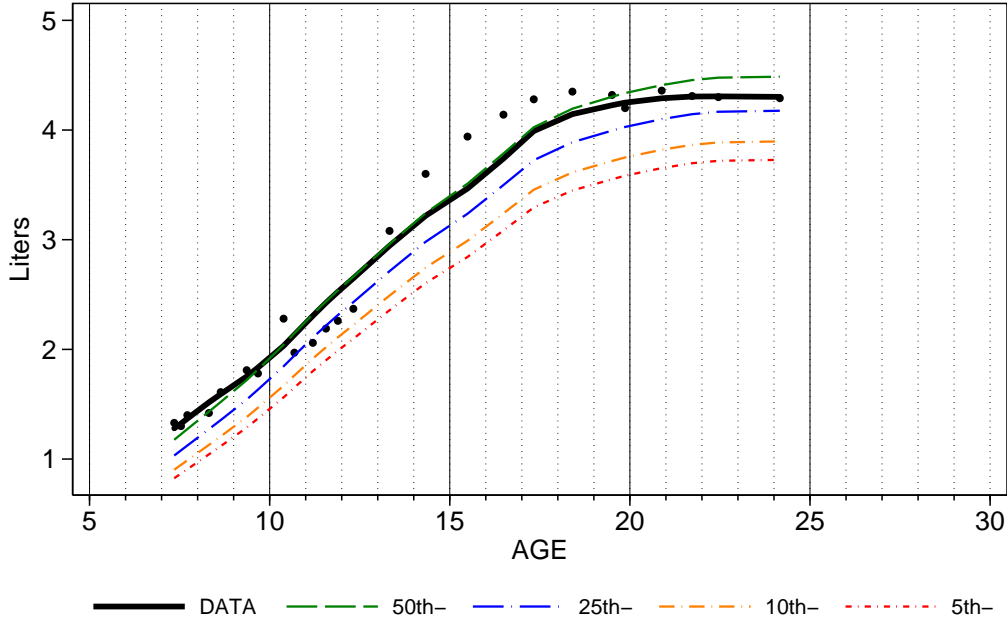

2002

**PATTERN OF GROWTH/DECLINE (Check One)**

- ( 1 ) Normal Growth
- ( 2 ) Normal Growth, Early Decline
- ( 3 ) Reduced Growth
- ( 4 ) Reduced Growth, Early Decline
- ( 9 ) Undetermined Pattern
- ( 8 ) Undetermined - not enough data

Maximum lung growth attained: ( 1 ) Yes ( 0 ) No

Plateau started: ( 2 ) No plateau ( 1 ) Yes ( 0 ) No

Decline started: ( 1 ) Yes ( 0 ) No

AGE AT each of the following periods (use '99' if N/A):

Maximum Lung Growth: \_\_\_\_ . \_\_\_\_

Start of Plateau: \_\_\_\_ . \_\_\_\_

Start of Decline: \_\_\_\_ . \_\_\_\_

### Pre-BD FEV1 Data and Percentiles: 2003

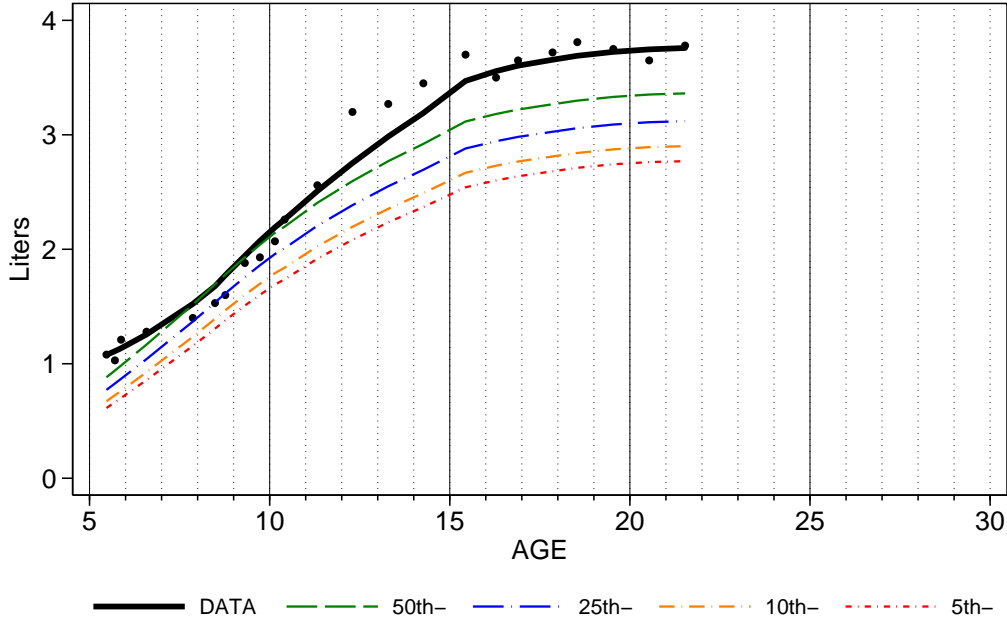

2003

**PATTERN OF GROWTH/DECLINE (Check One)**

- ( 1 ) Normal Growth
- ( 2 ) Normal Growth, Early Decline
- ( 3 ) Reduced Growth
- ( 4 ) Reduced Growth, Early Decline
- ( 9 ) Undetermined Pattern
- ( 8 ) Undetermined - not enough data

Maximum lung growth attained: ( 1 ) Yes ( 0 ) No

Plateau started: ( 2 ) No plateau ( 1 ) Yes ( 0 ) No

Decline started: ( 1 ) Yes ( 0 ) No

AGE AT each of the following periods (use '99' if N/A):

Maximum Lung Growth: \_\_\_\_ . \_\_\_\_

Start of Plateau: \_\_\_\_ . \_\_\_\_

Start of Decline: \_\_\_\_ . \_\_\_\_

### Pre-BD FEV1 Data and Percentiles: 2005

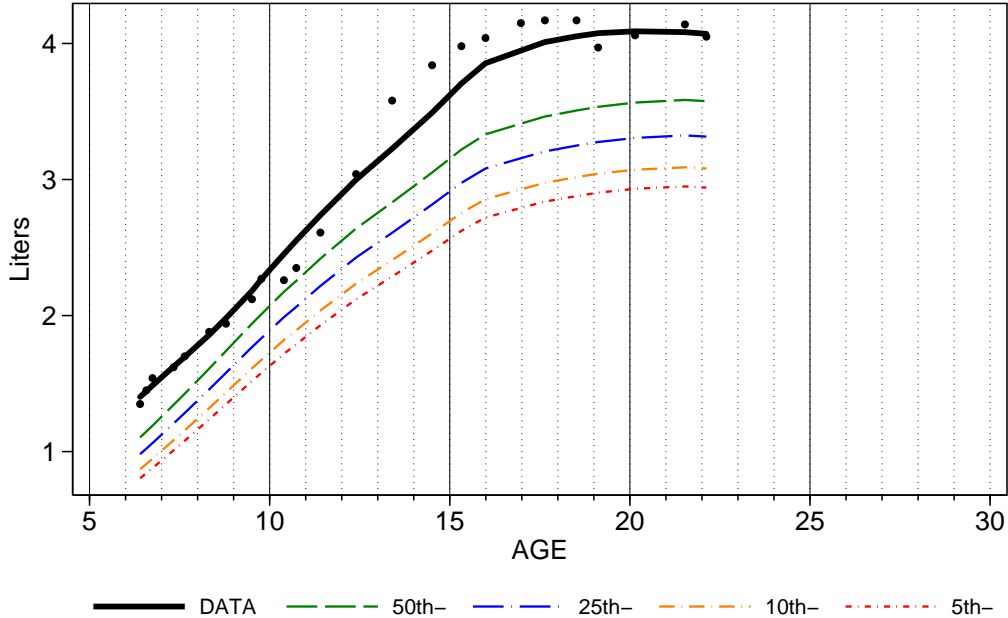

2005

**PATTERN OF GROWTH/DECLINE (Check One)**

- ( 1 ) Normal Growth
- ( 2 ) Normal Growth, Early Decline
- ( 3 ) Reduced Growth
- ( 4 ) Reduced Growth, Early Decline
- ( 9 ) Undetermined Pattern
- ( 8 ) Undetermined - not enough data

Maximum lung growth attained: ( 1 ) Yes ( 0 ) No

Plateau started: ( 2 ) No plateau ( 1 ) Yes ( 0 ) No

Decline started: ( 1 ) Yes ( 0 ) No

AGE AT each of the following periods (use '99' if N/A):

Maximum Lung Growth: \_\_\_\_ . \_\_\_\_

Start of Plateau: \_\_\_\_ . \_\_\_\_

Start of Decline: \_\_\_\_ . \_\_\_\_

### Pre-BD FEV1 Data and Percentiles: 2007

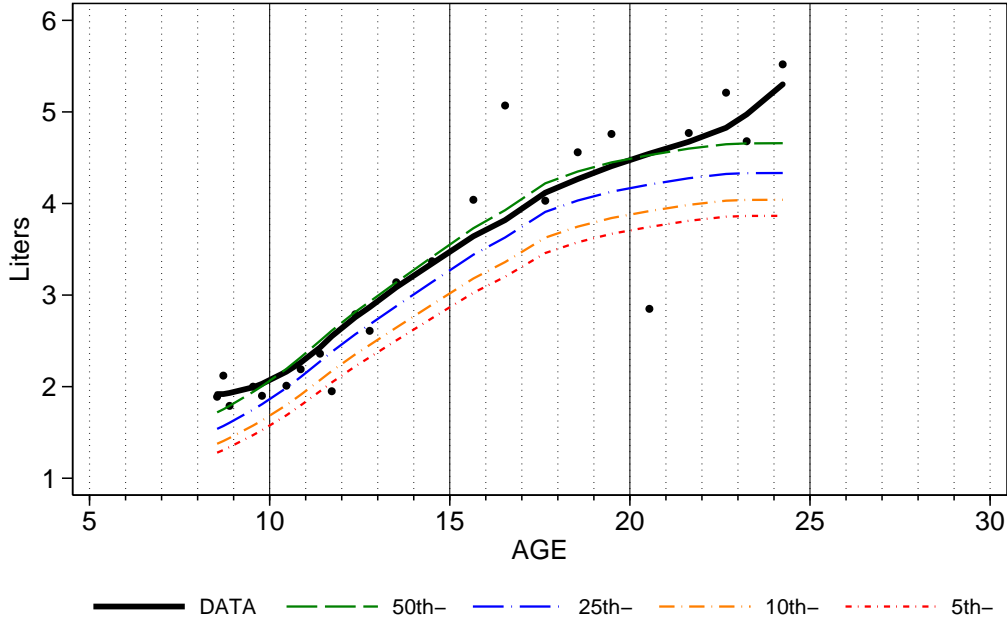

2007

**PATTERN OF GROWTH/DECLINE (Check One)**

- ( 1 ) Normal Growth
- ( 2 ) Normal Growth, Early Decline
- ( 3 ) Reduced Growth
- ( 4 ) Reduced Growth, Early Decline
- ( 9 ) Undetermined Pattern
- ( 8 ) Undetermined - not enough data

Maximum lung growth attained: ( 1 ) Yes ( 0 ) No

Plateau started: ( 2 ) No plateau ( 1 ) Yes ( 0 ) No

Decline started: ( 1 ) Yes ( 0 ) No

AGE AT each of the following periods (use '99' if N/A):

Maximum Lung Growth: \_\_\_\_ . \_\_\_\_

Start of Plateau: \_\_\_\_ . \_\_\_\_

Start of Decline: \_\_\_\_ . \_\_\_\_

### Pre-BD FEV1 Data and Percentiles: 2009

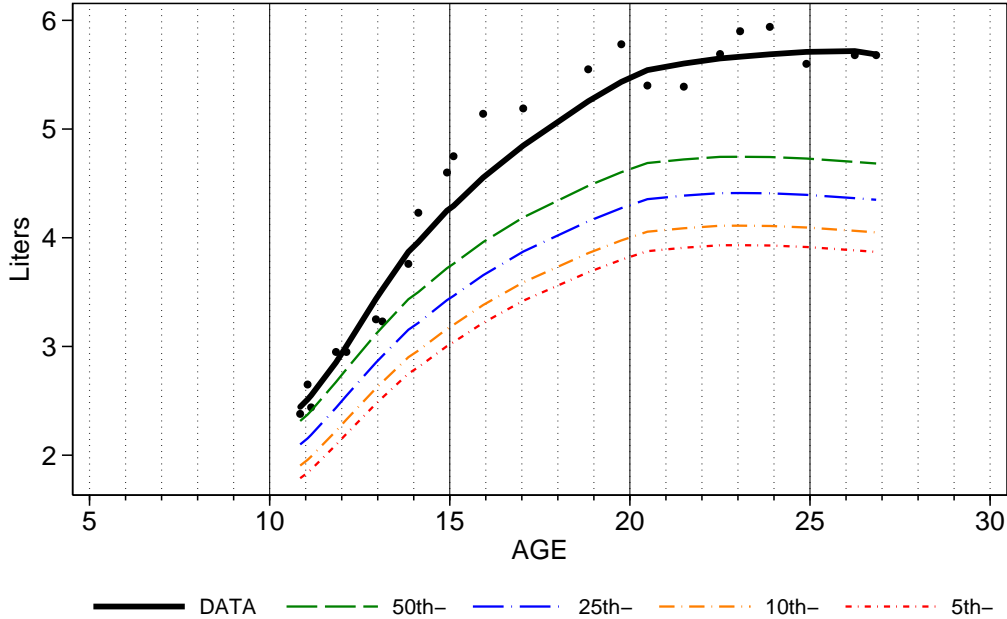

2009

**PATTERN OF GROWTH/DECLINE (Check One)**

- ( 1 ) Normal Growth
- ( 2 ) Normal Growth, Early Decline
- ( 3 ) Reduced Growth
- ( 4 ) Reduced Growth, Early Decline
- ( 9 ) Undetermined Pattern
- ( 8 ) Undetermined - not enough data

Maximum lung growth attained: ( 1 ) Yes ( 0 ) No

Plateau started: ( 2 ) No plateau ( 1 ) Yes ( 0 ) No

Decline started: ( 1 ) Yes ( 0 ) No

AGE AT each of the following periods (use '99' if N/A):

Maximum Lung Growth: \_\_\_\_ . \_\_\_\_

Start of Plateau: \_\_\_\_ . \_\_\_\_

Start of Decline: \_\_\_\_ . \_\_\_\_

### Pre-BD FEV1 Data and Percentiles: 2010

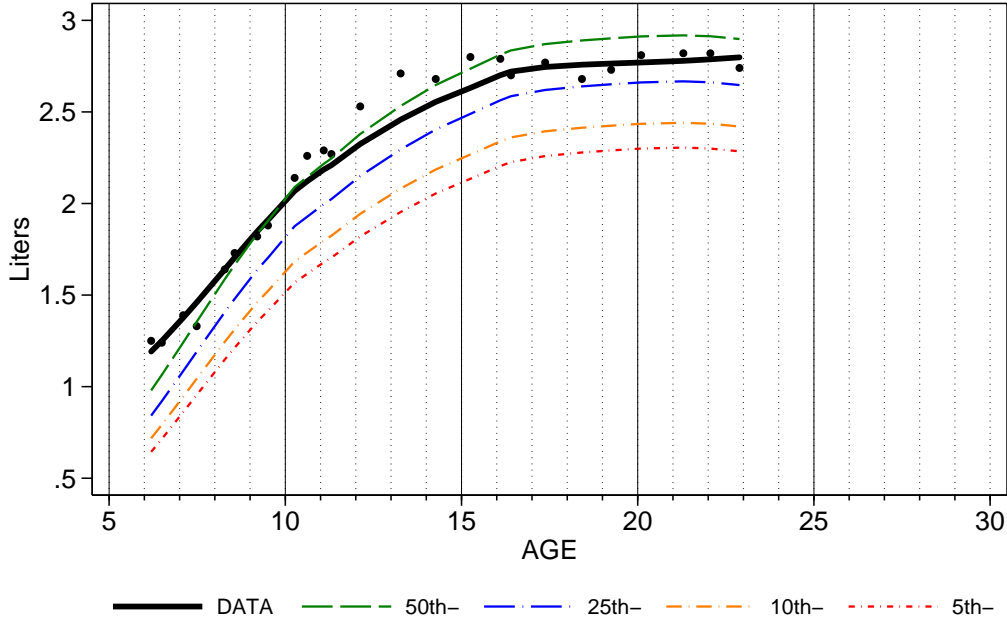

2010

**PATTERN OF GROWTH/DECLINE (Check One)**

- ( 1 ) Normal Growth
- ( 2 ) Normal Growth, Early Decline
- ( 3 ) Reduced Growth
- ( 4 ) Reduced Growth, Early Decline
- ( 9 ) Undetermined Pattern
- ( 8 ) Undetermined - not enough data

Maximum lung growth attained: ( 1 ) Yes ( 0 ) No

Plateau started: ( 2 ) No plateau ( 1 ) Yes ( 0 ) No

Decline started: ( 1 ) Yes ( 0 ) No

AGE AT each of the following periods (use '99' if N/A):

Maximum Lung Growth: \_\_\_\_ . \_\_\_\_

Start of Plateau: \_\_\_\_ . \_\_\_\_

Start of Decline: \_\_\_\_ . \_\_\_\_

### Pre-BD FEV1 Data and Percentiles: 2011

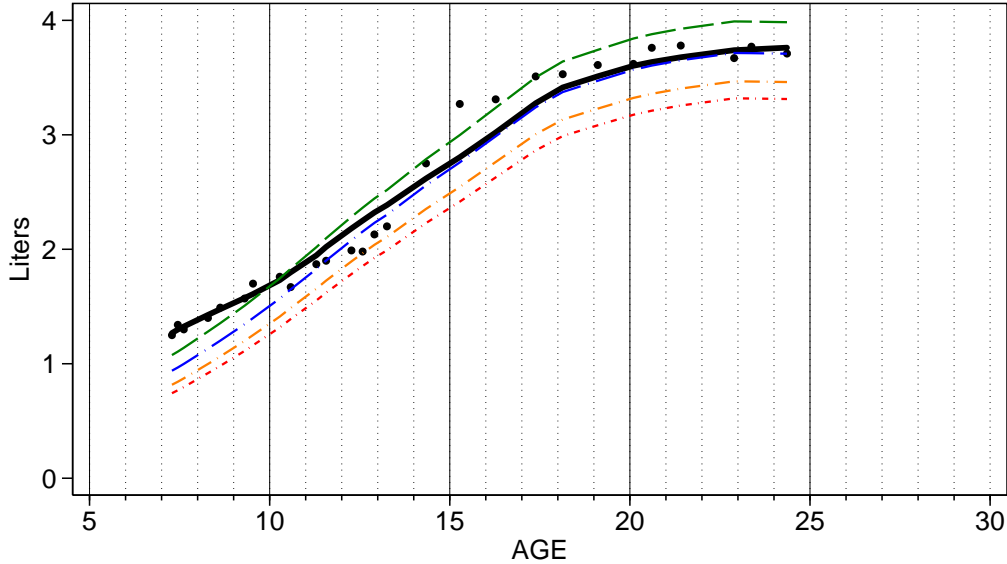

DATA  
  50th-  
  25th-  
  10th-  
  5th-

2011

**PATTERN OF GROWTH/DECLINE (Check One)**

- ( 1 ) Normal Growth
- ( 2 ) Normal Growth, Early Decline
- ( 3 ) Reduced Growth
- ( 4 ) Reduced Growth, Early Decline
- ( 9 ) Undetermined Pattern
- ( 8 ) Undetermined - not enough data

Maximum lung growth attained: ( 1 ) Yes ( 0 ) No

Plateau started: ( 2 ) No plateau ( 1 ) Yes ( 0 ) No

Decline started: ( 1 ) Yes ( 0 ) No

AGE AT each of the following periods (use '99' if N/A):

Maximum Lung Growth: \_\_\_\_ . \_\_\_\_

Start of Plateau: \_\_\_\_ . \_\_\_\_

Start of Decline: \_\_\_\_ . \_\_\_\_



### Pre-BD FEV1 Data and Percentiles: 2015

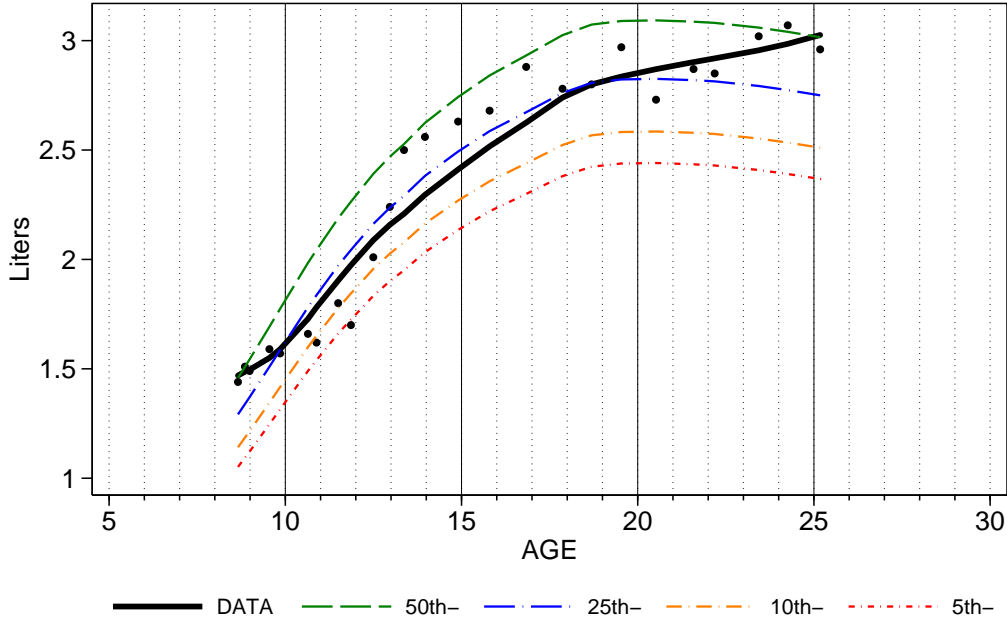

2015

**PATTERN OF GROWTH/DECLINE (Check One)**

- ( 1) Normal Growth
- ( 2) Normal Growth, Early Decline
- ( 3) Reduced Growth
- ( 4) Reduced Growth, Early Decline
- ( 9) Undetermined Pattern
- ( 8) Undetermined - not enough data

Maximum lung growth attained: ( 1) Yes ( 0) No

Plateau started: ( 2) No plateau ( 1) Yes ( 0) No

Decline started: ( 1) Yes ( 0) No

AGE AT each of the following periods (use '99' if N/A):

Maximum Lung Growth: \_\_\_\_ . \_\_\_\_

Start of Plateau: \_\_\_\_ . \_\_\_\_

Start of Decline: \_\_\_\_ . \_\_\_\_

### Pre-BD FEV1 Data and Percentiles: 2027

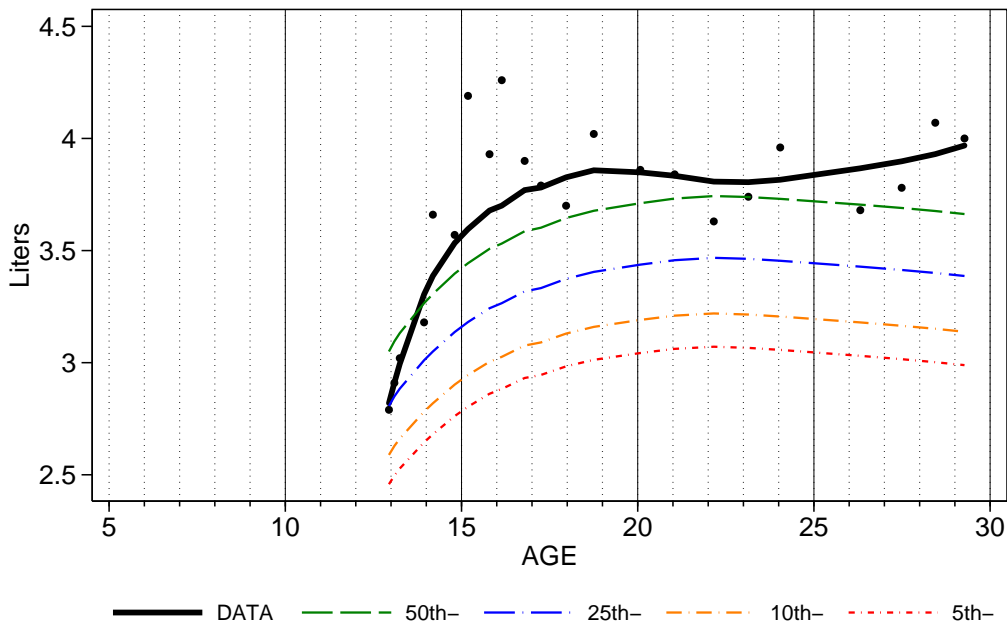

2027

**PATTERN OF GROWTH/DECLINE (Check One)**

- ( 1) Normal Growth
- ( 2) Normal Growth, Early Decline
- ( 3) Reduced Growth
- ( 4) Reduced Growth, Early Decline
- ( 9) Undetermined Pattern
- ( 8) Undetermined - not enough data

Maximum lung growth attained: ( 1) Yes ( 0) No

Plateau started: ( 2) No plateau ( 1) Yes ( 0) No

Decline started: ( 1) Yes ( 0) No

AGE AT each of the following periods (use '99' if N/A):

Maximum Lung Growth: \_\_\_\_ . \_\_\_\_

Start of Plateau: \_\_\_\_ . \_\_\_\_

Start of Decline: \_\_\_\_ . \_\_\_\_

### Pre-BD FEV1 Data and Percentiles: 2030

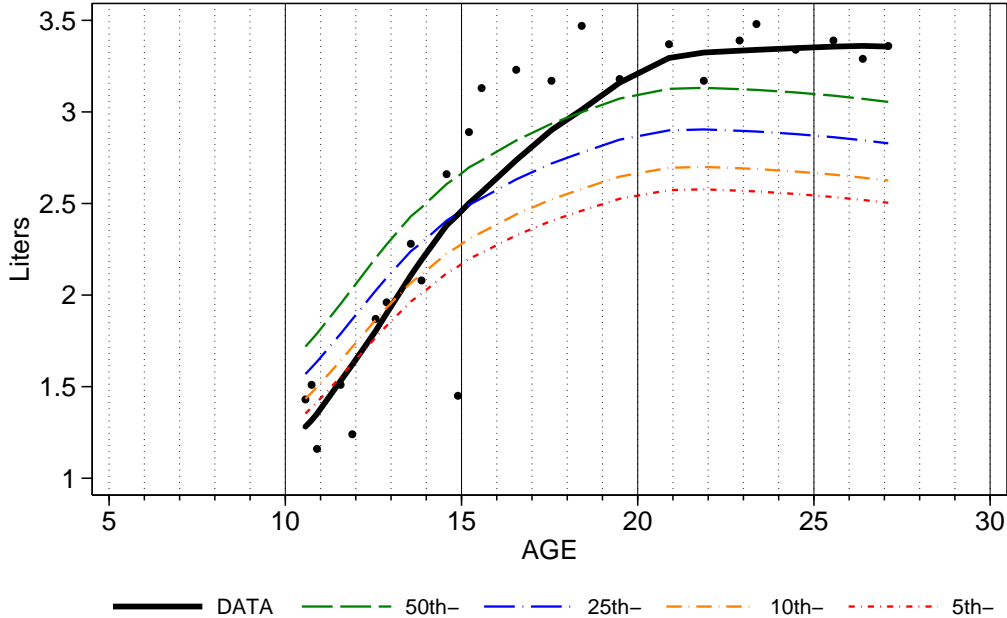

2030

**PATTERN OF GROWTH/DECLINE (Check One)**

- ( 1 ) Normal Growth
- ( 2 ) Normal Growth, Early Decline
- ( 3 ) Reduced Growth
- ( 4 ) Reduced Growth, Early Decline
- ( 9 ) Undetermined Pattern
- ( 8 ) Undetermined - not enough data

Maximum lung growth attained: ( 1 ) Yes ( 0 ) No

Plateau started: ( 2 ) No plateau ( 1 ) Yes ( 0 ) No

Decline started: ( 1 ) Yes ( 0 ) No

AGE AT each of the following periods (use '99' if N/A):

Maximum Lung Growth: \_\_\_\_ . \_\_\_\_

Start of Plateau: \_\_\_\_ . \_\_\_\_

Start of Decline: \_\_\_\_ . \_\_\_\_

### Pre-BD FEV1 Data and Percentiles: 2033

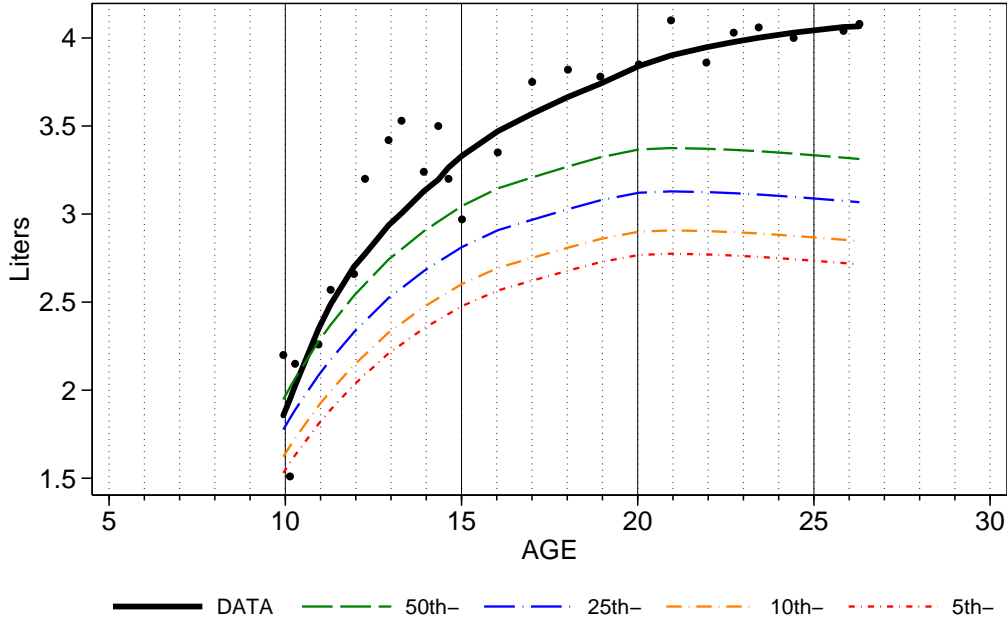

2033

**PATTERN OF GROWTH/DECLINE (Check One)**

- ( 1 ) Normal Growth
- ( 2 ) Normal Growth, Early Decline
- ( 3 ) Reduced Growth
- ( 4 ) Reduced Growth, Early Decline
- ( 9 ) Undetermined Pattern
- ( 8 ) Undetermined - not enough data

Maximum lung growth attained: ( 1 ) Yes ( 0 ) No

Plateau started: ( 2 ) No plateau ( 1 ) Yes ( 0 ) No

Decline started: ( 1 ) Yes ( 0 ) No

AGE AT each of the following periods (use '99' if N/A):

Maximum Lung Growth: \_\_\_\_ . \_\_\_\_

Start of Plateau: \_\_\_\_ . \_\_\_\_

Start of Decline: \_\_\_\_ . \_\_\_\_

### Pre-BD FEV1 Data and Percentiles: 2034

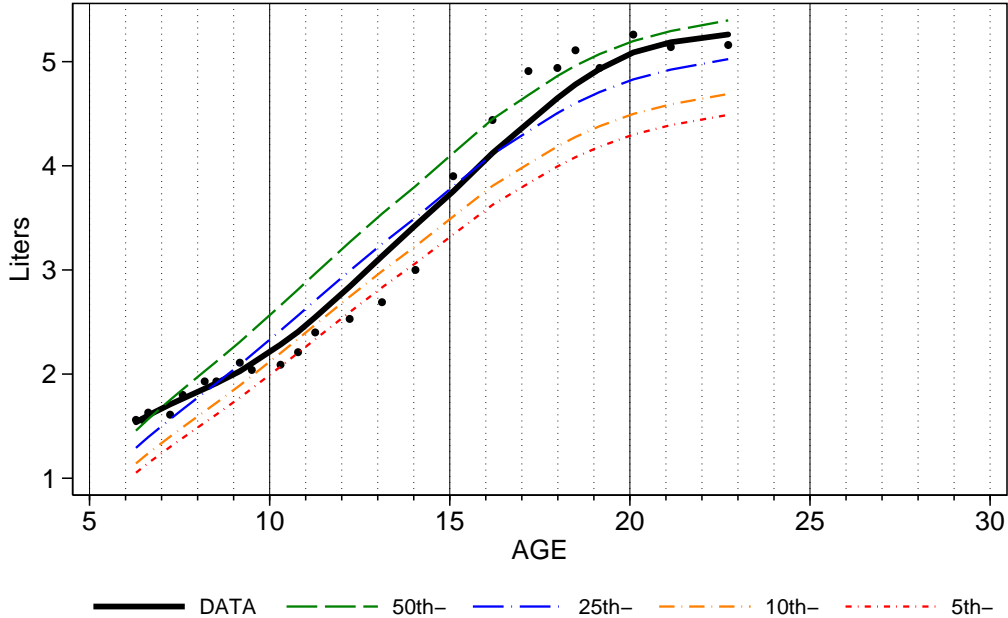

2034

**PATTERN OF GROWTH/DECLINE (Check One)**

- ( 1 ) Normal Growth
- ( 2 ) Normal Growth, Early Decline
- ( 3 ) Reduced Growth
- ( 4 ) Reduced Growth, Early Decline
- ( 9 ) Undetermined Pattern
- ( 8 ) Undetermined - not enough data

Maximum lung growth attained: ( 1 ) Yes ( 0 ) No

Plateau started: ( 2 ) No plateau ( 1 ) Yes ( 0 ) No

Decline started: ( 1 ) Yes ( 0 ) No

AGE AT each of the following periods (use '99' if N/A):

Maximum Lung Growth: \_\_\_\_ . \_\_\_\_

Start of Plateau: \_\_\_\_ . \_\_\_\_

Start of Decline: \_\_\_\_ . \_\_\_\_

### Pre-BD FEV1 Data and Percentiles: 2035

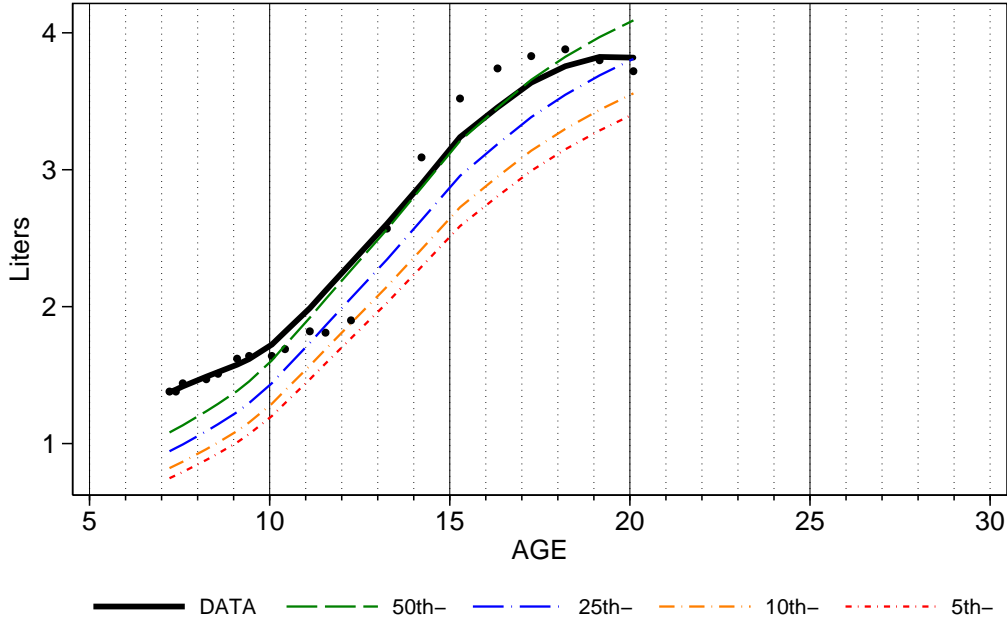

2035

**PATTERN OF GROWTH/DECLINE (Check One)**

- ( 1 ) Normal Growth
- ( 2 ) Normal Growth, Early Decline
- ( 3 ) Reduced Growth
- ( 4 ) Reduced Growth, Early Decline
- ( 9 ) Undetermined Pattern
- ( 8 ) Undetermined - not enough data

Maximum lung growth attained: ( 1 ) Yes ( 0 ) No

Plateau started: ( 2 ) No plateau ( 1 ) Yes ( 0 ) No

Decline started: ( 1 ) Yes ( 0 ) No

AGE AT each of the following periods (use '99' if N/A):

Maximum Lung Growth: \_\_\_\_ . \_\_\_\_

Start of Plateau: \_\_\_\_ . \_\_\_\_

Start of Decline: \_\_\_\_ . \_\_\_\_

### Pre-BD FEV1 Data and Percentiles: 1001

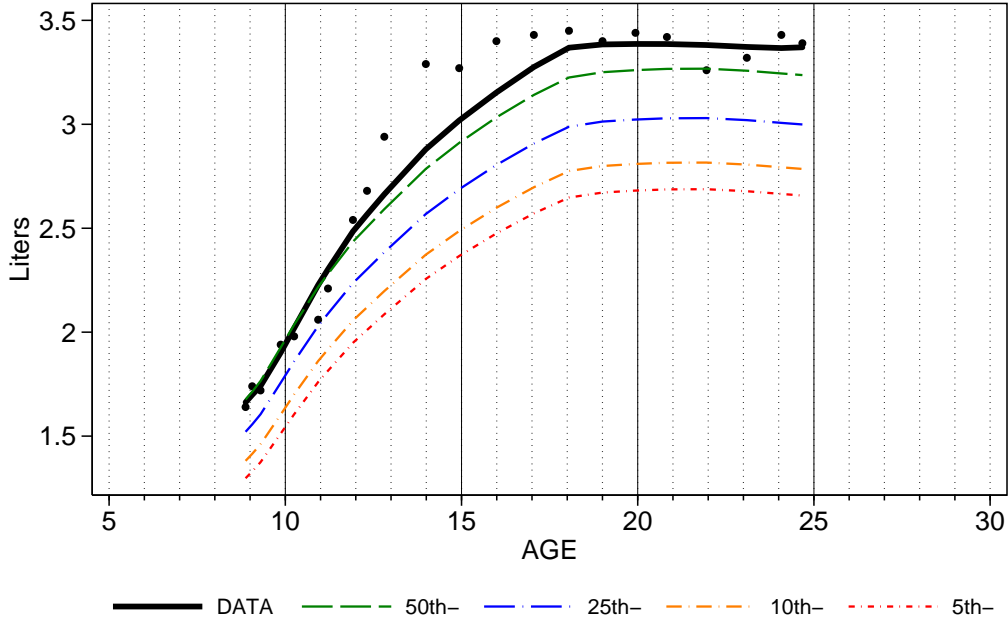

1001

**PATTERN OF GROWTH/DECLINE (Check One)**

- ( 1) Normal Growth
- ( 2) Normal Growth, Early Decline
- ( 3) Reduced Growth
- ( 4) Reduced Growth, Early Decline
- ( 9) Undetermined Pattern
- ( 8) Undetermined - not enough data

Maximum lung growth attained: ( 1) Yes ( 0) No

Plateau started: ( 2) No plateau ( 1) Yes ( 0) No

Decline started: ( 1) Yes ( 0) No

AGE AT each of the following periods (use '99' if N/A):

Maximum Lung Growth: \_\_\_\_ . \_\_\_\_

Start of Plateau: \_\_\_\_ . \_\_\_\_

Start of Decline: \_\_\_\_ . \_\_\_\_

### Pre-BD FEV1 Data and Percentiles: 1008

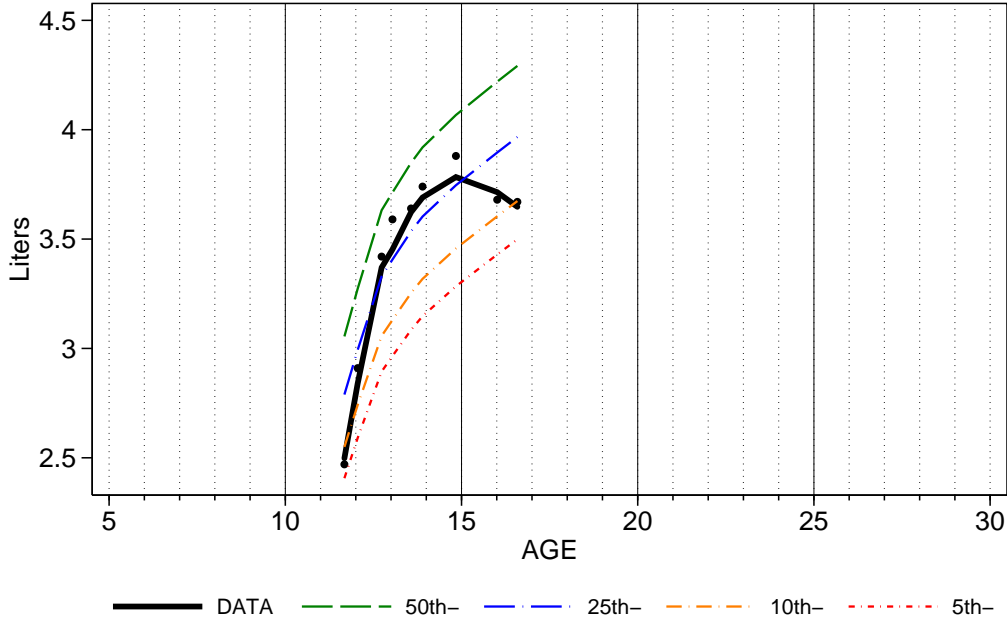

1008

**PATTERN OF GROWTH/DECLINE (Check One)**

- ( 1) Normal Growth
- ( 2) Normal Growth, Early Decline
- ( 3) Reduced Growth
- ( 4) Reduced Growth, Early Decline
- ( 9) Undetermined Pattern
- ( 8) Undetermined - not enough data

Maximum lung growth attained: ( 1) Yes ( 0) No

Plateau started: ( 2) No plateau ( 1) Yes ( 0) No

Decline started: ( 1) Yes ( 0) No

AGE AT each of the following periods (use '99' if N/A):

Maximum Lung Growth: \_\_\_\_ . \_\_\_\_

Start of Plateau: \_\_\_\_ . \_\_\_\_

Start of Decline: \_\_\_\_ . \_\_\_\_



### Pre-BD FEV1 Data and Percentiles: 1012

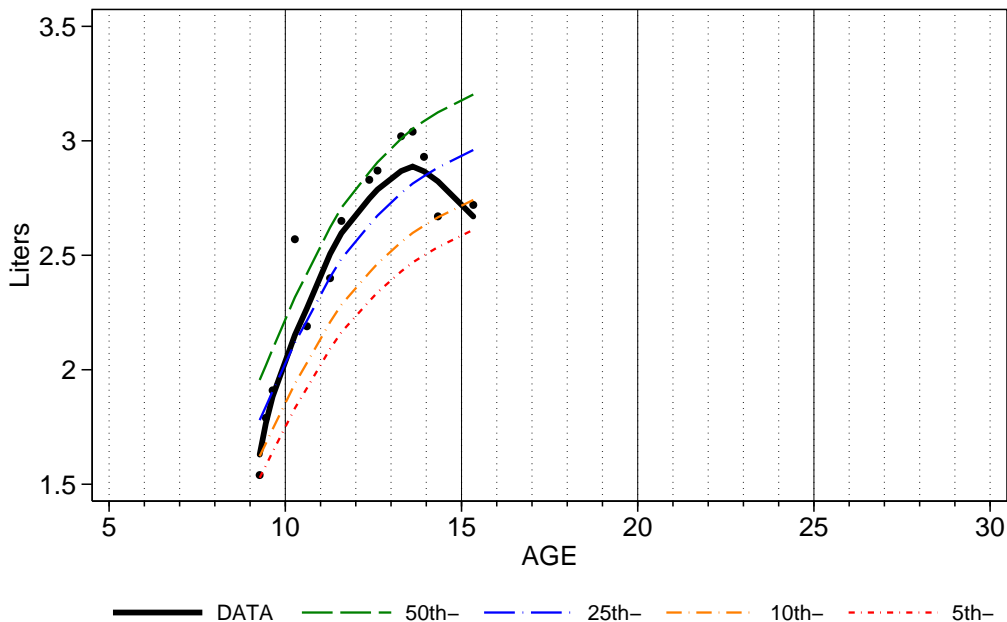

1012

**PATTERN OF GROWTH/DECLINE (Check One)**

- ( 1 ) Normal Growth
- ( 2 ) Normal Growth, Early Decline
- ( 3 ) Reduced Growth
- ( 4 ) Reduced Growth, Early Decline
- ( 9 ) Undetermined Pattern
- ( 8 ) Undetermined - not enough data

Maximum lung growth attained: ( 1 ) Yes ( 0 ) No

Plateau started: ( 2 ) No plateau ( 1 ) Yes ( 0 ) No

Decline started: ( 1 ) Yes ( 0 ) No

AGE AT each of the following periods (use '99' if N/A):

Maximum Lung Growth: \_\_\_\_ . \_\_\_\_

Start of Plateau: \_\_\_\_ . \_\_\_\_

Start of Decline: \_\_\_\_ . \_\_\_\_

### Pre-BD FEV1 Data and Percentiles: 1014

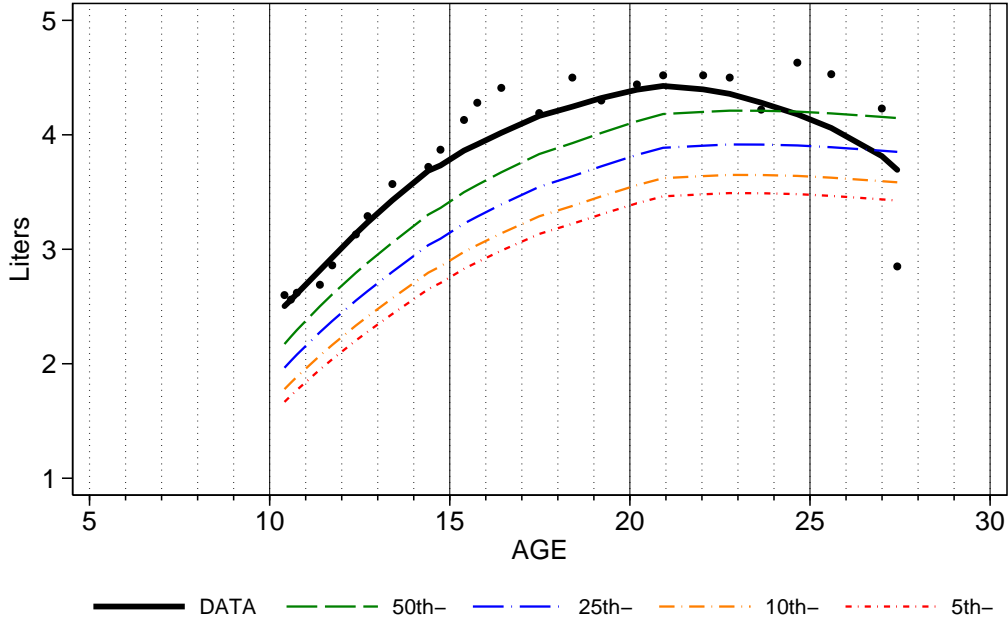

1014

**PATTERN OF GROWTH/DECLINE (Check One)**

- ( 1 ) Normal Growth
- ( 2 ) Normal Growth, Early Decline
- ( 3 ) Reduced Growth
- ( 4 ) Reduced Growth, Early Decline
- ( 9 ) Undetermined Pattern
- ( 8 ) Undetermined - not enough data

Maximum lung growth attained: ( 1 ) Yes ( 0 ) No

Plateau started: ( 2 ) No plateau ( 1 ) Yes ( 0 ) No

Decline started: ( 1 ) Yes ( 0 ) No

AGE AT each of the following periods (use '99' if N/A):

Maximum Lung Growth: \_\_\_\_ . \_\_\_\_

Start of Plateau: \_\_\_\_ . \_\_\_\_

Start of Decline: \_\_\_\_ . \_\_\_\_

### Pre-BD FEV1 Data and Percentiles: 1021

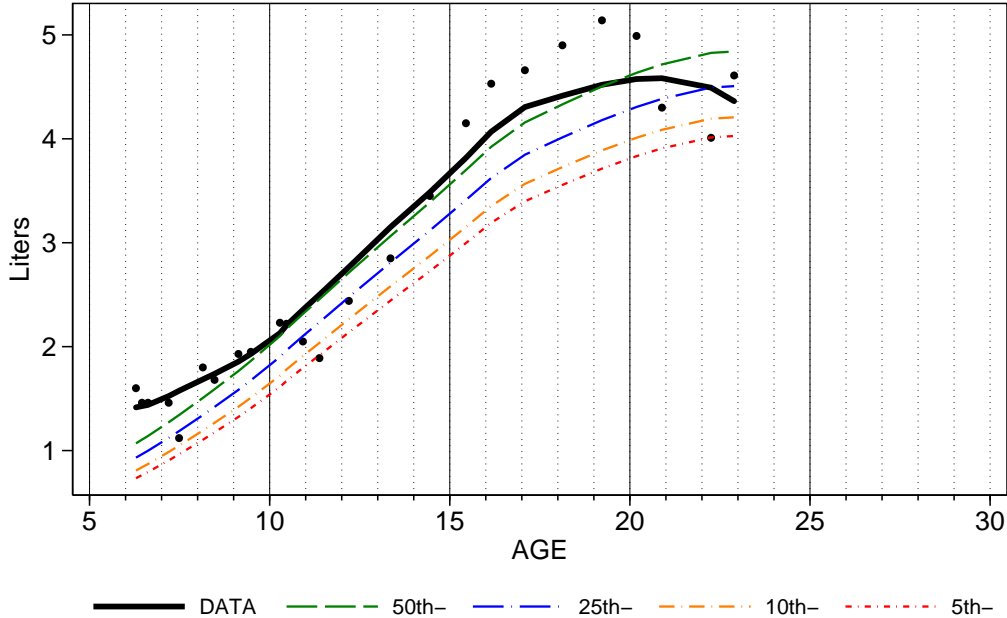

1021

**PATTERN OF GROWTH/DECLINE (Check One)**

- ( 1 ) Normal Growth
- ( 2 ) Normal Growth, Early Decline
- ( 3 ) Reduced Growth
- ( 4 ) Reduced Growth, Early Decline
- ( 9 ) Undetermined Pattern
- ( 8 ) Undetermined - not enough data

Maximum lung growth attained: ( 1 ) Yes ( 0 ) No

Plateau started: ( 2 ) No plateau ( 1 ) Yes ( 0 ) No

Decline started: ( 1 ) Yes ( 0 ) No

AGE AT each of the following periods (use '99' if N/A):

Maximum Lung Growth: \_\_\_\_ . \_\_\_\_

Start of Plateau: \_\_\_\_ . \_\_\_\_

Start of Decline: \_\_\_\_ . \_\_\_\_

### Pre-BD FEV1 Data and Percentiles: 1023

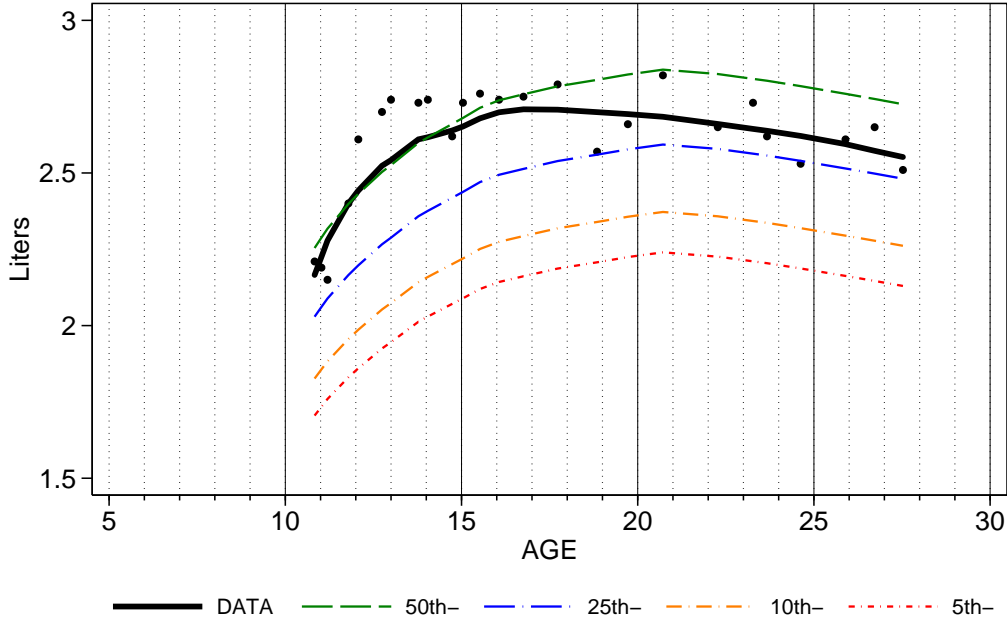

1023

**PATTERN OF GROWTH/DECLINE (Check One)**

- ( 1) Normal Growth
- ( 2) Normal Growth, Early Decline
- ( 3) Reduced Growth
- ( 4) Reduced Growth, Early Decline
- ( 9) Undetermined Pattern
- ( 8) Undetermined - not enough data

Maximum lung growth attained: ( 1) Yes ( 0) No

Plateau started: ( 2) No plateau ( 1) Yes ( 0) No

Decline started: ( 1) Yes ( 0) No

AGE AT each of the following periods (use '99' if N/A):

Maximum Lung Growth: \_\_\_\_ . \_\_\_\_

Start of Plateau: \_\_\_\_ . \_\_\_\_

Start of Decline: \_\_\_\_ . \_\_\_\_

### Pre-BD FEV1 Data and Percentiles: 1025

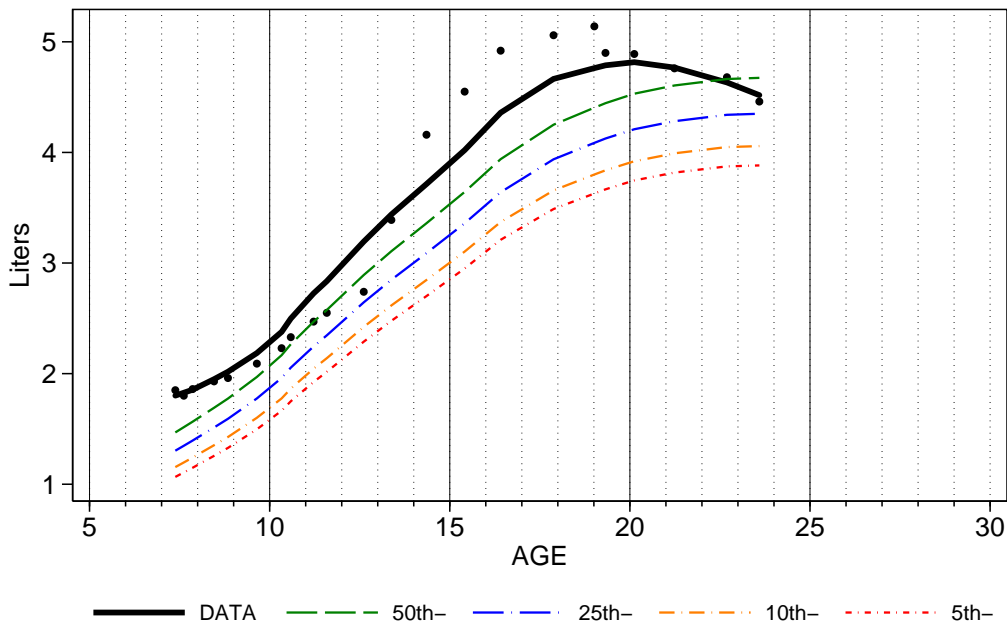

1025

**PATTERN OF GROWTH/DECLINE (Check One)**

- ( 1 ) Normal Growth
- ( 2 ) Normal Growth, Early Decline
- ( 3 ) Reduced Growth
- ( 4 ) Reduced Growth, Early Decline
- ( 9 ) Undetermined Pattern
- ( 8 ) Undetermined - not enough data

Maximum lung growth attained: ( 1 ) Yes ( 0 ) No

Plateau started: ( 2 ) No plateau ( 1 ) Yes ( 0 ) No

Decline started: ( 1 ) Yes ( 0 ) No

AGE AT each of the following periods (use '99' if N/A):

Maximum Lung Growth: \_\_\_\_ . \_\_\_\_

Start of Plateau: \_\_\_\_ . \_\_\_\_

Start of Decline: \_\_\_\_ . \_\_\_\_

### Pre-BD FEV1 Data and Percentiles: 1027

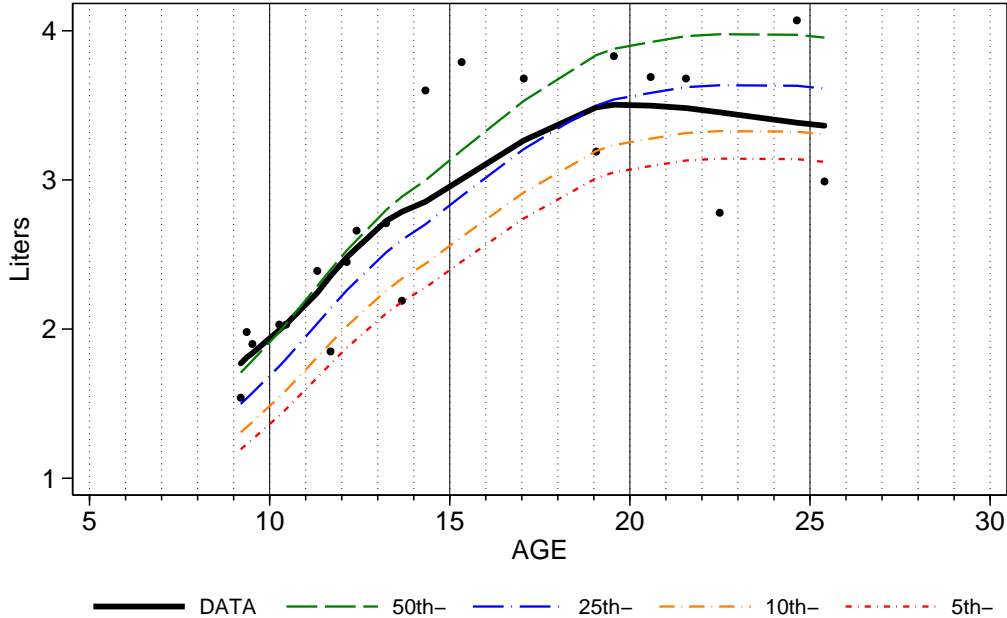

1027

**PATTERN OF GROWTH/DECLINE (Check One)**

- ( 1 ) Normal Growth
- ( 2 ) Normal Growth, Early Decline
- ( 3 ) Reduced Growth
- ( 4 ) Reduced Growth, Early Decline
- ( 9 ) Undetermined Pattern
- ( 8 ) Undetermined - not enough data

Maximum lung growth attained: ( 1 ) Yes ( 0 ) No

Plateau started: ( 2 ) No plateau ( 1 ) Yes ( 0 ) No

Decline started: ( 1 ) Yes ( 0 ) No

AGE AT each of the following periods (use '99' if N/A):

Maximum Lung Growth: \_\_\_\_ . \_\_\_\_

Start of Plateau: \_\_\_\_ . \_\_\_\_

Start of Decline: \_\_\_\_ . \_\_\_\_

### Pre-BD FEV1 Data and Percentiles: 1028

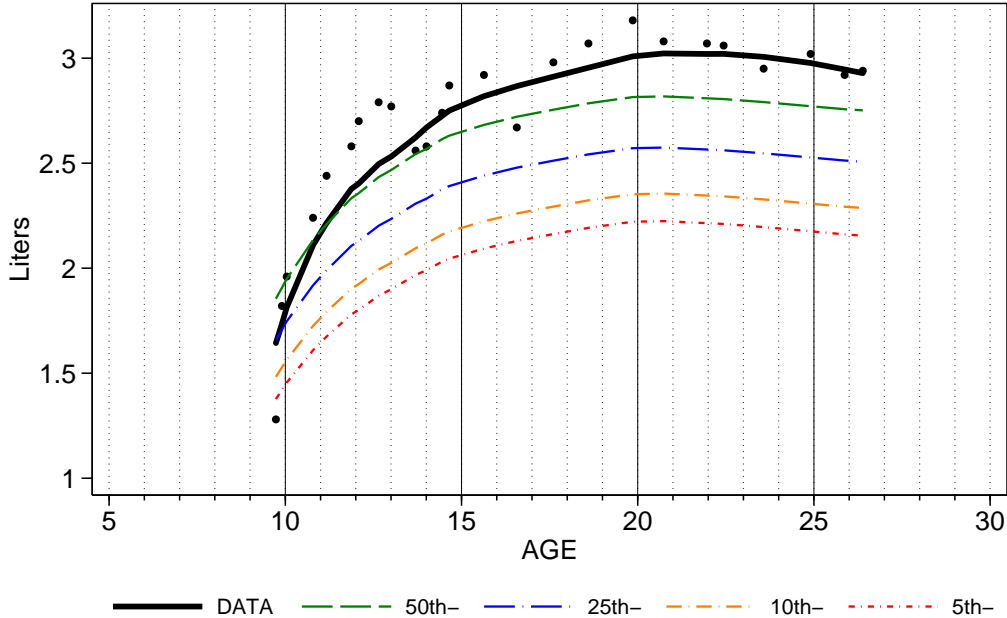

1028

**PATTERN OF GROWTH/DECLINE (Check One)**

- ( 1 ) Normal Growth
- ( 2 ) Normal Growth, Early Decline
- ( 3 ) Reduced Growth
- ( 4 ) Reduced Growth, Early Decline
- ( 9 ) Undetermined Pattern
- ( 8 ) Undetermined - not enough data

Maximum lung growth attained: ( 1 ) Yes ( 0 ) No

Plateau started: ( 2 ) No plateau ( 1 ) Yes ( 0 ) No

Decline started: ( 1 ) Yes ( 0 ) No

AGE AT each of the following periods (use '99' if N/A):

Maximum Lung Growth: \_\_\_\_ . \_\_\_\_

Start of Plateau: \_\_\_\_ . \_\_\_\_

Start of Decline: \_\_\_\_ . \_\_\_\_

### Pre-BD FEV1 Data and Percentiles: 1030

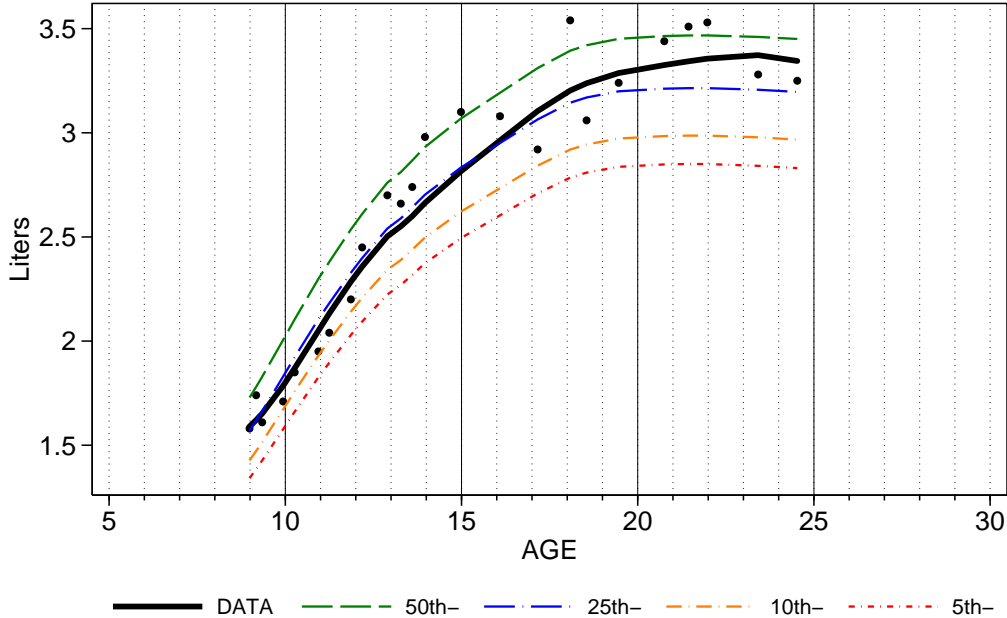

1030

**PATTERN OF GROWTH/DECLINE (Check One)**

- ( 1 ) Normal Growth
- ( 2 ) Normal Growth, Early Decline
- ( 3 ) Reduced Growth
- ( 4 ) Reduced Growth, Early Decline
- ( 9 ) Undetermined Pattern
- ( 8 ) Undetermined - not enough data

Maximum lung growth attained: ( 1 ) Yes ( 0 ) No

Plateau started: ( 2 ) No plateau ( 1 ) Yes ( 0 ) No

Decline started: ( 1 ) Yes ( 0 ) No

AGE AT each of the following periods (use '99' if N/A):

Maximum Lung Growth: \_\_\_\_ . \_\_\_\_

Start of Plateau: \_\_\_\_ . \_\_\_\_

Start of Decline: \_\_\_\_ . \_\_\_\_



### Pre-BD FEV1 Data and Percentiles: 1034

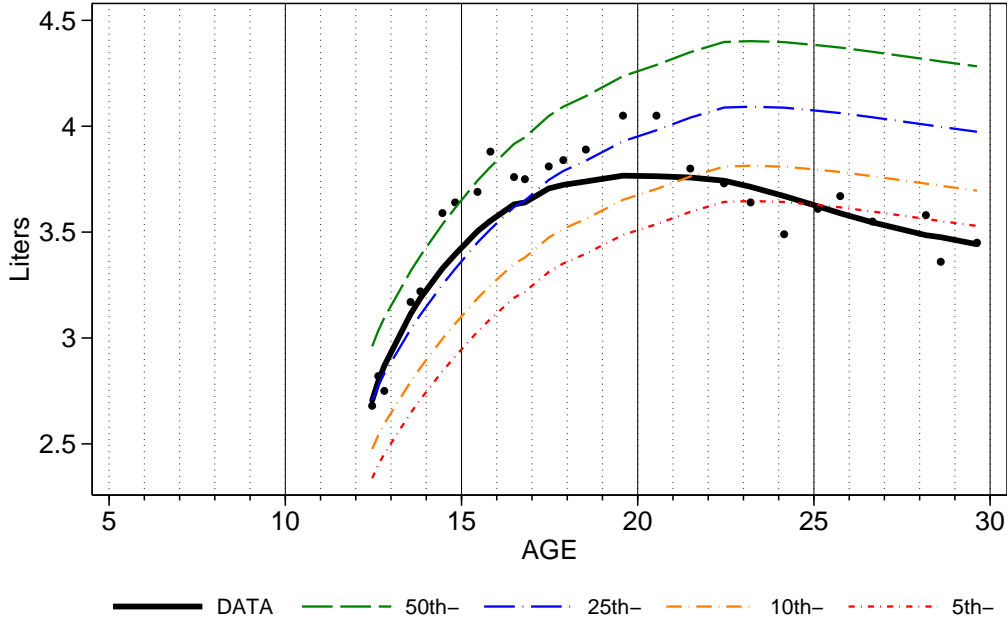

1034

**PATTERN OF GROWTH/DECLINE (Check One)**

- ( 1 ) Normal Growth
- ( 2 ) Normal Growth, Early Decline
- ( 3 ) Reduced Growth
- ( 4 ) Reduced Growth, Early Decline
- ( 9 ) Undetermined Pattern
- ( 8 ) Undetermined - not enough data

Maximum lung growth attained: ( 1 ) Yes ( 0 ) No

Plateau started: ( 2 ) No plateau ( 1 ) Yes ( 0 ) No

Decline started: ( 1 ) Yes ( 0 ) No

AGE AT each of the following periods (use '99' if N/A):

Maximum Lung Growth: \_\_\_\_ . \_\_\_\_

Start of Plateau: \_\_\_\_ . \_\_\_\_

Start of Decline: \_\_\_\_ . \_\_\_\_

### Pre-BD FEV1 Data and Percentiles: 1045

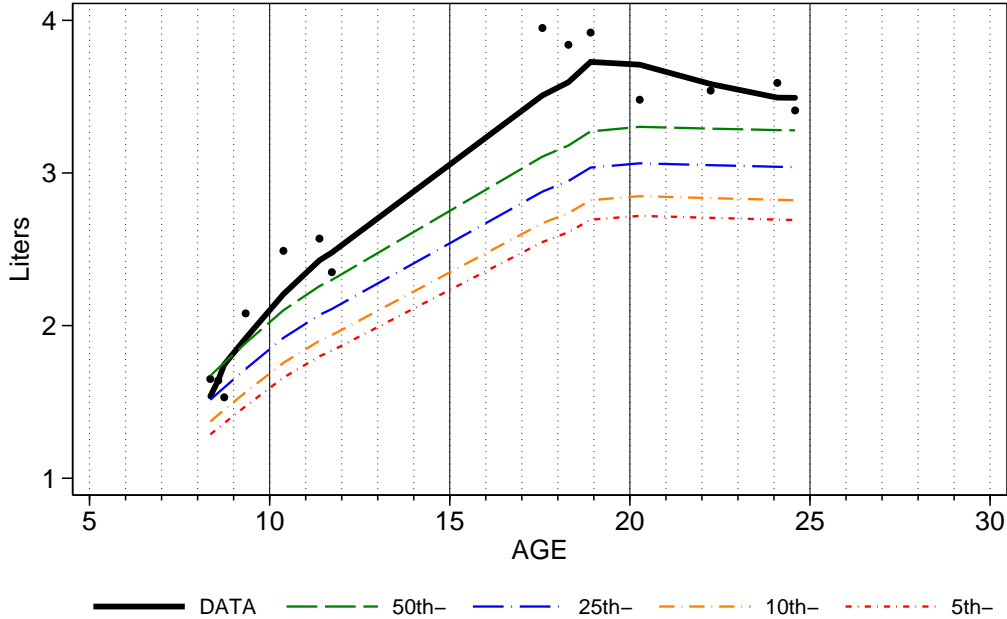

1045

**PATTERN OF GROWTH/DECLINE (Check One)**

- ( 1 ) Normal Growth
- ( 2 ) Normal Growth, Early Decline
- ( 3 ) Reduced Growth
- ( 4 ) Reduced Growth, Early Decline
- ( 9 ) Undetermined Pattern
- ( 8 ) Undetermined - not enough data

Maximum lung growth attained: ( 1 ) Yes ( 0 ) No

Plateau started: ( 2 ) No plateau ( 1 ) Yes ( 0 ) No

Decline started: ( 1 ) Yes ( 0 ) No

AGE AT each of the following periods (use '99' if N/A):

Maximum Lung Growth: \_\_\_\_ . \_\_\_\_

Start of Plateau: \_\_\_\_ . \_\_\_\_

Start of Decline: \_\_\_\_ . \_\_\_\_

### Pre-BD FEV1 Data and Percentiles: 1046

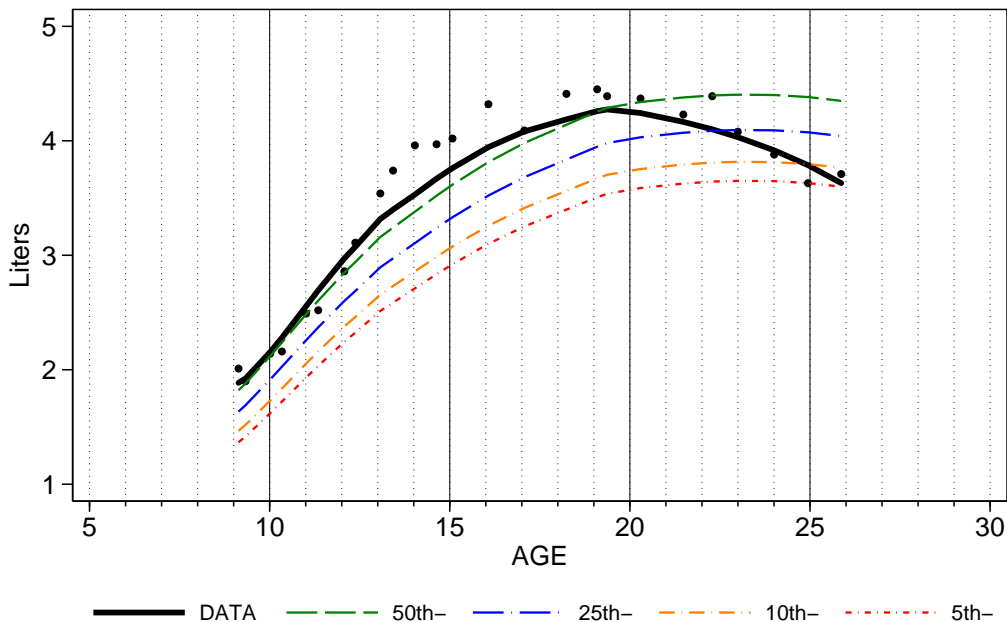

1046

**PATTERN OF GROWTH/DECLINE (Check One)**

- ( 1 ) Normal Growth
- ( 2 ) Normal Growth, Early Decline
- ( 3 ) Reduced Growth
- ( 4 ) Reduced Growth, Early Decline
- ( 9 ) Undetermined Pattern
- ( 8 ) Undetermined - not enough data

Maximum lung growth attained: ( 1 ) Yes ( 0 ) No

Plateau started: ( 2 ) No plateau ( 1 ) Yes ( 0 ) No

Decline started: ( 1 ) Yes ( 0 ) No

AGE AT each of the following periods (use '99' if N/A):

Maximum Lung Growth: \_\_\_\_ . \_\_\_\_

Start of Plateau: \_\_\_\_ . \_\_\_\_

Start of Decline: \_\_\_\_ . \_\_\_\_

### Pre-BD FEV1 Data and Percentiles: 1078

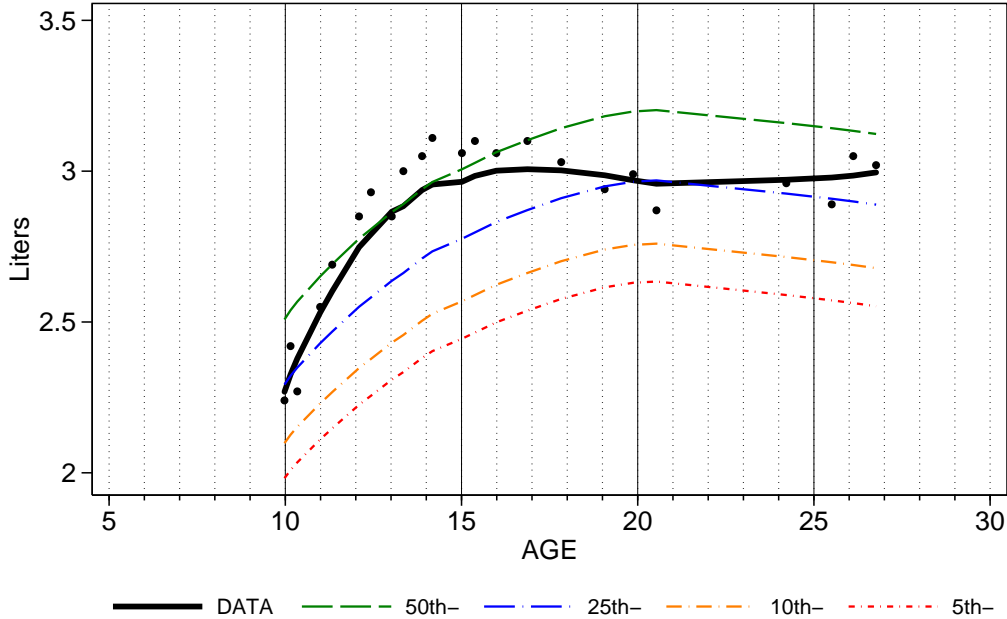

1078

**PATTERN OF GROWTH/DECLINE (Check One)**

- ( 1) Normal Growth
- ( 2) Normal Growth, Early Decline
- ( 3) Reduced Growth
- ( 4) Reduced Growth, Early Decline
- ( 9) Undetermined Pattern
- ( 8) Undetermined - not enough data

Maximum lung growth attained: ( 1) Yes ( 0) No

Plateau started: ( 2) No plateau ( 1) Yes ( 0) No

Decline started: ( 1) Yes ( 0) No

AGE AT each of the following periods (use '99' if N/A):

Maximum Lung Growth: \_\_\_\_ . \_\_\_\_

Start of Plateau: \_\_\_\_ . \_\_\_\_

Start of Decline: \_\_\_\_ . \_\_\_\_

### Pre-BD FEV1 Data and Percentiles: 1097

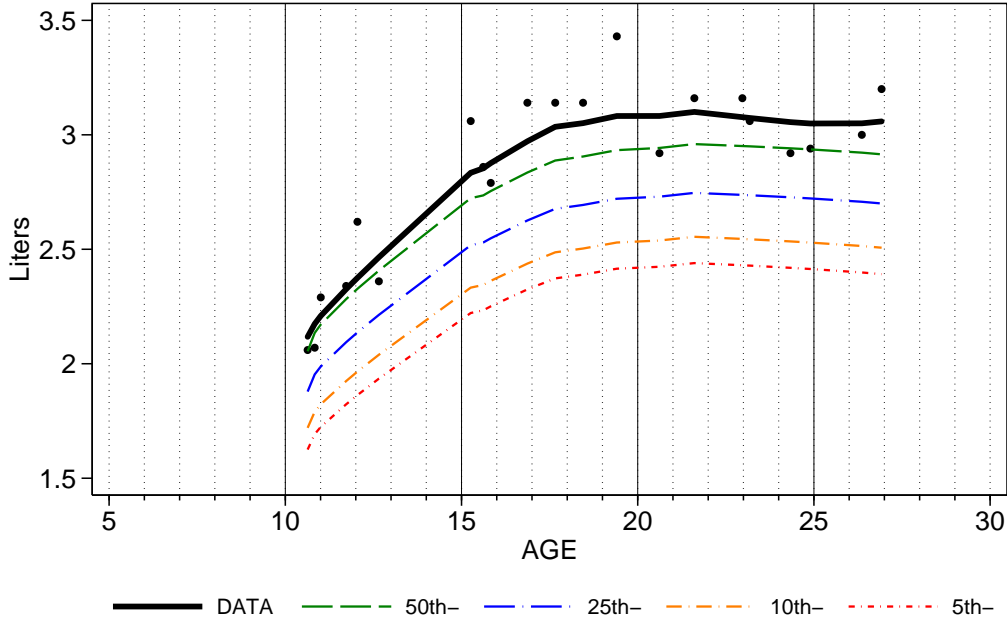

1097

**PATTERN OF GROWTH/DECLINE (Check One)**

- ( 1) Normal Growth
- ( 2) Normal Growth, Early Decline
- ( 3) Reduced Growth
- ( 4) Reduced Growth, Early Decline
- ( 9) Undetermined Pattern
- ( 8) Undetermined - not enough data

Maximum lung growth attained: ( 1) Yes ( 0) No

Plateau started: ( 2) No plateau ( 1) Yes ( 0) No

Decline started: ( 1) Yes ( 0) No

AGE AT each of the following periods (use '99' if N/A):

Maximum Lung Growth: \_\_\_\_ . \_\_\_\_

Start of Plateau: \_\_\_\_ . \_\_\_\_

Start of Decline: \_\_\_\_ . \_\_\_\_

### Pre-BD FEV1 Data and Percentiles: 1107

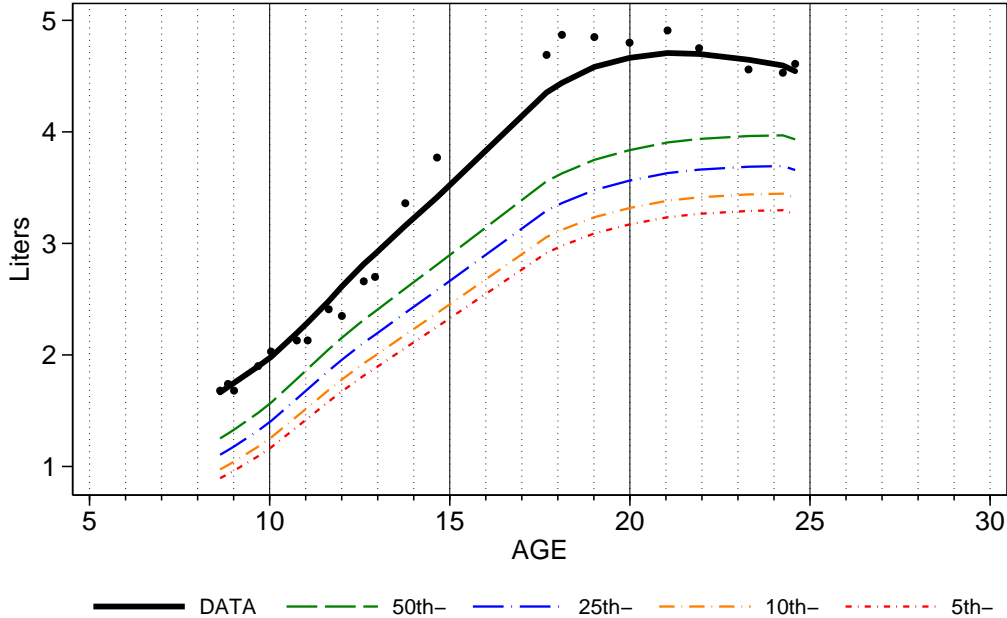

1107

**PATTERN OF GROWTH/DECLINE (Check One)**

- ( 1 ) Normal Growth
- ( 2 ) Normal Growth, Early Decline
- ( 3 ) Reduced Growth
- ( 4 ) Reduced Growth, Early Decline
- ( 9 ) Undetermined Pattern
- ( 8 ) Undetermined - not enough data

Maximum lung growth attained: ( 1 ) Yes ( 0 ) No

Plateau started: ( 2 ) No plateau ( 1 ) Yes ( 0 ) No

Decline started: ( 1 ) Yes ( 0 ) No

AGE AT each of the following periods (use '99' if N/A):

Maximum Lung Growth: \_\_\_\_ . \_\_\_\_

Start of Plateau: \_\_\_\_ . \_\_\_\_

Start of Decline: \_\_\_\_ . \_\_\_\_

### Pre-BD FEV1 Data and Percentiles: 1109

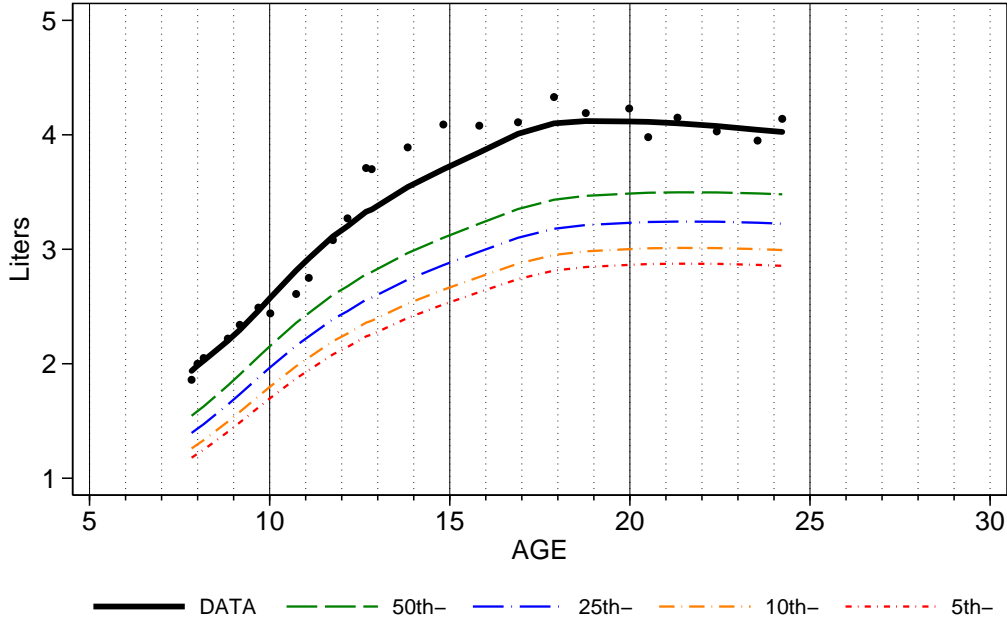

1109

**PATTERN OF GROWTH/DECLINE (Check One)**

- ( 1) Normal Growth
- ( 2) Normal Growth, Early Decline
- ( 3) Reduced Growth
- ( 4) Reduced Growth, Early Decline
- ( 9) Undetermined Pattern
- ( 8) Undetermined - not enough data

Maximum lung growth attained: ( 1) Yes ( 0) No

Plateau started: ( 2) No plateau ( 1) Yes ( 0) No

Decline started: ( 1) Yes ( 0) No

AGE AT each of the following periods (use '99' if N/A):

Maximum Lung Growth: \_\_\_\_ . \_\_\_\_

Start of Plateau: \_\_\_\_ . \_\_\_\_

Start of Decline: \_\_\_\_ . \_\_\_\_

### Pre-BD FEV1 Data and Percentiles: 1112

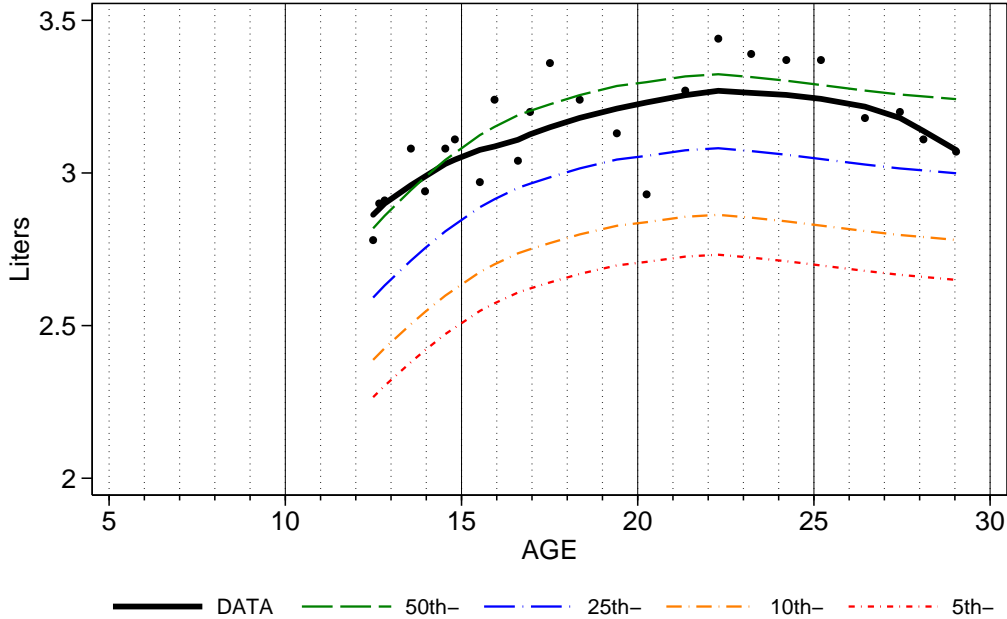

1112

**PATTERN OF GROWTH/DECLINE (Check One)**

- ( 1) Normal Growth
- ( 2) Normal Growth, Early Decline
- ( 3) Reduced Growth
- ( 4) Reduced Growth, Early Decline
- ( 9) Undetermined Pattern
- ( 8) Undetermined - not enough data

Maximum lung growth attained: ( 1) Yes ( 0) No

Plateau started: ( 2) No plateau ( 1) Yes ( 0) No

Decline started: ( 1) Yes ( 0) No

AGE AT each of the following periods (use '99' if N/A):

Maximum Lung Growth: \_\_\_\_ . \_\_\_\_

Start of Plateau: \_\_\_\_ . \_\_\_\_

Start of Decline: \_\_\_\_ . \_\_\_\_



### Pre-BD FEV1 Data and Percentiles: 1117

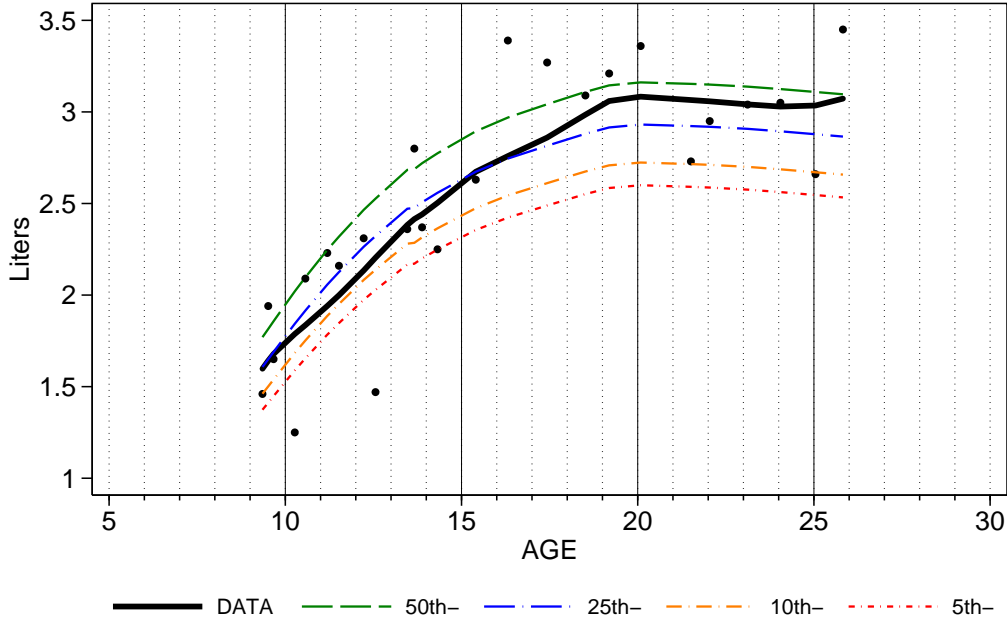

1117

**PATTERN OF GROWTH/DECLINE (Check One)**

- ( 1) Normal Growth
- ( 2) Normal Growth, Early Decline
- ( 3) Reduced Growth
- ( 4) Reduced Growth, Early Decline
- ( 9) Undetermined Pattern
- ( 8) Undetermined - not enough data

Maximum lung growth attained: ( 1) Yes ( 0) No

Plateau started: ( 2) No plateau ( 1) Yes ( 0) No

Decline started: ( 1) Yes ( 0) No

AGE AT each of the following periods (use '99' if N/A):

Maximum Lung Growth: \_\_\_\_ . \_\_\_\_

Start of Plateau: \_\_\_\_ . \_\_\_\_

Start of Decline: \_\_\_\_ . \_\_\_\_

### Pre-BD FEV1 Data and Percentiles: 1118

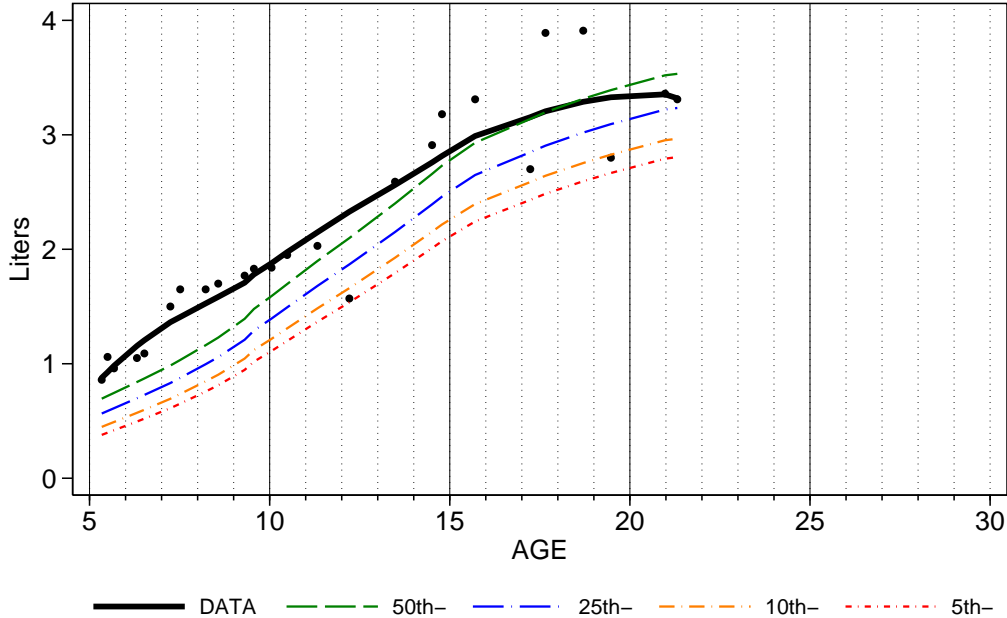

1118

**PATTERN OF GROWTH/DECLINE (Check One)**

- ( 1) Normal Growth
- ( 2) Normal Growth, Early Decline
- ( 3) Reduced Growth
- ( 4) Reduced Growth, Early Decline
- ( 9) Undetermined Pattern
- ( 8) Undetermined - not enough data

Maximum lung growth attained: ( 1) Yes ( 0) No

Plateau started: ( 2) No plateau ( 1) Yes ( 0) No

Decline started: ( 1) Yes ( 0) No

AGE AT each of the following periods (use '99' if N/A):

Maximum Lung Growth: \_\_\_\_ . \_\_\_\_

Start of Plateau: \_\_\_\_ . \_\_\_\_

Start of Decline: \_\_\_\_ . \_\_\_\_

### Pre-BD FEV1 Data and Percentiles: 1119

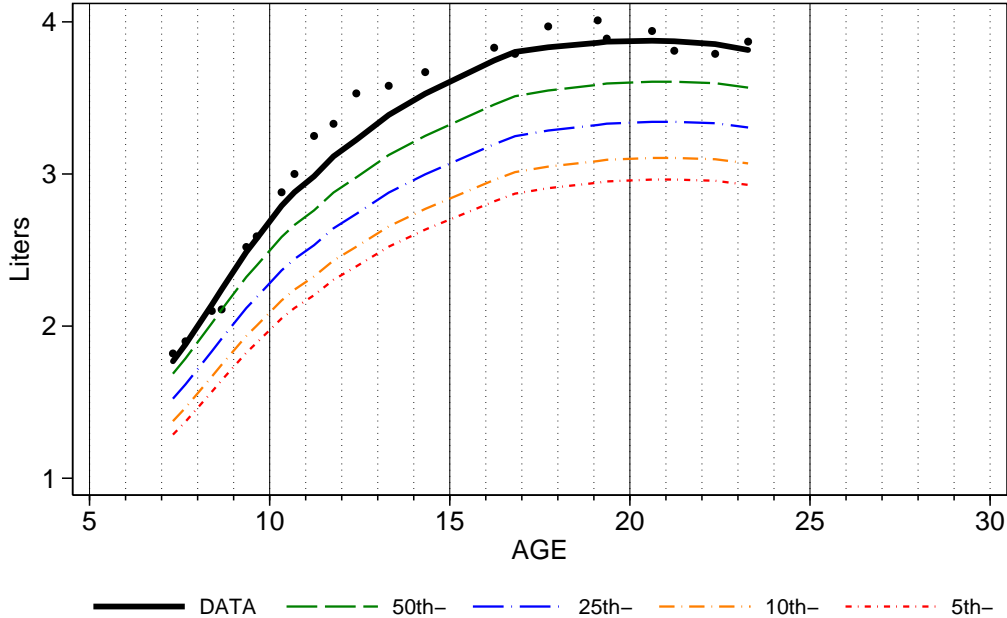

1119

**PATTERN OF GROWTH/DECLINE (Check One)**

- ( 1) Normal Growth
- ( 2) Normal Growth, Early Decline
- ( 3) Reduced Growth
- ( 4) Reduced Growth, Early Decline
- ( 9) Undetermined Pattern
- ( 8) Undetermined - not enough data

Maximum lung growth attained: ( 1) Yes ( 0) No

Plateau started: ( 2) No plateau ( 1) Yes ( 0) No

Decline started: ( 1) Yes ( 0) No

AGE AT each of the following periods (use '99' if N/A):

Maximum Lung Growth: \_\_\_\_ . \_\_\_\_

Start of Plateau: \_\_\_\_ . \_\_\_\_

Start of Decline: \_\_\_\_ . \_\_\_\_

### Pre-BD FEV1 Data and Percentiles: 1120

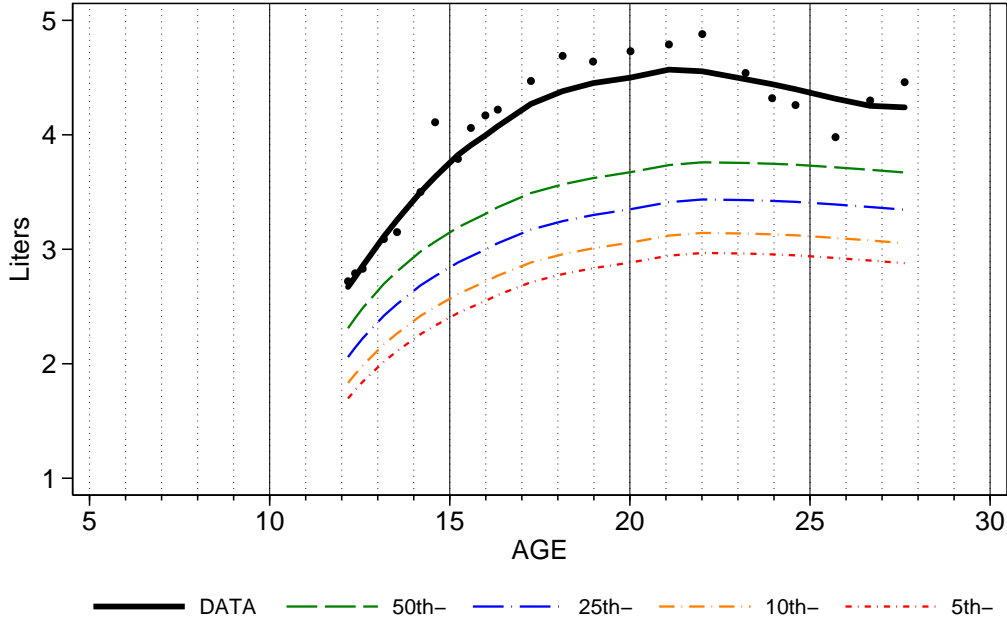

1120

**PATTERN OF GROWTH/DECLINE (Check One)**

- ( 1 ) Normal Growth
- ( 2 ) Normal Growth, Early Decline
- ( 3 ) Reduced Growth
- ( 4 ) Reduced Growth, Early Decline
- ( 9 ) Undetermined Pattern
- ( 8 ) Undetermined - not enough data

Maximum lung growth attained: ( 1 ) Yes ( 0 ) No

Plateau started: ( 2 ) No plateau ( 1 ) Yes ( 0 ) No

Decline started: ( 1 ) Yes ( 0 ) No

AGE AT each of the following periods (use '99' if N/A):

Maximum Lung Growth: \_\_\_\_ . \_\_\_\_

Start of Plateau: \_\_\_\_ . \_\_\_\_

Start of Decline: \_\_\_\_ . \_\_\_\_

### Pre-BD FEV1 Data and Percentiles: 1128

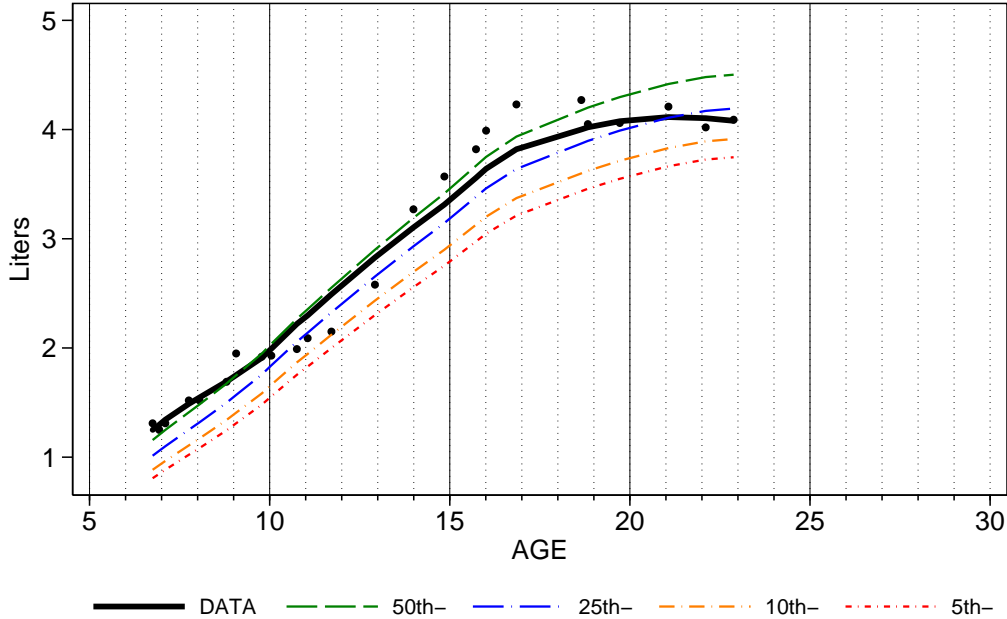

1128

**PATTERN OF GROWTH/DECLINE (Check One)**

- ( 1) Normal Growth
- ( 2) Normal Growth, Early Decline
- ( 3) Reduced Growth
- ( 4) Reduced Growth, Early Decline
- ( 9) Undetermined Pattern
- ( 8) Undetermined - not enough data

Maximum lung growth attained: ( 1) Yes ( 0) No

Plateau started: ( 2) No plateau ( 1) Yes ( 0) No

Decline started: ( 1) Yes ( 0) No

AGE AT each of the following periods (use '99' if N/A):

Maximum Lung Growth: \_\_\_\_ . \_\_\_\_

Start of Plateau: \_\_\_\_ . \_\_\_\_

Start of Decline: \_\_\_\_ . \_\_\_\_

### Pre-BD FEV1 Data and Percentiles: 1130

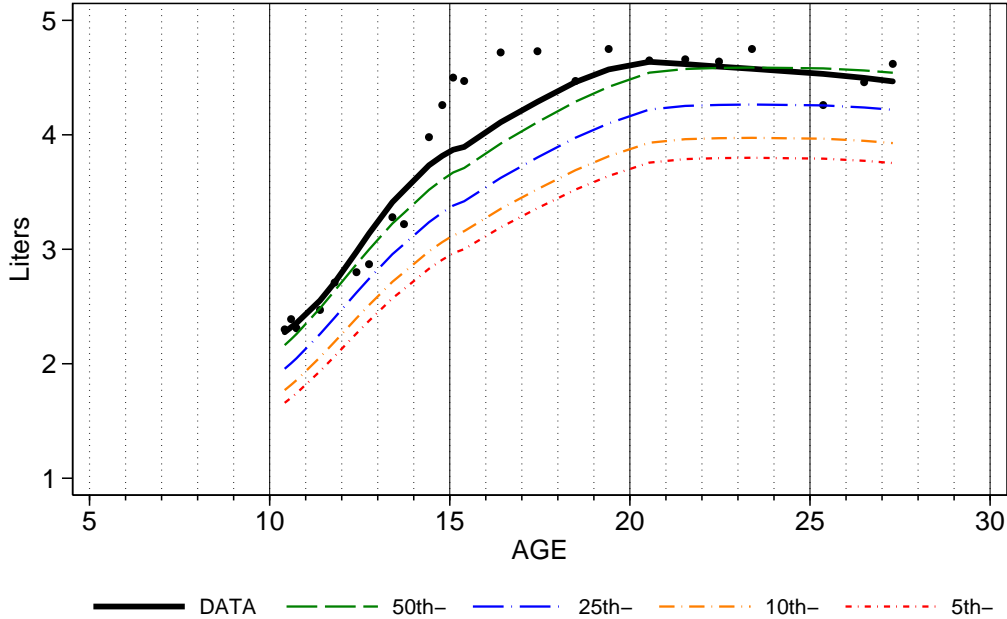

1130

**PATTERN OF GROWTH/DECLINE (Check One)**

- ( 1 ) Normal Growth
- ( 2 ) Normal Growth, Early Decline
- ( 3 ) Reduced Growth
- ( 4 ) Reduced Growth, Early Decline
- ( 9 ) Undetermined Pattern
- ( 8 ) Undetermined - not enough data

Maximum lung growth attained: ( 1 ) Yes ( 0 ) No

Plateau started: ( 2 ) No plateau ( 1 ) Yes ( 0 ) No

Decline started: ( 1 ) Yes ( 0 ) No

AGE AT each of the following periods (use '99' if N/A):

Maximum Lung Growth: \_\_\_\_ . \_\_\_\_

Start of Plateau: \_\_\_\_ . \_\_\_\_

Start of Decline: \_\_\_\_ . \_\_\_\_

### Pre-BD FEV1 Data and Percentiles: 1132

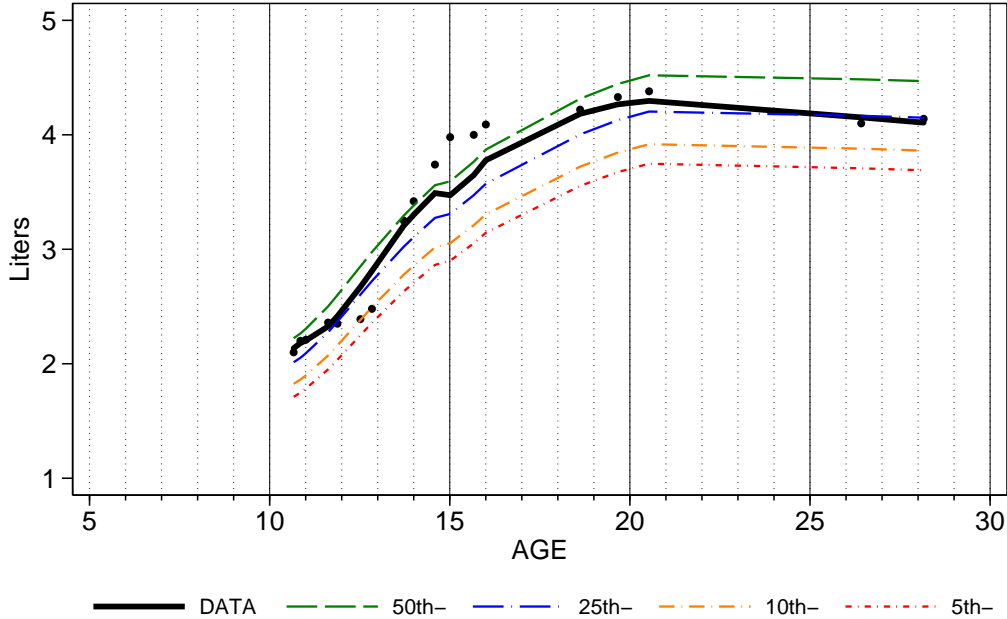

1132

**PATTERN OF GROWTH/DECLINE (Check One)**

- ( 1 ) Normal Growth
- ( 2 ) Normal Growth, Early Decline
- ( 3 ) Reduced Growth
- ( 4 ) Reduced Growth, Early Decline
- ( 9 ) Undetermined Pattern
- ( 8 ) Undetermined - not enough data

Maximum lung growth attained: ( 1 ) Yes ( 0 ) No

Plateau started: ( 2 ) No plateau ( 1 ) Yes ( 0 ) No

Decline started: ( 1 ) Yes ( 0 ) No

AGE AT each of the following periods (use '99' if N/A):

Maximum Lung Growth: \_\_\_\_ . \_\_\_\_

Start of Plateau: \_\_\_\_ . \_\_\_\_

Start of Decline: \_\_\_\_ . \_\_\_\_

### Pre-BD FEV1 Data and Percentiles: 1134

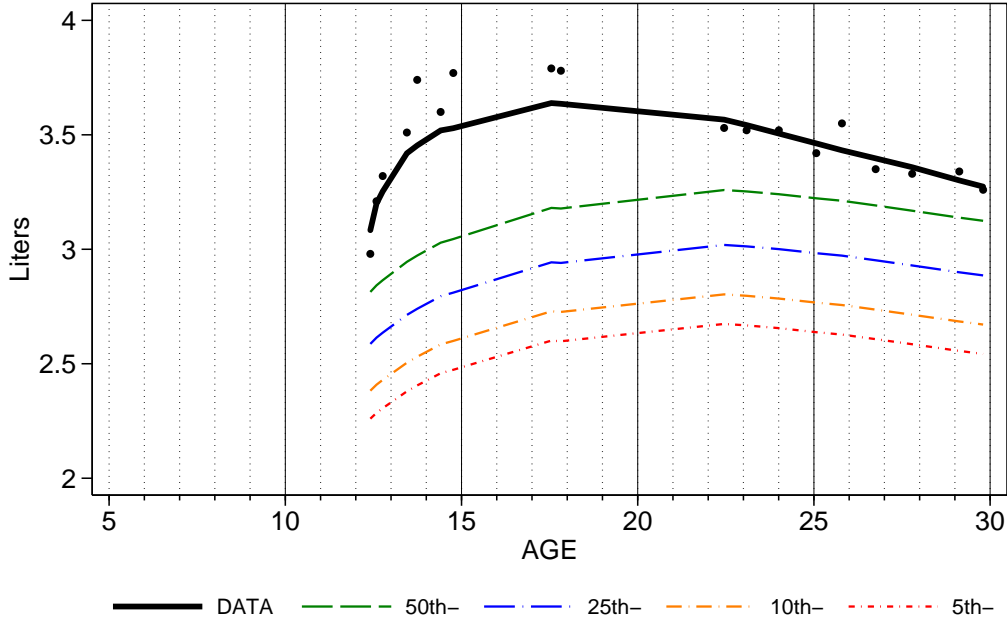

1134

**PATTERN OF GROWTH/DECLINE (Check One)**

- ( 1) Normal Growth
- ( 2) Normal Growth, Early Decline
- ( 3) Reduced Growth
- ( 4) Reduced Growth, Early Decline
- ( 9) Undetermined Pattern
- ( 8) Undetermined - not enough data

Maximum lung growth attained: ( 1) Yes ( 0) No

Plateau started: ( 2) No plateau ( 1) Yes ( 0) No

Decline started: ( 1) Yes ( 0) No

AGE AT each of the following periods (use '99' if N/A):

Maximum Lung Growth: \_\_\_\_ . \_\_\_\_

Start of Plateau: \_\_\_\_ . \_\_\_\_

Start of Decline: \_\_\_\_ . \_\_\_\_



### Pre-BD FEV1 Data and Percentiles: 1147

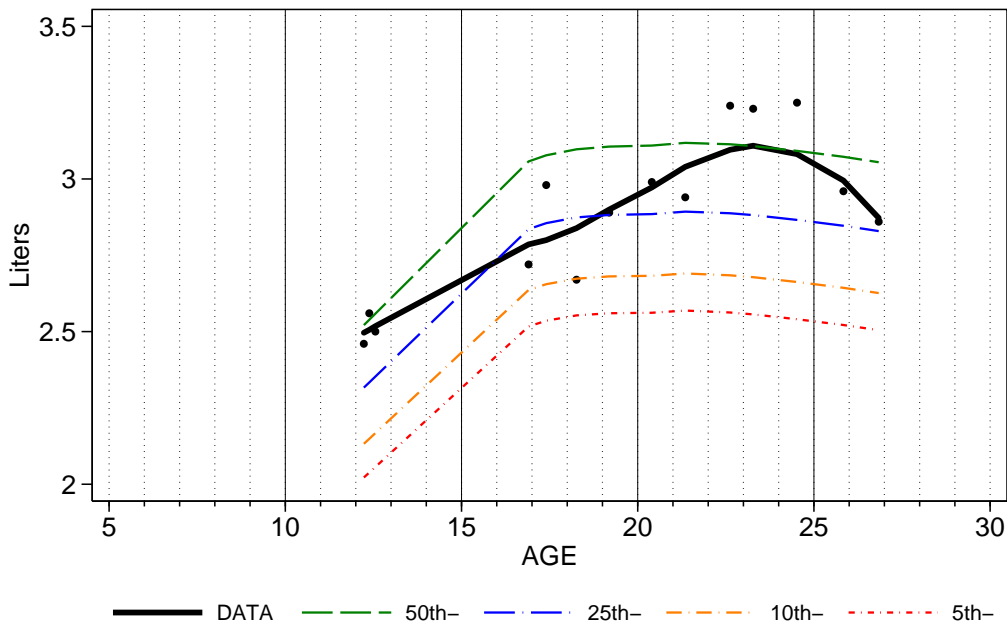

1147

**PATTERN OF GROWTH/DECLINE (Check One)**

- ( 1) Normal Growth
- ( 2) Normal Growth, Early Decline
- ( 3) Reduced Growth
- ( 4) Reduced Growth, Early Decline
- ( 9) Undetermined Pattern
- ( 8) Undetermined - not enough data

Maximum lung growth attained: ( 1) Yes ( 0) No

Plateau started: ( 2) No plateau ( 1) Yes ( 0) No

Decline started: ( 1) Yes ( 0) No

AGE AT each of the following periods (use '99' if N/A):

Maximum Lung Growth: \_\_\_\_ . \_\_\_\_

Start of Plateau: \_\_\_\_ . \_\_\_\_

Start of Decline: \_\_\_\_ . \_\_\_\_

### Pre-BD FEV1 Data and Percentiles: 1151

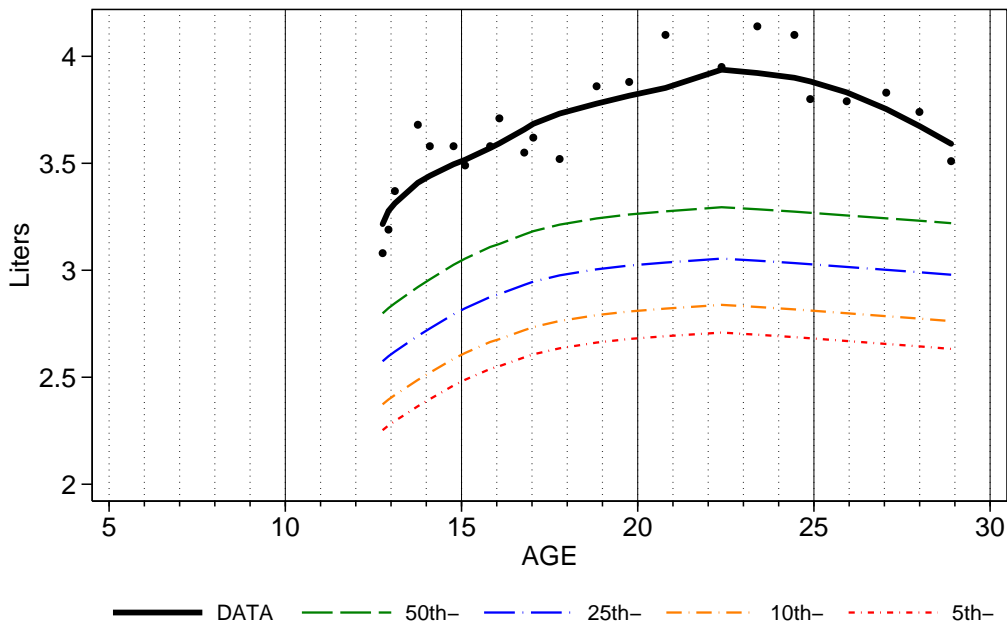

1151

**PATTERN OF GROWTH/DECLINE (Check One)**

- ( 1) Normal Growth
- ( 2) Normal Growth, Early Decline
- ( 3) Reduced Growth
- ( 4) Reduced Growth, Early Decline
- ( 9) Undetermined Pattern
- ( 8) Undetermined - not enough data

Maximum lung growth attained: ( 1) Yes ( 0) No

Plateau started: ( 2) No plateau ( 1) Yes ( 0) No

Decline started: ( 1) Yes ( 0) No

AGE AT each of the following periods (use '99' if N/A):

Maximum Lung Growth: \_\_\_\_ . \_\_\_\_

Start of Plateau: \_\_\_\_ . \_\_\_\_

Start of Decline: \_\_\_\_ . \_\_\_\_

### Pre-BD FEV1 Data and Percentiles: 1155

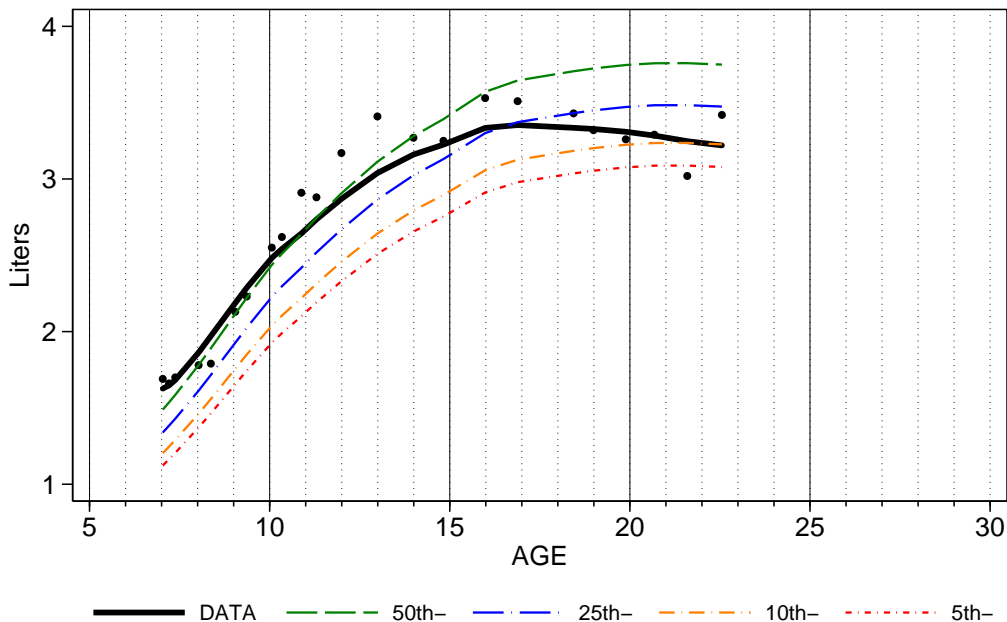

1155

**PATTERN OF GROWTH/DECLINE (Check One)**

- ( 1) Normal Growth
- ( 2) Normal Growth, Early Decline
- ( 3) Reduced Growth
- ( 4) Reduced Growth, Early Decline
- ( 9) Undetermined Pattern
- ( 8) Undetermined - not enough data

Maximum lung growth attained: ( 1) Yes ( 0) No

Plateau started: ( 2) No plateau ( 1) Yes ( 0) No

Decline started: ( 1) Yes ( 0) No

AGE AT each of the following periods (use '99' if N/A):

Maximum Lung Growth: \_\_\_\_ . \_\_\_\_

Start of Plateau: \_\_\_\_ . \_\_\_\_

Start of Decline: \_\_\_\_ . \_\_\_\_

### Pre-BD FEV1 Data and Percentiles: 1166

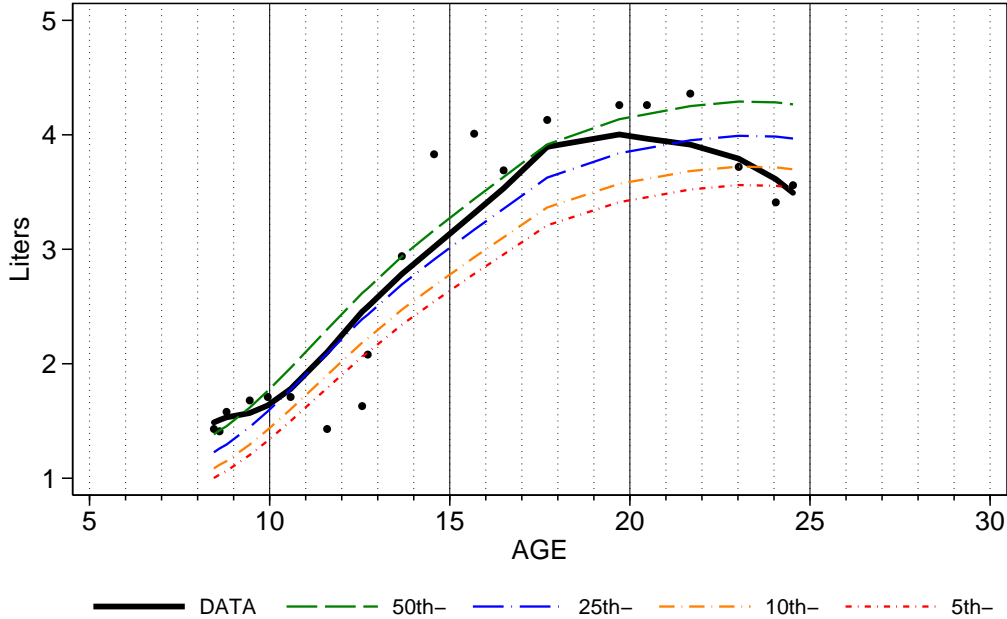

1166

**PATTERN OF GROWTH/DECLINE (Check One)**

- ( 1 ) Normal Growth
- ( 2 ) Normal Growth, Early Decline
- ( 3 ) Reduced Growth
- ( 4 ) Reduced Growth, Early Decline
- ( 9 ) Undetermined Pattern
- ( 8 ) Undetermined - not enough data

Maximum lung growth attained: ( 1 ) Yes ( 0 ) No

Plateau started: ( 2 ) No plateau ( 1 ) Yes ( 0 ) No

Decline started: ( 1 ) Yes ( 0 ) No

AGE AT each of the following periods (use '99' if N/A):

Maximum Lung Growth: \_\_\_\_ . \_\_\_\_

Start of Plateau: \_\_\_\_ . \_\_\_\_

Start of Decline: \_\_\_\_ . \_\_\_\_

### Pre-BD FEV1 Data and Percentiles: 1173

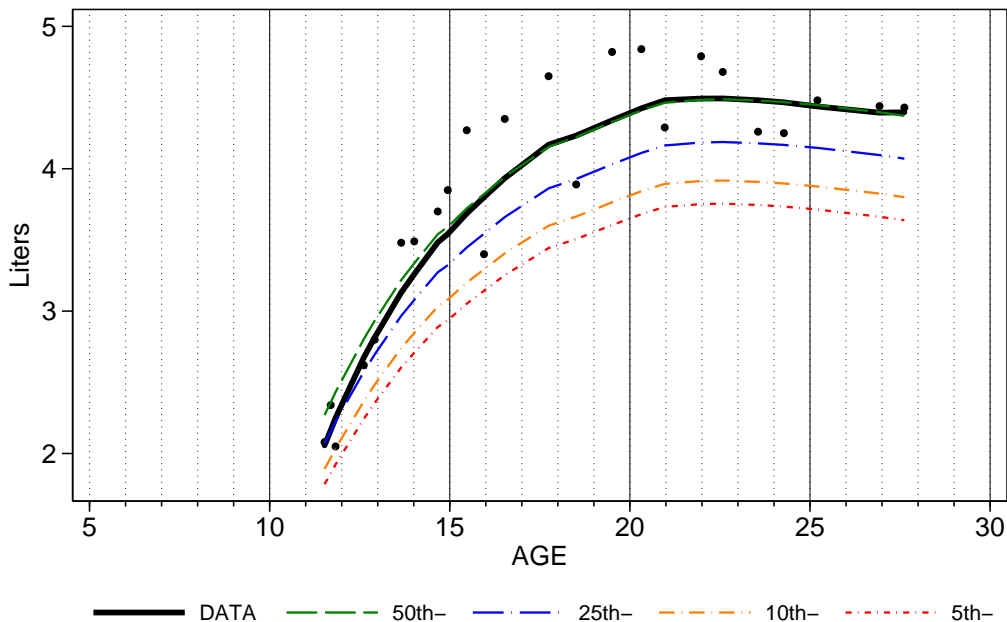

1173

**PATTERN OF GROWTH/DECLINE (Check One)**

- ( 1 ) Normal Growth
- ( 2 ) Normal Growth, Early Decline
- ( 3 ) Reduced Growth
- ( 4 ) Reduced Growth, Early Decline
- ( 9 ) Undetermined Pattern
- ( 8 ) Undetermined - not enough data

Maximum lung growth attained: ( 1 ) Yes ( 0 ) No

Plateau started: ( 2 ) No plateau ( 1 ) Yes ( 0 ) No

Decline started: ( 1 ) Yes ( 0 ) No

AGE AT each of the following periods (use '99' if N/A):

Maximum Lung Growth: \_\_\_\_ . \_\_\_\_

Start of Plateau: \_\_\_\_ . \_\_\_\_

Start of Decline: \_\_\_\_ . \_\_\_\_

### Pre-BD FEV1 Data and Percentiles: 1175

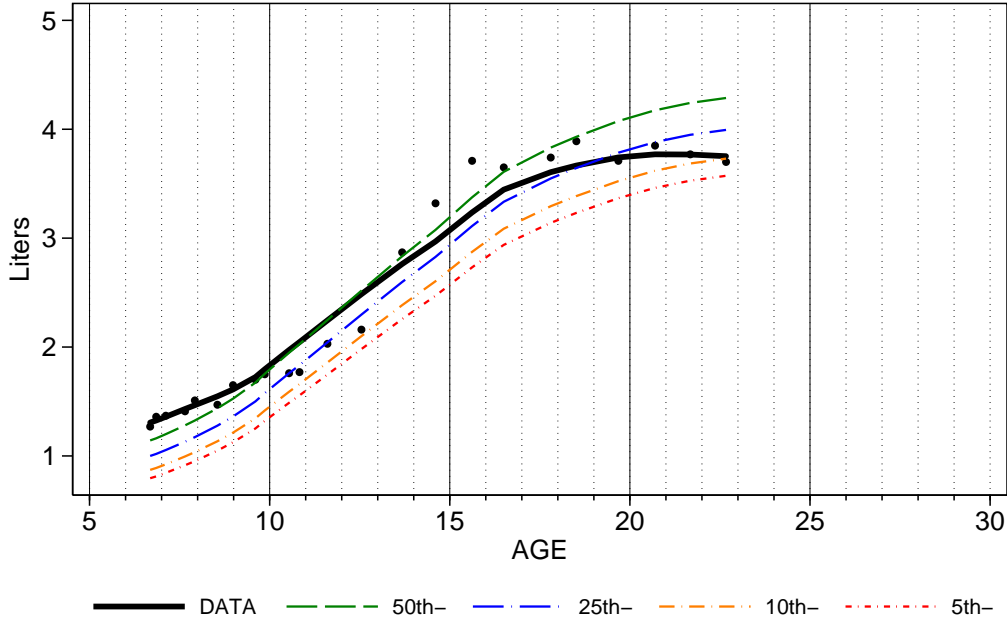

1175

**PATTERN OF GROWTH/DECLINE (Check One)**

- ( 1 ) Normal Growth
- ( 2 ) Normal Growth, Early Decline
- ( 3 ) Reduced Growth
- ( 4 ) Reduced Growth, Early Decline
- ( 9 ) Undetermined Pattern
- ( 8 ) Undetermined - not enough data

Maximum lung growth attained: ( 1 ) Yes ( 0 ) No

Plateau started: ( 2 ) No plateau ( 1 ) Yes ( 0 ) No

Decline started: ( 1 ) Yes ( 0 ) No

AGE AT each of the following periods (use '99' if N/A):

Maximum Lung Growth: \_\_\_\_ . \_\_\_\_

Start of Plateau: \_\_\_\_ . \_\_\_\_

Start of Decline: \_\_\_\_ . \_\_\_\_

### Pre-BD FEV1 Data and Percentiles: 1191

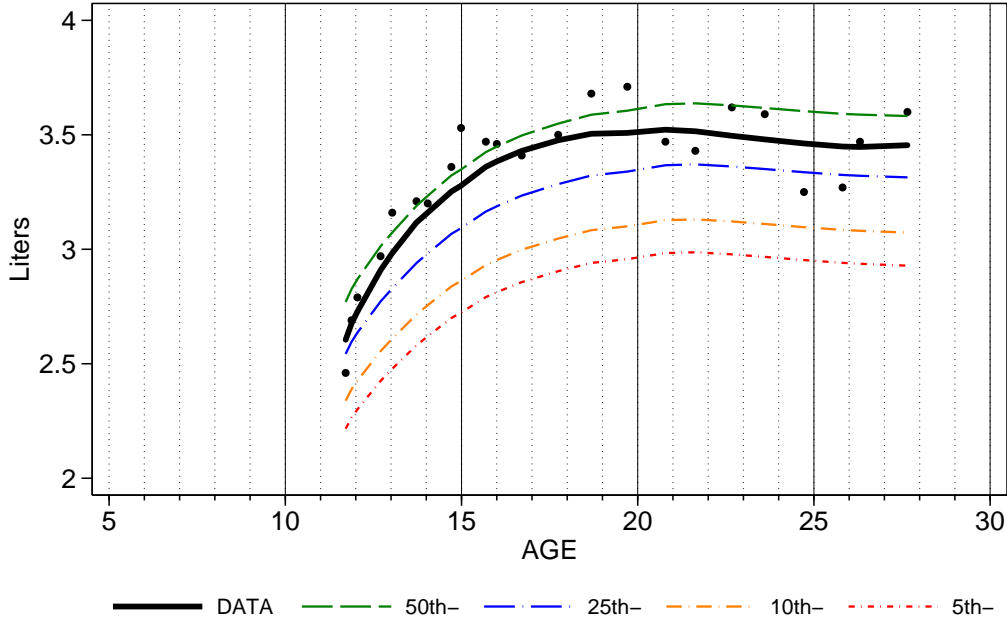

1191

**PATTERN OF GROWTH/DECLINE (Check One)**

- ( 1 ) Normal Growth
- ( 2 ) Normal Growth, Early Decline
- ( 3 ) Reduced Growth
- ( 4 ) Reduced Growth, Early Decline
- ( 9 ) Undetermined Pattern
- ( 8 ) Undetermined - not enough data

Maximum lung growth attained: ( 1 ) Yes ( 0 ) No

Plateau started: ( 2 ) No plateau ( 1 ) Yes ( 0 ) No

Decline started: ( 1 ) Yes ( 0 ) No

AGE AT each of the following periods (use '99' if N/A):

Maximum Lung Growth: \_\_\_\_ . \_\_\_\_

Start of Plateau: \_\_\_\_ . \_\_\_\_

Start of Decline: \_\_\_\_ . \_\_\_\_

### Pre-BD FEV1 Data and Percentiles: 1193

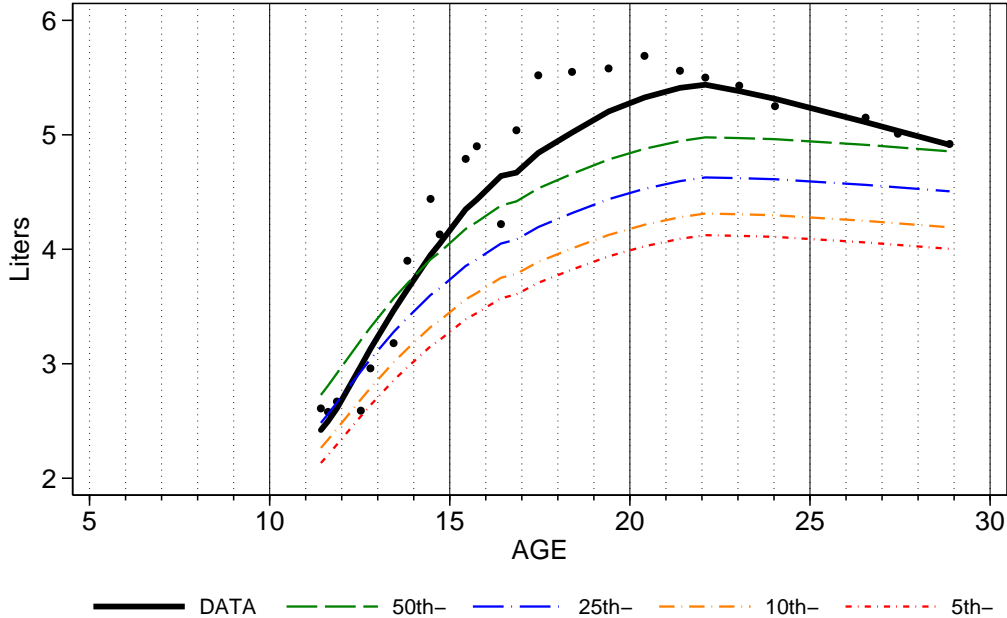

1193

**PATTERN OF GROWTH/DECLINE (Check One)**

- ( 1) Normal Growth
- ( 2) Normal Growth, Early Decline
- ( 3) Reduced Growth
- ( 4) Reduced Growth, Early Decline
- ( 9) Undetermined Pattern
- ( 8) Undetermined - not enough data

Maximum lung growth attained: ( 1) Yes ( 0) No

Plateau started: ( 2) No plateau ( 1) Yes ( 0) No

Decline started: ( 1) Yes ( 0) No

AGE AT each of the following periods (use '99' if N/A):

Maximum Lung Growth: \_\_\_\_ . \_\_\_\_

Start of Plateau: \_\_\_\_ . \_\_\_\_

Start of Decline: \_\_\_\_ . \_\_\_\_



### Pre-BD FEV1 Data and Percentiles: 1194

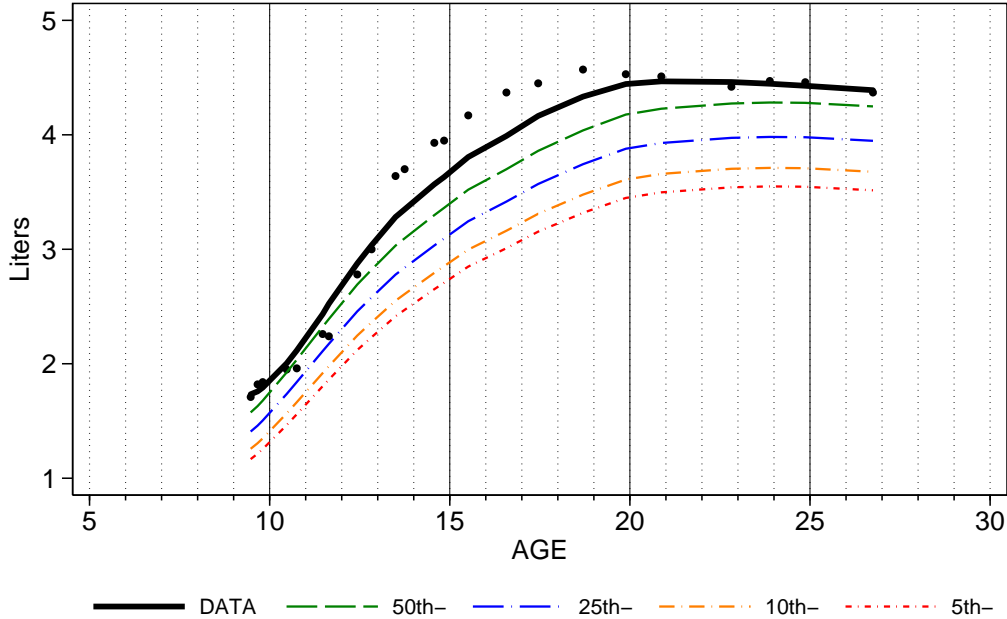

1194

**PATTERN OF GROWTH/DECLINE (Check One)**

- ( 1) Normal Growth
- ( 2) Normal Growth, Early Decline
- ( 3) Reduced Growth
- ( 4) Reduced Growth, Early Decline
- ( 9) Undetermined Pattern
- ( 8) Undetermined - not enough data

Maximum lung growth attained: ( 1) Yes ( 0) No

Plateau started: ( 2) No plateau ( 1) Yes ( 0) No

Decline started: ( 1) Yes ( 0) No

AGE AT each of the following periods (use '99' if N/A):

Maximum Lung Growth: \_\_\_\_ . \_\_\_\_

Start of Plateau: \_\_\_\_ . \_\_\_\_

Start of Decline: \_\_\_\_ . \_\_\_\_

### Pre-BD FEV1 Data and Percentiles: 1197

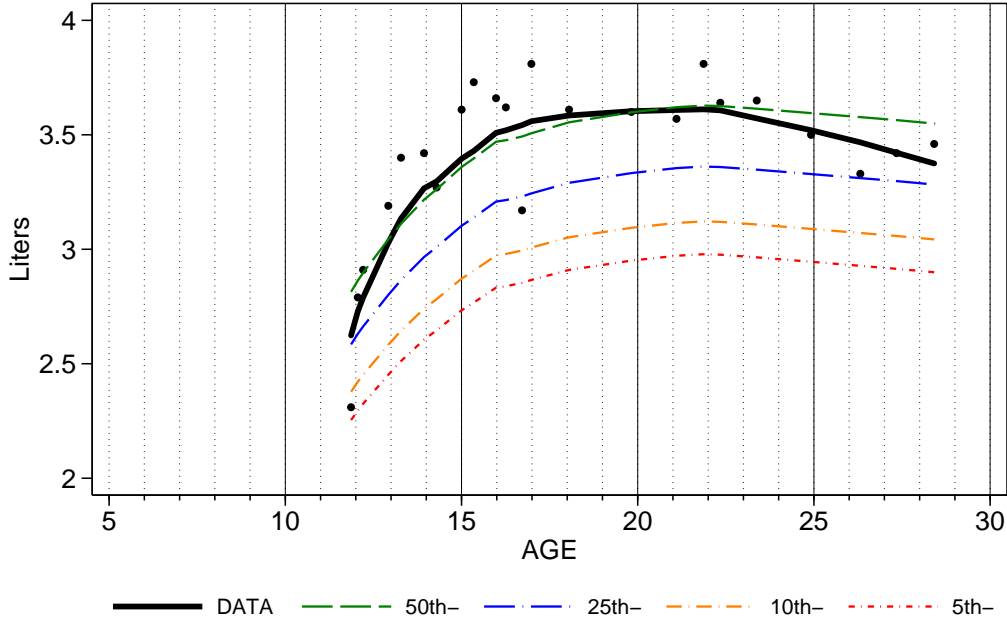

1197

**PATTERN OF GROWTH/DECLINE (Check One)**

- ( 1) Normal Growth
- ( 2) Normal Growth, Early Decline
- ( 3) Reduced Growth
- ( 4) Reduced Growth, Early Decline
- ( 9) Undetermined Pattern
- ( 8) Undetermined - not enough data

Maximum lung growth attained: ( 1) Yes ( 0) No

Plateau started: ( 2) No plateau ( 1) Yes ( 0) No

Decline started: ( 1) Yes ( 0) No

AGE AT each of the following periods (use '99' if N/A):

Maximum Lung Growth: \_\_\_\_ . \_\_\_\_

Start of Plateau: \_\_\_\_ . \_\_\_\_

Start of Decline: \_\_\_\_ . \_\_\_\_

### Pre-BD FEV1 Data and Percentiles: 1203

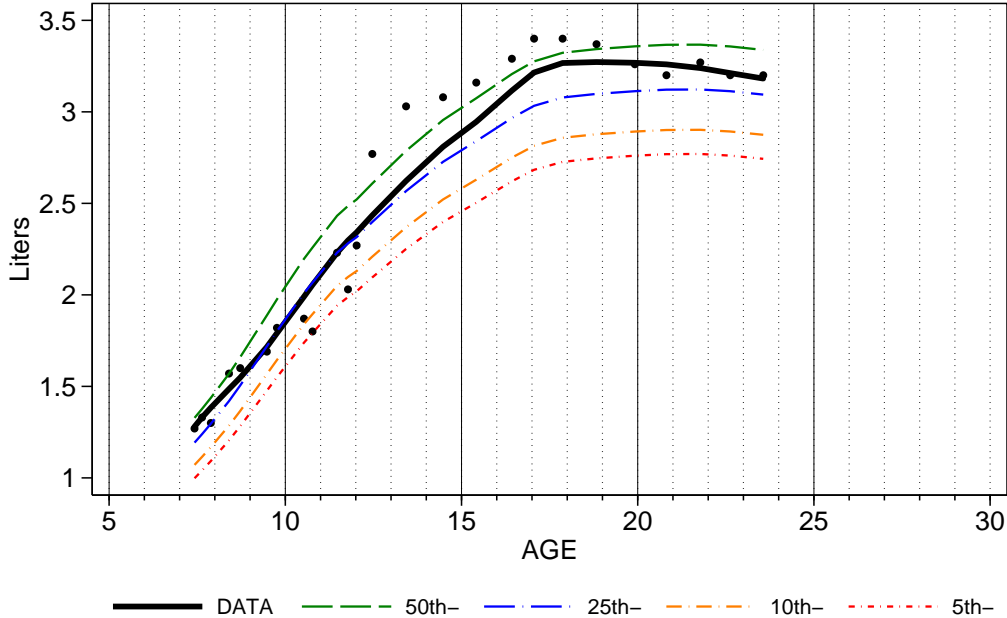

1203

**PATTERN OF GROWTH/DECLINE (Check One)**

- ( 1) Normal Growth
- ( 2) Normal Growth, Early Decline
- ( 3) Reduced Growth
- ( 4) Reduced Growth, Early Decline
- ( 9) Undetermined Pattern
- ( 8) Undetermined - not enough data

Maximum lung growth attained: ( 1) Yes ( 0) No

Plateau started: ( 2) No plateau ( 1) Yes ( 0) No

Decline started: ( 1) Yes ( 0) No

AGE AT each of the following periods (use '99' if N/A):

Maximum Lung Growth: \_\_\_\_ . \_\_\_\_

Start of Plateau: \_\_\_\_ . \_\_\_\_

Start of Decline: \_\_\_\_ . \_\_\_\_

### Pre-BD FEV1 Data and Percentiles: 1205

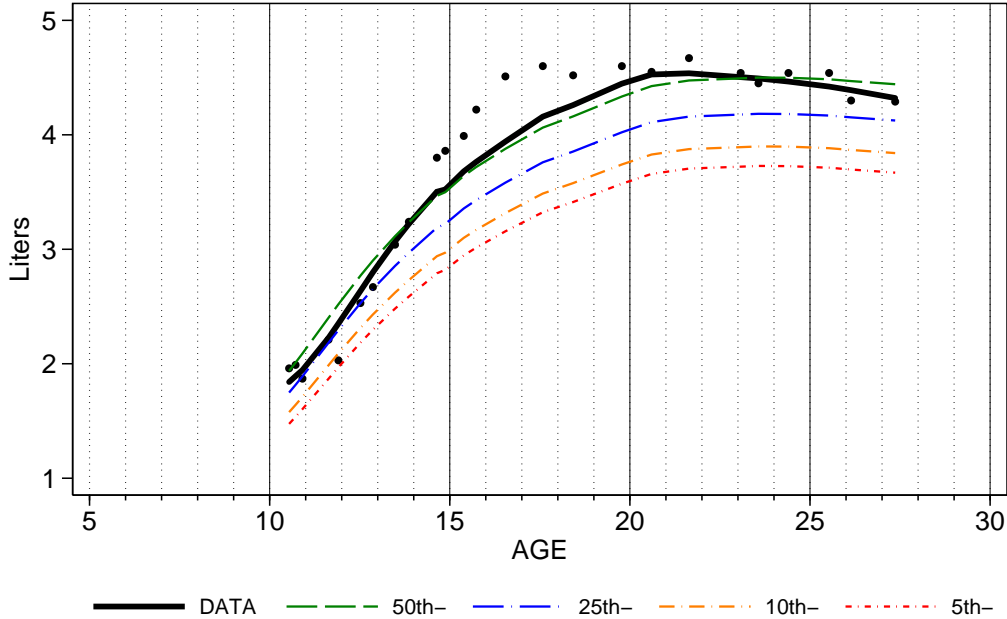

1205

**PATTERN OF GROWTH/DECLINE (Check One)**

- ( 1 ) Normal Growth
- ( 2 ) Normal Growth, Early Decline
- ( 3 ) Reduced Growth
- ( 4 ) Reduced Growth, Early Decline
- ( 9 ) Undetermined Pattern
- ( 8 ) Undetermined - not enough data

Maximum lung growth attained: ( 1 ) Yes ( 0 ) No

Plateau started: ( 2 ) No plateau ( 1 ) Yes ( 0 ) No

Decline started: ( 1 ) Yes ( 0 ) No

AGE AT each of the following periods (use '99' if N/A):

Maximum Lung Growth: \_\_\_\_ . \_\_\_\_

Start of Plateau: \_\_\_\_ . \_\_\_\_

Start of Decline: \_\_\_\_ . \_\_\_\_

### Pre-BD FEV1 Data and Percentiles: 1207

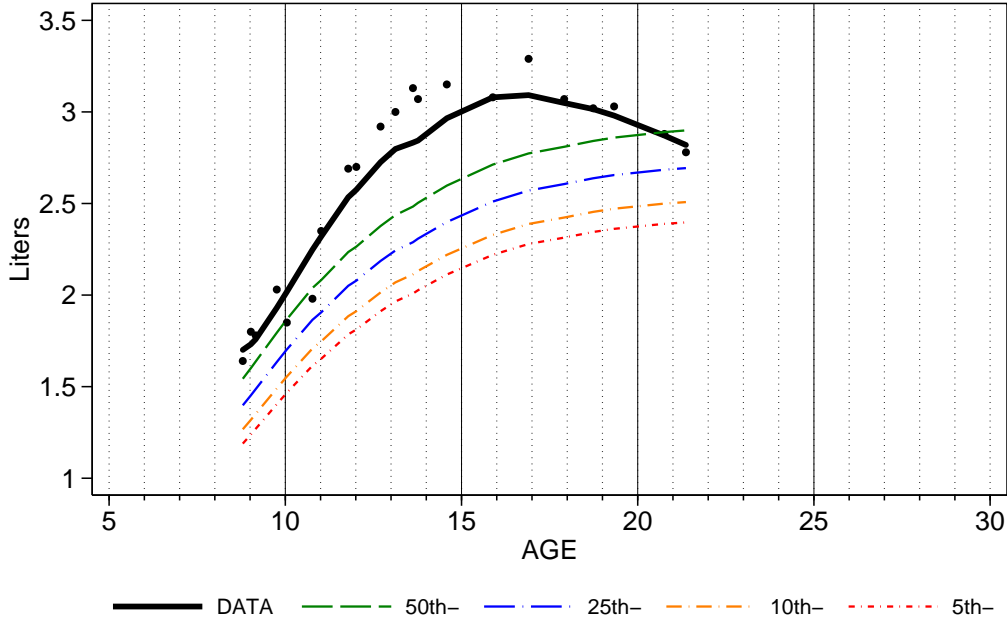

1207

**PATTERN OF GROWTH/DECLINE (Check One)**

- ( 1 ) Normal Growth
- ( 2 ) Normal Growth, Early Decline
- ( 3 ) Reduced Growth
- ( 4 ) Reduced Growth, Early Decline
- ( 9 ) Undetermined Pattern
- ( 8 ) Undetermined - not enough data

Maximum lung growth attained: ( 1 ) Yes ( 0 ) No

Plateau started: ( 2 ) No plateau ( 1 ) Yes ( 0 ) No

Decline started: ( 1 ) Yes ( 0 ) No

AGE AT each of the following periods (use '99' if N/A):

Maximum Lung Growth: \_\_\_\_ . \_\_\_\_

Start of Plateau: \_\_\_\_ . \_\_\_\_

Start of Decline: \_\_\_\_ . \_\_\_\_

### Pre-BD FEV1 Data and Percentiles: 1212

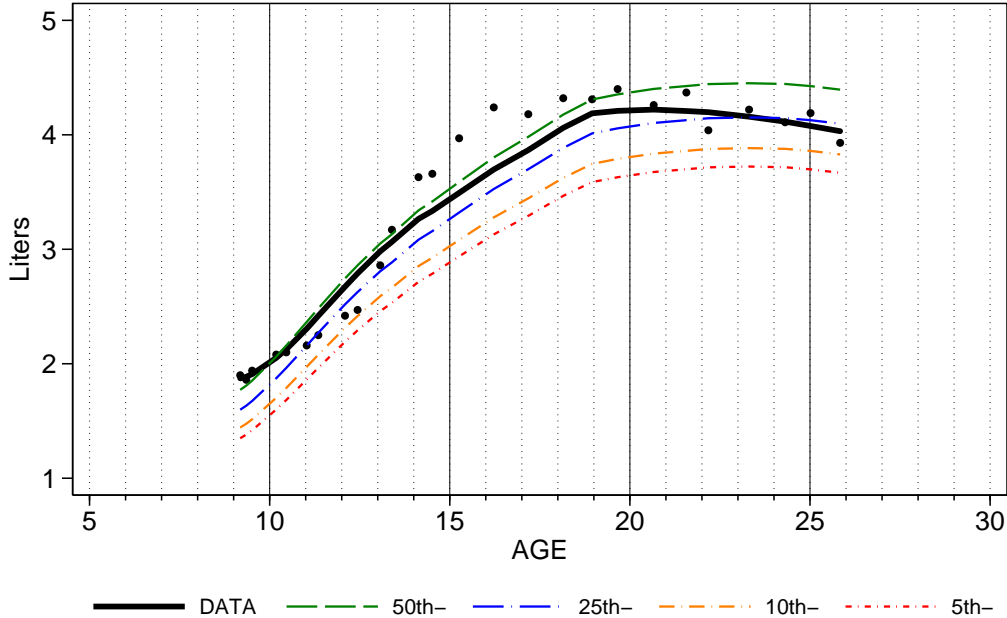

1212

**PATTERN OF GROWTH/DECLINE (Check One)**

- ( 1 ) Normal Growth
- ( 2 ) Normal Growth, Early Decline
- ( 3 ) Reduced Growth
- ( 4 ) Reduced Growth, Early Decline
- ( 9 ) Undetermined Pattern
- ( 8 ) Undetermined - not enough data

Maximum lung growth attained: ( 1 ) Yes ( 0 ) No

Plateau started: ( 2 ) No plateau ( 1 ) Yes ( 0 ) No

Decline started: ( 1 ) Yes ( 0 ) No

AGE AT each of the following periods (use '99' if N/A):

Maximum Lung Growth: \_\_\_\_ . \_\_\_\_

Start of Plateau: \_\_\_\_ . \_\_\_\_

Start of Decline: \_\_\_\_ . \_\_\_\_

### Pre-BD FEV1 Data and Percentiles: 1213

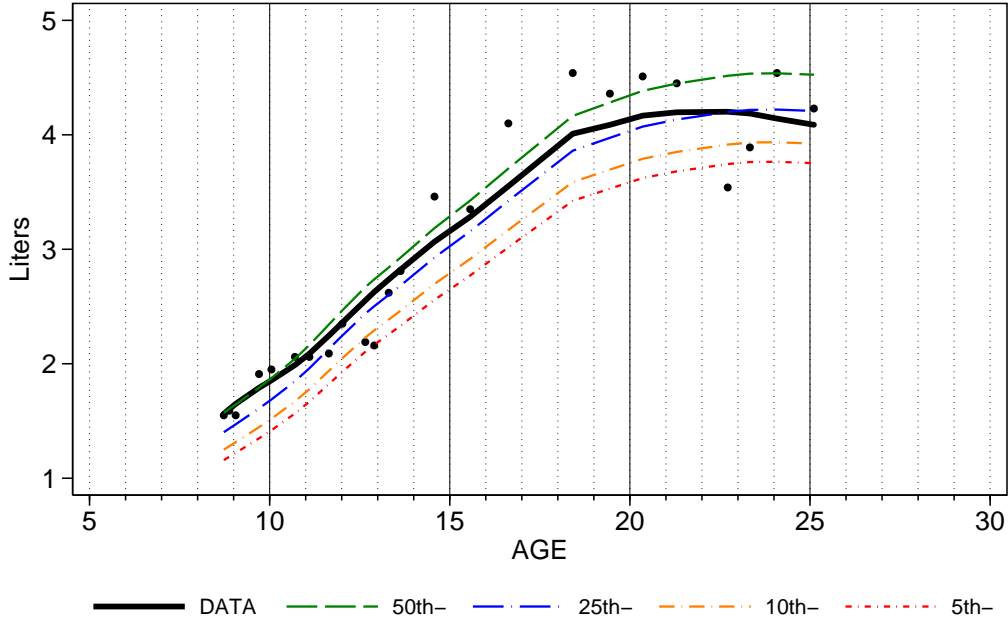

1213

**PATTERN OF GROWTH/DECLINE (Check One)**

- ( 1 ) Normal Growth
- ( 2 ) Normal Growth, Early Decline
- ( 3 ) Reduced Growth
- ( 4 ) Reduced Growth, Early Decline
- ( 9 ) Undetermined Pattern
- ( 8 ) Undetermined - not enough data

Maximum lung growth attained: ( 1 ) Yes ( 0 ) No

Plateau started: ( 2 ) No plateau ( 1 ) Yes ( 0 ) No

Decline started: ( 1 ) Yes ( 0 ) No

AGE AT each of the following periods (use '99' if N/A):

Maximum Lung Growth: \_\_\_\_ . \_\_\_\_

Start of Plateau: \_\_\_\_ . \_\_\_\_

Start of Decline: \_\_\_\_ . \_\_\_\_

### Pre-BD FEV1 Data and Percentiles: 1215

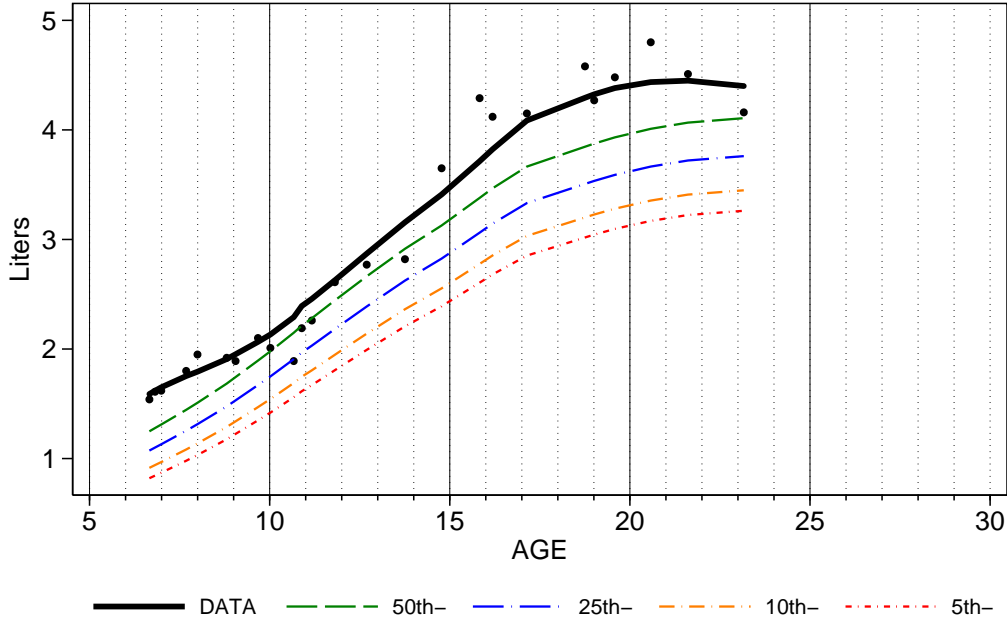

1215

**PATTERN OF GROWTH/DECLINE (Check One)**

- ( 1 ) Normal Growth
- ( 2 ) Normal Growth, Early Decline
- ( 3 ) Reduced Growth
- ( 4 ) Reduced Growth, Early Decline
- ( 9 ) Undetermined Pattern
- ( 8 ) Undetermined - not enough data

Maximum lung growth attained: ( 1 ) Yes ( 0 ) No

Plateau started: ( 2 ) No plateau ( 1 ) Yes ( 0 ) No

Decline started: ( 1 ) Yes ( 0 ) No

AGE AT each of the following periods (use '99' if N/A):

Maximum Lung Growth: \_\_\_\_ . \_\_\_\_

Start of Plateau: \_\_\_\_ . \_\_\_\_

Start of Decline: \_\_\_\_ . \_\_\_\_



### Pre-BD FEV1 Data and Percentiles: 1218

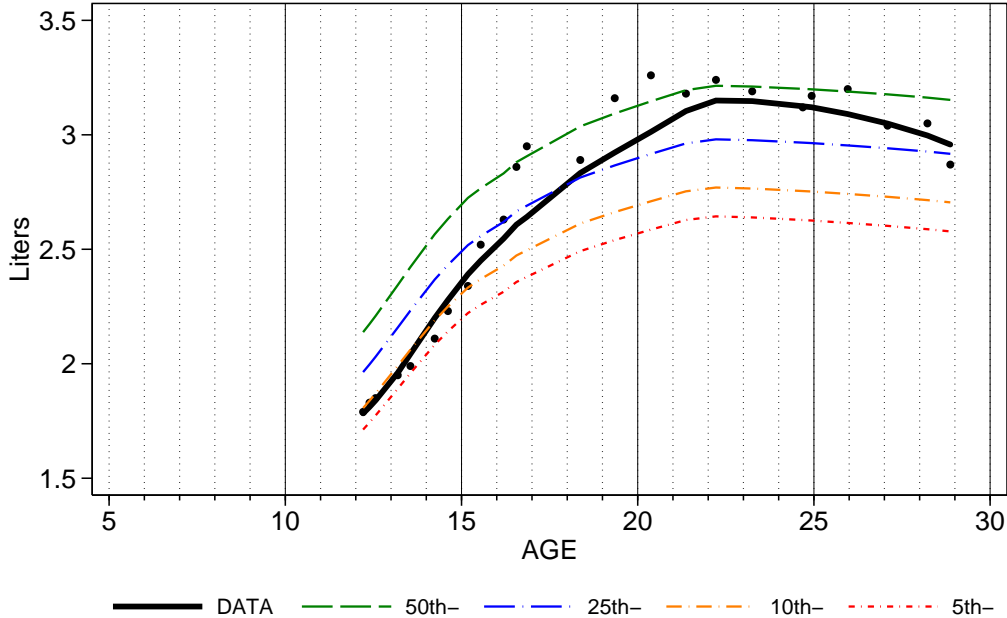

1218

**PATTERN OF GROWTH/DECLINE (Check One)**

- ( 1) Normal Growth
- ( 2) Normal Growth, Early Decline
- ( 3) Reduced Growth
- ( 4) Reduced Growth, Early Decline
- ( 9) Undetermined Pattern
- ( 8) Undetermined - not enough data

Maximum lung growth attained: ( 1) Yes ( 0) No

Plateau started: ( 2) No plateau ( 1) Yes ( 0) No

Decline started: ( 1) Yes ( 0) No

AGE AT each of the following periods (use '99' if N/A):

Maximum Lung Growth: \_\_\_\_ . \_\_\_\_

Start of Plateau: \_\_\_\_ . \_\_\_\_

Start of Decline: \_\_\_\_ . \_\_\_\_

### Pre-BD FEV1 Data and Percentiles: 1231

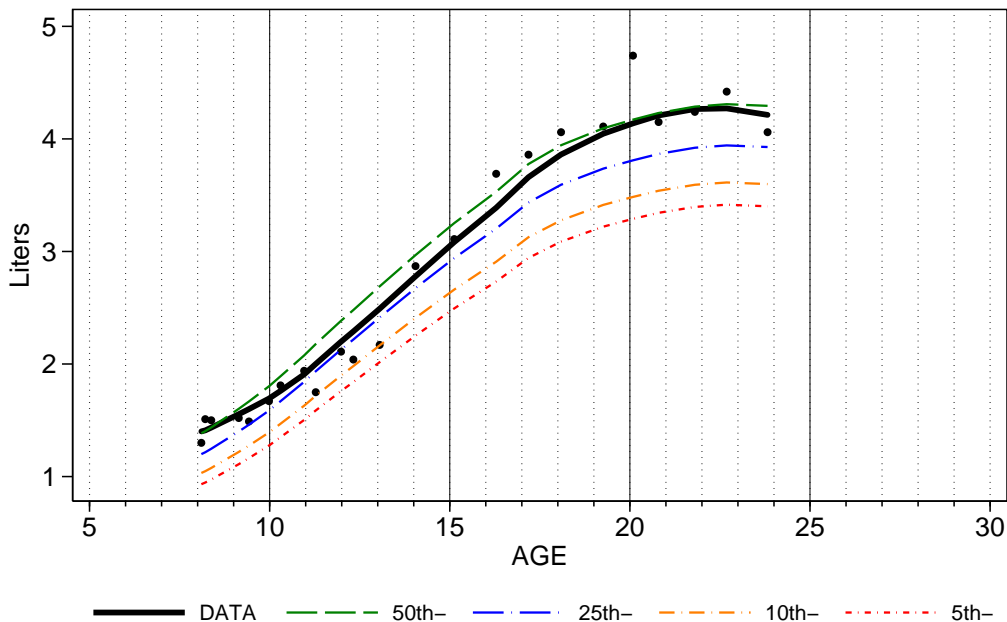

1231

**PATTERN OF GROWTH/DECLINE (Check One)**

- ( 1 ) Normal Growth
- ( 2 ) Normal Growth, Early Decline
- ( 3 ) Reduced Growth
- ( 4 ) Reduced Growth, Early Decline
- ( 9 ) Undetermined Pattern
- ( 8 ) Undetermined - not enough data

Maximum lung growth attained: ( 1 ) Yes ( 0 ) No

Plateau started: ( 2 ) No plateau ( 1 ) Yes ( 0 ) No

Decline started: ( 1 ) Yes ( 0 ) No

AGE AT each of the following periods (use '99' if N/A):

Maximum Lung Growth: \_\_\_\_ . \_\_\_\_

Start of Plateau: \_\_\_\_ . \_\_\_\_

Start of Decline: \_\_\_\_ . \_\_\_\_

### Pre-BD FEV1 Data and Percentiles: 1233

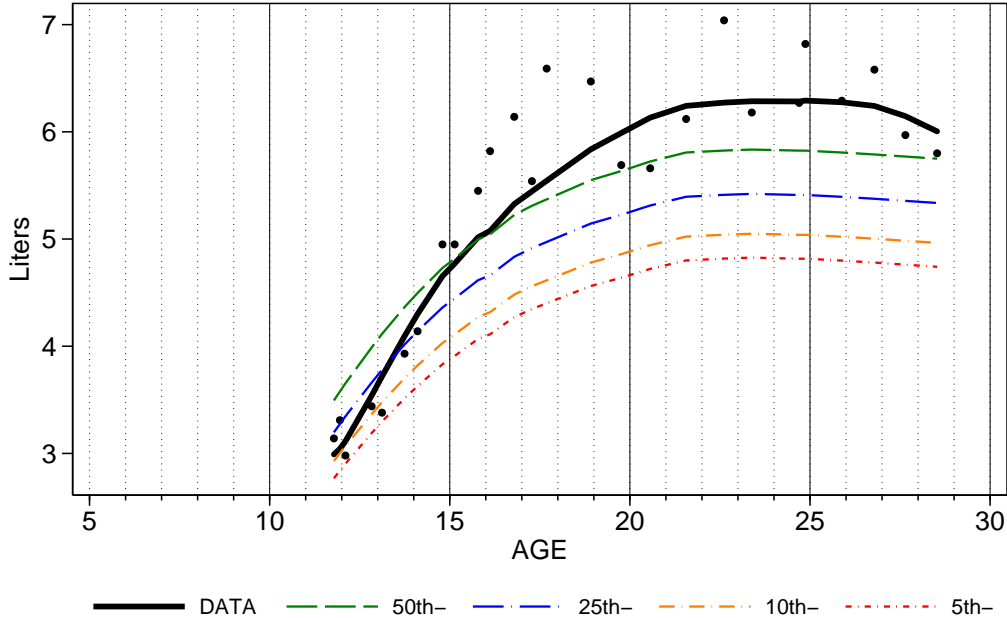

1233

**PATTERN OF GROWTH/DECLINE (Check One)**

- ( 1) Normal Growth
- ( 2) Normal Growth, Early Decline
- ( 3) Reduced Growth
- ( 4) Reduced Growth, Early Decline
- ( 9) Undetermined Pattern
- ( 8) Undetermined - not enough data

Maximum lung growth attained: ( 1) Yes ( 0) No

Plateau started: ( 2) No plateau ( 1) Yes ( 0) No

Decline started: ( 1) Yes ( 0) No

AGE AT each of the following periods (use '99' if N/A):

Maximum Lung Growth: \_\_\_\_ . \_\_\_\_

Start of Plateau: \_\_\_\_ . \_\_\_\_

Start of Decline: \_\_\_\_ . \_\_\_\_

### Pre-BD FEV1 Data and Percentiles: 1235

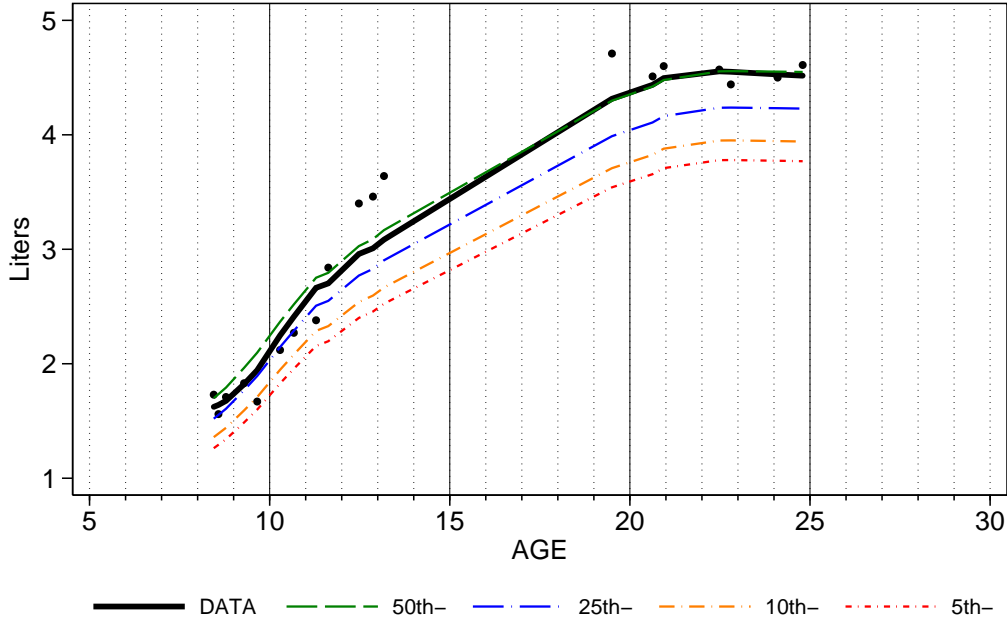

1235

**PATTERN OF GROWTH/DECLINE (Check One)**

- ( 1 ) Normal Growth
- ( 2 ) Normal Growth, Early Decline
- ( 3 ) Reduced Growth
- ( 4 ) Reduced Growth, Early Decline
- ( 9 ) Undetermined Pattern
- ( 8 ) Undetermined - not enough data

Maximum lung growth attained: ( 1 ) Yes ( 0 ) No

Plateau started: ( 2 ) No plateau ( 1 ) Yes ( 0 ) No

Decline started: ( 1 ) Yes ( 0 ) No

AGE AT each of the following periods (use '99' if N/A):

Maximum Lung Growth: \_\_\_\_ . \_\_\_\_

Start of Plateau: \_\_\_\_ . \_\_\_\_

Start of Decline: \_\_\_\_ . \_\_\_\_

### Pre-BD FEV1 Data and Percentiles: 1237

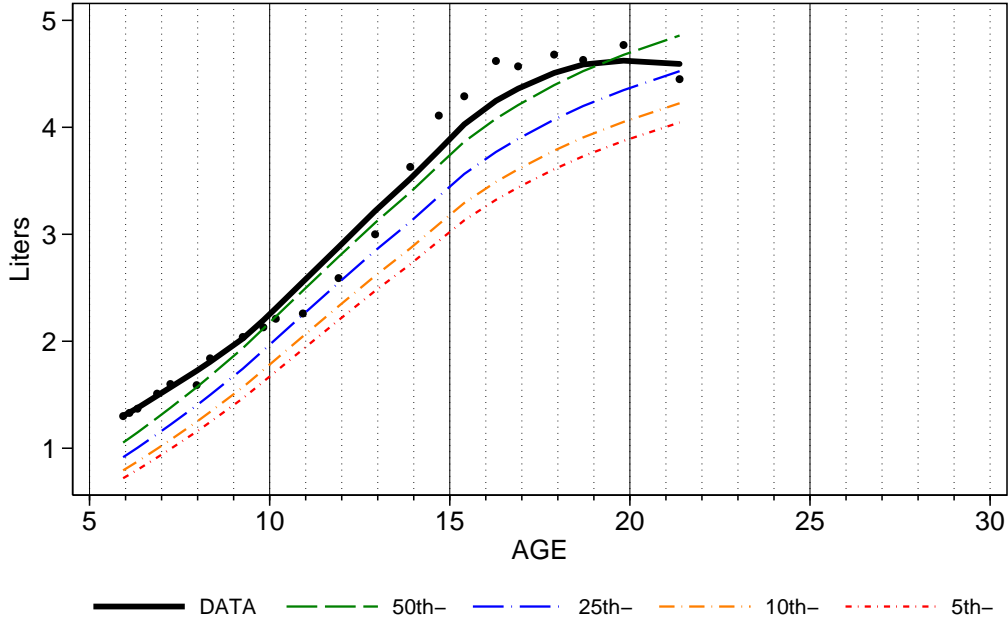

1237

**PATTERN OF GROWTH/DECLINE (Check One)**

- ( 1 ) Normal Growth
- ( 2 ) Normal Growth, Early Decline
- ( 3 ) Reduced Growth
- ( 4 ) Reduced Growth, Early Decline
- ( 9 ) Undetermined Pattern
- ( 8 ) Undetermined - not enough data

Maximum lung growth attained: ( 1 ) Yes ( 0 ) No

Plateau started: ( 2 ) No plateau ( 1 ) Yes ( 0 ) No

Decline started: ( 1 ) Yes ( 0 ) No

AGE AT each of the following periods (use '99' if N/A):

Maximum Lung Growth: \_\_\_\_ . \_\_\_\_

Start of Plateau: \_\_\_\_ . \_\_\_\_

Start of Decline: \_\_\_\_ . \_\_\_\_

### Pre-BD FEV1 Data and Percentiles: 1241

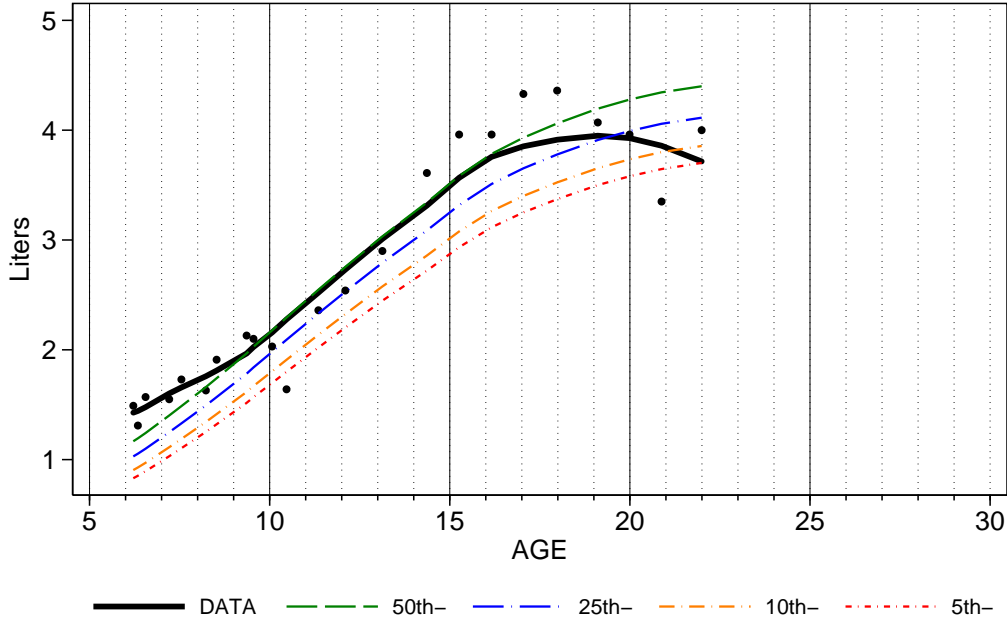

1241

**PATTERN OF GROWTH/DECLINE (Check One)**

- ( 1 ) Normal Growth
- ( 2 ) Normal Growth, Early Decline
- ( 3 ) Reduced Growth
- ( 4 ) Reduced Growth, Early Decline
- ( 9 ) Undetermined Pattern
- ( 8 ) Undetermined - not enough data

Maximum lung growth attained: ( 1 ) Yes ( 0 ) No

Plateau started: ( 2 ) No plateau ( 1 ) Yes ( 0 ) No

Decline started: ( 1 ) Yes ( 0 ) No

AGE AT each of the following periods (use '99' if N/A):

Maximum Lung Growth: \_\_\_\_ . \_\_\_\_

Start of Plateau: \_\_\_\_ . \_\_\_\_

Start of Decline: \_\_\_\_ . \_\_\_\_

### Pre-BD FEV1 Data and Percentiles: 1243

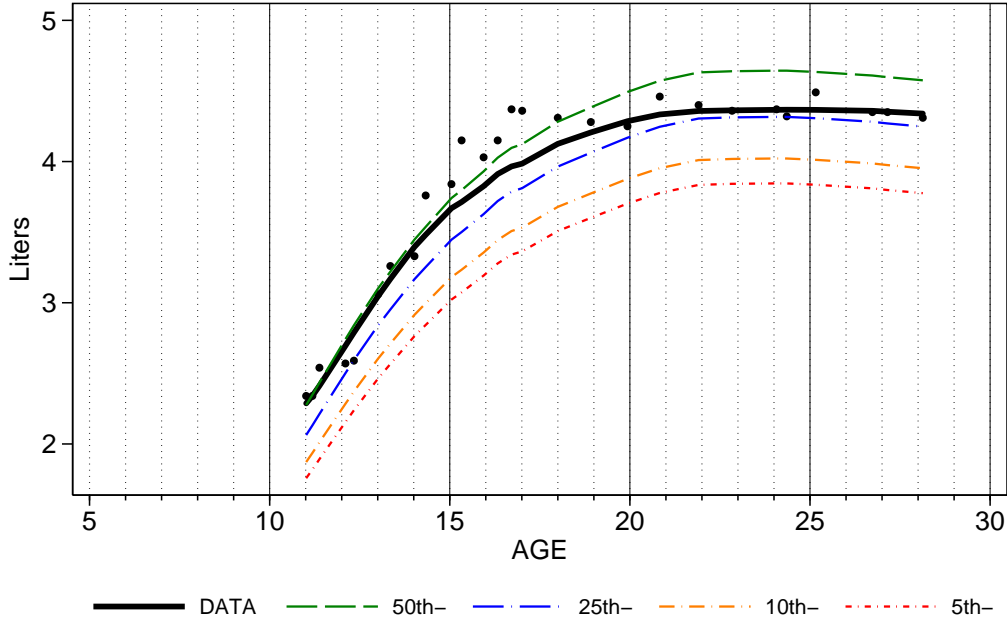

1243

**PATTERN OF GROWTH/DECLINE (Check One)**

- ( 1) Normal Growth
- ( 2) Normal Growth, Early Decline
- ( 3) Reduced Growth
- ( 4) Reduced Growth, Early Decline
- ( 9) Undetermined Pattern
- ( 8) Undetermined - not enough data

Maximum lung growth attained: ( 1) Yes ( 0) No

Plateau started: ( 2) No plateau ( 1) Yes ( 0) No

Decline started: ( 1) Yes ( 0) No

AGE AT each of the following periods (use '99' if N/A):

Maximum Lung Growth: \_\_\_\_ . \_\_\_\_

Start of Plateau: \_\_\_\_ . \_\_\_\_

Start of Decline: \_\_\_\_ . \_\_\_\_

### Pre-BD FEV1 Data and Percentiles: 1246

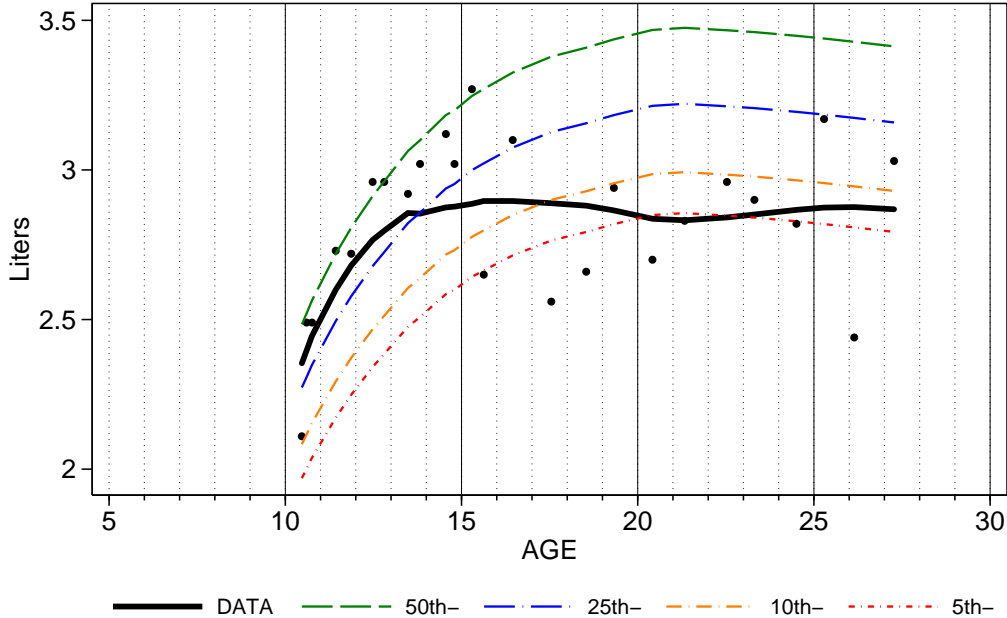

1246

**PATTERN OF GROWTH/DECLINE (Check One)**

- ( 1) Normal Growth
- ( 2) Normal Growth, Early Decline
- ( 3) Reduced Growth
- ( 4) Reduced Growth, Early Decline
- ( 9) Undetermined Pattern
- ( 8) Undetermined - not enough data

Maximum lung growth attained: ( 1) Yes ( 0) No

Plateau started: ( 2) No plateau ( 1) Yes ( 0) No

Decline started: ( 1) Yes ( 0) No

AGE AT each of the following periods (use '99' if N/A):

Maximum Lung Growth: \_\_\_\_ . \_\_\_\_

Start of Plateau: \_\_\_\_ . \_\_\_\_

Start of Decline: \_\_\_\_ . \_\_\_\_



### Pre-BD FEV1 Data and Percentiles: 1250

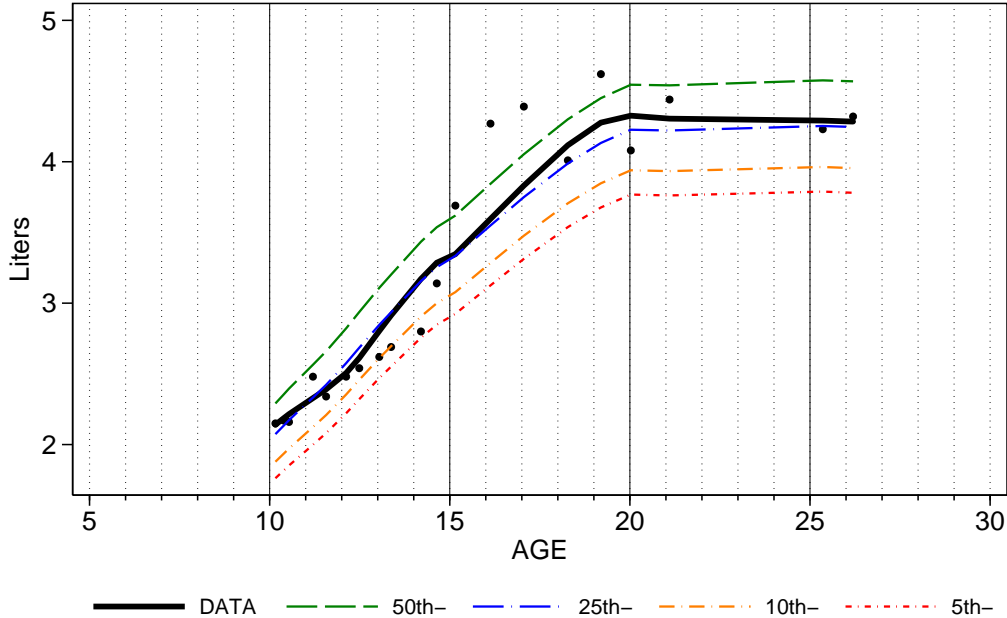

1250

**PATTERN OF GROWTH/DECLINE (Check One)**

- ( 1) Normal Growth
- ( 2) Normal Growth, Early Decline
- ( 3) Reduced Growth
- ( 4) Reduced Growth, Early Decline
- ( 9) Undetermined Pattern
- ( 8) Undetermined - not enough data

Maximum lung growth attained: ( 1) Yes ( 0) No

Plateau started: ( 2) No plateau ( 1) Yes ( 0) No

Decline started: ( 1) Yes ( 0) No

AGE AT each of the following periods (use '99' if N/A):

Maximum Lung Growth: \_\_\_\_ . \_\_\_\_

Start of Plateau: \_\_\_\_ . \_\_\_\_

Start of Decline: \_\_\_\_ . \_\_\_\_

### Pre-BD FEV1 Data and Percentiles: 1254

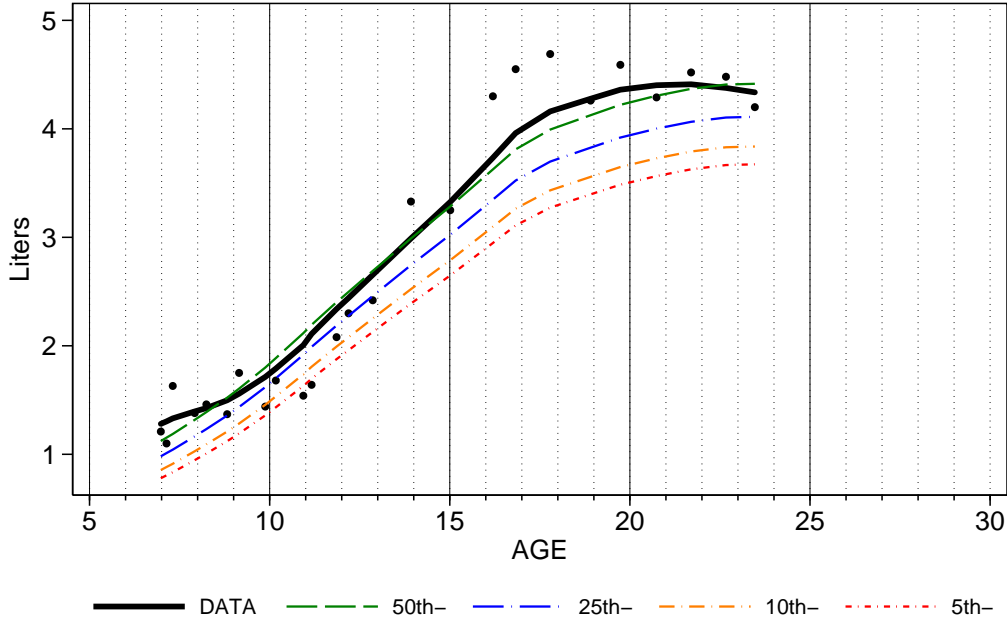

1254

**PATTERN OF GROWTH/DECLINE (Check One)**

- ( 1 ) Normal Growth
- ( 2 ) Normal Growth, Early Decline
- ( 3 ) Reduced Growth
- ( 4 ) Reduced Growth, Early Decline
- ( 9 ) Undetermined Pattern
- ( 8 ) Undetermined - not enough data

Maximum lung growth attained: ( 1 ) Yes ( 0 ) No

Plateau started: ( 2 ) No plateau ( 1 ) Yes ( 0 ) No

Decline started: ( 1 ) Yes ( 0 ) No

AGE AT each of the following periods (use '99' if N/A):

Maximum Lung Growth: \_\_\_\_ . \_\_\_\_

Start of Plateau: \_\_\_\_ . \_\_\_\_

Start of Decline: \_\_\_\_ . \_\_\_\_

### Pre-BD FEV1 Data and Percentiles: 1262

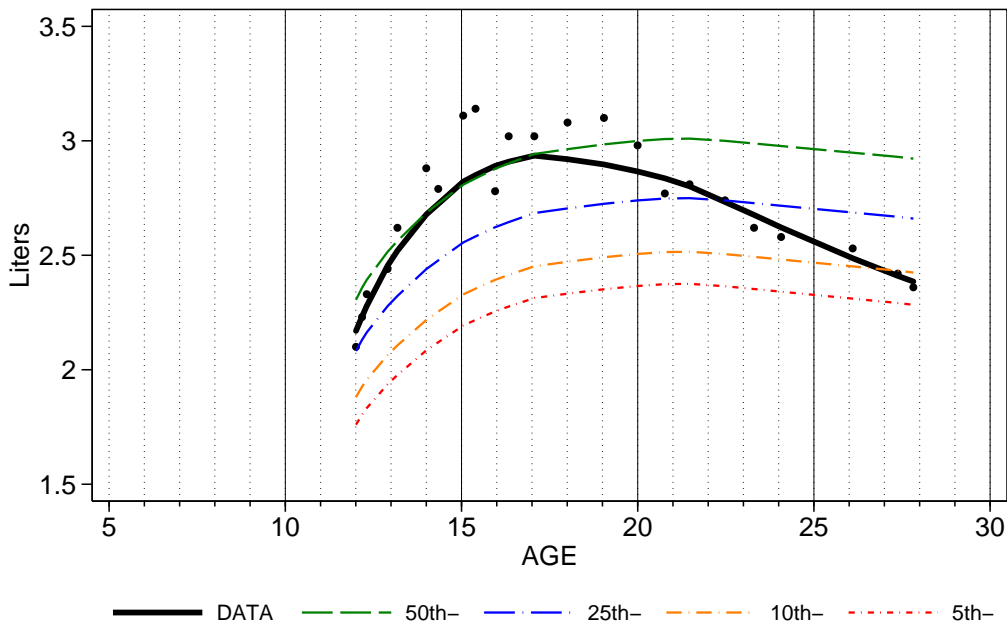

1262

**PATTERN OF GROWTH/DECLINE (Check One)**

- ( 1) Normal Growth
- ( 2) Normal Growth, Early Decline
- ( 3) Reduced Growth
- ( 4) Reduced Growth, Early Decline
- ( 9) Undetermined Pattern
- ( 8) Undetermined - not enough data

Maximum lung growth attained: ( 1) Yes ( 0) No

Plateau started: ( 2) No plateau ( 1) Yes ( 0) No

Decline started: ( 1) Yes ( 0) No

AGE AT each of the following periods (use '99' if N/A):

Maximum Lung Growth: \_\_\_\_ . \_\_\_\_

Start of Plateau: \_\_\_\_ . \_\_\_\_

Start of Decline: \_\_\_\_ . \_\_\_\_

### Pre-BD FEV1 Data and Percentiles: 1263

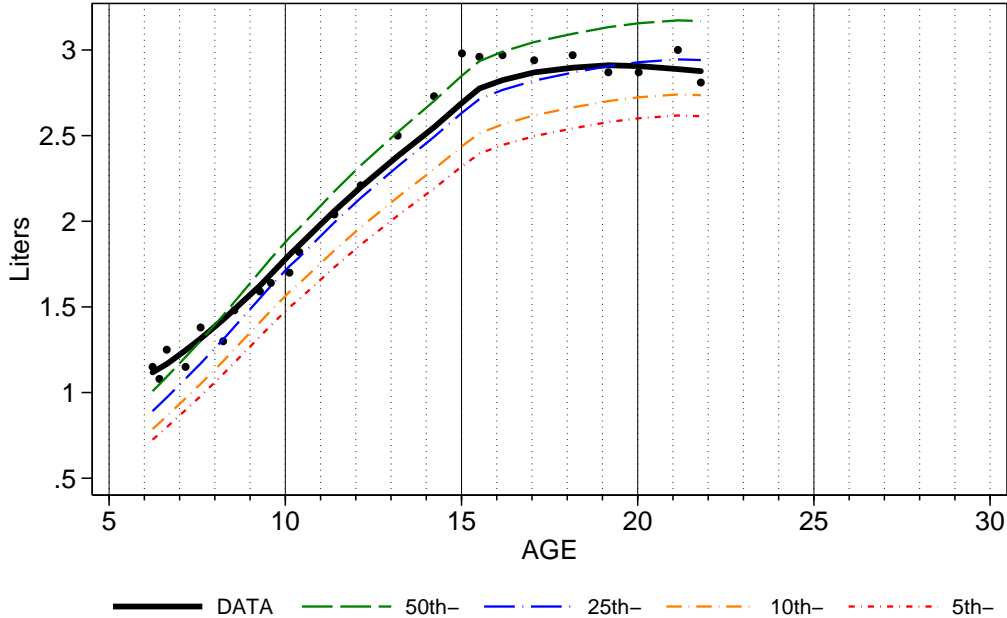

1263

**PATTERN OF GROWTH/DECLINE (Check One)**

- ( 1) Normal Growth
- ( 2) Normal Growth, Early Decline
- ( 3) Reduced Growth
- ( 4) Reduced Growth, Early Decline
- ( 9) Undetermined Pattern
- ( 8) Undetermined - not enough data

Maximum lung growth attained: ( 1) Yes ( 0) No

Plateau started: ( 2) No plateau ( 1) Yes ( 0) No

Decline started: ( 1) Yes ( 0) No

AGE AT each of the following periods (use '99' if N/A):

Maximum Lung Growth: \_\_\_\_ . \_\_\_\_

Start of Plateau: \_\_\_\_ . \_\_\_\_

Start of Decline: \_\_\_\_ . \_\_\_\_

### Pre-BD FEV1 Data and Percentiles: 1270

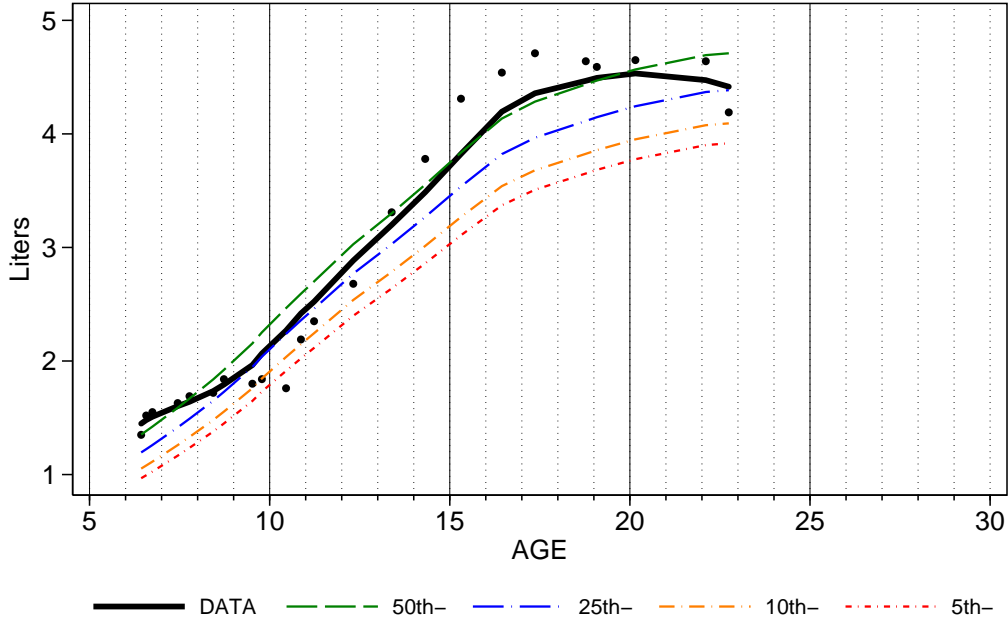

1270

**PATTERN OF GROWTH/DECLINE (Check One)**

- ( 1 ) Normal Growth
- ( 2 ) Normal Growth, Early Decline
- ( 3 ) Reduced Growth
- ( 4 ) Reduced Growth, Early Decline
- ( 9 ) Undetermined Pattern
- ( 8 ) Undetermined - not enough data

Maximum lung growth attained: ( 1 ) Yes ( 0 ) No

Plateau started: ( 2 ) No plateau ( 1 ) Yes ( 0 ) No

Decline started: ( 1 ) Yes ( 0 ) No

AGE AT each of the following periods (use '99' if N/A):

Maximum Lung Growth: \_\_\_\_ . \_\_\_\_

Start of Plateau: \_\_\_\_ . \_\_\_\_

Start of Decline: \_\_\_\_ . \_\_\_\_

### Pre-BD FEV1 Data and Percentiles: 1280

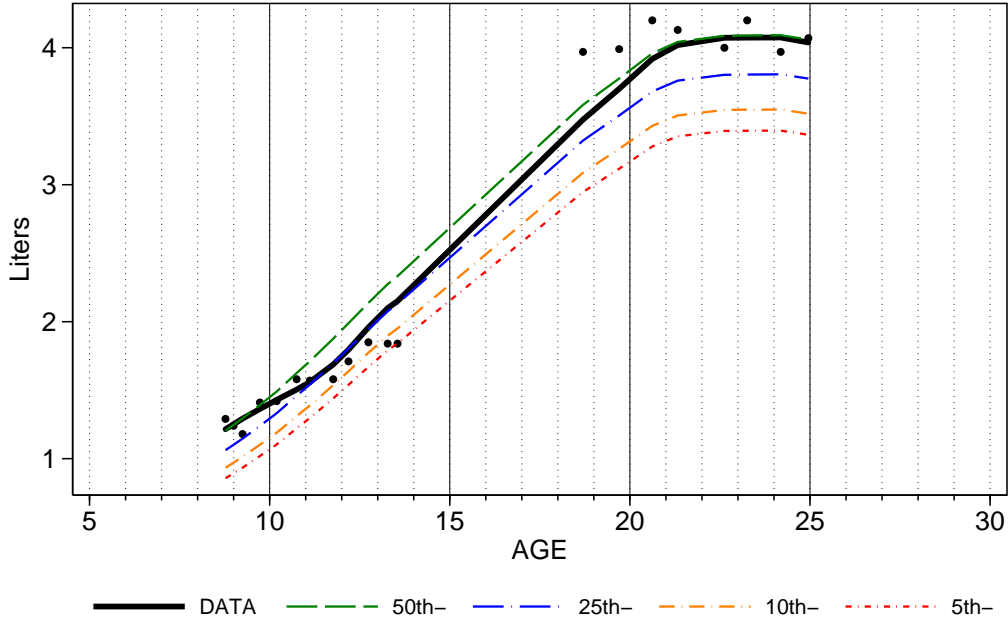

1280

**PATTERN OF GROWTH/DECLINE (Check One)**

- ( 1 ) Normal Growth
- ( 2 ) Normal Growth, Early Decline
- ( 3 ) Reduced Growth
- ( 4 ) Reduced Growth, Early Decline
- ( 9 ) Undetermined Pattern
- ( 8 ) Undetermined - not enough data

Maximum lung growth attained: ( 1 ) Yes ( 0 ) No

Plateau started: ( 2 ) No plateau ( 1 ) Yes ( 0 ) No

Decline started: ( 1 ) Yes ( 0 ) No

AGE AT each of the following periods (use '99' if N/A):

Maximum Lung Growth: \_\_\_\_ . \_\_\_\_

Start of Plateau: \_\_\_\_ . \_\_\_\_

Start of Decline: \_\_\_\_ . \_\_\_\_

### Pre-BD FEV1 Data and Percentiles: 1281

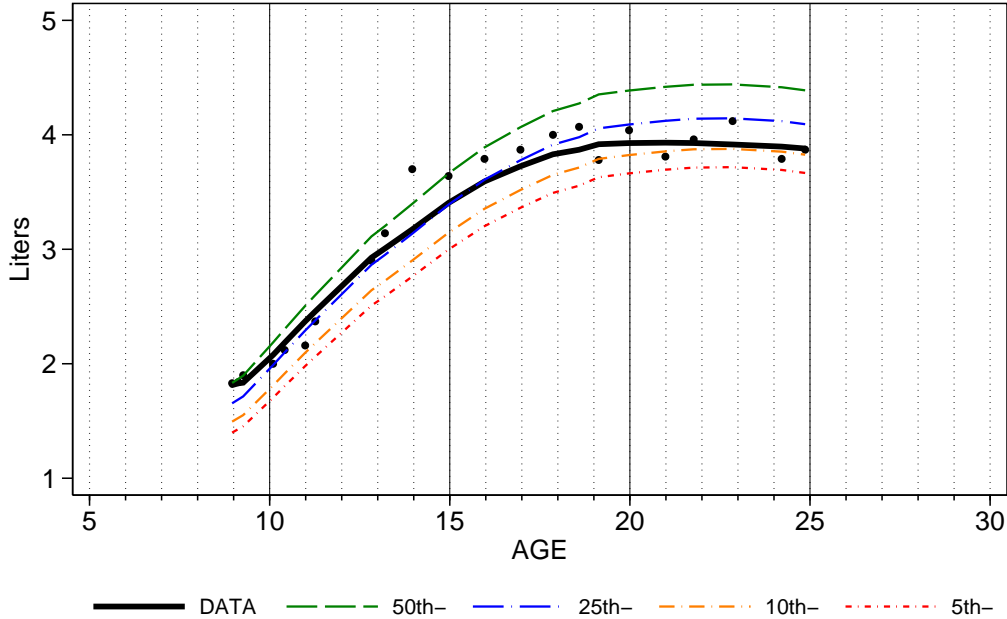

1281

**PATTERN OF GROWTH/DECLINE (Check One)**

- ( 1 ) Normal Growth
- ( 2 ) Normal Growth, Early Decline
- ( 3 ) Reduced Growth
- ( 4 ) Reduced Growth, Early Decline
- ( 9 ) Undetermined Pattern
- ( 8 ) Undetermined - not enough data

Maximum lung growth attained: ( 1 ) Yes ( 0 ) No

Plateau started: ( 2 ) No plateau ( 1 ) Yes ( 0 ) No

Decline started: ( 1 ) Yes ( 0 ) No

AGE AT each of the following periods (use '99' if N/A):

Maximum Lung Growth: \_\_\_\_ . \_\_\_\_

Start of Plateau: \_\_\_\_ . \_\_\_\_

Start of Decline: \_\_\_\_ . \_\_\_\_

### Pre-BD FEV1 Data and Percentiles: 1284

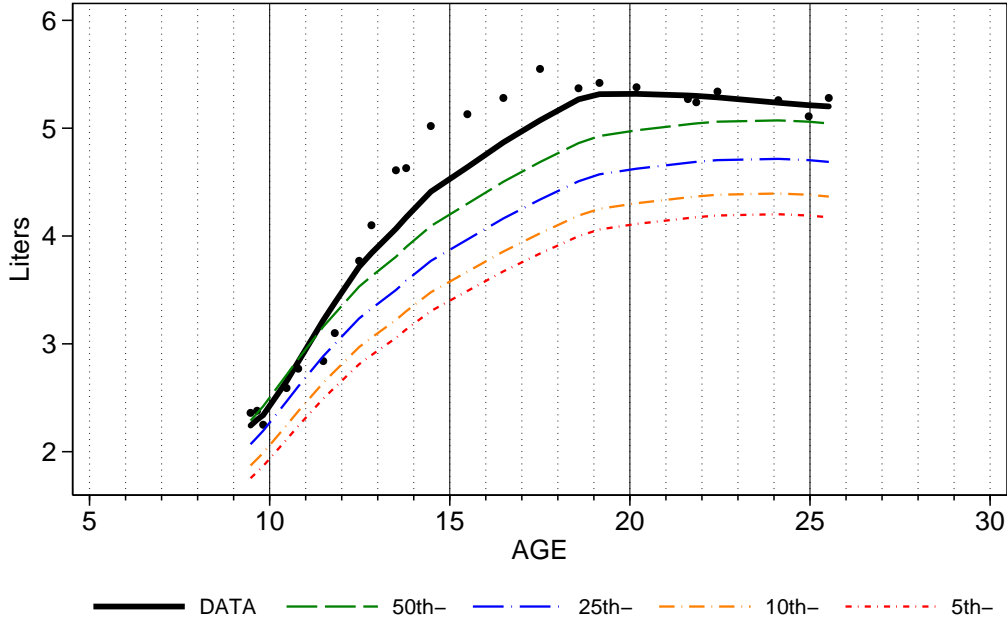

1284

**PATTERN OF GROWTH/DECLINE (Check One)**

- ( 1) Normal Growth
- ( 2) Normal Growth, Early Decline
- ( 3) Reduced Growth
- ( 4) Reduced Growth, Early Decline
- ( 9) Undetermined Pattern
- ( 8) Undetermined - not enough data

Maximum lung growth attained: ( 1) Yes ( 0) No

Plateau started: ( 2) No plateau ( 1) Yes ( 0) No

Decline started: ( 1) Yes ( 0) No

AGE AT each of the following periods (use '99' if N/A):

Maximum Lung Growth: \_\_\_\_ . \_\_\_\_

Start of Plateau: \_\_\_\_ . \_\_\_\_

Start of Decline: \_\_\_\_ . \_\_\_\_



### Pre-BD FEV1 Data and Percentiles: 1287

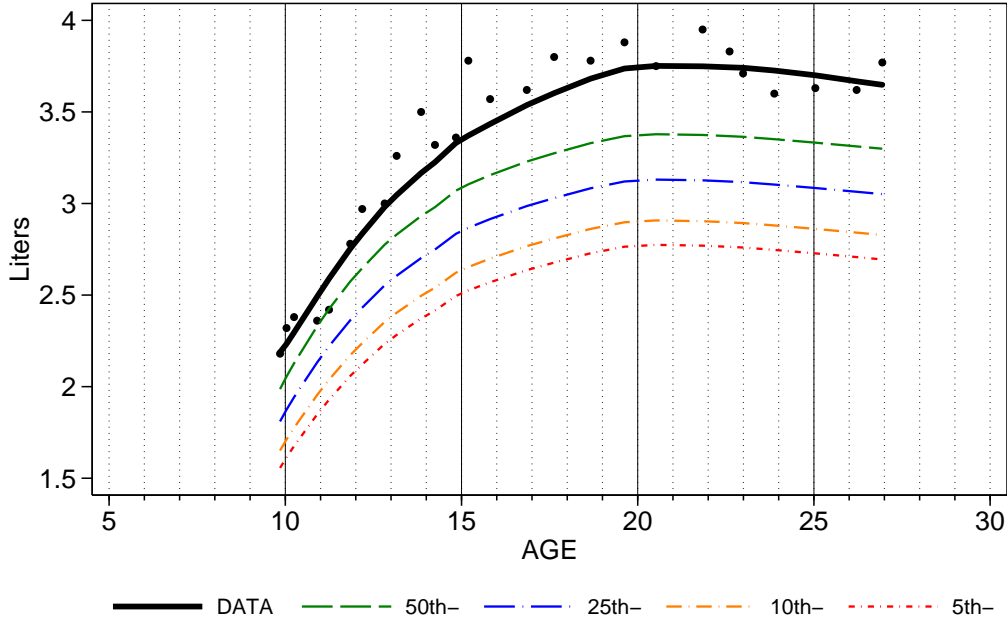

1287

**PATTERN OF GROWTH/DECLINE (Check One)**

- ( 1) Normal Growth
- ( 2) Normal Growth, Early Decline
- ( 3) Reduced Growth
- ( 4) Reduced Growth, Early Decline
- ( 9) Undetermined Pattern
- ( 8) Undetermined - not enough data

Maximum lung growth attained: ( 1) Yes ( 0) No

Plateau started: ( 2) No plateau ( 1) Yes ( 0) No

Decline started: ( 1) Yes ( 0) No

AGE AT each of the following periods (use '99' if N/A):

Maximum Lung Growth: \_\_\_\_ . \_\_\_\_

Start of Plateau: \_\_\_\_ . \_\_\_\_

Start of Decline: \_\_\_\_ . \_\_\_\_

### Pre-BD FEV1 Data and Percentiles: 1291

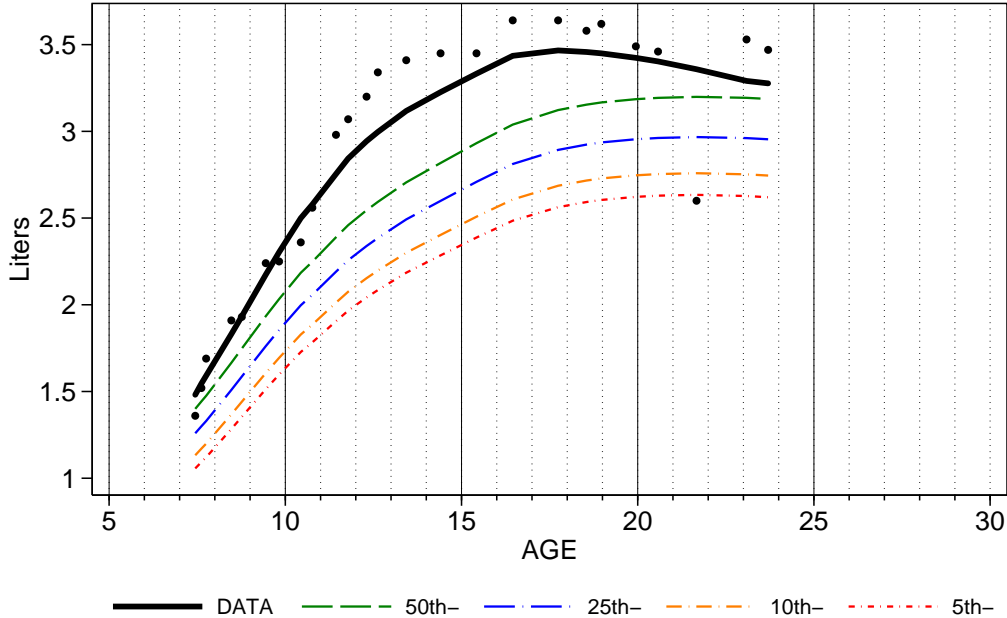

1291

**PATTERN OF GROWTH/DECLINE (Check One)**

- ( 1 ) Normal Growth
- ( 2 ) Normal Growth, Early Decline
- ( 3 ) Reduced Growth
- ( 4 ) Reduced Growth, Early Decline
- ( 9 ) Undetermined Pattern
- ( 8 ) Undetermined - not enough data

Maximum lung growth attained: ( 1 ) Yes ( 0 ) No

Plateau started: ( 2 ) No plateau ( 1 ) Yes ( 0 ) No

Decline started: ( 1 ) Yes ( 0 ) No

AGE AT each of the following periods (use '99' if N/A):

Maximum Lung Growth: \_\_\_\_ . \_\_\_\_

Start of Plateau: \_\_\_\_ . \_\_\_\_

Start of Decline: \_\_\_\_ . \_\_\_\_

### Pre-BD FEV1 Data and Percentiles: 1293

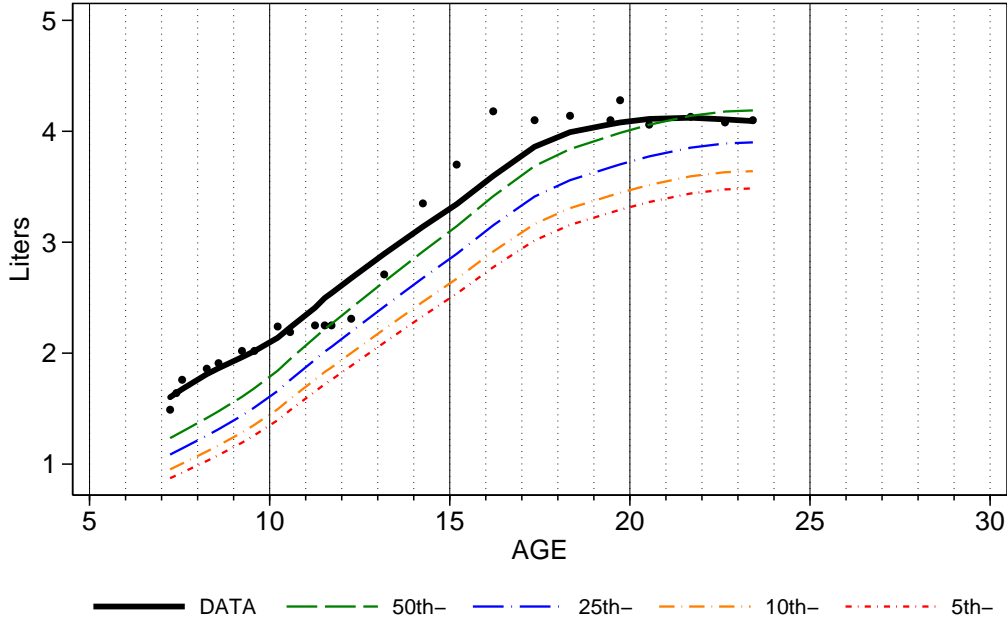

1293

**PATTERN OF GROWTH/DECLINE (Check One)**

- ( 1 ) Normal Growth
- ( 2 ) Normal Growth, Early Decline
- ( 3 ) Reduced Growth
- ( 4 ) Reduced Growth, Early Decline
- ( 9 ) Undetermined Pattern
- ( 8 ) Undetermined - not enough data

Maximum lung growth attained: ( 1 ) Yes ( 0 ) No

Plateau started: ( 2 ) No plateau ( 1 ) Yes ( 0 ) No

Decline started: ( 1 ) Yes ( 0 ) No

AGE AT each of the following periods (use '99' if N/A):

Maximum Lung Growth: \_\_\_\_ . \_\_\_\_

Start of Plateau: \_\_\_\_ . \_\_\_\_

Start of Decline: \_\_\_\_ . \_\_\_\_

### Pre-BD FEV1 Data and Percentiles: 1299

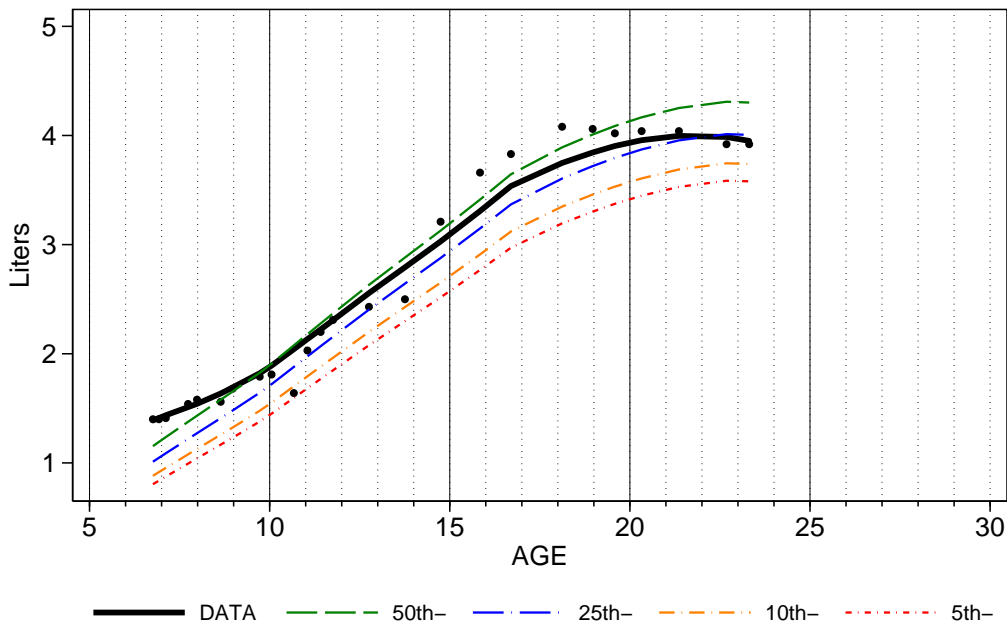

1299

**PATTERN OF GROWTH/DECLINE (Check One)**

- ( 1 ) Normal Growth
- ( 2 ) Normal Growth, Early Decline
- ( 3 ) Reduced Growth
- ( 4 ) Reduced Growth, Early Decline
- ( 9 ) Undetermined Pattern
- ( 8 ) Undetermined - not enough data

Maximum lung growth attained: ( 1 ) Yes ( 0 ) No

Plateau started: ( 2 ) No plateau ( 1 ) Yes ( 0 ) No

Decline started: ( 1 ) Yes ( 0 ) No

AGE AT each of the following periods (use '99' if N/A):

Maximum Lung Growth: \_\_\_\_ . \_\_\_\_

Start of Plateau: \_\_\_\_ . \_\_\_\_

Start of Decline: \_\_\_\_ . \_\_\_\_

### Pre-BD FEV1 Data and Percentiles: 1305

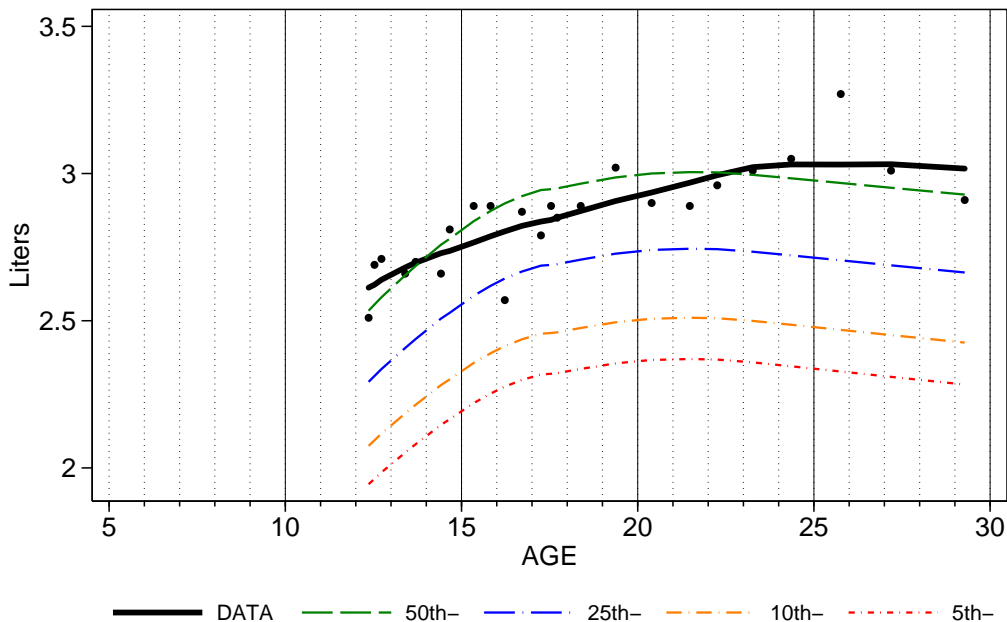

1305

**PATTERN OF GROWTH/DECLINE (Check One)**

- ( 1 ) Normal Growth
- ( 2 ) Normal Growth, Early Decline
- ( 3 ) Reduced Growth
- ( 4 ) Reduced Growth, Early Decline
- ( 9 ) Undetermined Pattern
- ( 8 ) Undetermined - not enough data

Maximum lung growth attained: ( 1 ) Yes ( 0 ) No

Plateau started: ( 2 ) No plateau ( 1 ) Yes ( 0 ) No

Decline started: ( 1 ) Yes ( 0 ) No

AGE AT each of the following periods (use '99' if N/A):

Maximum Lung Growth: \_\_\_\_ . \_\_\_\_

Start of Plateau: \_\_\_\_ . \_\_\_\_

Start of Decline: \_\_\_\_ . \_\_\_\_

### Pre-BD FEV1 Data and Percentiles: 1307

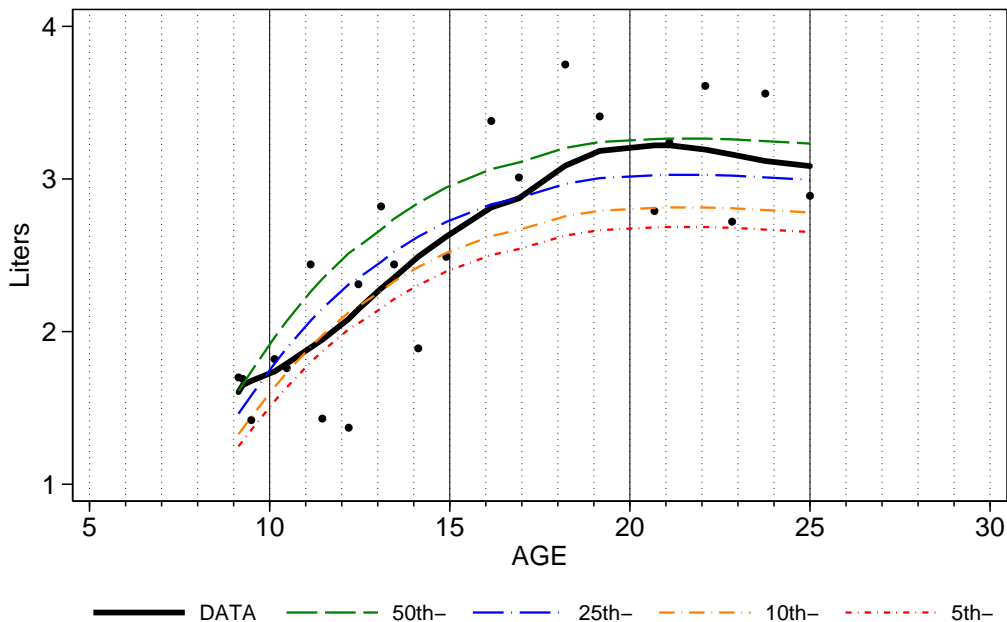

1307

**PATTERN OF GROWTH/DECLINE (Check One)**

- ( 1 ) Normal Growth
- ( 2 ) Normal Growth, Early Decline
- ( 3 ) Reduced Growth
- ( 4 ) Reduced Growth, Early Decline
- ( 9 ) Undetermined Pattern
- ( 8 ) Undetermined - not enough data

Maximum lung growth attained: ( 1 ) Yes ( 0 ) No

Plateau started: ( 2 ) No plateau ( 1 ) Yes ( 0 ) No

Decline started: ( 1 ) Yes ( 0 ) No

AGE AT each of the following periods (use '99' if N/A):

Maximum Lung Growth: \_\_\_\_ . \_\_\_\_

Start of Plateau: \_\_\_\_ . \_\_\_\_

Start of Decline: \_\_\_\_ . \_\_\_\_

### Pre-BD FEV1 Data and Percentiles: 1308

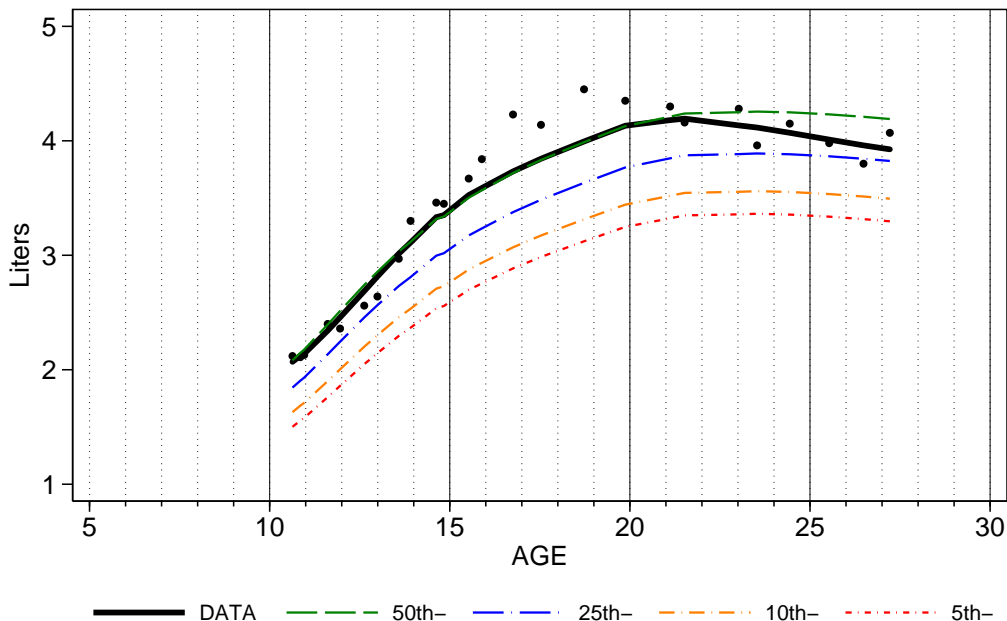

1308

**PATTERN OF GROWTH/DECLINE (Check One)**

- ( 1 ) Normal Growth
- ( 2 ) Normal Growth, Early Decline
- ( 3 ) Reduced Growth
- ( 4 ) Reduced Growth, Early Decline
- ( 9 ) Undetermined Pattern
- ( 8 ) Undetermined - not enough data

Maximum lung growth attained: ( 1 ) Yes ( 0 ) No

Plateau started: ( 2 ) No plateau ( 1 ) Yes ( 0 ) No

Decline started: ( 1 ) Yes ( 0 ) No

AGE AT each of the following periods (use '99' if N/A):

Maximum Lung Growth: \_\_\_\_ . \_\_\_\_

Start of Plateau: \_\_\_\_ . \_\_\_\_

Start of Decline: \_\_\_\_ . \_\_\_\_

### Pre-BD FEV1 Data and Percentiles: 1309

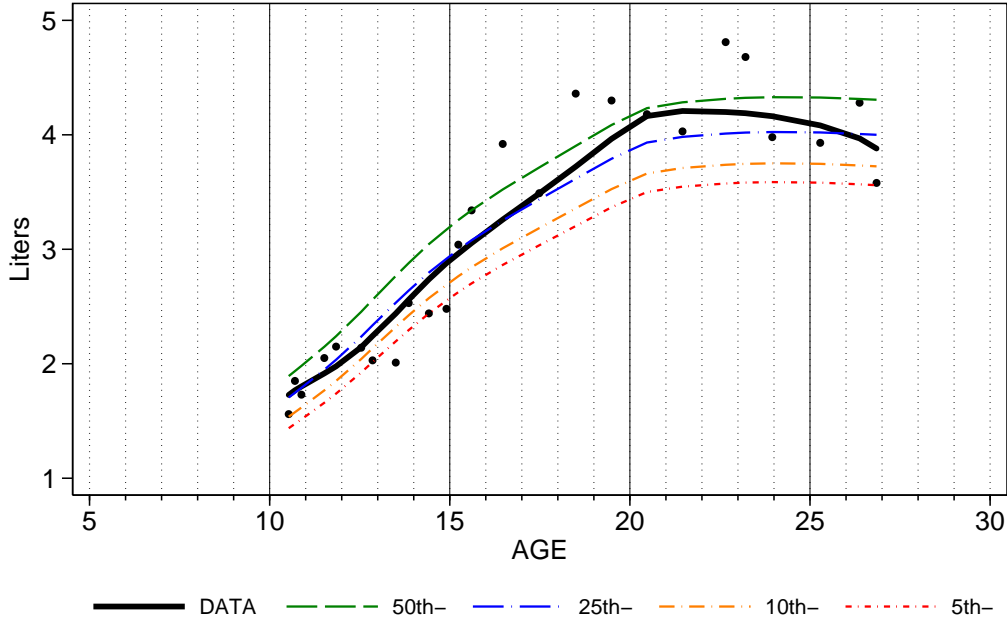

1309

**PATTERN OF GROWTH/DECLINE (Check One)**

- ( 1 ) Normal Growth
- ( 2 ) Normal Growth, Early Decline
- ( 3 ) Reduced Growth
- ( 4 ) Reduced Growth, Early Decline
- ( 9 ) Undetermined Pattern
- ( 8 ) Undetermined - not enough data

Maximum lung growth attained: ( 1 ) Yes ( 0 ) No

Plateau started: ( 2 ) No plateau ( 1 ) Yes ( 0 ) No

Decline started: ( 1 ) Yes ( 0 ) No

AGE AT each of the following periods (use '99' if N/A):

Maximum Lung Growth: \_\_\_\_ . \_\_\_\_

Start of Plateau: \_\_\_\_ . \_\_\_\_

Start of Decline: \_\_\_\_ . \_\_\_\_



### Pre-BD FEV1 Data and Percentiles: 1311

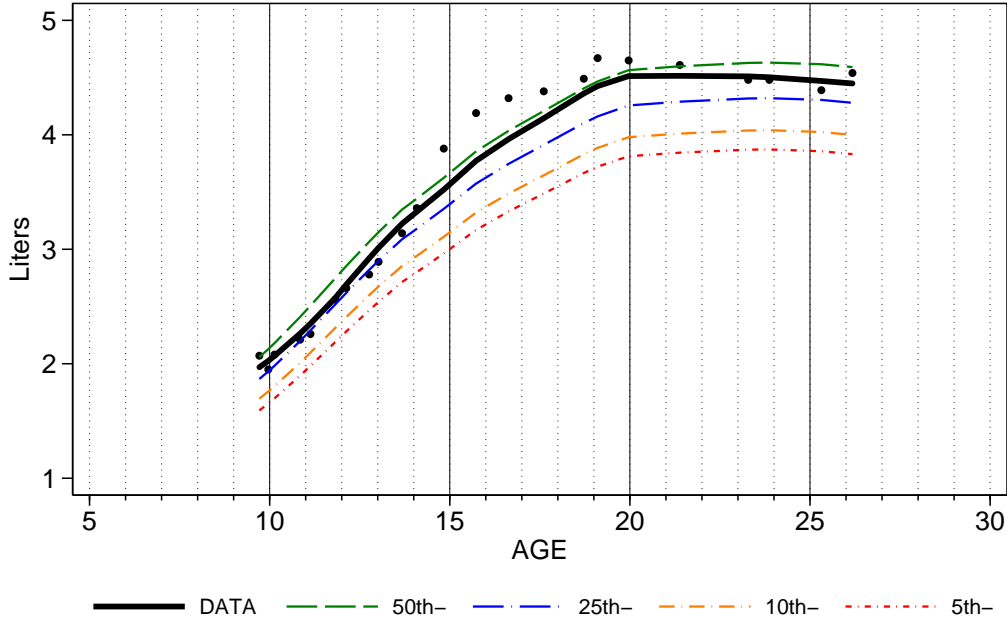

1311

**PATTERN OF GROWTH/DECLINE (Check One)**

- ( 1) Normal Growth
- ( 2) Normal Growth, Early Decline
- ( 3) Reduced Growth
- ( 4) Reduced Growth, Early Decline
- ( 9) Undetermined Pattern
- ( 8) Undetermined - not enough data

Maximum lung growth attained: ( 1) Yes ( 0) No

Plateau started: ( 2) No plateau ( 1) Yes ( 0) No

Decline started: ( 1) Yes ( 0) No

AGE AT each of the following periods (use '99' if N/A):

Maximum Lung Growth: \_\_\_\_ . \_\_\_\_

Start of Plateau: \_\_\_\_ . \_\_\_\_

Start of Decline: \_\_\_\_ . \_\_\_\_

### Pre-BD FEV1 Data and Percentiles: 1316

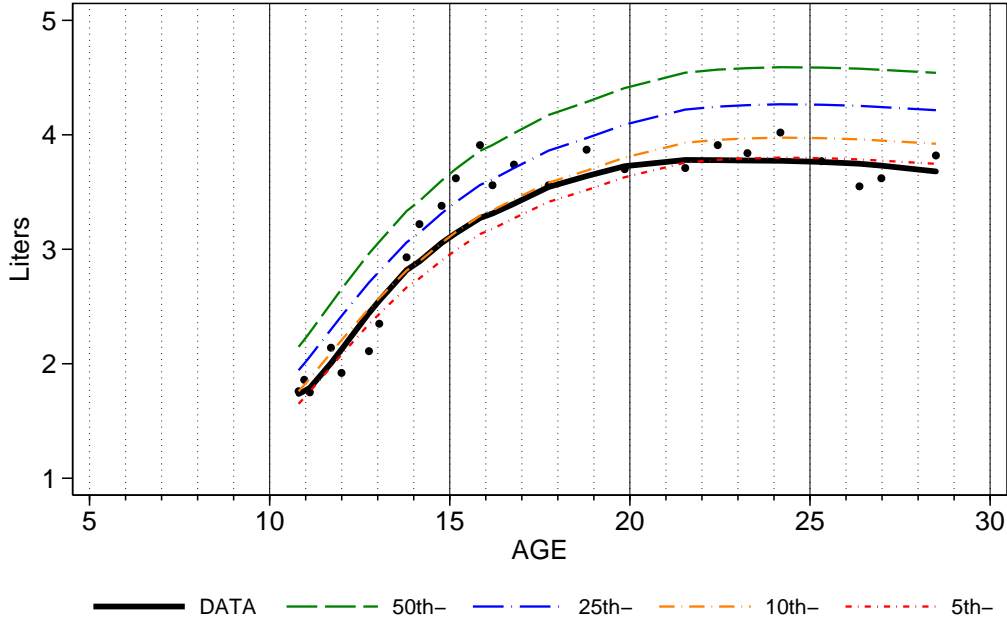

1316

**PATTERN OF GROWTH/DECLINE (Check One)**

- ( 1) Normal Growth
- ( 2) Normal Growth, Early Decline
- ( 3) Reduced Growth
- ( 4) Reduced Growth, Early Decline
- ( 9) Undetermined Pattern
- ( 8) Undetermined - not enough data

Maximum lung growth attained: ( 1) Yes ( 0) No

Plateau started: ( 2) No plateau ( 1) Yes ( 0) No

Decline started: ( 1) Yes ( 0) No

AGE AT each of the following periods (use '99' if N/A):

Maximum Lung Growth: \_\_\_\_ . \_\_\_\_

Start of Plateau: \_\_\_\_ . \_\_\_\_

Start of Decline: \_\_\_\_ . \_\_\_\_

### Pre-BD FEV1 Data and Percentiles: 1320

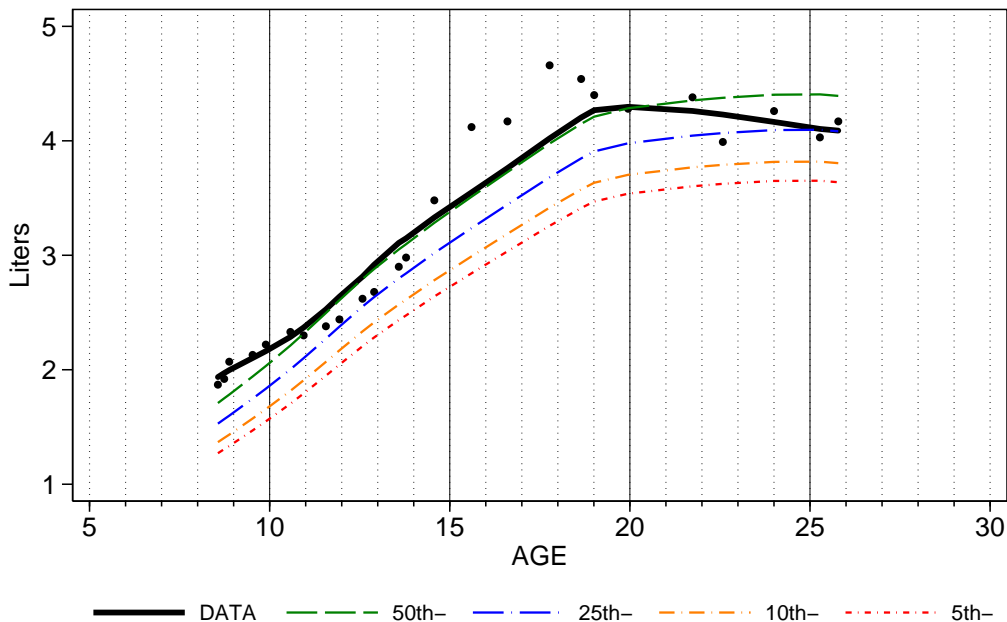

1320

**PATTERN OF GROWTH/DECLINE (Check One)**

- ( 1 ) Normal Growth
- ( 2 ) Normal Growth, Early Decline
- ( 3 ) Reduced Growth
- ( 4 ) Reduced Growth, Early Decline
- ( 9 ) Undetermined Pattern
- ( 8 ) Undetermined - not enough data

Maximum lung growth attained: ( 1 ) Yes ( 0 ) No

Plateau started: ( 2 ) No plateau ( 1 ) Yes ( 0 ) No

Decline started: ( 1 ) Yes ( 0 ) No

AGE AT each of the following periods (use '99' if N/A):

Maximum Lung Growth: \_\_\_\_ . \_\_\_\_

Start of Plateau: \_\_\_\_ . \_\_\_\_

Start of Decline: \_\_\_\_ . \_\_\_\_

### Pre-BD FEV1 Data and Percentiles: 1321

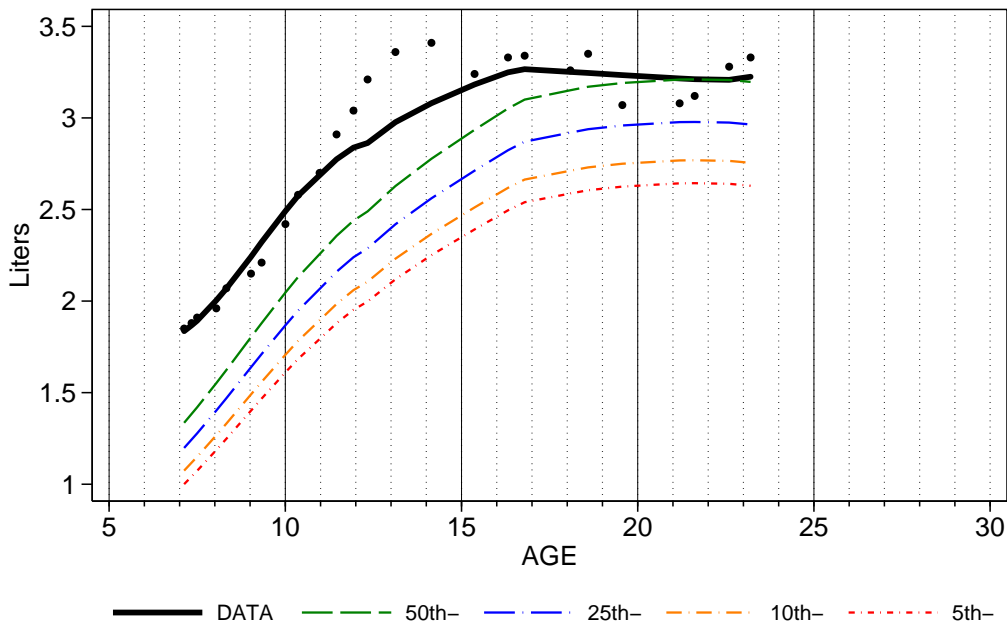

1321

**PATTERN OF GROWTH/DECLINE (Check One)**

- ( 1) Normal Growth
- ( 2) Normal Growth, Early Decline
- ( 3) Reduced Growth
- ( 4) Reduced Growth, Early Decline
- ( 9) Undetermined Pattern
- ( 8) Undetermined - not enough data

Maximum lung growth attained: ( 1) Yes ( 0) No

Plateau started: ( 2) No plateau ( 1) Yes ( 0) No

Decline started: ( 1) Yes ( 0) No

AGE AT each of the following periods (use '99' if N/A):

Maximum Lung Growth: \_\_\_\_ . \_\_\_\_

Start of Plateau: \_\_\_\_ . \_\_\_\_

Start of Decline: \_\_\_\_ . \_\_\_\_

### Pre-BD FEV1 Data and Percentiles: 1324

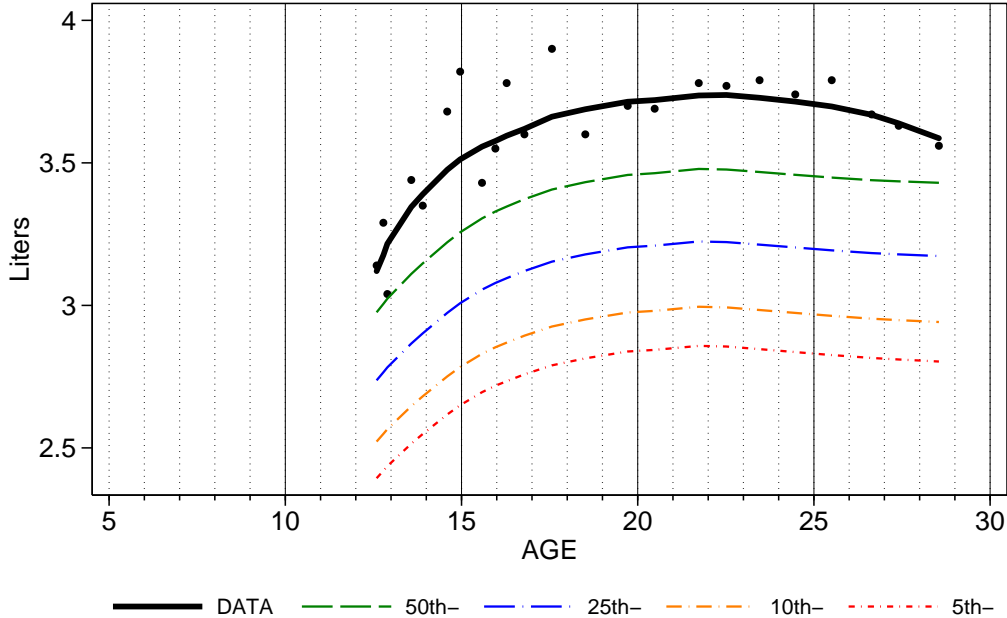

1324

**PATTERN OF GROWTH/DECLINE (Check One)**

- ( 1) Normal Growth
- ( 2) Normal Growth, Early Decline
- ( 3) Reduced Growth
- ( 4) Reduced Growth, Early Decline
- ( 9) Undetermined Pattern
- ( 8) Undetermined - not enough data

Maximum lung growth attained: ( 1) Yes ( 0) No

Plateau started: ( 2) No plateau ( 1) Yes ( 0) No

Decline started: ( 1) Yes ( 0) No

AGE AT each of the following periods (use '99' if N/A):

Maximum Lung Growth: \_\_\_\_ . \_\_\_\_

Start of Plateau: \_\_\_\_ . \_\_\_\_

Start of Decline: \_\_\_\_ . \_\_\_\_

### Pre-BD FEV1 Data and Percentiles: 1332

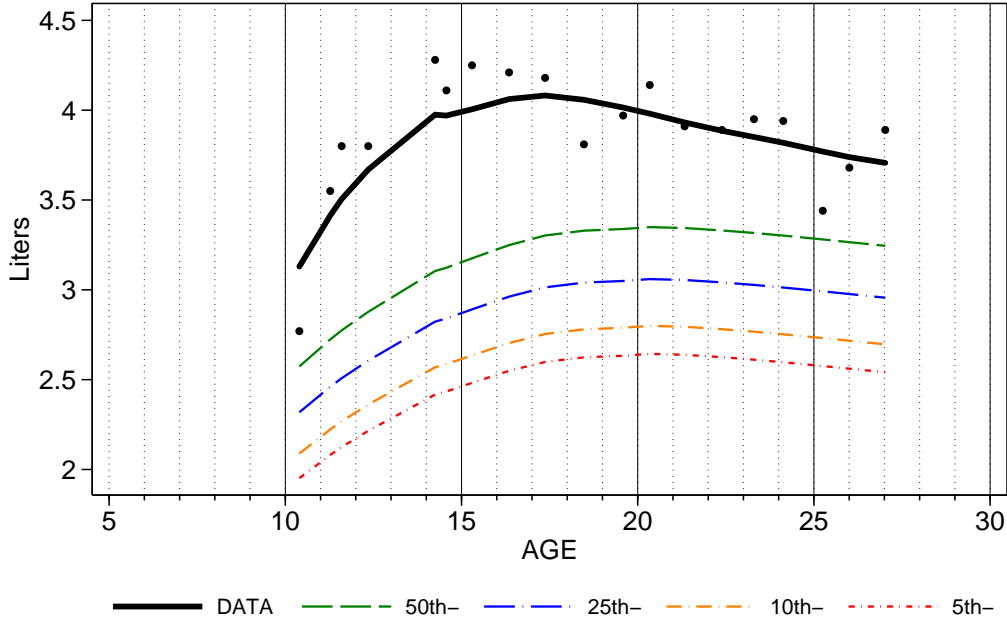

1332

**PATTERN OF GROWTH/DECLINE (Check One)**

- ( 1) Normal Growth
- ( 2) Normal Growth, Early Decline
- ( 3) Reduced Growth
- ( 4) Reduced Growth, Early Decline
- ( 9) Undetermined Pattern
- ( 8) Undetermined - not enough data

Maximum lung growth attained: ( 1) Yes ( 0) No

Plateau started: ( 2) No plateau ( 1) Yes ( 0) No

Decline started: ( 1) Yes ( 0) No

AGE AT each of the following periods (use '99' if N/A):

Maximum Lung Growth: \_\_\_\_ . \_\_\_\_

Start of Plateau: \_\_\_\_ . \_\_\_\_

Start of Decline: \_\_\_\_ . \_\_\_\_

### Pre-BD FEV1 Data and Percentiles: 1346

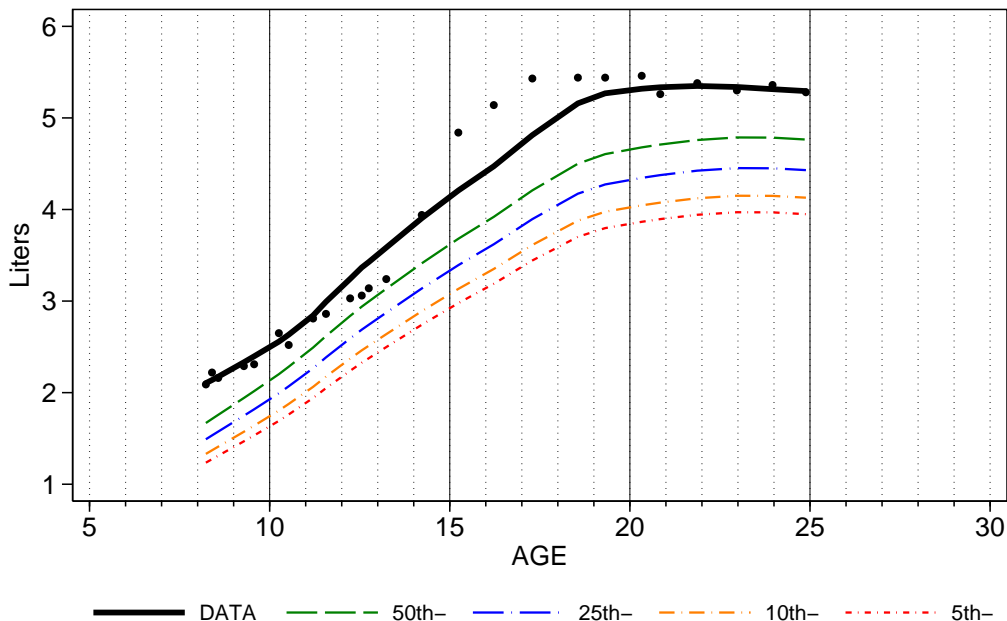

1346

**PATTERN OF GROWTH/DECLINE (Check One)**

- ( 1 ) Normal Growth
- ( 2 ) Normal Growth, Early Decline
- ( 3 ) Reduced Growth
- ( 4 ) Reduced Growth, Early Decline
- ( 9 ) Undetermined Pattern
- ( 8 ) Undetermined - not enough data

Maximum lung growth attained: ( 1 ) Yes ( 0 ) No

Plateau started: ( 2 ) No plateau ( 1 ) Yes ( 0 ) No

Decline started: ( 1 ) Yes ( 0 ) No

AGE AT each of the following periods (use '99' if N/A):

Maximum Lung Growth: \_\_\_\_ . \_\_\_\_

Start of Plateau: \_\_\_\_ . \_\_\_\_

Start of Decline: \_\_\_\_ . \_\_\_\_

### Pre-BD FEV1 Data and Percentiles: 1349

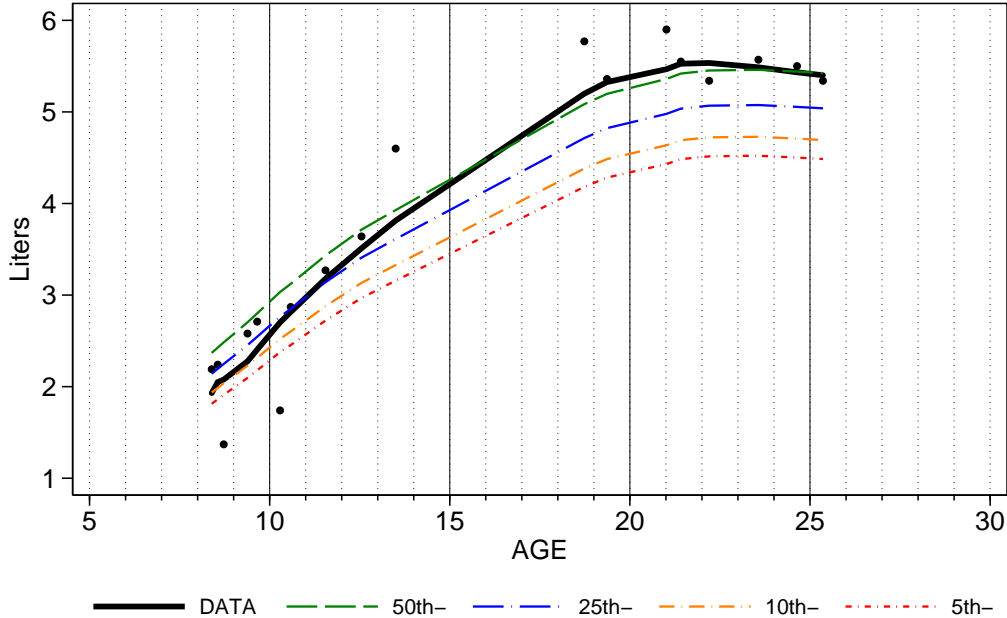

1349

**PATTERN OF GROWTH/DECLINE (Check One)**

- ( 1 ) Normal Growth
- ( 2 ) Normal Growth, Early Decline
- ( 3 ) Reduced Growth
- ( 4 ) Reduced Growth, Early Decline
- ( 9 ) Undetermined Pattern
- ( 8 ) Undetermined - not enough data

Maximum lung growth attained: ( 1 ) Yes ( 0 ) No

Plateau started: ( 2 ) No plateau ( 1 ) Yes ( 0 ) No

Decline started: ( 1 ) Yes ( 0 ) No

AGE AT each of the following periods (use '99' if N/A):

Maximum Lung Growth: \_\_\_\_ . \_\_\_\_

Start of Plateau: \_\_\_\_ . \_\_\_\_

Start of Decline: \_\_\_\_ . \_\_\_\_



### Pre-BD FEV1 Data and Percentiles: 1353

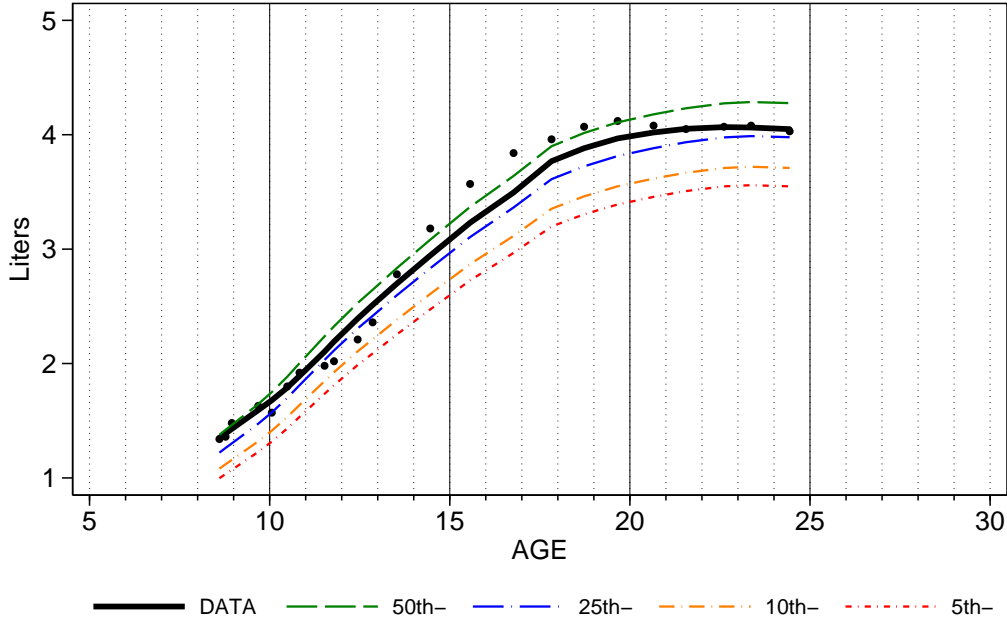

1353

**PATTERN OF GROWTH/DECLINE (Check One)**

- ( 1) Normal Growth
- ( 2) Normal Growth, Early Decline
- ( 3) Reduced Growth
- ( 4) Reduced Growth, Early Decline
- ( 9) Undetermined Pattern
- ( 8) Undetermined - not enough data

Maximum lung growth attained: ( 1) Yes ( 0) No

Plateau started: ( 2) No plateau ( 1) Yes ( 0) No

Decline started: ( 1) Yes ( 0) No

AGE AT each of the following periods (use '99' if N/A):

Maximum Lung Growth: \_\_\_\_ . \_\_\_\_

Start of Plateau: \_\_\_\_ . \_\_\_\_

Start of Decline: \_\_\_\_ . \_\_\_\_

### Pre-BD FEV1 Data and Percentiles: 1355

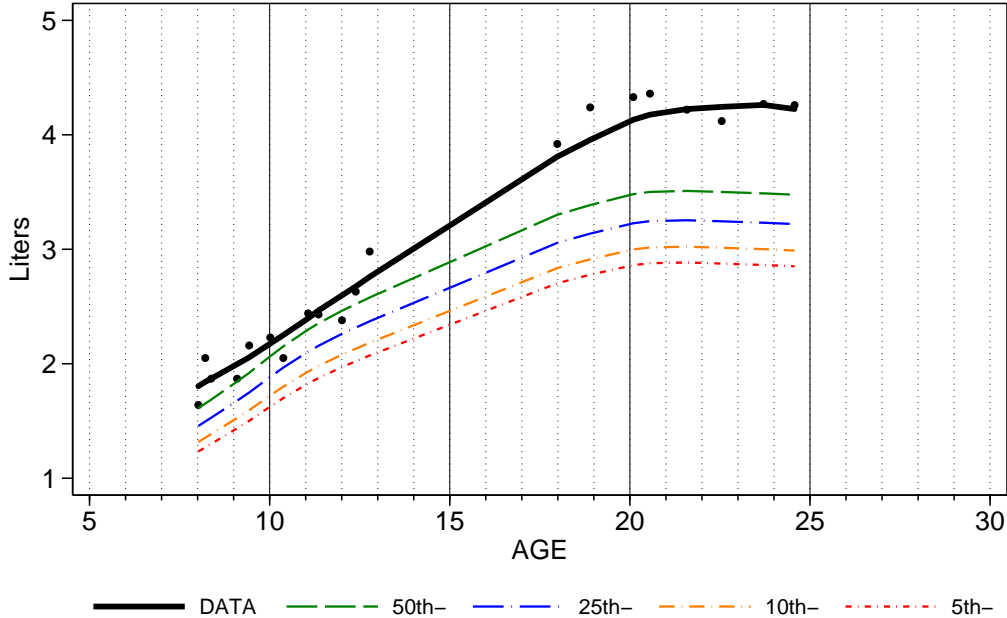

1355

**PATTERN OF GROWTH/DECLINE (Check One)**

- ( 1 ) Normal Growth
- ( 2 ) Normal Growth, Early Decline
- ( 3 ) Reduced Growth
- ( 4 ) Reduced Growth, Early Decline
- ( 9 ) Undetermined Pattern
- ( 8 ) Undetermined - not enough data

Maximum lung growth attained: ( 1 ) Yes ( 0 ) No

Plateau started: ( 2 ) No plateau ( 1 ) Yes ( 0 ) No

Decline started: ( 1 ) Yes ( 0 ) No

AGE AT each of the following periods (use '99' if N/A):

Maximum Lung Growth: \_\_\_\_ . \_\_\_\_

Start of Plateau: \_\_\_\_ . \_\_\_\_

Start of Decline: \_\_\_\_ . \_\_\_\_

### Pre-BD FEV1 Data and Percentiles: 1359

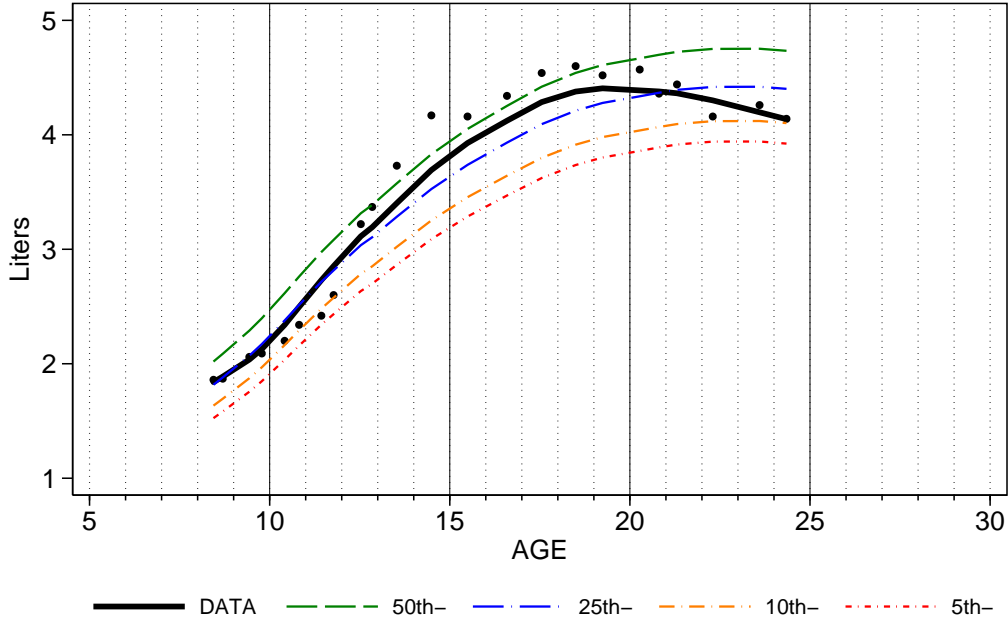

1359

**PATTERN OF GROWTH/DECLINE (Check One)**

- ( 1) Normal Growth
- ( 2) Normal Growth, Early Decline
- ( 3) Reduced Growth
- ( 4) Reduced Growth, Early Decline
- ( 9) Undetermined Pattern
- ( 8) Undetermined - not enough data

Maximum lung growth attained: ( 1) Yes ( 0) No

Plateau started: ( 2) No plateau ( 1) Yes ( 0) No

Decline started: ( 1) Yes ( 0) No

AGE AT each of the following periods (use '99' if N/A):

Maximum Lung Growth: \_\_\_\_ . \_\_\_\_

Start of Plateau: \_\_\_\_ . \_\_\_\_

Start of Decline: \_\_\_\_ . \_\_\_\_

### Pre-BD FEV1 Data and Percentiles: 1360

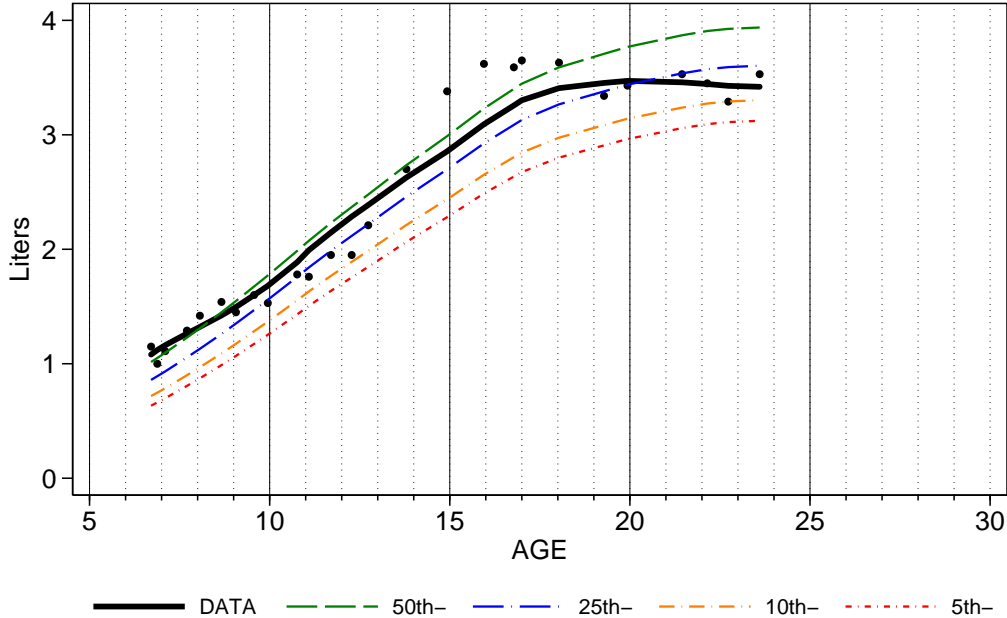

1360

**PATTERN OF GROWTH/DECLINE (Check One)**

- ( 1 ) Normal Growth
- ( 2 ) Normal Growth, Early Decline
- ( 3 ) Reduced Growth
- ( 4 ) Reduced Growth, Early Decline
- ( 9 ) Undetermined Pattern
- ( 8 ) Undetermined - not enough data

Maximum lung growth attained: ( 1 ) Yes ( 0 ) No

Plateau started: ( 2 ) No plateau ( 1 ) Yes ( 0 ) No

Decline started: ( 1 ) Yes ( 0 ) No

AGE AT each of the following periods (use '99' if N/A):

Maximum Lung Growth: \_\_\_\_ . \_\_\_\_

Start of Plateau: \_\_\_\_ . \_\_\_\_

Start of Decline: \_\_\_\_ . \_\_\_\_

### Pre-BD FEV1 Data and Percentiles: 1363

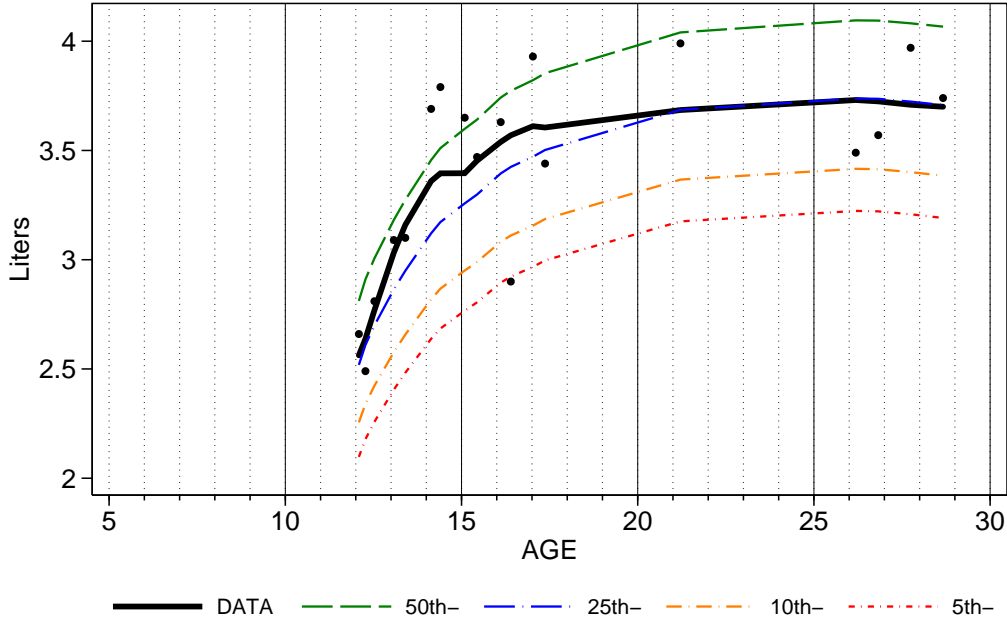

1363

**PATTERN OF GROWTH/DECLINE (Check One)**

- ( 1) Normal Growth
- ( 2) Normal Growth, Early Decline
- ( 3) Reduced Growth
- ( 4) Reduced Growth, Early Decline
- ( 9) Undetermined Pattern
- ( 8) Undetermined - not enough data

Maximum lung growth attained: ( 1) Yes ( 0) No

Plateau started: ( 2) No plateau ( 1) Yes ( 0) No

Decline started: ( 1) Yes ( 0) No

AGE AT each of the following periods (use '99' if N/A):

Maximum Lung Growth: \_\_\_\_ . \_\_\_\_

Start of Plateau: \_\_\_\_ . \_\_\_\_

Start of Decline: \_\_\_\_ . \_\_\_\_

### Pre-BD FEV1 Data and Percentiles: 1369

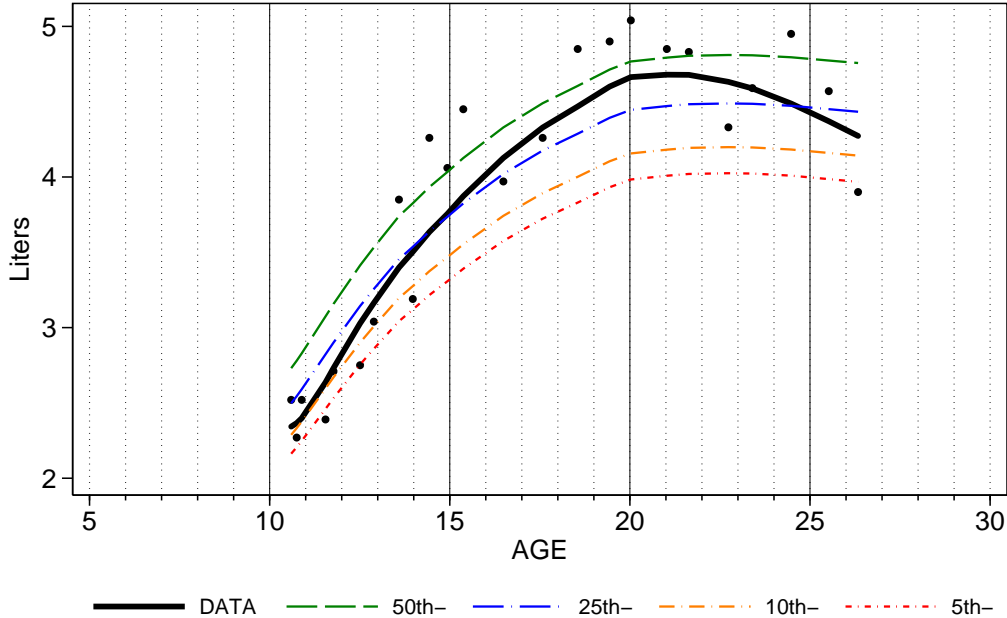

1369

**PATTERN OF GROWTH/DECLINE (Check One)**

- ( 1) Normal Growth
- ( 2) Normal Growth, Early Decline
- ( 3) Reduced Growth
- ( 4) Reduced Growth, Early Decline
- ( 9) Undetermined Pattern
- ( 8) Undetermined - not enough data

Maximum lung growth attained: ( 1) Yes ( 0) No

Plateau started: ( 2) No plateau ( 1) Yes ( 0) No

Decline started: ( 1) Yes ( 0) No

AGE AT each of the following periods (use '99' if N/A):

Maximum Lung Growth: \_\_\_\_ . \_\_\_\_

Start of Plateau: \_\_\_\_ . \_\_\_\_

Start of Decline: \_\_\_\_ . \_\_\_\_

### Pre-BD FEV1 Data and Percentiles: 1380

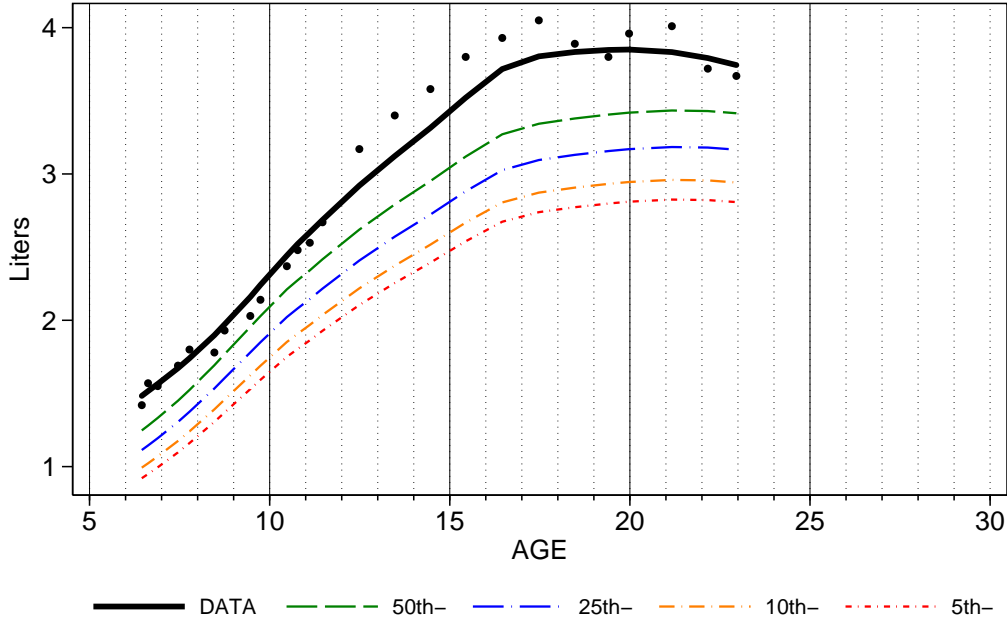

1380

**PATTERN OF GROWTH/DECLINE (Check One)**

- ( 1) Normal Growth
- ( 2) Normal Growth, Early Decline
- ( 3) Reduced Growth
- ( 4) Reduced Growth, Early Decline
- ( 9) Undetermined Pattern
- ( 8) Undetermined - not enough data

Maximum lung growth attained: ( 1) Yes ( 0) No

Plateau started: ( 2) No plateau ( 1) Yes ( 0) No

Decline started: ( 1) Yes ( 0) No

AGE AT each of the following periods (use '99' if N/A):

Maximum Lung Growth: \_\_\_\_ . \_\_\_\_

Start of Plateau: \_\_\_\_ . \_\_\_\_

Start of Decline: \_\_\_\_ . \_\_\_\_

### Pre-BD FEV1 Data and Percentiles: 1381

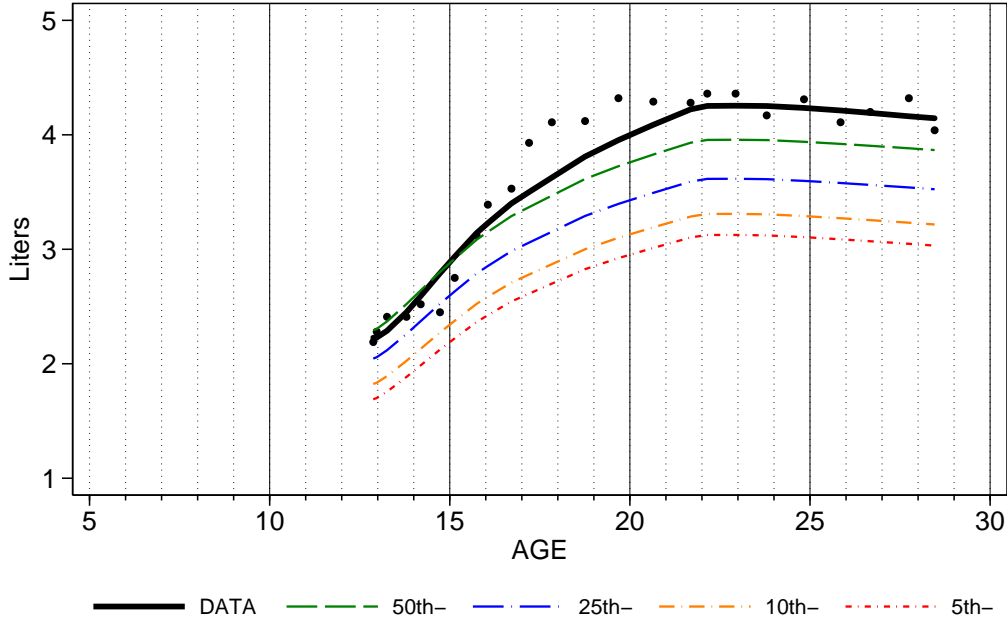

1381

**PATTERN OF GROWTH/DECLINE (Check One)**

- ( 1) Normal Growth
- ( 2) Normal Growth, Early Decline
- ( 3) Reduced Growth
- ( 4) Reduced Growth, Early Decline
- ( 9) Undetermined Pattern
- ( 8) Undetermined - not enough data

Maximum lung growth attained: ( 1) Yes ( 0) No

Plateau started: ( 2) No plateau ( 1) Yes ( 0) No

Decline started: ( 1) Yes ( 0) No

AGE AT each of the following periods (use '99' if N/A):

Maximum Lung Growth: \_\_\_\_ . \_\_\_\_

Start of Plateau: \_\_\_\_ . \_\_\_\_

Start of Decline: \_\_\_\_ . \_\_\_\_



### Pre-BD FEV1 Data and Percentiles: 1386

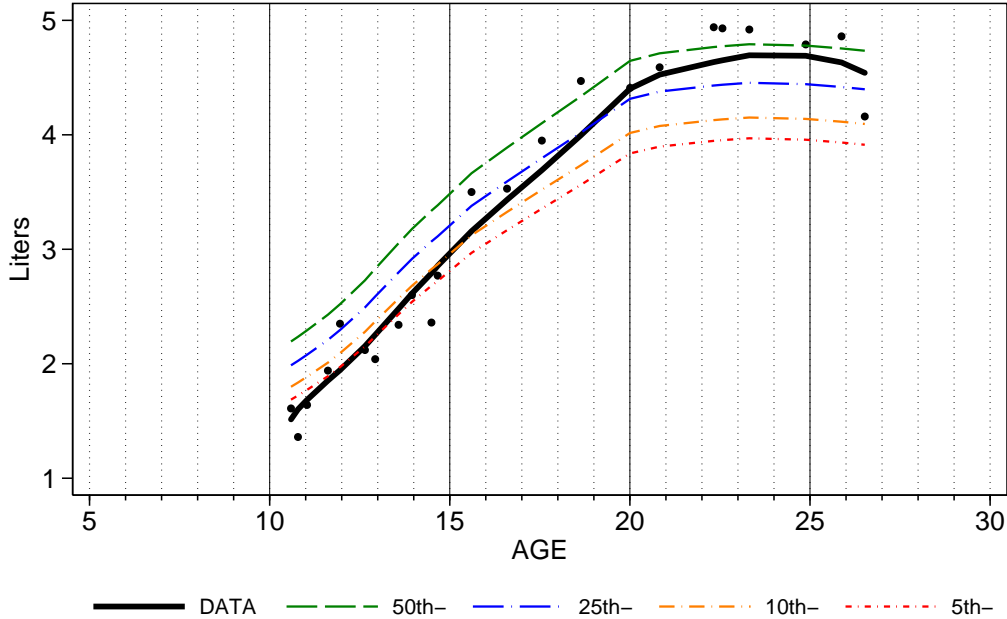

1386

**PATTERN OF GROWTH/DECLINE (Check One)**

- ( 1) Normal Growth
- ( 2) Normal Growth, Early Decline
- ( 3) Reduced Growth
- ( 4) Reduced Growth, Early Decline
- ( 9) Undetermined Pattern
- ( 8) Undetermined - not enough data

Maximum lung growth attained: ( 1) Yes ( 0) No

Plateau started: ( 2) No plateau ( 1) Yes ( 0) No

Decline started: ( 1) Yes ( 0) No

AGE AT each of the following periods (use '99' if N/A):

Maximum Lung Growth: \_\_\_\_ . \_\_\_\_

Start of Plateau: \_\_\_\_ . \_\_\_\_

Start of Decline: \_\_\_\_ . \_\_\_\_

### Pre-BD FEV1 Data and Percentiles: 1391

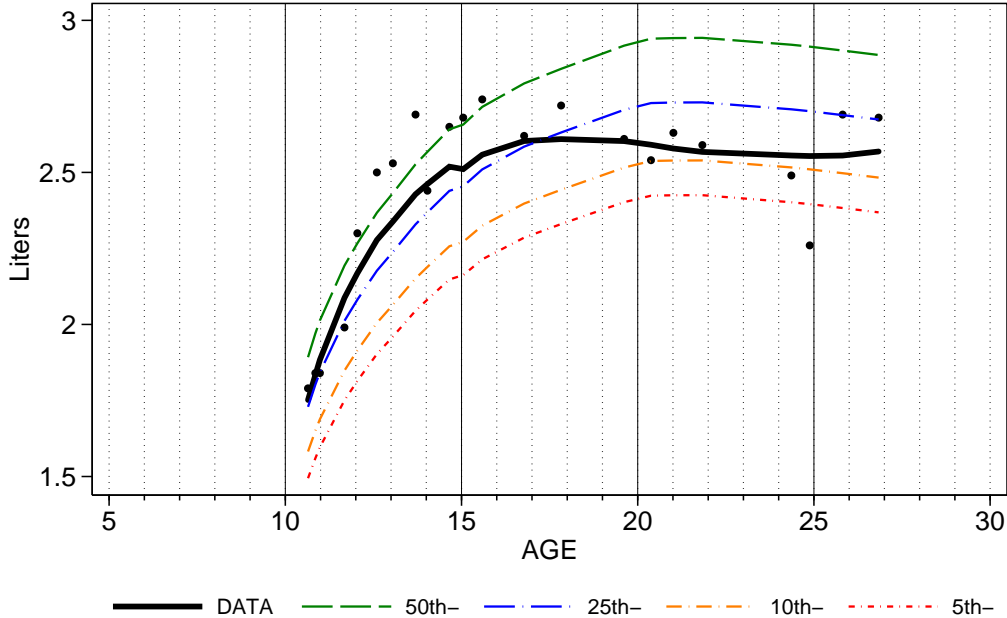

1391

**PATTERN OF GROWTH/DECLINE (Check One)**

- ( 1) Normal Growth
- ( 2) Normal Growth, Early Decline
- ( 3) Reduced Growth
- ( 4) Reduced Growth, Early Decline
- ( 9) Undetermined Pattern
- ( 8) Undetermined - not enough data

Maximum lung growth attained: ( 1) Yes ( 0) No

Plateau started: ( 2) No plateau ( 1) Yes ( 0) No

Decline started: ( 1) Yes ( 0) No

AGE AT each of the following periods (use '99' if N/A):

Maximum Lung Growth: \_\_\_\_ . \_\_\_\_

Start of Plateau: \_\_\_\_ . \_\_\_\_

Start of Decline: \_\_\_\_ . \_\_\_\_

### Pre-BD FEV1 Data and Percentiles: 1397

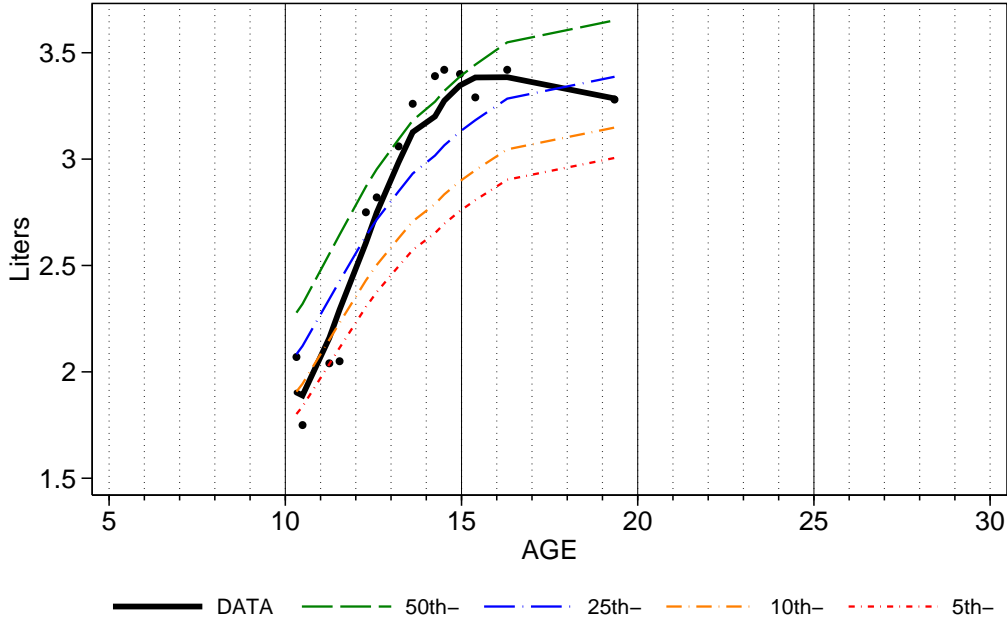

1397

**PATTERN OF GROWTH/DECLINE (Check One)**

- ( 1) Normal Growth
- ( 2) Normal Growth, Early Decline
- ( 3) Reduced Growth
- ( 4) Reduced Growth, Early Decline
- ( 9) Undetermined Pattern
- ( 8) Undetermined - not enough data

Maximum lung growth attained: ( 1) Yes ( 0) No

Plateau started: ( 2) No plateau ( 1) Yes ( 0) No

Decline started: ( 1) Yes ( 0) No

AGE AT each of the following periods (use '99' if N/A):

Maximum Lung Growth: \_\_\_\_ . \_\_\_\_

Start of Plateau: \_\_\_\_ . \_\_\_\_

Start of Decline: \_\_\_\_ . \_\_\_\_

### Pre-BD FEV1 Data and Percentiles: 1398

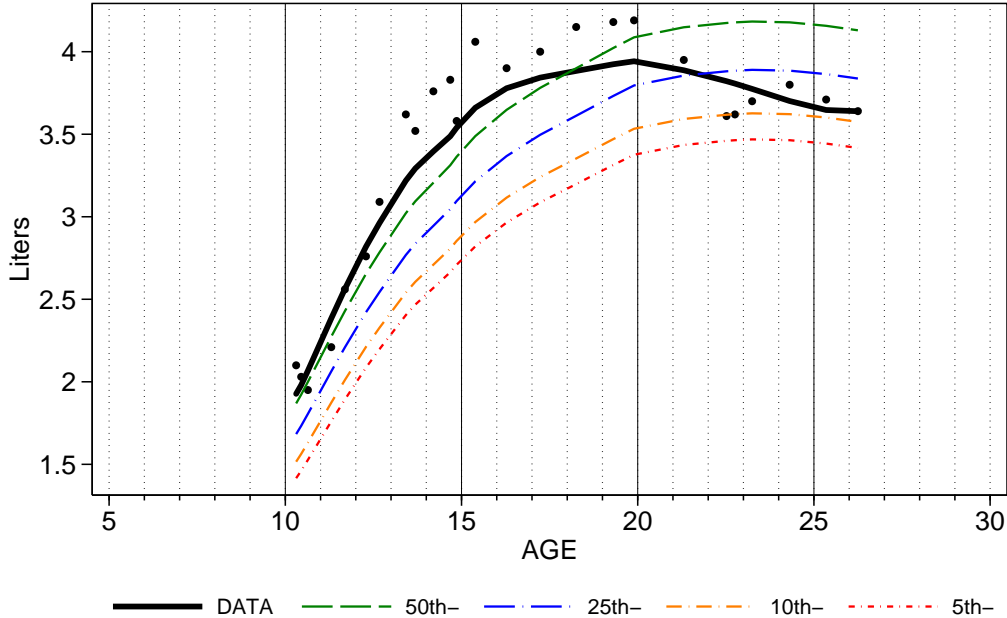

1398

**PATTERN OF GROWTH/DECLINE (Check One)**

- ( 1) Normal Growth
- ( 2) Normal Growth, Early Decline
- ( 3) Reduced Growth
- ( 4) Reduced Growth, Early Decline
- ( 9) Undetermined Pattern
- ( 8) Undetermined - not enough data

Maximum lung growth attained: ( 1) Yes ( 0) No

Plateau started: ( 2) No plateau ( 1) Yes ( 0) No

Decline started: ( 1) Yes ( 0) No

AGE AT each of the following periods (use '99' if N/A):

Maximum Lung Growth: \_\_\_\_ . \_\_\_\_

Start of Plateau: \_\_\_\_ . \_\_\_\_

Start of Decline: \_\_\_\_ . \_\_\_\_

### Pre-BD FEV1 Data and Percentiles: 1402

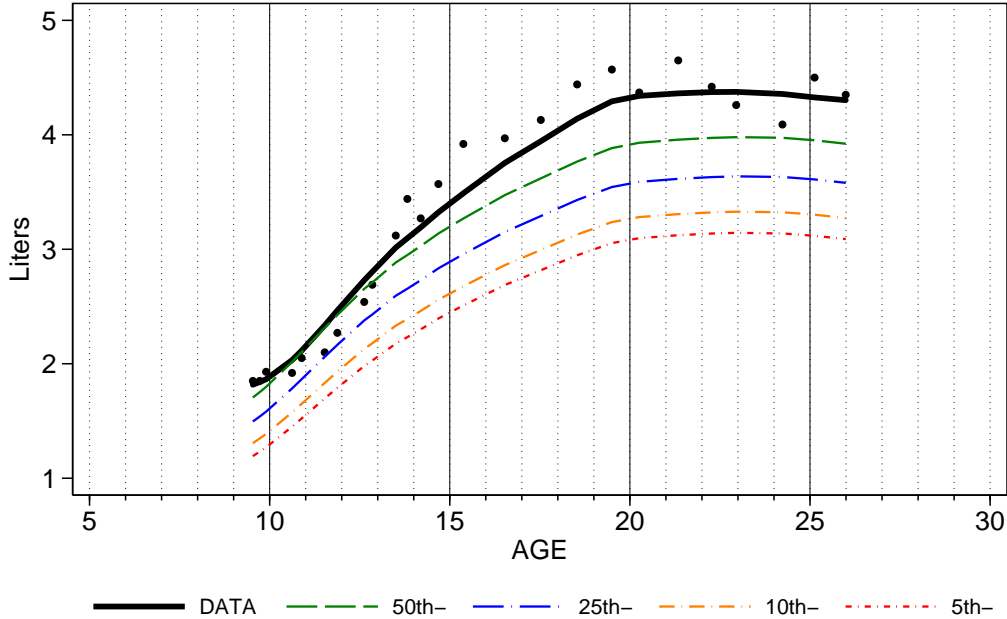

1402

**PATTERN OF GROWTH/DECLINE (Check One)**

- ( 1 ) Normal Growth
- ( 2 ) Normal Growth, Early Decline
- ( 3 ) Reduced Growth
- ( 4 ) Reduced Growth, Early Decline
- ( 9 ) Undetermined Pattern
- ( 8 ) Undetermined - not enough data

Maximum lung growth attained: ( 1 ) Yes ( 0 ) No

Plateau started: ( 2 ) No plateau ( 1 ) Yes ( 0 ) No

Decline started: ( 1 ) Yes ( 0 ) No

AGE AT each of the following periods (use '99' if N/A):

Maximum Lung Growth: \_\_\_\_ . \_\_\_\_

Start of Plateau: \_\_\_\_ . \_\_\_\_

Start of Decline: \_\_\_\_ . \_\_\_\_

### Pre-BD FEV1 Data and Percentiles: 1410

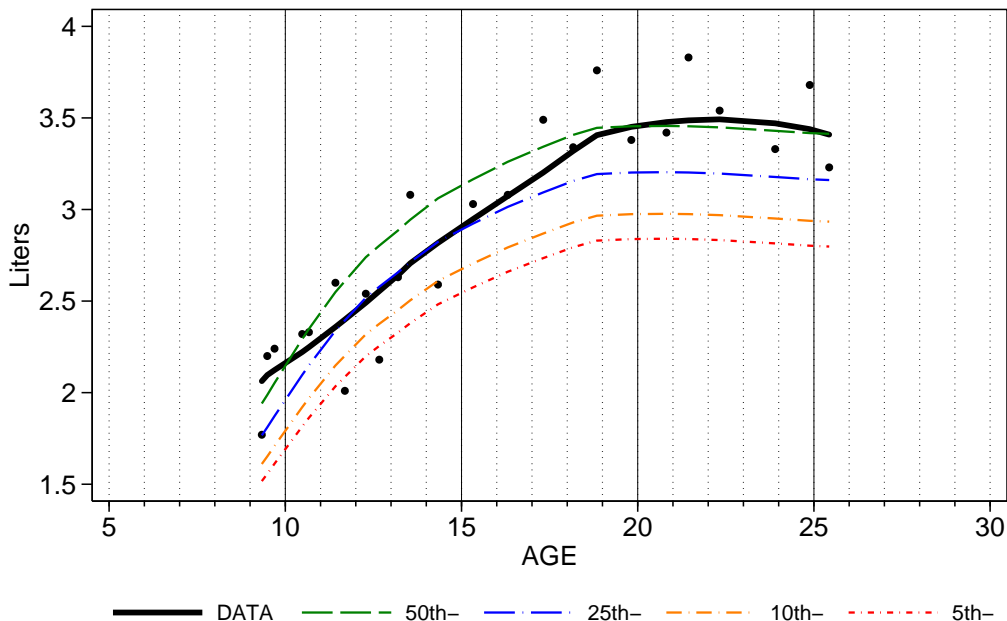

1410

**PATTERN OF GROWTH/DECLINE (Check One)**

- ( 1) Normal Growth
- ( 2) Normal Growth, Early Decline
- ( 3) Reduced Growth
- ( 4) Reduced Growth, Early Decline
- ( 9) Undetermined Pattern
- ( 8) Undetermined - not enough data

Maximum lung growth attained: ( 1) Yes ( 0) No

Plateau started: ( 2) No plateau ( 1) Yes ( 0) No

Decline started: ( 1) Yes ( 0) No

AGE AT each of the following periods (use '99' if N/A):

Maximum Lung Growth: \_\_\_\_ . \_\_\_\_

Start of Plateau: \_\_\_\_ . \_\_\_\_

Start of Decline: \_\_\_\_ . \_\_\_\_

### Pre-BD FEV1 Data and Percentiles: 1413

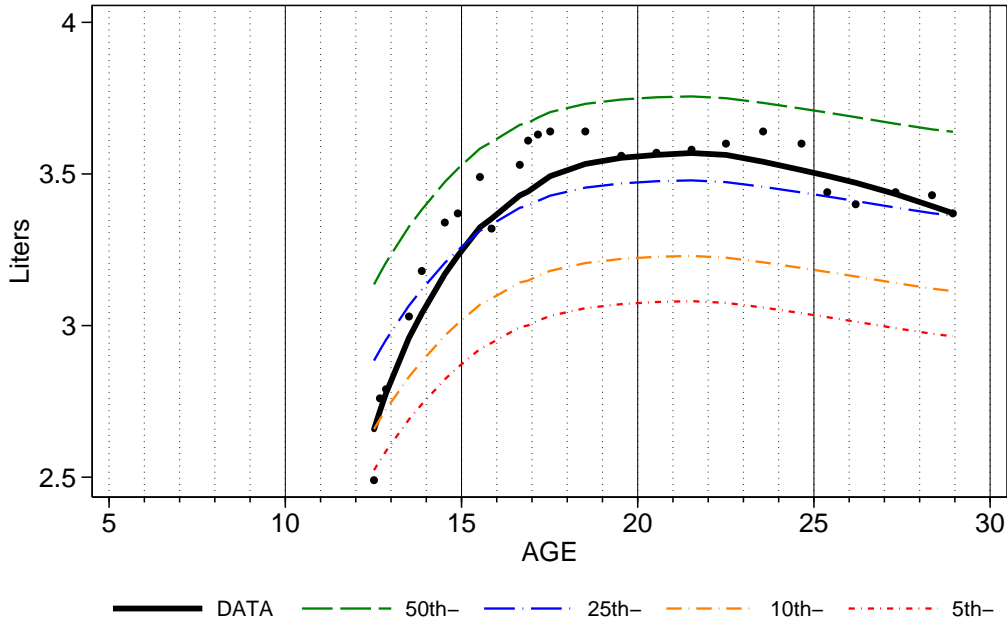

1413

**PATTERN OF GROWTH/DECLINE (Check One)**

- ( 1) Normal Growth
- ( 2) Normal Growth, Early Decline
- ( 3) Reduced Growth
- ( 4) Reduced Growth, Early Decline
- ( 9) Undetermined Pattern
- ( 8) Undetermined - not enough data

Maximum lung growth attained: ( 1) Yes ( 0) No

Plateau started: ( 2) No plateau ( 1) Yes ( 0) No

Decline started: ( 1) Yes ( 0) No

AGE AT each of the following periods (use '99' if N/A):

Maximum Lung Growth: \_\_\_\_ . \_\_\_\_

Start of Plateau: \_\_\_\_ . \_\_\_\_

Start of Decline: \_\_\_\_ . \_\_\_\_

### Pre-BD FEV1 Data and Percentiles: 1416

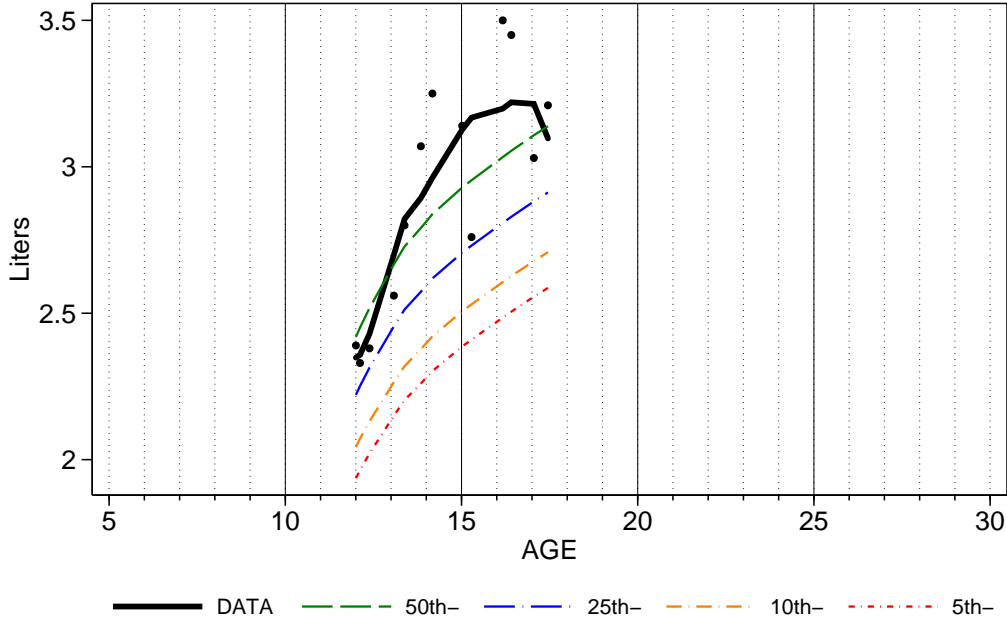

1416

**PATTERN OF GROWTH/DECLINE (Check One)**

- ( 1) Normal Growth
- ( 2) Normal Growth, Early Decline
- ( 3) Reduced Growth
- ( 4) Reduced Growth, Early Decline
- ( 9) Undetermined Pattern
- ( 8) Undetermined - not enough data

Maximum lung growth attained: ( 1) Yes ( 0) No

Plateau started: ( 2) No plateau ( 1) Yes ( 0) No

Decline started: ( 1) Yes ( 0) No

AGE AT each of the following periods (use '99' if N/A):

Maximum Lung Growth: \_\_\_\_ . \_\_\_\_

Start of Plateau: \_\_\_\_ . \_\_\_\_

Start of Decline: \_\_\_\_ . \_\_\_\_



### Pre-BD FEV1 Data and Percentiles: 1419

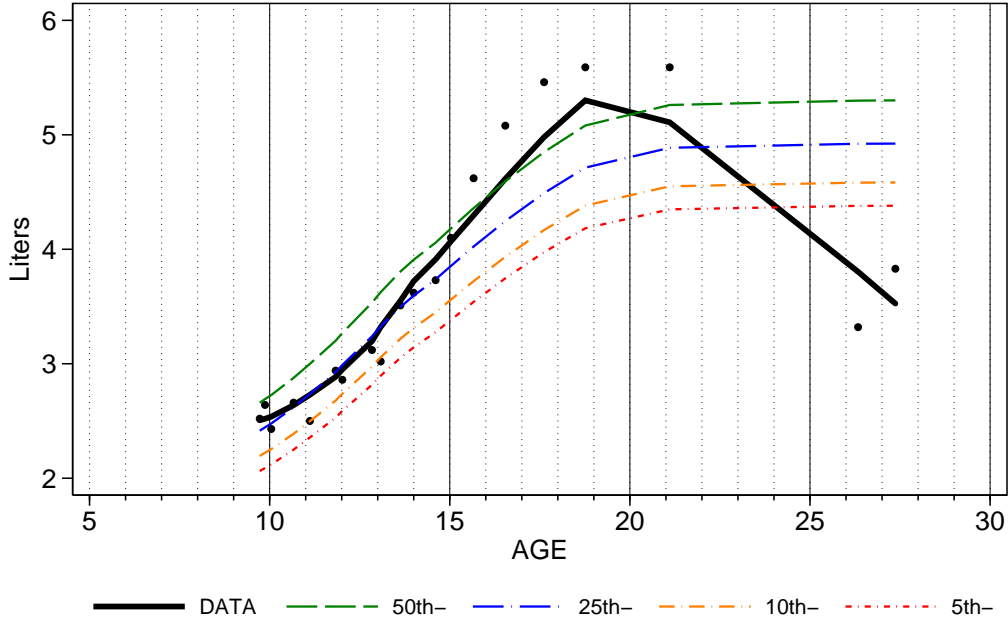

1419

**PATTERN OF GROWTH/DECLINE (Check One)**

- ( 1) Normal Growth
- ( 2) Normal Growth, Early Decline
- ( 3) Reduced Growth
- ( 4) Reduced Growth, Early Decline
- ( 9) Undetermined Pattern
- ( 8) Undetermined - not enough data

Maximum lung growth attained: ( 1) Yes ( 0) No

Plateau started: ( 2) No plateau ( 1) Yes ( 0) No

Decline started: ( 1) Yes ( 0) No

AGE AT each of the following periods (use '99' if N/A):

Maximum Lung Growth: \_\_\_\_ . \_\_\_\_

Start of Plateau: \_\_\_\_ . \_\_\_\_

Start of Decline: \_\_\_\_ . \_\_\_\_

### Pre-BD FEV1 Data and Percentiles: 1423

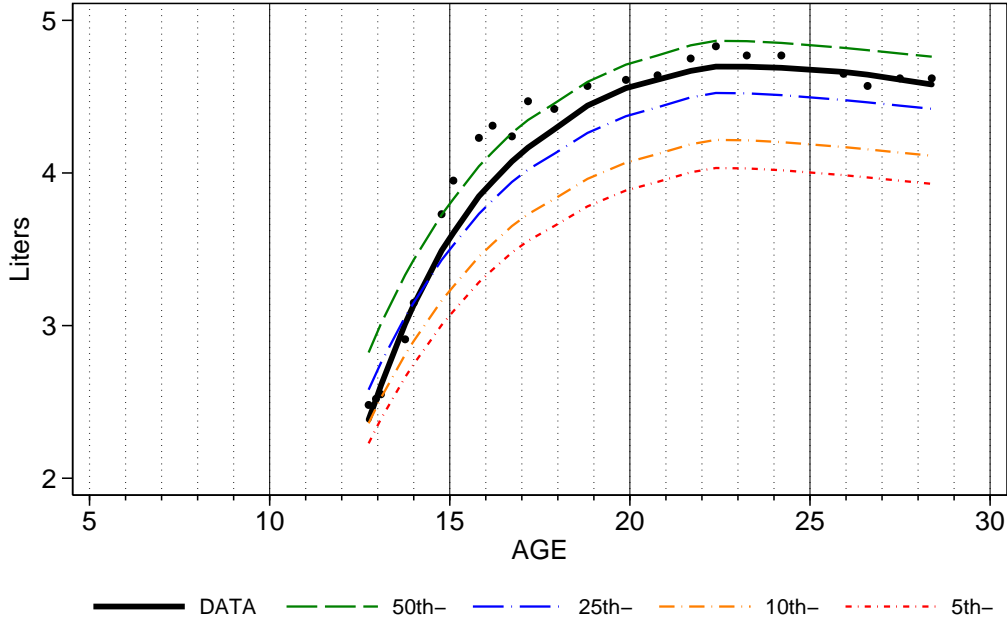

1423

**PATTERN OF GROWTH/DECLINE (Check One)**

- ( 1) Normal Growth
- ( 2) Normal Growth, Early Decline
- ( 3) Reduced Growth
- ( 4) Reduced Growth, Early Decline
- ( 9) Undetermined Pattern
- ( 8) Undetermined - not enough data

Maximum lung growth attained: ( 1) Yes ( 0) No

Plateau started: ( 2) No plateau ( 1) Yes ( 0) No

Decline started: ( 1) Yes ( 0) No

AGE AT each of the following periods (use '99' if N/A):

Maximum Lung Growth: \_\_\_\_ . \_\_\_\_

Start of Plateau: \_\_\_\_ . \_\_\_\_

Start of Decline: \_\_\_\_ . \_\_\_\_

### Pre-BD FEV1 Data and Percentiles: 1427

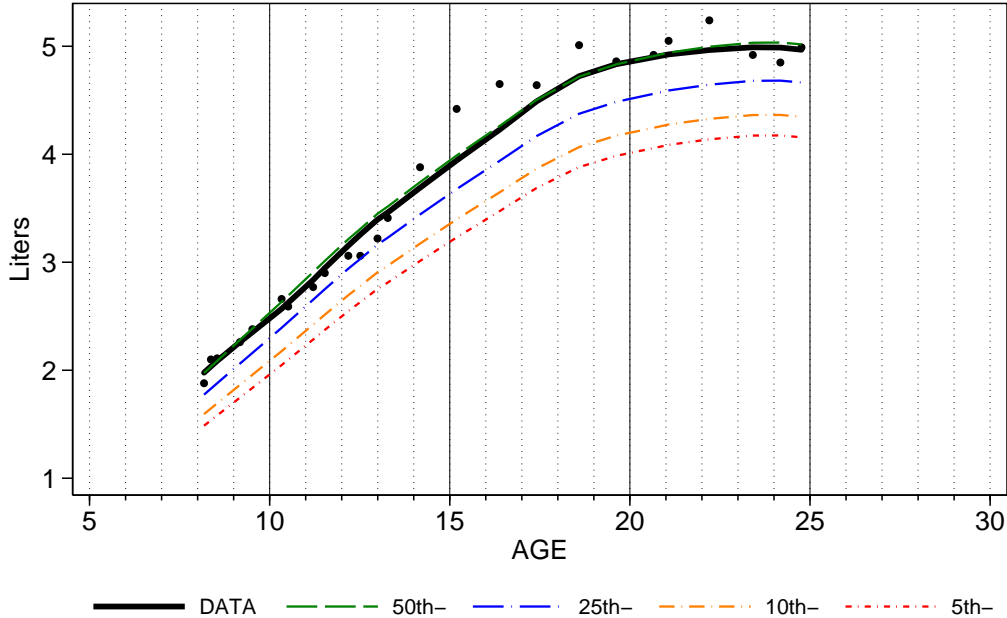

1427

**PATTERN OF GROWTH/DECLINE (Check One)**

- ( 1 ) Normal Growth
- ( 2 ) Normal Growth, Early Decline
- ( 3 ) Reduced Growth
- ( 4 ) Reduced Growth, Early Decline
- ( 9 ) Undetermined Pattern
- ( 8 ) Undetermined - not enough data

Maximum lung growth attained: ( 1 ) Yes ( 0 ) No

Plateau started: ( 2 ) No plateau ( 1 ) Yes ( 0 ) No

Decline started: ( 1 ) Yes ( 0 ) No

AGE AT each of the following periods (use '99' if N/A):

Maximum Lung Growth: \_\_\_\_ . \_\_\_\_

Start of Plateau: \_\_\_\_ . \_\_\_\_

Start of Decline: \_\_\_\_ . \_\_\_\_

### Pre-BD FEV1 Data and Percentiles: 1431

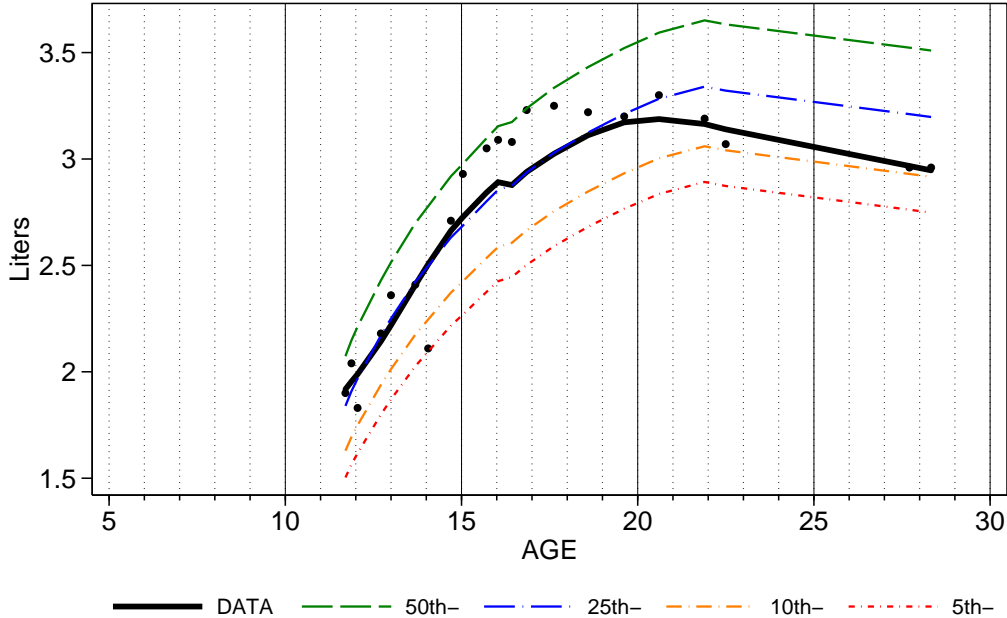

1431

**PATTERN OF GROWTH/DECLINE (Check One)**

- ( 1) Normal Growth
- ( 2) Normal Growth, Early Decline
- ( 3) Reduced Growth
- ( 4) Reduced Growth, Early Decline
- ( 9) Undetermined Pattern
- ( 8) Undetermined - not enough data

Maximum lung growth attained: ( 1) Yes ( 0) No

Plateau started: ( 2) No plateau ( 1) Yes ( 0) No

Decline started: ( 1) Yes ( 0) No

AGE AT each of the following periods (use '99' if N/A):

Maximum Lung Growth: \_\_\_\_ . \_\_\_\_

Start of Plateau: \_\_\_\_ . \_\_\_\_

Start of Decline: \_\_\_\_ . \_\_\_\_

### Pre-BD FEV1 Data and Percentiles: 1439

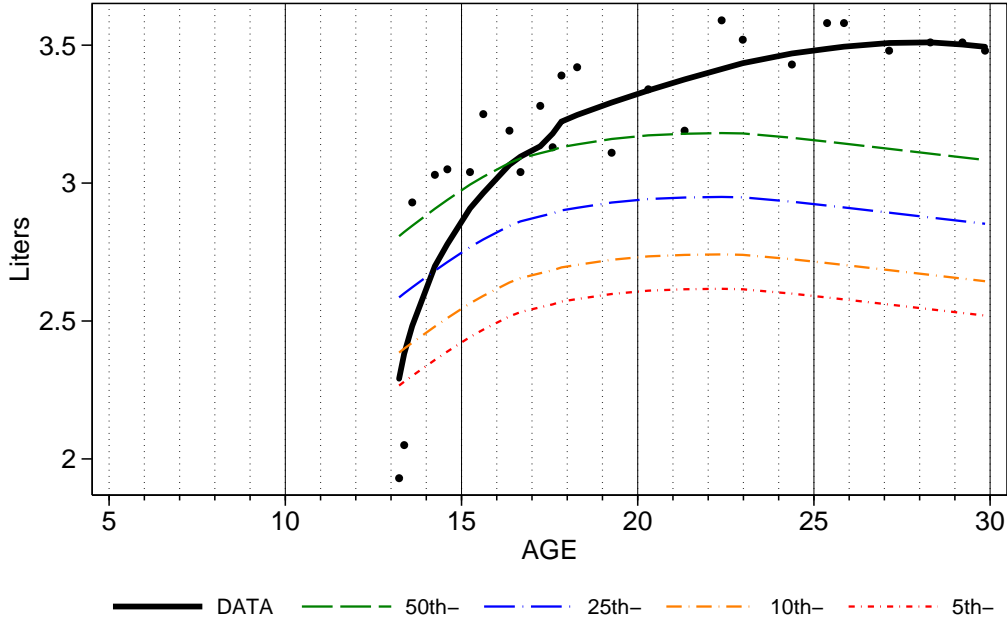

1439

**PATTERN OF GROWTH/DECLINE (Check One)**

- ( 1) Normal Growth
- ( 2) Normal Growth, Early Decline
- ( 3) Reduced Growth
- ( 4) Reduced Growth, Early Decline
- ( 9) Undetermined Pattern
- ( 8) Undetermined - not enough data

Maximum lung growth attained: ( 1) Yes ( 0) No

Plateau started: ( 2) No plateau ( 1) Yes ( 0) No

Decline started: ( 1) Yes ( 0) No

AGE AT each of the following periods (use '99' if N/A):

Maximum Lung Growth: \_\_\_\_ . \_\_\_\_

Start of Plateau: \_\_\_\_ . \_\_\_\_

Start of Decline: \_\_\_\_ . \_\_\_\_

### Pre-BD FEV1 Data and Percentiles: 1448

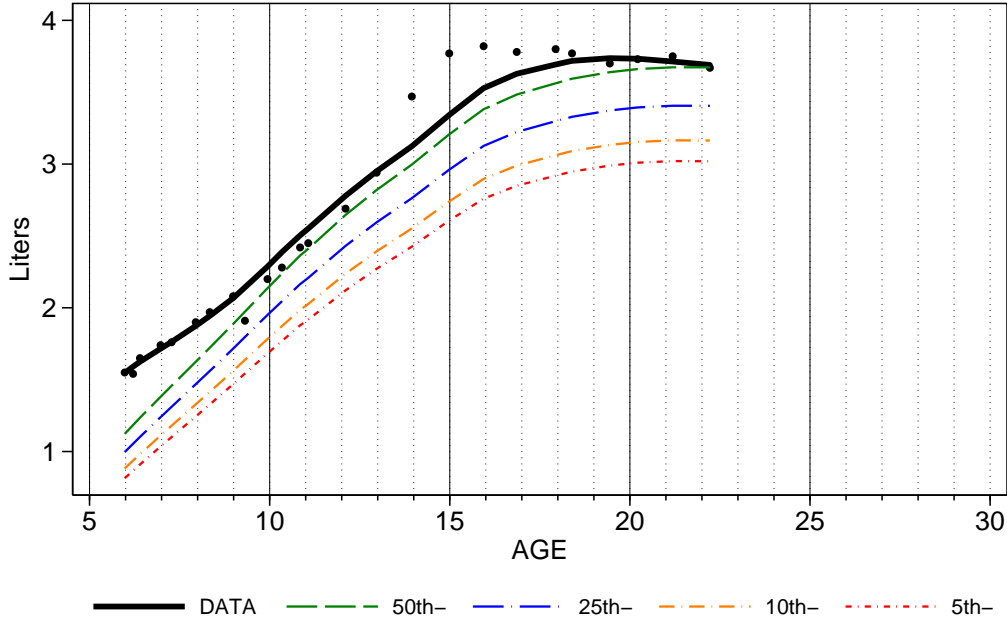

1448

**PATTERN OF GROWTH/DECLINE (Check One)**

- ( 1) Normal Growth
- ( 2) Normal Growth, Early Decline
- ( 3) Reduced Growth
- ( 4) Reduced Growth, Early Decline
- ( 9) Undetermined Pattern
- ( 8) Undetermined - not enough data

Maximum lung growth attained: ( 1) Yes ( 0) No

Plateau started: ( 2) No plateau ( 1) Yes ( 0) No

Decline started: ( 1) Yes ( 0) No

AGE AT each of the following periods (use '99' if N/A):

Maximum Lung Growth: \_\_\_\_ . \_\_\_\_

Start of Plateau: \_\_\_\_ . \_\_\_\_

Start of Decline: \_\_\_\_ . \_\_\_\_

### Pre-BD FEV1 Data and Percentiles: 1458

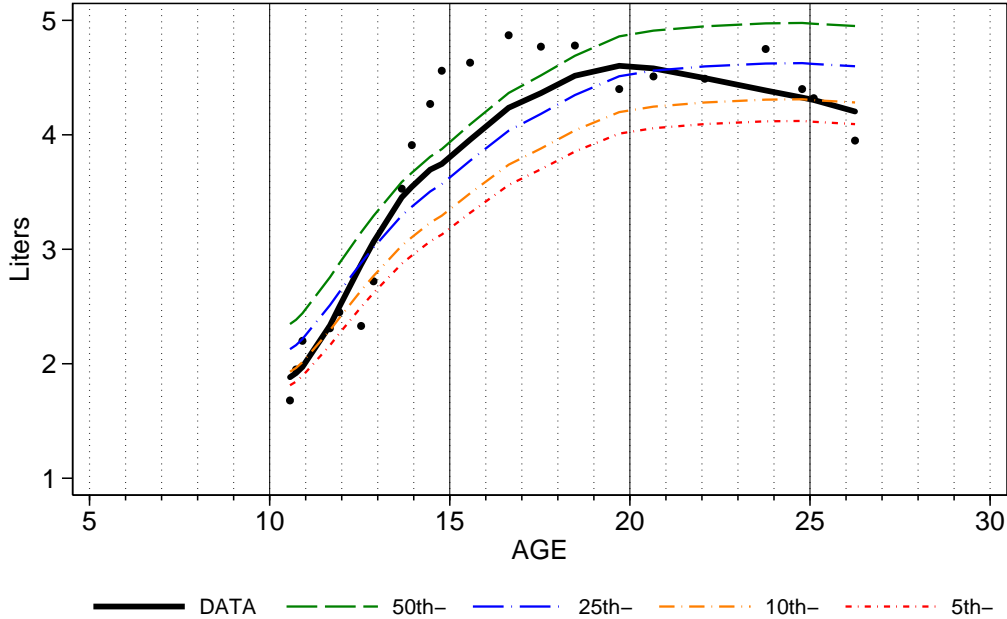

1458

**PATTERN OF GROWTH/DECLINE (Check One)**

- ( 1) Normal Growth
- ( 2) Normal Growth, Early Decline
- ( 3) Reduced Growth
- ( 4) Reduced Growth, Early Decline
- ( 9) Undetermined Pattern
- ( 8) Undetermined - not enough data

Maximum lung growth attained: ( 1) Yes ( 0) No

Plateau started: ( 2) No plateau ( 1) Yes ( 0) No

Decline started: ( 1) Yes ( 0) No

AGE AT each of the following periods (use '99' if N/A):

Maximum Lung Growth: \_\_\_\_ . \_\_\_\_

Start of Plateau: \_\_\_\_ . \_\_\_\_

Start of Decline: \_\_\_\_ . \_\_\_\_

### Pre-BD FEV1 Data and Percentiles: 1462

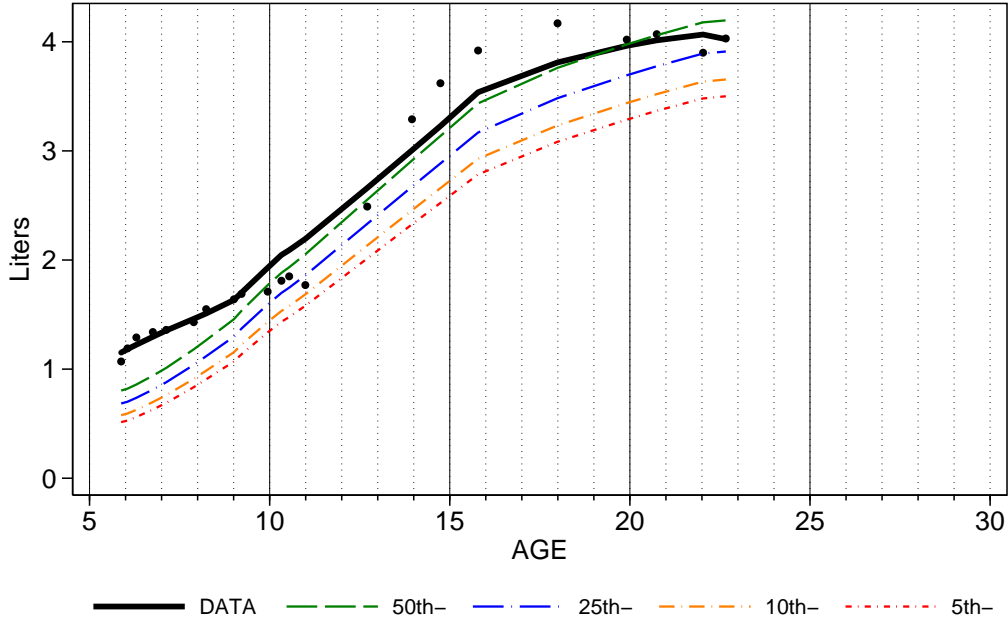

1462

**PATTERN OF GROWTH/DECLINE (Check One)**

- ( 1) Normal Growth
- ( 2) Normal Growth, Early Decline
- ( 3) Reduced Growth
- ( 4) Reduced Growth, Early Decline
- ( 9) Undetermined Pattern
- ( 8) Undetermined - not enough data

Maximum lung growth attained: ( 1) Yes ( 0) No

Plateau started: ( 2) No plateau ( 1) Yes ( 0) No

Decline started: ( 1) Yes ( 0) No

AGE AT each of the following periods (use '99' if N/A):

Maximum Lung Growth: \_\_\_\_ . \_\_\_\_

Start of Plateau: \_\_\_\_ . \_\_\_\_

Start of Decline: \_\_\_\_ . \_\_\_\_



### Pre-BD FEV1 Data and Percentiles: 1464

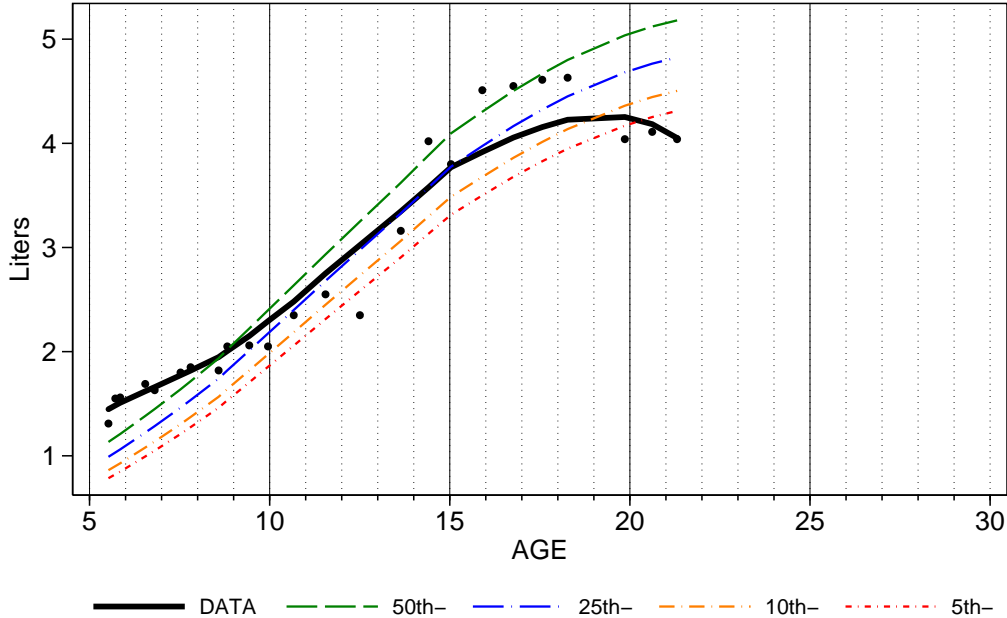

1464

**PATTERN OF GROWTH/DECLINE (Check One)**

- ( 1 ) Normal Growth
- ( 2 ) Normal Growth, Early Decline
- ( 3 ) Reduced Growth
- ( 4 ) Reduced Growth, Early Decline
- ( 9 ) Undetermined Pattern
- ( 8 ) Undetermined - not enough data

Maximum lung growth attained: ( 1 ) Yes ( 0 ) No

Plateau started: ( 2 ) No plateau ( 1 ) Yes ( 0 ) No

Decline started: ( 1 ) Yes ( 0 ) No

AGE AT each of the following periods (use '99' if N/A):

Maximum Lung Growth: \_\_\_\_ . \_\_\_\_

Start of Plateau: \_\_\_\_ . \_\_\_\_

Start of Decline: \_\_\_\_ . \_\_\_\_

### Pre-BD FEV1 Data and Percentiles: 1470

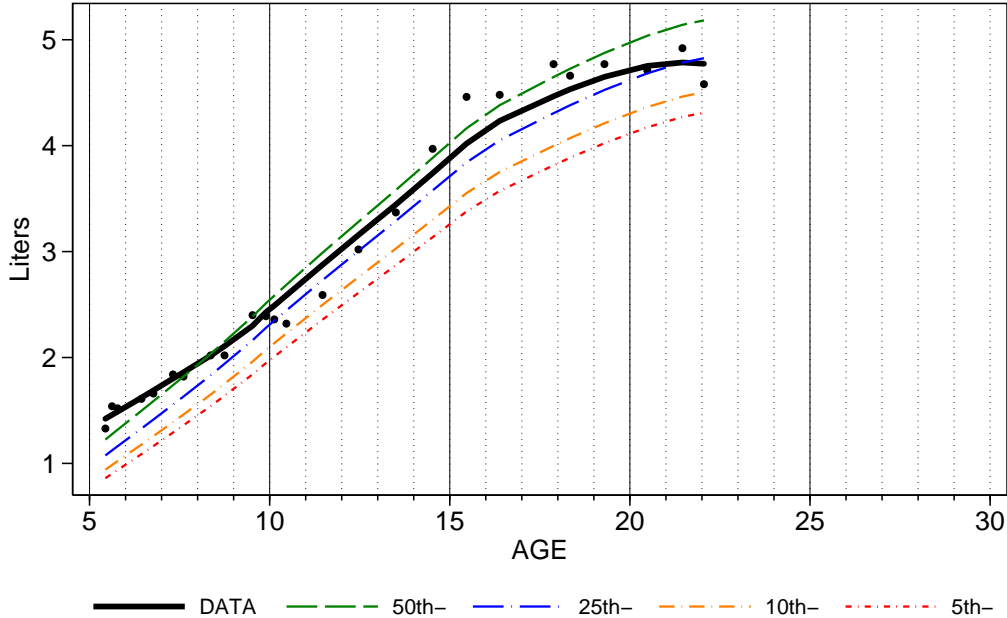

1470

**PATTERN OF GROWTH/DECLINE (Check One)**

- ( 1) Normal Growth
- ( 2) Normal Growth, Early Decline
- ( 3) Reduced Growth
- ( 4) Reduced Growth, Early Decline
- ( 9) Undetermined Pattern
- ( 8) Undetermined - not enough data

Maximum lung growth attained: ( 1) Yes ( 0) No

Plateau started: ( 2) No plateau ( 1) Yes ( 0) No

Decline started: ( 1) Yes ( 0) No

AGE AT each of the following periods (use '99' if N/A):

Maximum Lung Growth: \_\_\_\_ . \_\_\_\_

Start of Plateau: \_\_\_\_ . \_\_\_\_

Start of Decline: \_\_\_\_ . \_\_\_\_

### Pre-BD FEV1 Data and Percentiles: 1472

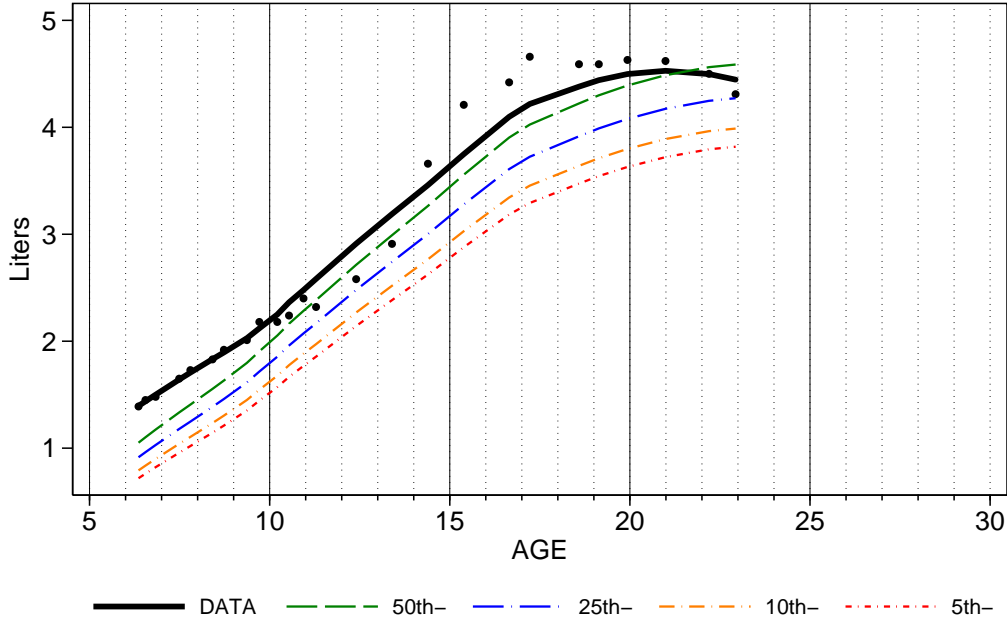

1472

**PATTERN OF GROWTH/DECLINE (Check One)**

- ( 1) Normal Growth
- ( 2) Normal Growth, Early Decline
- ( 3) Reduced Growth
- ( 4) Reduced Growth, Early Decline
- ( 9) Undetermined Pattern
- ( 8) Undetermined - not enough data

Maximum lung growth attained: ( 1) Yes ( 0) No

Plateau started: ( 2) No plateau ( 1) Yes ( 0) No

Decline started: ( 1) Yes ( 0) No

AGE AT each of the following periods (use '99' if N/A):

Maximum Lung Growth: \_\_\_\_ . \_\_\_\_

Start of Plateau: \_\_\_\_ . \_\_\_\_

Start of Decline: \_\_\_\_ . \_\_\_\_

### Pre-BD FEV1 Data and Percentiles: 1482

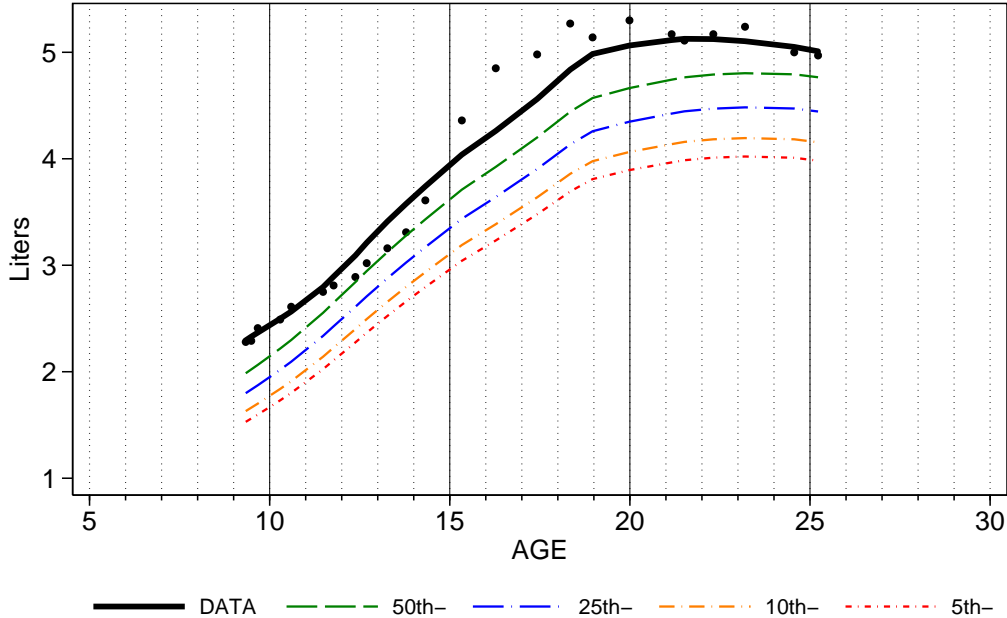

1482

**PATTERN OF GROWTH/DECLINE (Check One)**

- ( 1 ) Normal Growth
- ( 2 ) Normal Growth, Early Decline
- ( 3 ) Reduced Growth
- ( 4 ) Reduced Growth, Early Decline
- ( 9 ) Undetermined Pattern
- ( 8 ) Undetermined - not enough data

Maximum lung growth attained: ( 1 ) Yes ( 0 ) No

Plateau started: ( 2 ) No plateau ( 1 ) Yes ( 0 ) No

Decline started: ( 1 ) Yes ( 0 ) No

AGE AT each of the following periods (use '99' if N/A):

Maximum Lung Growth: \_\_\_\_ . \_\_\_\_

Start of Plateau: \_\_\_\_ . \_\_\_\_

Start of Decline: \_\_\_\_ . \_\_\_\_

### Pre-BD FEV1 Data and Percentiles: 1489

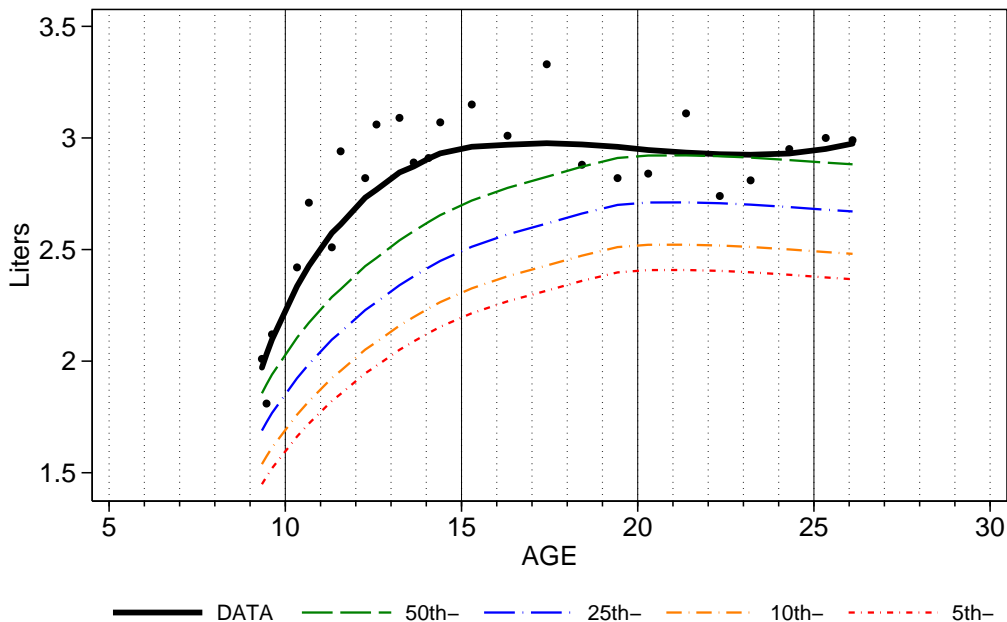

1489

**PATTERN OF GROWTH/DECLINE (Check One)**

- ( 1 ) Normal Growth
- ( 2 ) Normal Growth, Early Decline
- ( 3 ) Reduced Growth
- ( 4 ) Reduced Growth, Early Decline
- ( 9 ) Undetermined Pattern
- ( 8 ) Undetermined - not enough data

Maximum lung growth attained: ( 1 ) Yes ( 0 ) No

Plateau started: ( 2 ) No plateau ( 1 ) Yes ( 0 ) No

Decline started: ( 1 ) Yes ( 0 ) No

AGE AT each of the following periods (use '99' if N/A):

Maximum Lung Growth: \_\_\_\_ . \_\_\_\_

Start of Plateau: \_\_\_\_ . \_\_\_\_

Start of Decline: \_\_\_\_ . \_\_\_\_

### Pre-BD FEV1 Data and Percentiles: 1494

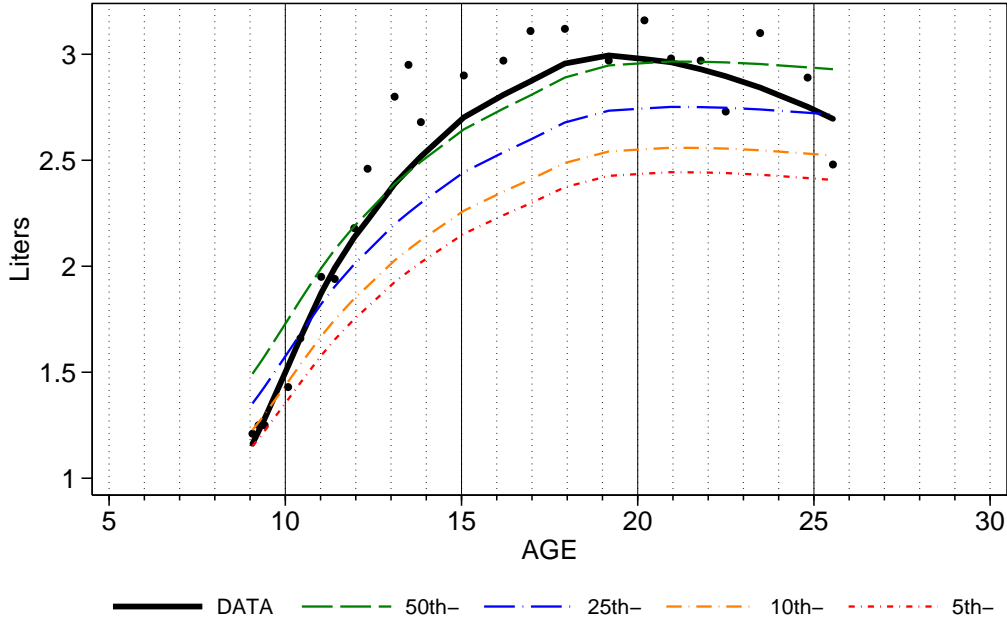

1494

**PATTERN OF GROWTH/DECLINE (Check One)**

- ( 1) Normal Growth
- ( 2) Normal Growth, Early Decline
- ( 3) Reduced Growth
- ( 4) Reduced Growth, Early Decline
- ( 9) Undetermined Pattern
- ( 8) Undetermined - not enough data

Maximum lung growth attained: ( 1) Yes ( 0) No

Plateau started: ( 2) No plateau ( 1) Yes ( 0) No

Decline started: ( 1) Yes ( 0) No

AGE AT each of the following periods (use '99' if N/A):

Maximum Lung Growth: \_\_\_\_ . \_\_\_\_

Start of Plateau: \_\_\_\_ . \_\_\_\_

Start of Decline: \_\_\_\_ . \_\_\_\_

### Pre-BD FEV1 Data and Percentiles: 1498

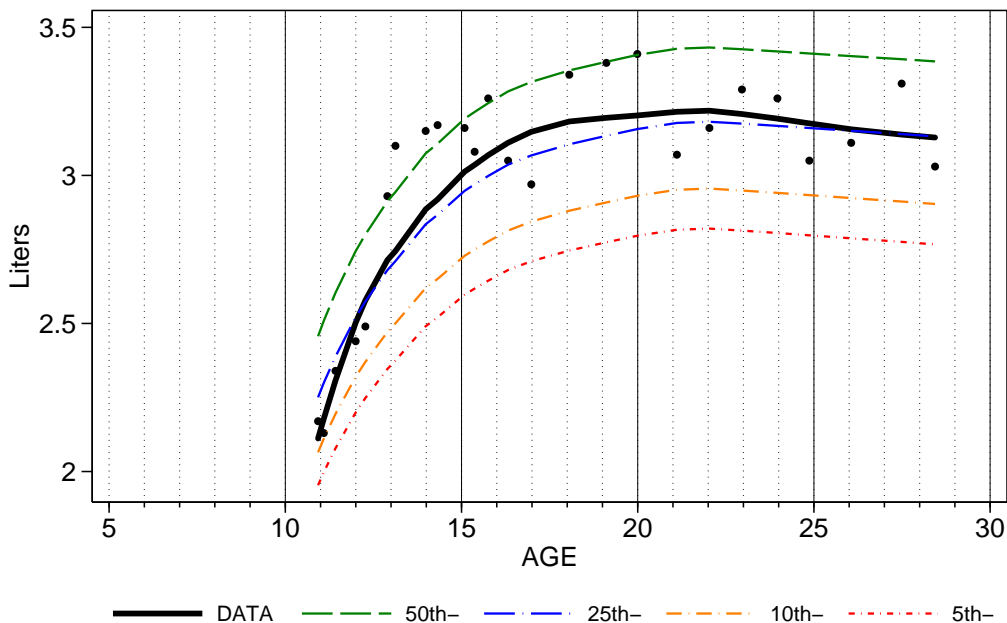

1498

**PATTERN OF GROWTH/DECLINE (Check One)**

- ( 1) Normal Growth
- ( 2) Normal Growth, Early Decline
- ( 3) Reduced Growth
- ( 4) Reduced Growth, Early Decline
- ( 9) Undetermined Pattern
- ( 8) Undetermined - not enough data

Maximum lung growth attained: ( 1) Yes ( 0) No

Plateau started: ( 2) No plateau ( 1) Yes ( 0) No

Decline started: ( 1) Yes ( 0) No

AGE AT each of the following periods (use '99' if N/A):

Maximum Lung Growth: \_\_\_\_ . \_\_\_\_

Start of Plateau: \_\_\_\_ . \_\_\_\_

Start of Decline: \_\_\_\_ . \_\_\_\_

### Pre-BD FEV1 Data and Percentiles: 1504

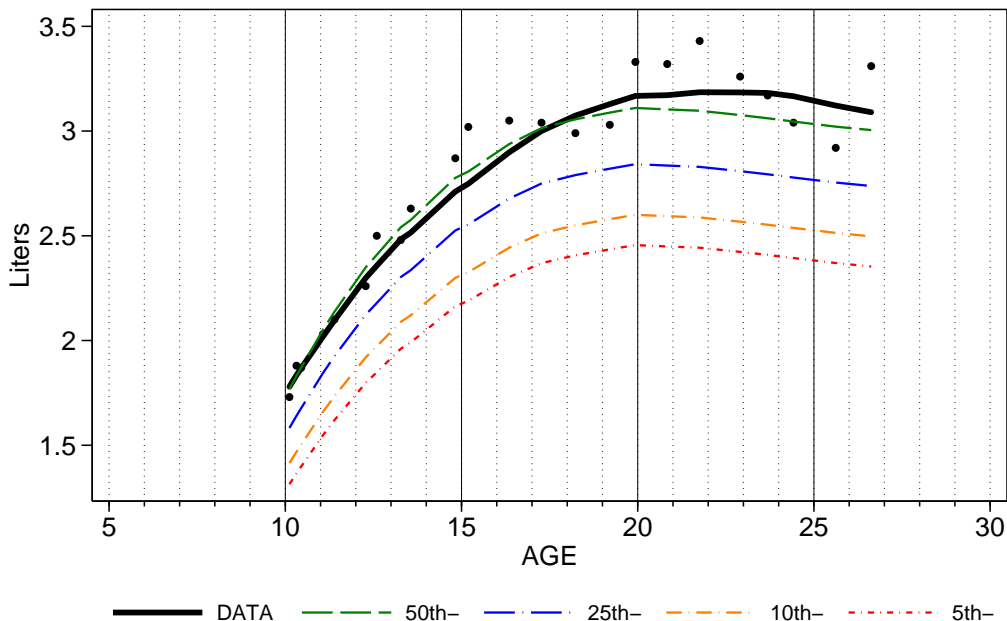

1504

**PATTERN OF GROWTH/DECLINE (Check One)**

- ( 1 ) Normal Growth
- ( 2 ) Normal Growth, Early Decline
- ( 3 ) Reduced Growth
- ( 4 ) Reduced Growth, Early Decline
- ( 9 ) Undetermined Pattern
- ( 8 ) Undetermined - not enough data

Maximum lung growth attained: ( 1 ) Yes ( 0 ) No

Plateau started: ( 2 ) No plateau ( 1 ) Yes ( 0 ) No

Decline started: ( 1 ) Yes ( 0 ) No

AGE AT each of the following periods (use '99' if N/A):

Maximum Lung Growth: \_\_\_\_ . \_\_\_\_

Start of Plateau: \_\_\_\_ . \_\_\_\_

Start of Decline: \_\_\_\_ . \_\_\_\_



### Pre-BD FEV1 Data and Percentiles: 1513

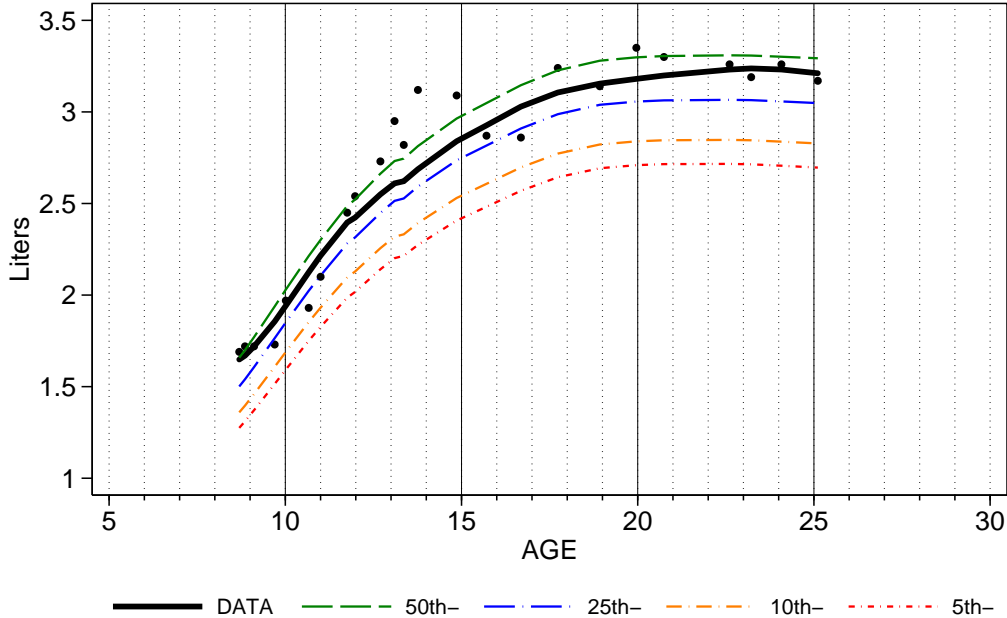

1513

**PATTERN OF GROWTH/DECLINE (Check One)**

- ( 1 ) Normal Growth
- ( 2 ) Normal Growth, Early Decline
- ( 3 ) Reduced Growth
- ( 4 ) Reduced Growth, Early Decline
- ( 9 ) Undetermined Pattern
- ( 8 ) Undetermined - not enough data

Maximum lung growth attained: ( 1 ) Yes ( 0 ) No

Plateau started: ( 2 ) No plateau ( 1 ) Yes ( 0 ) No

Decline started: ( 1 ) Yes ( 0 ) No

AGE AT each of the following periods (use '99' if N/A):

Maximum Lung Growth: \_\_\_\_ . \_\_\_\_

Start of Plateau: \_\_\_\_ . \_\_\_\_

Start of Decline: \_\_\_\_ . \_\_\_\_

### Pre-BD FEV1 Data and Percentiles: 1521

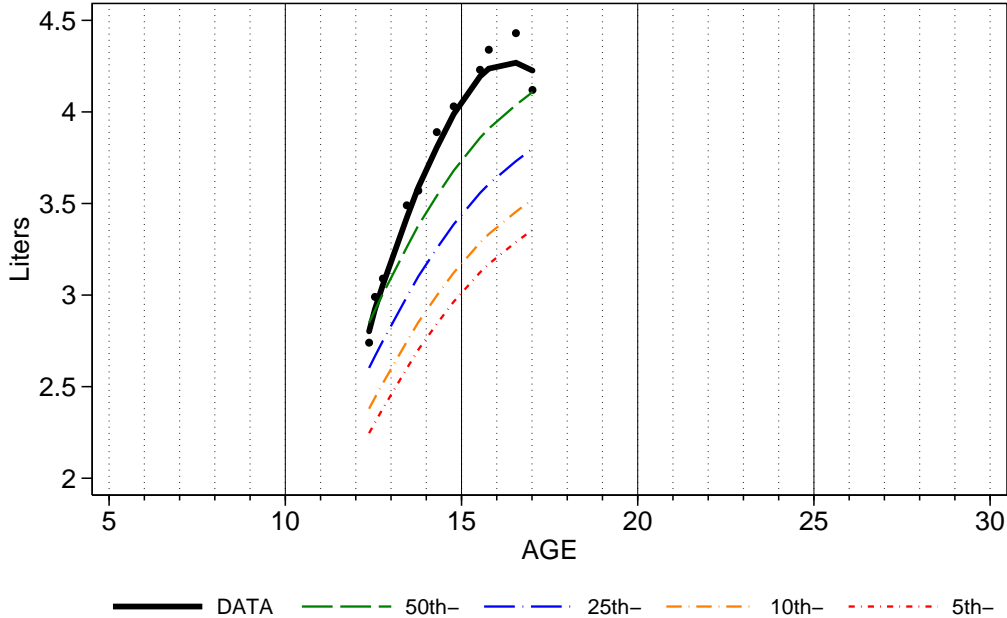

1521

**PATTERN OF GROWTH/DECLINE (Check One)**

- ( 1) Normal Growth
- ( 2) Normal Growth, Early Decline
- ( 3) Reduced Growth
- ( 4) Reduced Growth, Early Decline
- ( 9) Undetermined Pattern
- ( 8) Undetermined - not enough data

Maximum lung growth attained: ( 1) Yes ( 0) No

Plateau started: ( 2) No plateau ( 1) Yes ( 0) No

Decline started: ( 1) Yes ( 0) No

AGE AT each of the following periods (use '99' if N/A):

Maximum Lung Growth: \_\_\_\_ . \_\_\_\_

Start of Plateau: \_\_\_\_ . \_\_\_\_

Start of Decline: \_\_\_\_ . \_\_\_\_

### Pre-BD FEV1 Data and Percentiles: 1522

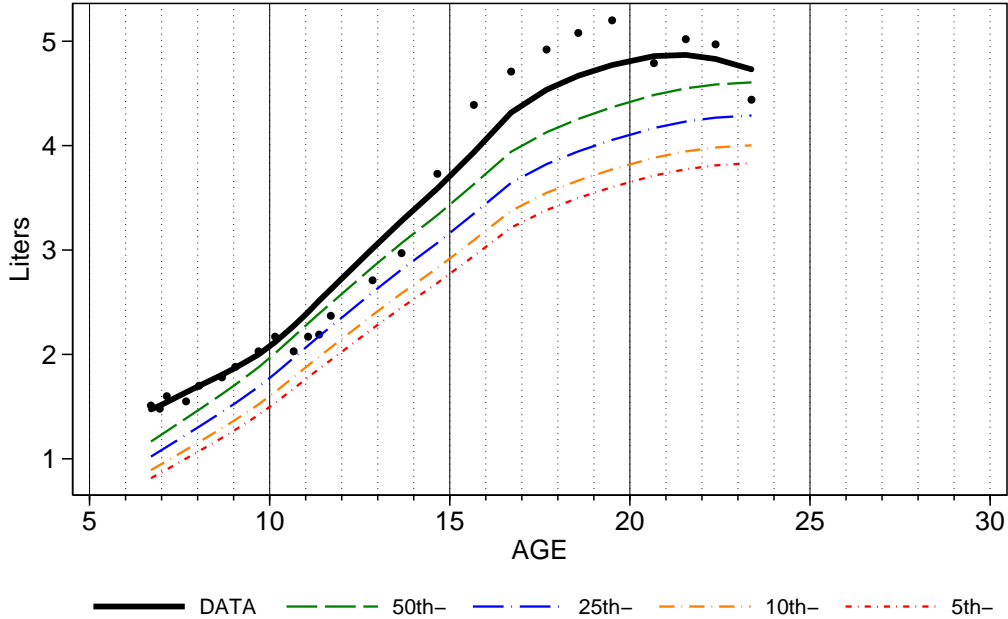

1522

**PATTERN OF GROWTH/DECLINE (Check One)**

- ( 1) Normal Growth
- ( 2) Normal Growth, Early Decline
- ( 3) Reduced Growth
- ( 4) Reduced Growth, Early Decline
- ( 9) Undetermined Pattern
- ( 8) Undetermined - not enough data

Maximum lung growth attained: ( 1) Yes ( 0) No

Plateau started: ( 2) No plateau ( 1) Yes ( 0) No

Decline started: ( 1) Yes ( 0) No

AGE AT each of the following periods (use '99' if N/A):

Maximum Lung Growth: \_\_\_\_ . \_\_\_\_

Start of Plateau: \_\_\_\_ . \_\_\_\_

Start of Decline: \_\_\_\_ . \_\_\_\_

### Pre-BD FEV1 Data and Percentiles: 1524

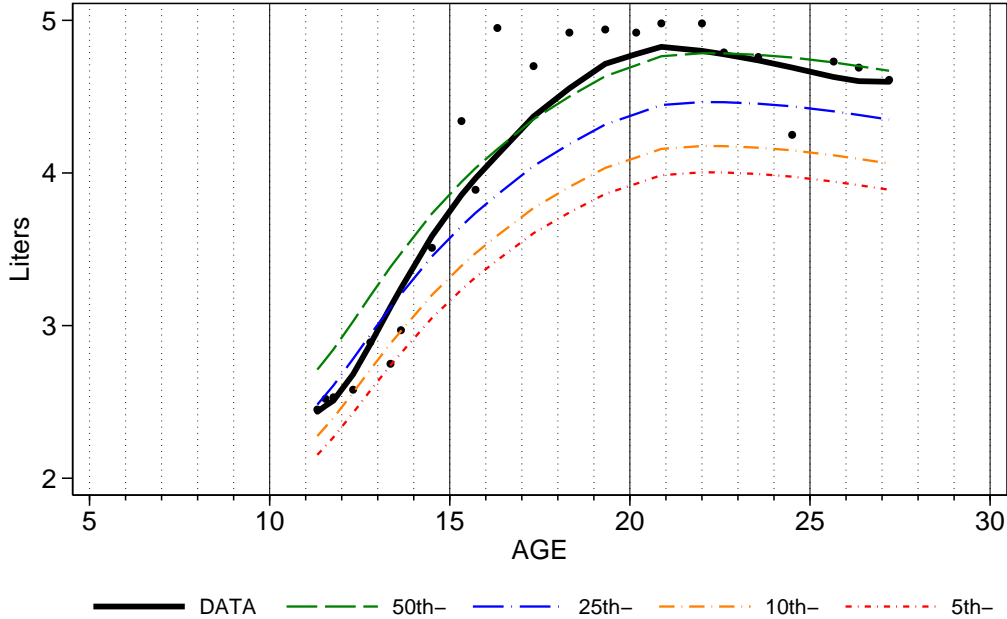

1524

**PATTERN OF GROWTH/DECLINE (Check One)**

- ( 1 ) Normal Growth
- ( 2 ) Normal Growth, Early Decline
- ( 3 ) Reduced Growth
- ( 4 ) Reduced Growth, Early Decline
- ( 9 ) Undetermined Pattern
- ( 8 ) Undetermined - not enough data

Maximum lung growth attained: ( 1 ) Yes ( 0 ) No

Plateau started: ( 2 ) No plateau ( 1 ) Yes ( 0 ) No

Decline started: ( 1 ) Yes ( 0 ) No

AGE AT each of the following periods (use '99' if N/A):

Maximum Lung Growth: \_\_\_\_ . \_\_\_\_

Start of Plateau: \_\_\_\_ . \_\_\_\_

Start of Decline: \_\_\_\_ . \_\_\_\_

### Pre-BD FEV1 Data and Percentiles: 1533

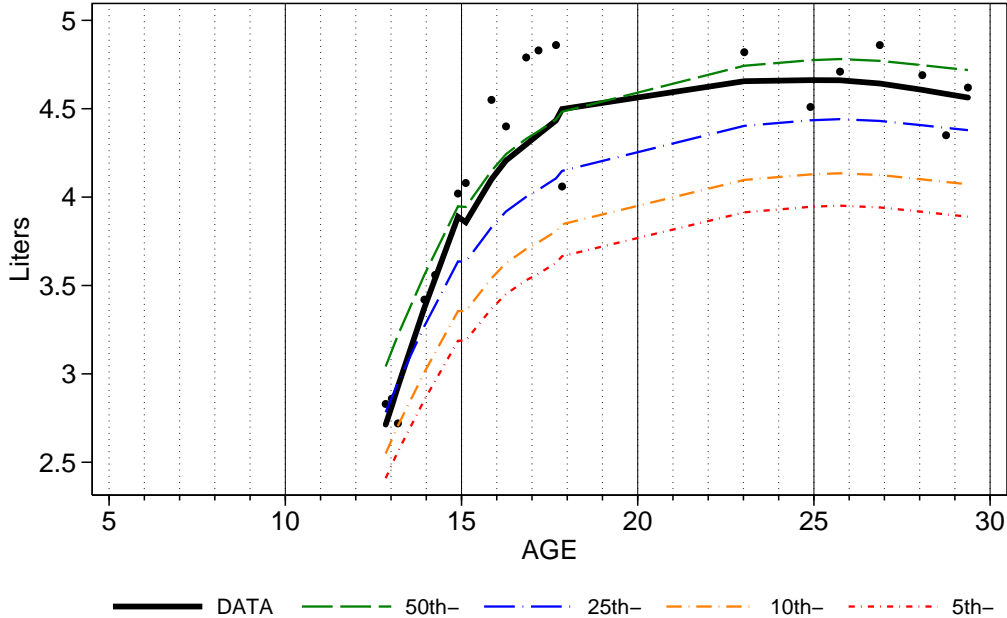

1533

**PATTERN OF GROWTH/DECLINE (Check One)**

- ( 1) Normal Growth
- ( 2) Normal Growth, Early Decline
- ( 3) Reduced Growth
- ( 4) Reduced Growth, Early Decline
- ( 9) Undetermined Pattern
- ( 8) Undetermined - not enough data

Maximum lung growth attained: ( 1) Yes ( 0) No

Plateau started: ( 2) No plateau ( 1) Yes ( 0) No

Decline started: ( 1) Yes ( 0) No

AGE AT each of the following periods (use '99' if N/A):

Maximum Lung Growth: \_\_\_\_ . \_\_\_\_

Start of Plateau: \_\_\_\_ . \_\_\_\_

Start of Decline: \_\_\_\_ . \_\_\_\_

### Pre-BD FEV1 Data and Percentiles: 1539

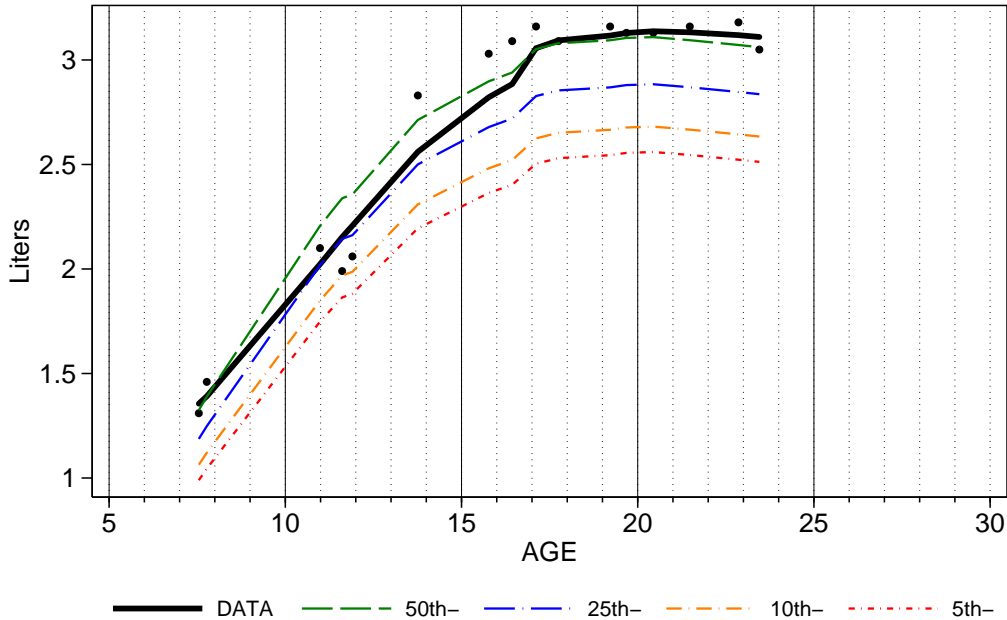

1539

**PATTERN OF GROWTH/DECLINE (Check One)**

- ( 1 ) Normal Growth
- ( 2 ) Normal Growth, Early Decline
- ( 3 ) Reduced Growth
- ( 4 ) Reduced Growth, Early Decline
- ( 9 ) Undetermined Pattern
- ( 8 ) Undetermined - not enough data

Maximum lung growth attained: ( 1 ) Yes ( 0 ) No

Plateau started: ( 2 ) No plateau ( 1 ) Yes ( 0 ) No

Decline started: ( 1 ) Yes ( 0 ) No

AGE AT each of the following periods (use '99' if N/A):

Maximum Lung Growth: \_\_\_\_ . \_\_\_\_

Start of Plateau: \_\_\_\_ . \_\_\_\_

Start of Decline: \_\_\_\_ . \_\_\_\_

### Pre-BD FEV1 Data and Percentiles: 1540

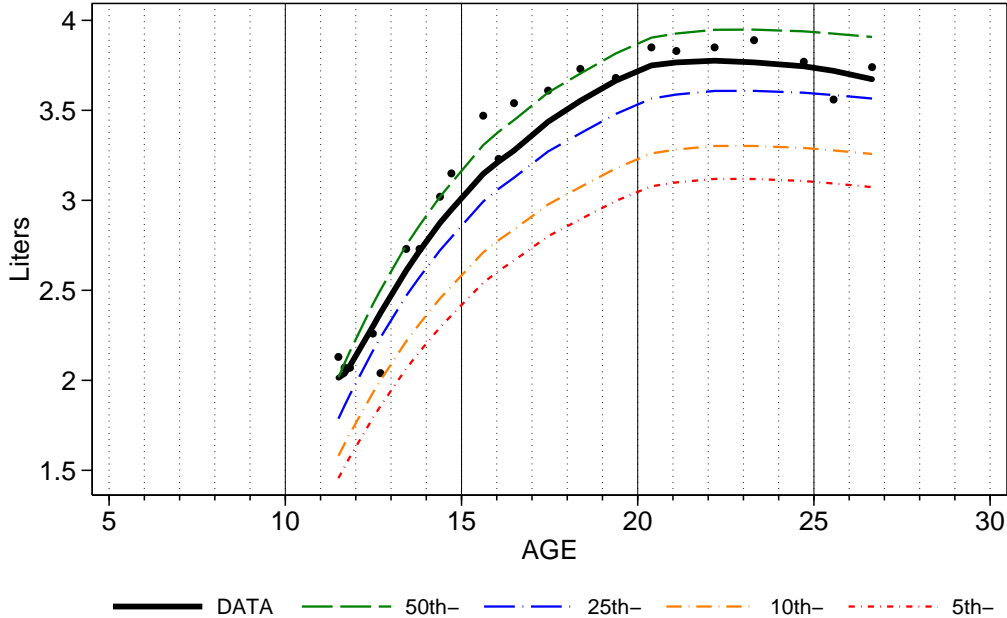

1540

**PATTERN OF GROWTH/DECLINE (Check One)**

- ( 1 ) Normal Growth
- ( 2 ) Normal Growth, Early Decline
- ( 3 ) Reduced Growth
- ( 4 ) Reduced Growth, Early Decline
- ( 9 ) Undetermined Pattern
- ( 8 ) Undetermined - not enough data

Maximum lung growth attained: ( 1 ) Yes ( 0 ) No

Plateau started: ( 2 ) No plateau ( 1 ) Yes ( 0 ) No

Decline started: ( 1 ) Yes ( 0 ) No

AGE AT each of the following periods (use '99' if N/A):

Maximum Lung Growth: \_\_\_\_ . \_\_\_\_

Start of Plateau: \_\_\_\_ . \_\_\_\_

Start of Decline: \_\_\_\_ . \_\_\_\_

### Pre-BD FEV1 Data and Percentiles: 1548

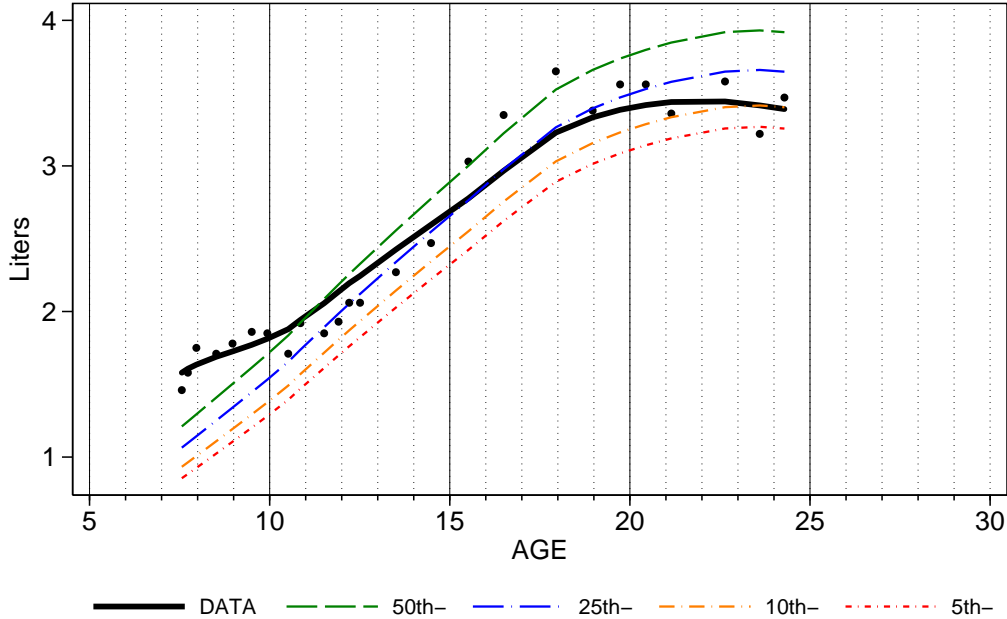

1548

**PATTERN OF GROWTH/DECLINE (Check One)**

- ( 1) Normal Growth
- ( 2) Normal Growth, Early Decline
- ( 3) Reduced Growth
- ( 4) Reduced Growth, Early Decline
- ( 9) Undetermined Pattern
- ( 8) Undetermined - not enough data

Maximum lung growth attained: ( 1) Yes ( 0) No

Plateau started: ( 2) No plateau ( 1) Yes ( 0) No

Decline started: ( 1) Yes ( 0) No

AGE AT each of the following periods (use '99' if N/A):

Maximum Lung Growth: \_\_\_\_ . \_\_\_\_

Start of Plateau: \_\_\_\_ . \_\_\_\_

Start of Decline: \_\_\_\_ . \_\_\_\_



### Pre-BD FEV1 Data and Percentiles: 1550

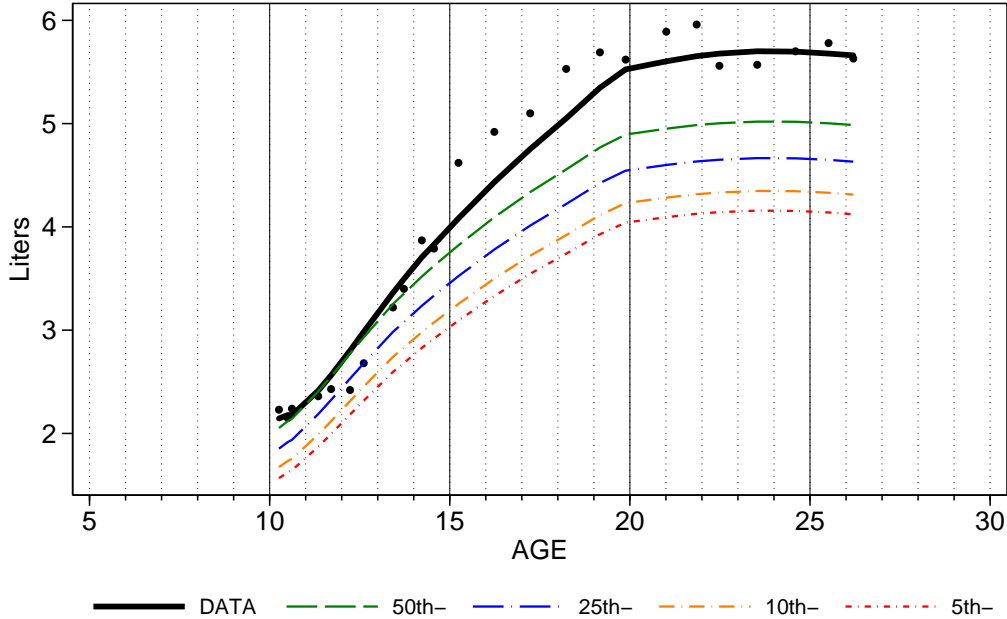

1550

**PATTERN OF GROWTH/DECLINE (Check One)**

- ( 1 ) Normal Growth
- ( 2 ) Normal Growth, Early Decline
- ( 3 ) Reduced Growth
- ( 4 ) Reduced Growth, Early Decline
- ( 9 ) Undetermined Pattern
- ( 8 ) Undetermined - not enough data

Maximum lung growth attained: ( 1 ) Yes ( 0 ) No

Plateau started: ( 2 ) No plateau ( 1 ) Yes ( 0 ) No

Decline started: ( 1 ) Yes ( 0 ) No

AGE AT each of the following periods (use '99' if N/A):

Maximum Lung Growth: \_\_\_\_ . \_\_\_\_

Start of Plateau: \_\_\_\_ . \_\_\_\_

Start of Decline: \_\_\_\_ . \_\_\_\_

### Pre-BD FEV1 Data and Percentiles: 1551

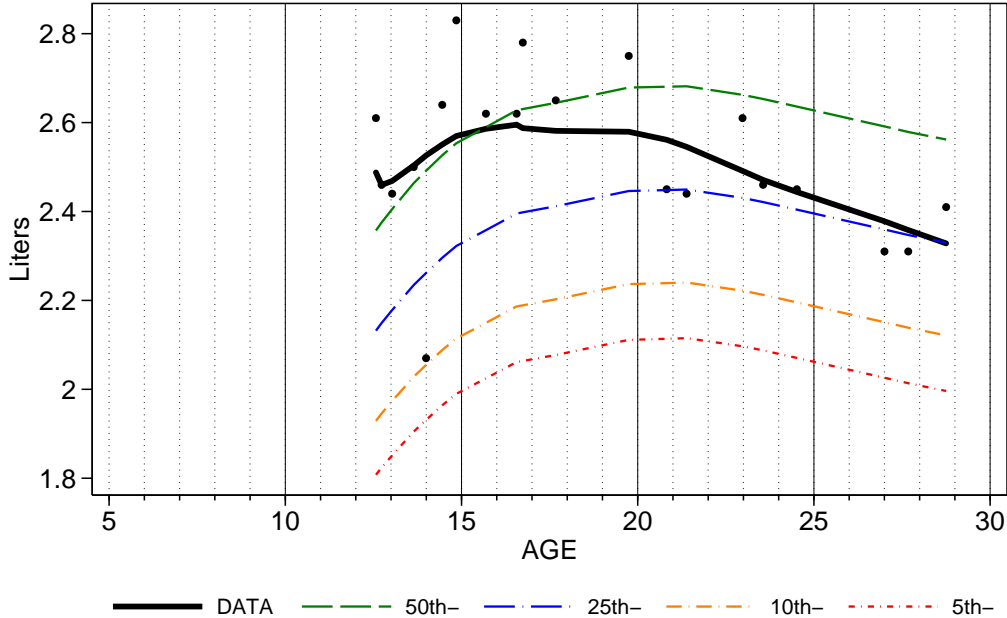

1551

**PATTERN OF GROWTH/DECLINE (Check One)**

- ( 1) Normal Growth
- ( 2) Normal Growth, Early Decline
- ( 3) Reduced Growth
- ( 4) Reduced Growth, Early Decline
- ( 9) Undetermined Pattern
- ( 8) Undetermined - not enough data

Maximum lung growth attained: ( 1) Yes ( 0) No

Plateau started: ( 2) No plateau ( 1) Yes ( 0) No

Decline started: ( 1) Yes ( 0) No

AGE AT each of the following periods (use '99' if N/A):

Maximum Lung Growth: \_\_\_\_ . \_\_\_\_

Start of Plateau: \_\_\_\_ . \_\_\_\_

Start of Decline: \_\_\_\_ . \_\_\_\_

### Pre-BD FEV1 Data and Percentiles: 1559

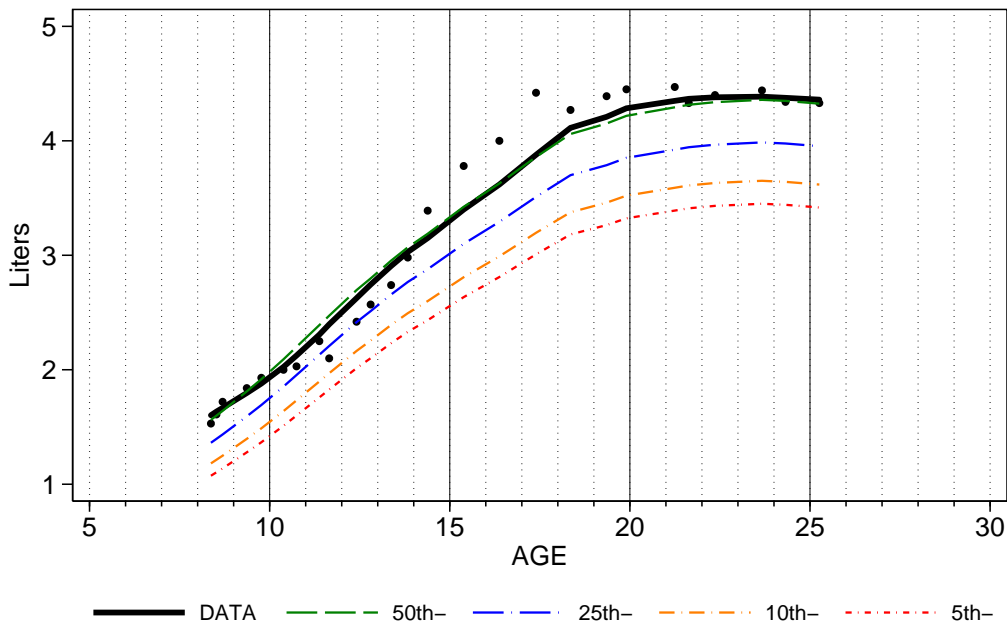

1559

**PATTERN OF GROWTH/DECLINE (Check One)**

- ( 1 ) Normal Growth
- ( 2 ) Normal Growth, Early Decline
- ( 3 ) Reduced Growth
- ( 4 ) Reduced Growth, Early Decline
- ( 9 ) Undetermined Pattern
- ( 8 ) Undetermined - not enough data

Maximum lung growth attained: ( 1 ) Yes ( 0 ) No

Plateau started: ( 2 ) No plateau ( 1 ) Yes ( 0 ) No

Decline started: ( 1 ) Yes ( 0 ) No

AGE AT each of the following periods (use '99' if N/A):

Maximum Lung Growth: \_\_\_\_ . \_\_\_\_

Start of Plateau: \_\_\_\_ . \_\_\_\_

Start of Decline: \_\_\_\_ . \_\_\_\_

### Pre-BD FEV1 Data and Percentiles: 1565

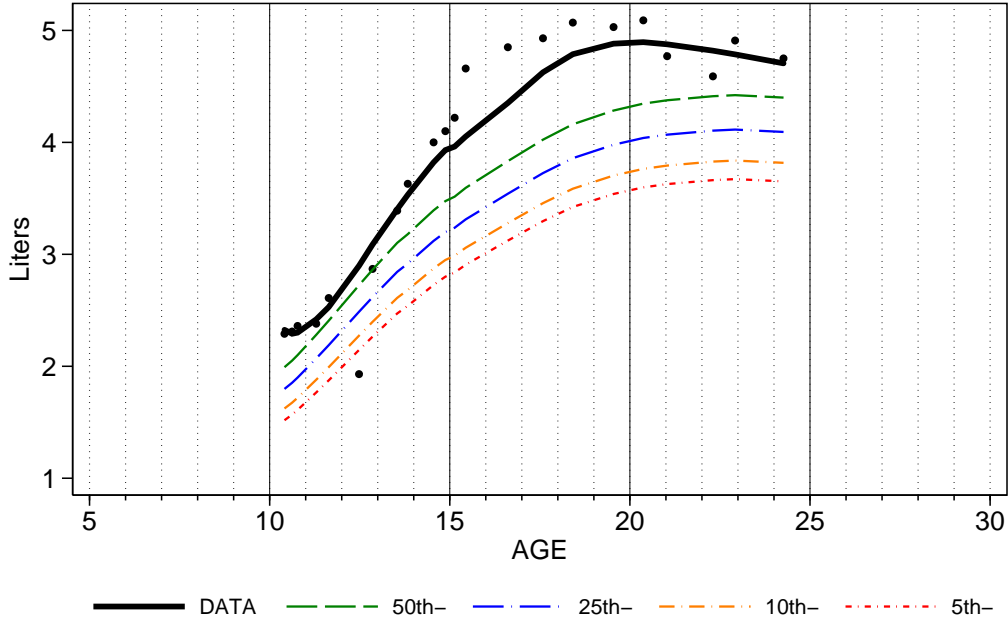

1565

**PATTERN OF GROWTH/DECLINE (Check One)**

- ( 1) Normal Growth
- ( 2) Normal Growth, Early Decline
- ( 3) Reduced Growth
- ( 4) Reduced Growth, Early Decline
- ( 9) Undetermined Pattern
- ( 8) Undetermined - not enough data

Maximum lung growth attained: ( 1) Yes ( 0) No

Plateau started: ( 2) No plateau ( 1) Yes ( 0) No

Decline started: ( 1) Yes ( 0) No

AGE AT each of the following periods (use '99' if N/A):

Maximum Lung Growth: \_\_\_\_ . \_\_\_\_

Start of Plateau: \_\_\_\_ . \_\_\_\_

Start of Decline: \_\_\_\_ . \_\_\_\_

### Pre-BD FEV1 Data and Percentiles: 1577

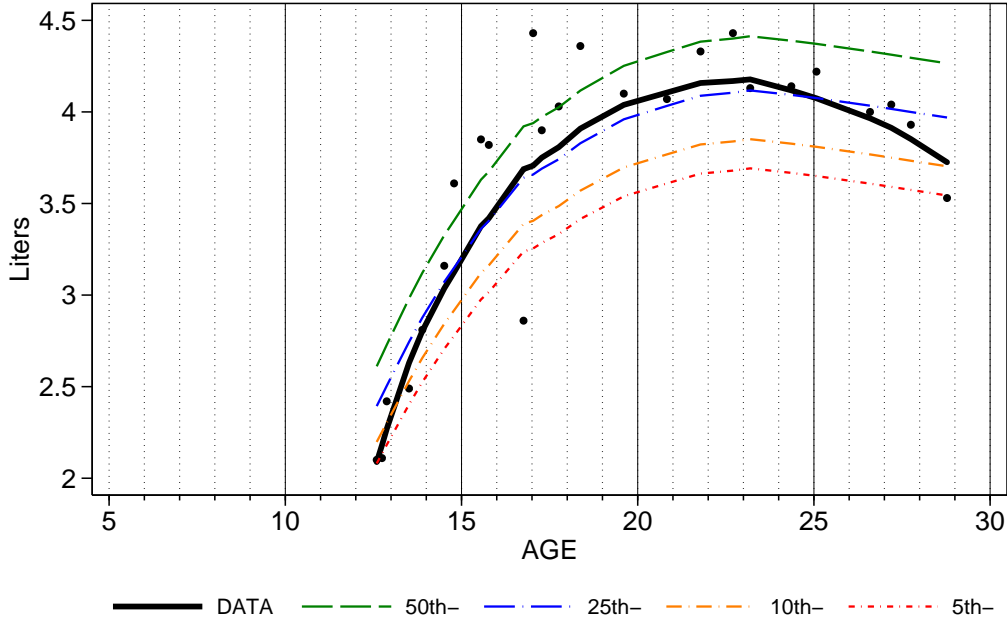

1577

**PATTERN OF GROWTH/DECLINE (Check One)**

- ( 1 ) Normal Growth
- ( 2 ) Normal Growth, Early Decline
- ( 3 ) Reduced Growth
- ( 4 ) Reduced Growth, Early Decline
- ( 9 ) Undetermined Pattern
- ( 8 ) Undetermined - not enough data

Maximum lung growth attained: ( 1 ) Yes ( 0 ) No

Plateau started: ( 2 ) No plateau ( 1 ) Yes ( 0 ) No

Decline started: ( 1 ) Yes ( 0 ) No

AGE AT each of the following periods (use '99' if N/A):

Maximum Lung Growth: \_\_\_\_ . \_\_\_\_

Start of Plateau: \_\_\_\_ . \_\_\_\_

Start of Decline: \_\_\_\_ . \_\_\_\_

### Pre-BD FEV1 Data and Percentiles: 1579

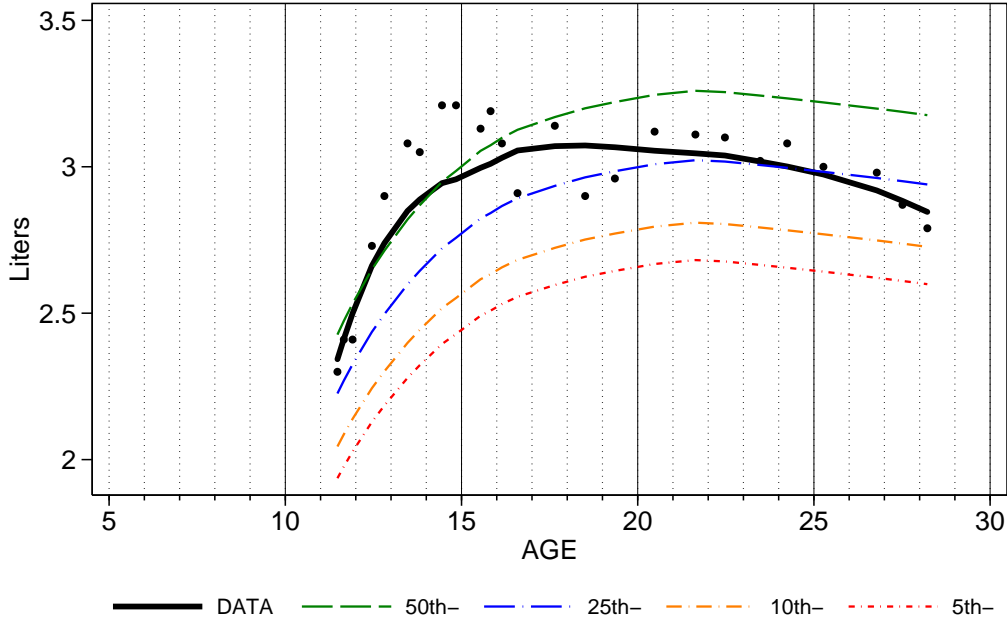

1579

**PATTERN OF GROWTH/DECLINE (Check One)**

- ( 1) Normal Growth
- ( 2) Normal Growth, Early Decline
- ( 3) Reduced Growth
- ( 4) Reduced Growth, Early Decline
- ( 9) Undetermined Pattern
- ( 8) Undetermined - not enough data

Maximum lung growth attained: ( 1) Yes ( 0) No

Plateau started: ( 2) No plateau ( 1) Yes ( 0) No

Decline started: ( 1) Yes ( 0) No

AGE AT each of the following periods (use '99' if N/A):

Maximum Lung Growth: \_\_\_\_ . \_\_\_\_

Start of Plateau: \_\_\_\_ . \_\_\_\_

Start of Decline: \_\_\_\_ . \_\_\_\_

### Pre-BD FEV1 Data and Percentiles: 1581

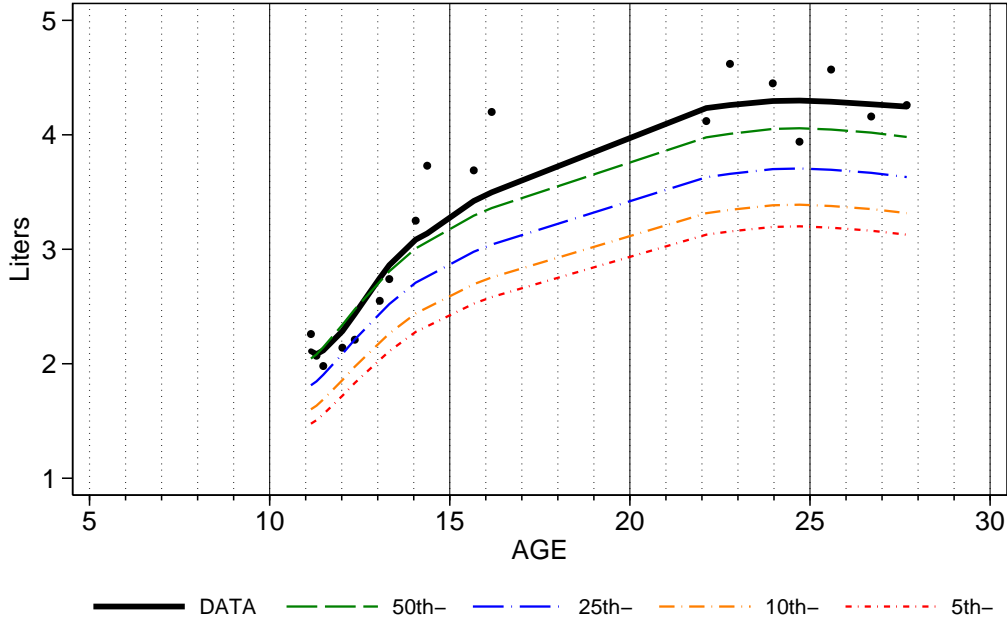

1581

**PATTERN OF GROWTH/DECLINE (Check One)**

- ( 1 ) Normal Growth
- ( 2 ) Normal Growth, Early Decline
- ( 3 ) Reduced Growth
- ( 4 ) Reduced Growth, Early Decline
- ( 9 ) Undetermined Pattern
- ( 8 ) Undetermined - not enough data

Maximum lung growth attained: ( 1 ) Yes ( 0 ) No

Plateau started: ( 2 ) No plateau ( 1 ) Yes ( 0 ) No

Decline started: ( 1 ) Yes ( 0 ) No

AGE AT each of the following periods (use '99' if N/A):

Maximum Lung Growth: \_\_\_\_ . \_\_\_\_

Start of Plateau: \_\_\_\_ . \_\_\_\_

Start of Decline: \_\_\_\_ . \_\_\_\_

### Pre-BD FEV1 Data and Percentiles: 1582

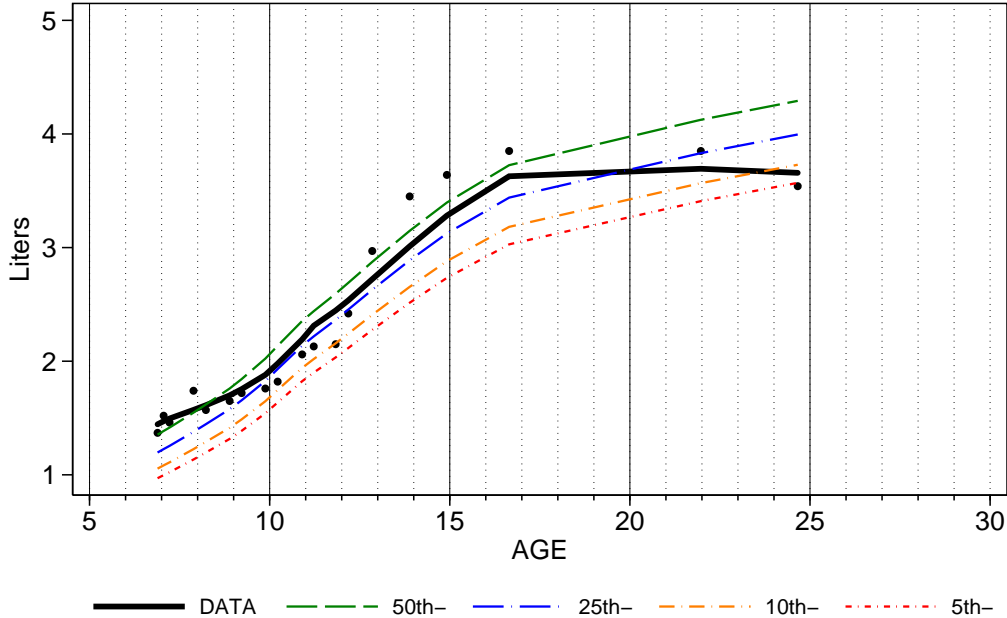

1582

**PATTERN OF GROWTH/DECLINE (Check One)**

- ( 1) Normal Growth
- ( 2) Normal Growth, Early Decline
- ( 3) Reduced Growth
- ( 4) Reduced Growth, Early Decline
- ( 9) Undetermined Pattern
- ( 8) Undetermined - not enough data

Maximum lung growth attained: ( 1) Yes ( 0) No

Plateau started: ( 2) No plateau ( 1) Yes ( 0) No

Decline started: ( 1) Yes ( 0) No

AGE AT each of the following periods (use '99' if N/A):

Maximum Lung Growth: \_\_\_\_ . \_\_\_\_

Start of Plateau: \_\_\_\_ . \_\_\_\_

Start of Decline: \_\_\_\_ . \_\_\_\_



### Pre-BD FEV1 Data and Percentiles: 1588

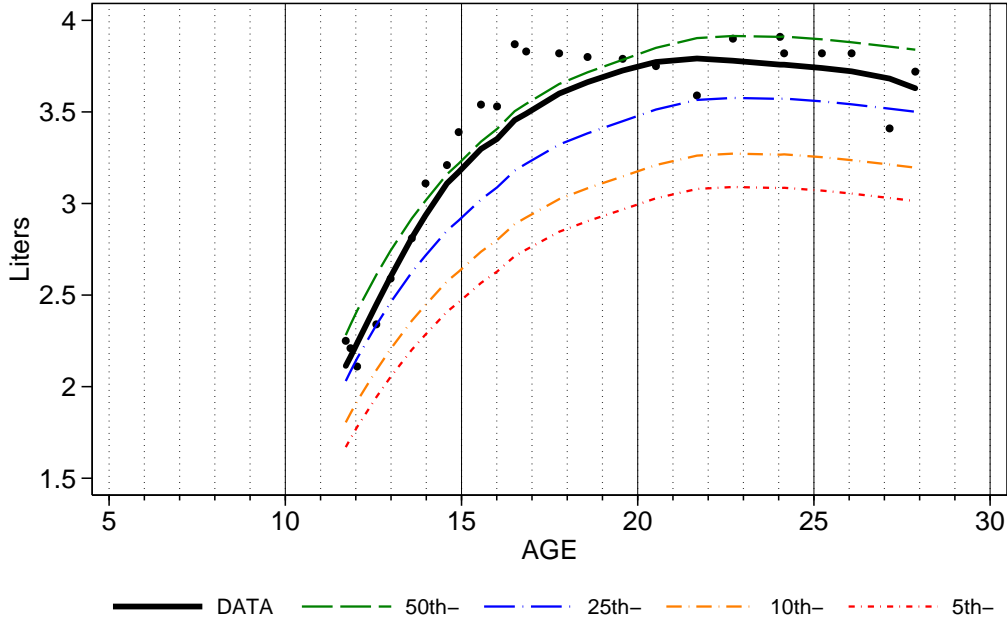

1588

**PATTERN OF GROWTH/DECLINE (Check One)**

- ( 1) Normal Growth
- ( 2) Normal Growth, Early Decline
- ( 3) Reduced Growth
- ( 4) Reduced Growth, Early Decline
- ( 9) Undetermined Pattern
- ( 8) Undetermined - not enough data

Maximum lung growth attained: ( 1) Yes ( 0) No

Plateau started: ( 2) No plateau ( 1) Yes ( 0) No

Decline started: ( 1) Yes ( 0) No

AGE AT each of the following periods (use '99' if N/A):

Maximum Lung Growth: \_\_\_\_ . \_\_\_\_

Start of Plateau: \_\_\_\_ . \_\_\_\_

Start of Decline: \_\_\_\_ . \_\_\_\_

### Pre-BD FEV1 Data and Percentiles: 1590

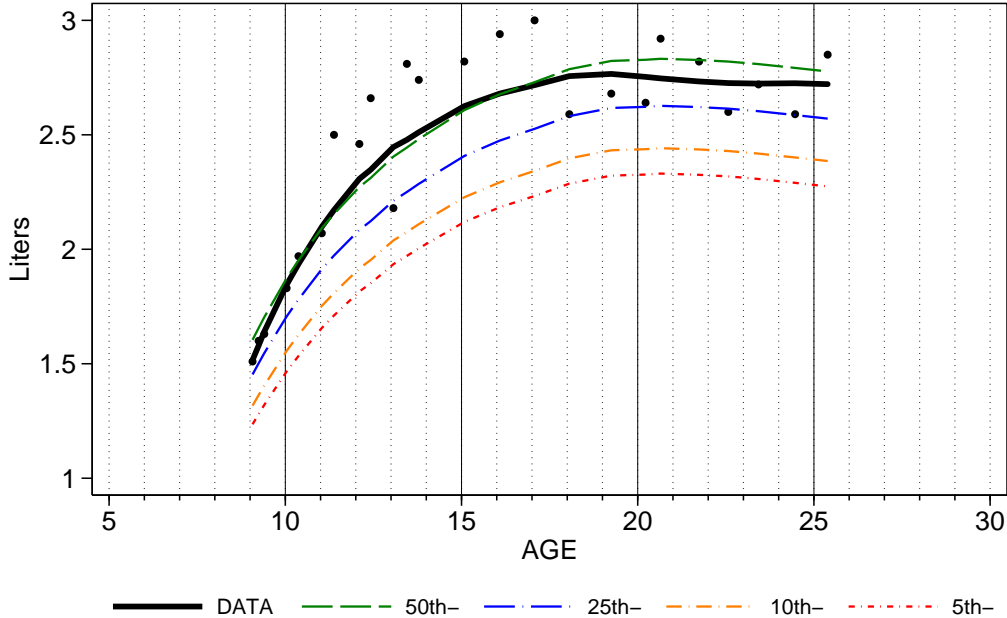

1590

**PATTERN OF GROWTH/DECLINE (Check One)**

- ( 1) Normal Growth
- ( 2) Normal Growth, Early Decline
- ( 3) Reduced Growth
- ( 4) Reduced Growth, Early Decline
- ( 9) Undetermined Pattern
- ( 8) Undetermined - not enough data

Maximum lung growth attained: ( 1) Yes ( 0) No

Plateau started: ( 2) No plateau ( 1) Yes ( 0) No

Decline started: ( 1) Yes ( 0) No

AGE AT each of the following periods (use '99' if N/A):

Maximum Lung Growth: \_\_\_\_ . \_\_\_\_

Start of Plateau: \_\_\_\_ . \_\_\_\_

Start of Decline: \_\_\_\_ . \_\_\_\_

### Pre-BD FEV1 Data and Percentiles: 1591

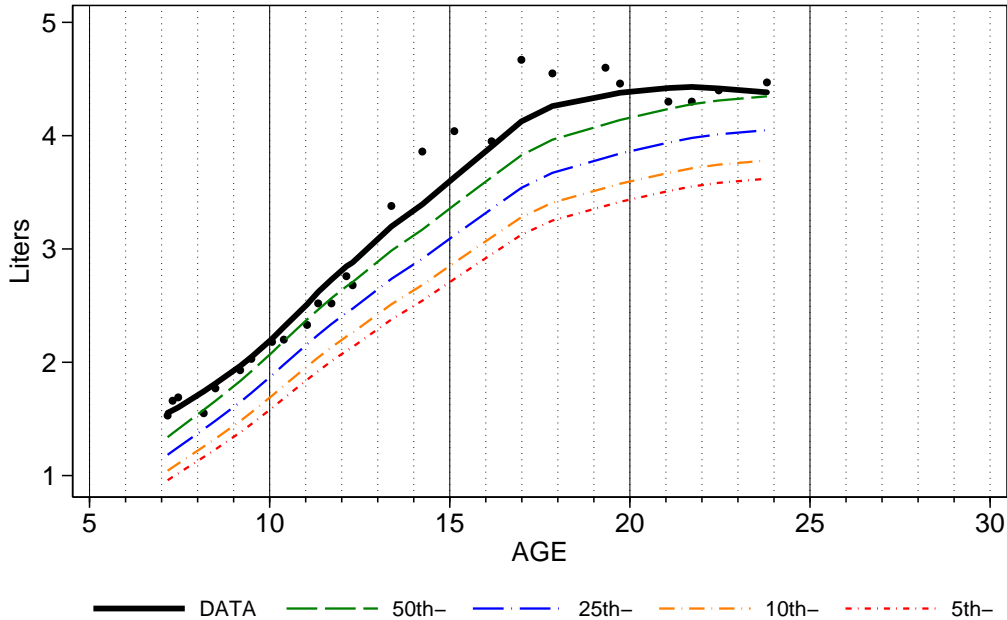

1591

**PATTERN OF GROWTH/DECLINE (Check One)**

- ( 1 ) Normal Growth
- ( 2 ) Normal Growth, Early Decline
- ( 3 ) Reduced Growth
- ( 4 ) Reduced Growth, Early Decline
- ( 9 ) Undetermined Pattern
- ( 8 ) Undetermined - not enough data

Maximum lung growth attained: ( 1 ) Yes ( 0 ) No

Plateau started: ( 2 ) No plateau ( 1 ) Yes ( 0 ) No

Decline started: ( 1 ) Yes ( 0 ) No

AGE AT each of the following periods (use '99' if N/A):

Maximum Lung Growth: \_\_\_\_ . \_\_\_\_

Start of Plateau: \_\_\_\_ . \_\_\_\_

Start of Decline: \_\_\_\_ . \_\_\_\_

### Pre-BD FEV1 Data and Percentiles: 1594

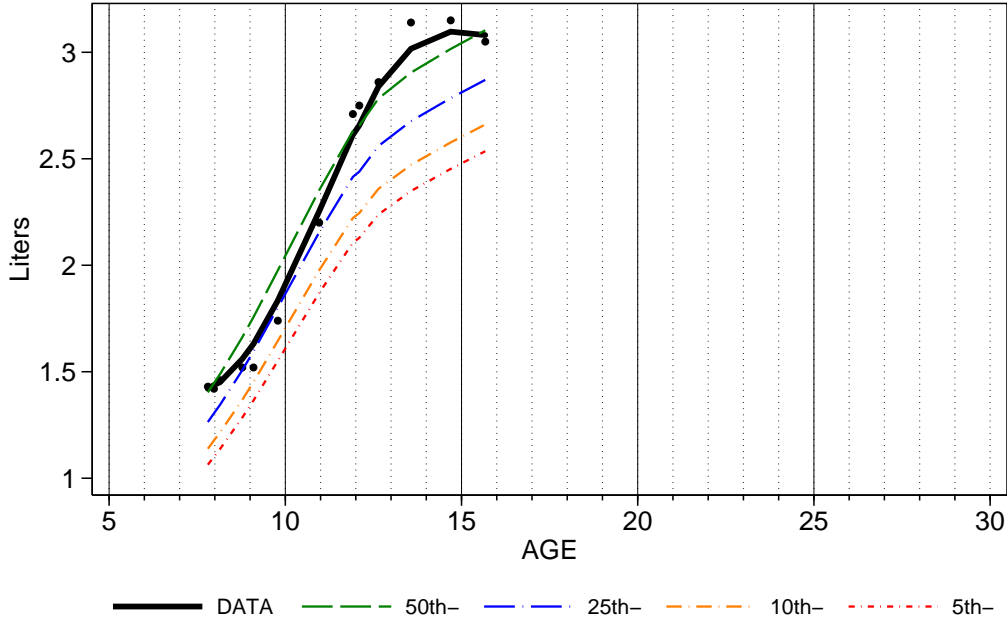

1594

**PATTERN OF GROWTH/DECLINE (Check One)**

- ( 1 ) Normal Growth
- ( 2 ) Normal Growth, Early Decline
- ( 3 ) Reduced Growth
- ( 4 ) Reduced Growth, Early Decline
- ( 9 ) Undetermined Pattern
- ( 8 ) Undetermined - not enough data

Maximum lung growth attained: ( 1 ) Yes ( 0 ) No

Plateau started: ( 2 ) No plateau ( 1 ) Yes ( 0 ) No

Decline started: ( 1 ) Yes ( 0 ) No

AGE AT each of the following periods (use '99' if N/A):

Maximum Lung Growth: \_\_\_\_ . \_\_\_\_

Start of Plateau: \_\_\_\_ . \_\_\_\_

Start of Decline: \_\_\_\_ . \_\_\_\_

### Pre-BD FEV1 Data and Percentiles: 1602

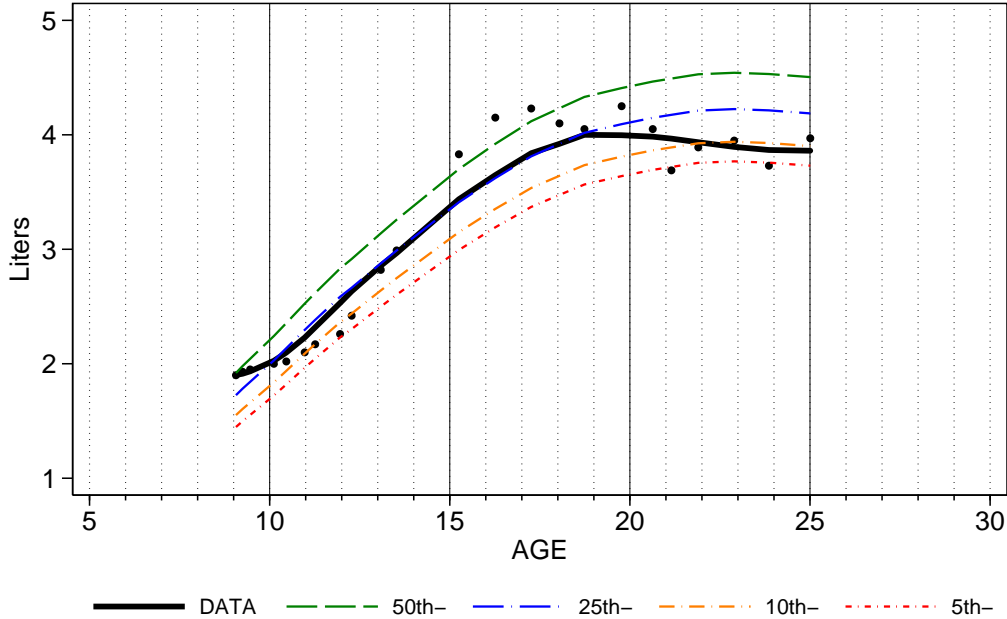

1602

**PATTERN OF GROWTH/DECLINE (Check One)**

- ( 1 ) Normal Growth
- ( 2 ) Normal Growth, Early Decline
- ( 3 ) Reduced Growth
- ( 4 ) Reduced Growth, Early Decline
- ( 9 ) Undetermined Pattern
- ( 8 ) Undetermined - not enough data

Maximum lung growth attained: ( 1 ) Yes ( 0 ) No

Plateau started: ( 2 ) No plateau ( 1 ) Yes ( 0 ) No

Decline started: ( 1 ) Yes ( 0 ) No

AGE AT each of the following periods (use '99' if N/A):

Maximum Lung Growth: \_\_\_\_ . \_\_\_\_

Start of Plateau: \_\_\_\_ . \_\_\_\_

Start of Decline: \_\_\_\_ . \_\_\_\_

### Pre-BD FEV1 Data and Percentiles: 1608

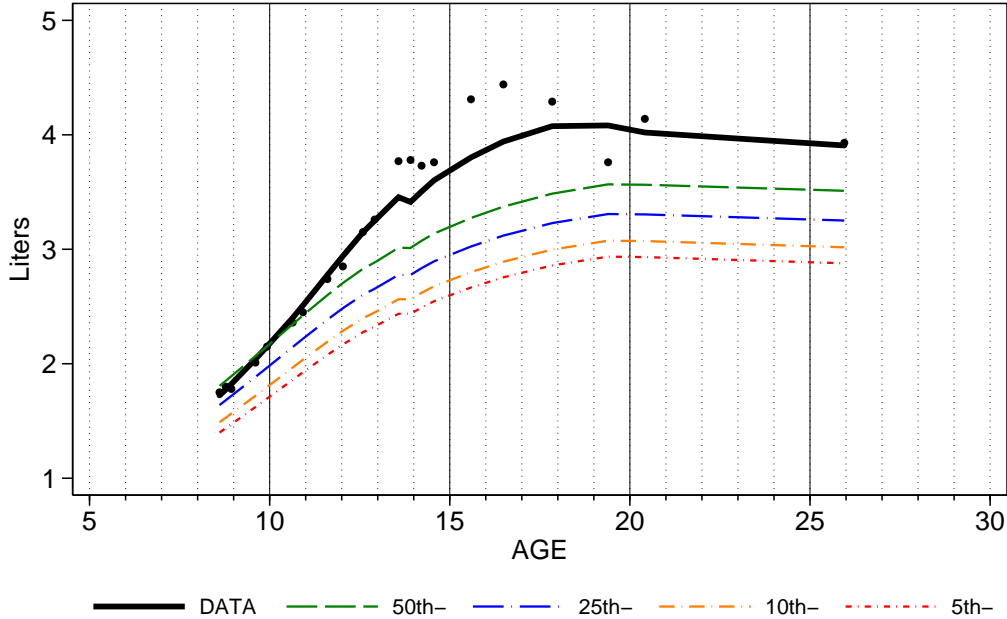

1608

**PATTERN OF GROWTH/DECLINE (Check One)**

- ( 1 ) Normal Growth
- ( 2 ) Normal Growth, Early Decline
- ( 3 ) Reduced Growth
- ( 4 ) Reduced Growth, Early Decline
- ( 9 ) Undetermined Pattern
- ( 8 ) Undetermined - not enough data

Maximum lung growth attained: ( 1 ) Yes ( 0 ) No

Plateau started: ( 2 ) No plateau ( 1 ) Yes ( 0 ) No

Decline started: ( 1 ) Yes ( 0 ) No

AGE AT each of the following periods (use '99' if N/A):

Maximum Lung Growth: \_\_\_\_ . \_\_\_\_

Start of Plateau: \_\_\_\_ . \_\_\_\_

Start of Decline: \_\_\_\_ . \_\_\_\_

### Pre-BD FEV1 Data and Percentiles: 1610

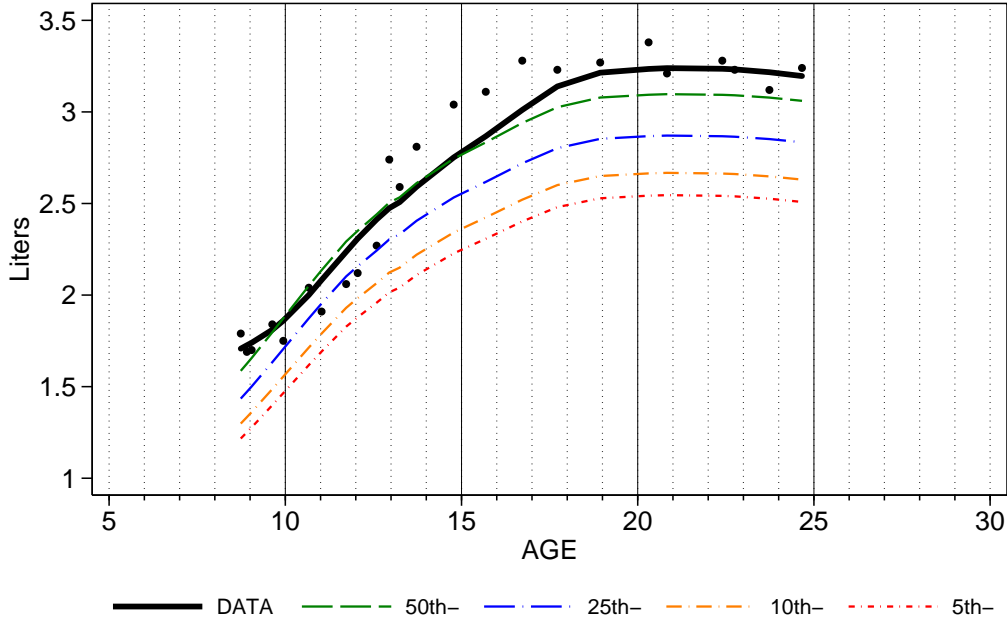

1610

**PATTERN OF GROWTH/DECLINE (Check One)**

- ( 1 ) Normal Growth
- ( 2 ) Normal Growth, Early Decline
- ( 3 ) Reduced Growth
- ( 4 ) Reduced Growth, Early Decline
- ( 9 ) Undetermined Pattern
- ( 8 ) Undetermined - not enough data

Maximum lung growth attained: ( 1 ) Yes ( 0 ) No

Plateau started: ( 2 ) No plateau ( 1 ) Yes ( 0 ) No

Decline started: ( 1 ) Yes ( 0 ) No

AGE AT each of the following periods (use '99' if N/A):

Maximum Lung Growth: \_\_\_\_ . \_\_\_\_

Start of Plateau: \_\_\_\_ . \_\_\_\_

Start of Decline: \_\_\_\_ . \_\_\_\_

### Pre-BD FEV1 Data and Percentiles: 1611

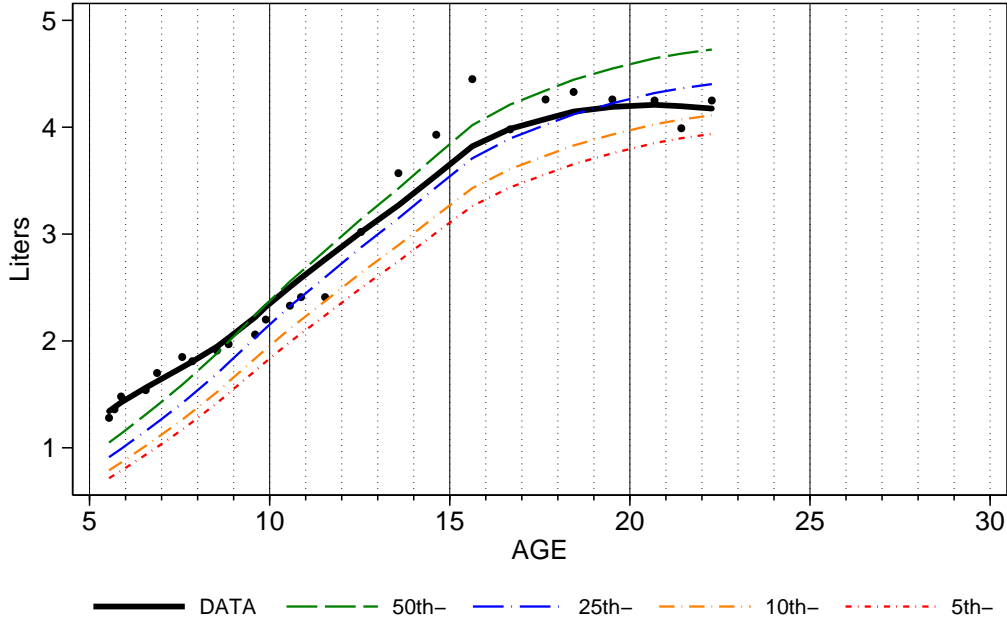

1611

**PATTERN OF GROWTH/DECLINE (Check One)**

- ( 1 ) Normal Growth
- ( 2 ) Normal Growth, Early Decline
- ( 3 ) Reduced Growth
- ( 4 ) Reduced Growth, Early Decline
- ( 9 ) Undetermined Pattern
- ( 8 ) Undetermined - not enough data

Maximum lung growth attained: ( 1 ) Yes ( 0 ) No

Plateau started: ( 2 ) No plateau ( 1 ) Yes ( 0 ) No

Decline started: ( 1 ) Yes ( 0 ) No

AGE AT each of the following periods (use '99' if N/A):

Maximum Lung Growth: \_\_\_\_ . \_\_\_\_

Start of Plateau: \_\_\_\_ . \_\_\_\_

Start of Decline: \_\_\_\_ . \_\_\_\_



### Pre-BD FEV1 Data and Percentiles: 1615

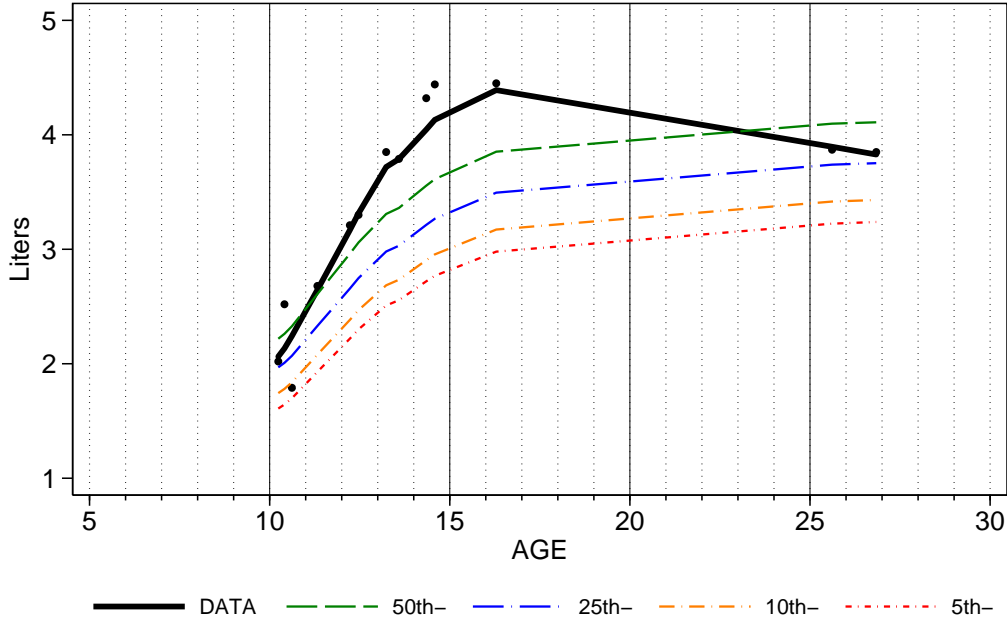

1615

**PATTERN OF GROWTH/DECLINE (Check One)**

- ( 1 ) Normal Growth
- ( 2 ) Normal Growth, Early Decline
- ( 3 ) Reduced Growth
- ( 4 ) Reduced Growth, Early Decline
- ( 9 ) Undetermined Pattern
- ( 8 ) Undetermined - not enough data

Maximum lung growth attained: ( 1 ) Yes ( 0 ) No

Plateau started: ( 2 ) No plateau ( 1 ) Yes ( 0 ) No

Decline started: ( 1 ) Yes ( 0 ) No

AGE AT each of the following periods (use '99' if N/A):

Maximum Lung Growth: \_\_\_\_ . \_\_\_\_

Start of Plateau: \_\_\_\_ . \_\_\_\_

Start of Decline: \_\_\_\_ . \_\_\_\_

### Pre-BD FEV1 Data and Percentiles: 1618

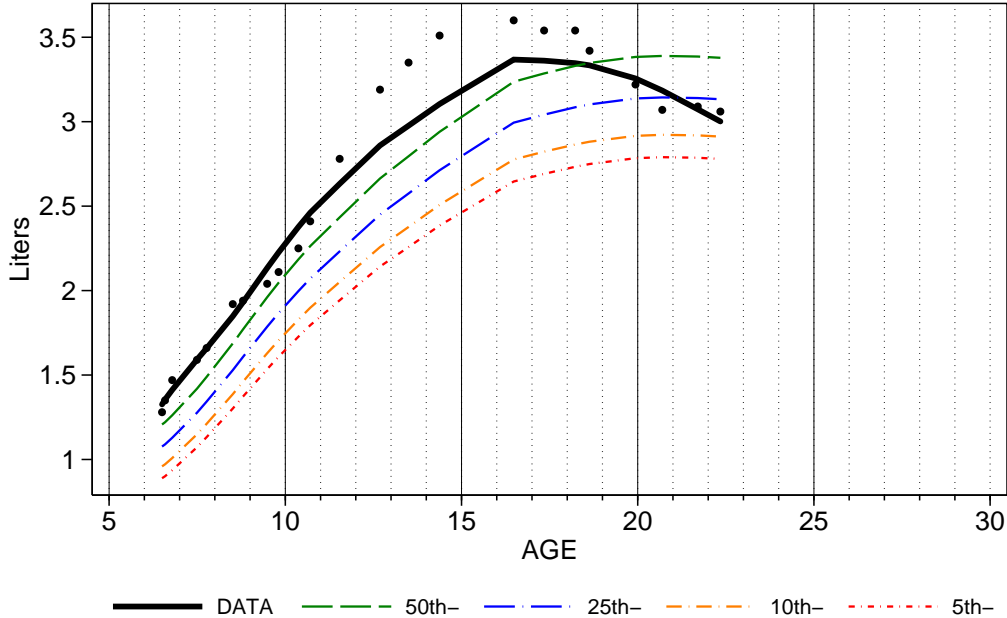

1618

**PATTERN OF GROWTH/DECLINE (Check One)**

- ( 1) Normal Growth
- ( 2) Normal Growth, Early Decline
- ( 3) Reduced Growth
- ( 4) Reduced Growth, Early Decline
- ( 9) Undetermined Pattern
- ( 8) Undetermined - not enough data

Maximum lung growth attained: ( 1) Yes ( 0) No

Plateau started: ( 2) No plateau ( 1) Yes ( 0) No

Decline started: ( 1) Yes ( 0) No

AGE AT each of the following periods (use '99' if N/A):

Maximum Lung Growth: \_\_\_\_ . \_\_\_\_

Start of Plateau: \_\_\_\_ . \_\_\_\_

Start of Decline: \_\_\_\_ . \_\_\_\_

### Pre-BD FEV1 Data and Percentiles: 1625

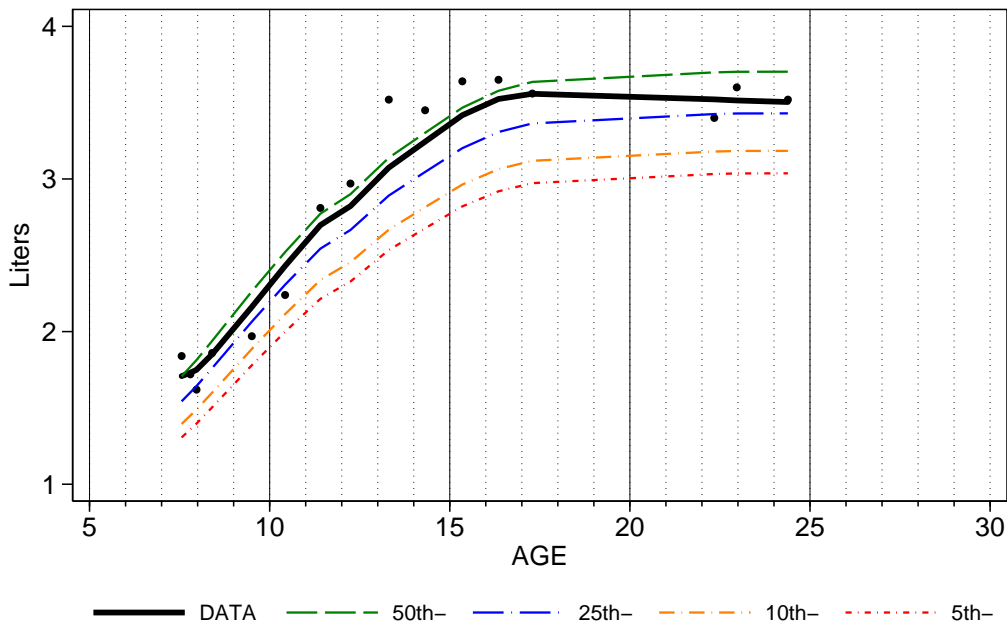

1625

**PATTERN OF GROWTH/DECLINE (Check One)**

- ( 1 ) Normal Growth
- ( 2 ) Normal Growth, Early Decline
- ( 3 ) Reduced Growth
- ( 4 ) Reduced Growth, Early Decline
- ( 9 ) Undetermined Pattern
- ( 8 ) Undetermined - not enough data

Maximum lung growth attained: ( 1 ) Yes ( 0 ) No

Plateau started: ( 2 ) No plateau ( 1 ) Yes ( 0 ) No

Decline started: ( 1 ) Yes ( 0 ) No

AGE AT each of the following periods (use '99' if N/A):

Maximum Lung Growth: \_\_\_\_ . \_\_\_\_

Start of Plateau: \_\_\_\_ . \_\_\_\_

Start of Decline: \_\_\_\_ . \_\_\_\_

### Pre-BD FEV1 Data and Percentiles: 1626

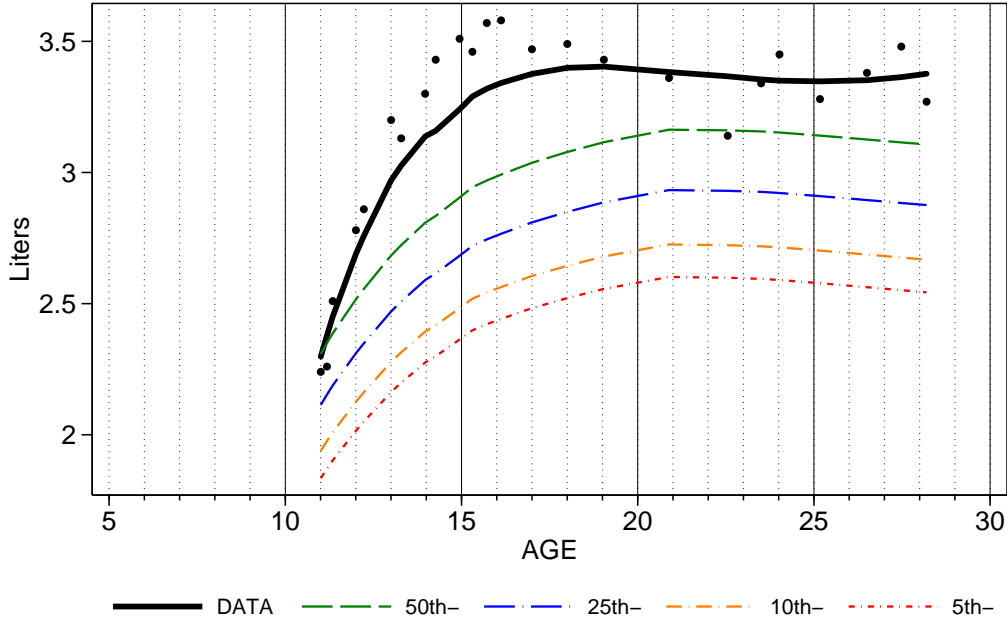

1626

**PATTERN OF GROWTH/DECLINE (Check One)**

- ( 1) Normal Growth
- ( 2) Normal Growth, Early Decline
- ( 3) Reduced Growth
- ( 4) Reduced Growth, Early Decline
- ( 9) Undetermined Pattern
- ( 8) Undetermined - not enough data

Maximum lung growth attained: ( 1) Yes ( 0) No

Plateau started: ( 2) No plateau ( 1) Yes ( 0) No

Decline started: ( 1) Yes ( 0) No

AGE AT each of the following periods (use '99' if N/A):

Maximum Lung Growth: \_\_\_\_ . \_\_\_\_

Start of Plateau: \_\_\_\_ . \_\_\_\_

Start of Decline: \_\_\_\_ . \_\_\_\_

### Pre-BD FEV1 Data and Percentiles: 1632

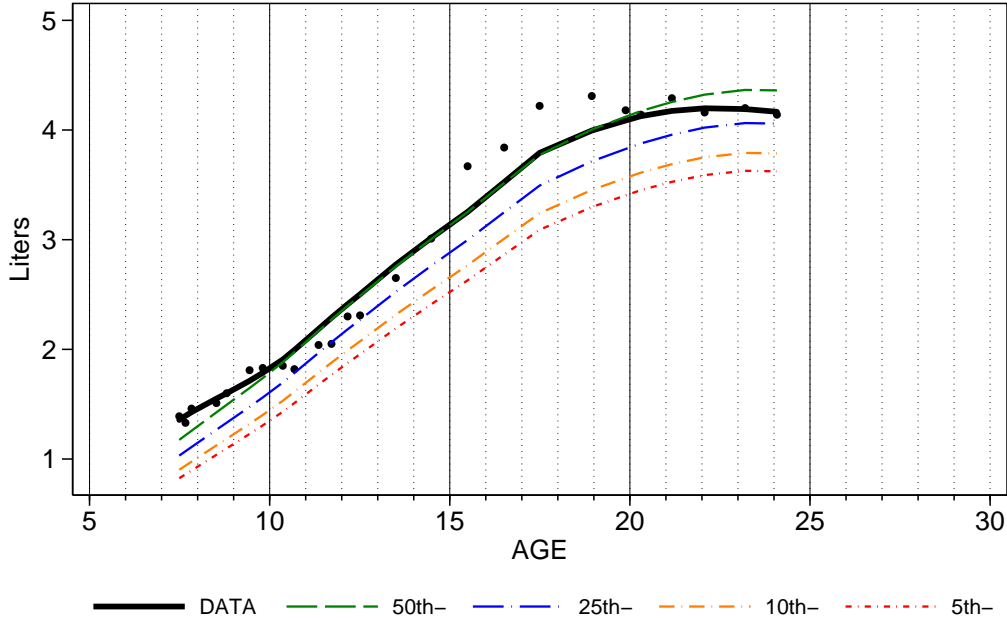

1632

**PATTERN OF GROWTH/DECLINE (Check One)**

- ( 1) Normal Growth
- ( 2) Normal Growth, Early Decline
- ( 3) Reduced Growth
- ( 4) Reduced Growth, Early Decline
- ( 9) Undetermined Pattern
- ( 8) Undetermined - not enough data

Maximum lung growth attained: ( 1) Yes ( 0) No

Plateau started: ( 2) No plateau ( 1) Yes ( 0) No

Decline started: ( 1) Yes ( 0) No

AGE AT each of the following periods (use '99' if N/A):

Maximum Lung Growth: \_\_\_\_ . \_\_\_\_

Start of Plateau: \_\_\_\_ . \_\_\_\_

Start of Decline: \_\_\_\_ . \_\_\_\_

### Pre-BD FEV1 Data and Percentiles: 1634

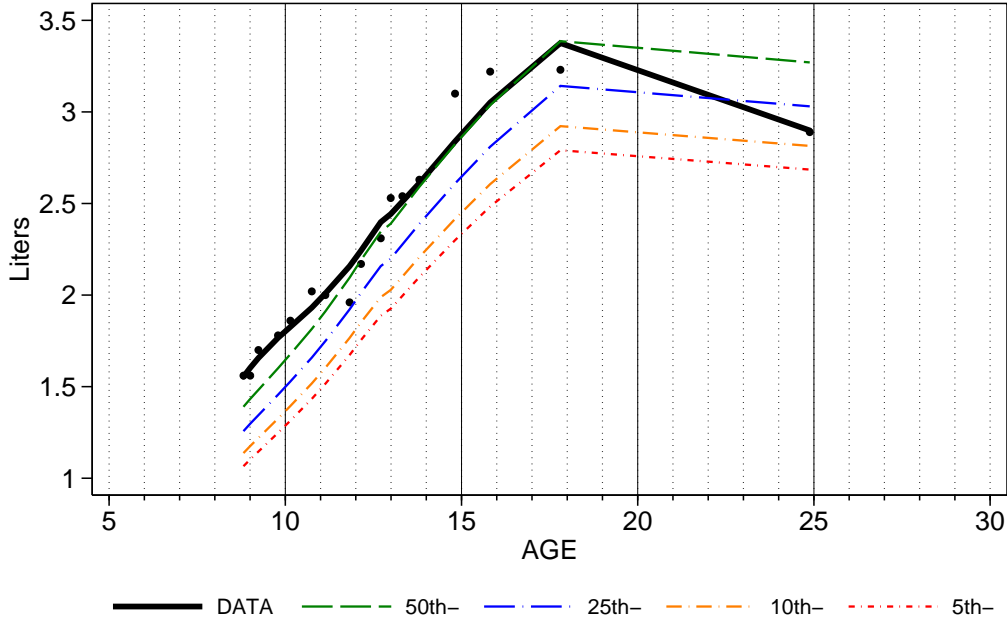

1634

**PATTERN OF GROWTH/DECLINE (Check One)**

- ( 1) Normal Growth
- ( 2) Normal Growth, Early Decline
- ( 3) Reduced Growth
- ( 4) Reduced Growth, Early Decline
- ( 9) Undetermined Pattern
- ( 8) Undetermined - not enough data

Maximum lung growth attained: ( 1) Yes ( 0) No

Plateau started: ( 2) No plateau ( 1) Yes ( 0) No

Decline started: ( 1) Yes ( 0) No

AGE AT each of the following periods (use '99' if N/A):

Maximum Lung Growth: \_\_\_\_ . \_\_\_\_

Start of Plateau: \_\_\_\_ . \_\_\_\_

Start of Decline: \_\_\_\_ . \_\_\_\_

### Pre-BD FEV1 Data and Percentiles: 1647

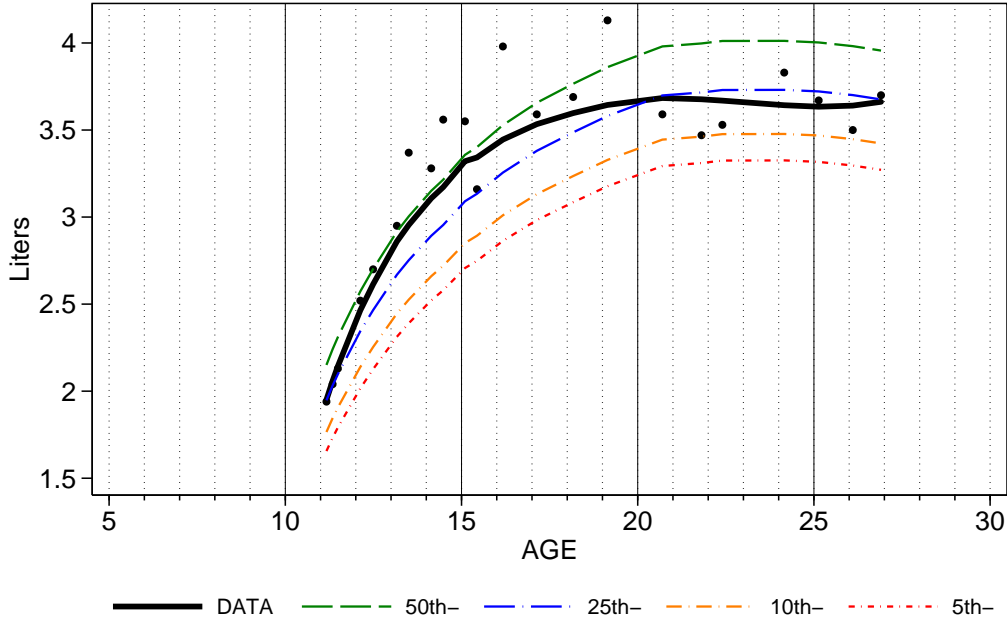

1647

**PATTERN OF GROWTH/DECLINE (Check One)**

- ( 1) Normal Growth
- ( 2) Normal Growth, Early Decline
- ( 3) Reduced Growth
- ( 4) Reduced Growth, Early Decline
- ( 9) Undetermined Pattern
- ( 8) Undetermined - not enough data

Maximum lung growth attained: ( 1) Yes ( 0) No

Plateau started: ( 2) No plateau ( 1) Yes ( 0) No

Decline started: ( 1) Yes ( 0) No

AGE AT each of the following periods (use '99' if N/A):

Maximum Lung Growth: \_\_\_\_ . \_\_\_\_

Start of Plateau: \_\_\_\_ . \_\_\_\_

Start of Decline: \_\_\_\_ . \_\_\_\_

### Pre-BD FEV1 Data and Percentiles: 1663

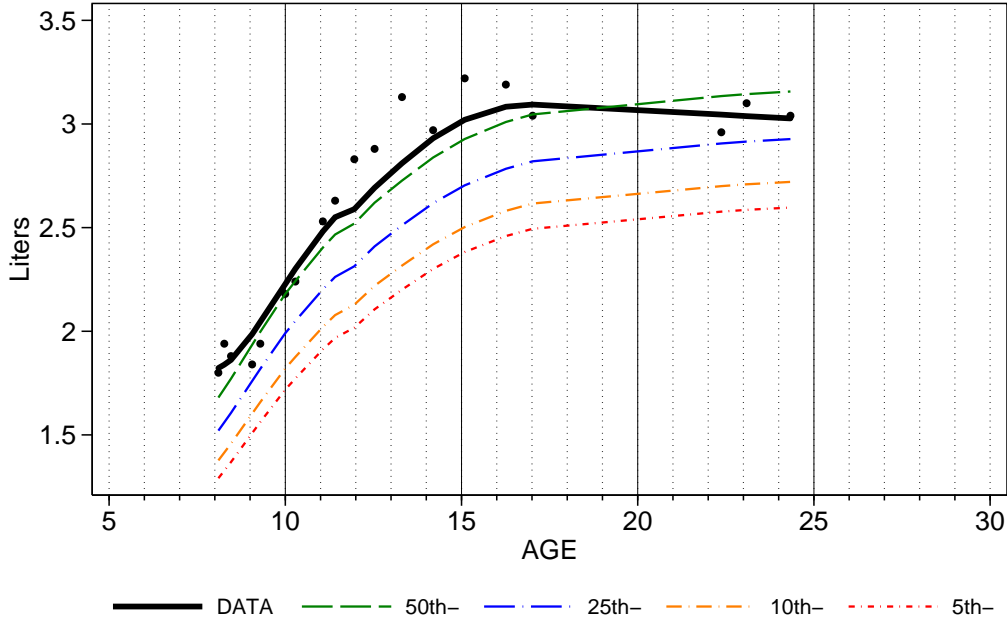

1663

**PATTERN OF GROWTH/DECLINE (Check One)**

- ( 1) Normal Growth
- ( 2) Normal Growth, Early Decline
- ( 3) Reduced Growth
- ( 4) Reduced Growth, Early Decline
- ( 9) Undetermined Pattern
- ( 8) Undetermined - not enough data

Maximum lung growth attained: ( 1) Yes ( 0) No

Plateau started: ( 2) No plateau ( 1) Yes ( 0) No

Decline started: ( 1) Yes ( 0) No

AGE AT each of the following periods (use '99' if N/A):

Maximum Lung Growth: \_\_\_\_ . \_\_\_\_

Start of Plateau: \_\_\_\_ . \_\_\_\_

Start of Decline: \_\_\_\_ . \_\_\_\_



### Pre-BD FEV1 Data and Percentiles: 1666

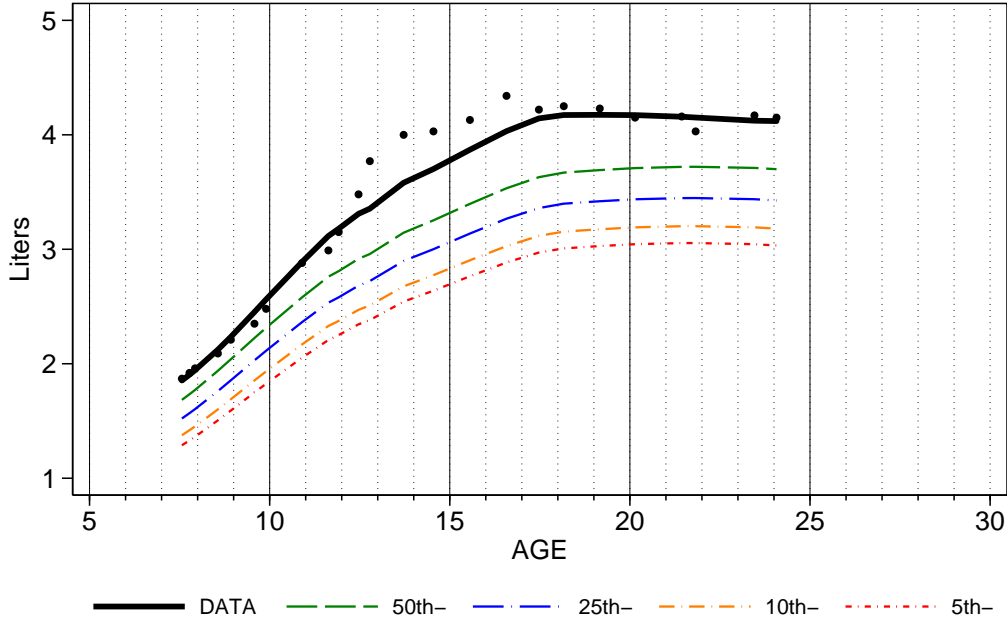

1666

**PATTERN OF GROWTH/DECLINE (Check One)**

- ( 1) Normal Growth
- ( 2) Normal Growth, Early Decline
- ( 3) Reduced Growth
- ( 4) Reduced Growth, Early Decline
- ( 9) Undetermined Pattern
- ( 8) Undetermined - not enough data

Maximum lung growth attained: ( 1) Yes ( 0) No

Plateau started: ( 2) No plateau ( 1) Yes ( 0) No

Decline started: ( 1) Yes ( 0) No

AGE AT each of the following periods (use '99' if N/A):

Maximum Lung Growth: \_\_\_\_ . \_\_\_\_

Start of Plateau: \_\_\_\_ . \_\_\_\_

Start of Decline: \_\_\_\_ . \_\_\_\_

### Pre-BD FEV1 Data and Percentiles: 1668

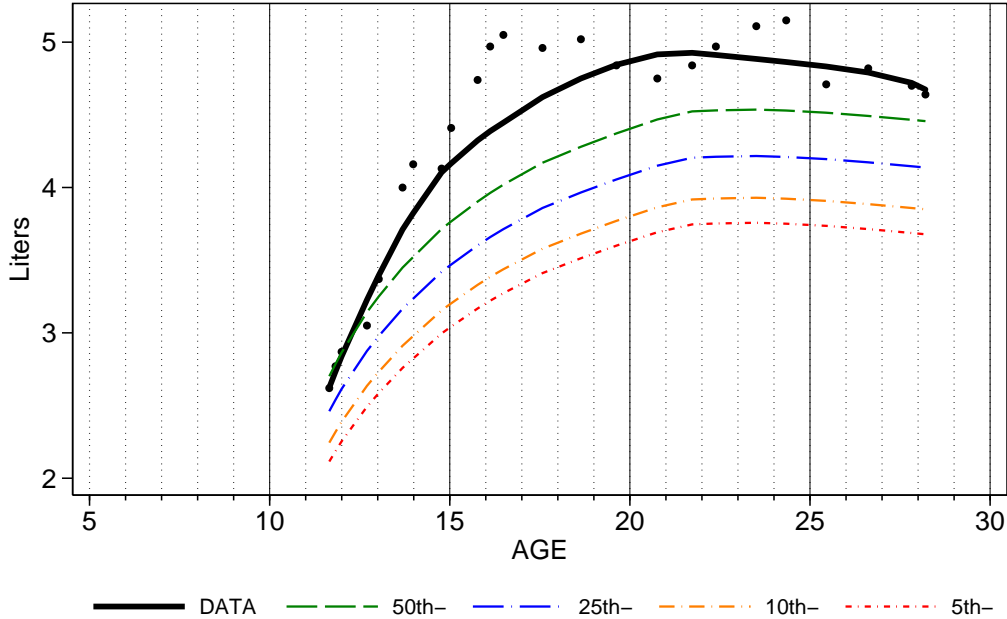

1668

**PATTERN OF GROWTH/DECLINE (Check One)**

- ( 1) Normal Growth
- ( 2) Normal Growth, Early Decline
- ( 3) Reduced Growth
- ( 4) Reduced Growth, Early Decline
- ( 9) Undetermined Pattern
- ( 8) Undetermined - not enough data

Maximum lung growth attained: ( 1) Yes ( 0) No

Plateau started: ( 2) No plateau ( 1) Yes ( 0) No

Decline started: ( 1) Yes ( 0) No

AGE AT each of the following periods (use '99' if N/A):

Maximum Lung Growth: \_\_\_\_ . \_\_\_\_

Start of Plateau: \_\_\_\_ . \_\_\_\_

Start of Decline: \_\_\_\_ . \_\_\_\_

### Pre-BD FEV1 Data and Percentiles: 1669

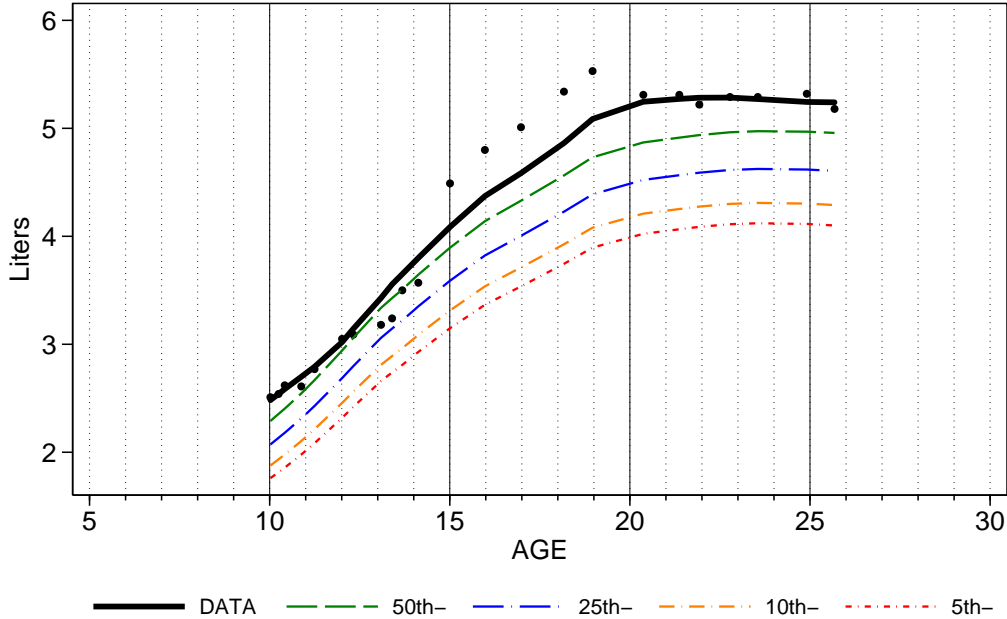

1669

**PATTERN OF GROWTH/DECLINE (Check One)**

- ( 1 ) Normal Growth
- ( 2 ) Normal Growth, Early Decline
- ( 3 ) Reduced Growth
- ( 4 ) Reduced Growth, Early Decline
- ( 9 ) Undetermined Pattern
- ( 8 ) Undetermined - not enough data

Maximum lung growth attained: ( 1 ) Yes ( 0 ) No

Plateau started: ( 2 ) No plateau ( 1 ) Yes ( 0 ) No

Decline started: ( 1 ) Yes ( 0 ) No

AGE AT each of the following periods (use '99' if N/A):

Maximum Lung Growth: \_\_\_\_ . \_\_\_\_

Start of Plateau: \_\_\_\_ . \_\_\_\_

Start of Decline: \_\_\_\_ . \_\_\_\_

### Pre-BD FEV1 Data and Percentiles: 1675

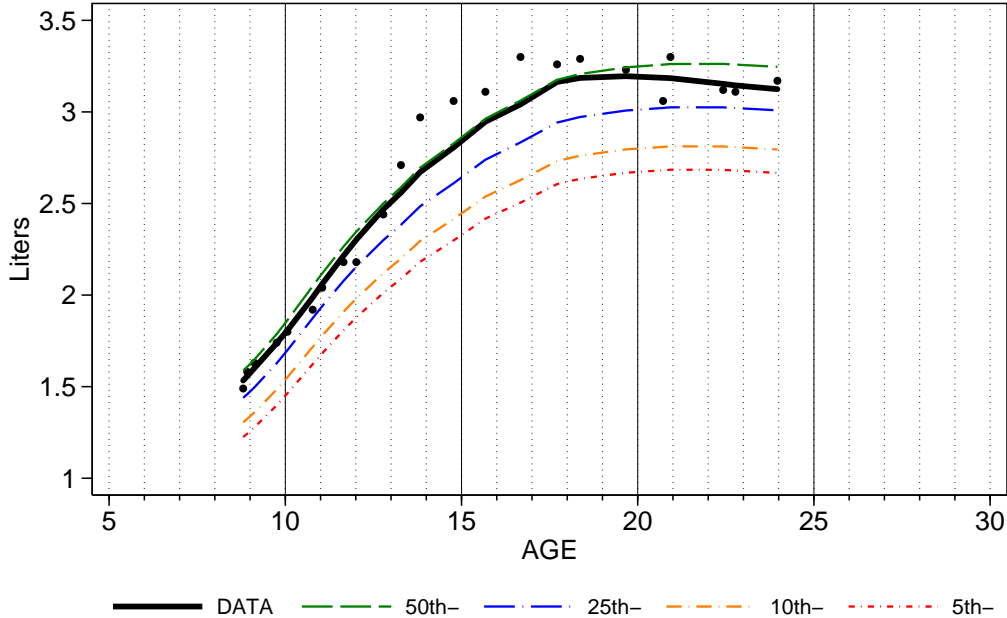

1675

**PATTERN OF GROWTH/DECLINE (Check One)**

- ( 1) Normal Growth
- ( 2) Normal Growth, Early Decline
- ( 3) Reduced Growth
- ( 4) Reduced Growth, Early Decline
- ( 9) Undetermined Pattern
- ( 8) Undetermined - not enough data

Maximum lung growth attained: ( 1) Yes ( 0) No

Plateau started: ( 2) No plateau ( 1) Yes ( 0) No

Decline started: ( 1) Yes ( 0) No

AGE AT each of the following periods (use '99' if N/A):

Maximum Lung Growth: \_\_\_\_ . \_\_\_\_

Start of Plateau: \_\_\_\_ . \_\_\_\_

Start of Decline: \_\_\_\_ . \_\_\_\_

### Pre-BD FEV1 Data and Percentiles: 1677

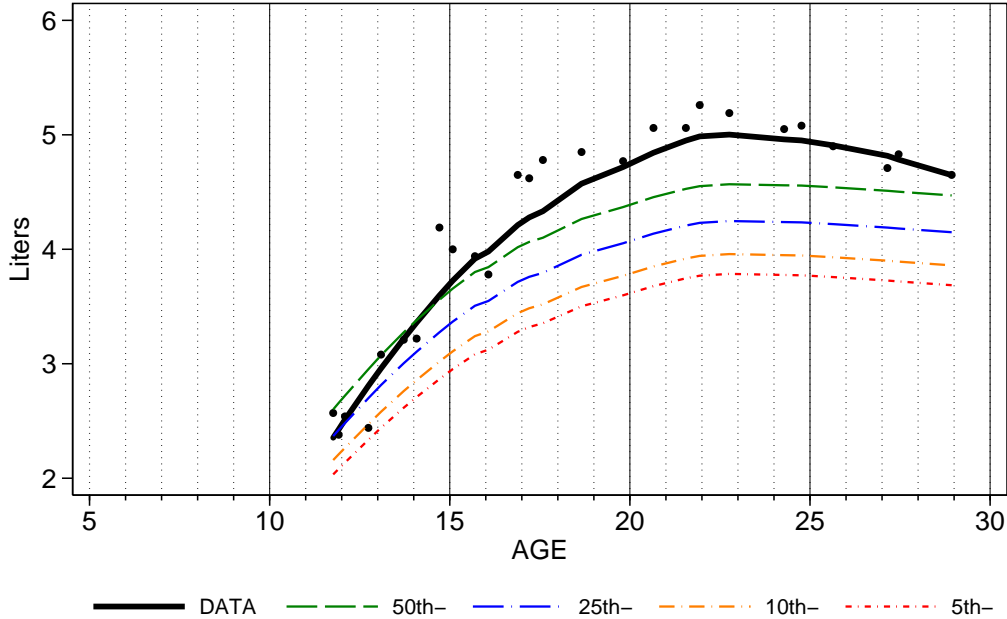

1677

**PATTERN OF GROWTH/DECLINE (Check One)**

- ( 1 ) Normal Growth
- ( 2 ) Normal Growth, Early Decline
- ( 3 ) Reduced Growth
- ( 4 ) Reduced Growth, Early Decline
- ( 9 ) Undetermined Pattern
- ( 8 ) Undetermined - not enough data

Maximum lung growth attained: ( 1 ) Yes ( 0 ) No

Plateau started: ( 2 ) No plateau ( 1 ) Yes ( 0 ) No

Decline started: ( 1 ) Yes ( 0 ) No

AGE AT each of the following periods (use '99' if N/A):

Maximum Lung Growth: \_\_\_\_ . \_\_\_\_

Start of Plateau: \_\_\_\_ . \_\_\_\_

Start of Decline: \_\_\_\_ . \_\_\_\_

### Pre-BD FEV1 Data and Percentiles: 1679

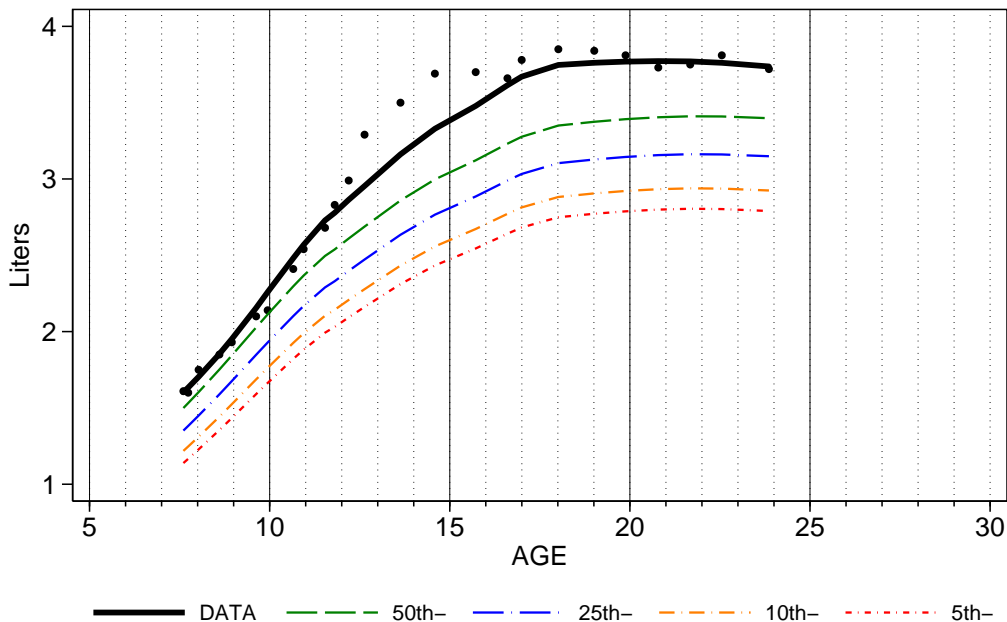

1679

**PATTERN OF GROWTH/DECLINE (Check One)**

- ( 1) Normal Growth
- ( 2) Normal Growth, Early Decline
- ( 3) Reduced Growth
- ( 4) Reduced Growth, Early Decline
- ( 9) Undetermined Pattern
- ( 8) Undetermined - not enough data

Maximum lung growth attained: ( 1) Yes ( 0) No

Plateau started: ( 2) No plateau ( 1) Yes ( 0) No

Decline started: ( 1) Yes ( 0) No

AGE AT each of the following periods (use '99' if N/A):

Maximum Lung Growth: \_\_\_\_ . \_\_\_\_

Start of Plateau: \_\_\_\_ . \_\_\_\_

Start of Decline: \_\_\_\_ . \_\_\_\_

### Pre-BD FEV1 Data and Percentiles: 1690

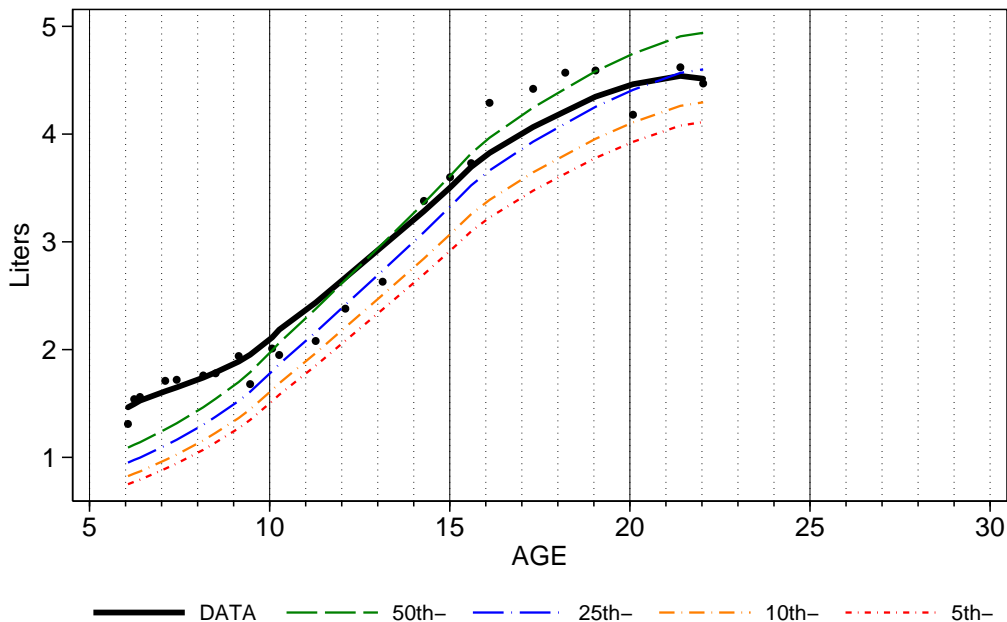

1690

**PATTERN OF GROWTH/DECLINE (Check One)**

- ( 1) Normal Growth
- ( 2) Normal Growth, Early Decline
- ( 3) Reduced Growth
- ( 4) Reduced Growth, Early Decline
- ( 9) Undetermined Pattern
- ( 8) Undetermined - not enough data

Maximum lung growth attained: ( 1) Yes ( 0) No

Plateau started: ( 2) No plateau ( 1) Yes ( 0) No

Decline started: ( 1) Yes ( 0) No

AGE AT each of the following periods (use '99' if N/A):

Maximum Lung Growth: \_\_\_\_ . \_\_\_\_

Start of Plateau: \_\_\_\_ . \_\_\_\_

Start of Decline: \_\_\_\_ . \_\_\_\_

### Pre-BD FEV1 Data and Percentiles: 1707

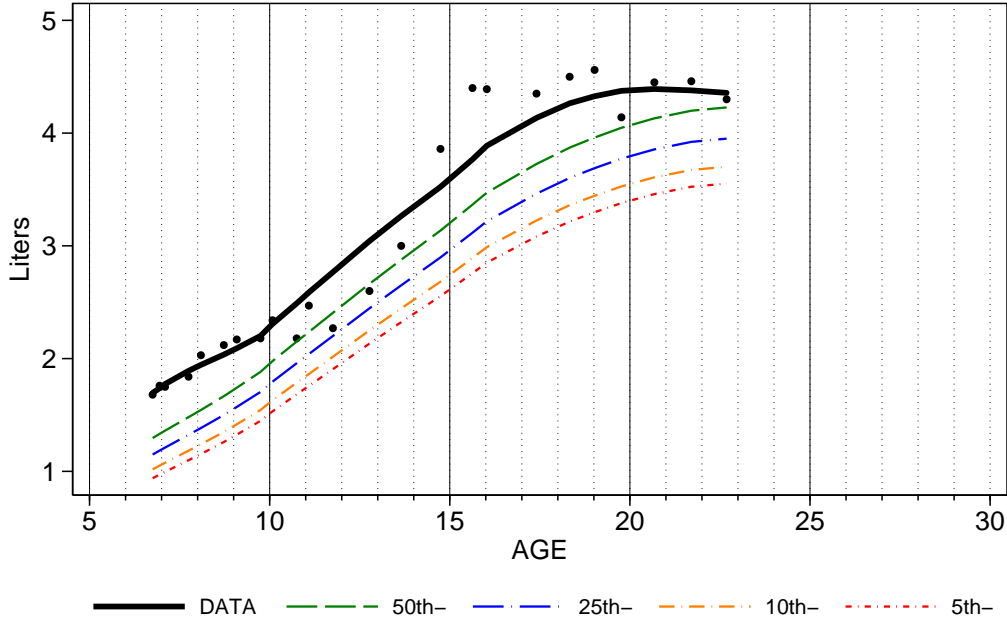

1707

**PATTERN OF GROWTH/DECLINE (Check One)**

- ( 1 ) Normal Growth
- ( 2 ) Normal Growth, Early Decline
- ( 3 ) Reduced Growth
- ( 4 ) Reduced Growth, Early Decline
- ( 9 ) Undetermined Pattern
- ( 8 ) Undetermined - not enough data

Maximum lung growth attained: ( 1 ) Yes ( 0 ) No

Plateau started: ( 2 ) No plateau ( 1 ) Yes ( 0 ) No

Decline started: ( 1 ) Yes ( 0 ) No

AGE AT each of the following periods (use '99' if N/A):

Maximum Lung Growth: \_\_\_\_ . \_\_\_\_

Start of Plateau: \_\_\_\_ . \_\_\_\_

Start of Decline: \_\_\_\_ . \_\_\_\_



### Pre-BD FEV1 Data and Percentiles: 1711

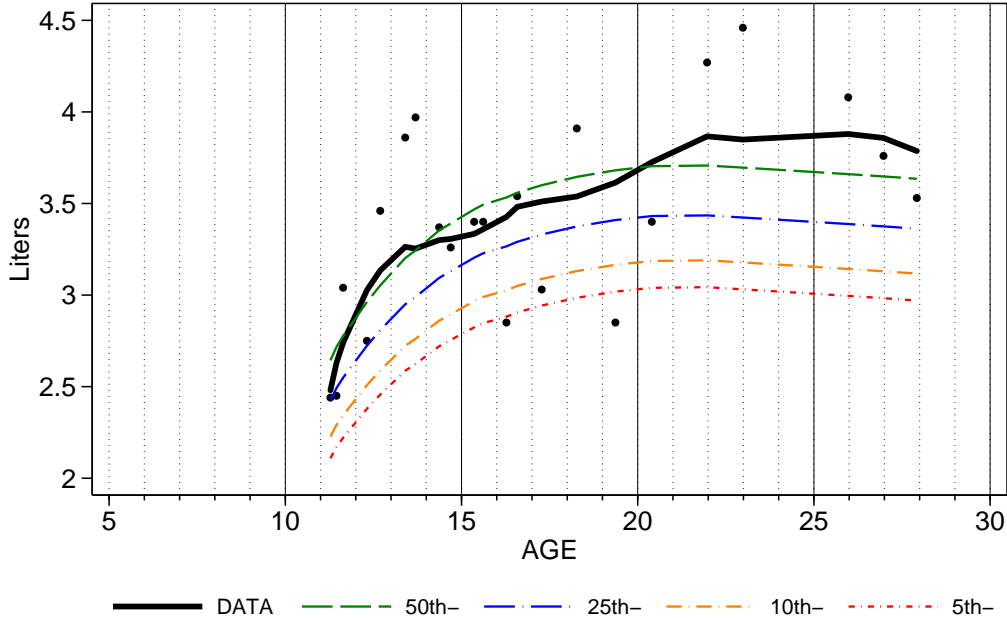

1711

**PATTERN OF GROWTH/DECLINE (Check One)**

- ( 1) Normal Growth
- ( 2) Normal Growth, Early Decline
- ( 3) Reduced Growth
- ( 4) Reduced Growth, Early Decline
- ( 9) Undetermined Pattern
- ( 8) Undetermined - not enough data

Maximum lung growth attained: ( 1) Yes ( 0) No

Plateau started: ( 2) No plateau ( 1) Yes ( 0) No

Decline started: ( 1) Yes ( 0) No

AGE AT each of the following periods (use '99' if N/A):

Maximum Lung Growth: \_\_\_\_ . \_\_\_\_

Start of Plateau: \_\_\_\_ . \_\_\_\_

Start of Decline: \_\_\_\_ . \_\_\_\_

### Pre-BD FEV1 Data and Percentiles: 1716

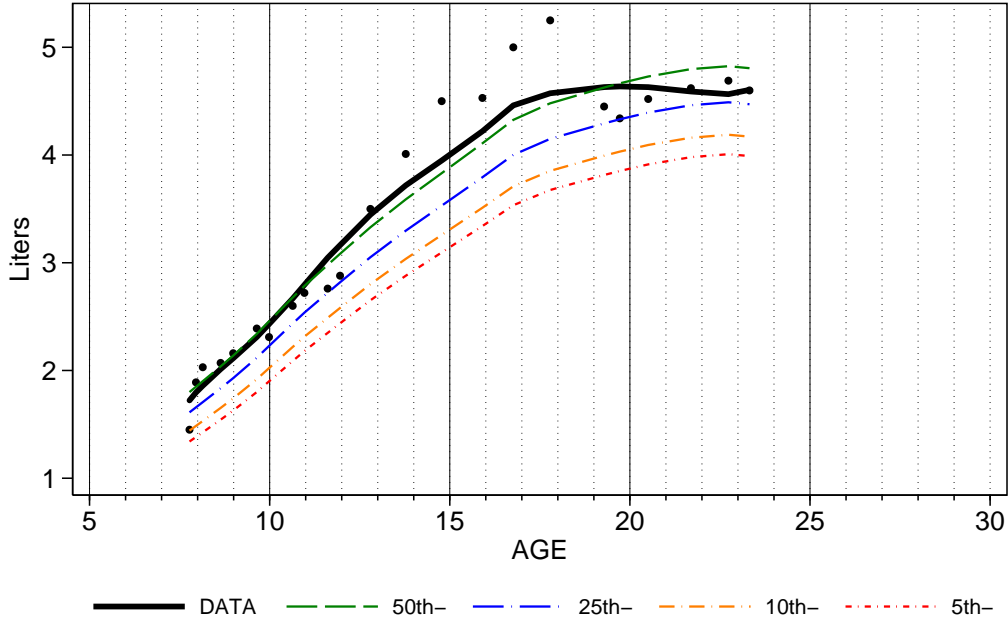

1716

**PATTERN OF GROWTH/DECLINE (Check One)**

- ( 1 ) Normal Growth
- ( 2 ) Normal Growth, Early Decline
- ( 3 ) Reduced Growth
- ( 4 ) Reduced Growth, Early Decline
- ( 9 ) Undetermined Pattern
- ( 8 ) Undetermined - not enough data

Maximum lung growth attained: ( 1 ) Yes ( 0 ) No

Plateau started: ( 2 ) No plateau ( 1 ) Yes ( 0 ) No

Decline started: ( 1 ) Yes ( 0 ) No

AGE AT each of the following periods (use '99' if N/A):

Maximum Lung Growth: \_\_\_\_ . \_\_\_\_

Start of Plateau: \_\_\_\_ . \_\_\_\_

Start of Decline: \_\_\_\_ . \_\_\_\_

### Pre-BD FEV1 Data and Percentiles: 1719

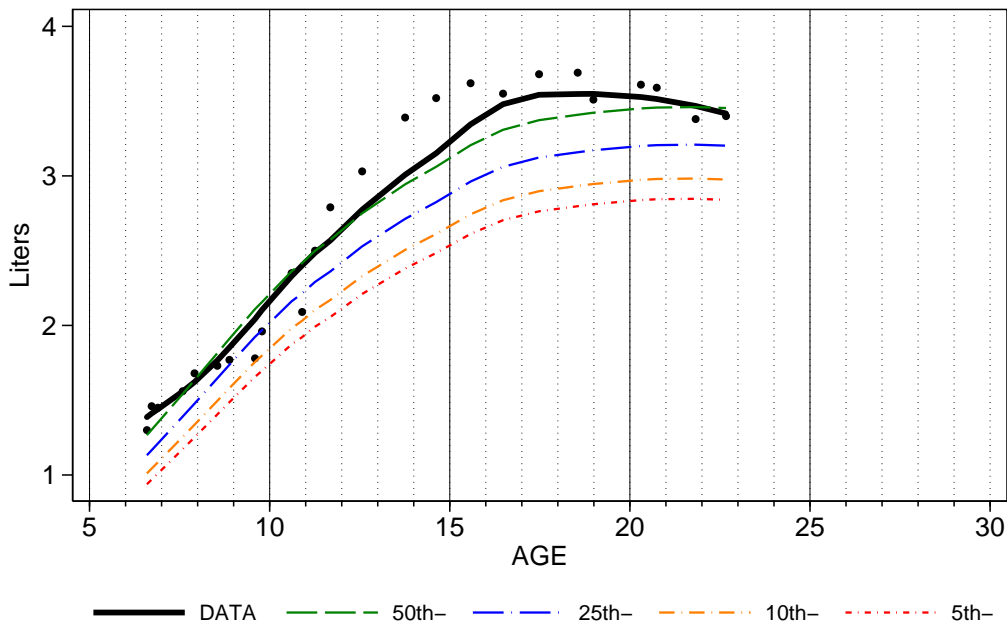

1719

**PATTERN OF GROWTH/DECLINE (Check One)**

- ( 1) Normal Growth
- ( 2) Normal Growth, Early Decline
- ( 3) Reduced Growth
- ( 4) Reduced Growth, Early Decline
- ( 9) Undetermined Pattern
- ( 8) Undetermined - not enough data

Maximum lung growth attained: ( 1) Yes ( 0) No

Plateau started: ( 2) No plateau ( 1) Yes ( 0) No

Decline started: ( 1) Yes ( 0) No

AGE AT each of the following periods (use '99' if N/A):

Maximum Lung Growth: \_\_\_\_ . \_\_\_\_

Start of Plateau: \_\_\_\_ . \_\_\_\_

Start of Decline: \_\_\_\_ . \_\_\_\_

### Pre-BD FEV1 Data and Percentiles: 1725

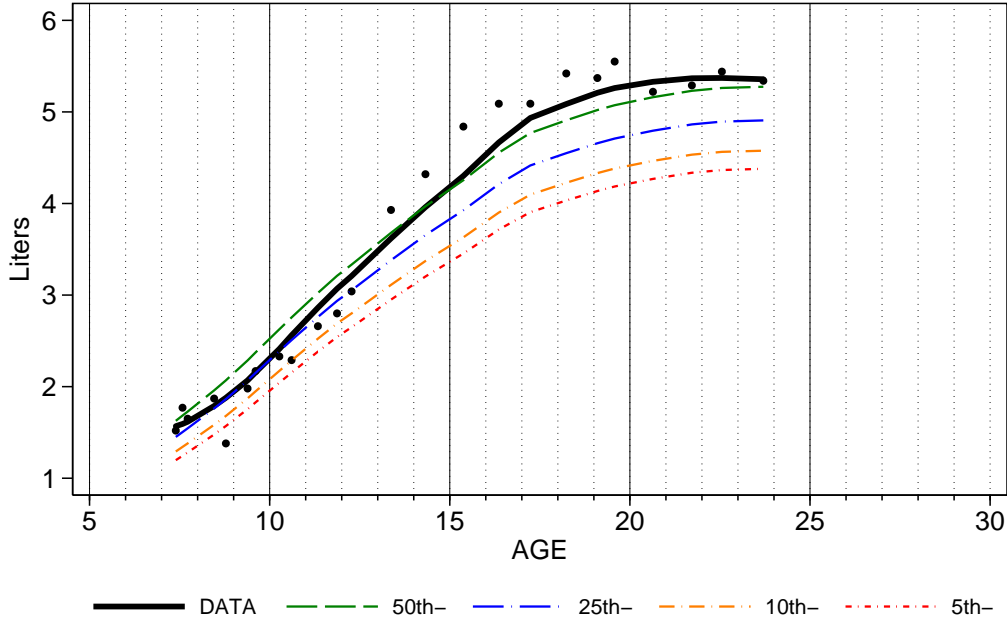

1725

**PATTERN OF GROWTH/DECLINE (Check One)**

- ( 1 ) Normal Growth
- ( 2 ) Normal Growth, Early Decline
- ( 3 ) Reduced Growth
- ( 4 ) Reduced Growth, Early Decline
- ( 9 ) Undetermined Pattern
- ( 8 ) Undetermined - not enough data

Maximum lung growth attained: ( 1 ) Yes ( 0 ) No

Plateau started: ( 2 ) No plateau ( 1 ) Yes ( 0 ) No

Decline started: ( 1 ) Yes ( 0 ) No

AGE AT each of the following periods (use '99' if N/A):

Maximum Lung Growth: \_\_\_\_ . \_\_\_\_

Start of Plateau: \_\_\_\_ . \_\_\_\_

Start of Decline: \_\_\_\_ . \_\_\_\_

### Pre-BD FEV1 Data and Percentiles: 1731

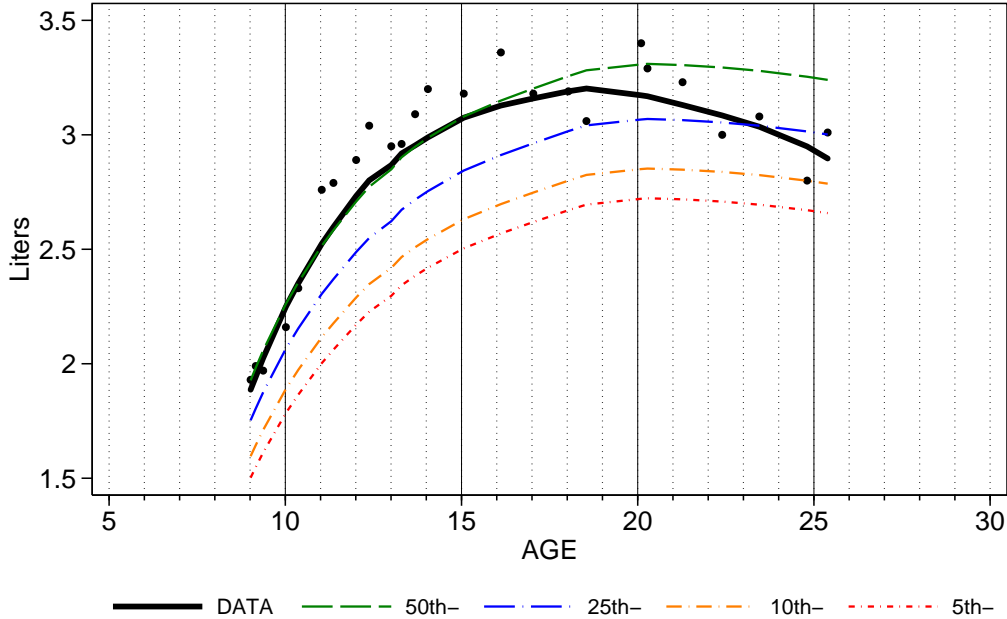

1731

**PATTERN OF GROWTH/DECLINE (Check One)**

- ( 1) Normal Growth
- ( 2) Normal Growth, Early Decline
- ( 3) Reduced Growth
- ( 4) Reduced Growth, Early Decline
- ( 9) Undetermined Pattern
- ( 8) Undetermined - not enough data

Maximum lung growth attained: ( 1) Yes ( 0) No

Plateau started: ( 2) No plateau ( 1) Yes ( 0) No

Decline started: ( 1) Yes ( 0) No

AGE AT each of the following periods (use '99' if N/A):

Maximum Lung Growth: \_\_\_\_ . \_\_\_\_

Start of Plateau: \_\_\_\_ . \_\_\_\_

Start of Decline: \_\_\_\_ . \_\_\_\_

### Pre-BD FEV1 Data and Percentiles: 1732

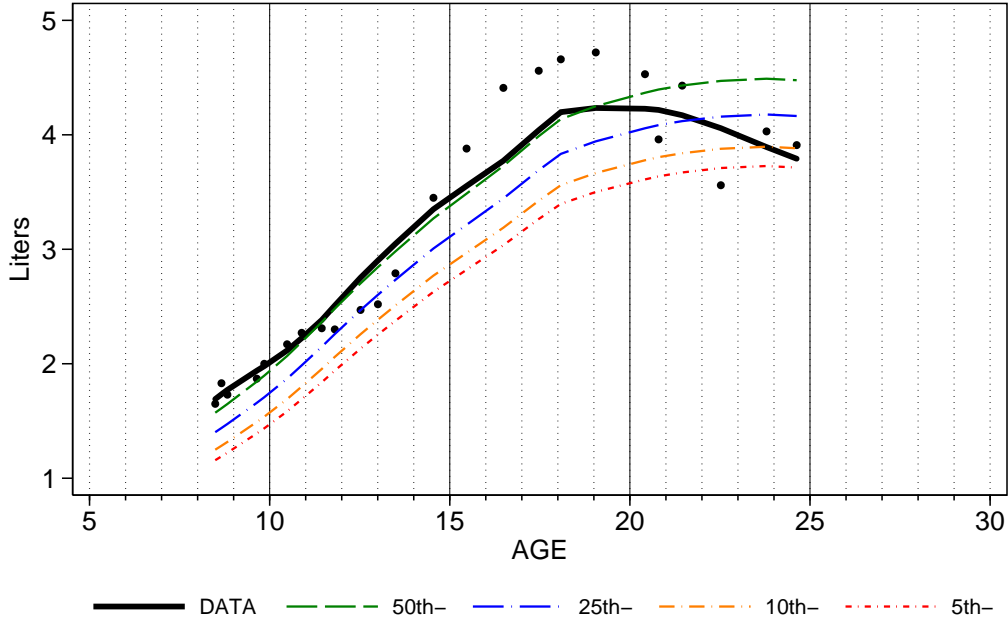

1732

**PATTERN OF GROWTH/DECLINE (Check One)**

- ( 1 ) Normal Growth
- ( 2 ) Normal Growth, Early Decline
- ( 3 ) Reduced Growth
- ( 4 ) Reduced Growth, Early Decline
- ( 9 ) Undetermined Pattern
- ( 8 ) Undetermined - not enough data

Maximum lung growth attained: ( 1 ) Yes ( 0 ) No

Plateau started: ( 2 ) No plateau ( 1 ) Yes ( 0 ) No

Decline started: ( 1 ) Yes ( 0 ) No

AGE AT each of the following periods (use '99' if N/A):

Maximum Lung Growth: \_\_\_\_ . \_\_\_\_

Start of Plateau: \_\_\_\_ . \_\_\_\_

Start of Decline: \_\_\_\_ . \_\_\_\_

### Pre-BD FEV1 Data and Percentiles: 1741

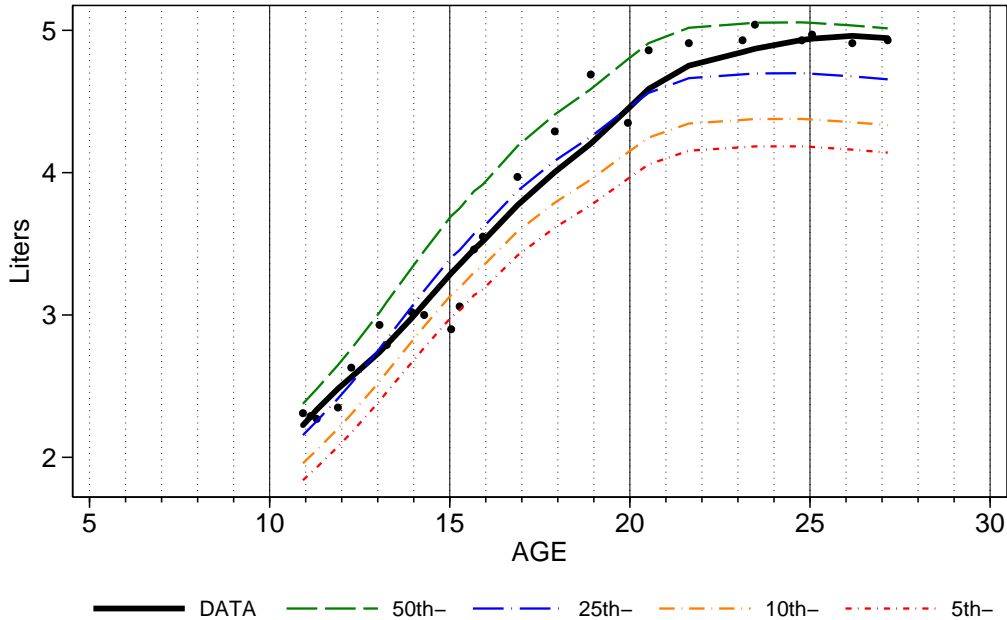

1741

**PATTERN OF GROWTH/DECLINE (Check One)**

- ( 1 ) Normal Growth
- ( 2 ) Normal Growth, Early Decline
- ( 3 ) Reduced Growth
- ( 4 ) Reduced Growth, Early Decline
- ( 9 ) Undetermined Pattern
- ( 8 ) Undetermined - not enough data

Maximum lung growth attained: ( 1 ) Yes ( 0 ) No

Plateau started: ( 2 ) No plateau ( 1 ) Yes ( 0 ) No

Decline started: ( 1 ) Yes ( 0 ) No

AGE AT each of the following periods (use '99' if N/A):

Maximum Lung Growth: \_\_\_\_ . \_\_\_\_

Start of Plateau: \_\_\_\_ . \_\_\_\_

Start of Decline: \_\_\_\_ . \_\_\_\_

### Pre-BD FEV1 Data and Percentiles: 1744

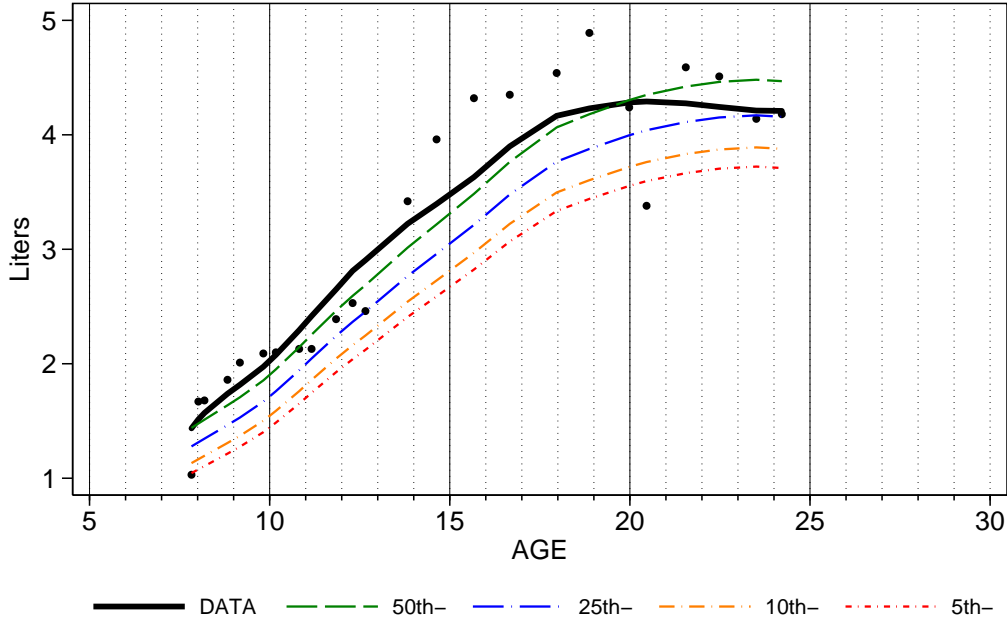

1744

**PATTERN OF GROWTH/DECLINE (Check One)**

- ( 1 ) Normal Growth
- ( 2 ) Normal Growth, Early Decline
- ( 3 ) Reduced Growth
- ( 4 ) Reduced Growth, Early Decline
- ( 9 ) Undetermined Pattern
- ( 8 ) Undetermined - not enough data

Maximum lung growth attained: ( 1 ) Yes ( 0 ) No

Plateau started: ( 2 ) No plateau ( 1 ) Yes ( 0 ) No

Decline started: ( 1 ) Yes ( 0 ) No

AGE AT each of the following periods (use '99' if N/A):

Maximum Lung Growth: \_\_\_\_ . \_\_\_\_

Start of Plateau: \_\_\_\_ . \_\_\_\_

Start of Decline: \_\_\_\_ . \_\_\_\_



### Pre-BD FEV1 Data and Percentiles: 1747

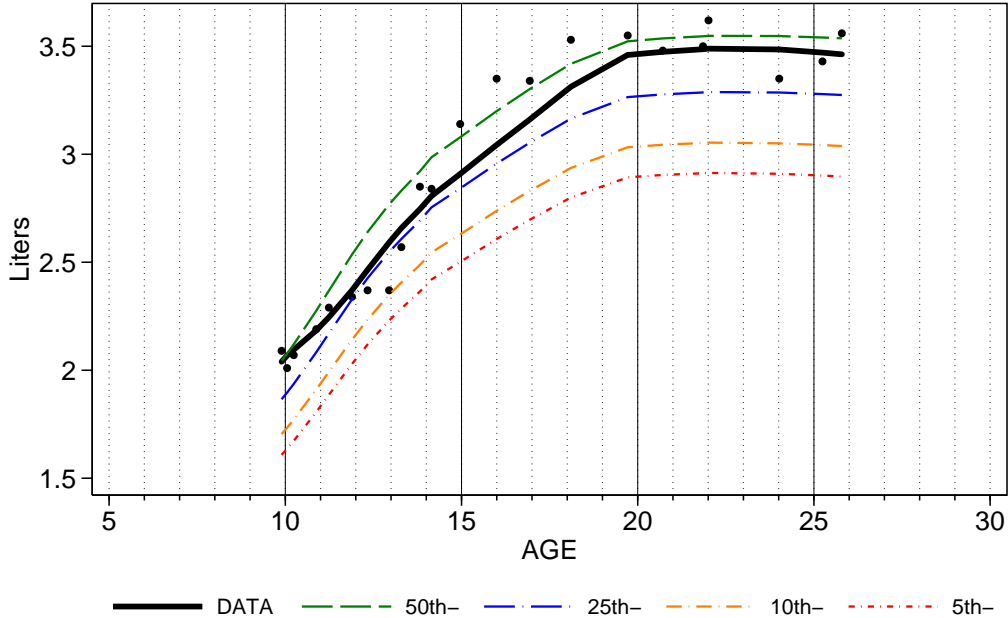

1747

**PATTERN OF GROWTH/DECLINE (Check One)**

- ( 1) Normal Growth
- ( 2) Normal Growth, Early Decline
- ( 3) Reduced Growth
- ( 4) Reduced Growth, Early Decline
- ( 9) Undetermined Pattern
- ( 8) Undetermined - not enough data

Maximum lung growth attained: ( 1) Yes ( 0) No

Plateau started: ( 2) No plateau ( 1) Yes ( 0) No

Decline started: ( 1) Yes ( 0) No

AGE AT each of the following periods (use '99' if N/A):

Maximum Lung Growth: \_\_\_\_ . \_\_\_\_

Start of Plateau: \_\_\_\_ . \_\_\_\_

Start of Decline: \_\_\_\_ . \_\_\_\_

### Pre-BD FEV1 Data and Percentiles: 1753

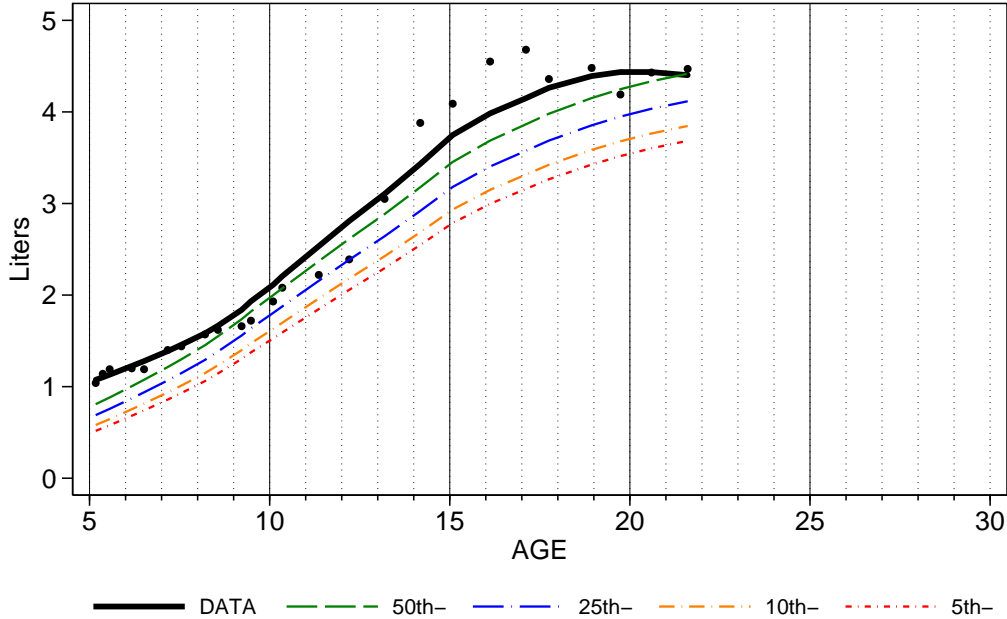

1753

**PATTERN OF GROWTH/DECLINE (Check One)**

- ( 1 ) Normal Growth
- ( 2 ) Normal Growth, Early Decline
- ( 3 ) Reduced Growth
- ( 4 ) Reduced Growth, Early Decline
- ( 9 ) Undetermined Pattern
- ( 8 ) Undetermined - not enough data

Maximum lung growth attained: ( 1 ) Yes ( 0 ) No

Plateau started: ( 2 ) No plateau ( 1 ) Yes ( 0 ) No

Decline started: ( 1 ) Yes ( 0 ) No

AGE AT each of the following periods (use '99' if N/A):

Maximum Lung Growth: \_\_\_\_ . \_\_\_\_

Start of Plateau: \_\_\_\_ . \_\_\_\_

Start of Decline: \_\_\_\_ . \_\_\_\_

### Pre-BD FEV1 Data and Percentiles: 1754

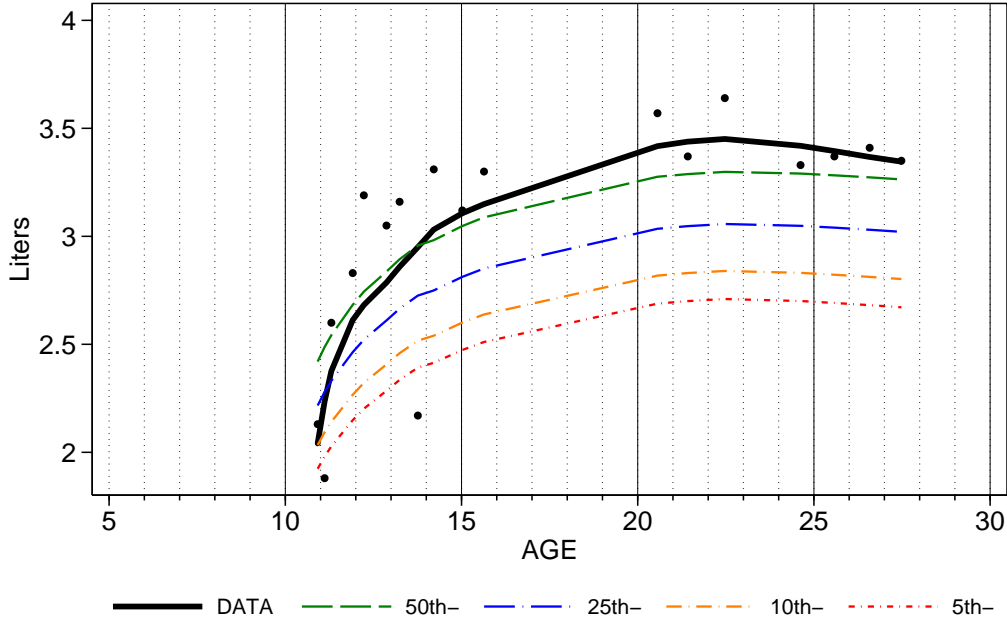

1754

**PATTERN OF GROWTH/DECLINE (Check One)**

- ( 1) Normal Growth
- ( 2) Normal Growth, Early Decline
- ( 3) Reduced Growth
- ( 4) Reduced Growth, Early Decline
- ( 9) Undetermined Pattern
- ( 8) Undetermined - not enough data

Maximum lung growth attained: ( 1) Yes ( 0) No

Plateau started: ( 2) No plateau ( 1) Yes ( 0) No

Decline started: ( 1) Yes ( 0) No

AGE AT each of the following periods (use '99' if N/A):

Maximum Lung Growth: \_\_\_\_ . \_\_\_\_

Start of Plateau: \_\_\_\_ . \_\_\_\_

Start of Decline: \_\_\_\_ . \_\_\_\_

### Pre-BD FEV1 Data and Percentiles: 1761

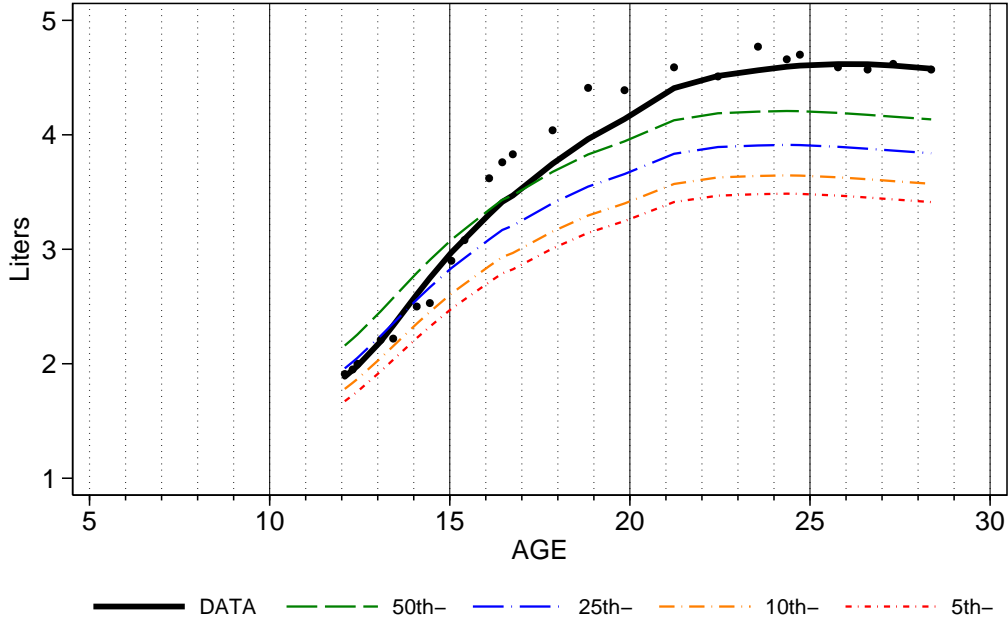

1761

**PATTERN OF GROWTH/DECLINE (Check One)**

- ( 1 ) Normal Growth
- ( 2 ) Normal Growth, Early Decline
- ( 3 ) Reduced Growth
- ( 4 ) Reduced Growth, Early Decline
- ( 9 ) Undetermined Pattern
- ( 8 ) Undetermined - not enough data

Maximum lung growth attained: ( 1 ) Yes ( 0 ) No

Plateau started: ( 2 ) No plateau ( 1 ) Yes ( 0 ) No

Decline started: ( 1 ) Yes ( 0 ) No

AGE AT each of the following periods (use '99' if N/A):

Maximum Lung Growth: \_\_\_\_ . \_\_\_\_

Start of Plateau: \_\_\_\_ . \_\_\_\_

Start of Decline: \_\_\_\_ . \_\_\_\_

### Pre-BD FEV1 Data and Percentiles: 1767

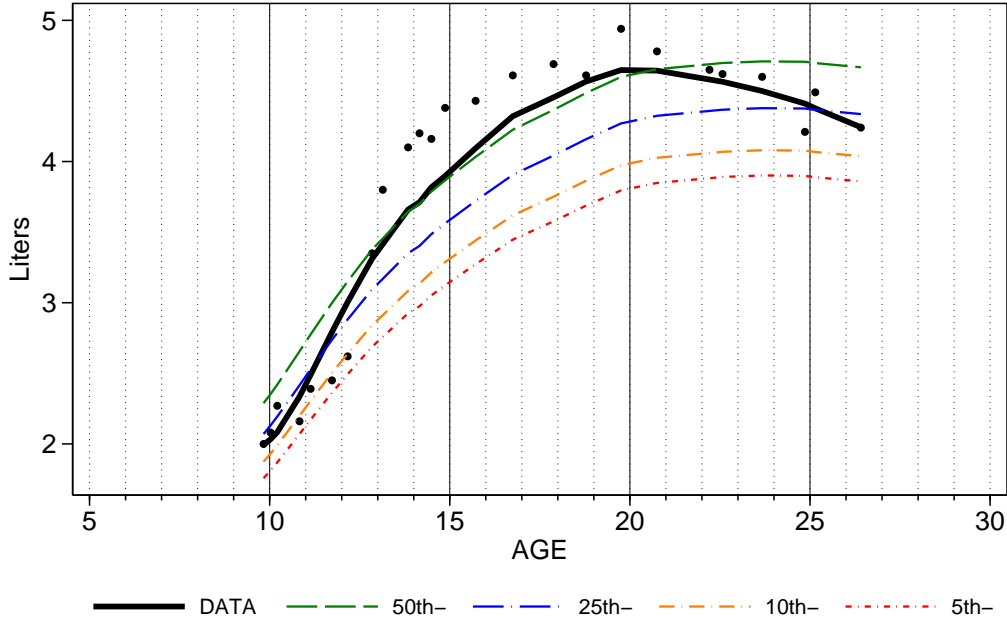

1767

**PATTERN OF GROWTH/DECLINE (Check One)**

- ( 1 ) Normal Growth
- ( 2 ) Normal Growth, Early Decline
- ( 3 ) Reduced Growth
- ( 4 ) Reduced Growth, Early Decline
- ( 9 ) Undetermined Pattern
- ( 8 ) Undetermined - not enough data

Maximum lung growth attained: ( 1 ) Yes ( 0 ) No

Plateau started: ( 2 ) No plateau ( 1 ) Yes ( 0 ) No

Decline started: ( 1 ) Yes ( 0 ) No

AGE AT each of the following periods (use '99' if N/A):

Maximum Lung Growth: \_\_\_\_ . \_\_\_\_

Start of Plateau: \_\_\_\_ . \_\_\_\_

Start of Decline: \_\_\_\_ . \_\_\_\_

### Pre-BD FEV1 Data and Percentiles: 1768

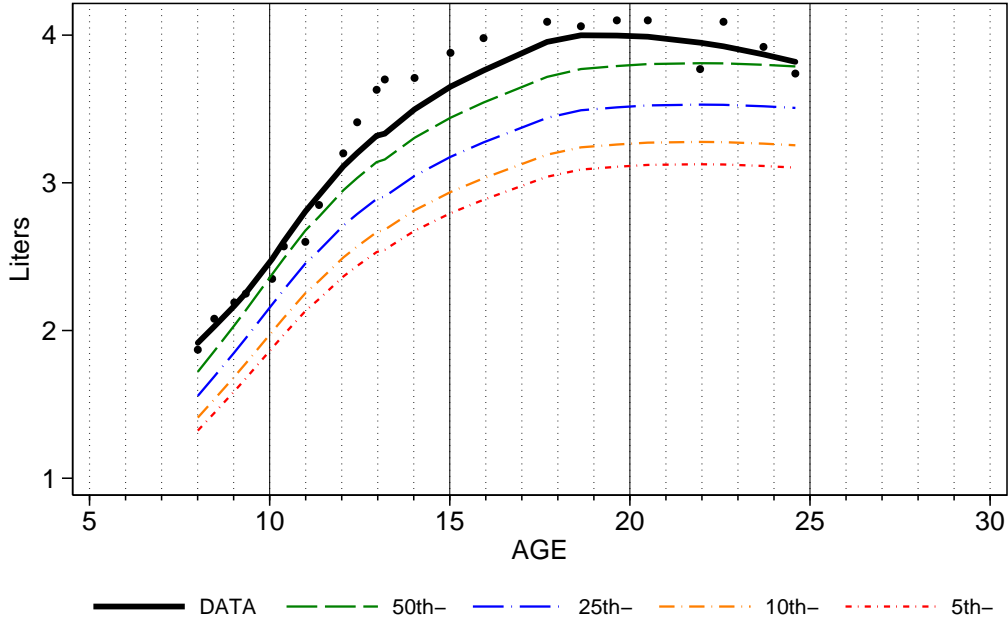

1768

**PATTERN OF GROWTH/DECLINE (Check One)**

- ( 1 ) Normal Growth
- ( 2 ) Normal Growth, Early Decline
- ( 3 ) Reduced Growth
- ( 4 ) Reduced Growth, Early Decline
- ( 9 ) Undetermined Pattern
- ( 8 ) Undetermined - not enough data

Maximum lung growth attained: ( 1 ) Yes ( 0 ) No

Plateau started: ( 2 ) No plateau ( 1 ) Yes ( 0 ) No

Decline started: ( 1 ) Yes ( 0 ) No

AGE AT each of the following periods (use '99' if N/A):

Maximum Lung Growth: \_\_\_\_ . \_\_\_\_

Start of Plateau: \_\_\_\_ . \_\_\_\_

Start of Decline: \_\_\_\_ . \_\_\_\_

### Pre-BD FEV1 Data and Percentiles: 1775

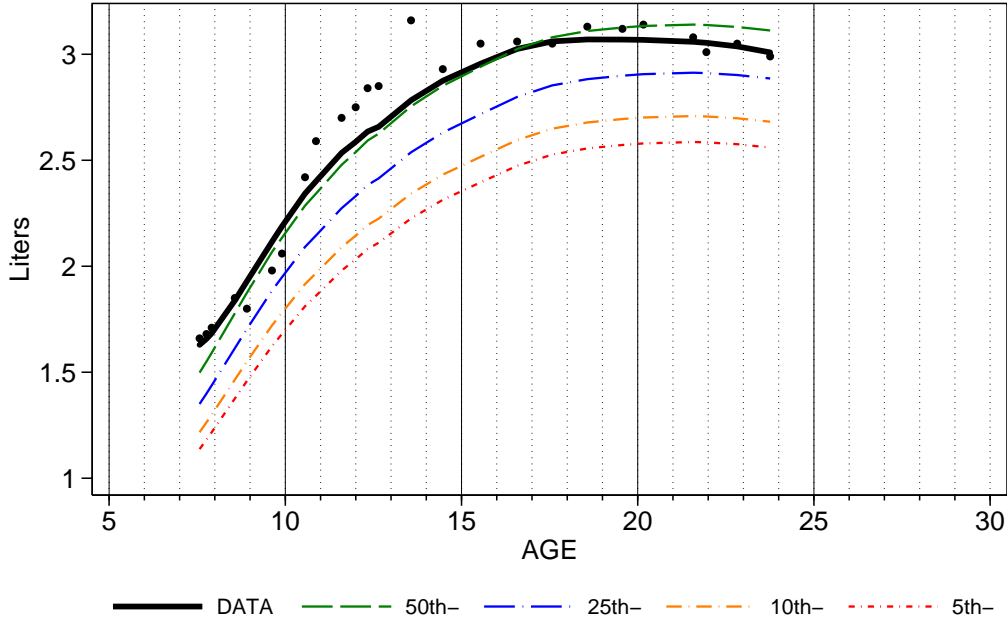

1775

**PATTERN OF GROWTH/DECLINE (Check One)**

- ( 1 ) Normal Growth
- ( 2 ) Normal Growth, Early Decline
- ( 3 ) Reduced Growth
- ( 4 ) Reduced Growth, Early Decline
- ( 9 ) Undetermined Pattern
- ( 8 ) Undetermined - not enough data

Maximum lung growth attained: ( 1 ) Yes ( 0 ) No

Plateau started: ( 2 ) No plateau ( 1 ) Yes ( 0 ) No

Decline started: ( 1 ) Yes ( 0 ) No

AGE AT each of the following periods (use '99' if N/A):

Maximum Lung Growth: \_\_\_\_ . \_\_\_\_

Start of Plateau: \_\_\_\_ . \_\_\_\_

Start of Decline: \_\_\_\_ . \_\_\_\_

### Pre-BD FEV1 Data and Percentiles: 1781

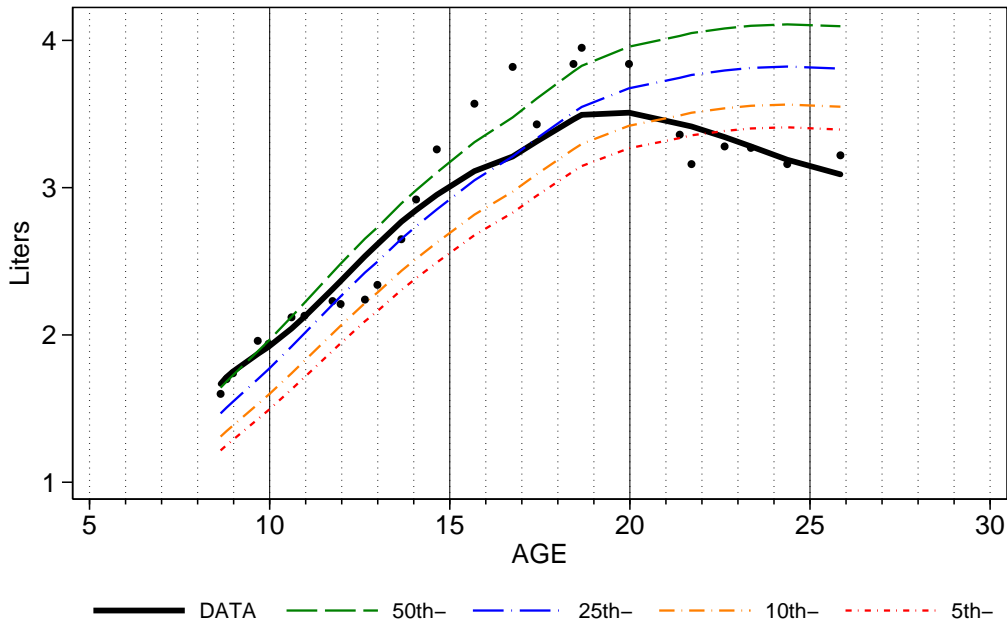

1781

**PATTERN OF GROWTH/DECLINE (Check One)**

- ( 1) Normal Growth
- ( 2) Normal Growth, Early Decline
- ( 3) Reduced Growth
- ( 4) Reduced Growth, Early Decline
- ( 9) Undetermined Pattern
- ( 8) Undetermined - not enough data

Maximum lung growth attained: ( 1) Yes ( 0) No

Plateau started: ( 2) No plateau ( 1) Yes ( 0) No

Decline started: ( 1) Yes ( 0) No

AGE AT each of the following periods (use '99' if N/A):

Maximum Lung Growth: \_\_\_\_ . \_\_\_\_

Start of Plateau: \_\_\_\_ . \_\_\_\_

Start of Decline: \_\_\_\_ . \_\_\_\_



### Pre-BD FEV1 Data and Percentiles: 1783

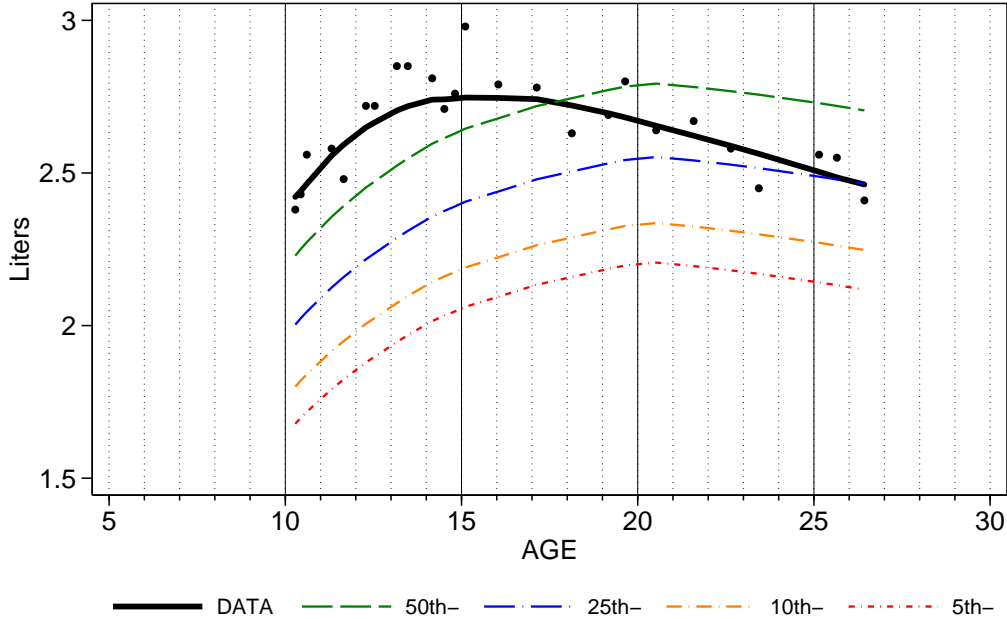

1783

**PATTERN OF GROWTH/DECLINE (Check One)**

- ( 1) Normal Growth
- ( 2) Normal Growth, Early Decline
- ( 3) Reduced Growth
- ( 4) Reduced Growth, Early Decline
- ( 9) Undetermined Pattern
- ( 8) Undetermined - not enough data

Maximum lung growth attained: ( 1) Yes ( 0) No

Plateau started: ( 2) No plateau ( 1) Yes ( 0) No

Decline started: ( 1) Yes ( 0) No

AGE AT each of the following periods (use '99' if N/A):

Maximum Lung Growth: \_\_\_\_ . \_\_\_\_

Start of Plateau: \_\_\_\_ . \_\_\_\_

Start of Decline: \_\_\_\_ . \_\_\_\_

### Pre-BD FEV1 Data and Percentiles: 1785

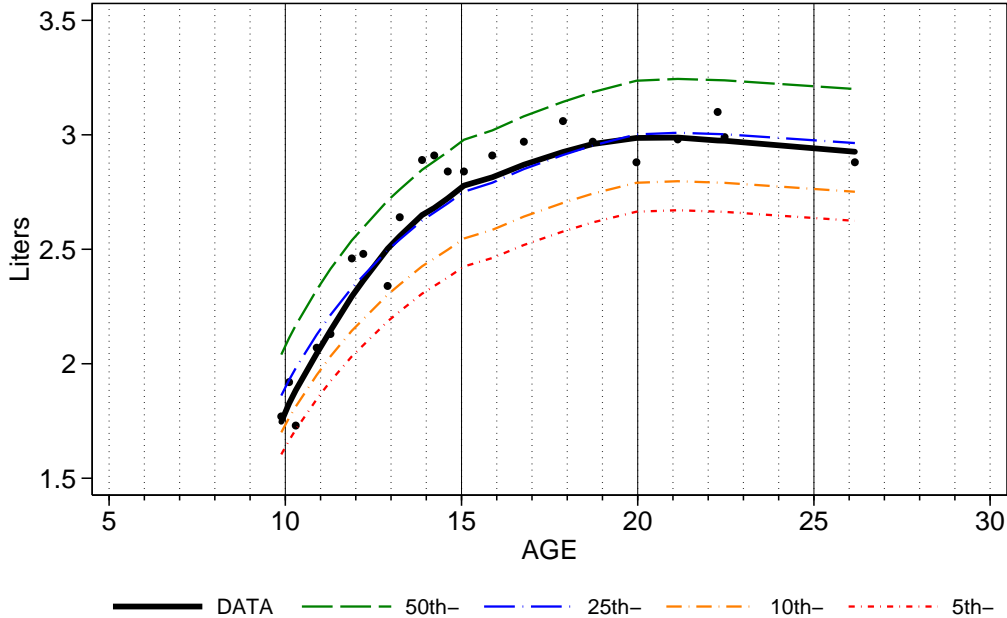

1785

**PATTERN OF GROWTH/DECLINE (Check One)**

- ( 1) Normal Growth
- ( 2) Normal Growth, Early Decline
- ( 3) Reduced Growth
- ( 4) Reduced Growth, Early Decline
- ( 9) Undetermined Pattern
- ( 8) Undetermined - not enough data

Maximum lung growth attained: ( 1) Yes ( 0) No

Plateau started: ( 2) No plateau ( 1) Yes ( 0) No

Decline started: ( 1) Yes ( 0) No

AGE AT each of the following periods (use '99' if N/A):

Maximum Lung Growth: \_\_\_\_ . \_\_\_\_

Start of Plateau: \_\_\_\_ . \_\_\_\_

Start of Decline: \_\_\_\_ . \_\_\_\_

### Pre-BD FEV1 Data and Percentiles: 1788

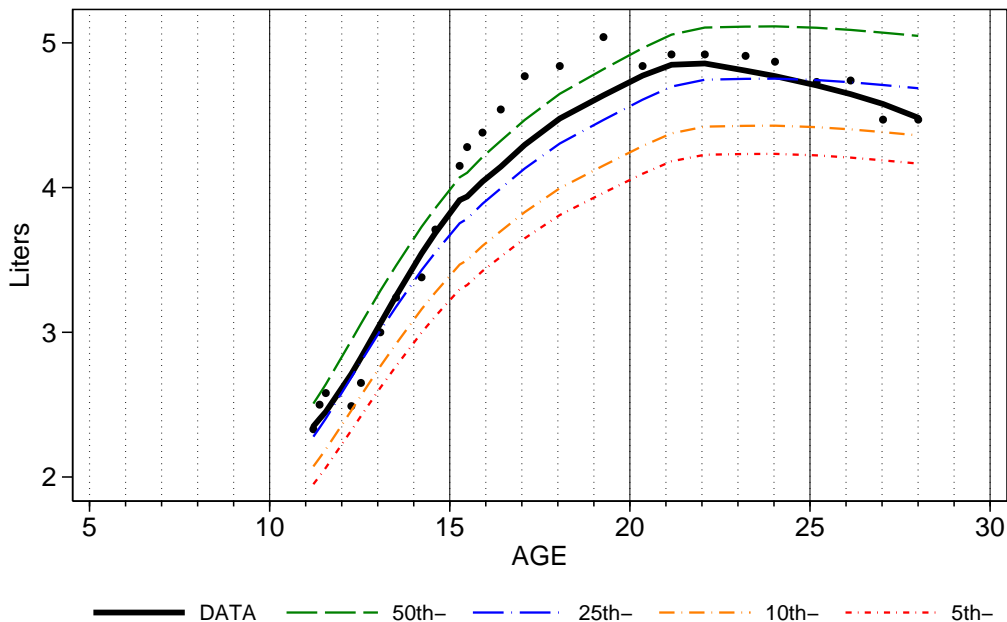

1788

**PATTERN OF GROWTH/DECLINE (Check One)**

- ( 1) Normal Growth
- ( 2) Normal Growth, Early Decline
- ( 3) Reduced Growth
- ( 4) Reduced Growth, Early Decline
- ( 9) Undetermined Pattern
- ( 8) Undetermined - not enough data

Maximum lung growth attained: ( 1) Yes ( 0) No

Plateau started: ( 2) No plateau ( 1) Yes ( 0) No

Decline started: ( 1) Yes ( 0) No

AGE AT each of the following periods (use '99' if N/A):

Maximum Lung Growth: \_\_\_\_ . \_\_\_\_

Start of Plateau: \_\_\_\_ . \_\_\_\_

Start of Decline: \_\_\_\_ . \_\_\_\_

### Pre-BD FEV1 Data and Percentiles: 1790

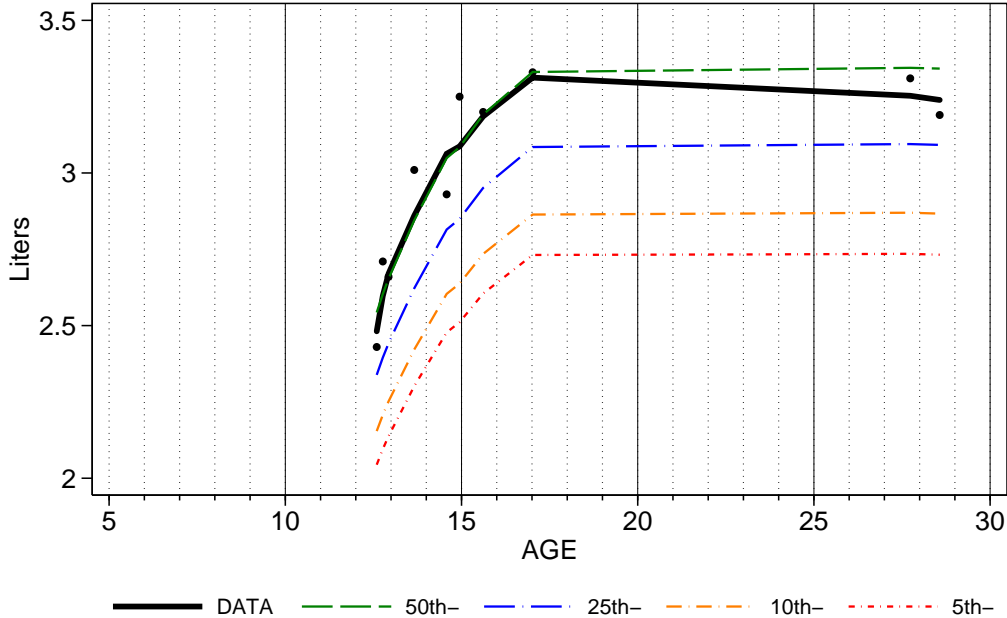

1790

**PATTERN OF GROWTH/DECLINE (Check One)**

- ( 1) Normal Growth
- ( 2) Normal Growth, Early Decline
- ( 3) Reduced Growth
- ( 4) Reduced Growth, Early Decline
- ( 9) Undetermined Pattern
- ( 8) Undetermined - not enough data

Maximum lung growth attained: ( 1) Yes ( 0) No

Plateau started: ( 2) No plateau ( 1) Yes ( 0) No

Decline started: ( 1) Yes ( 0) No

AGE AT each of the following periods (use '99' if N/A):

Maximum Lung Growth: \_\_\_\_ . \_\_\_\_

Start of Plateau: \_\_\_\_ . \_\_\_\_

Start of Decline: \_\_\_\_ . \_\_\_\_

### Pre-BD FEV1 Data and Percentiles: 1795

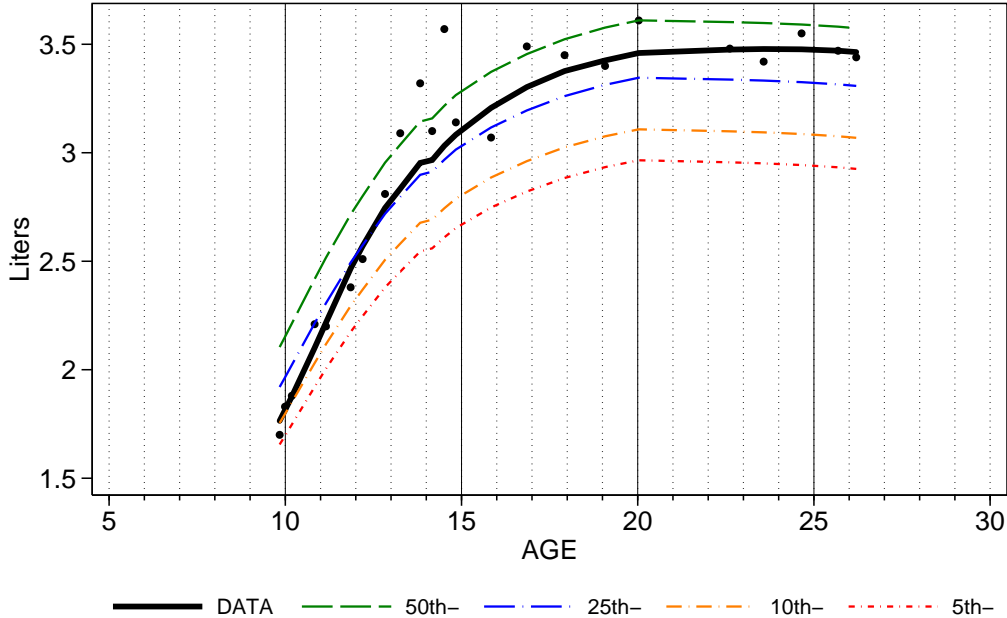

1795

**PATTERN OF GROWTH/DECLINE (Check One)**

- ( 1) Normal Growth
- ( 2) Normal Growth, Early Decline
- ( 3) Reduced Growth
- ( 4) Reduced Growth, Early Decline
- ( 9) Undetermined Pattern
- ( 8) Undetermined - not enough data

Maximum lung growth attained: ( 1) Yes ( 0) No

Plateau started: ( 2) No plateau ( 1) Yes ( 0) No

Decline started: ( 1) Yes ( 0) No

AGE AT each of the following periods (use '99' if N/A):

Maximum Lung Growth: \_\_\_\_ . \_\_\_\_

Start of Plateau: \_\_\_\_ . \_\_\_\_

Start of Decline: \_\_\_\_ . \_\_\_\_

### Pre-BD FEV1 Data and Percentiles: 1798

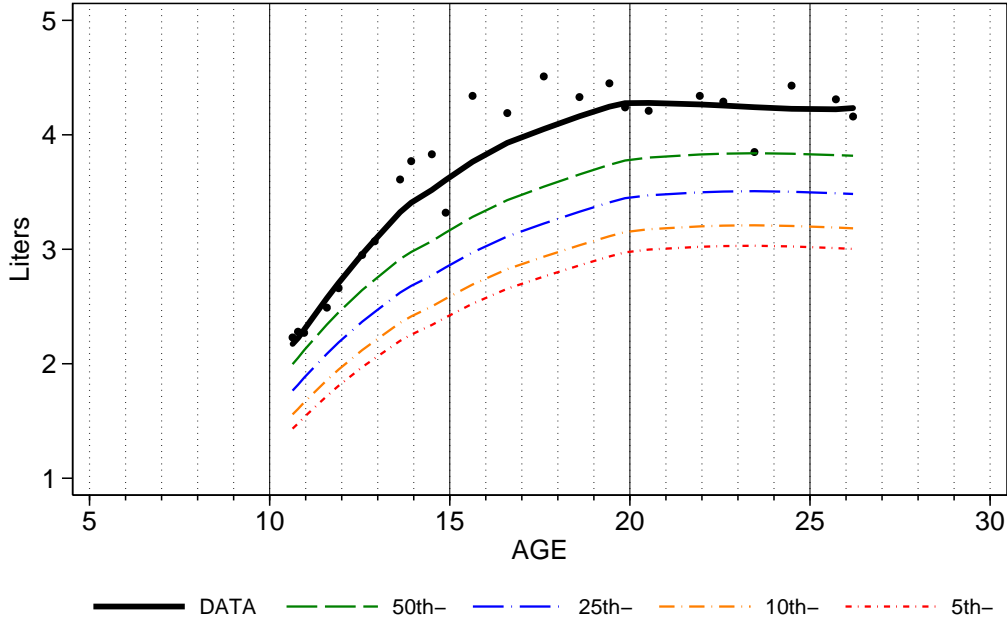

1798

**PATTERN OF GROWTH/DECLINE (Check One)**

- ( 1 ) Normal Growth
- ( 2 ) Normal Growth, Early Decline
- ( 3 ) Reduced Growth
- ( 4 ) Reduced Growth, Early Decline
- ( 9 ) Undetermined Pattern
- ( 8 ) Undetermined - not enough data

Maximum lung growth attained: ( 1 ) Yes ( 0 ) No

Plateau started: ( 2 ) No plateau ( 1 ) Yes ( 0 ) No

Decline started: ( 1 ) Yes ( 0 ) No

AGE AT each of the following periods (use '99' if N/A):

Maximum Lung Growth: \_\_\_\_ . \_\_\_\_

Start of Plateau: \_\_\_\_ . \_\_\_\_

Start of Decline: \_\_\_\_ . \_\_\_\_

### Pre-BD FEV1 Data and Percentiles: 1799

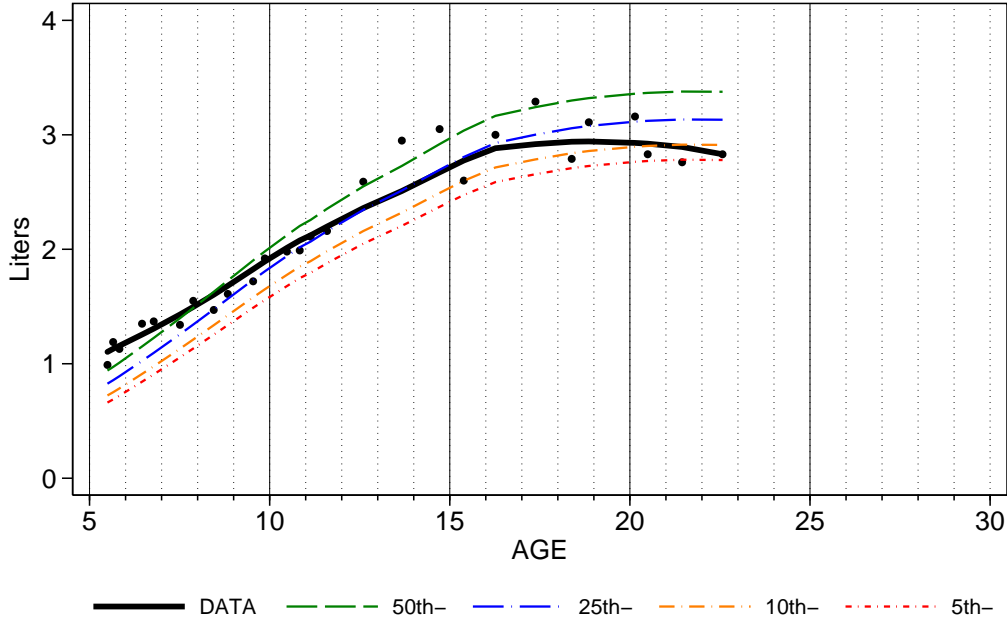

1799

**PATTERN OF GROWTH/DECLINE (Check One)**

- ( 1 ) Normal Growth
- ( 2 ) Normal Growth, Early Decline
- ( 3 ) Reduced Growth
- ( 4 ) Reduced Growth, Early Decline
- ( 9 ) Undetermined Pattern
- ( 8 ) Undetermined - not enough data

Maximum lung growth attained: ( 1 ) Yes ( 0 ) No

Plateau started: ( 2 ) No plateau ( 1 ) Yes ( 0 ) No

Decline started: ( 1 ) Yes ( 0 ) No

AGE AT each of the following periods (use '99' if N/A):

Maximum Lung Growth: \_\_\_\_ . \_\_\_\_

Start of Plateau: \_\_\_\_ . \_\_\_\_

Start of Decline: \_\_\_\_ . \_\_\_\_

### Pre-BD FEV1 Data and Percentiles: 1801

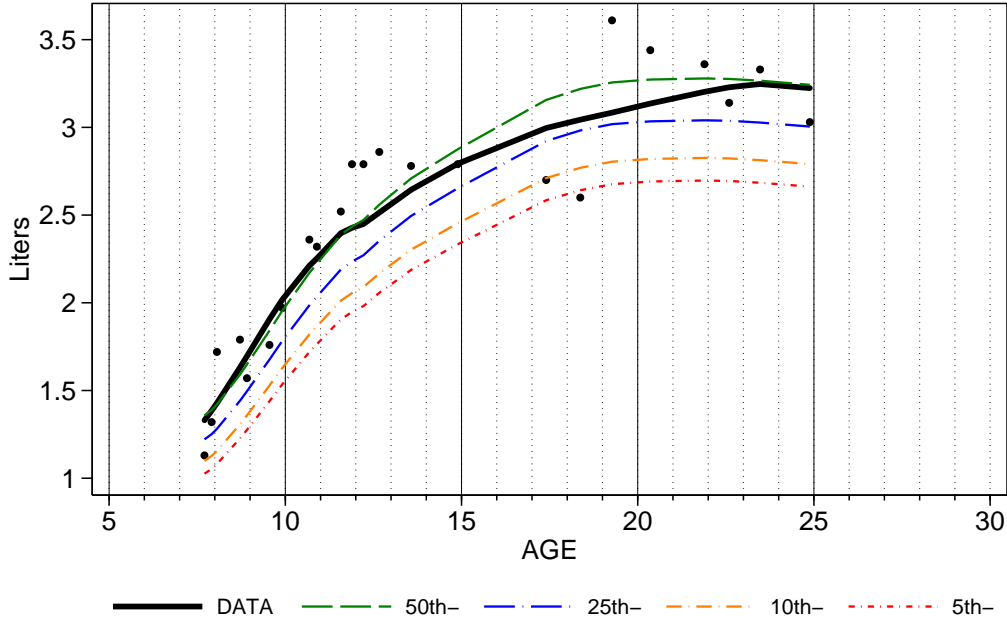

1801

**PATTERN OF GROWTH/DECLINE (Check One)**

- ( 1 ) Normal Growth
- ( 2 ) Normal Growth, Early Decline
- ( 3 ) Reduced Growth
- ( 4 ) Reduced Growth, Early Decline
- ( 9 ) Undetermined Pattern
- ( 8 ) Undetermined - not enough data

Maximum lung growth attained: ( 1 ) Yes ( 0 ) No

Plateau started: ( 2 ) No plateau ( 1 ) Yes ( 0 ) No

Decline started: ( 1 ) Yes ( 0 ) No

AGE AT each of the following periods (use '99' if N/A):

Maximum Lung Growth: \_\_\_\_ . \_\_\_\_

Start of Plateau: \_\_\_\_ . \_\_\_\_

Start of Decline: \_\_\_\_ . \_\_\_\_



### Pre-BD FEV1 Data and Percentiles: 1802

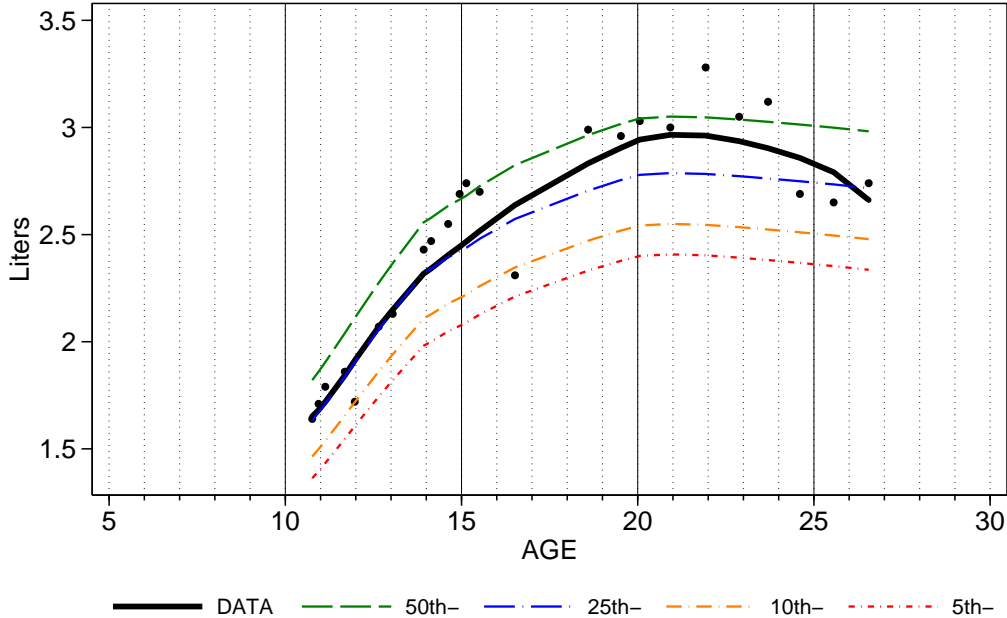

1802

**PATTERN OF GROWTH/DECLINE (Check One)**

- ( 1) Normal Growth
- ( 2) Normal Growth, Early Decline
- ( 3) Reduced Growth
- ( 4) Reduced Growth, Early Decline
- ( 9) Undetermined Pattern
- ( 8) Undetermined - not enough data

Maximum lung growth attained: ( 1) Yes ( 0) No

Plateau started: ( 2) No plateau ( 1) Yes ( 0) No

Decline started: ( 1) Yes ( 0) No

AGE AT each of the following periods (use '99' if N/A):

Maximum Lung Growth: \_\_\_\_ . \_\_\_\_

Start of Plateau: \_\_\_\_ . \_\_\_\_

Start of Decline: \_\_\_\_ . \_\_\_\_

### Pre-BD FEV1 Data and Percentiles: 1843

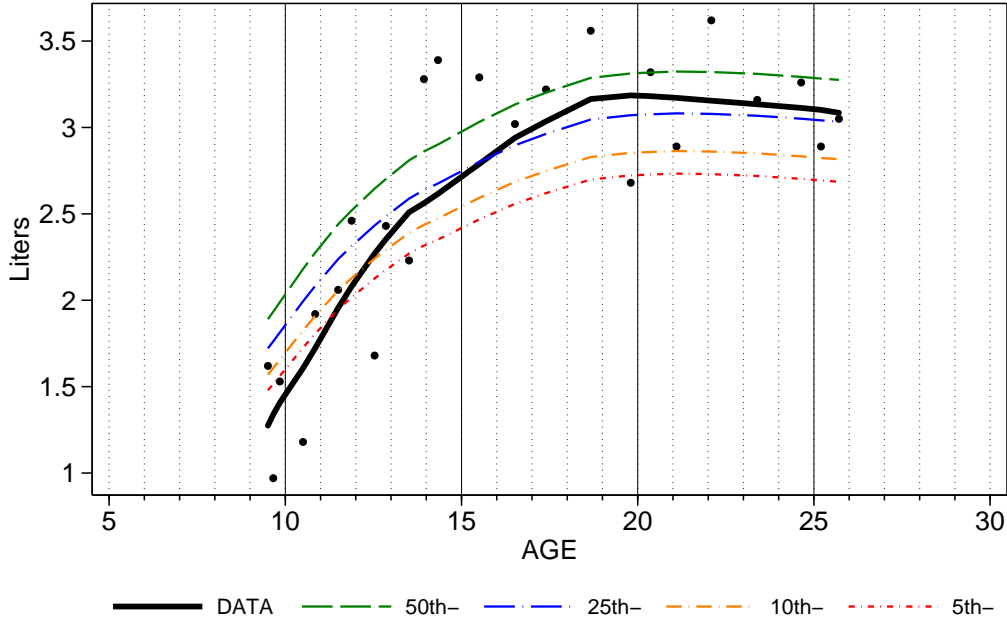

1843

**PATTERN OF GROWTH/DECLINE (Check One)**

- ( 1) Normal Growth
- ( 2) Normal Growth, Early Decline
- ( 3) Reduced Growth
- ( 4) Reduced Growth, Early Decline
- ( 9) Undetermined Pattern
- ( 8) Undetermined - not enough data

Maximum lung growth attained: ( 1) Yes ( 0) No

Plateau started: ( 2) No plateau ( 1) Yes ( 0) No

Decline started: ( 1) Yes ( 0) No

AGE AT each of the following periods (use '99' if N/A):

Maximum Lung Growth: \_\_\_\_ . \_\_\_\_

Start of Plateau: \_\_\_\_ . \_\_\_\_

Start of Decline: \_\_\_\_ . \_\_\_\_

### Pre-BD FEV1 Data and Percentiles: 1845

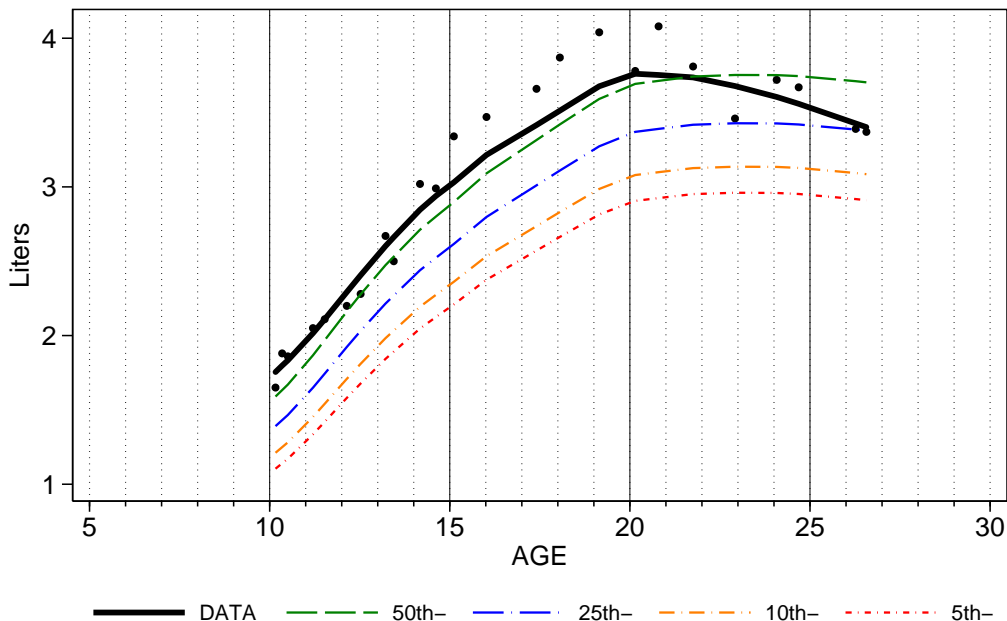

1845

**PATTERN OF GROWTH/DECLINE (Check One)**

- ( 1 ) Normal Growth
- ( 2 ) Normal Growth, Early Decline
- ( 3 ) Reduced Growth
- ( 4 ) Reduced Growth, Early Decline
- ( 9 ) Undetermined Pattern
- ( 8 ) Undetermined - not enough data

Maximum lung growth attained: ( 1 ) Yes ( 0 ) No

Plateau started: ( 2 ) No plateau ( 1 ) Yes ( 0 ) No

Decline started: ( 1 ) Yes ( 0 ) No

AGE AT each of the following periods (use '99' if N/A):

Maximum Lung Growth: \_\_\_\_ . \_\_\_\_

Start of Plateau: \_\_\_\_ . \_\_\_\_

Start of Decline: \_\_\_\_ . \_\_\_\_

### Pre-BD FEV1 Data and Percentiles: 1848

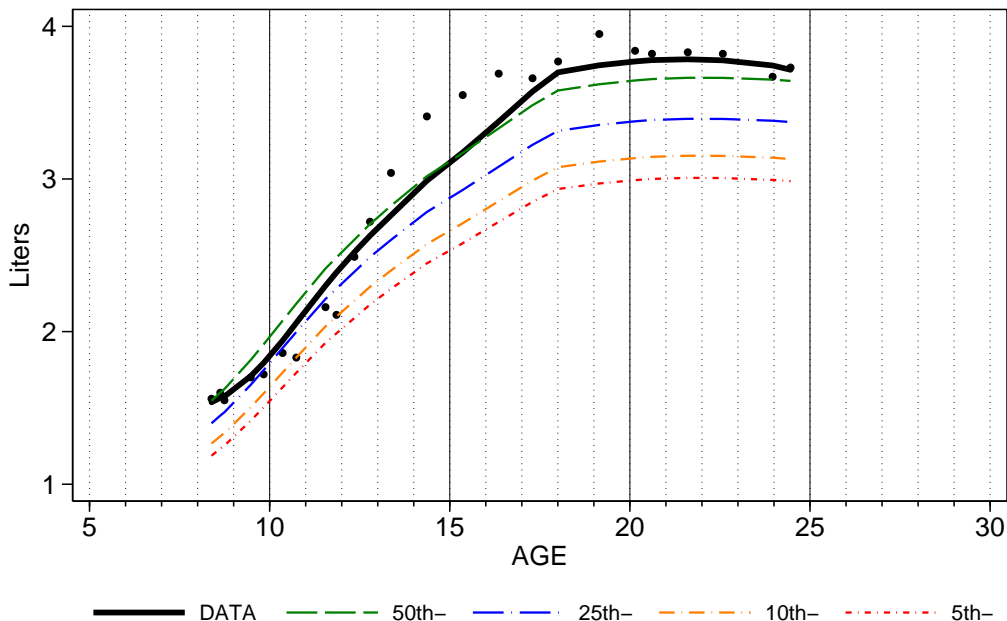

1848

**PATTERN OF GROWTH/DECLINE (Check One)**

- ( 1 ) Normal Growth
- ( 2 ) Normal Growth, Early Decline
- ( 3 ) Reduced Growth
- ( 4 ) Reduced Growth, Early Decline
- ( 9 ) Undetermined Pattern
- ( 8 ) Undetermined - not enough data

Maximum lung growth attained: ( 1 ) Yes ( 0 ) No

Plateau started: ( 2 ) No plateau ( 1 ) Yes ( 0 ) No

Decline started: ( 1 ) Yes ( 0 ) No

AGE AT each of the following periods (use '99' if N/A):

Maximum Lung Growth: \_\_\_\_ . \_\_\_\_

Start of Plateau: \_\_\_\_ . \_\_\_\_

Start of Decline: \_\_\_\_ . \_\_\_\_

### Pre-BD FEV1 Data and Percentiles: 1858

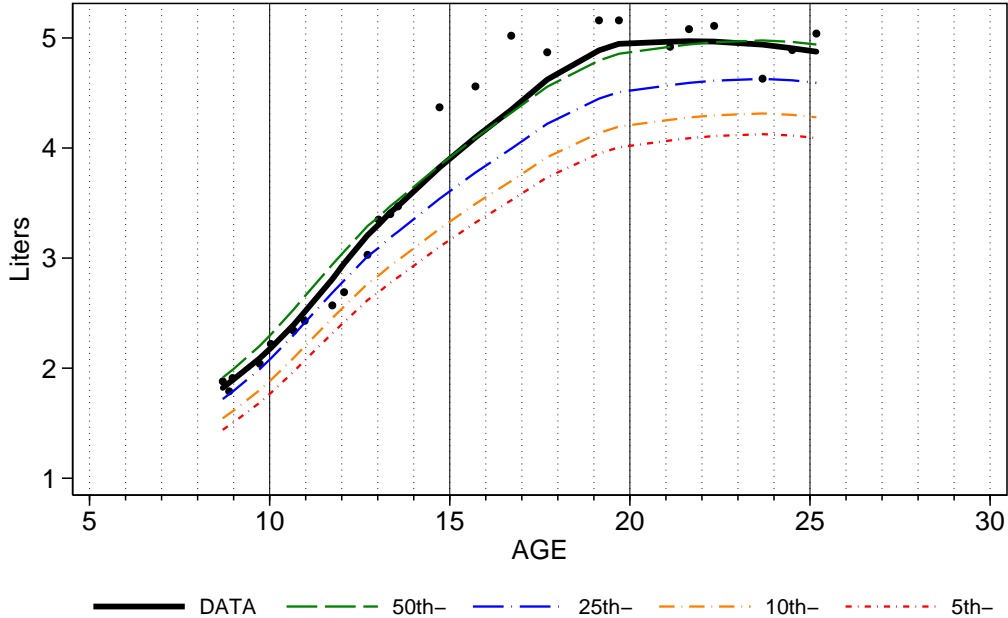

1858

**PATTERN OF GROWTH/DECLINE (Check One)**

- ( 1 ) Normal Growth
- ( 2 ) Normal Growth, Early Decline
- ( 3 ) Reduced Growth
- ( 4 ) Reduced Growth, Early Decline
- ( 9 ) Undetermined Pattern
- ( 8 ) Undetermined - not enough data

Maximum lung growth attained: ( 1 ) Yes ( 0 ) No

Plateau started: ( 2 ) No plateau ( 1 ) Yes ( 0 ) No

Decline started: ( 1 ) Yes ( 0 ) No

AGE AT each of the following periods (use '99' if N/A):

Maximum Lung Growth: \_\_\_\_ . \_\_\_\_

Start of Plateau: \_\_\_\_ . \_\_\_\_

Start of Decline: \_\_\_\_ . \_\_\_\_

### Pre-BD FEV1 Data and Percentiles: 1865

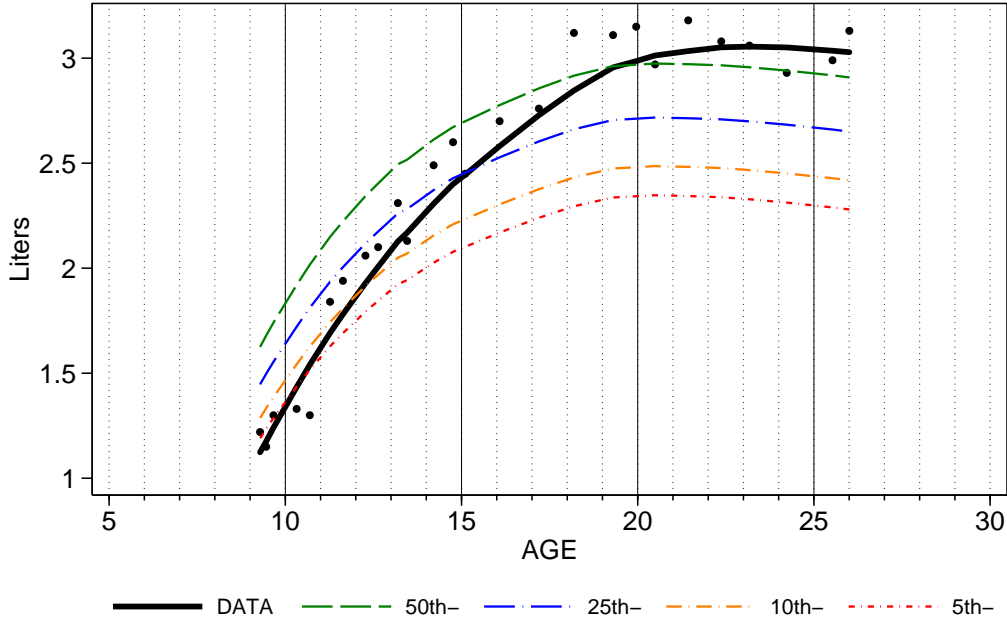

1865

**PATTERN OF GROWTH/DECLINE (Check One)**

- ( 1 ) Normal Growth
- ( 2 ) Normal Growth, Early Decline
- ( 3 ) Reduced Growth
- ( 4 ) Reduced Growth, Early Decline
- ( 9 ) Undetermined Pattern
- ( 8 ) Undetermined - not enough data

Maximum lung growth attained: ( 1 ) Yes ( 0 ) No

Plateau started: ( 2 ) No plateau ( 1 ) Yes ( 0 ) No

Decline started: ( 1 ) Yes ( 0 ) No

AGE AT each of the following periods (use '99' if N/A):

Maximum Lung Growth: \_\_\_\_ . \_\_\_\_

Start of Plateau: \_\_\_\_ . \_\_\_\_

Start of Decline: \_\_\_\_ . \_\_\_\_

### Pre-BD FEV1 Data and Percentiles: 1870

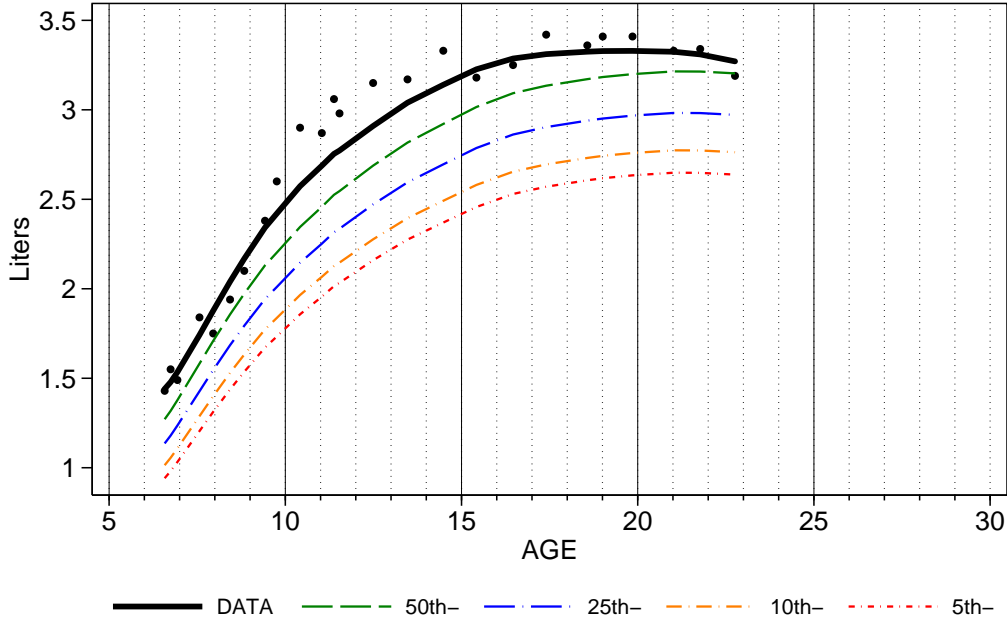

1870

**PATTERN OF GROWTH/DECLINE (Check One)**

- ( 1) Normal Growth
- ( 2) Normal Growth, Early Decline
- ( 3) Reduced Growth
- ( 4) Reduced Growth, Early Decline
- ( 9) Undetermined Pattern
- ( 8) Undetermined - not enough data

Maximum lung growth attained: ( 1) Yes ( 0) No

Plateau started: ( 2) No plateau ( 1) Yes ( 0) No

Decline started: ( 1) Yes ( 0) No

AGE AT each of the following periods (use '99' if N/A):

Maximum Lung Growth: \_\_\_\_ . \_\_\_\_

Start of Plateau: \_\_\_\_ . \_\_\_\_

Start of Decline: \_\_\_\_ . \_\_\_\_

### Pre-BD FEV1 Data and Percentiles: 1871

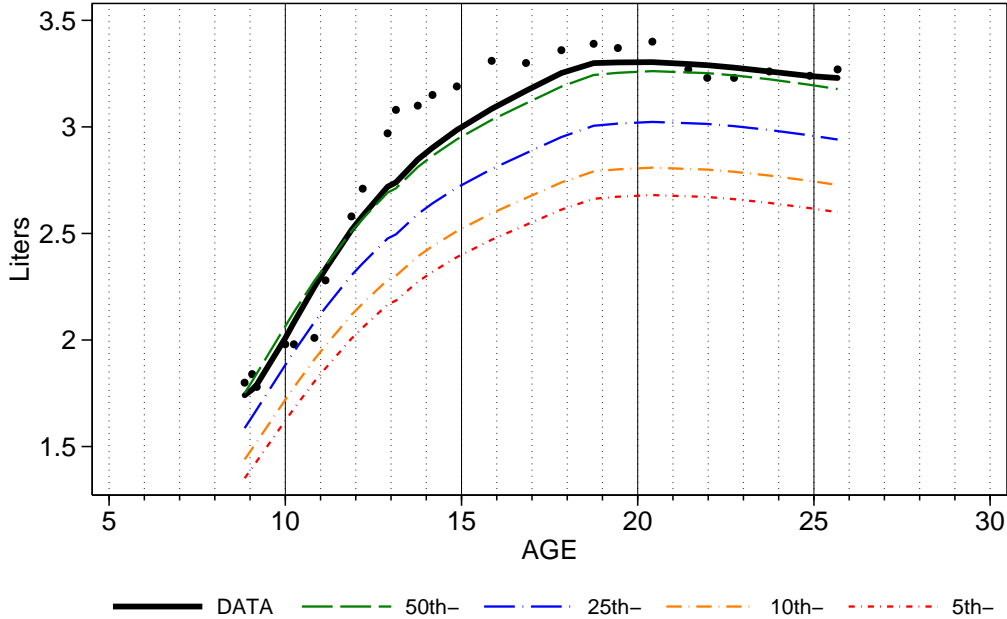

1871

**PATTERN OF GROWTH/DECLINE (Check One)**

- ( 1 ) Normal Growth
- ( 2 ) Normal Growth, Early Decline
- ( 3 ) Reduced Growth
- ( 4 ) Reduced Growth, Early Decline
- ( 9 ) Undetermined Pattern
- ( 8 ) Undetermined - not enough data

Maximum lung growth attained: ( 1 ) Yes ( 0 ) No

Plateau started: ( 2 ) No plateau ( 1 ) Yes ( 0 ) No

Decline started: ( 1 ) Yes ( 0 ) No

AGE AT each of the following periods (use '99' if N/A):

Maximum Lung Growth: \_\_\_\_ . \_\_\_\_

Start of Plateau: \_\_\_\_ . \_\_\_\_

Start of Decline: \_\_\_\_ . \_\_\_\_



### Pre-BD FEV1 Data and Percentiles: 1873

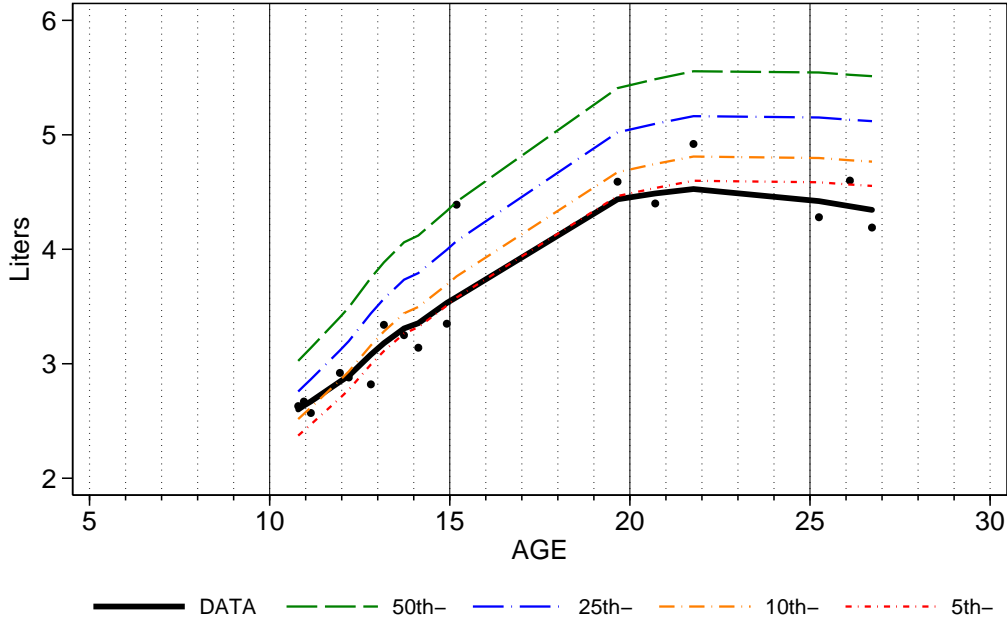

1873

**PATTERN OF GROWTH/DECLINE (Check One)**

- ( 1) Normal Growth
- ( 2) Normal Growth, Early Decline
- ( 3) Reduced Growth
- ( 4) Reduced Growth, Early Decline
- ( 9) Undetermined Pattern
- ( 8) Undetermined - not enough data

Maximum lung growth attained: ( 1) Yes ( 0) No

Plateau started: ( 2) No plateau ( 1) Yes ( 0) No

Decline started: ( 1) Yes ( 0) No

AGE AT each of the following periods (use '99' if N/A):

Maximum Lung Growth: \_\_\_\_ . \_\_\_\_

Start of Plateau: \_\_\_\_ . \_\_\_\_

Start of Decline: \_\_\_\_ . \_\_\_\_

### Pre-BD FEV1 Data and Percentiles: 1878

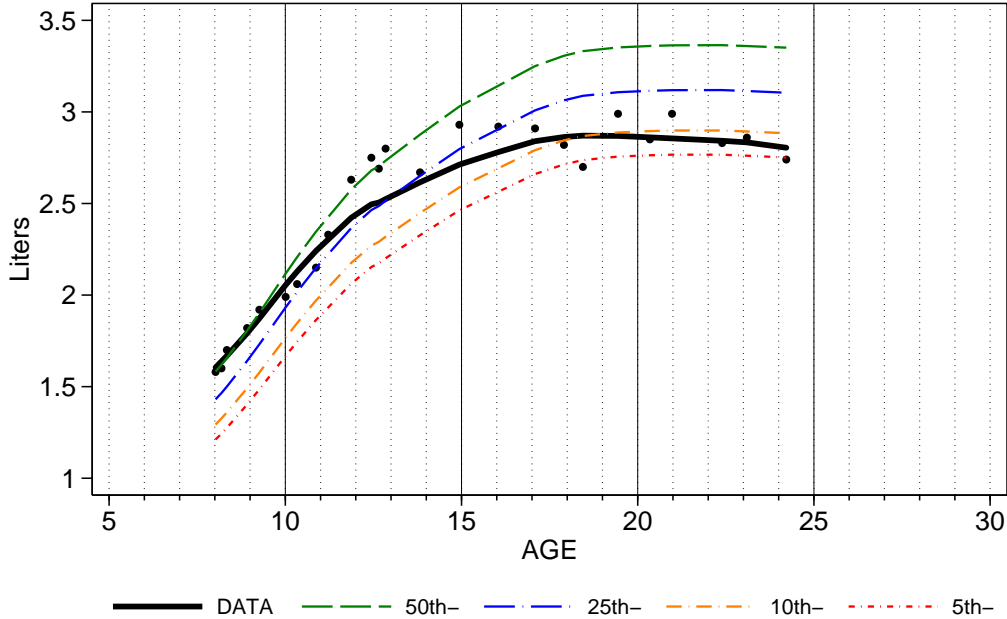

1878

**PATTERN OF GROWTH/DECLINE (Check One)**

- ( 1 ) Normal Growth
- ( 2 ) Normal Growth, Early Decline
- ( 3 ) Reduced Growth
- ( 4 ) Reduced Growth, Early Decline
- ( 9 ) Undetermined Pattern
- ( 8 ) Undetermined - not enough data

Maximum lung growth attained: ( 1 ) Yes ( 0 ) No

Plateau started: ( 2 ) No plateau ( 1 ) Yes ( 0 ) No

Decline started: ( 1 ) Yes ( 0 ) No

AGE AT each of the following periods (use '99' if N/A):

Maximum Lung Growth: \_\_\_\_ . \_\_\_\_

Start of Plateau: \_\_\_\_ . \_\_\_\_

Start of Decline: \_\_\_\_ . \_\_\_\_

### Pre-BD FEV1 Data and Percentiles: 1884

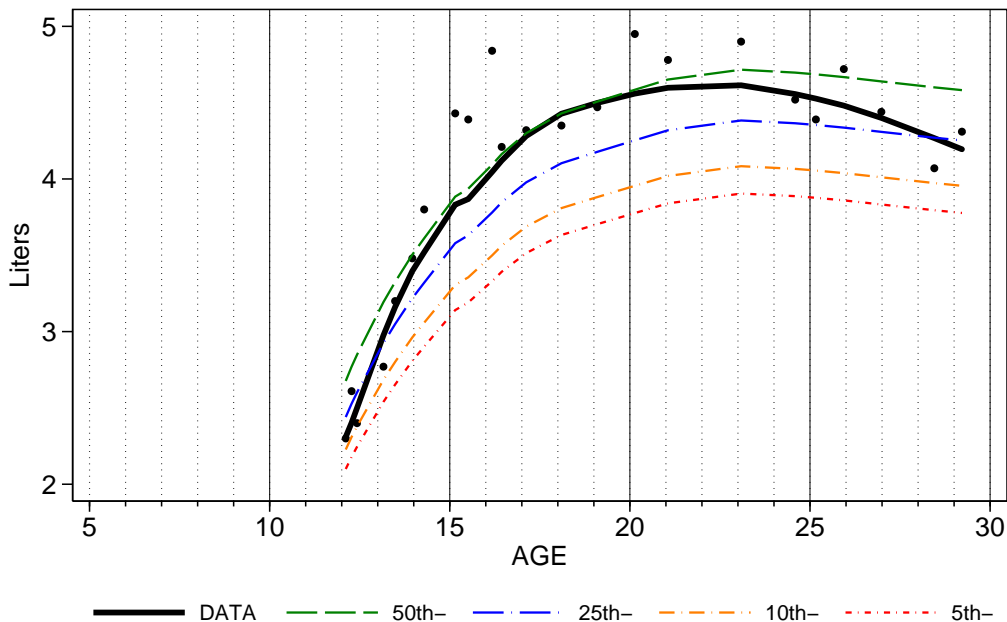

1884

**PATTERN OF GROWTH/DECLINE (Check One)**

- ( 1 ) Normal Growth
- ( 2 ) Normal Growth, Early Decline
- ( 3 ) Reduced Growth
- ( 4 ) Reduced Growth, Early Decline
- ( 9 ) Undetermined Pattern
- ( 8 ) Undetermined - not enough data

Maximum lung growth attained: ( 1 ) Yes ( 0 ) No

Plateau started: ( 2 ) No plateau ( 1 ) Yes ( 0 ) No

Decline started: ( 1 ) Yes ( 0 ) No

AGE AT each of the following periods (use '99' if N/A):

Maximum Lung Growth: \_\_\_\_ . \_\_\_\_

Start of Plateau: \_\_\_\_ . \_\_\_\_

Start of Decline: \_\_\_\_ . \_\_\_\_

### Pre-BD FEV1 Data and Percentiles: 1885

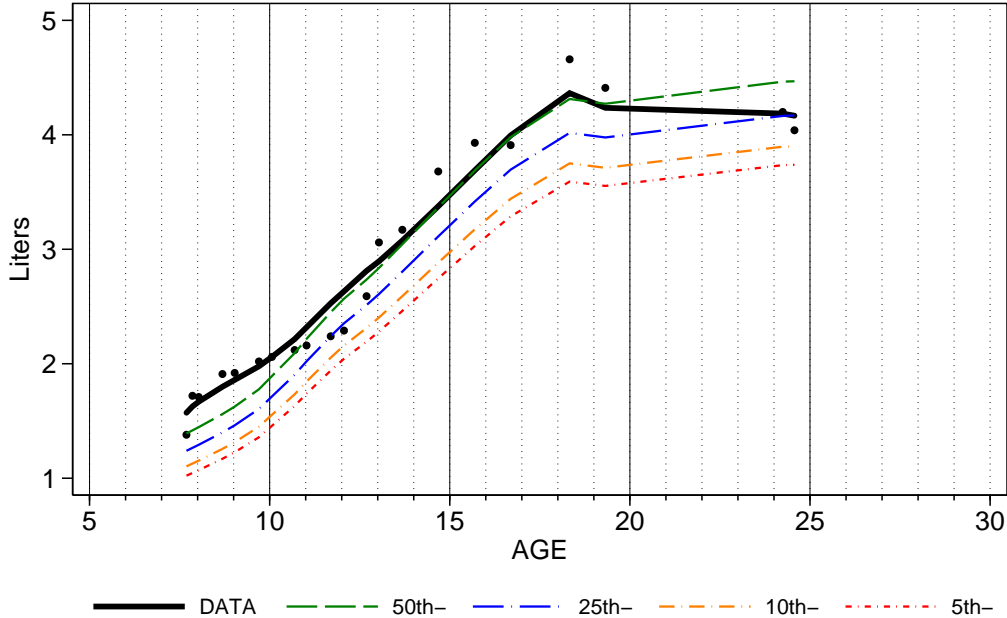

1885

**PATTERN OF GROWTH/DECLINE (Check One)**

- ( 1 ) Normal Growth
- ( 2 ) Normal Growth, Early Decline
- ( 3 ) Reduced Growth
- ( 4 ) Reduced Growth, Early Decline
- ( 9 ) Undetermined Pattern
- ( 8 ) Undetermined - not enough data

Maximum lung growth attained: ( 1 ) Yes ( 0 ) No

Plateau started: ( 2 ) No plateau ( 1 ) Yes ( 0 ) No

Decline started: ( 1 ) Yes ( 0 ) No

AGE AT each of the following periods (use '99' if N/A):

Maximum Lung Growth: \_\_\_\_ . \_\_\_\_

Start of Plateau: \_\_\_\_ . \_\_\_\_

Start of Decline: \_\_\_\_ . \_\_\_\_

### Pre-BD FEV1 Data and Percentiles: 1886

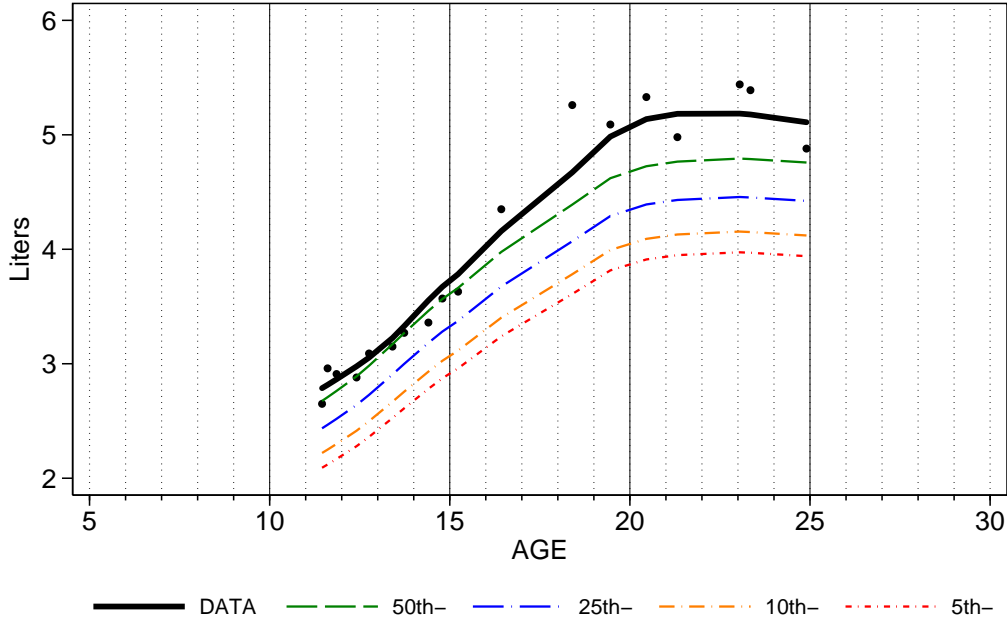

1886

**PATTERN OF GROWTH/DECLINE (Check One)**

- ( 1) Normal Growth
- ( 2) Normal Growth, Early Decline
- ( 3) Reduced Growth
- ( 4) Reduced Growth, Early Decline
- ( 9) Undetermined Pattern
- ( 8) Undetermined - not enough data

Maximum lung growth attained: ( 1) Yes ( 0) No

Plateau started: ( 2) No plateau ( 1) Yes ( 0) No

Decline started: ( 1) Yes ( 0) No

AGE AT each of the following periods (use '99' if N/A):

Maximum Lung Growth: \_\_\_\_ . \_\_\_\_

Start of Plateau: \_\_\_\_ . \_\_\_\_

Start of Decline: \_\_\_\_ . \_\_\_\_

### Pre-BD FEV1 Data and Percentiles: 1892

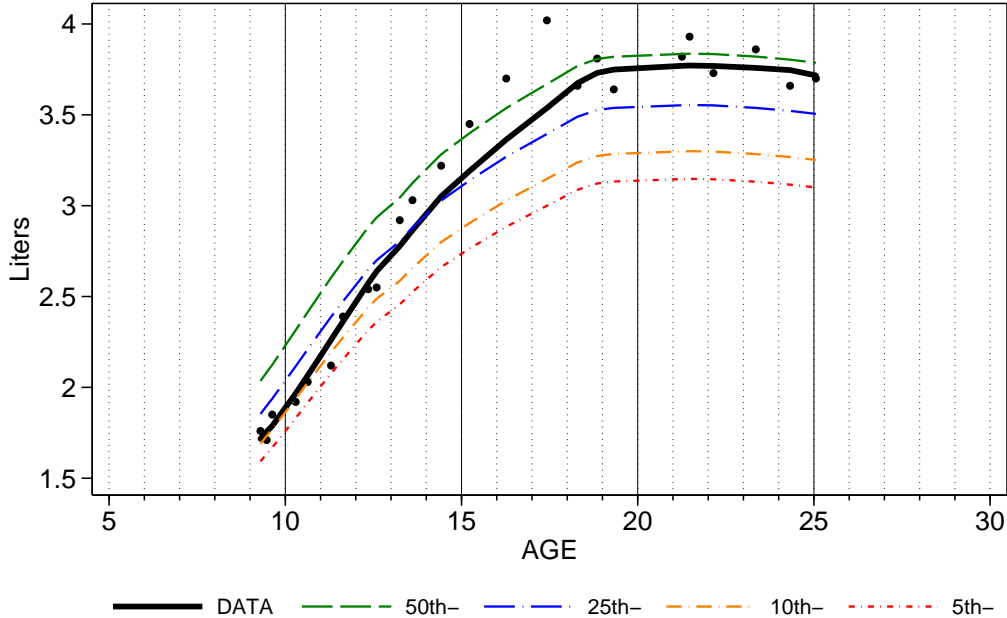

1892

**PATTERN OF GROWTH/DECLINE (Check One)**

- ( 1) Normal Growth
- ( 2) Normal Growth, Early Decline
- ( 3) Reduced Growth
- ( 4) Reduced Growth, Early Decline
- ( 9) Undetermined Pattern
- ( 8) Undetermined - not enough data

Maximum lung growth attained: ( 1) Yes ( 0) No

Plateau started: ( 2) No plateau ( 1) Yes ( 0) No

Decline started: ( 1) Yes ( 0) No

AGE AT each of the following periods (use '99' if N/A):

Maximum Lung Growth: \_\_\_\_ . \_\_\_\_

Start of Plateau: \_\_\_\_ . \_\_\_\_

Start of Decline: \_\_\_\_ . \_\_\_\_

### Pre-BD FEV1 Data and Percentiles: 1896

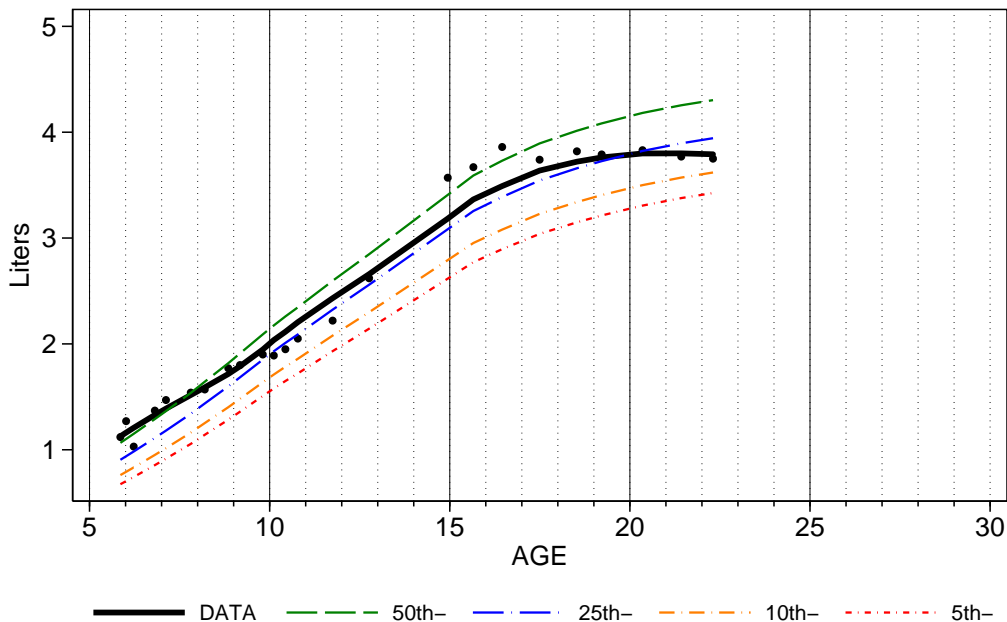

1896

**PATTERN OF GROWTH/DECLINE (Check One)**

- ( 1 ) Normal Growth
- ( 2 ) Normal Growth, Early Decline
- ( 3 ) Reduced Growth
- ( 4 ) Reduced Growth, Early Decline
- ( 9 ) Undetermined Pattern
- ( 8 ) Undetermined - not enough data

Maximum lung growth attained: ( 1 ) Yes ( 0 ) No

Plateau started: ( 2 ) No plateau ( 1 ) Yes ( 0 ) No

Decline started: ( 1 ) Yes ( 0 ) No

AGE AT each of the following periods (use '99' if N/A):

Maximum Lung Growth: \_\_\_\_ . \_\_\_\_

Start of Plateau: \_\_\_\_ . \_\_\_\_

Start of Decline: \_\_\_\_ . \_\_\_\_

### Pre-BD FEV1 Data and Percentiles: 1901

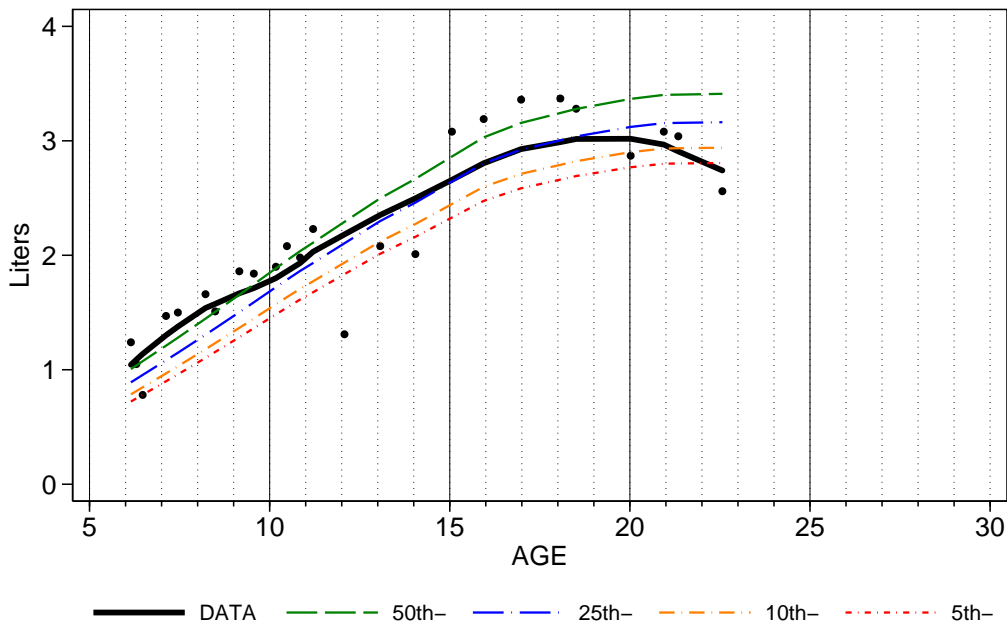

1901

**PATTERN OF GROWTH/DECLINE (Check One)**

- ( 1) Normal Growth
- ( 2) Normal Growth, Early Decline
- ( 3) Reduced Growth
- ( 4) Reduced Growth, Early Decline
- ( 9) Undetermined Pattern
- ( 8) Undetermined - not enough data

Maximum lung growth attained: ( 1) Yes ( 0) No

Plateau started: ( 2) No plateau ( 1) Yes ( 0) No

Decline started: ( 1) Yes ( 0) No

AGE AT each of the following periods (use '99' if N/A):

Maximum Lung Growth: \_\_\_\_ . \_\_\_\_

Start of Plateau: \_\_\_\_ . \_\_\_\_

Start of Decline: \_\_\_\_ . \_\_\_\_



### Pre-BD FEV1 Data and Percentiles: 1905

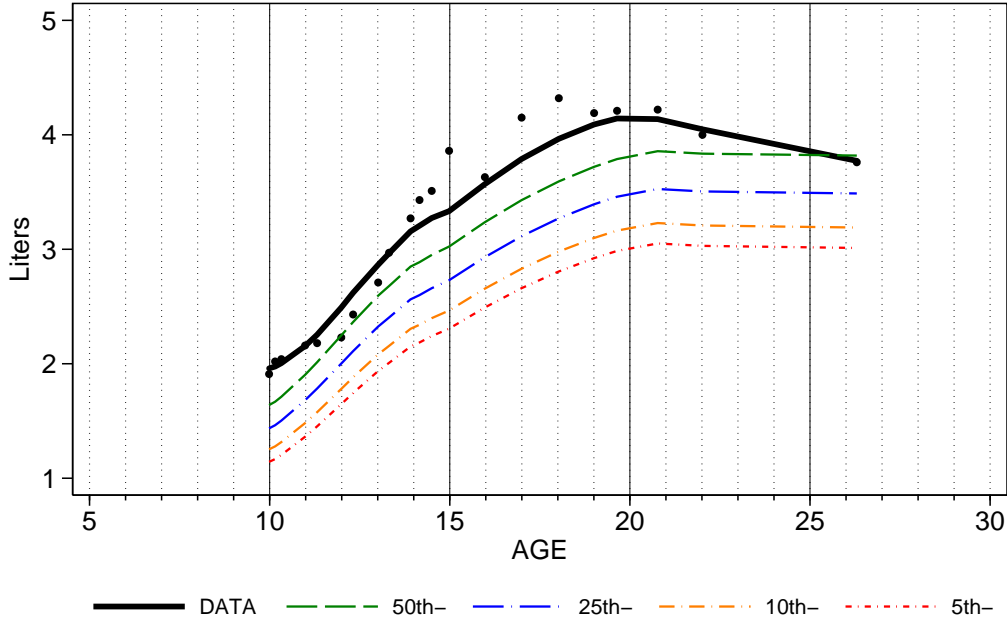

1905

**PATTERN OF GROWTH/DECLINE (Check One)**

- ( 1 ) Normal Growth
- ( 2 ) Normal Growth, Early Decline
- ( 3 ) Reduced Growth
- ( 4 ) Reduced Growth, Early Decline
- ( 9 ) Undetermined Pattern
- ( 8 ) Undetermined - not enough data

Maximum lung growth attained: ( 1 ) Yes ( 0 ) No

Plateau started: ( 2 ) No plateau ( 1 ) Yes ( 0 ) No

Decline started: ( 1 ) Yes ( 0 ) No

AGE AT each of the following periods (use '99' if N/A):

Maximum Lung Growth: \_\_\_\_ . \_\_\_\_

Start of Plateau: \_\_\_\_ . \_\_\_\_

Start of Decline: \_\_\_\_ . \_\_\_\_

### Pre-BD FEV1 Data and Percentiles: 1907

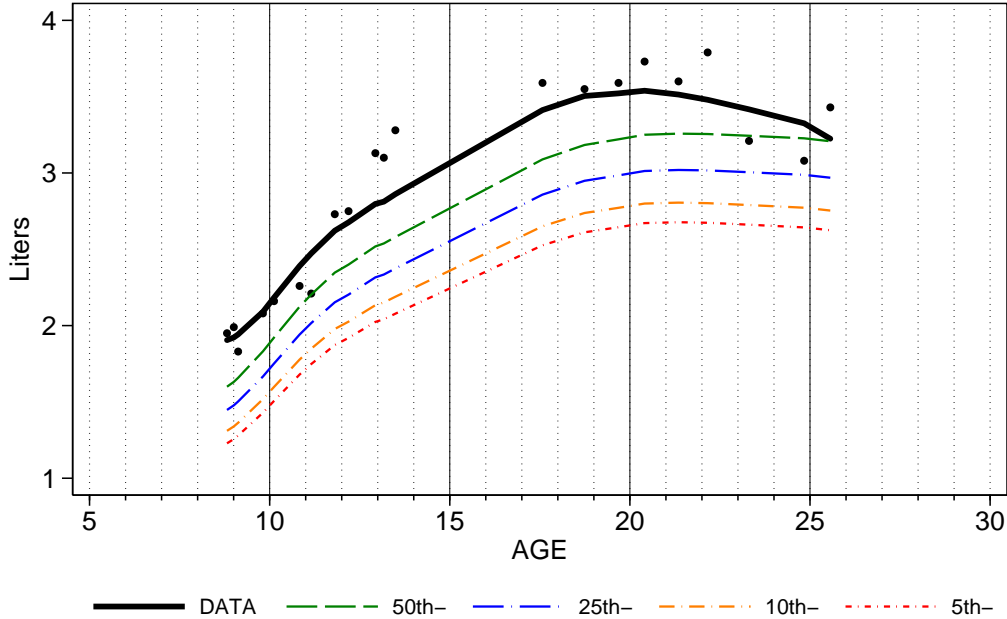

1907

**PATTERN OF GROWTH/DECLINE (Check One)**

- ( 1 ) Normal Growth
- ( 2 ) Normal Growth, Early Decline
- ( 3 ) Reduced Growth
- ( 4 ) Reduced Growth, Early Decline
- ( 9 ) Undetermined Pattern
- ( 8 ) Undetermined - not enough data

Maximum lung growth attained: ( 1 ) Yes ( 0 ) No

Plateau started: ( 2 ) No plateau ( 1 ) Yes ( 0 ) No

Decline started: ( 1 ) Yes ( 0 ) No

AGE AT each of the following periods (use '99' if N/A):

Maximum Lung Growth: \_\_\_\_ . \_\_\_\_

Start of Plateau: \_\_\_\_ . \_\_\_\_

Start of Decline: \_\_\_\_ . \_\_\_\_

### Pre-BD FEV1 Data and Percentiles: 1911

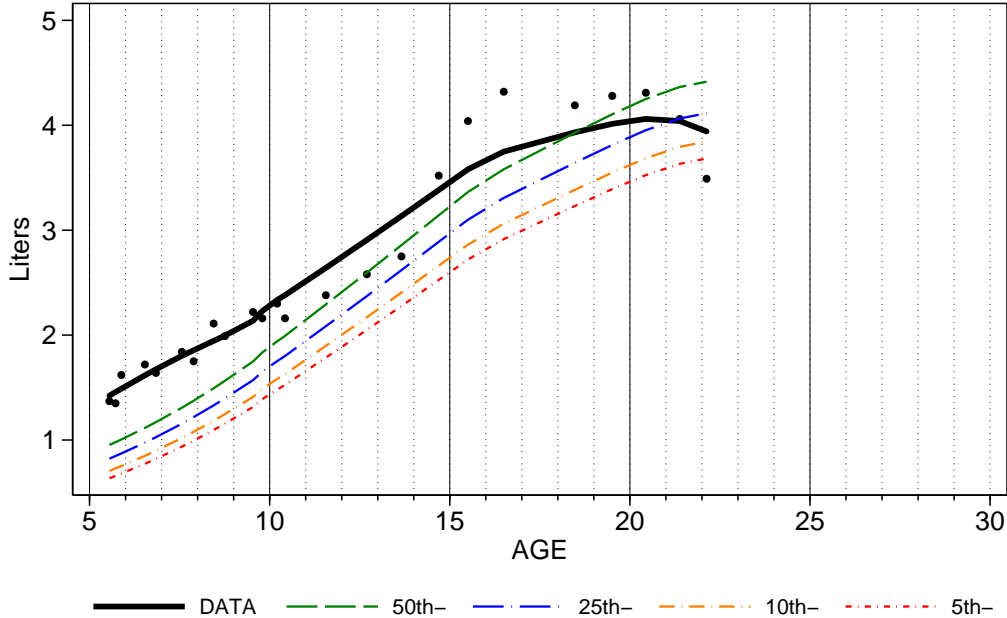

1911

**PATTERN OF GROWTH/DECLINE (Check One)**

- ( 1) Normal Growth
- ( 2) Normal Growth, Early Decline
- ( 3) Reduced Growth
- ( 4) Reduced Growth, Early Decline
- ( 9) Undetermined Pattern
- ( 8) Undetermined - not enough data

Maximum lung growth attained: ( 1) Yes ( 0) No

Plateau started: ( 2) No plateau ( 1) Yes ( 0) No

Decline started: ( 1) Yes ( 0) No

AGE AT each of the following periods (use '99' if N/A):

Maximum Lung Growth: \_\_\_\_ . \_\_\_\_

Start of Plateau: \_\_\_\_ . \_\_\_\_

Start of Decline: \_\_\_\_ . \_\_\_\_

### Pre-BD FEV1 Data and Percentiles: 1916

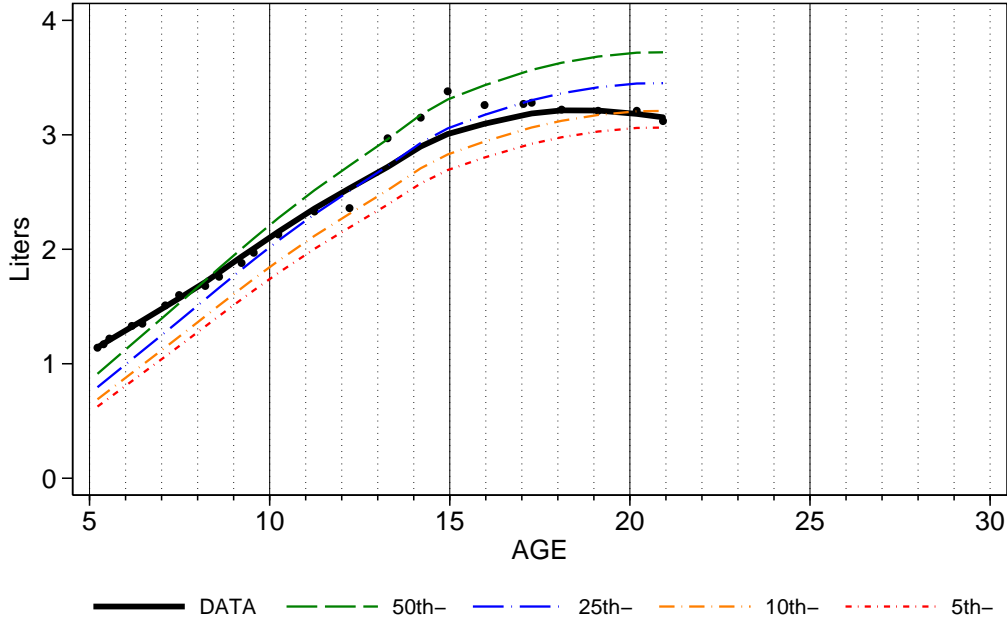

1916

**PATTERN OF GROWTH/DECLINE (Check One)**

- ( 1 ) Normal Growth
- ( 2 ) Normal Growth, Early Decline
- ( 3 ) Reduced Growth
- ( 4 ) Reduced Growth, Early Decline
- ( 9 ) Undetermined Pattern
- ( 8 ) Undetermined - not enough data

Maximum lung growth attained: ( 1 ) Yes ( 0 ) No

Plateau started: ( 2 ) No plateau ( 1 ) Yes ( 0 ) No

Decline started: ( 1 ) Yes ( 0 ) No

AGE AT each of the following periods (use '99' if N/A):

Maximum Lung Growth: \_\_\_\_ . \_\_\_\_

Start of Plateau: \_\_\_\_ . \_\_\_\_

Start of Decline: \_\_\_\_ . \_\_\_\_

### Pre-BD FEV1 Data and Percentiles: 1917

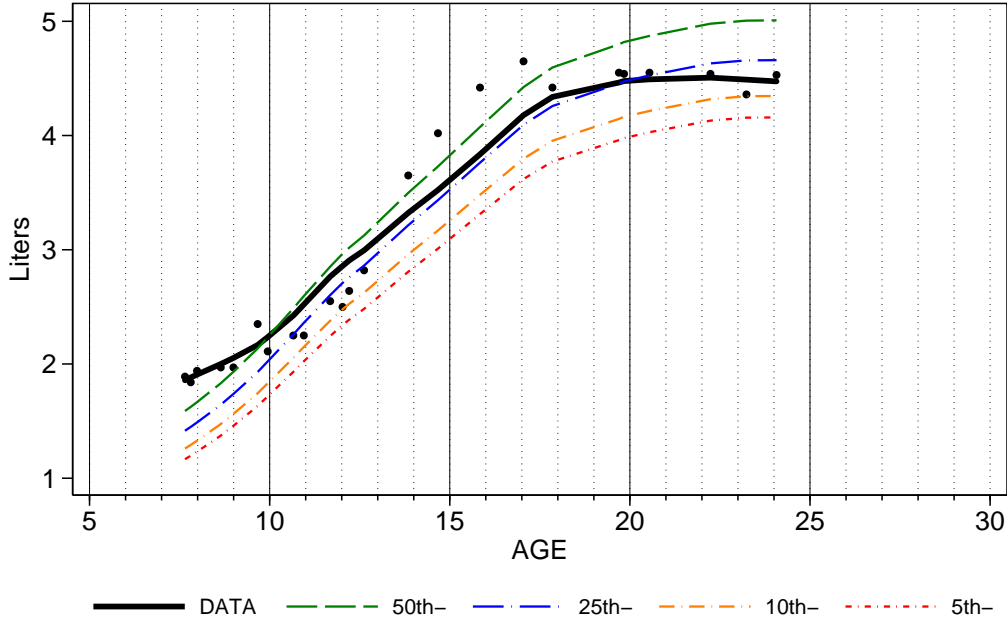

1917

**PATTERN OF GROWTH/DECLINE (Check One)**

- ( 1 ) Normal Growth
- ( 2 ) Normal Growth, Early Decline
- ( 3 ) Reduced Growth
- ( 4 ) Reduced Growth, Early Decline
- ( 9 ) Undetermined Pattern
- ( 8 ) Undetermined - not enough data

Maximum lung growth attained: ( 1 ) Yes ( 0 ) No

Plateau started: ( 2 ) No plateau ( 1 ) Yes ( 0 ) No

Decline started: ( 1 ) Yes ( 0 ) No

AGE AT each of the following periods (use '99' if N/A):

Maximum Lung Growth: \_\_\_\_ . \_\_\_\_

Start of Plateau: \_\_\_\_ . \_\_\_\_

Start of Decline: \_\_\_\_ . \_\_\_\_

### Pre-BD FEV1 Data and Percentiles: 1920

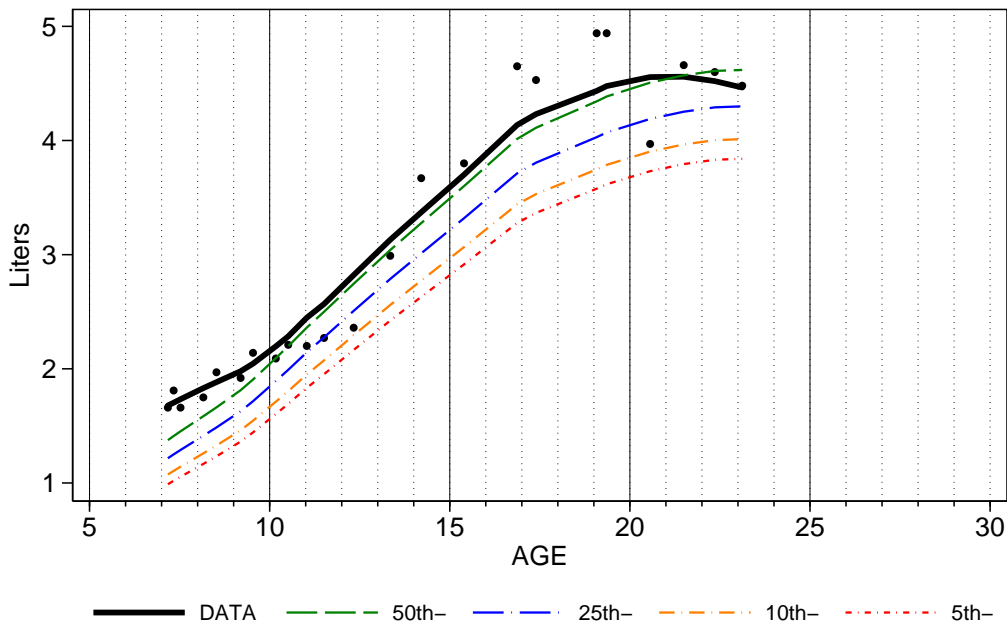

1920

**PATTERN OF GROWTH/DECLINE (Check One)**

- ( 1 ) Normal Growth
- ( 2 ) Normal Growth, Early Decline
- ( 3 ) Reduced Growth
- ( 4 ) Reduced Growth, Early Decline
- ( 9 ) Undetermined Pattern
- ( 8 ) Undetermined - not enough data

Maximum lung growth attained: ( 1 ) Yes ( 0 ) No

Plateau started: ( 2 ) No plateau ( 1 ) Yes ( 0 ) No

Decline started: ( 1 ) Yes ( 0 ) No

AGE AT each of the following periods (use '99' if N/A):

Maximum Lung Growth: \_\_\_\_ . \_\_\_\_

Start of Plateau: \_\_\_\_ . \_\_\_\_

Start of Decline: \_\_\_\_ . \_\_\_\_

### Pre-BD FEV1 Data and Percentiles: 1940

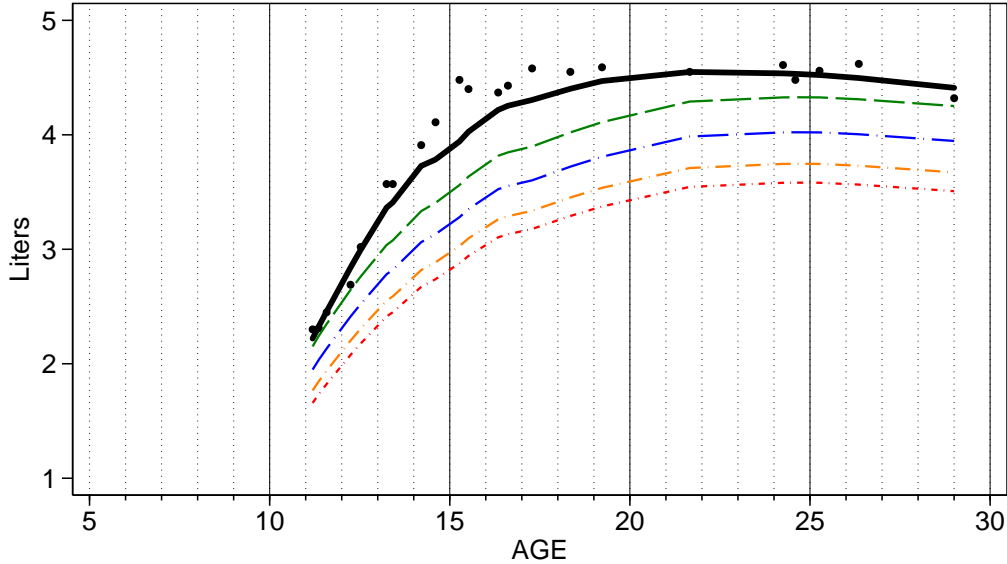

DATA  
  50th-  
  25th-  
  10th-  
  5th-

1940

**PATTERN OF GROWTH/DECLINE (Check One)**

- ( 1 ) Normal Growth
- ( 2 ) Normal Growth, Early Decline
- ( 3 ) Reduced Growth
- ( 4 ) Reduced Growth, Early Decline
- ( 9 ) Undetermined Pattern
- ( 8 ) Undetermined - not enough data

Maximum lung growth attained: ( 1 ) Yes ( 0 ) No

Plateau started: ( 2 ) No plateau ( 1 ) Yes ( 0 ) No

Decline started: ( 1 ) Yes ( 0 ) No

AGE AT each of the following periods (use '99' if N/A):

Maximum Lung Growth: \_\_\_\_ . \_\_\_\_

Start of Plateau: \_\_\_\_ . \_\_\_\_

Start of Decline: \_\_\_\_ . \_\_\_\_

### Pre-BD FEV1 Data and Percentiles: 1944

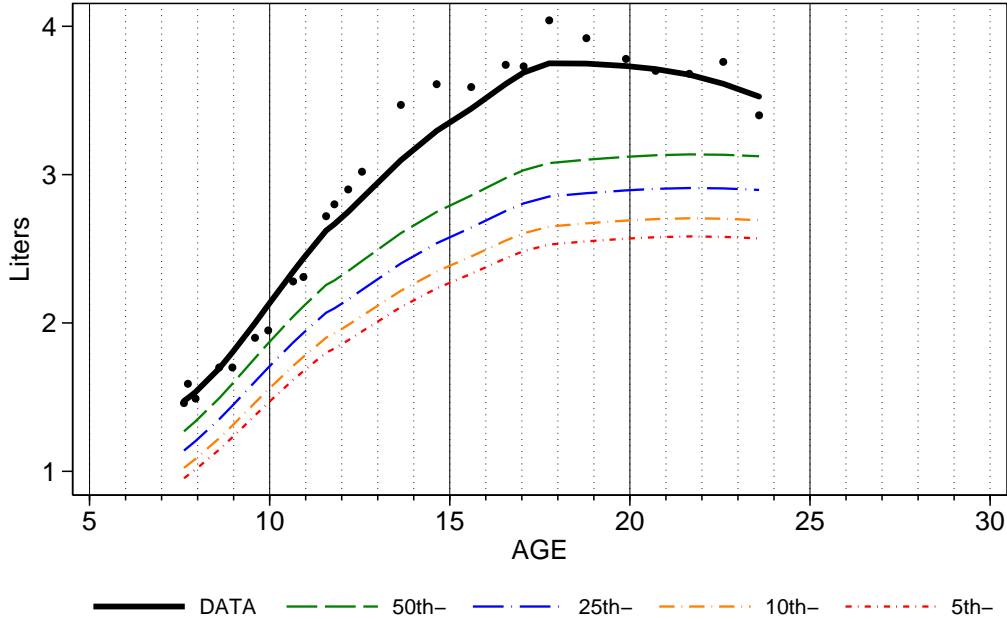

1944

**PATTERN OF GROWTH/DECLINE (Check One)**

- ( 1 ) Normal Growth
- ( 2 ) Normal Growth, Early Decline
- ( 3 ) Reduced Growth
- ( 4 ) Reduced Growth, Early Decline
- ( 9 ) Undetermined Pattern
- ( 8 ) Undetermined - not enough data

Maximum lung growth attained: ( 1 ) Yes ( 0 ) No

Plateau started: ( 2 ) No plateau ( 1 ) Yes ( 0 ) No

Decline started: ( 1 ) Yes ( 0 ) No

AGE AT each of the following periods (use '99' if N/A):

Maximum Lung Growth: \_\_\_\_ . \_\_\_\_

Start of Plateau: \_\_\_\_ . \_\_\_\_

Start of Decline: \_\_\_\_ . \_\_\_\_



### Pre-BD FEV1 Data and Percentiles: 1948

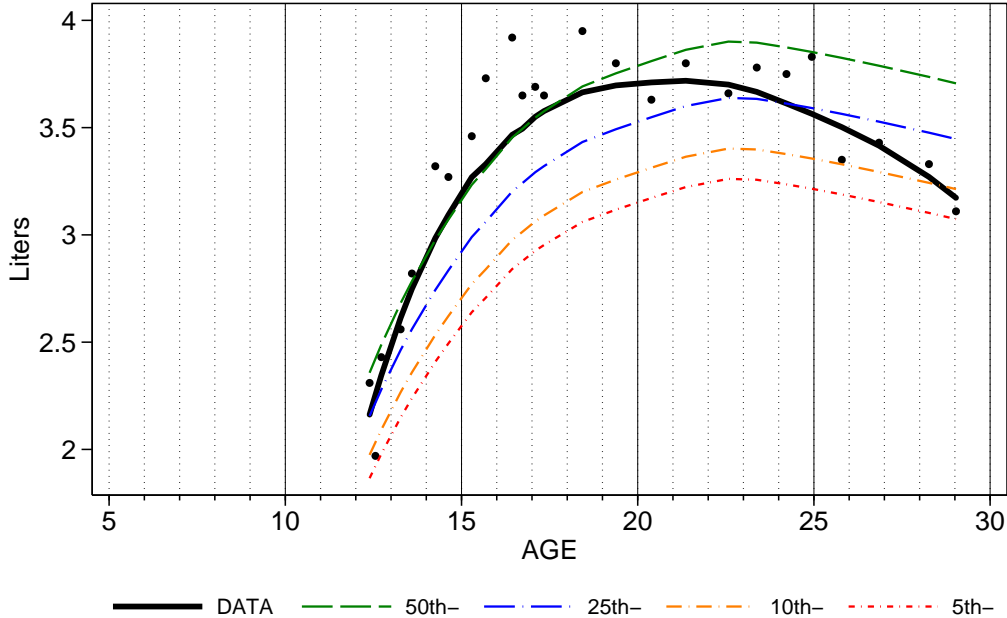

1948

**PATTERN OF GROWTH/DECLINE (Check One)**

- ( 1) Normal Growth
- ( 2) Normal Growth, Early Decline
- ( 3) Reduced Growth
- ( 4) Reduced Growth, Early Decline
- ( 9) Undetermined Pattern
- ( 8) Undetermined - not enough data

Maximum lung growth attained: ( 1) Yes ( 0) No

Plateau started: ( 2) No plateau ( 1) Yes ( 0) No

Decline started: ( 1) Yes ( 0) No

AGE AT each of the following periods (use '99' if N/A):

Maximum Lung Growth: \_\_\_\_ . \_\_\_\_

Start of Plateau: \_\_\_\_ . \_\_\_\_

Start of Decline: \_\_\_\_ . \_\_\_\_

### Pre-BD FEV1 Data and Percentiles: 1952

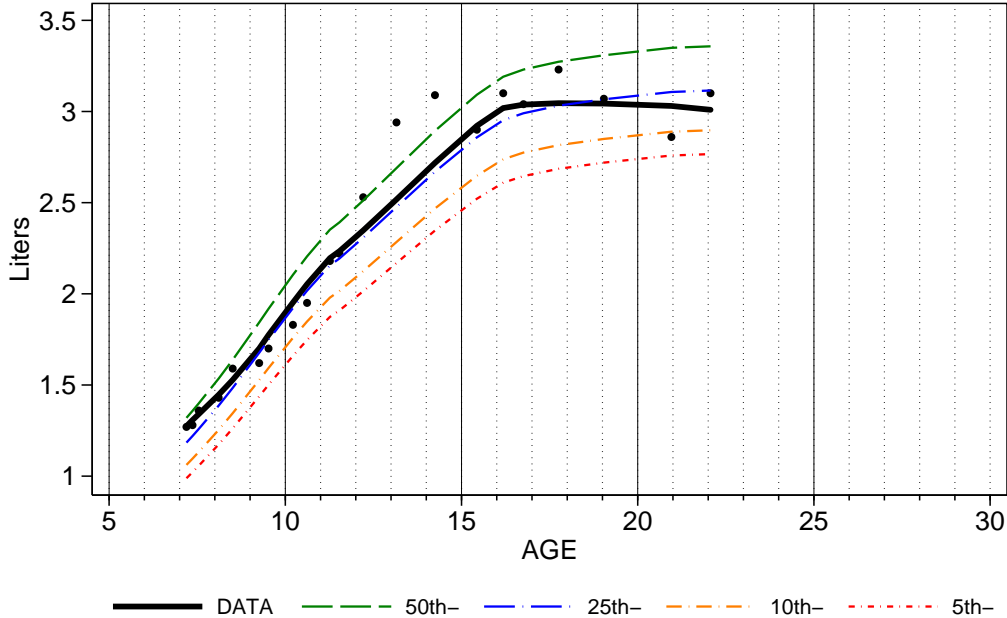

1952

**PATTERN OF GROWTH/DECLINE (Check One)**

- ( 1 ) Normal Growth
- ( 2 ) Normal Growth, Early Decline
- ( 3 ) Reduced Growth
- ( 4 ) Reduced Growth, Early Decline
- ( 9 ) Undetermined Pattern
- ( 8 ) Undetermined - not enough data

Maximum lung growth attained: ( 1 ) Yes ( 0 ) No

Plateau started: ( 2 ) No plateau ( 1 ) Yes ( 0 ) No

Decline started: ( 1 ) Yes ( 0 ) No

AGE AT each of the following periods (use '99' if N/A):

Maximum Lung Growth: \_\_\_\_ . \_\_\_\_

Start of Plateau: \_\_\_\_ . \_\_\_\_

Start of Decline: \_\_\_\_ . \_\_\_\_

### Pre-BD FEV1 Data and Percentiles: 1959

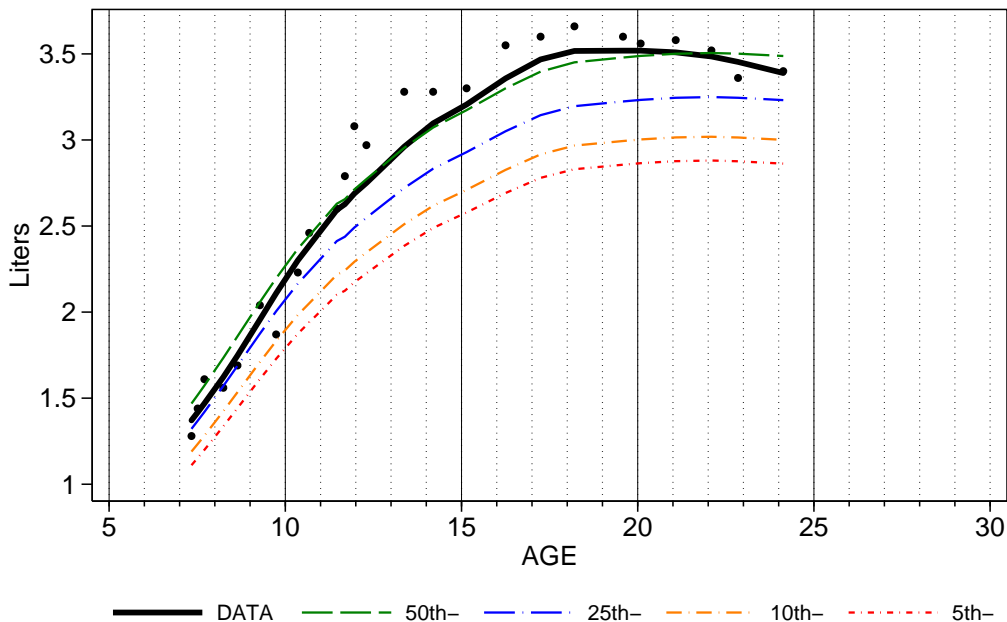

1959

**PATTERN OF GROWTH/DECLINE (Check One)**

- ( 1 ) Normal Growth
- ( 2 ) Normal Growth, Early Decline
- ( 3 ) Reduced Growth
- ( 4 ) Reduced Growth, Early Decline
- ( 9 ) Undetermined Pattern
- ( 8 ) Undetermined - not enough data

Maximum lung growth attained: ( 1 ) Yes ( 0 ) No

Plateau started: ( 2 ) No plateau ( 1 ) Yes ( 0 ) No

Decline started: ( 1 ) Yes ( 0 ) No

AGE AT each of the following periods (use '99' if N/A):

Maximum Lung Growth: \_\_\_\_ . \_\_\_\_

Start of Plateau: \_\_\_\_ . \_\_\_\_

Start of Decline: \_\_\_\_ . \_\_\_\_

### Pre-BD FEV1 Data and Percentiles: 1962

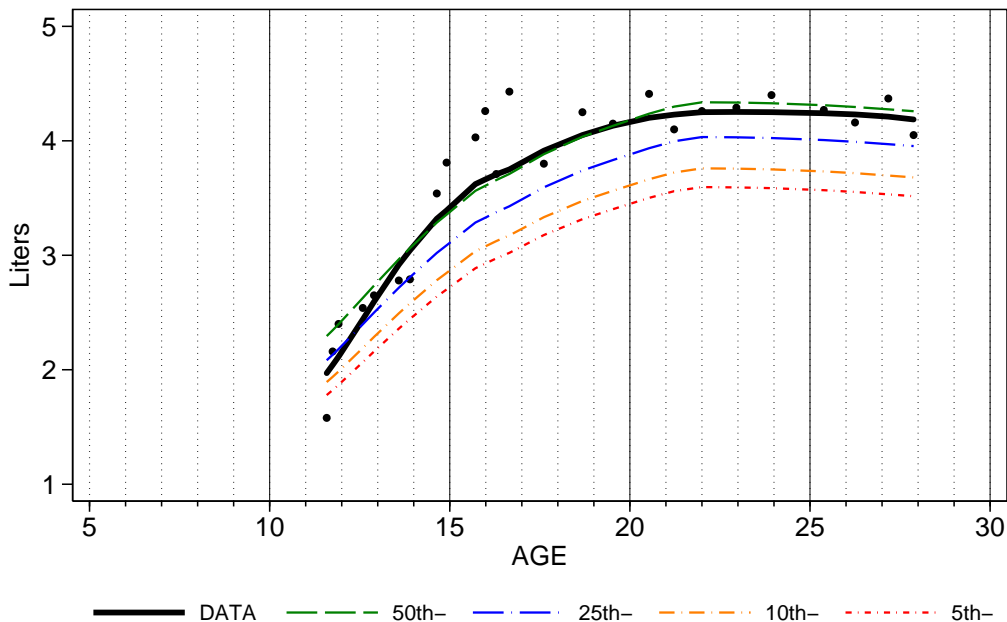

1962

**PATTERN OF GROWTH/DECLINE (Check One)**

- ( 1 ) Normal Growth
- ( 2 ) Normal Growth, Early Decline
- ( 3 ) Reduced Growth
- ( 4 ) Reduced Growth, Early Decline
- ( 9 ) Undetermined Pattern
- ( 8 ) Undetermined - not enough data

Maximum lung growth attained: ( 1 ) Yes ( 0 ) No

Plateau started: ( 2 ) No plateau ( 1 ) Yes ( 0 ) No

Decline started: ( 1 ) Yes ( 0 ) No

AGE AT each of the following periods (use '99' if N/A):

Maximum Lung Growth: \_\_\_\_ . \_\_\_\_

Start of Plateau: \_\_\_\_ . \_\_\_\_

Start of Decline: \_\_\_\_ . \_\_\_\_

### Pre-BD FEV1 Data and Percentiles: 1969

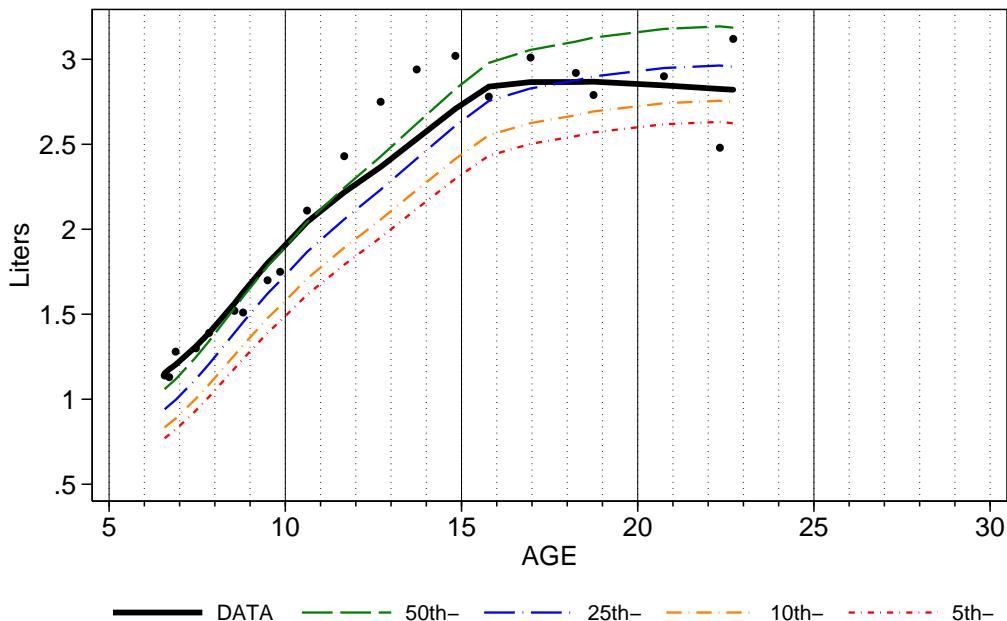

1969

**PATTERN OF GROWTH/DECLINE (Check One)**

- ( 1 ) Normal Growth
- ( 2 ) Normal Growth, Early Decline
- ( 3 ) Reduced Growth
- ( 4 ) Reduced Growth, Early Decline
- ( 9 ) Undetermined Pattern
- ( 8 ) Undetermined - not enough data

Maximum lung growth attained: ( 1 ) Yes ( 0 ) No

Plateau started: ( 2 ) No plateau ( 1 ) Yes ( 0 ) No

Decline started: ( 1 ) Yes ( 0 ) No

AGE AT each of the following periods (use '99' if N/A):

Maximum Lung Growth: \_\_\_\_ . \_\_\_\_

Start of Plateau: \_\_\_\_ . \_\_\_\_

Start of Decline: \_\_\_\_ . \_\_\_\_

### Pre-BD FEV1 Data and Percentiles: 1972

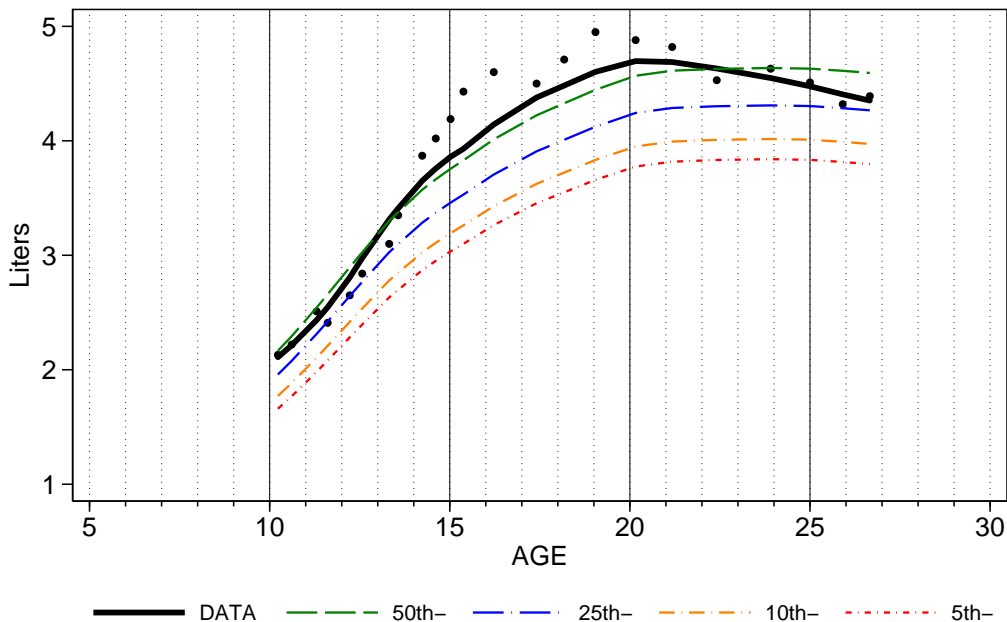

1972

**PATTERN OF GROWTH/DECLINE (Check One)**

- ( 1 ) Normal Growth
- ( 2 ) Normal Growth, Early Decline
- ( 3 ) Reduced Growth
- ( 4 ) Reduced Growth, Early Decline
- ( 9 ) Undetermined Pattern
- ( 8 ) Undetermined - not enough data

Maximum lung growth attained: ( 1 ) Yes ( 0 ) No

Plateau started: ( 2 ) No plateau ( 1 ) Yes ( 0 ) No

Decline started: ( 1 ) Yes ( 0 ) No

AGE AT each of the following periods (use '99' if N/A):

Maximum Lung Growth: \_\_\_\_ . \_\_\_\_

Start of Plateau: \_\_\_\_ . \_\_\_\_

Start of Decline: \_\_\_\_ . \_\_\_\_

### Pre-BD FEV1 Data and Percentiles: 1975

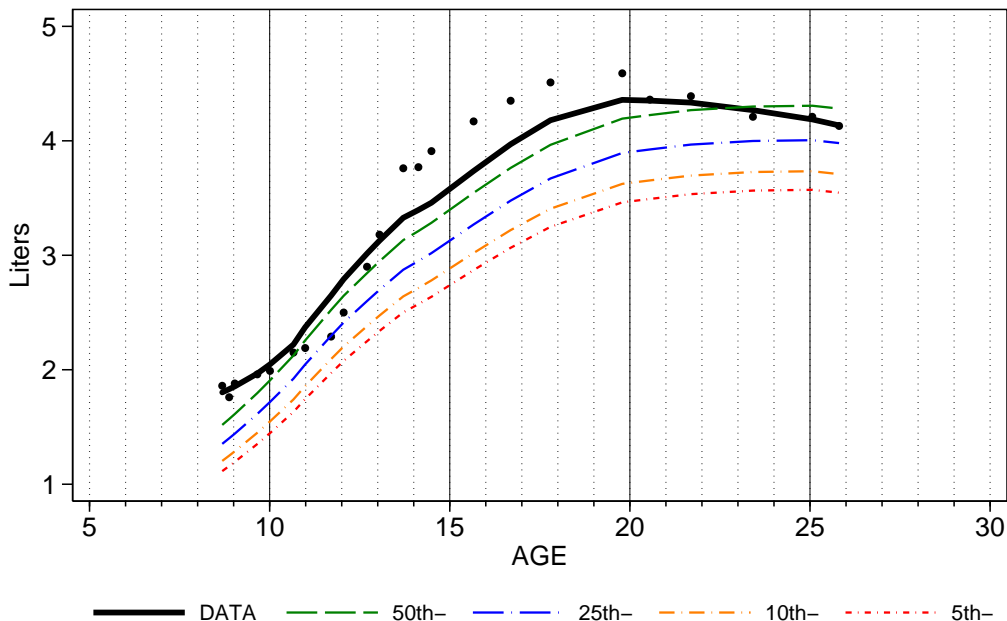

1975

**PATTERN OF GROWTH/DECLINE (Check One)**

- ( 1 ) Normal Growth
- ( 2 ) Normal Growth, Early Decline
- ( 3 ) Reduced Growth
- ( 4 ) Reduced Growth, Early Decline
- ( 9 ) Undetermined Pattern
- ( 8 ) Undetermined - not enough data

Maximum lung growth attained: ( 1 ) Yes ( 0 ) No

Plateau started: ( 2 ) No plateau ( 1 ) Yes ( 0 ) No

Decline started: ( 1 ) Yes ( 0 ) No

AGE AT each of the following periods (use '99' if N/A):

Maximum Lung Growth: \_\_\_\_ . \_\_\_\_

Start of Plateau: \_\_\_\_ . \_\_\_\_

Start of Decline: \_\_\_\_ . \_\_\_\_

### Pre-BD FEV1 Data and Percentiles: 1976

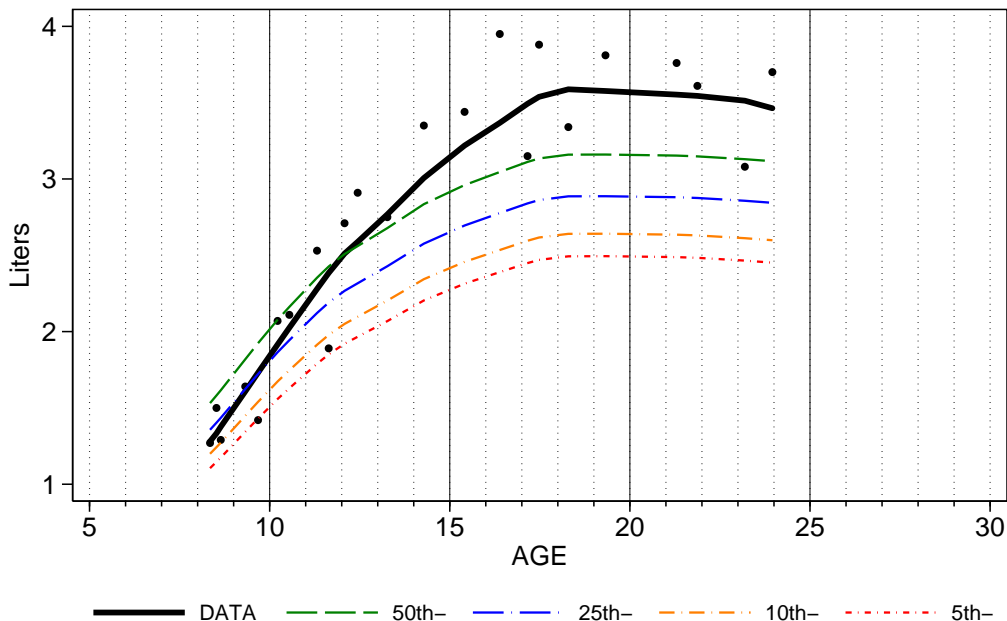

1976

**PATTERN OF GROWTH/DECLINE (Check One)**

- ( 1 ) Normal Growth
- ( 2 ) Normal Growth, Early Decline
- ( 3 ) Reduced Growth
- ( 4 ) Reduced Growth, Early Decline
- ( 9 ) Undetermined Pattern
- ( 8 ) Undetermined - not enough data

Maximum lung growth attained: ( 1 ) Yes ( 0 ) No

Plateau started: ( 2 ) No plateau ( 1 ) Yes ( 0 ) No

Decline started: ( 1 ) Yes ( 0 ) No

AGE AT each of the following periods (use '99' if N/A):

Maximum Lung Growth: \_\_\_\_ . \_\_\_\_

Start of Plateau: \_\_\_\_ . \_\_\_\_

Start of Decline: \_\_\_\_ . \_\_\_\_



### Pre-BD FEV1 Data and Percentiles: 1978

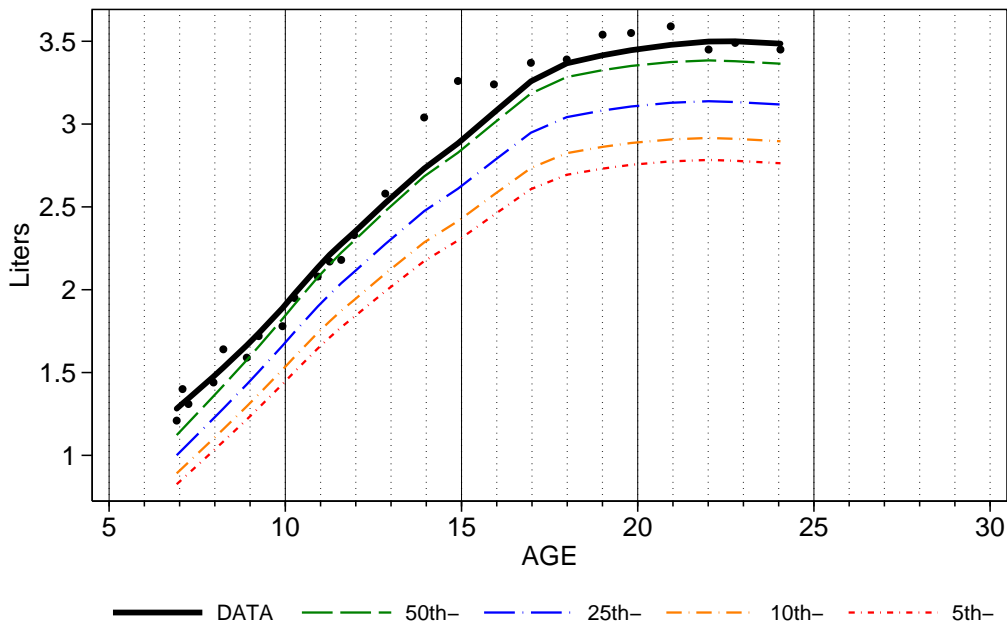

1978

**PATTERN OF GROWTH/DECLINE (Check One)**

- ( 1) Normal Growth
- ( 2) Normal Growth, Early Decline
- ( 3) Reduced Growth
- ( 4) Reduced Growth, Early Decline
- ( 9) Undetermined Pattern
- ( 8) Undetermined - not enough data

Maximum lung growth attained: ( 1) Yes ( 0) No

Plateau started: ( 2) No plateau ( 1) Yes ( 0) No

Decline started: ( 1) Yes ( 0) No

AGE AT each of the following periods (use '99' if N/A):

Maximum Lung Growth: \_\_\_\_ . \_\_\_\_

Start of Plateau: \_\_\_\_ . \_\_\_\_

Start of Decline: \_\_\_\_ . \_\_\_\_

### Pre-BD FEV1 Data and Percentiles: 1979

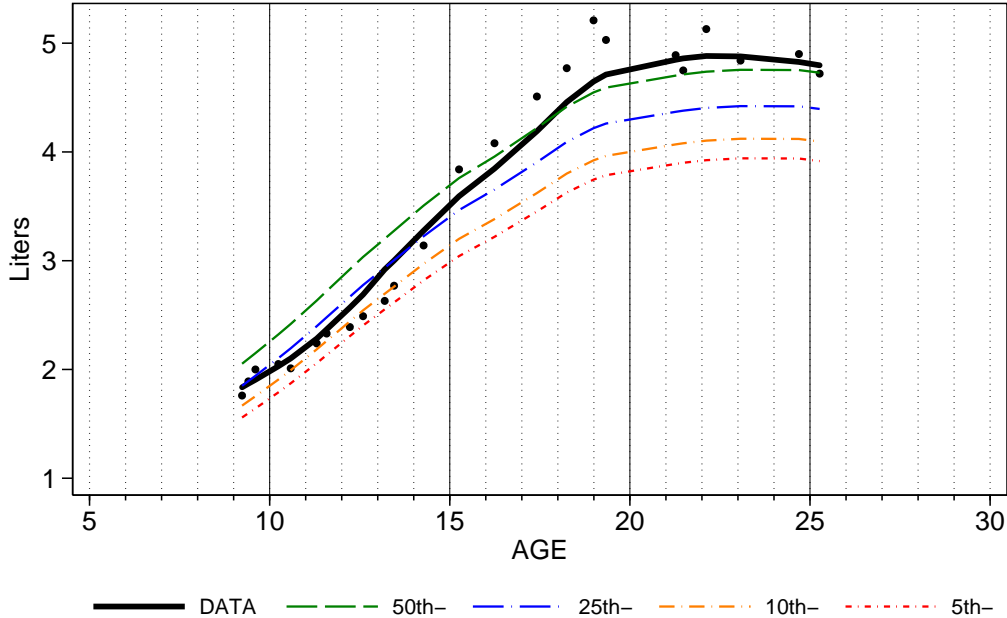

1979

**PATTERN OF GROWTH/DECLINE (Check One)**

- ( 1 ) Normal Growth
- ( 2 ) Normal Growth, Early Decline
- ( 3 ) Reduced Growth
- ( 4 ) Reduced Growth, Early Decline
- ( 9 ) Undetermined Pattern
- ( 8 ) Undetermined - not enough data

Maximum lung growth attained: ( 1 ) Yes ( 0 ) No

Plateau started: ( 2 ) No plateau ( 1 ) Yes ( 0 ) No

Decline started: ( 1 ) Yes ( 0 ) No

AGE AT each of the following periods (use '99' if N/A):

Maximum Lung Growth: \_\_\_\_ . \_\_\_\_

Start of Plateau: \_\_\_\_ . \_\_\_\_

Start of Decline: \_\_\_\_ . \_\_\_\_

### Pre-BD FEV1 Data and Percentiles: 1987

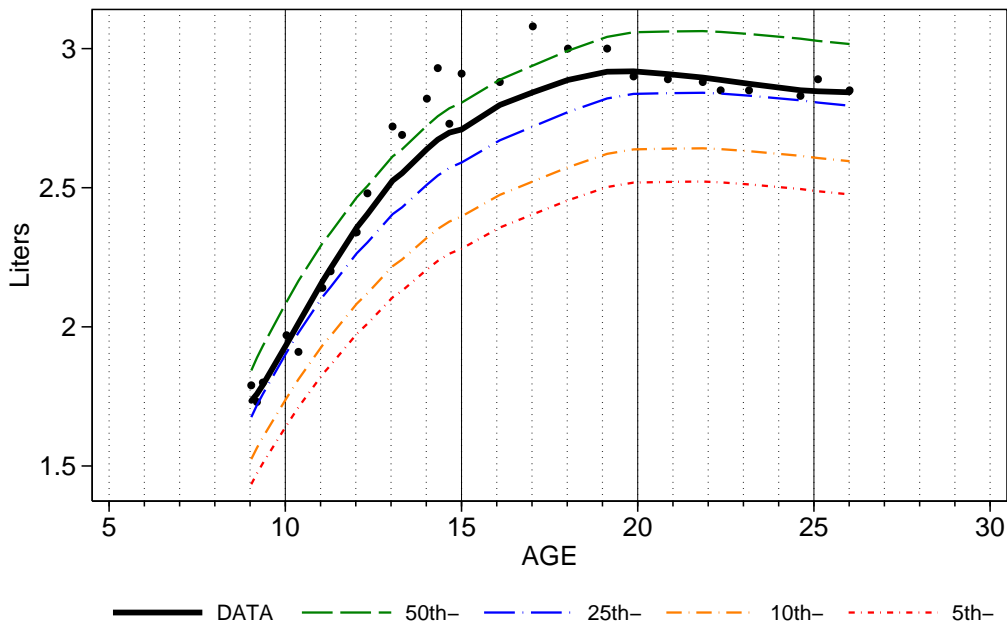

1987

**PATTERN OF GROWTH/DECLINE (Check One)**

- ( 1) Normal Growth
- ( 2) Normal Growth, Early Decline
- ( 3) Reduced Growth
- ( 4) Reduced Growth, Early Decline
- ( 9) Undetermined Pattern
- ( 8) Undetermined - not enough data

Maximum lung growth attained: ( 1) Yes ( 0) No

Plateau started: ( 2) No plateau ( 1) Yes ( 0) No

Decline started: ( 1) Yes ( 0) No

AGE AT each of the following periods (use '99' if N/A):

Maximum Lung Growth: \_\_\_\_ . \_\_\_\_

Start of Plateau: \_\_\_\_ . \_\_\_\_

Start of Decline: \_\_\_\_ . \_\_\_\_

### Pre-BD FEV1 Data and Percentiles: 1993

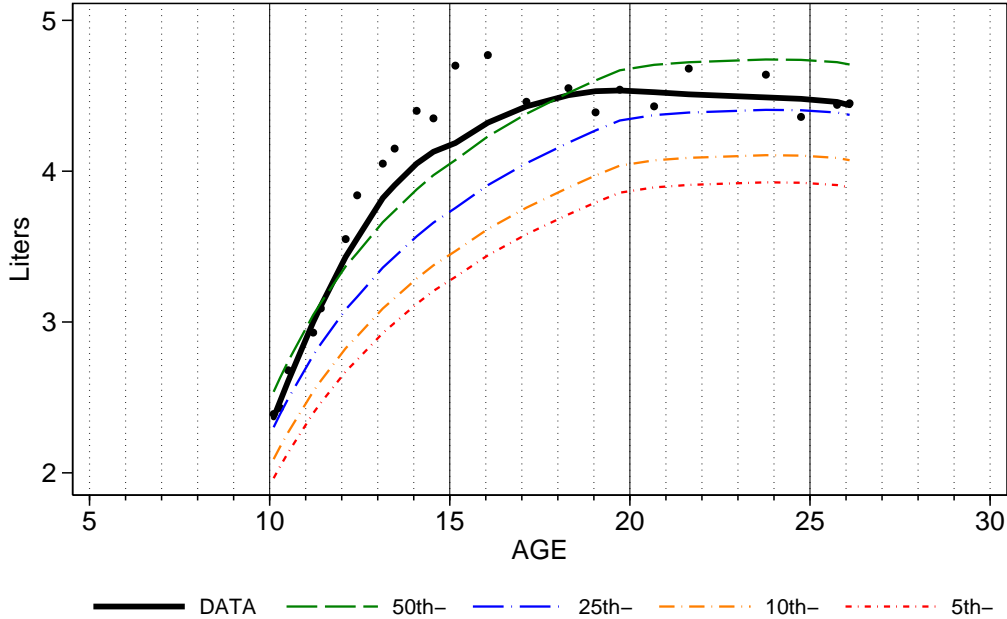

1993

**PATTERN OF GROWTH/DECLINE (Check One)**

- ( 1) Normal Growth
- ( 2) Normal Growth, Early Decline
- ( 3) Reduced Growth
- ( 4) Reduced Growth, Early Decline
- ( 9) Undetermined Pattern
- ( 8) Undetermined - not enough data

Maximum lung growth attained: ( 1) Yes ( 0) No

Plateau started: ( 2) No plateau ( 1) Yes ( 0) No

Decline started: ( 1) Yes ( 0) No

AGE AT each of the following periods (use '99' if N/A):

Maximum Lung Growth: \_\_\_\_ . \_\_\_\_

Start of Plateau: \_\_\_\_ . \_\_\_\_

Start of Decline: \_\_\_\_ . \_\_\_\_

### Pre-BD FEV1 Data and Percentiles: 1998

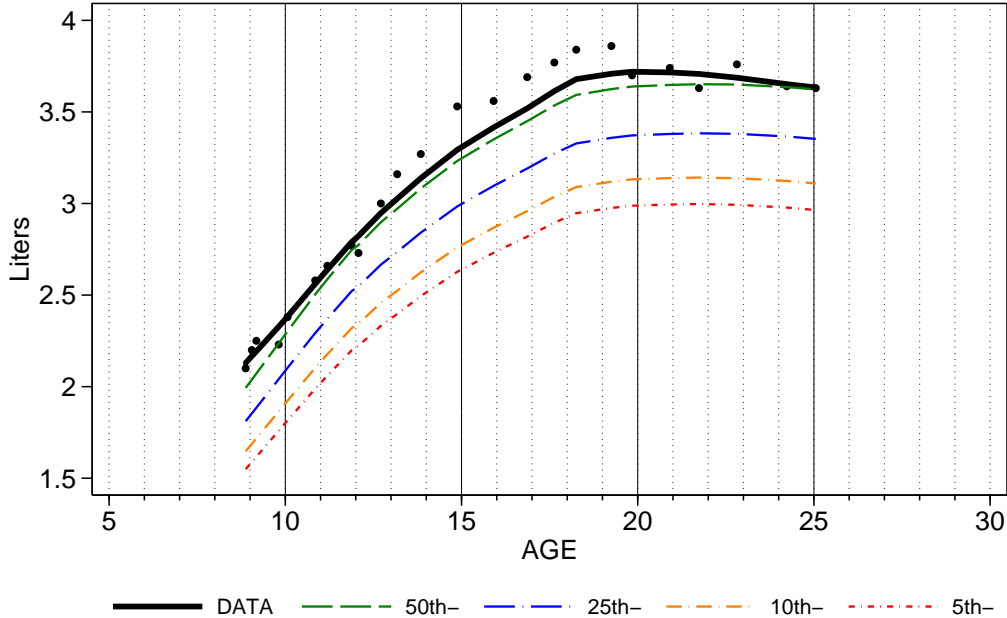

1998

**PATTERN OF GROWTH/DECLINE (Check One)**

- ( 1) Normal Growth
- ( 2) Normal Growth, Early Decline
- ( 3) Reduced Growth
- ( 4) Reduced Growth, Early Decline
- ( 9) Undetermined Pattern
- ( 8) Undetermined - not enough data

Maximum lung growth attained: ( 1) Yes ( 0) No

Plateau started: ( 2) No plateau ( 1) Yes ( 0) No

Decline started: ( 1) Yes ( 0) No

AGE AT each of the following periods (use '99' if N/A):

Maximum Lung Growth: \_\_\_\_ . \_\_\_\_

Start of Plateau: \_\_\_\_ . \_\_\_\_

Start of Decline: \_\_\_\_ . \_\_\_\_

### Pre-BD FEV1 Data and Percentiles: 2012

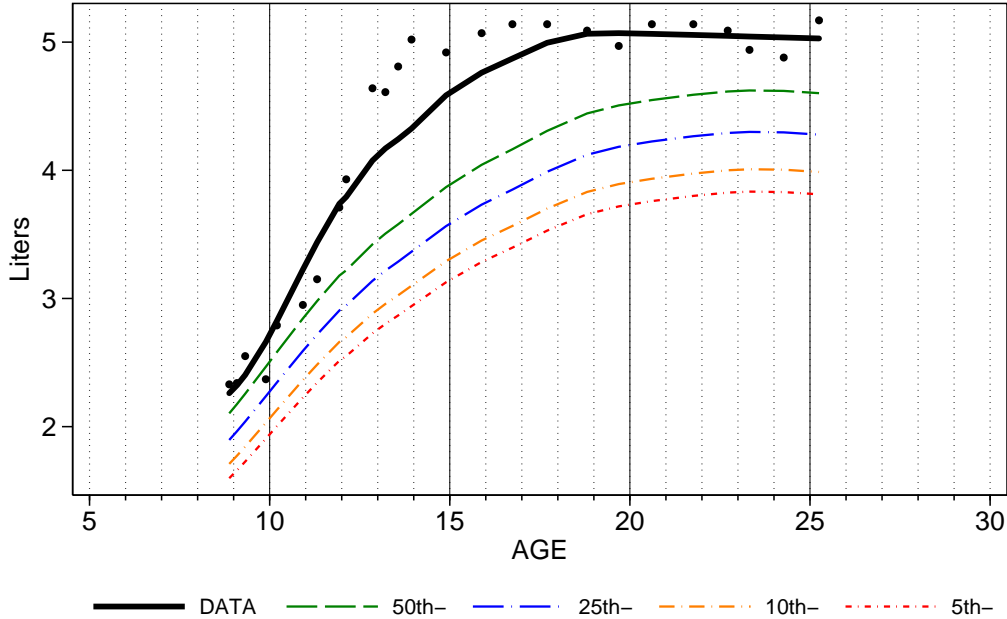

2012

**PATTERN OF GROWTH/DECLINE (Check One)**

- ( 1) Normal Growth
- ( 2) Normal Growth, Early Decline
- ( 3) Reduced Growth
- ( 4) Reduced Growth, Early Decline
- ( 9) Undetermined Pattern
- ( 8) Undetermined - not enough data

Maximum lung growth attained: ( 1) Yes ( 0) No

Plateau started: ( 2) No plateau ( 1) Yes ( 0) No

Decline started: ( 1) Yes ( 0) No

AGE AT each of the following periods (use '99' if N/A):

Maximum Lung Growth: \_\_\_\_ . \_\_\_\_

Start of Plateau: \_\_\_\_ . \_\_\_\_

Start of Decline: \_\_\_\_ . \_\_\_\_

### Pre-BD FEV1 Data and Percentiles: 2013

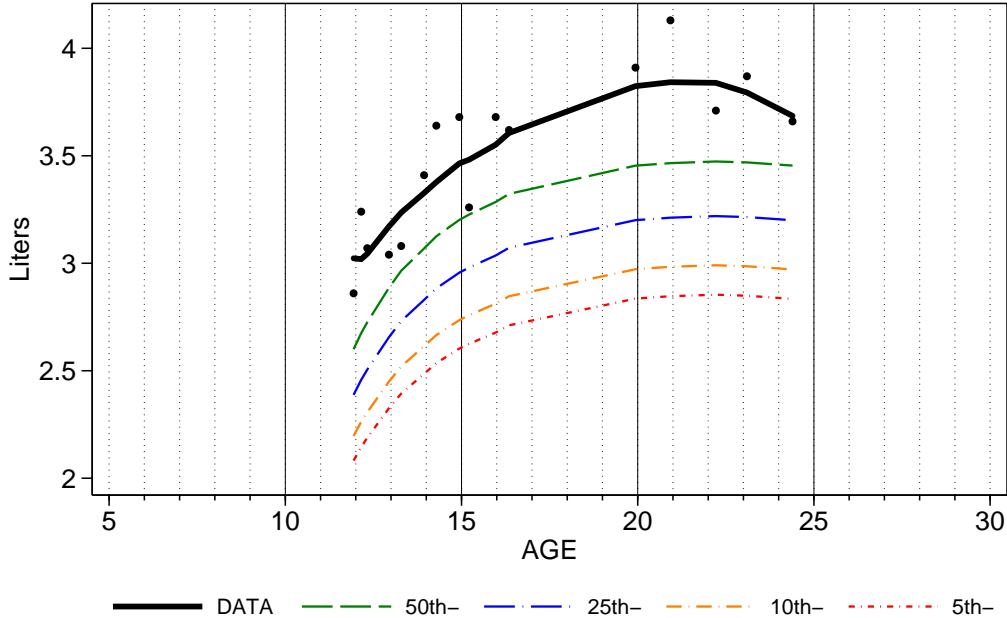

2013

**PATTERN OF GROWTH/DECLINE (Check One)**

- ( 1) Normal Growth
- ( 2) Normal Growth, Early Decline
- ( 3) Reduced Growth
- ( 4) Reduced Growth, Early Decline
- ( 9) Undetermined Pattern
- ( 8) Undetermined - not enough data

Maximum lung growth attained: ( 1) Yes ( 0) No

Plateau started: ( 2) No plateau ( 1) Yes ( 0) No

Decline started: ( 1) Yes ( 0) No

AGE AT each of the following periods (use '99' if N/A):

Maximum Lung Growth: \_\_\_\_ . \_\_\_\_

Start of Plateau: \_\_\_\_ . \_\_\_\_

Start of Decline: \_\_\_\_ . \_\_\_\_

### Pre-BD FEV1 Data and Percentiles: 2016

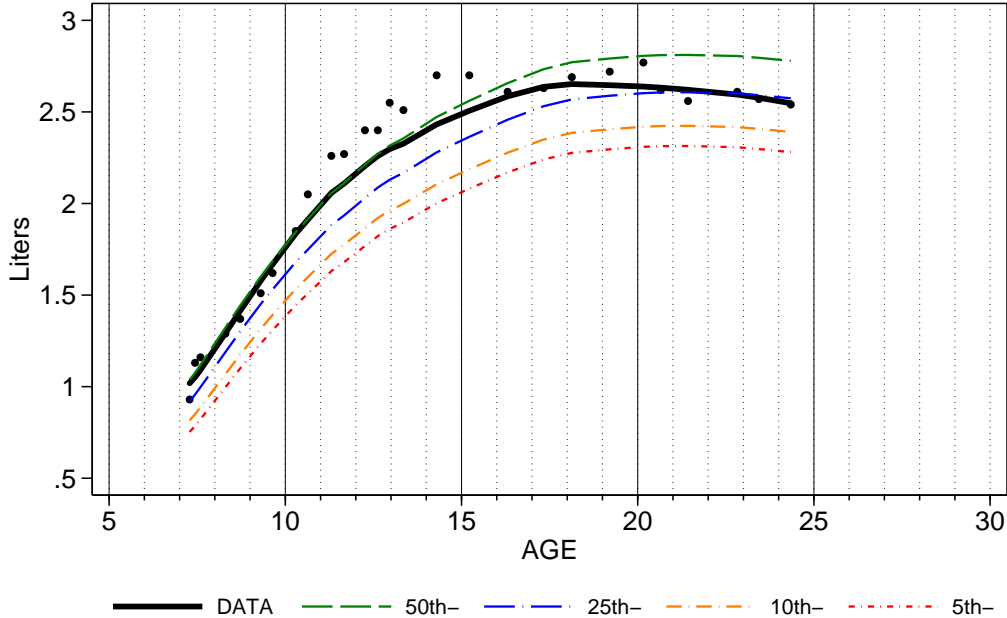

2016

**PATTERN OF GROWTH/DECLINE (Check One)**

- ( 1 ) Normal Growth
- ( 2 ) Normal Growth, Early Decline
- ( 3 ) Reduced Growth
- ( 4 ) Reduced Growth, Early Decline
- ( 9 ) Undetermined Pattern
- ( 8 ) Undetermined - not enough data

Maximum lung growth attained: ( 1 ) Yes ( 0 ) No

Plateau started: ( 2 ) No plateau ( 1 ) Yes ( 0 ) No

Decline started: ( 1 ) Yes ( 0 ) No

AGE AT each of the following periods (use '99' if N/A):

Maximum Lung Growth: \_\_\_\_ . \_\_\_\_

Start of Plateau: \_\_\_\_ . \_\_\_\_

Start of Decline: \_\_\_\_ . \_\_\_\_



### Pre-BD FEV1 Data and Percentiles: 2023

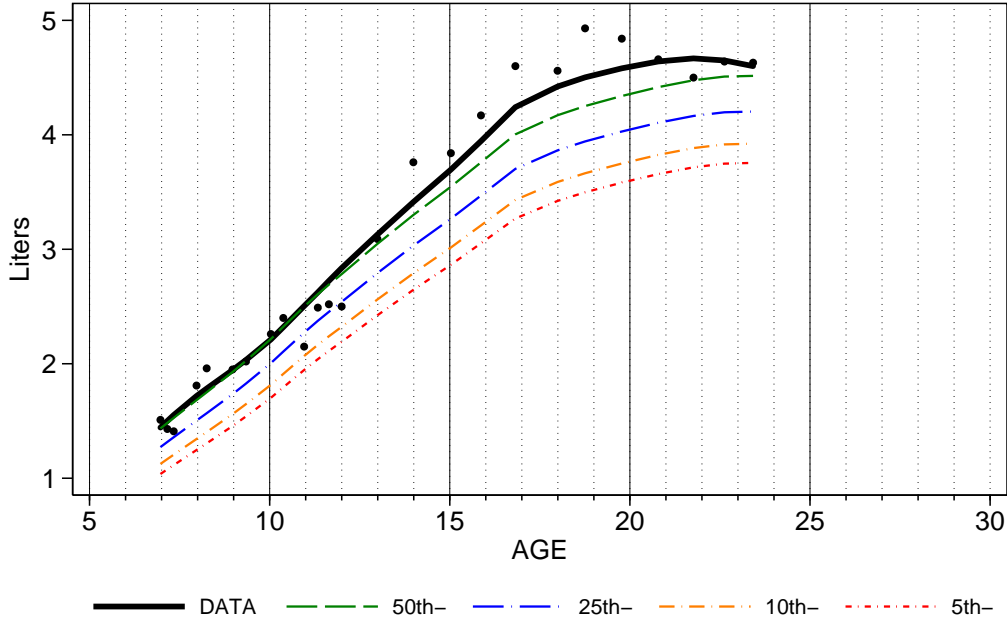

2023

**PATTERN OF GROWTH/DECLINE (Check One)**

- ( 1 ) Normal Growth
- ( 2 ) Normal Growth, Early Decline
- ( 3 ) Reduced Growth
- ( 4 ) Reduced Growth, Early Decline
- ( 9 ) Undetermined Pattern
- ( 8 ) Undetermined - not enough data

Maximum lung growth attained: ( 1 ) Yes ( 0 ) No

Plateau started: ( 2 ) No plateau ( 1 ) Yes ( 0 ) No

Decline started: ( 1 ) Yes ( 0 ) No

AGE AT each of the following periods (use '99' if N/A):

Maximum Lung Growth: \_\_\_\_ . \_\_\_\_

Start of Plateau: \_\_\_\_ . \_\_\_\_

Start of Decline: \_\_\_\_ . \_\_\_\_

### Pre-BD FEV1 Data and Percentiles: 2024

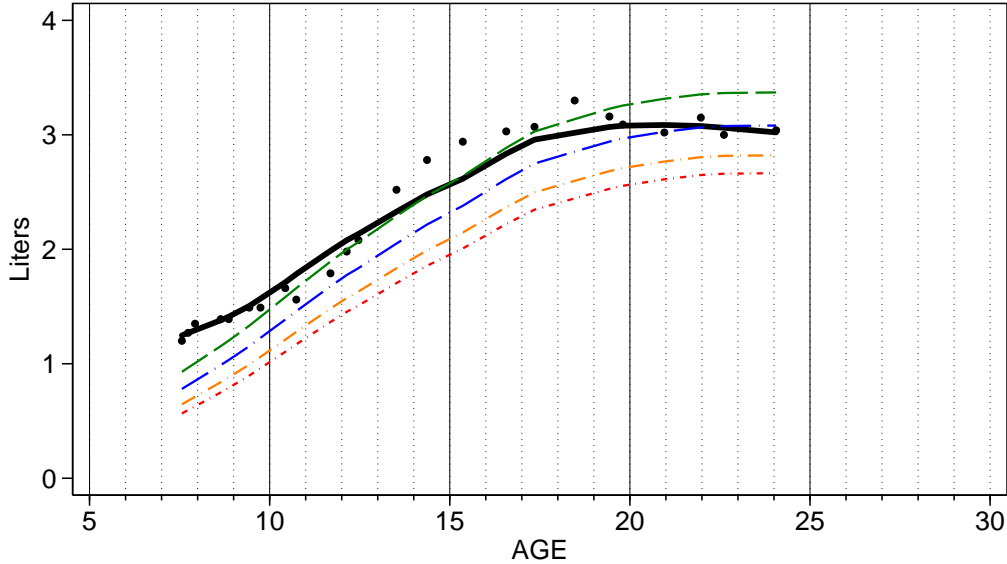

DATA  
  50th-  
  25th-  
  10th-  
  5th-

2024

**PATTERN OF GROWTH/DECLINE (Check One)**

- ( 1 ) Normal Growth
- ( 2 ) Normal Growth, Early Decline
- ( 3 ) Reduced Growth
- ( 4 ) Reduced Growth, Early Decline
- ( 9 ) Undetermined Pattern
- ( 8 ) Undetermined - not enough data

Maximum lung growth attained: ( 1 ) Yes ( 0 ) No

Plateau started: ( 2 ) No plateau ( 1 ) Yes ( 0 ) No

Decline started: ( 1 ) Yes ( 0 ) No

AGE AT each of the following periods (use '99' if N/A):

Maximum Lung Growth: \_\_\_\_ . \_\_\_\_

Start of Plateau: \_\_\_\_ . \_\_\_\_

Start of Decline: \_\_\_\_ . \_\_\_\_

### Pre-BD FEV1 Data and Percentiles: 2025

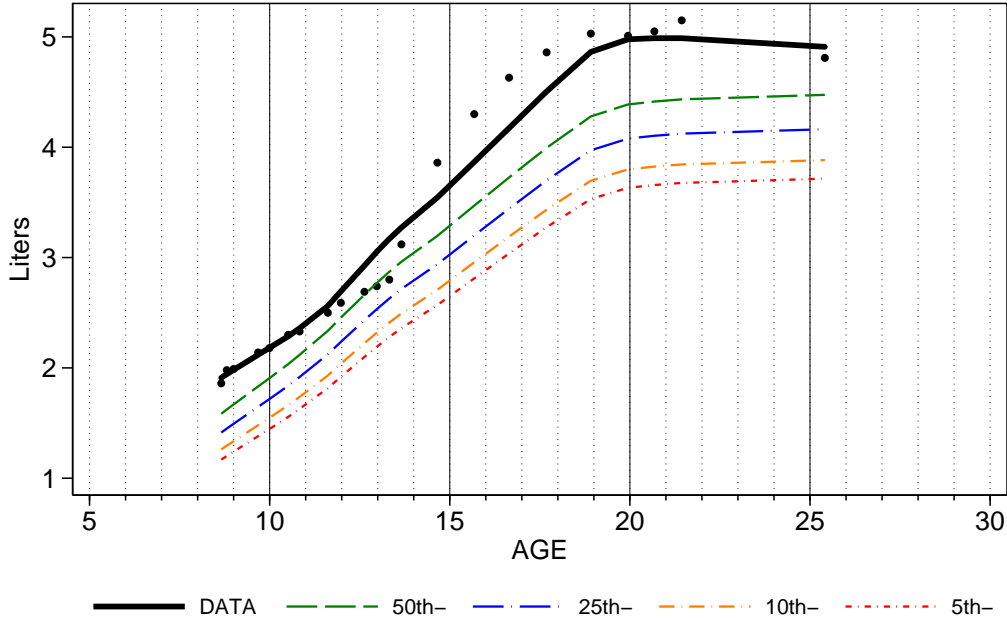

2025

**PATTERN OF GROWTH/DECLINE (Check One)**

- ( 1 ) Normal Growth
- ( 2 ) Normal Growth, Early Decline
- ( 3 ) Reduced Growth
- ( 4 ) Reduced Growth, Early Decline
- ( 9 ) Undetermined Pattern
- ( 8 ) Undetermined - not enough data

Maximum lung growth attained: ( 1 ) Yes ( 0 ) No

Plateau started: ( 2 ) No plateau ( 1 ) Yes ( 0 ) No

Decline started: ( 1 ) Yes ( 0 ) No

AGE AT each of the following periods (use '99' if N/A):

Maximum Lung Growth: \_\_\_\_ . \_\_\_\_

Start of Plateau: \_\_\_\_ . \_\_\_\_

Start of Decline: \_\_\_\_ . \_\_\_\_

### Pre-BD FEV1 Data and Percentiles: 2036

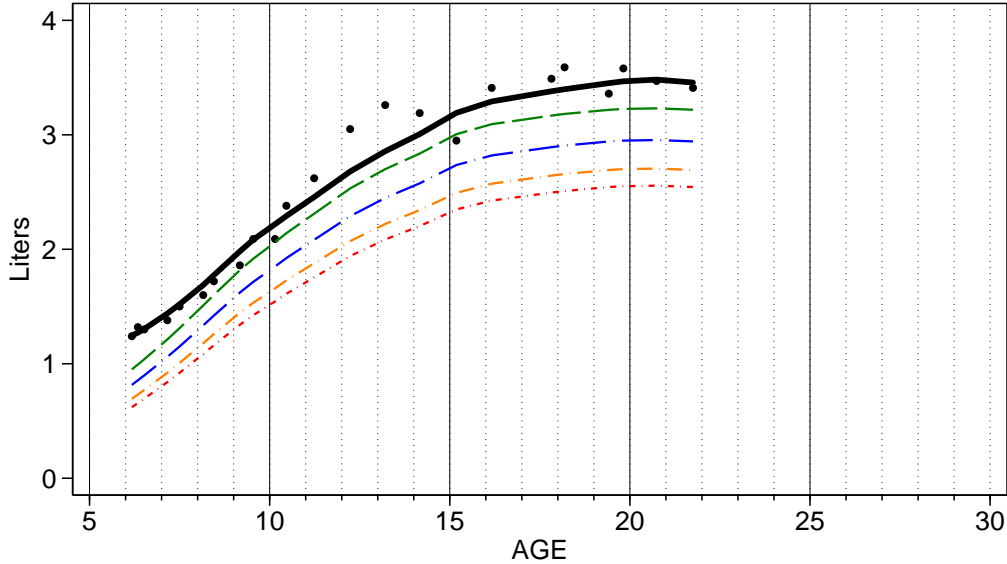

DATA  
  50th-  
  25th-  
  10th-  
  5th-

2036

- PATTERN OF GROWTH/DECLINE (Check One)
- ( 1 ) Normal Growth
  - ( 2 ) Normal Growth, Early Decline
  - ( 3 ) Reduced Growth
  - ( 4 ) Reduced Growth, Early Decline
  - ( 9 ) Undetermined Pattern
  - ( 8 ) Undetermined - not enough data

Maximum lung growth attained: ( 1 ) Yes ( 0 ) No  
 Plateau started: ( 2 ) No plateau ( 1 ) Yes ( 0 ) No  
 Decline started: ( 1 ) Yes ( 0 ) No

AGE AT each of the following periods (use '99' if N/A):

Maximum Lung Growth: \_\_\_\_ . \_\_\_\_

Start of Plateau: \_\_\_\_ . \_\_\_\_

Start of Decline: \_\_\_\_ . \_\_\_\_

### Pre-BD FEV1 Data and Percentiles: 2039

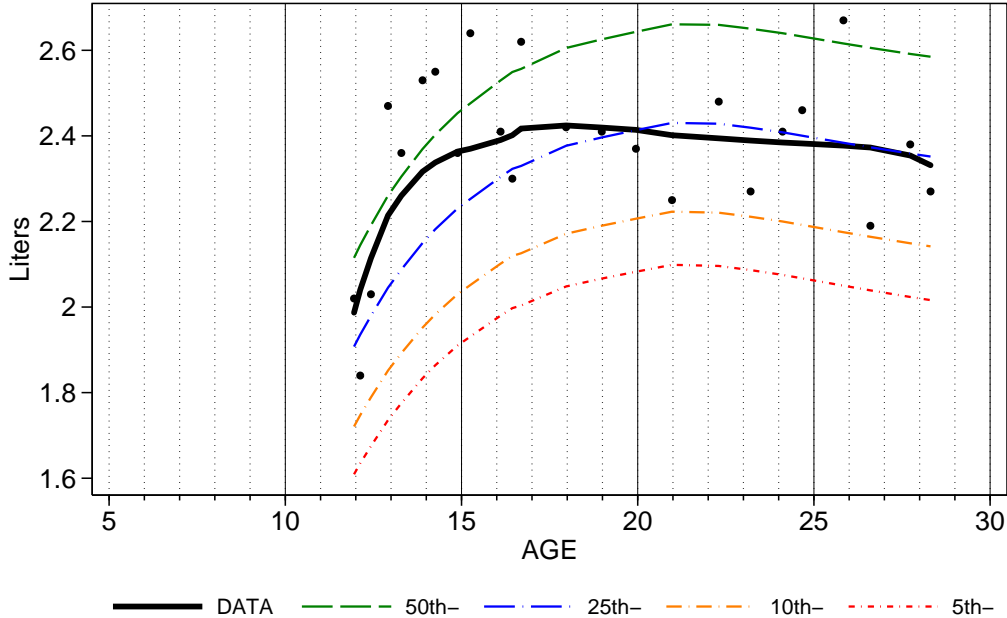

2039

**PATTERN OF GROWTH/DECLINE (Check One)**

- ( 1) Normal Growth
- ( 2) Normal Growth, Early Decline
- ( 3) Reduced Growth
- ( 4) Reduced Growth, Early Decline
- ( 9) Undetermined Pattern
- ( 8) Undetermined - not enough data

Maximum lung growth attained: ( 1) Yes ( 0) No

Plateau started: ( 2) No plateau ( 1) Yes ( 0) No

Decline started: ( 1) Yes ( 0) No

AGE AT each of the following periods (use '99' if N/A):

Maximum Lung Growth: \_\_\_\_ . \_\_\_\_

Start of Plateau: \_\_\_\_ . \_\_\_\_

Start of Decline: \_\_\_\_ . \_\_\_\_

### Pre-BD FEV1 Data and Percentiles: 1002

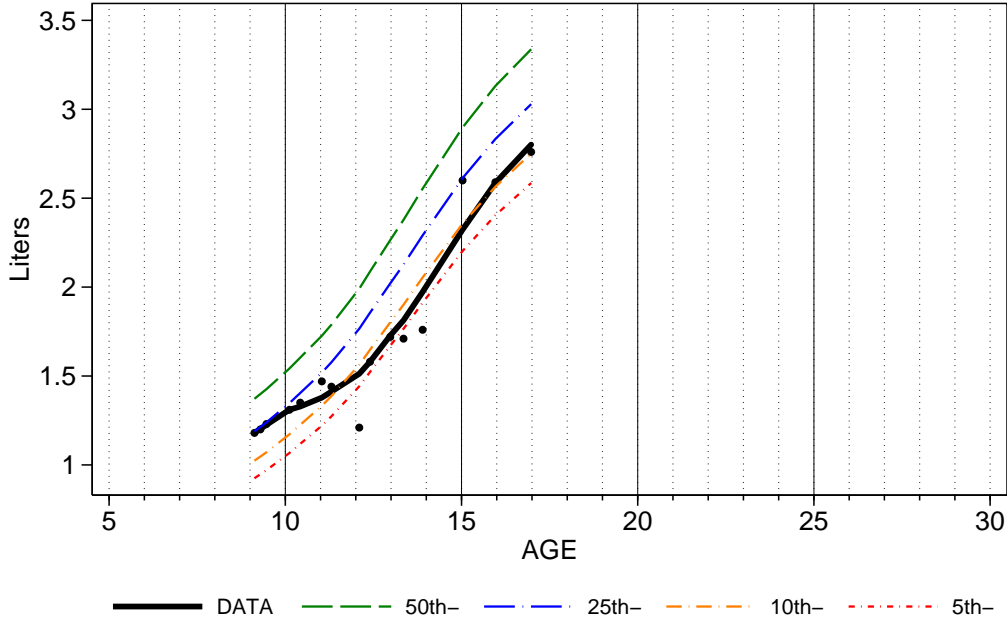

1002

**PATTERN OF GROWTH/DECLINE (Check One)**

- ( 1 ) Normal Growth
- ( 2 ) Normal Growth, Early Decline
- ( 3 ) Reduced Growth
- ( 4 ) Reduced Growth, Early Decline
- ( 9 ) Undetermined Pattern
- ( 8 ) Undetermined - not enough data

Maximum lung growth attained: ( 1 ) Yes ( 0 ) No

Plateau started: ( 2 ) No plateau ( 1 ) Yes ( 0 ) No

Decline started: ( 1 ) Yes ( 0 ) No

AGE AT each of the following periods (use '99' if N/A):

Maximum Lung Growth: \_\_\_\_ . \_\_\_\_

Start of Plateau: \_\_\_\_ . \_\_\_\_

Start of Decline: \_\_\_\_ . \_\_\_\_

### Pre-BD FEV1 Data and Percentiles: 1006

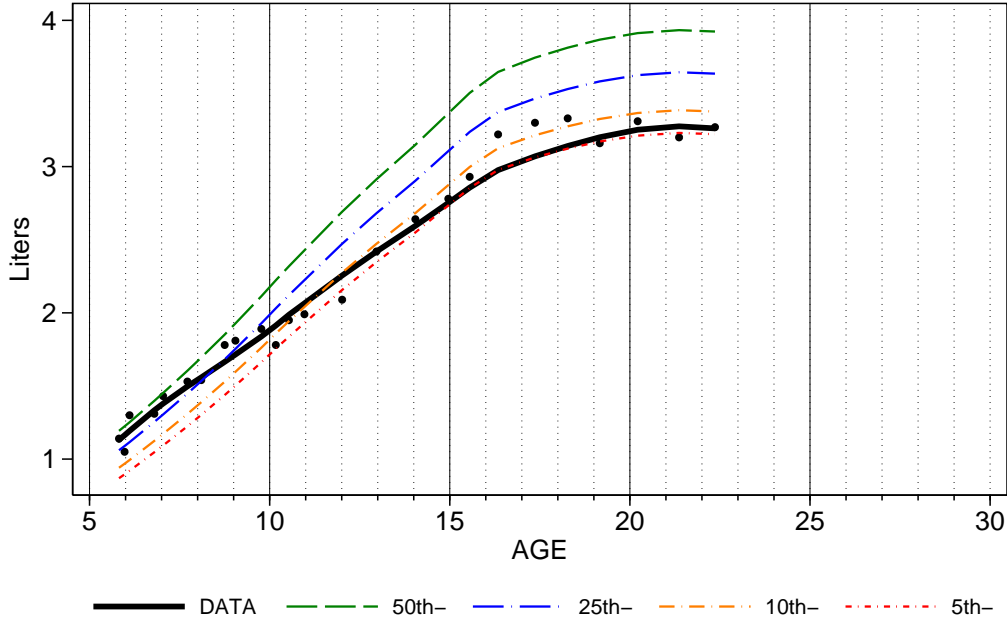

1006

**PATTERN OF GROWTH/DECLINE (Check One)**

- ( 1 ) Normal Growth
- ( 2 ) Normal Growth, Early Decline
- ( 3 ) Reduced Growth
- ( 4 ) Reduced Growth, Early Decline
- ( 9 ) Undetermined Pattern
- ( 8 ) Undetermined - not enough data

Maximum lung growth attained: ( 1 ) Yes ( 0 ) No

Plateau started: ( 2 ) No plateau ( 1 ) Yes ( 0 ) No

Decline started: ( 1 ) Yes ( 0 ) No

AGE AT each of the following periods (use '99' if N/A):

Maximum Lung Growth: \_\_\_\_ . \_\_\_\_

Start of Plateau: \_\_\_\_ . \_\_\_\_

Start of Decline: \_\_\_\_ . \_\_\_\_

### Pre-BD FEV1 Data and Percentiles: 1007

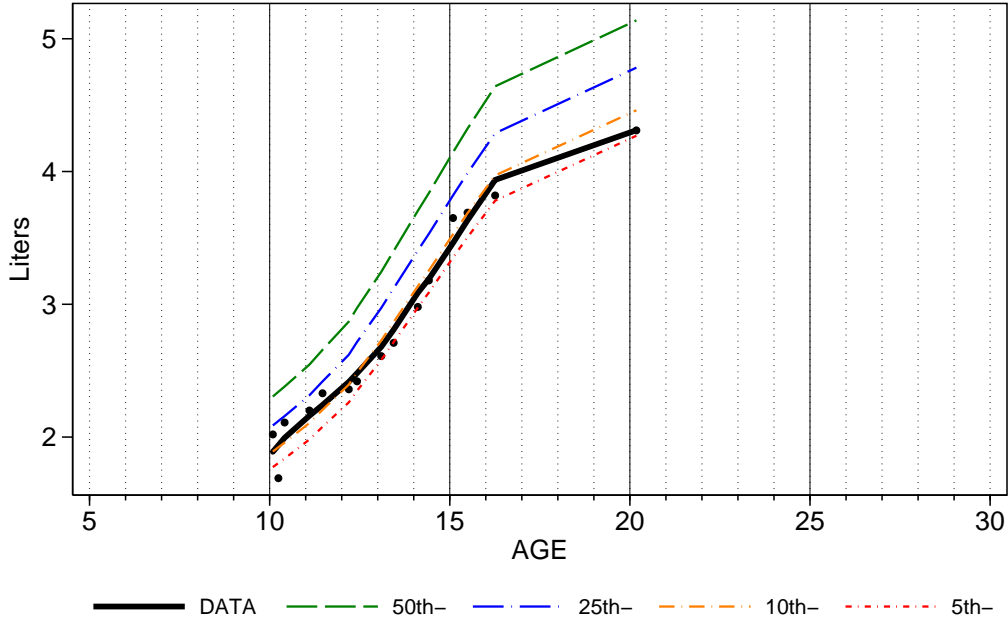

1007

**PATTERN OF GROWTH/DECLINE (Check One)**

- ( 1) Normal Growth
- ( 2) Normal Growth, Early Decline
- ( 3) Reduced Growth
- ( 4) Reduced Growth, Early Decline
- ( 9) Undetermined Pattern
- ( 8) Undetermined - not enough data

Maximum lung growth attained: ( 1) Yes ( 0) No

Plateau started: ( 2) No plateau ( 1) Yes ( 0) No

Decline started: ( 1) Yes ( 0) No

AGE AT each of the following periods (use '99' if N/A):

Maximum Lung Growth: \_\_\_\_ . \_\_\_\_

Start of Plateau: \_\_\_\_ . \_\_\_\_

Start of Decline: \_\_\_\_ . \_\_\_\_



### Pre-BD FEV1 Data and Percentiles: 1011

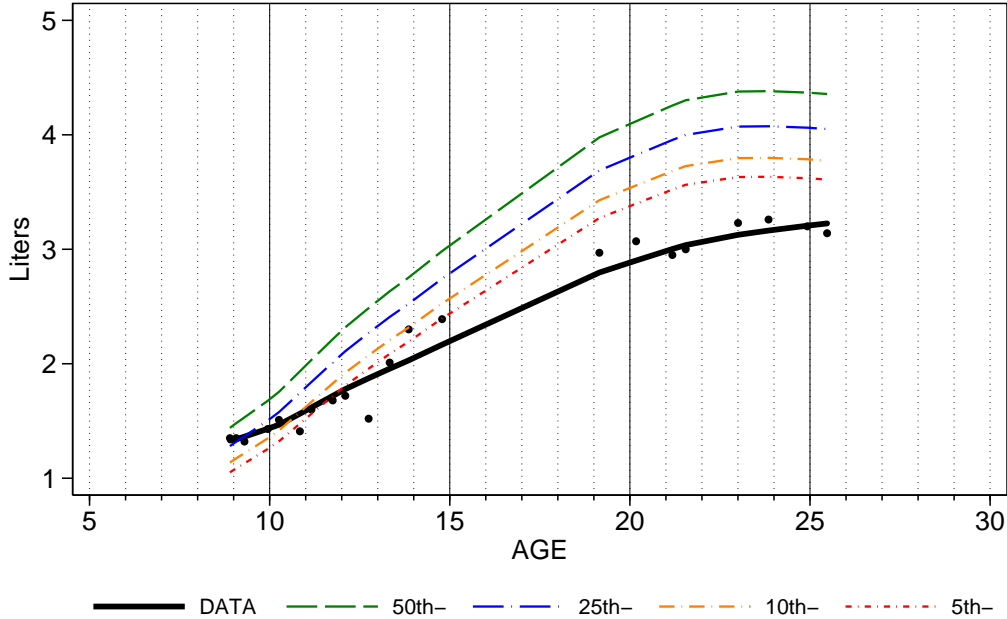

1011

**PATTERN OF GROWTH/DECLINE (Check One)**

- ( 1 ) Normal Growth
- ( 2 ) Normal Growth, Early Decline
- ( 3 ) Reduced Growth
- ( 4 ) Reduced Growth, Early Decline
- ( 9 ) Undetermined Pattern
- ( 8 ) Undetermined - not enough data

Maximum lung growth attained: ( 1 ) Yes ( 0 ) No

Plateau started: ( 2 ) No plateau ( 1 ) Yes ( 0 ) No

Decline started: ( 1 ) Yes ( 0 ) No

AGE AT each of the following periods (use '99' if N/A):

Maximum Lung Growth: \_\_\_\_ . \_\_\_\_

Start of Plateau: \_\_\_\_ . \_\_\_\_

Start of Decline: \_\_\_\_ . \_\_\_\_

### Pre-BD FEV1 Data and Percentiles: 1020

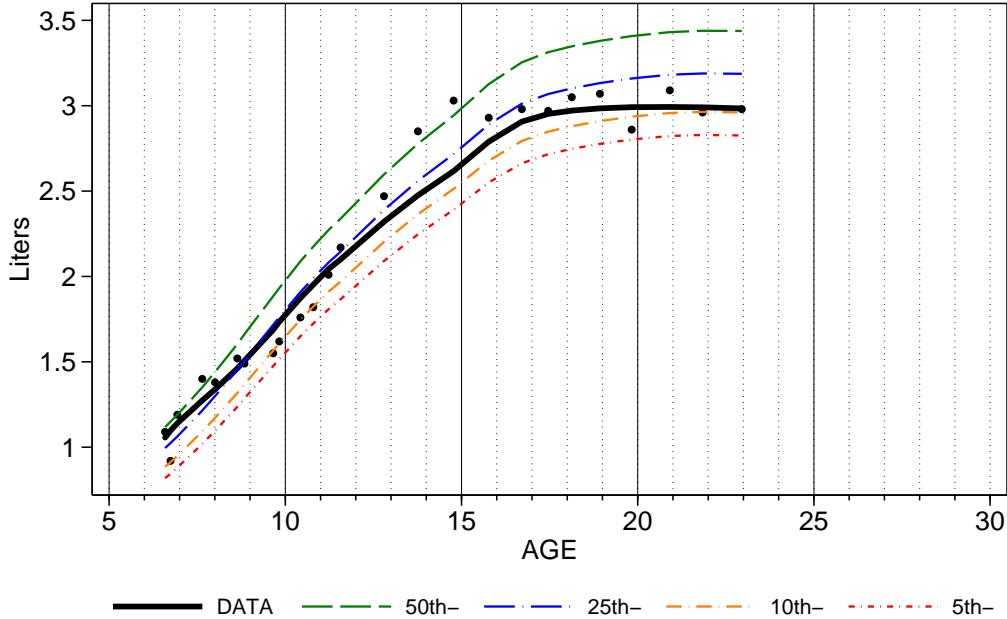

1020

**PATTERN OF GROWTH/DECLINE (Check One)**

- ( 1 ) Normal Growth
- ( 2 ) Normal Growth, Early Decline
- ( 3 ) Reduced Growth
- ( 4 ) Reduced Growth, Early Decline
- ( 9 ) Undetermined Pattern
- ( 8 ) Undetermined - not enough data

Maximum lung growth attained: ( 1 ) Yes ( 0 ) No

Plateau started: ( 2 ) No plateau ( 1 ) Yes ( 0 ) No

Decline started: ( 1 ) Yes ( 0 ) No

AGE AT each of the following periods (use '99' if N/A):

Maximum Lung Growth: \_\_\_\_ . \_\_\_\_

Start of Plateau: \_\_\_\_ . \_\_\_\_

Start of Decline: \_\_\_\_ . \_\_\_\_

### Pre-BD FEV1 Data and Percentiles: 1029

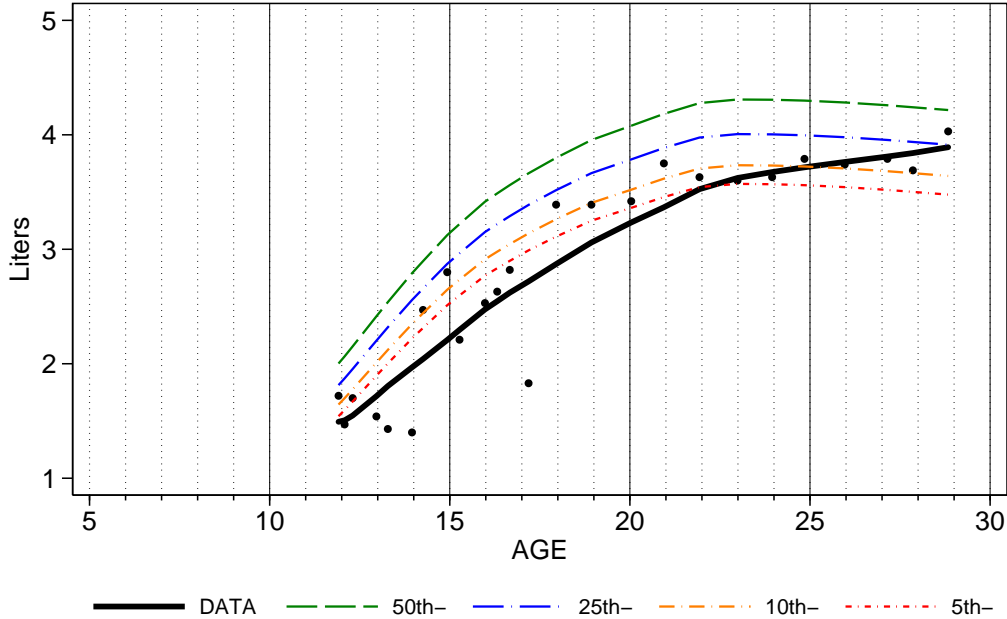

1029

**PATTERN OF GROWTH/DECLINE (Check One)**

- ( 1) Normal Growth
- ( 2) Normal Growth, Early Decline
- ( 3) Reduced Growth
- ( 4) Reduced Growth, Early Decline
- ( 9) Undetermined Pattern
- ( 8) Undetermined - not enough data

Maximum lung growth attained: ( 1) Yes ( 0) No

Plateau started: ( 2) No plateau ( 1) Yes ( 0) No

Decline started: ( 1) Yes ( 0) No

AGE AT each of the following periods (use '99' if N/A):

Maximum Lung Growth: \_\_\_\_ . \_\_\_\_

Start of Plateau: \_\_\_\_ . \_\_\_\_

Start of Decline: \_\_\_\_ . \_\_\_\_

### Pre-BD FEV1 Data and Percentiles: 1033

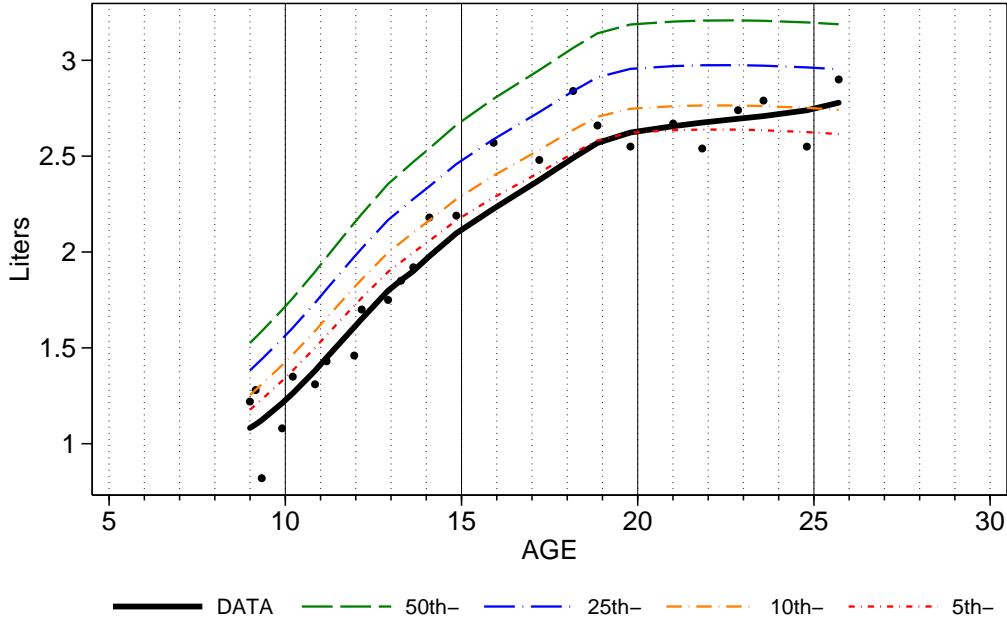

1033

**PATTERN OF GROWTH/DECLINE (Check One)**

- ( 1) Normal Growth
- ( 2) Normal Growth, Early Decline
- ( 3) Reduced Growth
- ( 4) Reduced Growth, Early Decline
- ( 9) Undetermined Pattern
- ( 8) Undetermined - not enough data

Maximum lung growth attained: ( 1) Yes ( 0) No

Plateau started: ( 2) No plateau ( 1) Yes ( 0) No

Decline started: ( 1) Yes ( 0) No

AGE AT each of the following periods (use '99' if N/A):

Maximum Lung Growth: \_\_\_\_ . \_\_\_\_

Start of Plateau: \_\_\_\_ . \_\_\_\_

Start of Decline: \_\_\_\_ . \_\_\_\_

### Pre-BD FEV1 Data and Percentiles: 1047

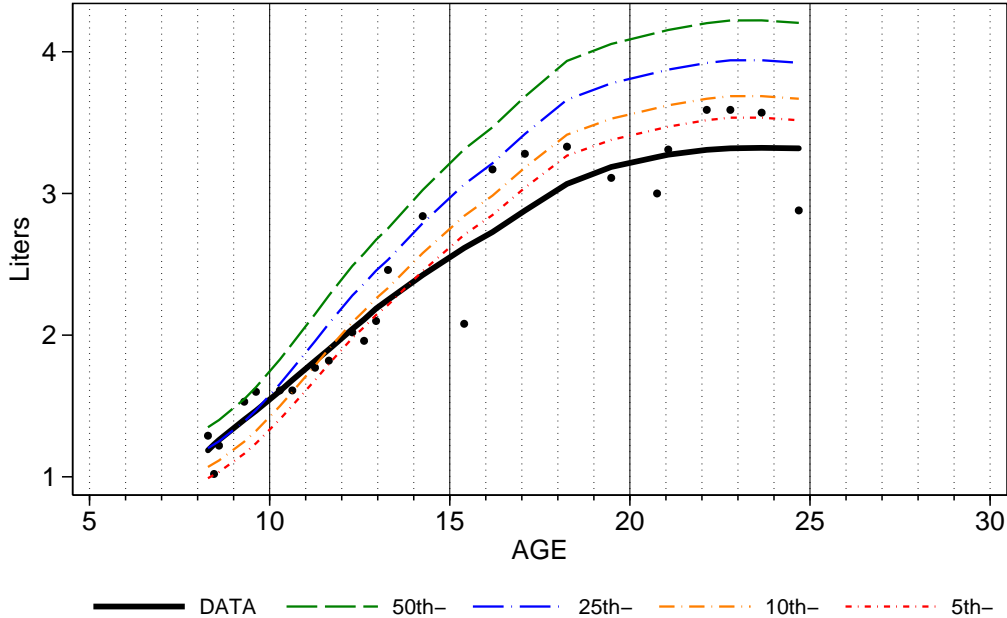

1047

**PATTERN OF GROWTH/DECLINE (Check One)**

- ( 1) Normal Growth
- ( 2) Normal Growth, Early Decline
- ( 3) Reduced Growth
- ( 4) Reduced Growth, Early Decline
- ( 9) Undetermined Pattern
- ( 8) Undetermined - not enough data

Maximum lung growth attained: ( 1) Yes ( 0) No

Plateau started: ( 2) No plateau ( 1) Yes ( 0) No

Decline started: ( 1) Yes ( 0) No

AGE AT each of the following periods (use '99' if N/A):

Maximum Lung Growth: \_\_\_\_ . \_\_\_\_

Start of Plateau: \_\_\_\_ . \_\_\_\_

Start of Decline: \_\_\_\_ . \_\_\_\_

### Pre-BD FEV1 Data and Percentiles: 1051

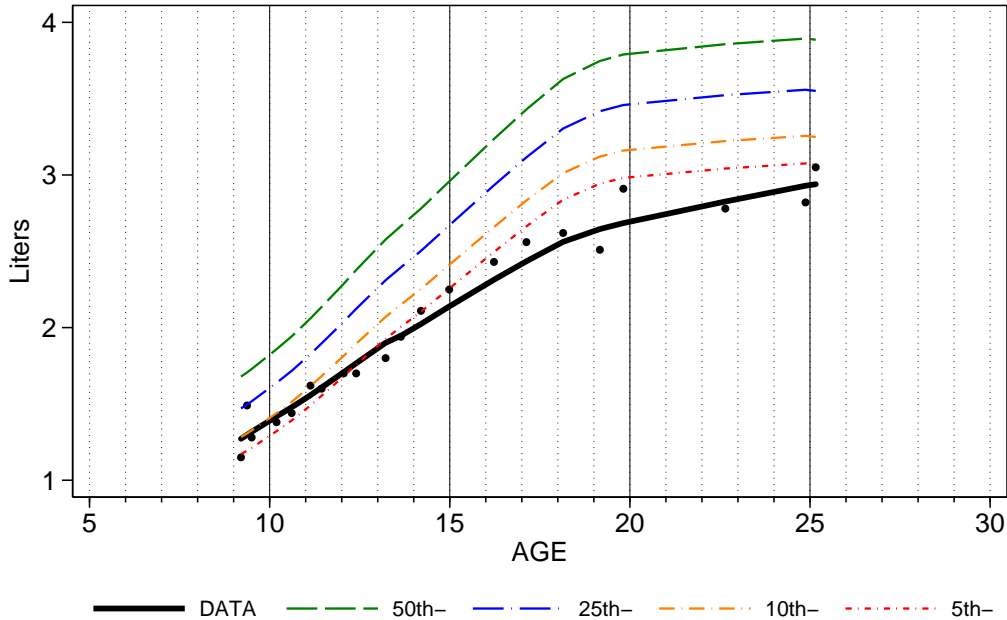

1051

**PATTERN OF GROWTH/DECLINE (Check One)**

- ( 1) Normal Growth
- ( 2) Normal Growth, Early Decline
- ( 3) Reduced Growth
- ( 4) Reduced Growth, Early Decline
- ( 9) Undetermined Pattern
- ( 8) Undetermined - not enough data

Maximum lung growth attained: ( 1) Yes ( 0) No

Plateau started: ( 2) No plateau ( 1) Yes ( 0) No

Decline started: ( 1) Yes ( 0) No

AGE AT each of the following periods (use '99' if N/A):

Maximum Lung Growth: \_\_\_\_ . \_\_\_\_

Start of Plateau: \_\_\_\_ . \_\_\_\_

Start of Decline: \_\_\_\_ . \_\_\_\_

### Pre-BD FEV1 Data and Percentiles: 1053

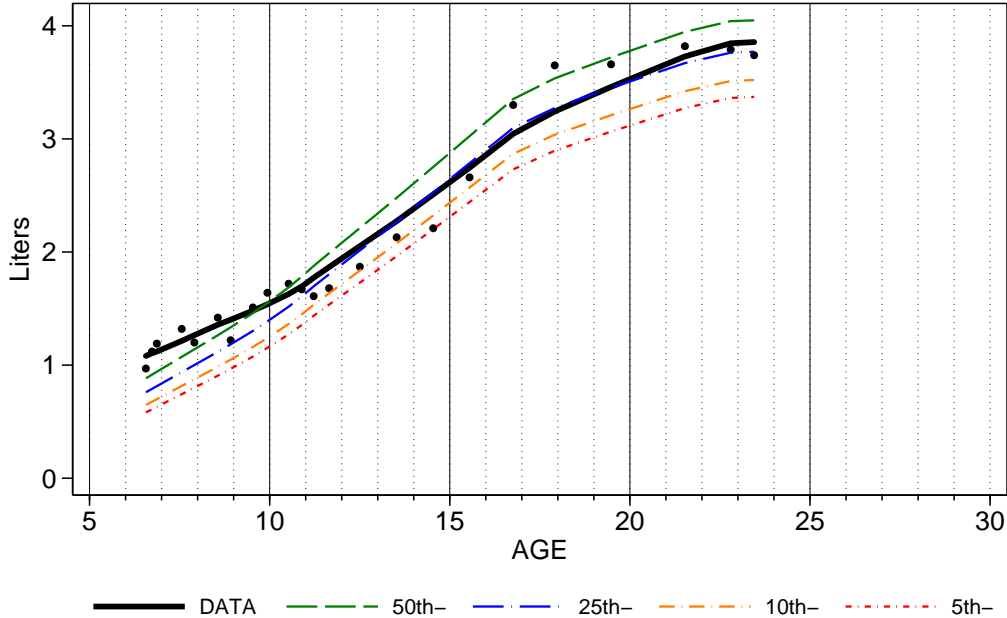

1053

**PATTERN OF GROWTH/DECLINE (Check One)**

- ( 1) Normal Growth
- ( 2) Normal Growth, Early Decline
- ( 3) Reduced Growth
- ( 4) Reduced Growth, Early Decline
- ( 9) Undetermined Pattern
- ( 8) Undetermined - not enough data

Maximum lung growth attained: ( 1) Yes ( 0) No

Plateau started: ( 2) No plateau ( 1) Yes ( 0) No

Decline started: ( 1) Yes ( 0) No

AGE AT each of the following periods (use '99' if N/A):

Maximum Lung Growth: \_\_\_\_ . \_\_\_\_

Start of Plateau: \_\_\_\_ . \_\_\_\_

Start of Decline: \_\_\_\_ . \_\_\_\_

### Pre-BD FEV1 Data and Percentiles: 1054

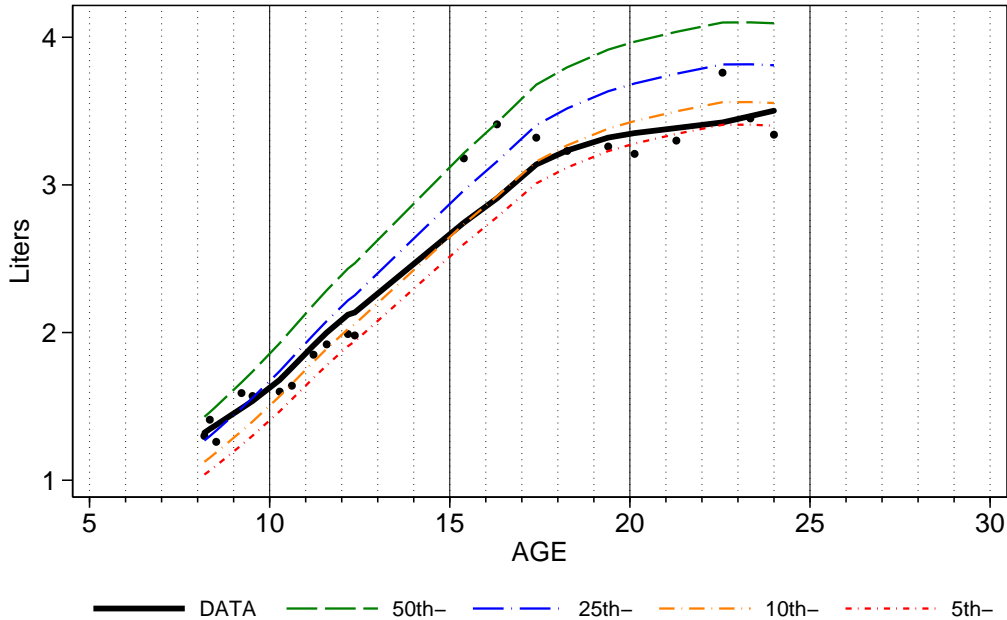

1054

**PATTERN OF GROWTH/DECLINE (Check One)**

- ( 1 ) Normal Growth
- ( 2 ) Normal Growth, Early Decline
- ( 3 ) Reduced Growth
- ( 4 ) Reduced Growth, Early Decline
- ( 9 ) Undetermined Pattern
- ( 8 ) Undetermined - not enough data

Maximum lung growth attained: ( 1 ) Yes ( 0 ) No

Plateau started: ( 2 ) No plateau ( 1 ) Yes ( 0 ) No

Decline started: ( 1 ) Yes ( 0 ) No

AGE AT each of the following periods (use '99' if N/A):

Maximum Lung Growth: \_\_\_\_ . \_\_\_\_

Start of Plateau: \_\_\_\_ . \_\_\_\_

Start of Decline: \_\_\_\_ . \_\_\_\_



### Pre-BD FEV1 Data and Percentiles: 1072

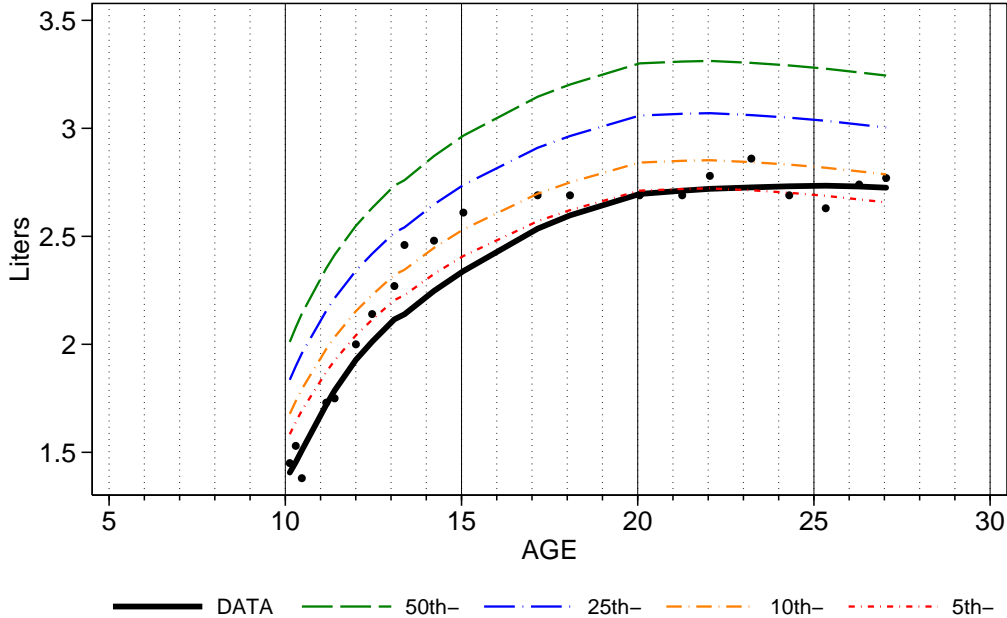

1072

**PATTERN OF GROWTH/DECLINE (Check One)**

- ( 1) Normal Growth
- ( 2) Normal Growth, Early Decline
- ( 3) Reduced Growth
- ( 4) Reduced Growth, Early Decline
- ( 9) Undetermined Pattern
- ( 8) Undetermined - not enough data

Maximum lung growth attained: ( 1) Yes ( 0) No

Plateau started: ( 2) No plateau ( 1) Yes ( 0) No

Decline started: ( 1) Yes ( 0) No

AGE AT each of the following periods (use '99' if N/A):

Maximum Lung Growth: \_\_\_\_ . \_\_\_\_

Start of Plateau: \_\_\_\_ . \_\_\_\_

Start of Decline: \_\_\_\_ . \_\_\_\_

### Pre-BD FEV1 Data and Percentiles: 1076

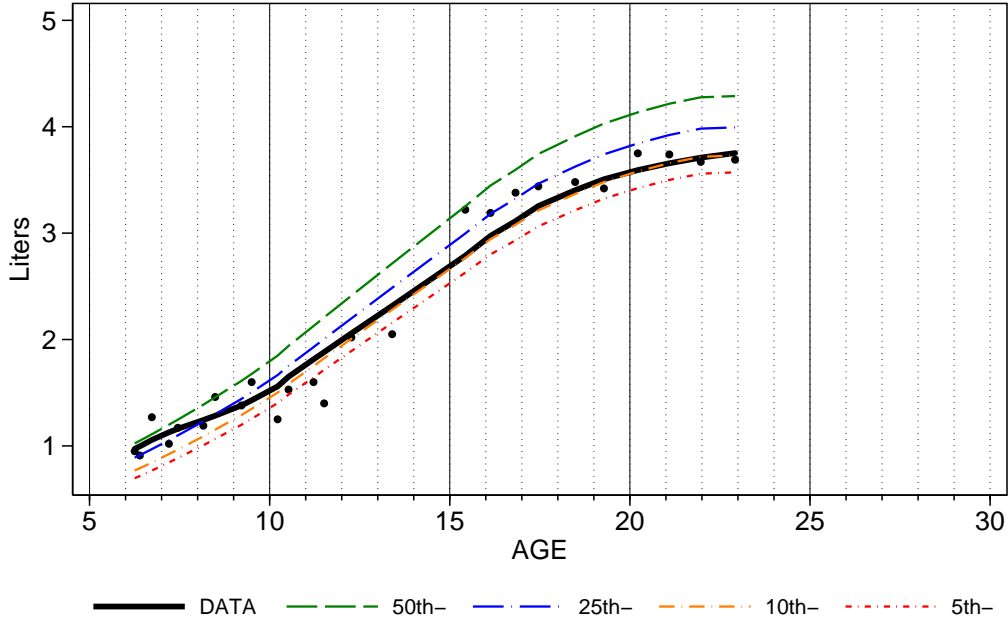

1076

**PATTERN OF GROWTH/DECLINE (Check One)**

- ( 1 ) Normal Growth
- ( 2 ) Normal Growth, Early Decline
- ( 3 ) Reduced Growth
- ( 4 ) Reduced Growth, Early Decline
- ( 9 ) Undetermined Pattern
- ( 8 ) Undetermined - not enough data

Maximum lung growth attained: ( 1 ) Yes ( 0 ) No

Plateau started: ( 2 ) No plateau ( 1 ) Yes ( 0 ) No

Decline started: ( 1 ) Yes ( 0 ) No

AGE AT each of the following periods (use '99' if N/A):

Maximum Lung Growth: \_\_\_\_ . \_\_\_\_

Start of Plateau: \_\_\_\_ . \_\_\_\_

Start of Decline: \_\_\_\_ . \_\_\_\_

### Pre-BD FEV1 Data and Percentiles: 1079

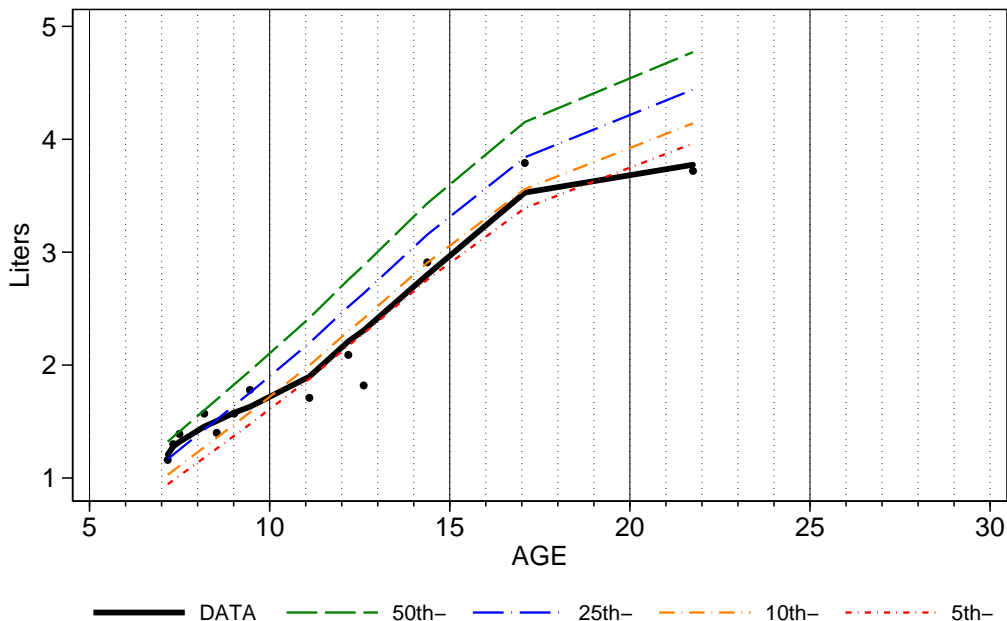

1079

**PATTERN OF GROWTH/DECLINE (Check One)**

- ( 1 ) Normal Growth
- ( 2 ) Normal Growth, Early Decline
- ( 3 ) Reduced Growth
- ( 4 ) Reduced Growth, Early Decline
- ( 9 ) Undetermined Pattern
- ( 8 ) Undetermined - not enough data

Maximum lung growth attained: ( 1 ) Yes ( 0 ) No

Plateau started: ( 2 ) No plateau ( 1 ) Yes ( 0 ) No

Decline started: ( 1 ) Yes ( 0 ) No

AGE AT each of the following periods (use '99' if N/A):

Maximum Lung Growth: \_\_\_\_ . \_\_\_\_

Start of Plateau: \_\_\_\_ . \_\_\_\_

Start of Decline: \_\_\_\_ . \_\_\_\_

### Pre-BD FEV1 Data and Percentiles: 1080

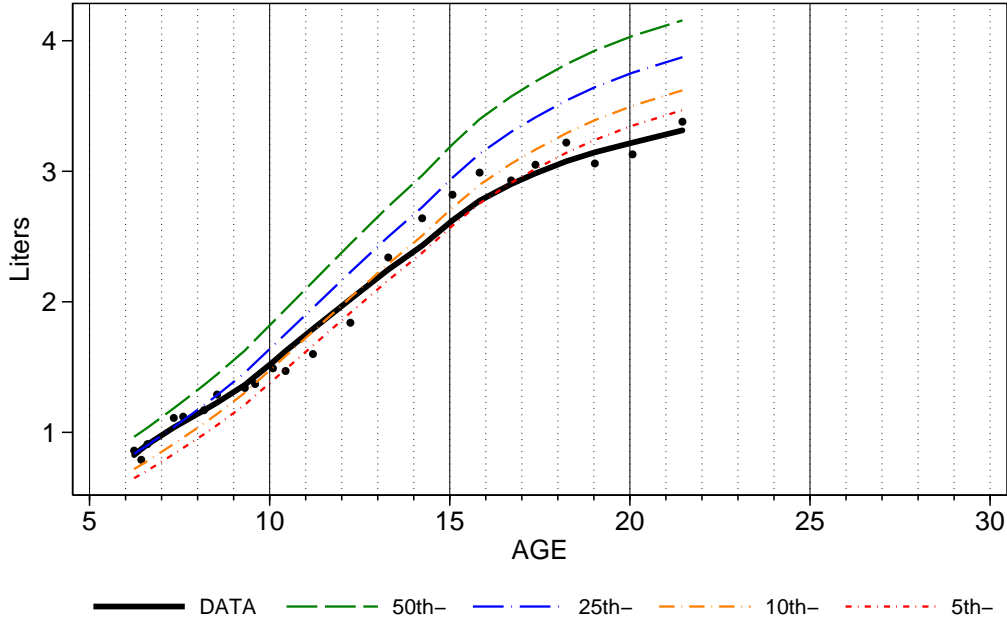

1080

**PATTERN OF GROWTH/DECLINE (Check One)**

- ( 1 ) Normal Growth
- ( 2 ) Normal Growth, Early Decline
- ( 3 ) Reduced Growth
- ( 4 ) Reduced Growth, Early Decline
- ( 9 ) Undetermined Pattern
- ( 8 ) Undetermined - not enough data

Maximum lung growth attained: ( 1 ) Yes ( 0 ) No

Plateau started: ( 2 ) No plateau ( 1 ) Yes ( 0 ) No

Decline started: ( 1 ) Yes ( 0 ) No

AGE AT each of the following periods (use '99' if N/A):

Maximum Lung Growth: \_\_\_\_ . \_\_\_\_

Start of Plateau: \_\_\_\_ . \_\_\_\_

Start of Decline: \_\_\_\_ . \_\_\_\_

### Pre-BD FEV1 Data and Percentiles: 1087

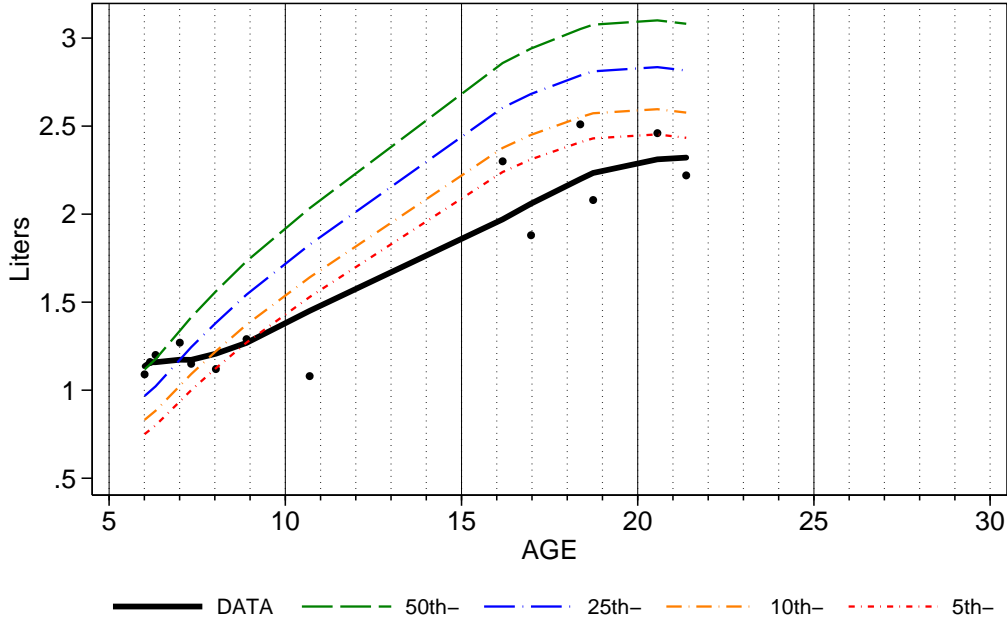

1087

**PATTERN OF GROWTH/DECLINE (Check One)**

- ( 1) Normal Growth
- ( 2) Normal Growth, Early Decline
- ( 3) Reduced Growth
- ( 4) Reduced Growth, Early Decline
- ( 9) Undetermined Pattern
- ( 8) Undetermined - not enough data

Maximum lung growth attained: ( 1) Yes ( 0) No

Plateau started: ( 2) No plateau ( 1) Yes ( 0) No

Decline started: ( 1) Yes ( 0) No

AGE AT each of the following periods (use '99' if N/A):

Maximum Lung Growth: \_\_\_\_ . \_\_\_\_

Start of Plateau: \_\_\_\_ . \_\_\_\_

Start of Decline: \_\_\_\_ . \_\_\_\_

### Pre-BD FEV1 Data and Percentiles: 1088

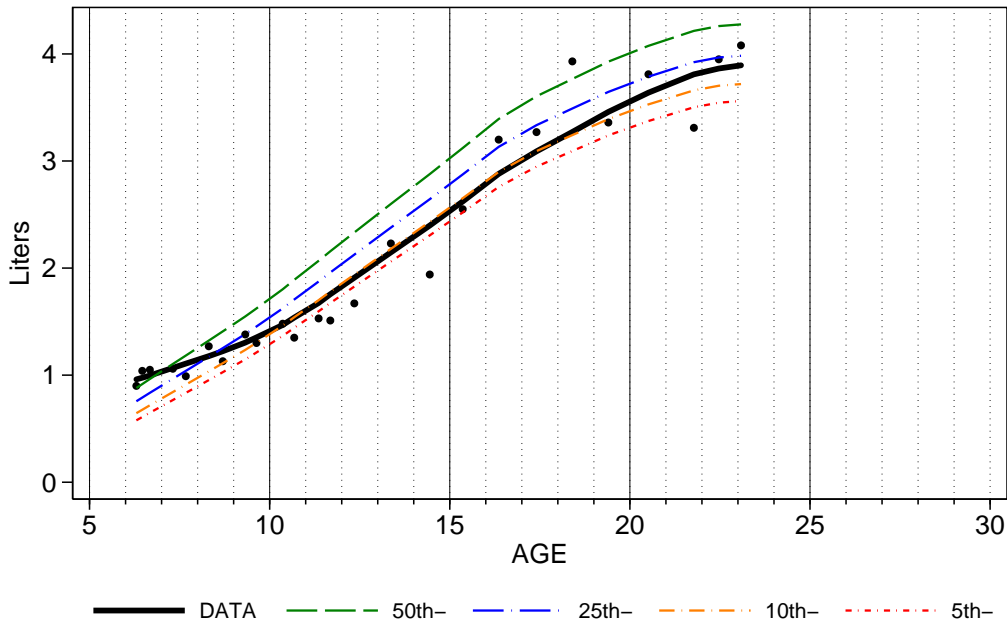

1088

**PATTERN OF GROWTH/DECLINE (Check One)**

- ( 1) Normal Growth
- ( 2) Normal Growth, Early Decline
- ( 3) Reduced Growth
- ( 4) Reduced Growth, Early Decline
- ( 9) Undetermined Pattern
- ( 8) Undetermined - not enough data

Maximum lung growth attained: ( 1) Yes ( 0) No

Plateau started: ( 2) No plateau ( 1) Yes ( 0) No

Decline started: ( 1) Yes ( 0) No

AGE AT each of the following periods (use '99' if N/A):

Maximum Lung Growth: \_\_\_\_ . \_\_\_\_

Start of Plateau: \_\_\_\_ . \_\_\_\_

Start of Decline: \_\_\_\_ . \_\_\_\_

### Pre-BD FEV1 Data and Percentiles: 1090

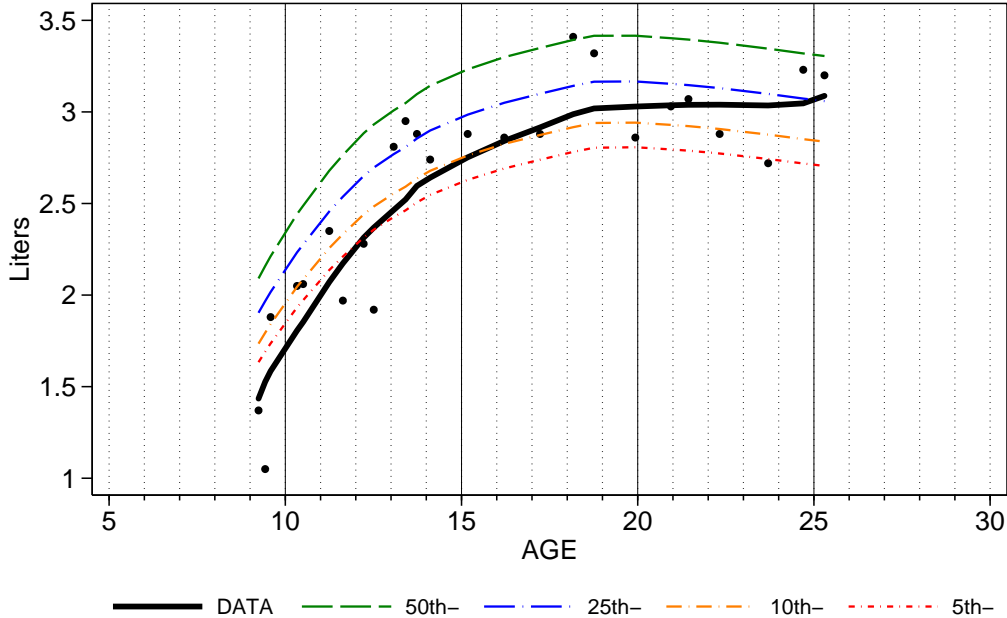

1090

**PATTERN OF GROWTH/DECLINE (Check One)**

- ( 1) Normal Growth
- ( 2) Normal Growth, Early Decline
- ( 3) Reduced Growth
- ( 4) Reduced Growth, Early Decline
- ( 9) Undetermined Pattern
- ( 8) Undetermined - not enough data

Maximum lung growth attained: ( 1) Yes ( 0) No

Plateau started: ( 2) No plateau ( 1) Yes ( 0) No

Decline started: ( 1) Yes ( 0) No

AGE AT each of the following periods (use '99' if N/A):

Maximum Lung Growth: \_\_\_\_ . \_\_\_\_

Start of Plateau: \_\_\_\_ . \_\_\_\_

Start of Decline: \_\_\_\_ . \_\_\_\_

### Pre-BD FEV1 Data and Percentiles: 1092

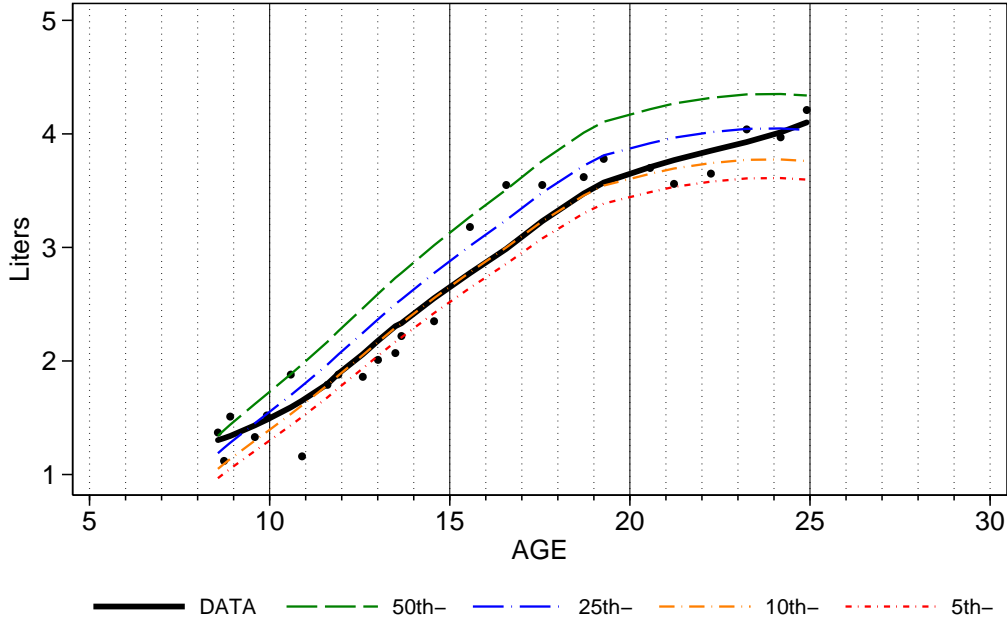

1092

**PATTERN OF GROWTH/DECLINE (Check One)**

- ( 1 ) Normal Growth
- ( 2 ) Normal Growth, Early Decline
- ( 3 ) Reduced Growth
- ( 4 ) Reduced Growth, Early Decline
- ( 9 ) Undetermined Pattern
- ( 8 ) Undetermined - not enough data

Maximum lung growth attained: ( 1 ) Yes ( 0 ) No

Plateau started: ( 2 ) No plateau ( 1 ) Yes ( 0 ) No

Decline started: ( 1 ) Yes ( 0 ) No

AGE AT each of the following periods (use '99' if N/A):

Maximum Lung Growth: \_\_\_\_ . \_\_\_\_

Start of Plateau: \_\_\_\_ . \_\_\_\_

Start of Decline: \_\_\_\_ . \_\_\_\_



### Pre-BD FEV1 Data and Percentiles: 1096

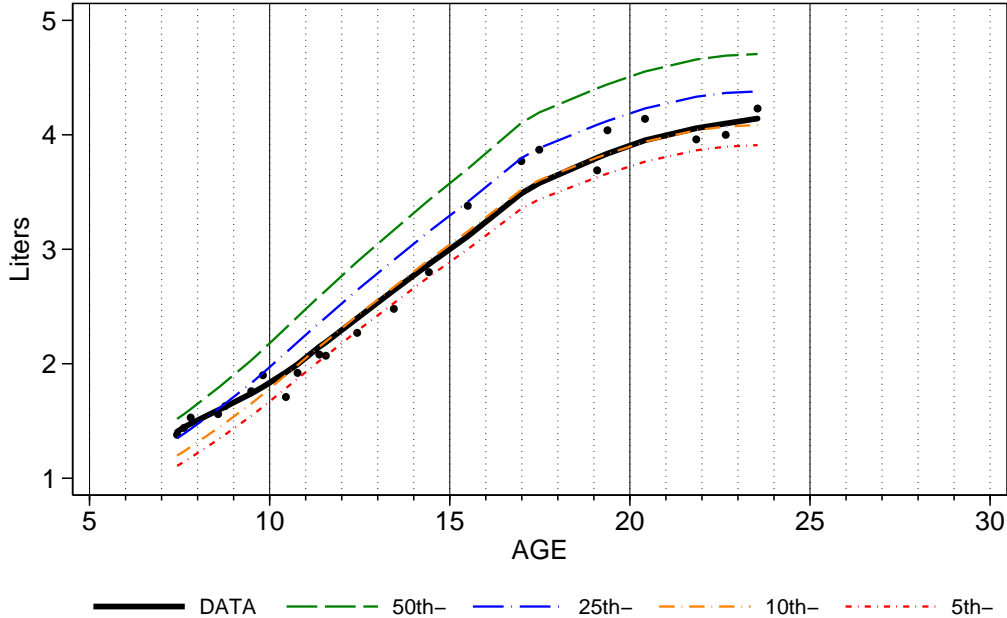

1096

**PATTERN OF GROWTH/DECLINE (Check One)**

- ( 1 ) Normal Growth
- ( 2 ) Normal Growth, Early Decline
- ( 3 ) Reduced Growth
- ( 4 ) Reduced Growth, Early Decline
- ( 9 ) Undetermined Pattern
- ( 8 ) Undetermined - not enough data

Maximum lung growth attained: ( 1 ) Yes ( 0 ) No

Plateau started: ( 2 ) No plateau ( 1 ) Yes ( 0 ) No

Decline started: ( 1 ) Yes ( 0 ) No

AGE AT each of the following periods (use '99' if N/A):

Maximum Lung Growth: \_\_\_\_ . \_\_\_\_

Start of Plateau: \_\_\_\_ . \_\_\_\_

Start of Decline: \_\_\_\_ . \_\_\_\_

### Pre-BD FEV1 Data and Percentiles: 1098

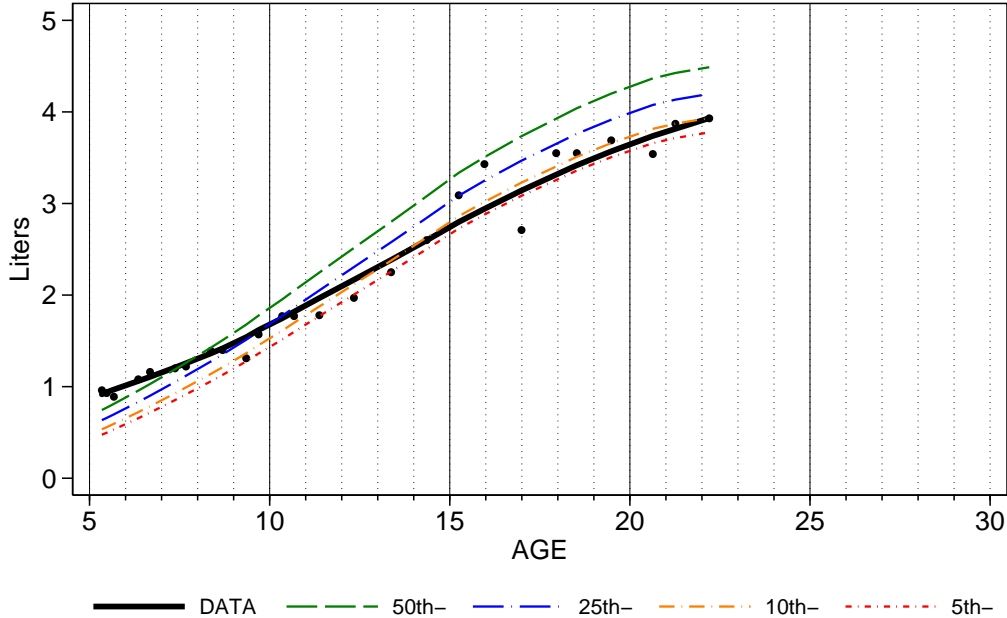

1098

**PATTERN OF GROWTH/DECLINE (Check One)**

- ( 1 ) Normal Growth
- ( 2 ) Normal Growth, Early Decline
- ( 3 ) Reduced Growth
- ( 4 ) Reduced Growth, Early Decline
- ( 9 ) Undetermined Pattern
- ( 8 ) Undetermined - not enough data

Maximum lung growth attained: ( 1 ) Yes ( 0 ) No

Plateau started: ( 2 ) No plateau ( 1 ) Yes ( 0 ) No

Decline started: ( 1 ) Yes ( 0 ) No

AGE AT each of the following periods (use '99' if N/A):

Maximum Lung Growth: \_\_\_\_ . \_\_\_\_

Start of Plateau: \_\_\_\_ . \_\_\_\_

Start of Decline: \_\_\_\_ . \_\_\_\_

### Pre-BD FEV1 Data and Percentiles: 1100

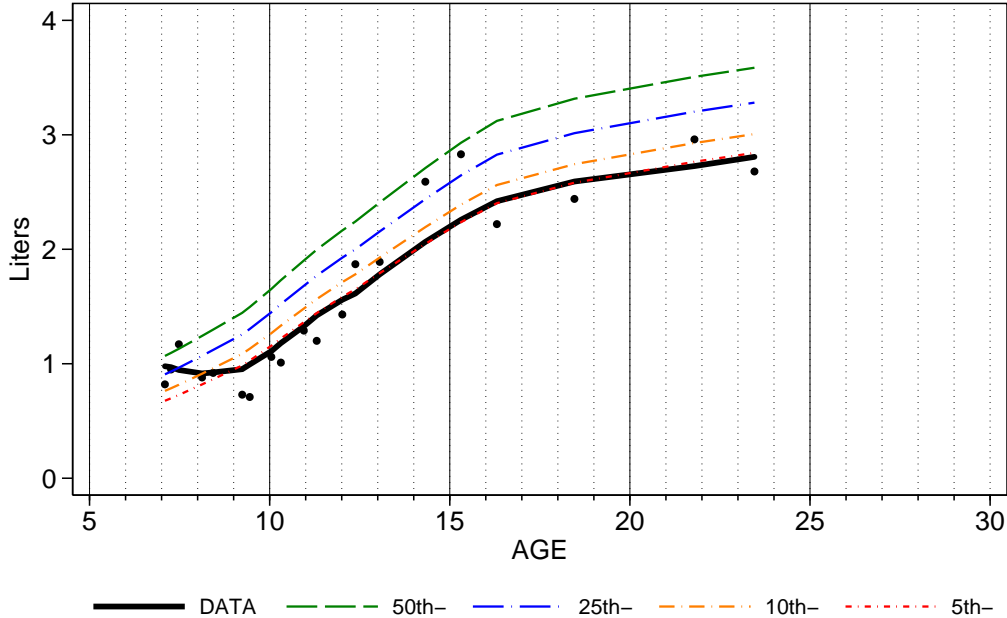

1100

**PATTERN OF GROWTH/DECLINE (Check One)**

- ( 1) Normal Growth
- ( 2) Normal Growth, Early Decline
- ( 3) Reduced Growth
- ( 4) Reduced Growth, Early Decline
- ( 9) Undetermined Pattern
- ( 8) Undetermined - not enough data

Maximum lung growth attained: ( 1) Yes ( 0) No

Plateau started: ( 2) No plateau ( 1) Yes ( 0) No

Decline started: ( 1) Yes ( 0) No

AGE AT each of the following periods (use '99' if N/A):

Maximum Lung Growth: \_\_\_\_ . \_\_\_\_

Start of Plateau: \_\_\_\_ . \_\_\_\_

Start of Decline: \_\_\_\_ . \_\_\_\_

### Pre-BD FEV1 Data and Percentiles: 1105

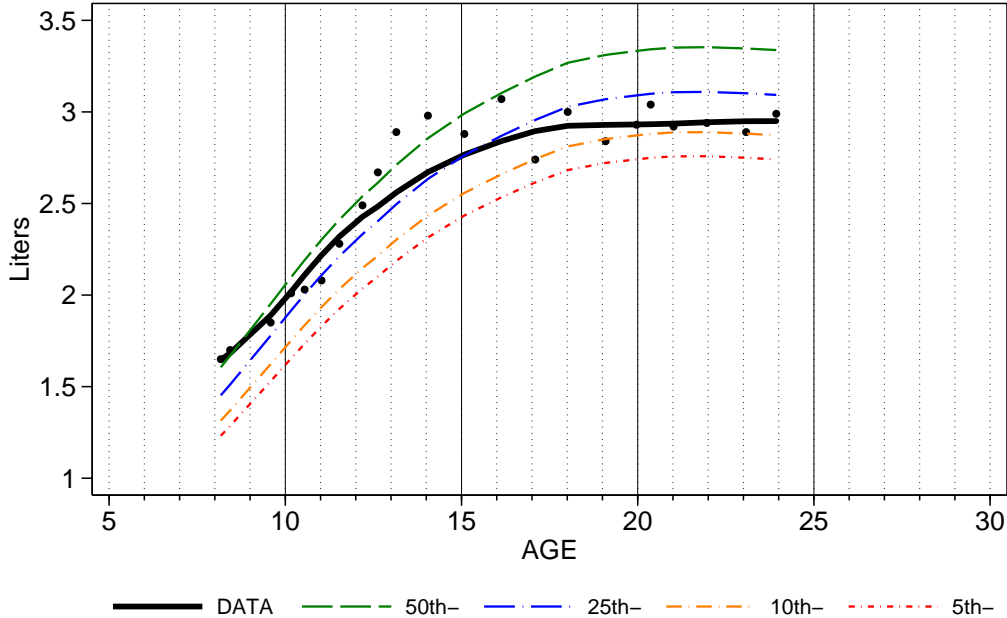

1105

**PATTERN OF GROWTH/DECLINE (Check One)**

- ( 1) Normal Growth
- ( 2) Normal Growth, Early Decline
- ( 3) Reduced Growth
- ( 4) Reduced Growth, Early Decline
- ( 9) Undetermined Pattern
- ( 8) Undetermined - not enough data

Maximum lung growth attained: ( 1) Yes ( 0) No

Plateau started: ( 2) No plateau ( 1) Yes ( 0) No

Decline started: ( 1) Yes ( 0) No

AGE AT each of the following periods (use '99' if N/A):

Maximum Lung Growth: \_\_\_\_ . \_\_\_\_

Start of Plateau: \_\_\_\_ . \_\_\_\_

Start of Decline: \_\_\_\_ . \_\_\_\_

### Pre-BD FEV1 Data and Percentiles: 1106

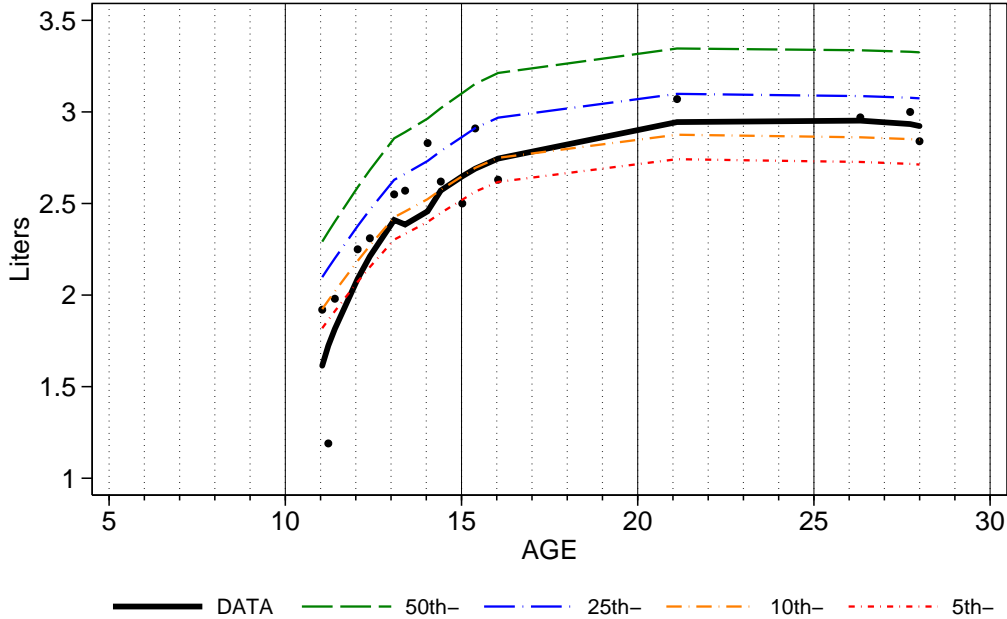

1106

**PATTERN OF GROWTH/DECLINE (Check One)**

- ( 1 ) Normal Growth
- ( 2 ) Normal Growth, Early Decline
- ( 3 ) Reduced Growth
- ( 4 ) Reduced Growth, Early Decline
- ( 9 ) Undetermined Pattern
- ( 8 ) Undetermined - not enough data

Maximum lung growth attained: ( 1 ) Yes ( 0 ) No

Plateau started: ( 2 ) No plateau ( 1 ) Yes ( 0 ) No

Decline started: ( 1 ) Yes ( 0 ) No

AGE AT each of the following periods (use '99' if N/A):

Maximum Lung Growth: \_\_\_\_ . \_\_\_\_

Start of Plateau: \_\_\_\_ . \_\_\_\_

Start of Decline: \_\_\_\_ . \_\_\_\_

### Pre-BD FEV1 Data and Percentiles: 1110

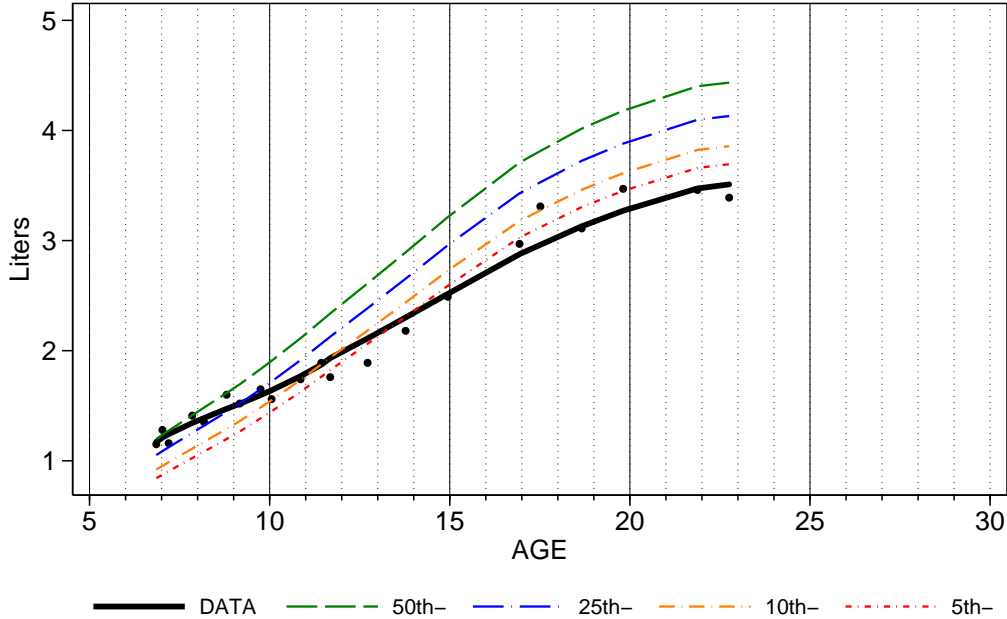

1110

**PATTERN OF GROWTH/DECLINE (Check One)**

- ( 1) Normal Growth
- ( 2) Normal Growth, Early Decline
- ( 3) Reduced Growth
- ( 4) Reduced Growth, Early Decline
- ( 9) Undetermined Pattern
- ( 8) Undetermined - not enough data

Maximum lung growth attained: ( 1) Yes ( 0) No

Plateau started: ( 2) No plateau ( 1) Yes ( 0) No

Decline started: ( 1) Yes ( 0) No

AGE AT each of the following periods (use '99' if N/A):

Maximum Lung Growth: \_\_\_\_ . \_\_\_\_

Start of Plateau: \_\_\_\_ . \_\_\_\_

Start of Decline: \_\_\_\_ . \_\_\_\_

### Pre-BD FEV1 Data and Percentiles: 1115

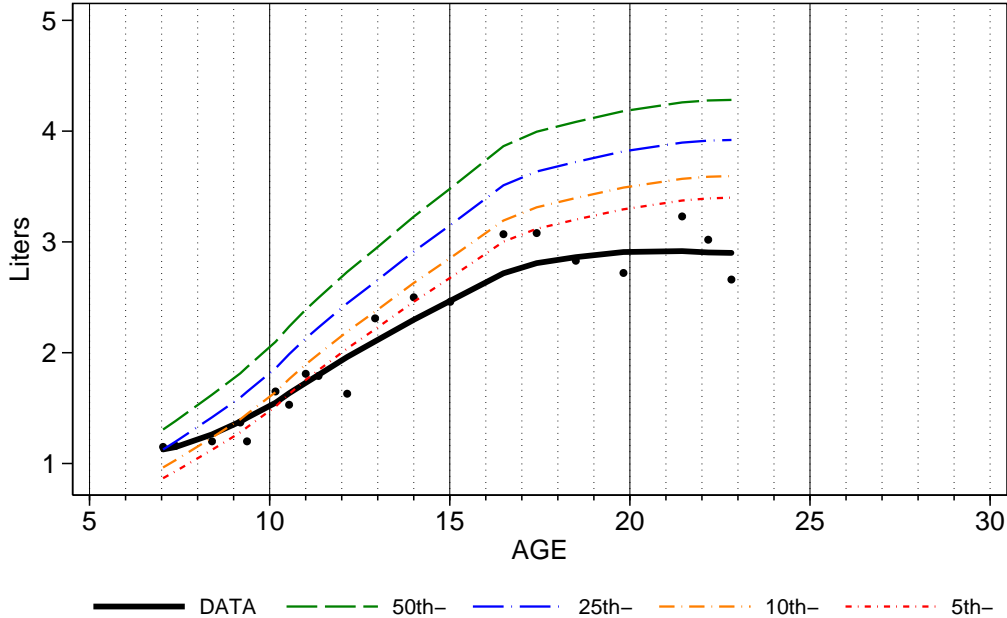

1115

**PATTERN OF GROWTH/DECLINE (Check One)**

- ( 1) Normal Growth
- ( 2) Normal Growth, Early Decline
- ( 3) Reduced Growth
- ( 4) Reduced Growth, Early Decline
- ( 9) Undetermined Pattern
- ( 8) Undetermined - not enough data

Maximum lung growth attained: ( 1) Yes ( 0) No

Plateau started: ( 2) No plateau ( 1) Yes ( 0) No

Decline started: ( 1) Yes ( 0) No

AGE AT each of the following periods (use '99' if N/A):

Maximum Lung Growth: \_\_\_\_ . \_\_\_\_

Start of Plateau: \_\_\_\_ . \_\_\_\_

Start of Decline: \_\_\_\_ . \_\_\_\_

### Pre-BD FEV1 Data and Percentiles: 1121

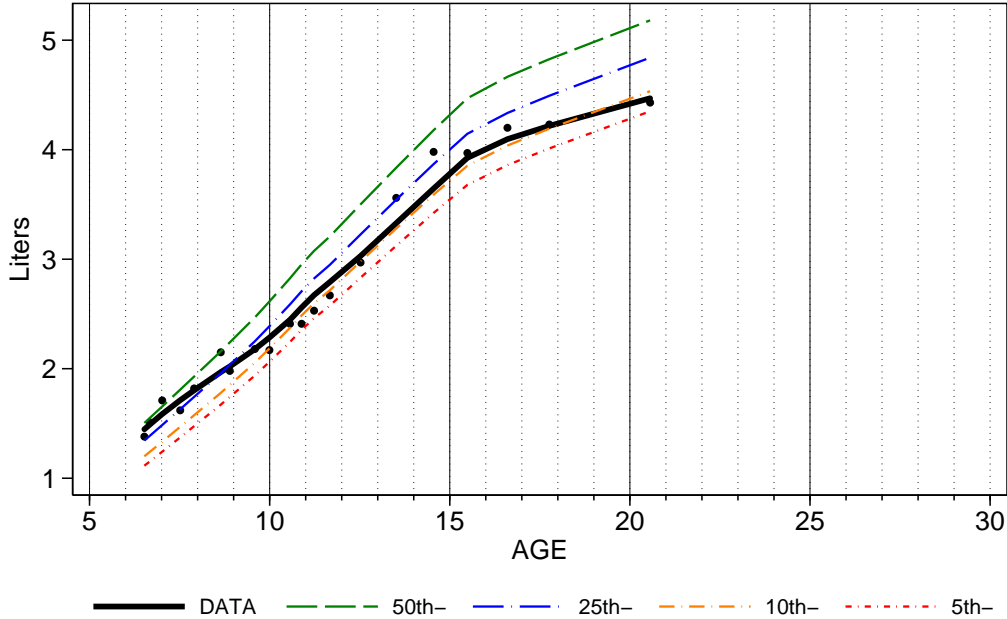

1121

**PATTERN OF GROWTH/DECLINE (Check One)**

- ( 1 ) Normal Growth
- ( 2 ) Normal Growth, Early Decline
- ( 3 ) Reduced Growth
- ( 4 ) Reduced Growth, Early Decline
- ( 9 ) Undetermined Pattern
- ( 8 ) Undetermined - not enough data

Maximum lung growth attained: ( 1 ) Yes ( 0 ) No

Plateau started: ( 2 ) No plateau ( 1 ) Yes ( 0 ) No

Decline started: ( 1 ) Yes ( 0 ) No

AGE AT each of the following periods (use '99' if N/A):

Maximum Lung Growth: \_\_\_\_ . \_\_\_\_

Start of Plateau: \_\_\_\_ . \_\_\_\_

Start of Decline: \_\_\_\_ . \_\_\_\_



### Pre-BD FEV1 Data and Percentiles: 1123

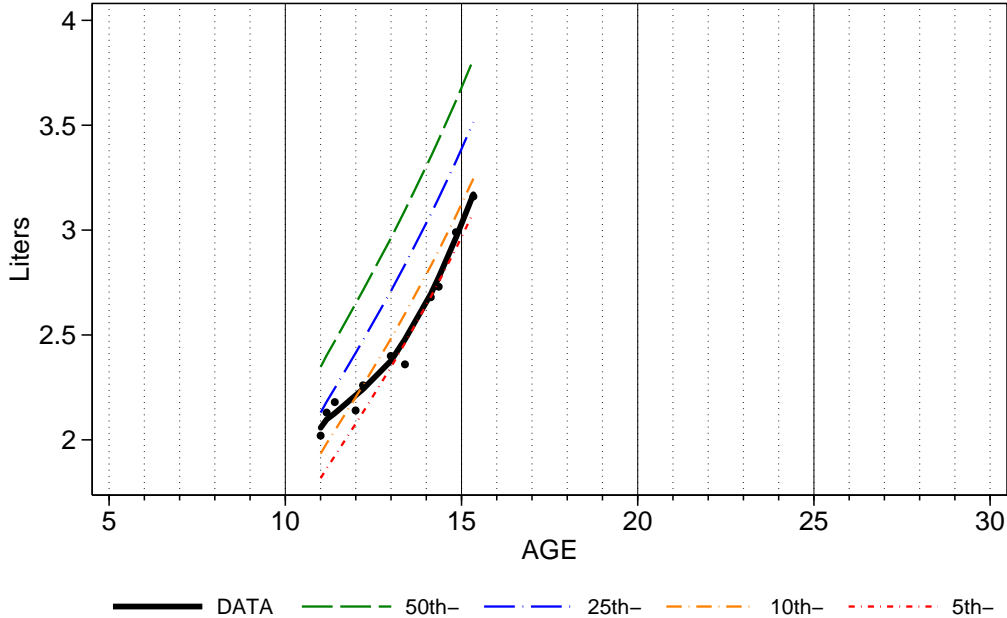

1123

**PATTERN OF GROWTH/DECLINE (Check One)**

- ( 1) Normal Growth
- ( 2) Normal Growth, Early Decline
- ( 3) Reduced Growth
- ( 4) Reduced Growth, Early Decline
- ( 9) Undetermined Pattern
- ( 8) Undetermined - not enough data

Maximum lung growth attained: ( 1) Yes ( 0) No

Plateau started: ( 2) No plateau ( 1) Yes ( 0) No

Decline started: ( 1) Yes ( 0) No

AGE AT each of the following periods (use '99' if N/A):

Maximum Lung Growth: \_\_\_\_ . \_\_\_\_

Start of Plateau: \_\_\_\_ . \_\_\_\_

Start of Decline: \_\_\_\_ . \_\_\_\_

### Pre-BD FEV1 Data and Percentiles: 1136

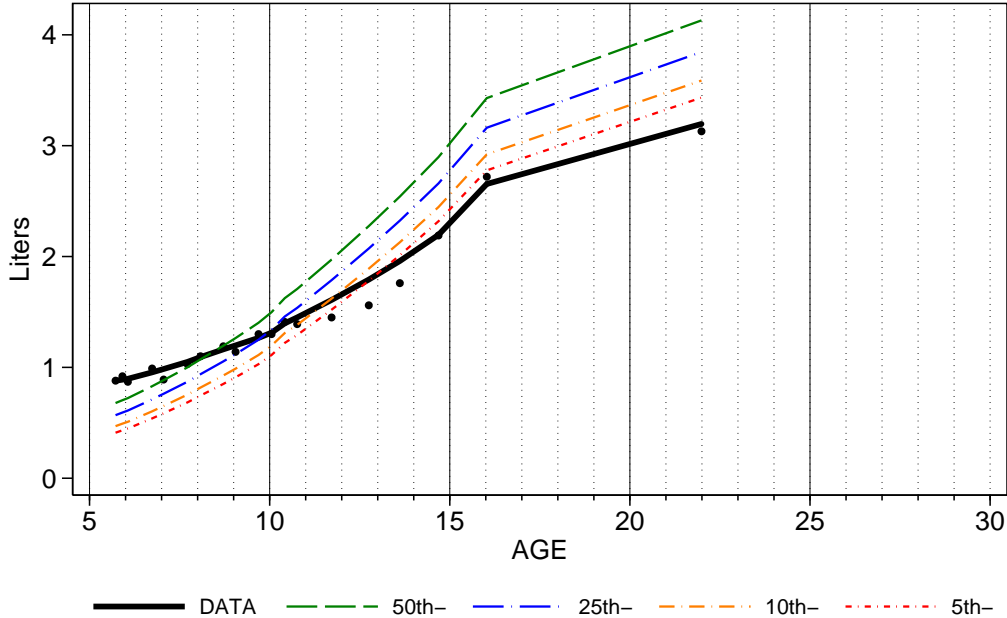

1136

**PATTERN OF GROWTH/DECLINE (Check One)**

- ( 1 ) Normal Growth
- ( 2 ) Normal Growth, Early Decline
- ( 3 ) Reduced Growth
- ( 4 ) Reduced Growth, Early Decline
- ( 9 ) Undetermined Pattern
- ( 8 ) Undetermined - not enough data

Maximum lung growth attained: ( 1 ) Yes ( 0 ) No

Plateau started: ( 2 ) No plateau ( 1 ) Yes ( 0 ) No

Decline started: ( 1 ) Yes ( 0 ) No

AGE AT each of the following periods (use '99' if N/A):

Maximum Lung Growth: \_\_\_\_ . \_\_\_\_

Start of Plateau: \_\_\_\_ . \_\_\_\_

Start of Decline: \_\_\_\_ . \_\_\_\_

### Pre-BD FEV1 Data and Percentiles: 1145

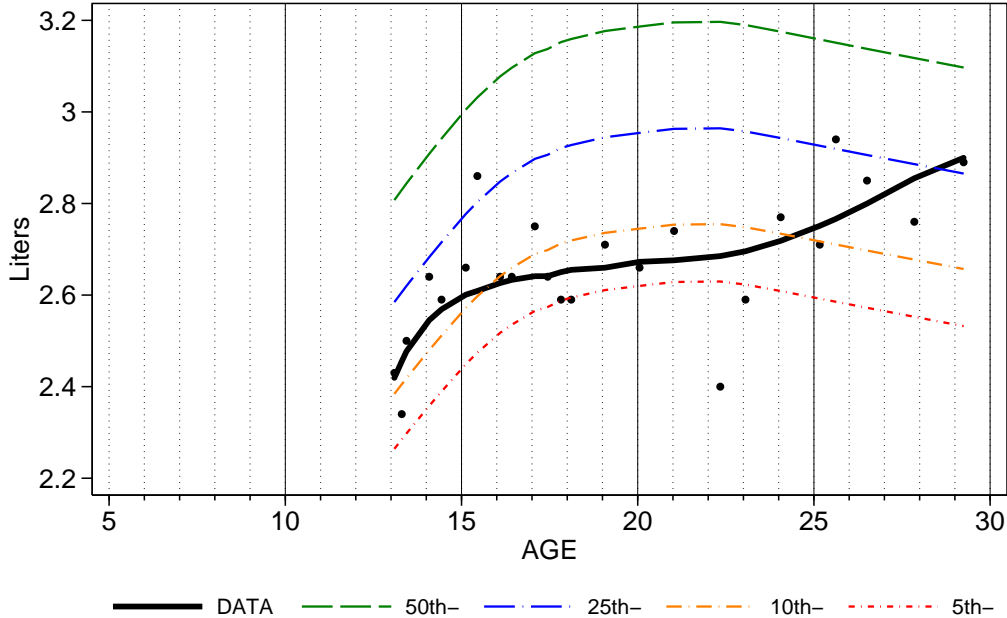

1145

**PATTERN OF GROWTH/DECLINE (Check One)**

- ( 1) Normal Growth
- ( 2) Normal Growth, Early Decline
- ( 3) Reduced Growth
- ( 4) Reduced Growth, Early Decline
- ( 9) Undetermined Pattern
- ( 8) Undetermined - not enough data

Maximum lung growth attained: ( 1) Yes ( 0) No

Plateau started: ( 2) No plateau ( 1) Yes ( 0) No

Decline started: ( 1) Yes ( 0) No

AGE AT each of the following periods (use '99' if N/A):

Maximum Lung Growth: \_\_\_\_ . \_\_\_\_

Start of Plateau: \_\_\_\_ . \_\_\_\_

Start of Decline: \_\_\_\_ . \_\_\_\_

### Pre-BD FEV1 Data and Percentiles: 1146

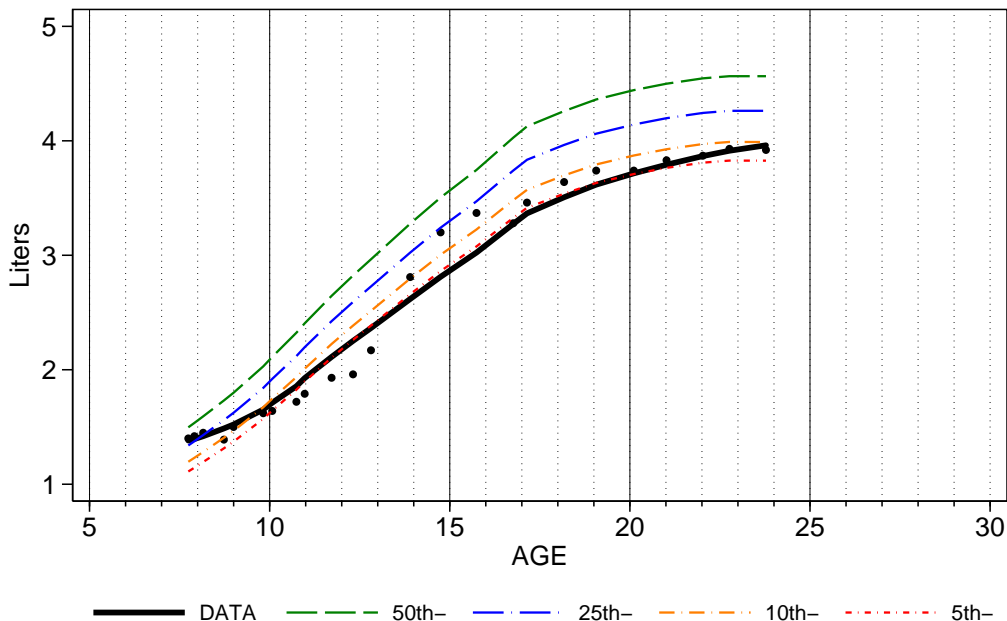

1146

**PATTERN OF GROWTH/DECLINE (Check One)**

- ( 1 ) Normal Growth
- ( 2 ) Normal Growth, Early Decline
- ( 3 ) Reduced Growth
- ( 4 ) Reduced Growth, Early Decline
- ( 9 ) Undetermined Pattern
- ( 8 ) Undetermined - not enough data

Maximum lung growth attained: ( 1 ) Yes ( 0 ) No

Plateau started: ( 2 ) No plateau ( 1 ) Yes ( 0 ) No

Decline started: ( 1 ) Yes ( 0 ) No

AGE AT each of the following periods (use '99' if N/A):

Maximum Lung Growth: \_\_\_\_ . \_\_\_\_

Start of Plateau: \_\_\_\_ . \_\_\_\_

Start of Decline: \_\_\_\_ . \_\_\_\_

### Pre-BD FEV1 Data and Percentiles: 1149

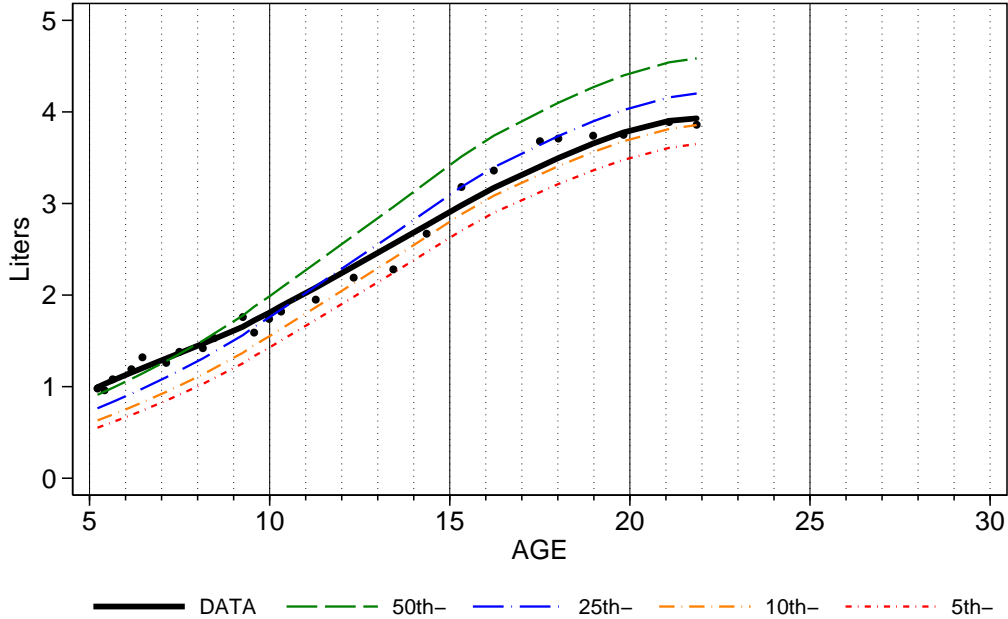

1149

**PATTERN OF GROWTH/DECLINE (Check One)**

- ( 1 ) Normal Growth
- ( 2 ) Normal Growth, Early Decline
- ( 3 ) Reduced Growth
- ( 4 ) Reduced Growth, Early Decline
- ( 9 ) Undetermined Pattern
- ( 8 ) Undetermined - not enough data

Maximum lung growth attained: ( 1 ) Yes ( 0 ) No

Plateau started: ( 2 ) No plateau ( 1 ) Yes ( 0 ) No

Decline started: ( 1 ) Yes ( 0 ) No

AGE AT each of the following periods (use '99' if N/A):

Maximum Lung Growth: \_\_\_\_ . \_\_\_\_

Start of Plateau: \_\_\_\_ . \_\_\_\_

Start of Decline: \_\_\_\_ . \_\_\_\_

### Pre-BD FEV1 Data and Percentiles: 1154

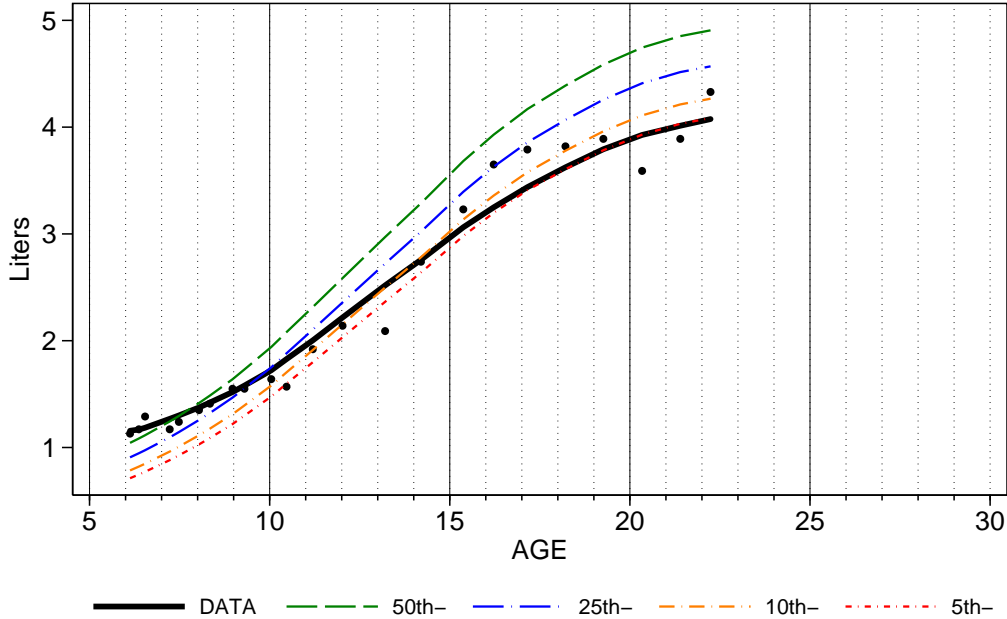

1154

**PATTERN OF GROWTH/DECLINE (Check One)**

- ( 1 ) Normal Growth
- ( 2 ) Normal Growth, Early Decline
- ( 3 ) Reduced Growth
- ( 4 ) Reduced Growth, Early Decline
- ( 9 ) Undetermined Pattern
- ( 8 ) Undetermined - not enough data

Maximum lung growth attained: ( 1 ) Yes ( 0 ) No

Plateau started: ( 2 ) No plateau ( 1 ) Yes ( 0 ) No

Decline started: ( 1 ) Yes ( 0 ) No

AGE AT each of the following periods (use '99' if N/A):

Maximum Lung Growth: \_\_\_\_ . \_\_\_\_

Start of Plateau: \_\_\_\_ . \_\_\_\_

Start of Decline: \_\_\_\_ . \_\_\_\_

### Pre-BD FEV1 Data and Percentiles: 1156

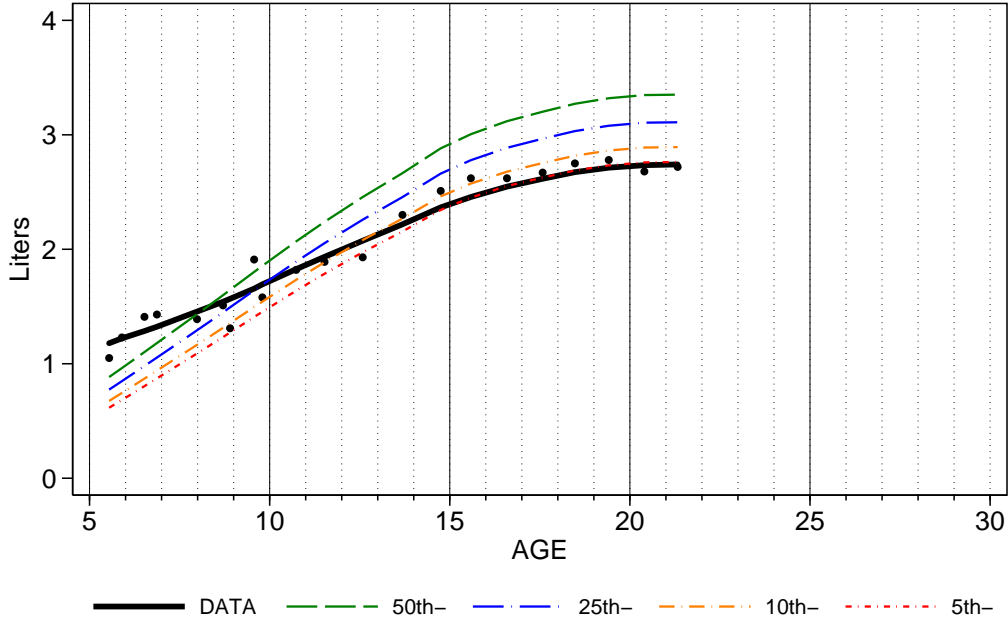

1156

**PATTERN OF GROWTH/DECLINE (Check One)**

- ( 1 ) Normal Growth
- ( 2 ) Normal Growth, Early Decline
- ( 3 ) Reduced Growth
- ( 4 ) Reduced Growth, Early Decline
- ( 9 ) Undetermined Pattern
- ( 8 ) Undetermined - not enough data

Maximum lung growth attained: ( 1 ) Yes ( 0 ) No

Plateau started: ( 2 ) No plateau ( 1 ) Yes ( 0 ) No

Decline started: ( 1 ) Yes ( 0 ) No

AGE AT each of the following periods (use '99' if N/A):

Maximum Lung Growth: \_\_\_\_ . \_\_\_\_

Start of Plateau: \_\_\_\_ . \_\_\_\_

Start of Decline: \_\_\_\_ . \_\_\_\_

### Pre-BD FEV1 Data and Percentiles: 1157

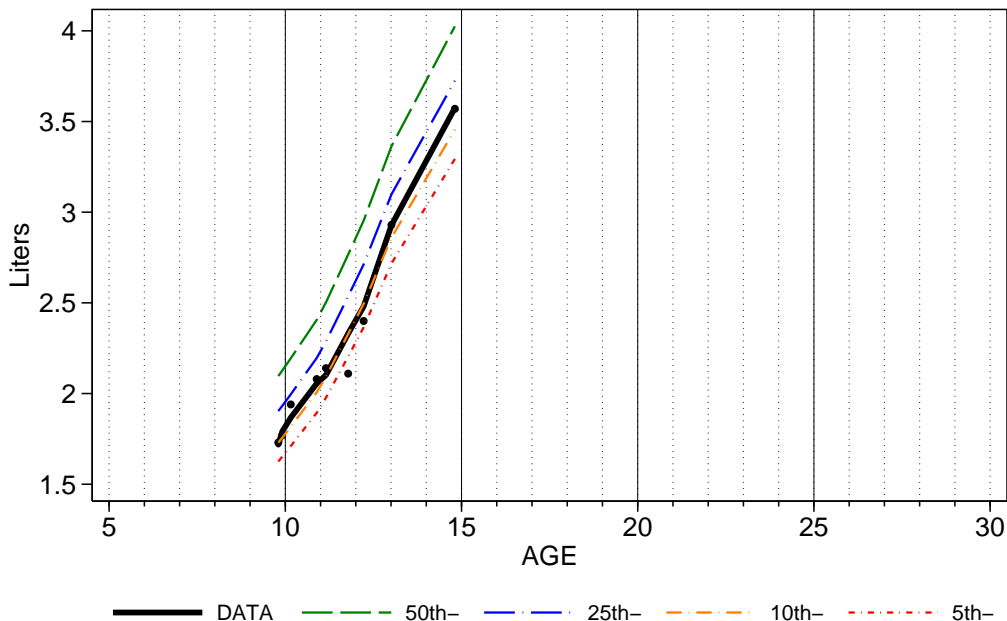

1157

**PATTERN OF GROWTH/DECLINE (Check One)**

- ( 1 ) Normal Growth
- ( 2 ) Normal Growth, Early Decline
- ( 3 ) Reduced Growth
- ( 4 ) Reduced Growth, Early Decline
- ( 9 ) Undetermined Pattern
- ( 8 ) Undetermined - not enough data

Maximum lung growth attained: ( 1 ) Yes ( 0 ) No

Plateau started: ( 2 ) No plateau ( 1 ) Yes ( 0 ) No

Decline started: ( 1 ) Yes ( 0 ) No

AGE AT each of the following periods (use '99' if N/A):

Maximum Lung Growth: \_\_\_\_ . \_\_\_\_

Start of Plateau: \_\_\_\_ . \_\_\_\_

Start of Decline: \_\_\_\_ . \_\_\_\_



### Pre-BD FEV1 Data and Percentiles: 1158

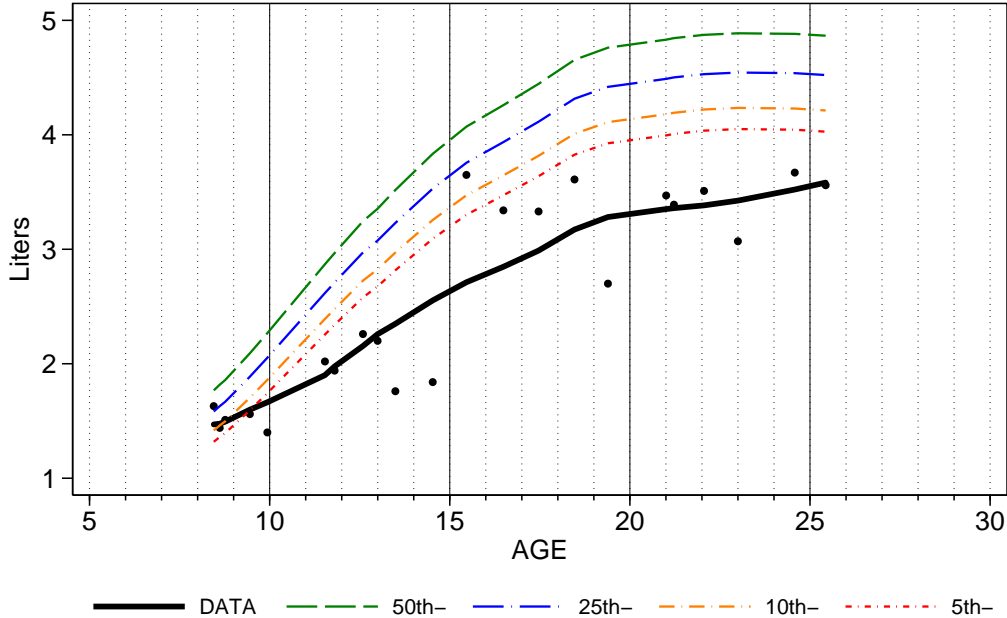

1158

**PATTERN OF GROWTH/DECLINE (Check One)**

- ( 1) Normal Growth
- ( 2) Normal Growth, Early Decline
- ( 3) Reduced Growth
- ( 4) Reduced Growth, Early Decline
- ( 9) Undetermined Pattern
- ( 8) Undetermined - not enough data

Maximum lung growth attained: ( 1) Yes ( 0) No

Plateau started: ( 2) No plateau ( 1) Yes ( 0) No

Decline started: ( 1) Yes ( 0) No

AGE AT each of the following periods (use '99' if N/A):

Maximum Lung Growth: \_\_\_\_ . \_\_\_\_

Start of Plateau: \_\_\_\_ . \_\_\_\_

Start of Decline: \_\_\_\_ . \_\_\_\_

### Pre-BD FEV1 Data and Percentiles: 1161

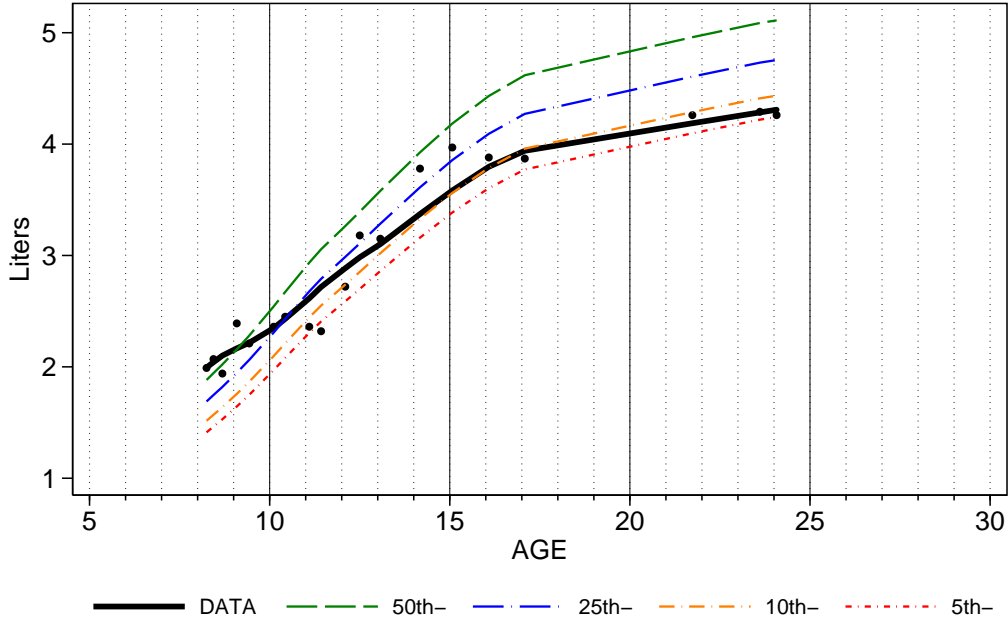

1161

**PATTERN OF GROWTH/DECLINE (Check One)**

- ( 1) Normal Growth
- ( 2) Normal Growth, Early Decline
- ( 3) Reduced Growth
- ( 4) Reduced Growth, Early Decline
- ( 9) Undetermined Pattern
- ( 8) Undetermined - not enough data

Maximum lung growth attained: ( 1) Yes ( 0) No

Plateau started: ( 2) No plateau ( 1) Yes ( 0) No

Decline started: ( 1) Yes ( 0) No

AGE AT each of the following periods (use '99' if N/A):

Maximum Lung Growth: \_\_\_\_ . \_\_\_\_

Start of Plateau: \_\_\_\_ . \_\_\_\_

Start of Decline: \_\_\_\_ . \_\_\_\_

### Pre-BD FEV1 Data and Percentiles: 1162

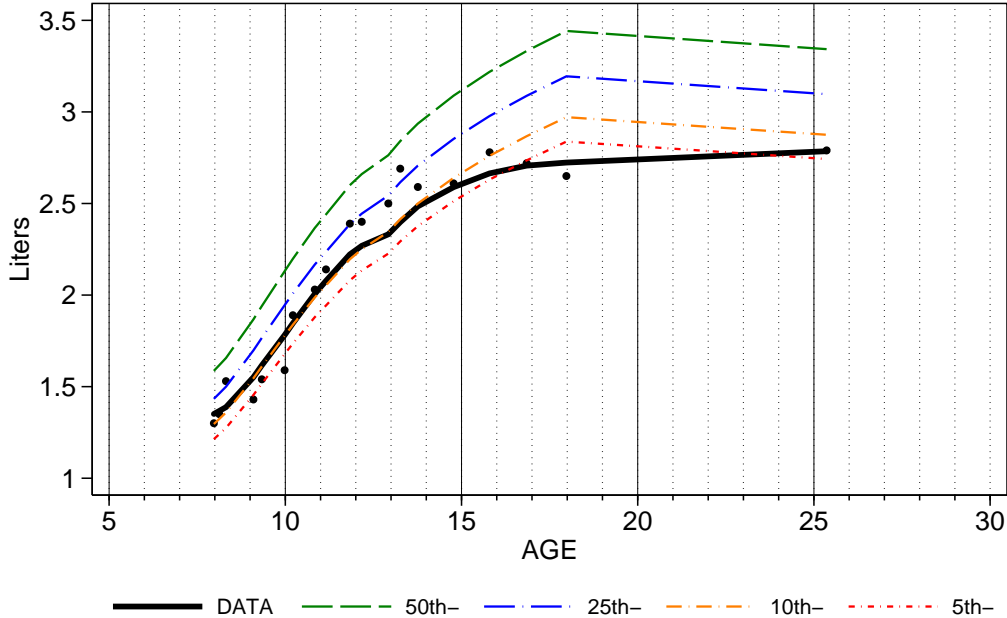

1162

**PATTERN OF GROWTH/DECLINE (Check One)**

- ( 1 ) Normal Growth
- ( 2 ) Normal Growth, Early Decline
- ( 3 ) Reduced Growth
- ( 4 ) Reduced Growth, Early Decline
- ( 9 ) Undetermined Pattern
- ( 8 ) Undetermined - not enough data

Maximum lung growth attained: ( 1 ) Yes ( 0 ) No

Plateau started: ( 2 ) No plateau ( 1 ) Yes ( 0 ) No

Decline started: ( 1 ) Yes ( 0 ) No

AGE AT each of the following periods (use '99' if N/A):

Maximum Lung Growth: \_\_\_\_ . \_\_\_\_

Start of Plateau: \_\_\_\_ . \_\_\_\_

Start of Decline: \_\_\_\_ . \_\_\_\_

### Pre-BD FEV1 Data and Percentiles: 1163

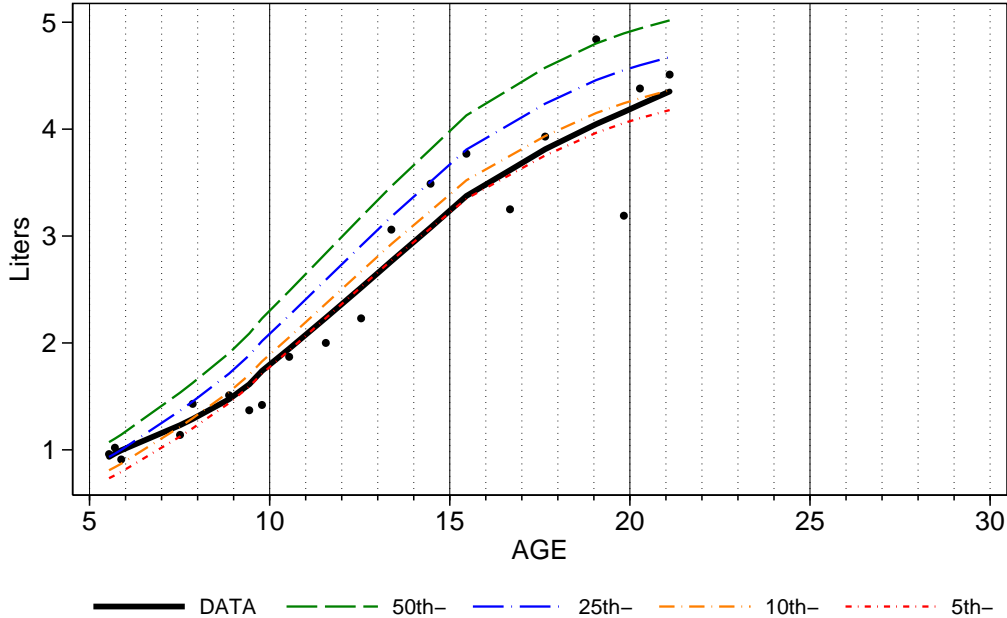

1163

**PATTERN OF GROWTH/DECLINE (Check One)**

- ( 1 ) Normal Growth
- ( 2 ) Normal Growth, Early Decline
- ( 3 ) Reduced Growth
- ( 4 ) Reduced Growth, Early Decline
- ( 9 ) Undetermined Pattern
- ( 8 ) Undetermined - not enough data

Maximum lung growth attained: ( 1 ) Yes ( 0 ) No

Plateau started: ( 2 ) No plateau ( 1 ) Yes ( 0 ) No

Decline started: ( 1 ) Yes ( 0 ) No

AGE AT each of the following periods (use '99' if N/A):

Maximum Lung Growth: \_\_\_\_ . \_\_\_\_

Start of Plateau: \_\_\_\_ . \_\_\_\_

Start of Decline: \_\_\_\_ . \_\_\_\_

### Pre-BD FEV1 Data and Percentiles: 1169

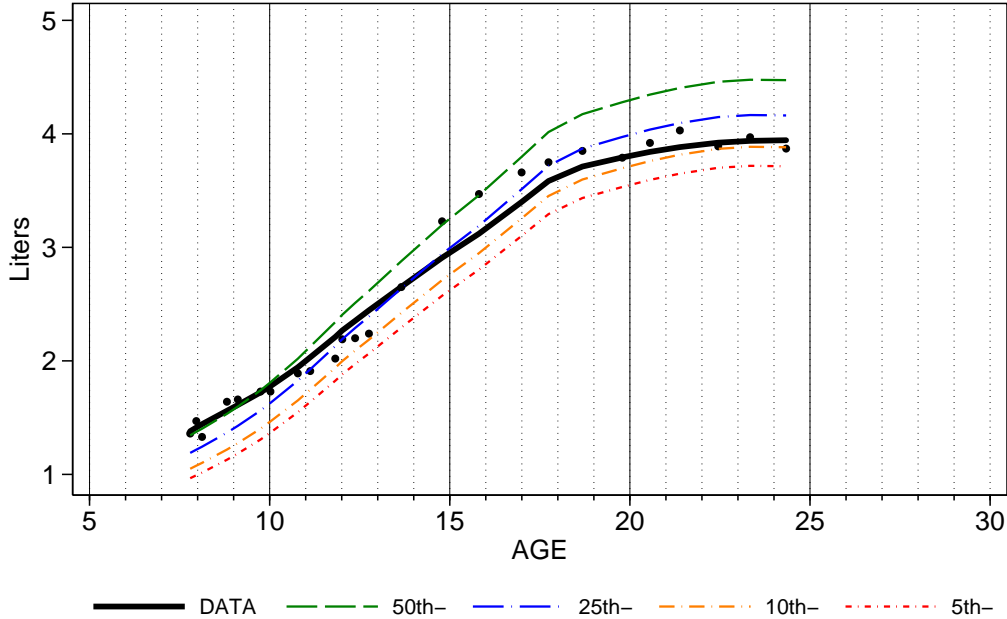

1169

**PATTERN OF GROWTH/DECLINE (Check One)**

- ( 1 ) Normal Growth
- ( 2 ) Normal Growth, Early Decline
- ( 3 ) Reduced Growth
- ( 4 ) Reduced Growth, Early Decline
- ( 9 ) Undetermined Pattern
- ( 8 ) Undetermined - not enough data

Maximum lung growth attained: ( 1 ) Yes ( 0 ) No

Plateau started: ( 2 ) No plateau ( 1 ) Yes ( 0 ) No

Decline started: ( 1 ) Yes ( 0 ) No

AGE AT each of the following periods (use '99' if N/A):

Maximum Lung Growth: \_\_\_\_ . \_\_\_\_

Start of Plateau: \_\_\_\_ . \_\_\_\_

Start of Decline: \_\_\_\_ . \_\_\_\_

### Pre-BD FEV1 Data and Percentiles: 1172

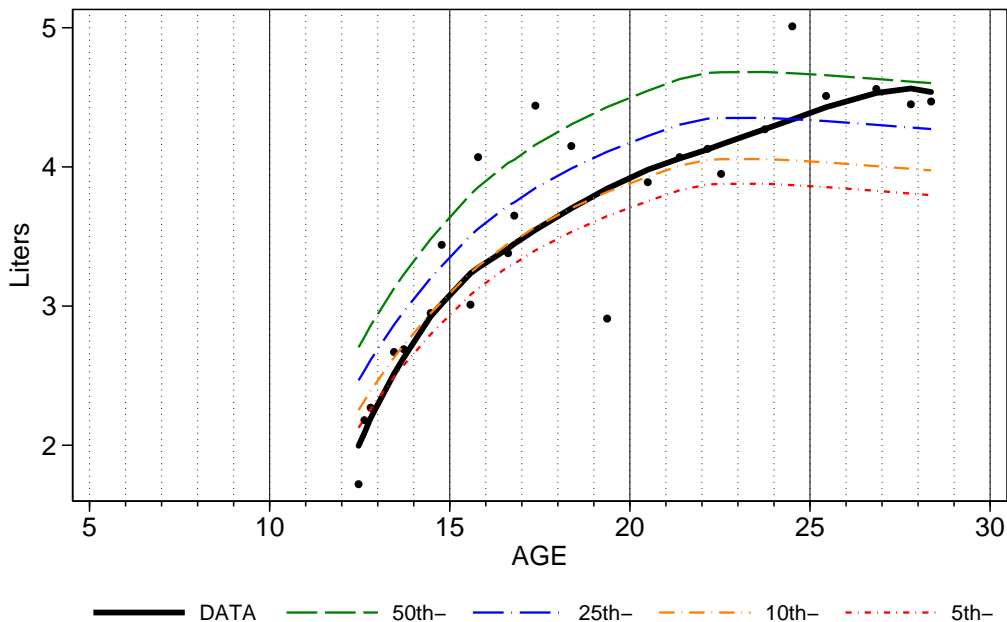

1172

**PATTERN OF GROWTH/DECLINE (Check One)**

- ( 1) Normal Growth
- ( 2) Normal Growth, Early Decline
- ( 3) Reduced Growth
- ( 4) Reduced Growth, Early Decline
- ( 9) Undetermined Pattern
- ( 8) Undetermined - not enough data

Maximum lung growth attained: ( 1) Yes ( 0) No

Plateau started: ( 2) No plateau ( 1) Yes ( 0) No

Decline started: ( 1) Yes ( 0) No

AGE AT each of the following periods (use '99' if N/A):

Maximum Lung Growth: \_\_\_\_ . \_\_\_\_

Start of Plateau: \_\_\_\_ . \_\_\_\_

Start of Decline: \_\_\_\_ . \_\_\_\_

### Pre-BD FEV1 Data and Percentiles: 1179

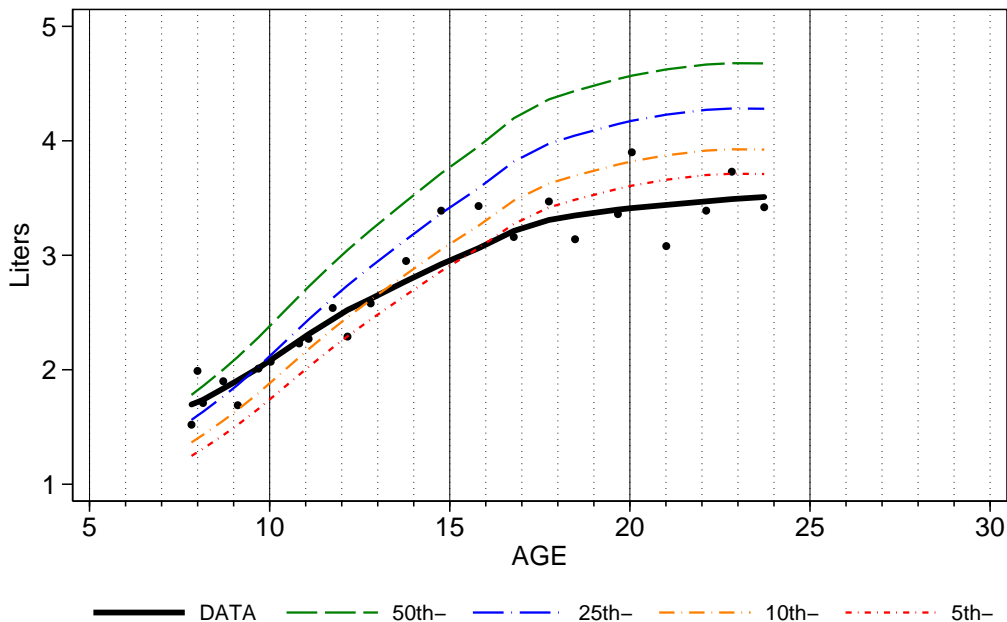

1179

**PATTERN OF GROWTH/DECLINE (Check One)**

- ( 1) Normal Growth
- ( 2) Normal Growth, Early Decline
- ( 3) Reduced Growth
- ( 4) Reduced Growth, Early Decline
- ( 9) Undetermined Pattern
- ( 8) Undetermined - not enough data

Maximum lung growth attained: ( 1) Yes ( 0) No

Plateau started: ( 2) No plateau ( 1) Yes ( 0) No

Decline started: ( 1) Yes ( 0) No

AGE AT each of the following periods (use '99' if N/A):

Maximum Lung Growth: \_\_\_\_ . \_\_\_\_

Start of Plateau: \_\_\_\_ . \_\_\_\_

Start of Decline: \_\_\_\_ . \_\_\_\_

### Pre-BD FEV1 Data and Percentiles: 1180

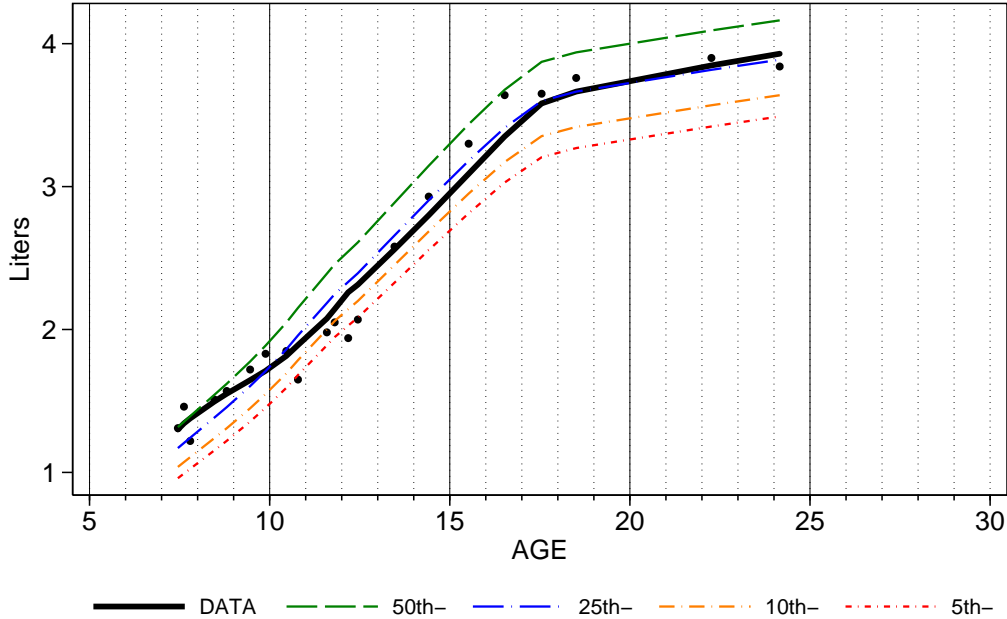

1180

**PATTERN OF GROWTH/DECLINE (Check One)**

- ( 1 ) Normal Growth
- ( 2 ) Normal Growth, Early Decline
- ( 3 ) Reduced Growth
- ( 4 ) Reduced Growth, Early Decline
- ( 9 ) Undetermined Pattern
- ( 8 ) Undetermined - not enough data

Maximum lung growth attained: ( 1 ) Yes ( 0 ) No

Plateau started: ( 2 ) No plateau ( 1 ) Yes ( 0 ) No

Decline started: ( 1 ) Yes ( 0 ) No

AGE AT each of the following periods (use '99' if N/A):

Maximum Lung Growth: \_\_\_\_ . \_\_\_\_

Start of Plateau: \_\_\_\_ . \_\_\_\_

Start of Decline: \_\_\_\_ . \_\_\_\_



### Pre-BD FEV1 Data and Percentiles: 1181

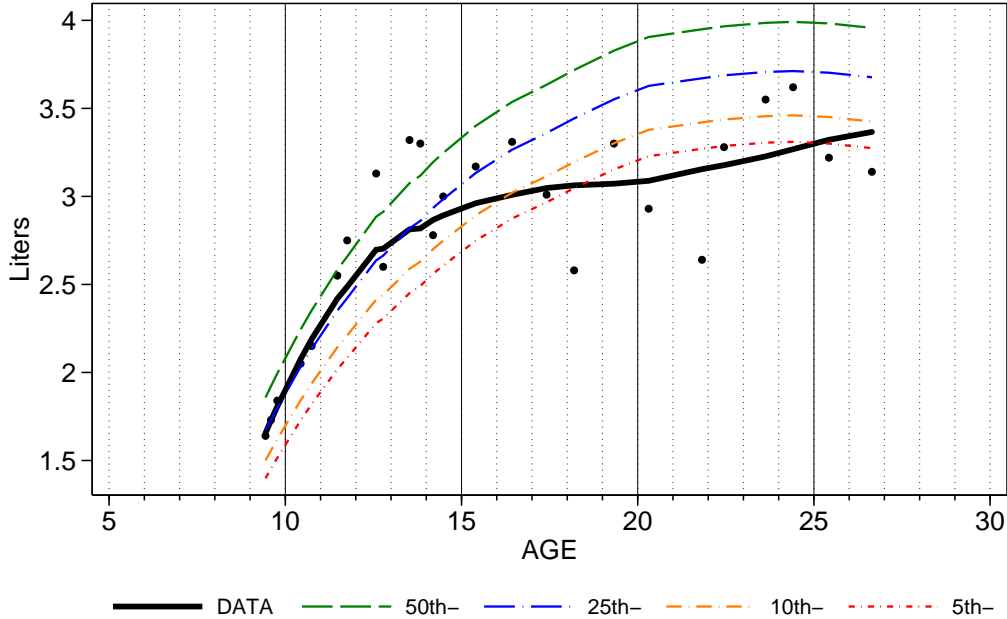

1181

**PATTERN OF GROWTH/DECLINE (Check One)**

- ( 1) Normal Growth
- ( 2) Normal Growth, Early Decline
- ( 3) Reduced Growth
- ( 4) Reduced Growth, Early Decline
- ( 9) Undetermined Pattern
- ( 8) Undetermined - not enough data

Maximum lung growth attained: ( 1) Yes ( 0) No

Plateau started: ( 2) No plateau ( 1) Yes ( 0) No

Decline started: ( 1) Yes ( 0) No

AGE AT each of the following periods (use '99' if N/A):

Maximum Lung Growth: \_\_\_\_ . \_\_\_\_

Start of Plateau: \_\_\_\_ . \_\_\_\_

Start of Decline: \_\_\_\_ . \_\_\_\_

### Pre-BD FEV1 Data and Percentiles: 1183

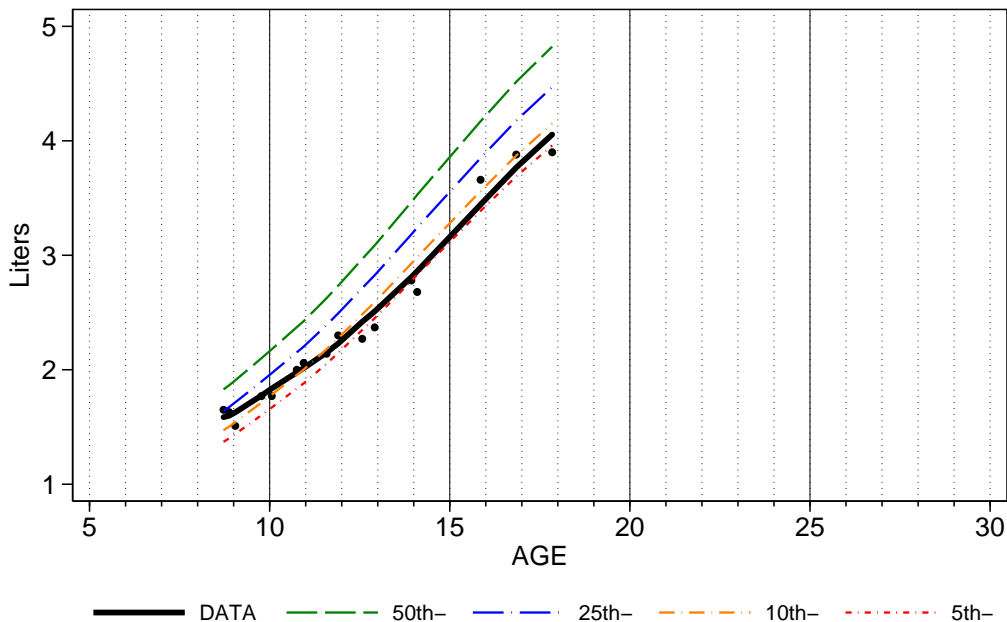

1183

**PATTERN OF GROWTH/DECLINE (Check One)**

- ( 1 ) Normal Growth
- ( 2 ) Normal Growth, Early Decline
- ( 3 ) Reduced Growth
- ( 4 ) Reduced Growth, Early Decline
- ( 9 ) Undetermined Pattern
- ( 8 ) Undetermined - not enough data

Maximum lung growth attained: ( 1 ) Yes ( 0 ) No

Plateau started: ( 2 ) No plateau ( 1 ) Yes ( 0 ) No

Decline started: ( 1 ) Yes ( 0 ) No

AGE AT each of the following periods (use '99' if N/A):

Maximum Lung Growth: \_\_\_\_ . \_\_\_\_

Start of Plateau: \_\_\_\_ . \_\_\_\_

Start of Decline: \_\_\_\_ . \_\_\_\_

### Pre-BD FEV1 Data and Percentiles: 1202

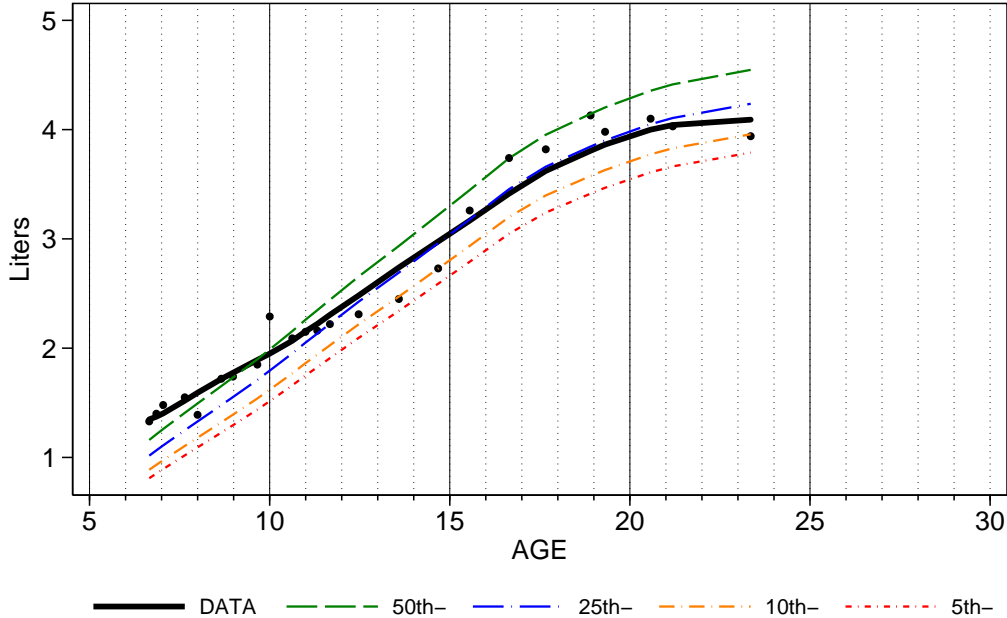

1202

**PATTERN OF GROWTH/DECLINE (Check One)**

- ( 1 ) Normal Growth
- ( 2 ) Normal Growth, Early Decline
- ( 3 ) Reduced Growth
- ( 4 ) Reduced Growth, Early Decline
- ( 9 ) Undetermined Pattern
- ( 8 ) Undetermined - not enough data

Maximum lung growth attained: ( 1 ) Yes ( 0 ) No

Plateau started: ( 2 ) No plateau ( 1 ) Yes ( 0 ) No

Decline started: ( 1 ) Yes ( 0 ) No

AGE AT each of the following periods (use '99' if N/A):

Maximum Lung Growth: \_\_\_\_ . \_\_\_\_

Start of Plateau: \_\_\_\_ . \_\_\_\_

Start of Decline: \_\_\_\_ . \_\_\_\_

### Pre-BD FEV1 Data and Percentiles: 1214

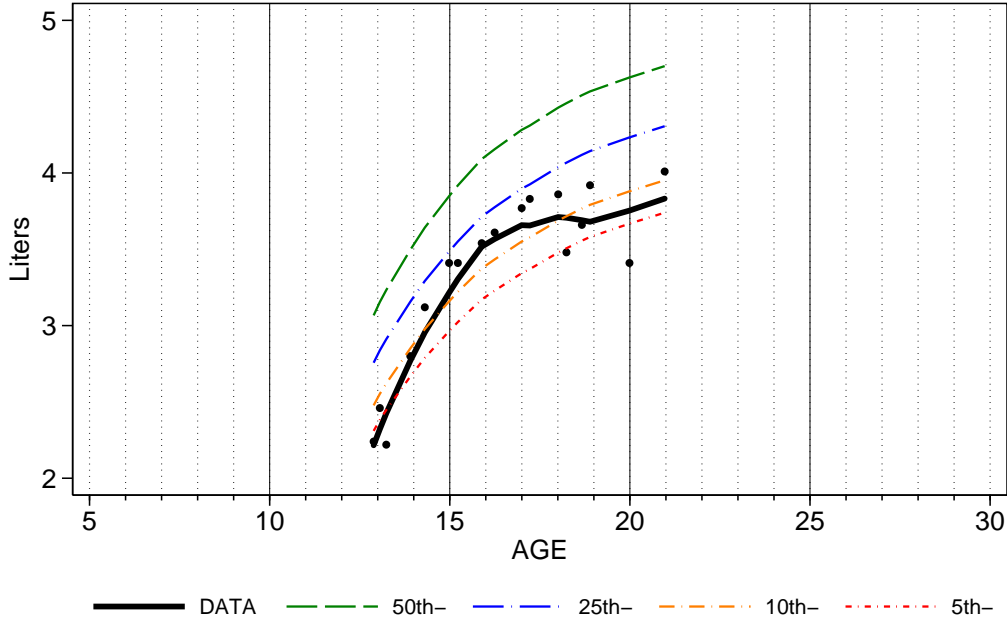

1214

**PATTERN OF GROWTH/DECLINE (Check One)**

- ( 1) Normal Growth
- ( 2) Normal Growth, Early Decline
- ( 3) Reduced Growth
- ( 4) Reduced Growth, Early Decline
- ( 9) Undetermined Pattern
- ( 8) Undetermined - not enough data

Maximum lung growth attained: ( 1) Yes ( 0) No

Plateau started: ( 2) No plateau ( 1) Yes ( 0) No

Decline started: ( 1) Yes ( 0) No

AGE AT each of the following periods (use '99' if N/A):

Maximum Lung Growth: \_\_\_\_ . \_\_\_\_

Start of Plateau: \_\_\_\_ . \_\_\_\_

Start of Decline: \_\_\_\_ . \_\_\_\_

### Pre-BD FEV1 Data and Percentiles: 1216

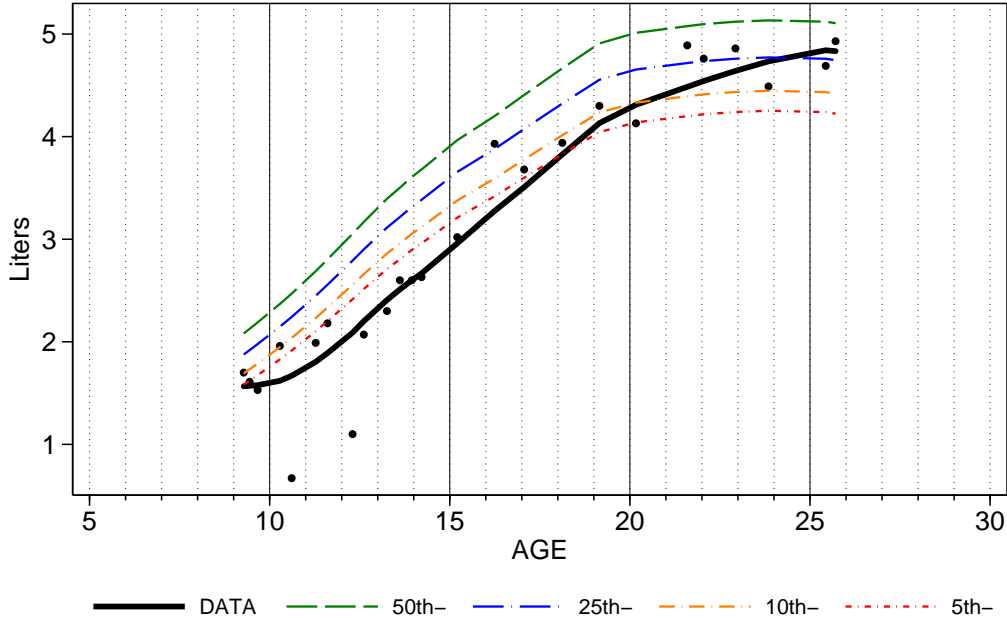

1216

**PATTERN OF GROWTH/DECLINE (Check One)**

- ( 1 ) Normal Growth
- ( 2 ) Normal Growth, Early Decline
- ( 3 ) Reduced Growth
- ( 4 ) Reduced Growth, Early Decline
- ( 9 ) Undetermined Pattern
- ( 8 ) Undetermined - not enough data

Maximum lung growth attained: ( 1 ) Yes ( 0 ) No

Plateau started: ( 2 ) No plateau ( 1 ) Yes ( 0 ) No

Decline started: ( 1 ) Yes ( 0 ) No

AGE AT each of the following periods (use '99' if N/A):

Maximum Lung Growth: \_\_\_\_ . \_\_\_\_

Start of Plateau: \_\_\_\_ . \_\_\_\_

Start of Decline: \_\_\_\_ . \_\_\_\_

### Pre-BD FEV1 Data and Percentiles: 1217

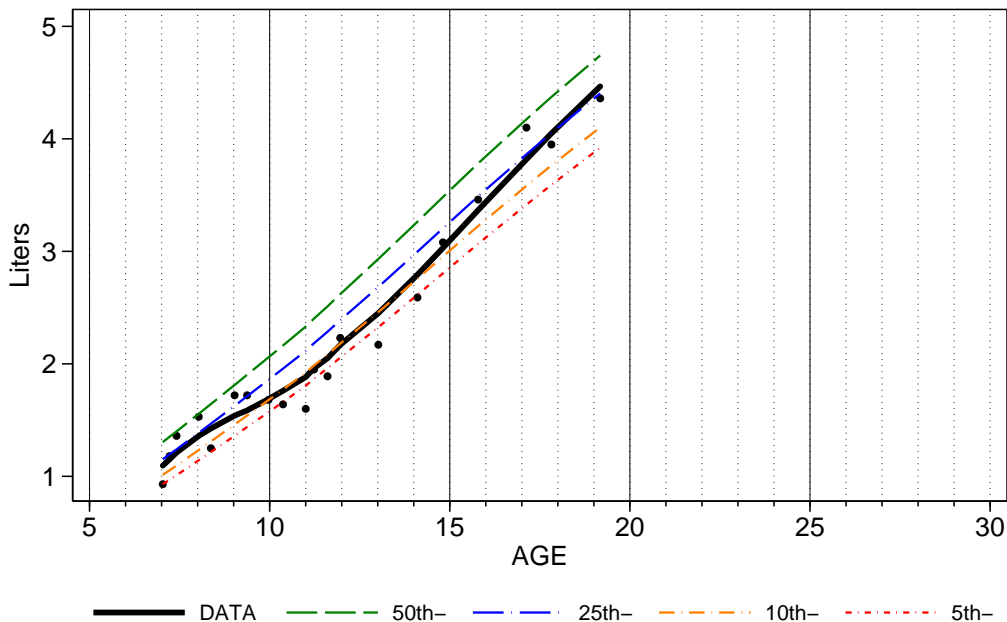

1217

**PATTERN OF GROWTH/DECLINE (Check One)**

- ( 1) Normal Growth
- ( 2) Normal Growth, Early Decline
- ( 3) Reduced Growth
- ( 4) Reduced Growth, Early Decline
- ( 9) Undetermined Pattern
- ( 8) Undetermined - not enough data

Maximum lung growth attained: ( 1) Yes ( 0) No

Plateau started: ( 2) No plateau ( 1) Yes ( 0) No

Decline started: ( 1) Yes ( 0) No

AGE AT each of the following periods (use '99' if N/A):

Maximum Lung Growth: \_\_\_\_ . \_\_\_\_

Start of Plateau: \_\_\_\_ . \_\_\_\_

Start of Decline: \_\_\_\_ . \_\_\_\_

### Pre-BD FEV1 Data and Percentiles: 1225

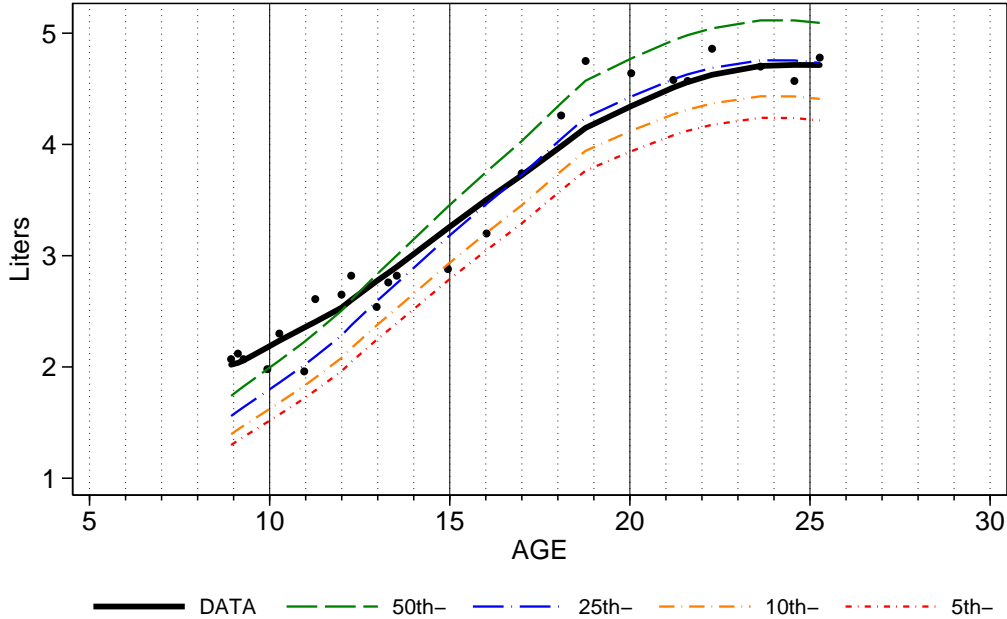

1225

**PATTERN OF GROWTH/DECLINE (Check One)**

- ( 1 ) Normal Growth
- ( 2 ) Normal Growth, Early Decline
- ( 3 ) Reduced Growth
- ( 4 ) Reduced Growth, Early Decline
- ( 9 ) Undetermined Pattern
- ( 8 ) Undetermined - not enough data

Maximum lung growth attained: ( 1 ) Yes ( 0 ) No

Plateau started: ( 2 ) No plateau ( 1 ) Yes ( 0 ) No

Decline started: ( 1 ) Yes ( 0 ) No

AGE AT each of the following periods (use '99' if N/A):

Maximum Lung Growth: \_\_\_\_ . \_\_\_\_

Start of Plateau: \_\_\_\_ . \_\_\_\_

Start of Decline: \_\_\_\_ . \_\_\_\_

### Pre-BD FEV1 Data and Percentiles: 1227

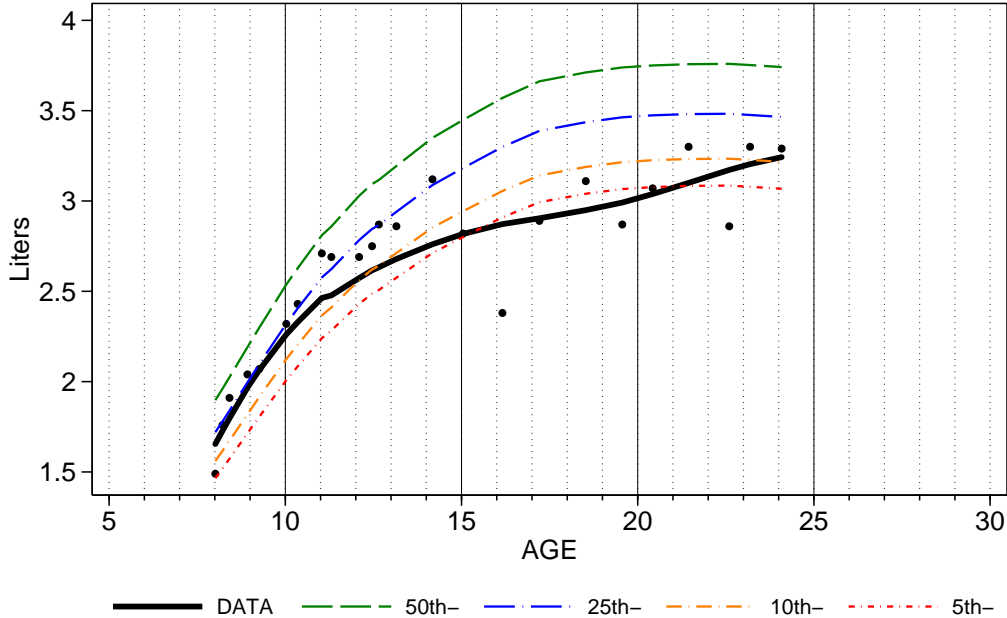

1227

**PATTERN OF GROWTH/DECLINE (Check One)**

- ( 1) Normal Growth
- ( 2) Normal Growth, Early Decline
- ( 3) Reduced Growth
- ( 4) Reduced Growth, Early Decline
- ( 9) Undetermined Pattern
- ( 8) Undetermined - not enough data

Maximum lung growth attained: ( 1) Yes ( 0) No

Plateau started: ( 2) No plateau ( 1) Yes ( 0) No

Decline started: ( 1) Yes ( 0) No

AGE AT each of the following periods (use '99' if N/A):

Maximum Lung Growth: \_\_\_\_ . \_\_\_\_

Start of Plateau: \_\_\_\_ . \_\_\_\_

Start of Decline: \_\_\_\_ . \_\_\_\_



### Pre-BD FEV1 Data and Percentiles: 1228

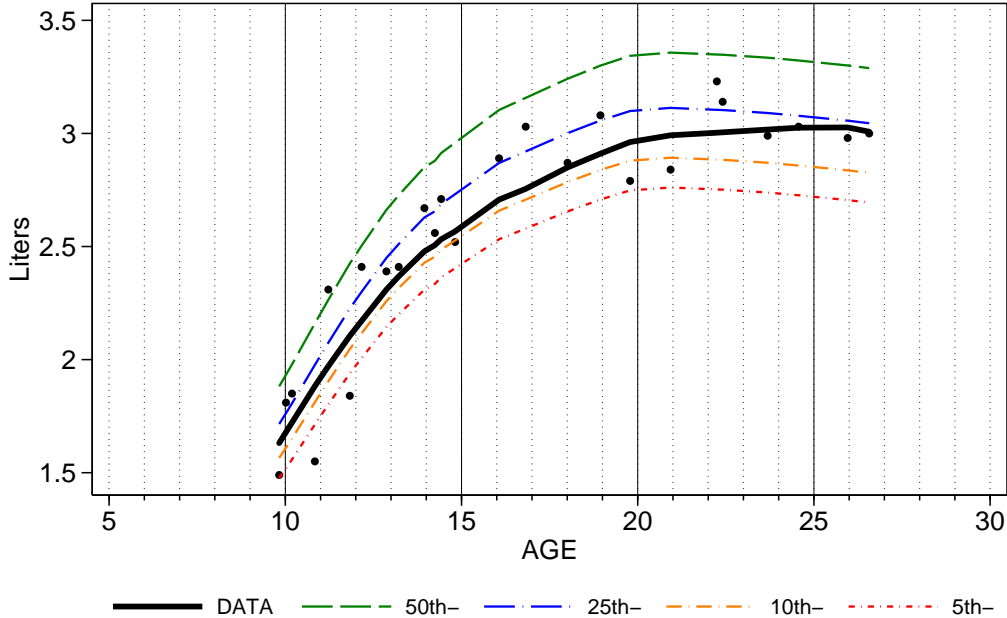

1228

**PATTERN OF GROWTH/DECLINE (Check One)**

- ( 1) Normal Growth
- ( 2) Normal Growth, Early Decline
- ( 3) Reduced Growth
- ( 4) Reduced Growth, Early Decline
- ( 9) Undetermined Pattern
- ( 8) Undetermined - not enough data

Maximum lung growth attained: ( 1) Yes ( 0) No

Plateau started: ( 2) No plateau ( 1) Yes ( 0) No

Decline started: ( 1) Yes ( 0) No

AGE AT each of the following periods (use '99' if N/A):

Maximum Lung Growth: \_\_\_\_ . \_\_\_\_

Start of Plateau: \_\_\_\_ . \_\_\_\_

Start of Decline: \_\_\_\_ . \_\_\_\_

### Pre-BD FEV1 Data and Percentiles: 1229

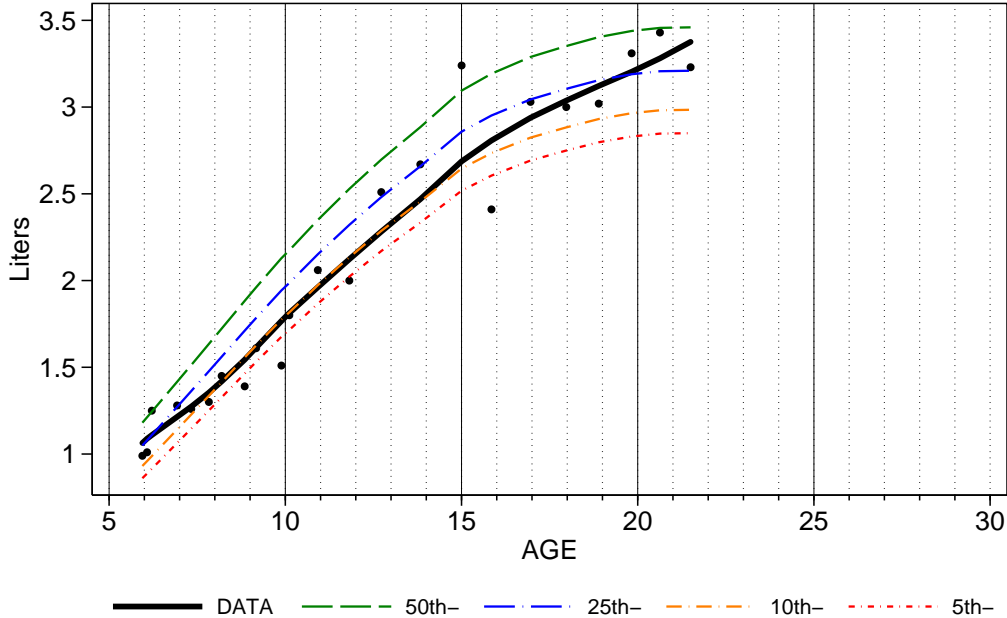

1229

**PATTERN OF GROWTH/DECLINE (Check One)**

- ( 1 ) Normal Growth
- ( 2 ) Normal Growth, Early Decline
- ( 3 ) Reduced Growth
- ( 4 ) Reduced Growth, Early Decline
- ( 9 ) Undetermined Pattern
- ( 8 ) Undetermined - not enough data

Maximum lung growth attained: ( 1 ) Yes ( 0 ) No

Plateau started: ( 2 ) No plateau ( 1 ) Yes ( 0 ) No

Decline started: ( 1 ) Yes ( 0 ) No

AGE AT each of the following periods (use '99' if N/A):

Maximum Lung Growth: \_\_\_\_ . \_\_\_\_

Start of Plateau: \_\_\_\_ . \_\_\_\_

Start of Decline: \_\_\_\_ . \_\_\_\_

### Pre-BD FEV1 Data and Percentiles: 1230

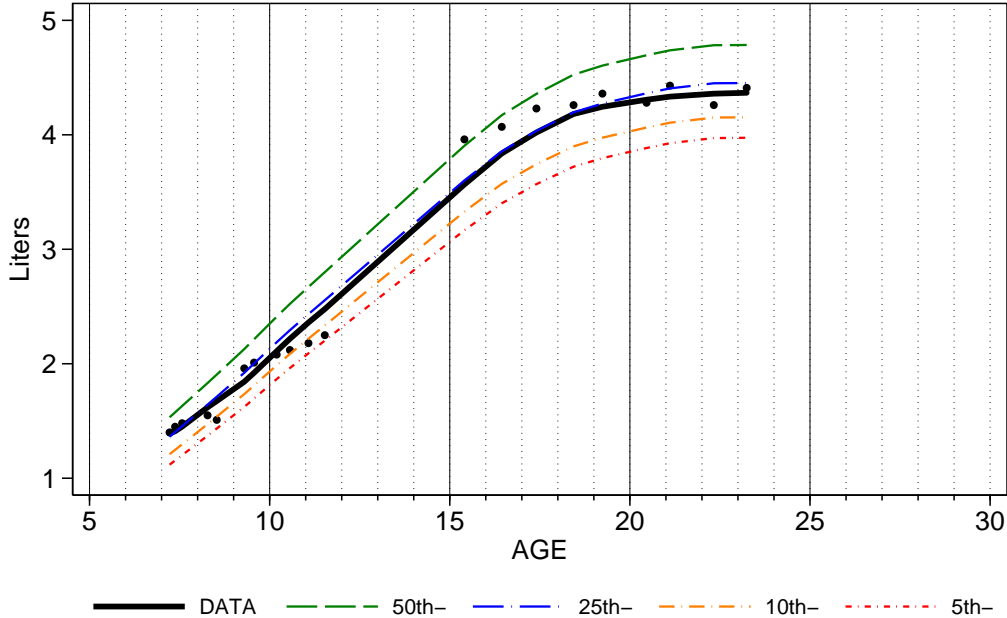

1230

**PATTERN OF GROWTH/DECLINE (Check One)**

- ( 1 ) Normal Growth
- ( 2 ) Normal Growth, Early Decline
- ( 3 ) Reduced Growth
- ( 4 ) Reduced Growth, Early Decline
- ( 9 ) Undetermined Pattern
- ( 8 ) Undetermined - not enough data

Maximum lung growth attained: ( 1 ) Yes ( 0 ) No

Plateau started: ( 2 ) No plateau ( 1 ) Yes ( 0 ) No

Decline started: ( 1 ) Yes ( 0 ) No

AGE AT each of the following periods (use '99' if N/A):

Maximum Lung Growth: \_\_\_\_ . \_\_\_\_

Start of Plateau: \_\_\_\_ . \_\_\_\_

Start of Decline: \_\_\_\_ . \_\_\_\_

### Pre-BD FEV1 Data and Percentiles: 1232

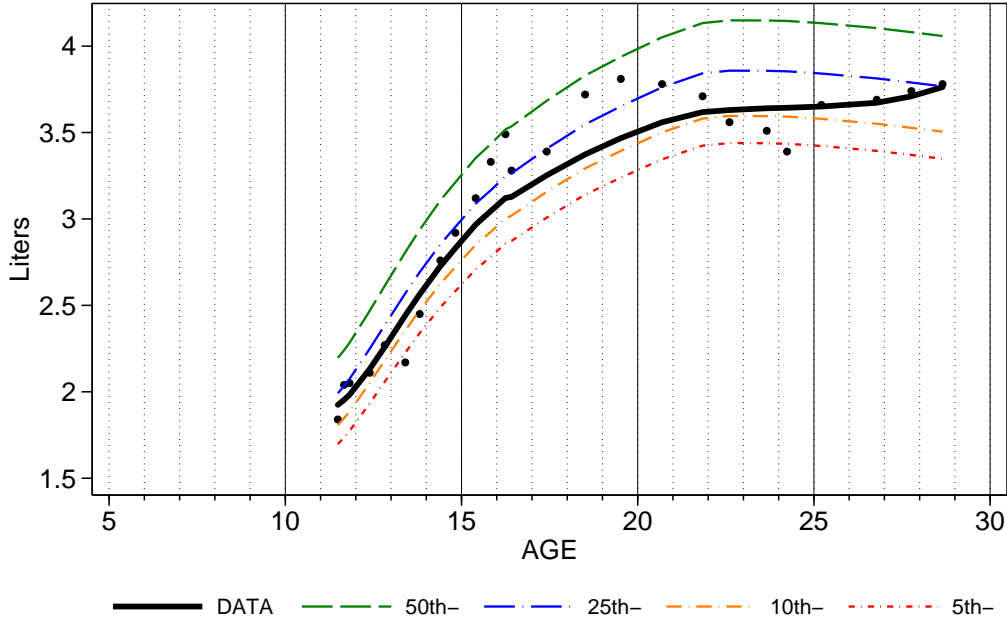

1232

**PATTERN OF GROWTH/DECLINE (Check One)**

- ( 1) Normal Growth
- ( 2) Normal Growth, Early Decline
- ( 3) Reduced Growth
- ( 4) Reduced Growth, Early Decline
- ( 9) Undetermined Pattern
- ( 8) Undetermined - not enough data

Maximum lung growth attained: ( 1) Yes ( 0) No

Plateau started: ( 2) No plateau ( 1) Yes ( 0) No

Decline started: ( 1) Yes ( 0) No

AGE AT each of the following periods (use '99' if N/A):

Maximum Lung Growth: \_\_\_\_ . \_\_\_\_

Start of Plateau: \_\_\_\_ . \_\_\_\_

Start of Decline: \_\_\_\_ . \_\_\_\_

### Pre-BD FEV1 Data and Percentiles: 1240

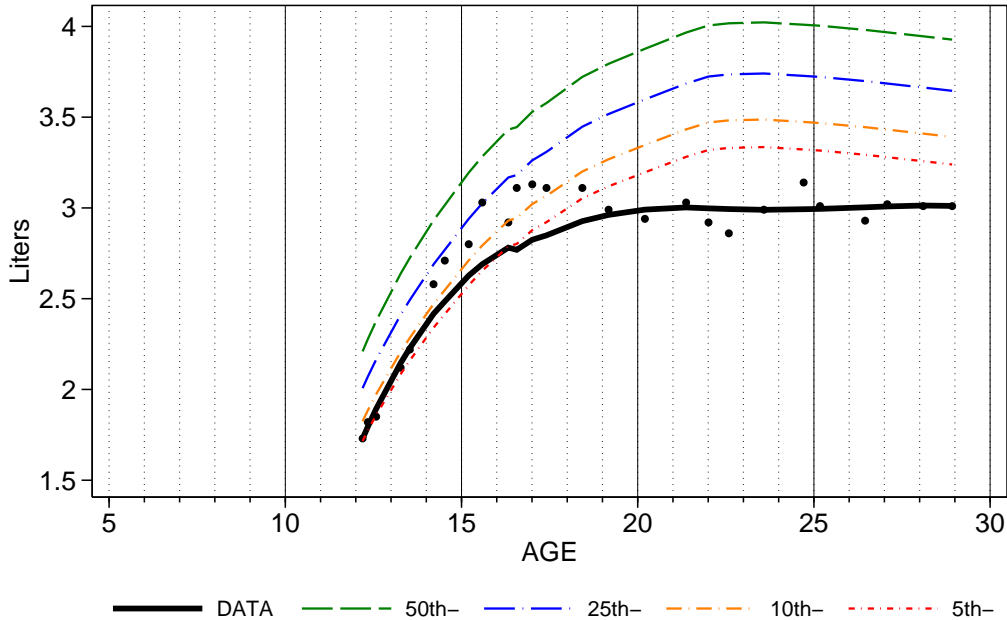

1240

**PATTERN OF GROWTH/DECLINE (Check One)**

- ( 1) Normal Growth
- ( 2) Normal Growth, Early Decline
- ( 3) Reduced Growth
- ( 4) Reduced Growth, Early Decline
- ( 9) Undetermined Pattern
- ( 8) Undetermined - not enough data

Maximum lung growth attained: ( 1) Yes ( 0) No

Plateau started: ( 2) No plateau ( 1) Yes ( 0) No

Decline started: ( 1) Yes ( 0) No

AGE AT each of the following periods (use '99' if N/A):

Maximum Lung Growth: \_\_\_\_ . \_\_\_\_

Start of Plateau: \_\_\_\_ . \_\_\_\_

Start of Decline: \_\_\_\_ . \_\_\_\_

### Pre-BD FEV1 Data and Percentiles: 1248

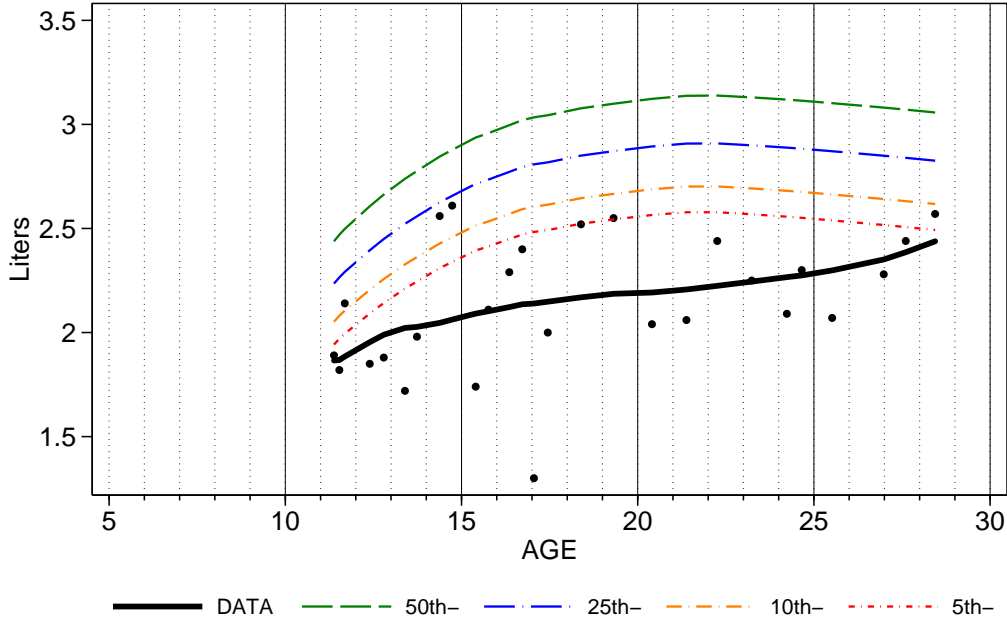

1248

**PATTERN OF GROWTH/DECLINE (Check One)**

- ( 1) Normal Growth
- ( 2) Normal Growth, Early Decline
- ( 3) Reduced Growth
- ( 4) Reduced Growth, Early Decline
- ( 9) Undetermined Pattern
- ( 8) Undetermined - not enough data

Maximum lung growth attained: ( 1) Yes ( 0) No

Plateau started: ( 2) No plateau ( 1) Yes ( 0) No

Decline started: ( 1) Yes ( 0) No

AGE AT each of the following periods (use '99' if N/A):

Maximum Lung Growth: \_\_\_\_ . \_\_\_\_

Start of Plateau: \_\_\_\_ . \_\_\_\_

Start of Decline: \_\_\_\_ . \_\_\_\_

### Pre-BD FEV1 Data and Percentiles: 1249

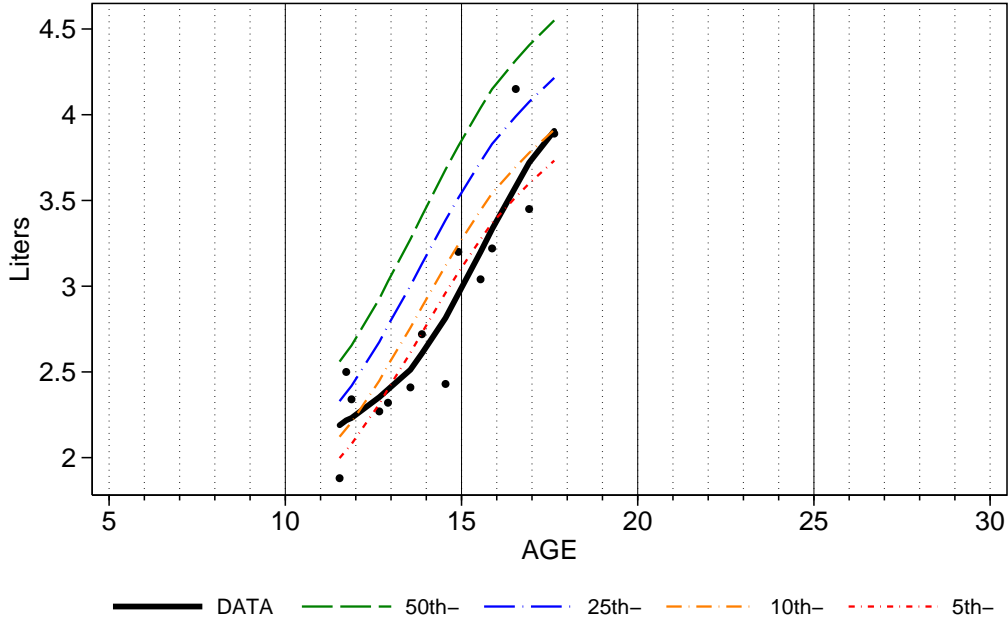

1249

**PATTERN OF GROWTH/DECLINE (Check One)**

- ( 1) Normal Growth
- ( 2) Normal Growth, Early Decline
- ( 3) Reduced Growth
- ( 4) Reduced Growth, Early Decline
- ( 9) Undetermined Pattern
- ( 8) Undetermined - not enough data

Maximum lung growth attained: ( 1) Yes ( 0) No

Plateau started: ( 2) No plateau ( 1) Yes ( 0) No

Decline started: ( 1) Yes ( 0) No

AGE AT each of the following periods (use '99' if N/A):

Maximum Lung Growth: \_\_\_\_ . \_\_\_\_

Start of Plateau: \_\_\_\_ . \_\_\_\_

Start of Decline: \_\_\_\_ . \_\_\_\_

### Pre-BD FEV1 Data and Percentiles: 1253

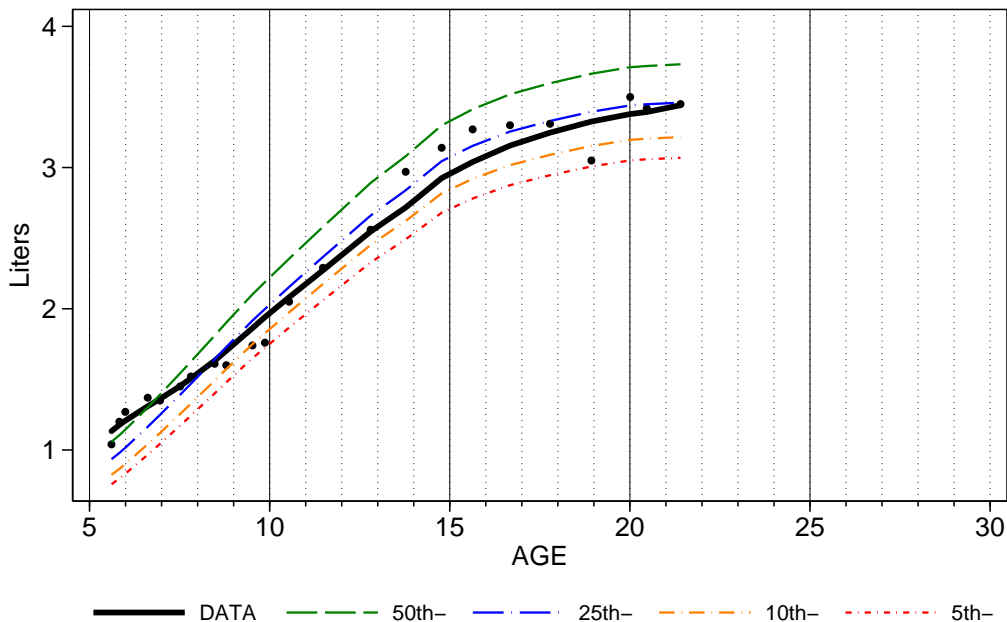

1253

**PATTERN OF GROWTH/DECLINE (Check One)**

- ( 1 ) Normal Growth
- ( 2 ) Normal Growth, Early Decline
- ( 3 ) Reduced Growth
- ( 4 ) Reduced Growth, Early Decline
- ( 9 ) Undetermined Pattern
- ( 8 ) Undetermined - not enough data

Maximum lung growth attained: ( 1 ) Yes ( 0 ) No

Plateau started: ( 2 ) No plateau ( 1 ) Yes ( 0 ) No

Decline started: ( 1 ) Yes ( 0 ) No

AGE AT each of the following periods (use '99' if N/A):

Maximum Lung Growth: \_\_\_\_ . \_\_\_\_

Start of Plateau: \_\_\_\_ . \_\_\_\_

Start of Decline: \_\_\_\_ . \_\_\_\_



### Pre-BD FEV1 Data and Percentiles: 1255

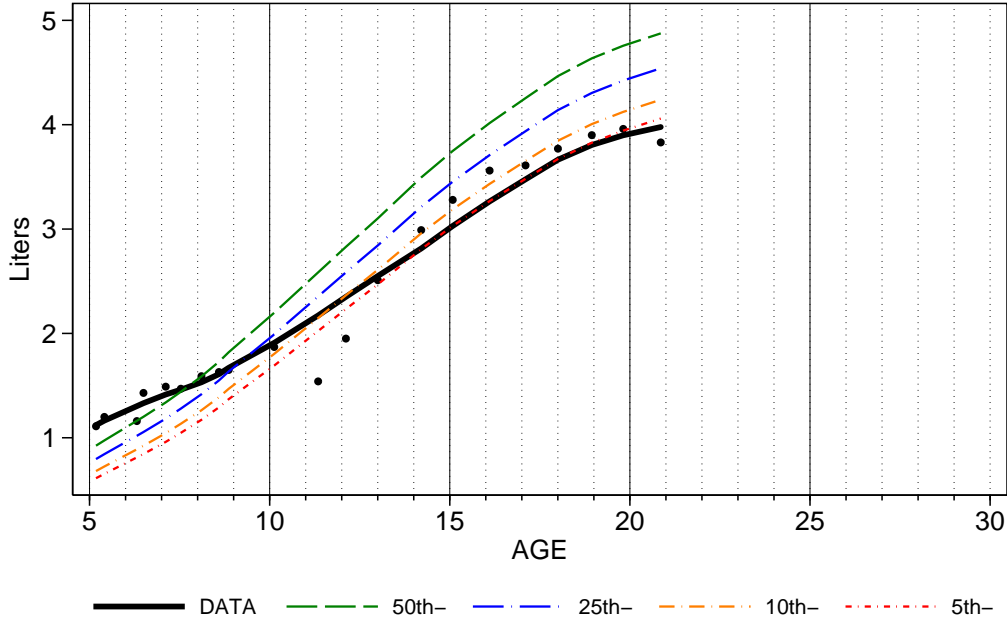

1255

**PATTERN OF GROWTH/DECLINE (Check One)**

- ( 1 ) Normal Growth
- ( 2 ) Normal Growth, Early Decline
- ( 3 ) Reduced Growth
- ( 4 ) Reduced Growth, Early Decline
- ( 9 ) Undetermined Pattern
- ( 8 ) Undetermined - not enough data

Maximum lung growth attained: ( 1 ) Yes ( 0 ) No

Plateau started: ( 2 ) No plateau ( 1 ) Yes ( 0 ) No

Decline started: ( 1 ) Yes ( 0 ) No

AGE AT each of the following periods (use '99' if N/A):

Maximum Lung Growth: \_\_\_\_ . \_\_\_\_

Start of Plateau: \_\_\_\_ . \_\_\_\_

Start of Decline: \_\_\_\_ . \_\_\_\_

### Pre-BD FEV1 Data and Percentiles: 1256

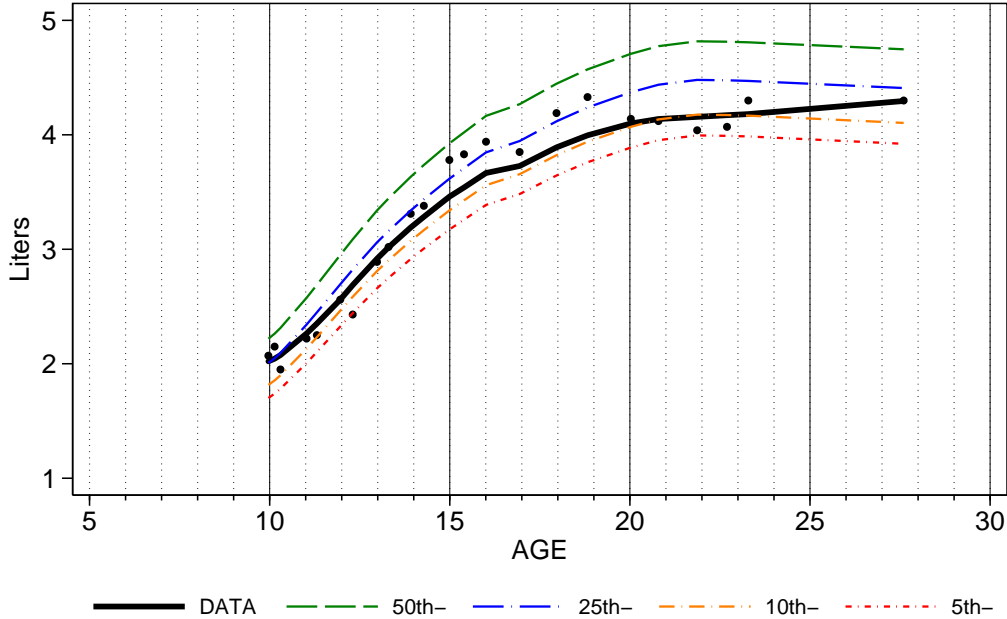

1256

**PATTERN OF GROWTH/DECLINE (Check One)**

- ( 1 ) Normal Growth
- ( 2 ) Normal Growth, Early Decline
- ( 3 ) Reduced Growth
- ( 4 ) Reduced Growth, Early Decline
- ( 9 ) Undetermined Pattern
- ( 8 ) Undetermined - not enough data

Maximum lung growth attained: ( 1 ) Yes ( 0 ) No

Plateau started: ( 2 ) No plateau ( 1 ) Yes ( 0 ) No

Decline started: ( 1 ) Yes ( 0 ) No

AGE AT each of the following periods (use '99' if N/A):

Maximum Lung Growth: \_\_\_\_ . \_\_\_\_

Start of Plateau: \_\_\_\_ . \_\_\_\_

Start of Decline: \_\_\_\_ . \_\_\_\_

### Pre-BD FEV1 Data and Percentiles: 1271

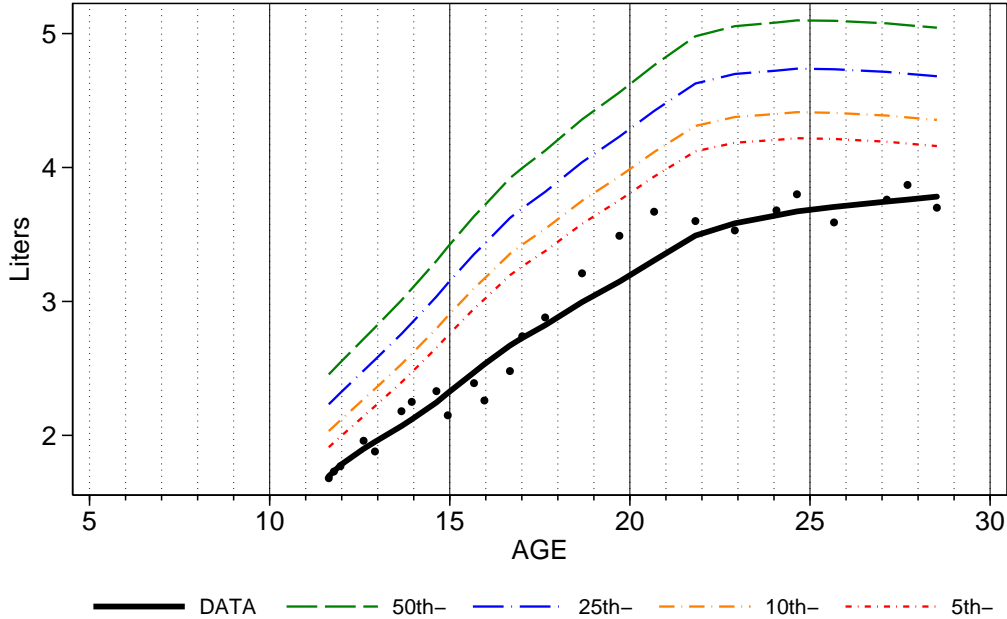

1271

**PATTERN OF GROWTH/DECLINE (Check One)**

- ( 1) Normal Growth
- ( 2) Normal Growth, Early Decline
- ( 3) Reduced Growth
- ( 4) Reduced Growth, Early Decline
- ( 9) Undetermined Pattern
- ( 8) Undetermined - not enough data

Maximum lung growth attained: ( 1) Yes ( 0) No

Plateau started: ( 2) No plateau ( 1) Yes ( 0) No

Decline started: ( 1) Yes ( 0) No

AGE AT each of the following periods (use '99' if N/A):

Maximum Lung Growth: \_\_\_\_ . \_\_\_\_

Start of Plateau: \_\_\_\_ . \_\_\_\_

Start of Decline: \_\_\_\_ . \_\_\_\_

### Pre-BD FEV1 Data and Percentiles: 1273

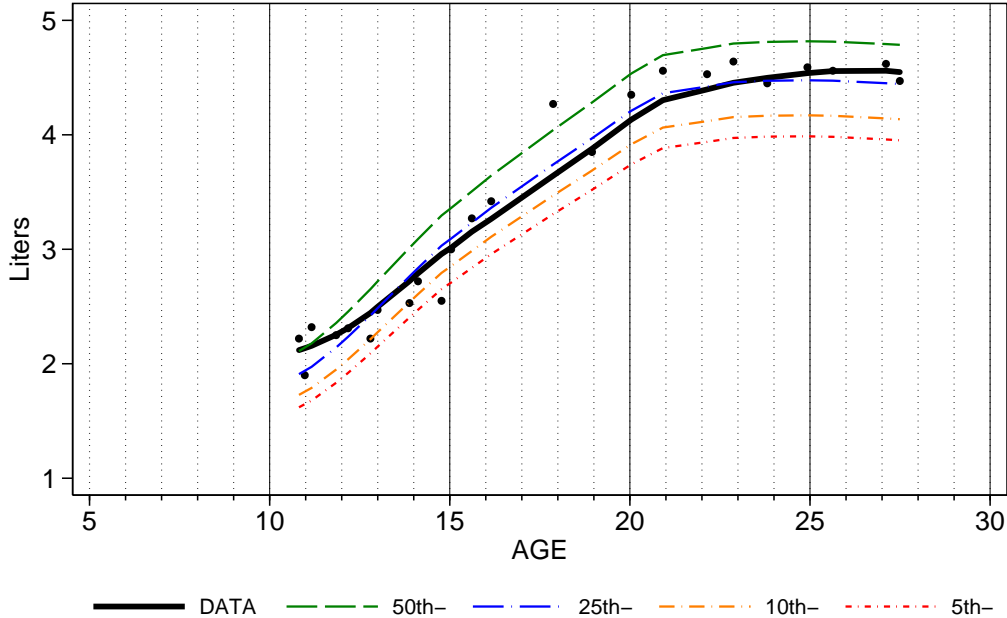

1273

**PATTERN OF GROWTH/DECLINE (Check One)**

- ( 1 ) Normal Growth
- ( 2 ) Normal Growth, Early Decline
- ( 3 ) Reduced Growth
- ( 4 ) Reduced Growth, Early Decline
- ( 9 ) Undetermined Pattern
- ( 8 ) Undetermined - not enough data

Maximum lung growth attained: ( 1 ) Yes ( 0 ) No

Plateau started: ( 2 ) No plateau ( 1 ) Yes ( 0 ) No

Decline started: ( 1 ) Yes ( 0 ) No

AGE AT each of the following periods (use '99' if N/A):

Maximum Lung Growth: \_\_\_\_ . \_\_\_\_

Start of Plateau: \_\_\_\_ . \_\_\_\_

Start of Decline: \_\_\_\_ . \_\_\_\_

### Pre-BD FEV1 Data and Percentiles: 1274

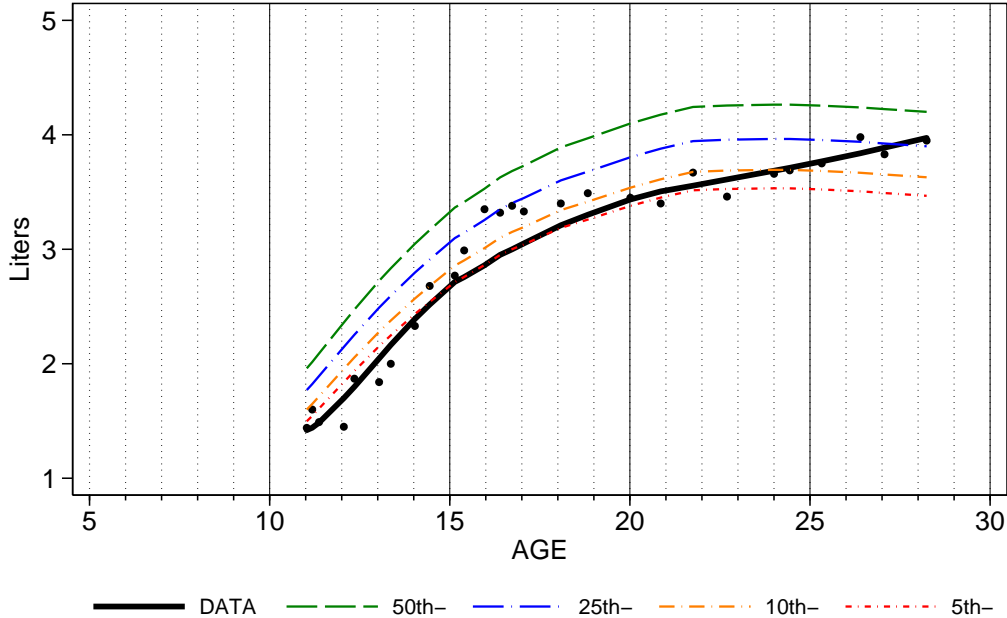

1274

**PATTERN OF GROWTH/DECLINE (Check One)**

- ( 1) Normal Growth
- ( 2) Normal Growth, Early Decline
- ( 3) Reduced Growth
- ( 4) Reduced Growth, Early Decline
- ( 9) Undetermined Pattern
- ( 8) Undetermined - not enough data

Maximum lung growth attained: ( 1) Yes ( 0) No

Plateau started: ( 2) No plateau ( 1) Yes ( 0) No

Decline started: ( 1) Yes ( 0) No

AGE AT each of the following periods (use '99' if N/A):

Maximum Lung Growth: \_\_\_\_ . \_\_\_\_

Start of Plateau: \_\_\_\_ . \_\_\_\_

Start of Decline: \_\_\_\_ . \_\_\_\_

### Pre-BD FEV1 Data and Percentiles: 1277

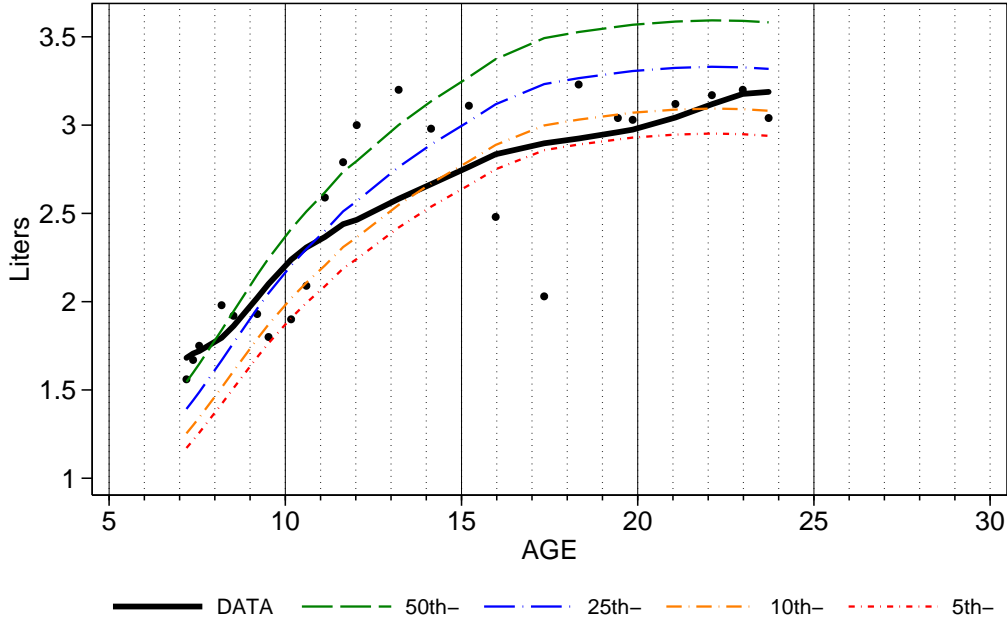

1277

**PATTERN OF GROWTH/DECLINE (Check One)**

- ( 1 ) Normal Growth
- ( 2 ) Normal Growth, Early Decline
- ( 3 ) Reduced Growth
- ( 4 ) Reduced Growth, Early Decline
- ( 9 ) Undetermined Pattern
- ( 8 ) Undetermined - not enough data

Maximum lung growth attained: ( 1 ) Yes ( 0 ) No

Plateau started: ( 2 ) No plateau ( 1 ) Yes ( 0 ) No

Decline started: ( 1 ) Yes ( 0 ) No

AGE AT each of the following periods (use '99' if N/A):

Maximum Lung Growth: \_\_\_\_ . \_\_\_\_

Start of Plateau: \_\_\_\_ . \_\_\_\_

Start of Decline: \_\_\_\_ . \_\_\_\_

### Pre-BD FEV1 Data and Percentiles: 1278

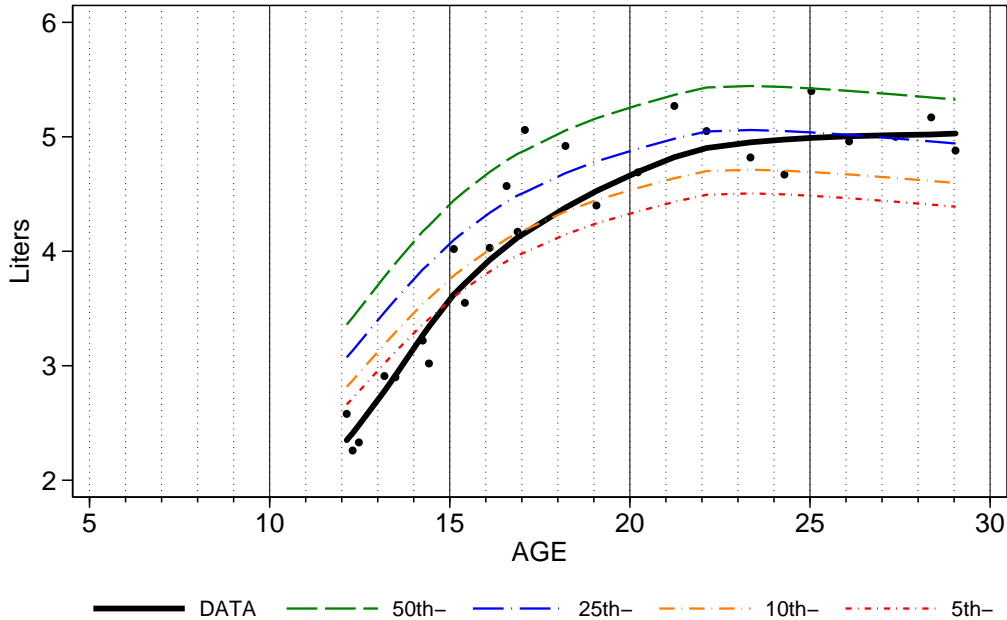

1278

**PATTERN OF GROWTH/DECLINE (Check One)**

- ( 1) Normal Growth
- ( 2) Normal Growth, Early Decline
- ( 3) Reduced Growth
- ( 4) Reduced Growth, Early Decline
- ( 9) Undetermined Pattern
- ( 8) Undetermined - not enough data

Maximum lung growth attained: ( 1) Yes ( 0) No

Plateau started: ( 2) No plateau ( 1) Yes ( 0) No

Decline started: ( 1) Yes ( 0) No

AGE AT each of the following periods (use '99' if N/A):

Maximum Lung Growth: \_\_\_\_ . \_\_\_\_

Start of Plateau: \_\_\_\_ . \_\_\_\_

Start of Decline: \_\_\_\_ . \_\_\_\_

### Pre-BD FEV1 Data and Percentiles: 1279

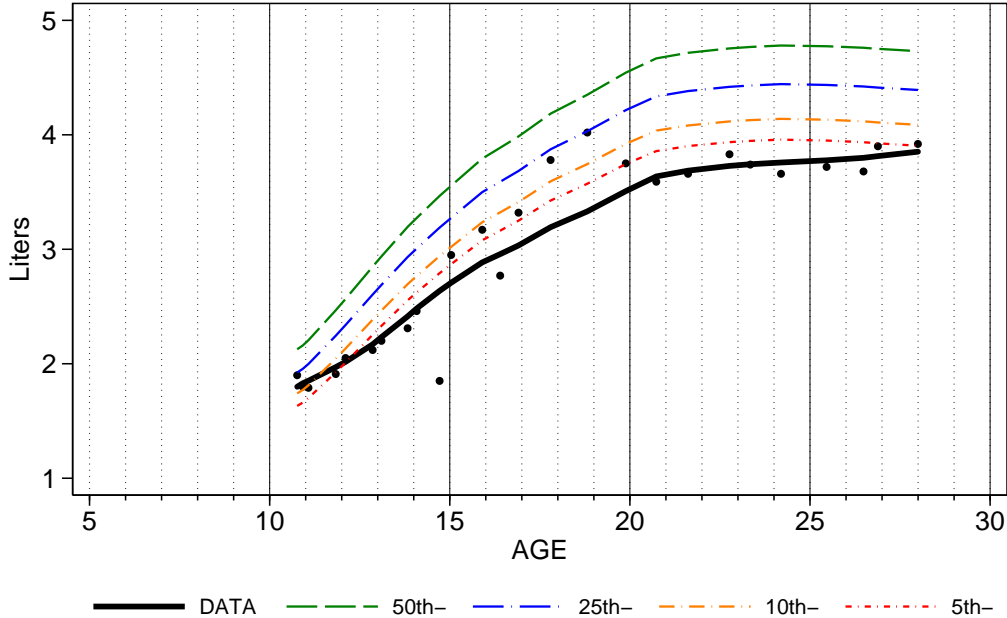

1279

**PATTERN OF GROWTH/DECLINE (Check One)**

- ( 1) Normal Growth
- ( 2) Normal Growth, Early Decline
- ( 3) Reduced Growth
- ( 4) Reduced Growth, Early Decline
- ( 9) Undetermined Pattern
- ( 8) Undetermined - not enough data

Maximum lung growth attained: ( 1) Yes ( 0) No

Plateau started: ( 2) No plateau ( 1) Yes ( 0) No

Decline started: ( 1) Yes ( 0) No

AGE AT each of the following periods (use '99' if N/A):

Maximum Lung Growth: \_\_\_\_ . \_\_\_\_

Start of Plateau: \_\_\_\_ . \_\_\_\_

Start of Decline: \_\_\_\_ . \_\_\_\_



### Pre-BD FEV1 Data and Percentiles: 1285

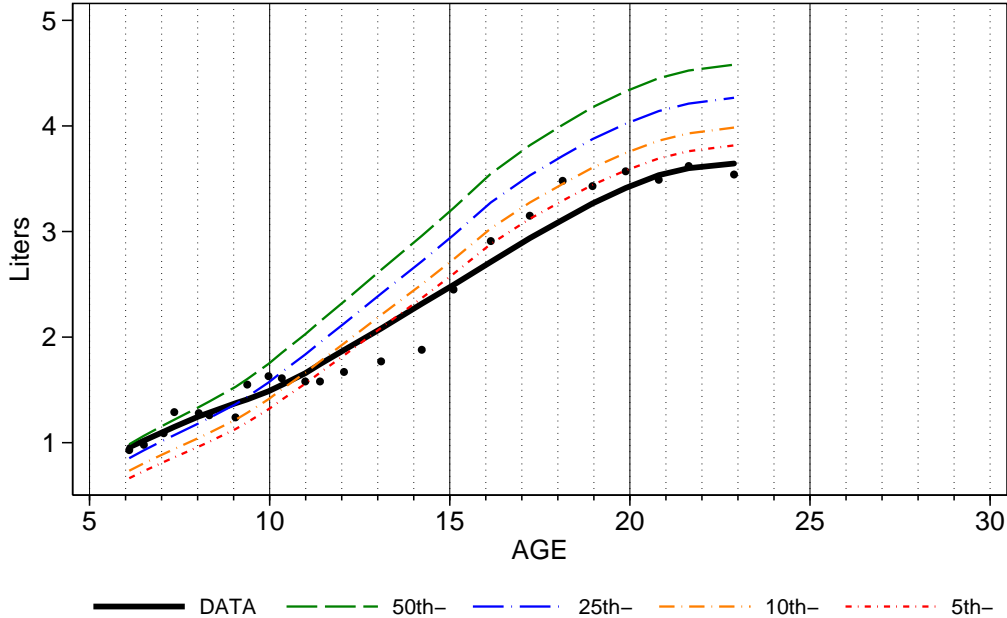

1285

**PATTERN OF GROWTH/DECLINE (Check One)**

- ( 1 ) Normal Growth
- ( 2 ) Normal Growth, Early Decline
- ( 3 ) Reduced Growth
- ( 4 ) Reduced Growth, Early Decline
- ( 9 ) Undetermined Pattern
- ( 8 ) Undetermined - not enough data

Maximum lung growth attained: ( 1 ) Yes ( 0 ) No

Plateau started: ( 2 ) No plateau ( 1 ) Yes ( 0 ) No

Decline started: ( 1 ) Yes ( 0 ) No

AGE AT each of the following periods (use '99' if N/A):

Maximum Lung Growth: \_\_\_\_ . \_\_\_\_

Start of Plateau: \_\_\_\_ . \_\_\_\_

Start of Decline: \_\_\_\_ . \_\_\_\_

### Pre-BD FEV1 Data and Percentiles: 1289

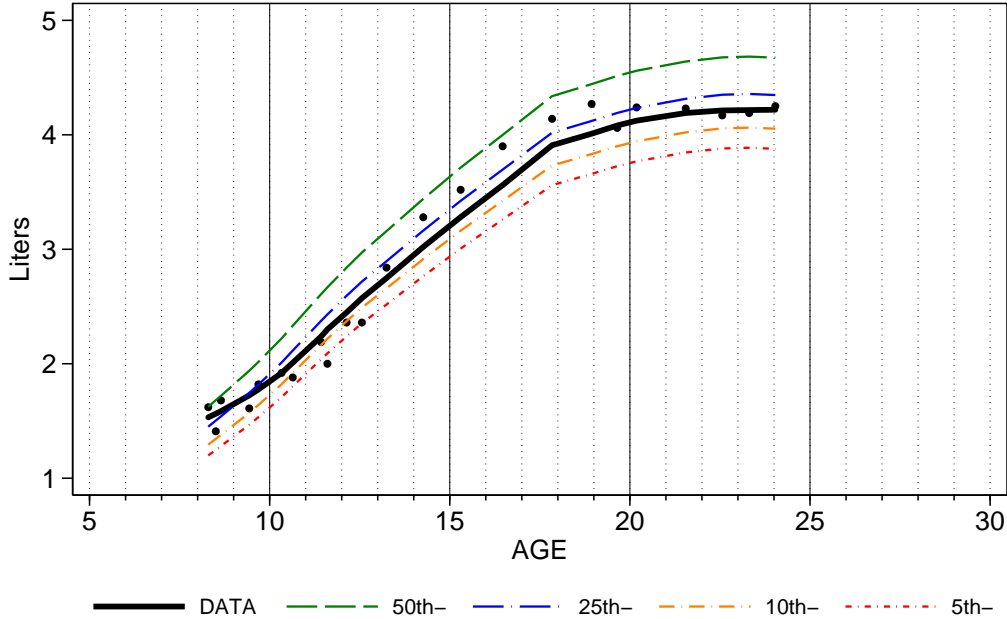

1289

**PATTERN OF GROWTH/DECLINE (Check One)**

- ( 1) Normal Growth
- ( 2) Normal Growth, Early Decline
- ( 3) Reduced Growth
- ( 4) Reduced Growth, Early Decline
- ( 9) Undetermined Pattern
- ( 8) Undetermined - not enough data

Maximum lung growth attained: ( 1) Yes ( 0) No

Plateau started: ( 2) No plateau ( 1) Yes ( 0) No

Decline started: ( 1) Yes ( 0) No

AGE AT each of the following periods (use '99' if N/A):

Maximum Lung Growth: \_\_\_\_ . \_\_\_\_

Start of Plateau: \_\_\_\_ . \_\_\_\_

Start of Decline: \_\_\_\_ . \_\_\_\_

### Pre-BD FEV1 Data and Percentiles: 1296

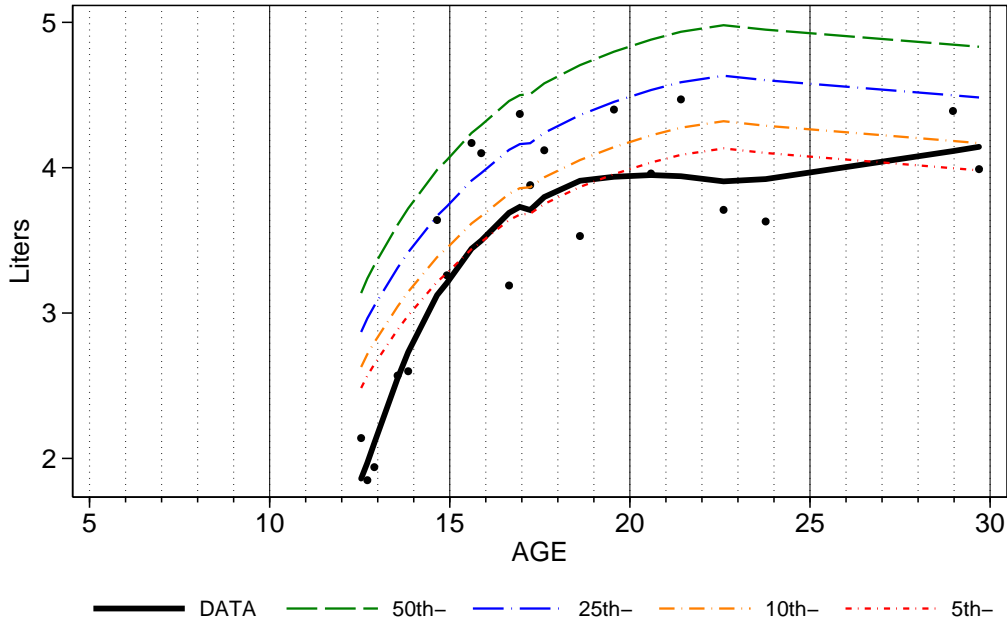

1296

**PATTERN OF GROWTH/DECLINE (Check One)**

- ( 1) Normal Growth
- ( 2) Normal Growth, Early Decline
- ( 3) Reduced Growth
- ( 4) Reduced Growth, Early Decline
- ( 9) Undetermined Pattern
- ( 8) Undetermined - not enough data

Maximum lung growth attained: ( 1) Yes ( 0) No

Plateau started: ( 2) No plateau ( 1) Yes ( 0) No

Decline started: ( 1) Yes ( 0) No

AGE AT each of the following periods (use '99' if N/A):

Maximum Lung Growth: \_\_\_\_ . \_\_\_\_

Start of Plateau: \_\_\_\_ . \_\_\_\_

Start of Decline: \_\_\_\_ . \_\_\_\_

### Pre-BD FEV1 Data and Percentiles: 1301

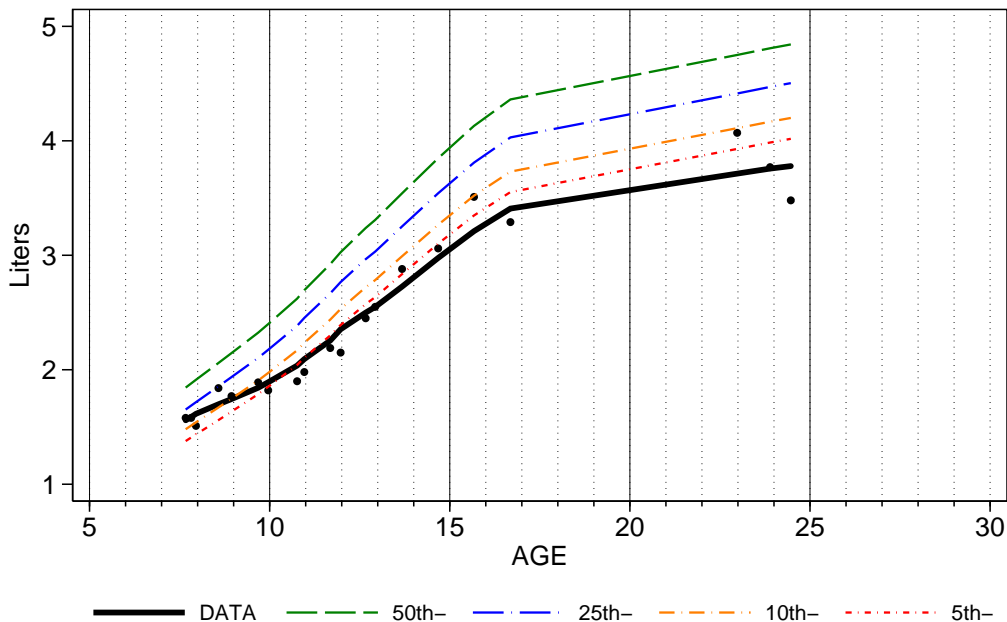

1301

**PATTERN OF GROWTH/DECLINE (Check One)**

- ( 1) Normal Growth
- ( 2) Normal Growth, Early Decline
- ( 3) Reduced Growth
- ( 4) Reduced Growth, Early Decline
- ( 9) Undetermined Pattern
- ( 8) Undetermined - not enough data

Maximum lung growth attained: ( 1) Yes ( 0) No

Plateau started: ( 2) No plateau ( 1) Yes ( 0) No

Decline started: ( 1) Yes ( 0) No

AGE AT each of the following periods (use '99' if N/A):

Maximum Lung Growth: \_\_\_\_ . \_\_\_\_

Start of Plateau: \_\_\_\_ . \_\_\_\_

Start of Decline: \_\_\_\_ . \_\_\_\_

### Pre-BD FEV1 Data and Percentiles: 1302

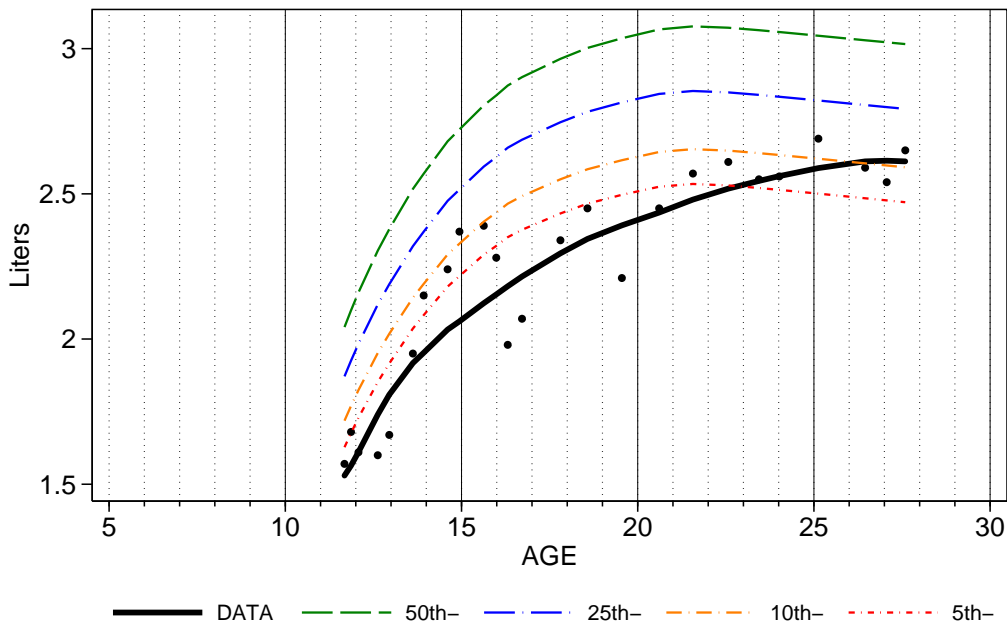

1302

**PATTERN OF GROWTH/DECLINE (Check One)**

- ( 1 ) Normal Growth
- ( 2 ) Normal Growth, Early Decline
- ( 3 ) Reduced Growth
- ( 4 ) Reduced Growth, Early Decline
- ( 9 ) Undetermined Pattern
- ( 8 ) Undetermined - not enough data

Maximum lung growth attained: ( 1 ) Yes ( 0 ) No

Plateau started: ( 2 ) No plateau ( 1 ) Yes ( 0 ) No

Decline started: ( 1 ) Yes ( 0 ) No

AGE AT each of the following periods (use '99' if N/A):

Maximum Lung Growth: \_\_\_\_ . \_\_\_\_

Start of Plateau: \_\_\_\_ . \_\_\_\_

Start of Decline: \_\_\_\_ . \_\_\_\_

### Pre-BD FEV1 Data and Percentiles: 1303

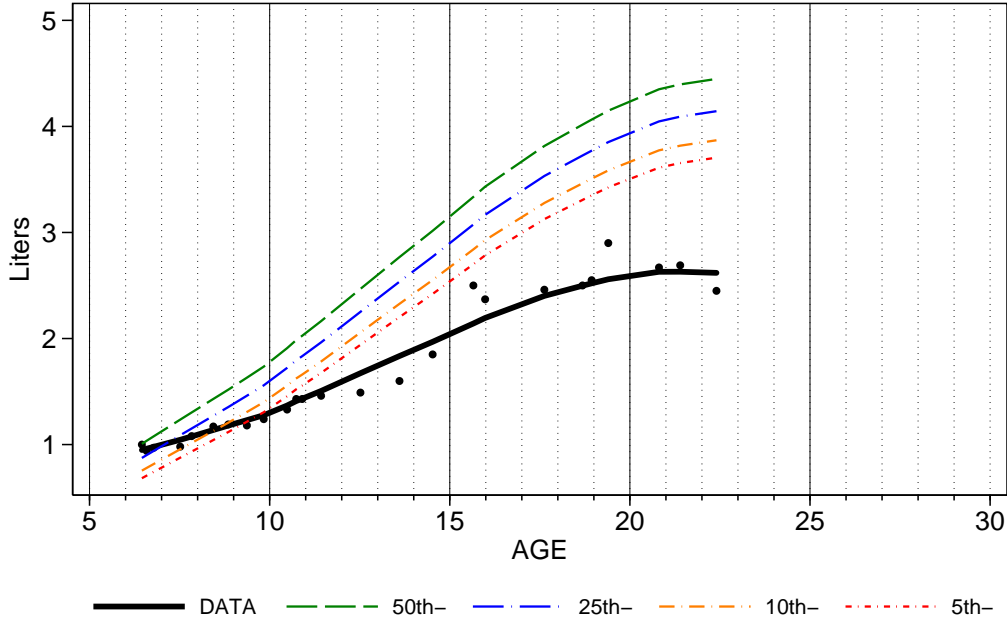

1303

**PATTERN OF GROWTH/DECLINE (Check One)**

- ( 1) Normal Growth
- ( 2) Normal Growth, Early Decline
- ( 3) Reduced Growth
- ( 4) Reduced Growth, Early Decline
- ( 9) Undetermined Pattern
- ( 8) Undetermined - not enough data

Maximum lung growth attained: ( 1) Yes ( 0) No

Plateau started: ( 2) No plateau ( 1) Yes ( 0) No

Decline started: ( 1) Yes ( 0) No

AGE AT each of the following periods (use '99' if N/A):

Maximum Lung Growth: \_\_\_\_ . \_\_\_\_

Start of Plateau: \_\_\_\_ . \_\_\_\_

Start of Decline: \_\_\_\_ . \_\_\_\_

### Pre-BD FEV1 Data and Percentiles: 1313

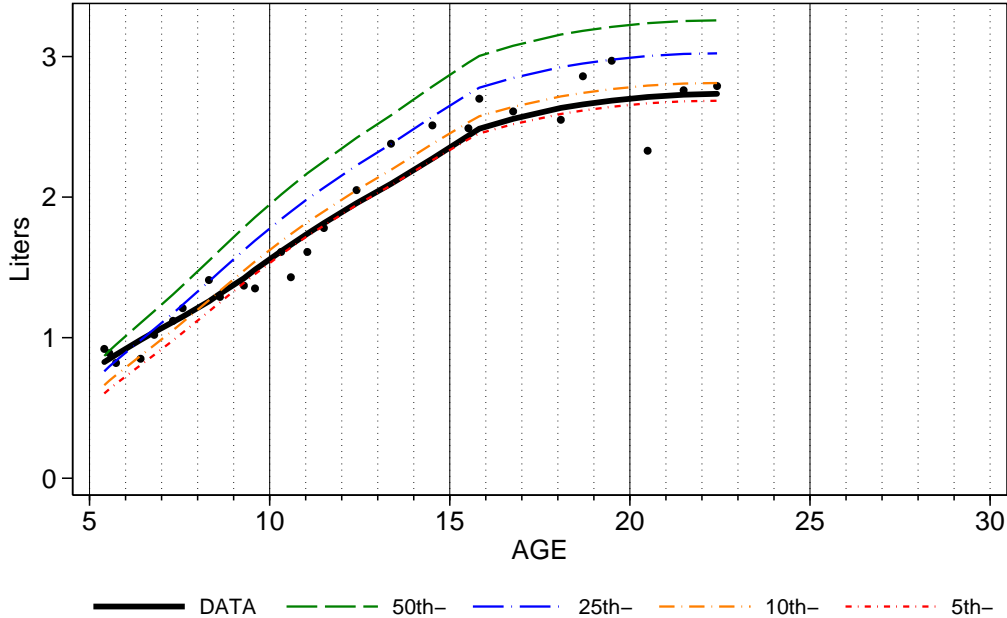

1313

**PATTERN OF GROWTH/DECLINE (Check One)**

- ( 1) Normal Growth
- ( 2) Normal Growth, Early Decline
- ( 3) Reduced Growth
- ( 4) Reduced Growth, Early Decline
- ( 9) Undetermined Pattern
- ( 8) Undetermined - not enough data

Maximum lung growth attained: ( 1) Yes ( 0) No

Plateau started: ( 2) No plateau ( 1) Yes ( 0) No

Decline started: ( 1) Yes ( 0) No

AGE AT each of the following periods (use '99' if N/A):

Maximum Lung Growth: \_\_\_\_ . \_\_\_\_

Start of Plateau: \_\_\_\_ . \_\_\_\_

Start of Decline: \_\_\_\_ . \_\_\_\_

### Pre-BD FEV1 Data and Percentiles: 1322

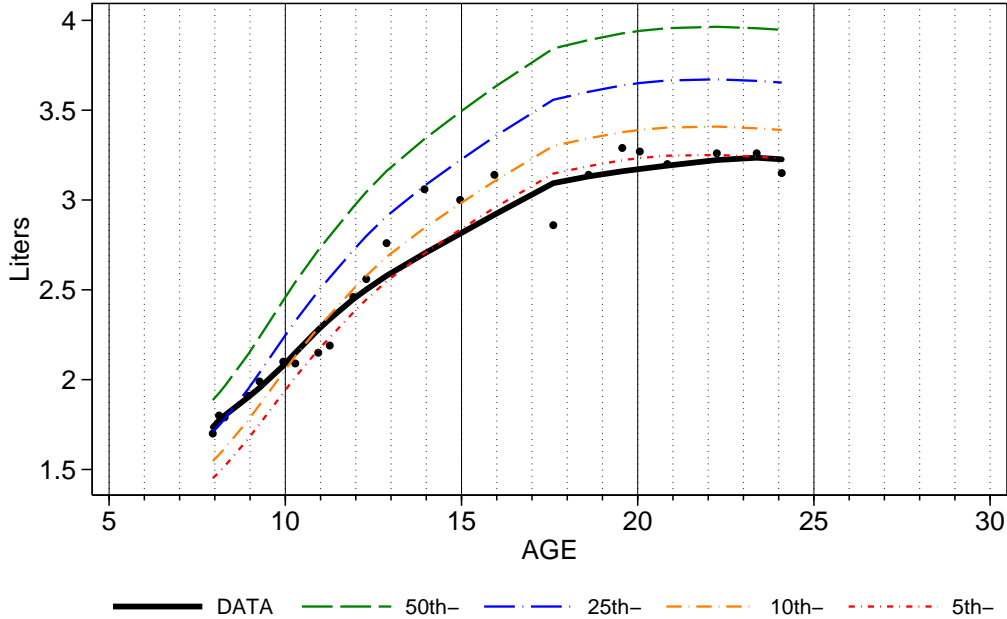

1322

**PATTERN OF GROWTH/DECLINE (Check One)**

- ( 1) Normal Growth
- ( 2) Normal Growth, Early Decline
- ( 3) Reduced Growth
- ( 4) Reduced Growth, Early Decline
- ( 9) Undetermined Pattern
- ( 8) Undetermined - not enough data

Maximum lung growth attained: ( 1) Yes ( 0) No

Plateau started: ( 2) No plateau ( 1) Yes ( 0) No

Decline started: ( 1) Yes ( 0) No

AGE AT each of the following periods (use '99' if N/A):

Maximum Lung Growth: \_\_\_\_ . \_\_\_\_

Start of Plateau: \_\_\_\_ . \_\_\_\_

Start of Decline: \_\_\_\_ . \_\_\_\_



### Pre-BD FEV1 Data and Percentiles: 1327

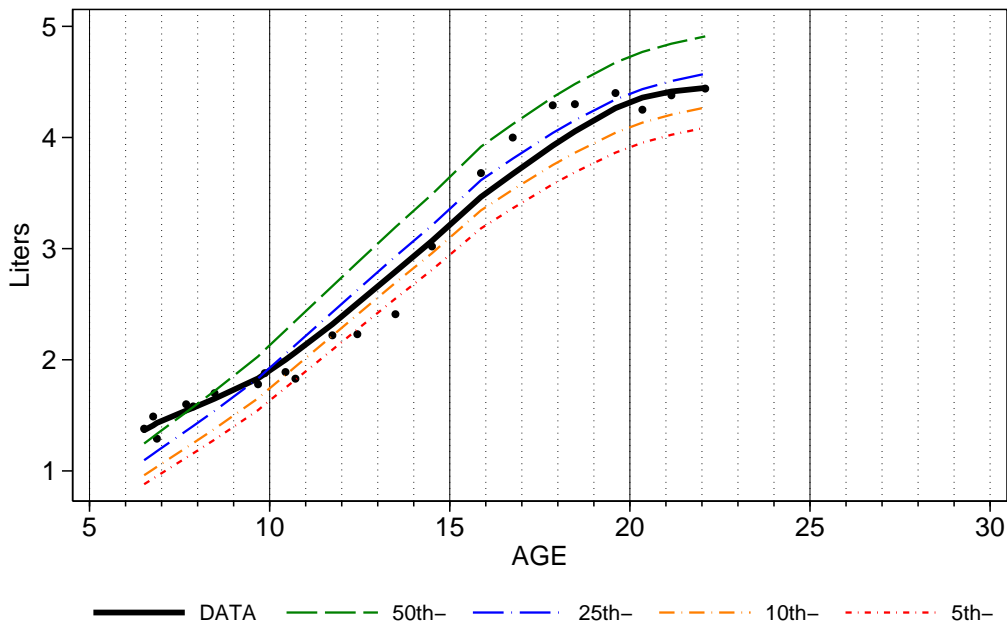

1327

**PATTERN OF GROWTH/DECLINE (Check One)**

- ( 1 ) Normal Growth
- ( 2 ) Normal Growth, Early Decline
- ( 3 ) Reduced Growth
- ( 4 ) Reduced Growth, Early Decline
- ( 9 ) Undetermined Pattern
- ( 8 ) Undetermined - not enough data

Maximum lung growth attained: ( 1 ) Yes ( 0 ) No

Plateau started: ( 2 ) No plateau ( 1 ) Yes ( 0 ) No

Decline started: ( 1 ) Yes ( 0 ) No

AGE AT each of the following periods (use '99' if N/A):

Maximum Lung Growth: \_\_\_\_ . \_\_\_\_

Start of Plateau: \_\_\_\_ . \_\_\_\_

Start of Decline: \_\_\_\_ . \_\_\_\_

### Pre-BD FEV1 Data and Percentiles: 1337

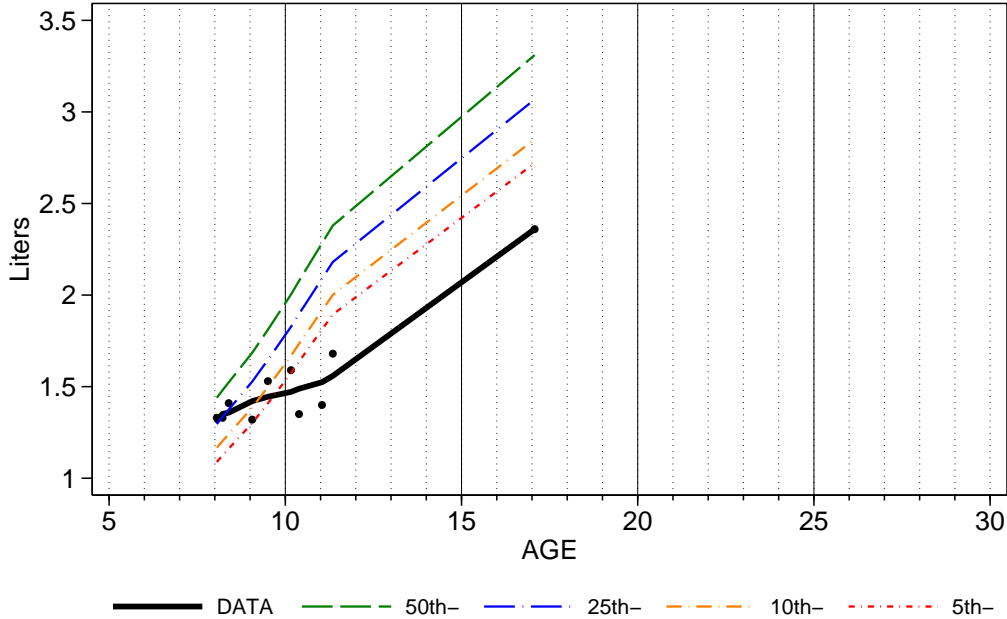

1337

**PATTERN OF GROWTH/DECLINE (Check One)**

- ( 1 ) Normal Growth
- ( 2 ) Normal Growth, Early Decline
- ( 3 ) Reduced Growth
- ( 4 ) Reduced Growth, Early Decline
- ( 9 ) Undetermined Pattern
- ( 8 ) Undetermined - not enough data

Maximum lung growth attained: ( 1 ) Yes ( 0 ) No

Plateau started: ( 2 ) No plateau ( 1 ) Yes ( 0 ) No

Decline started: ( 1 ) Yes ( 0 ) No

AGE AT each of the following periods (use '99' if N/A):

Maximum Lung Growth: \_\_\_\_ . \_\_\_\_

Start of Plateau: \_\_\_\_ . \_\_\_\_

Start of Decline: \_\_\_\_ . \_\_\_\_

### Pre-BD FEV1 Data and Percentiles: 1341

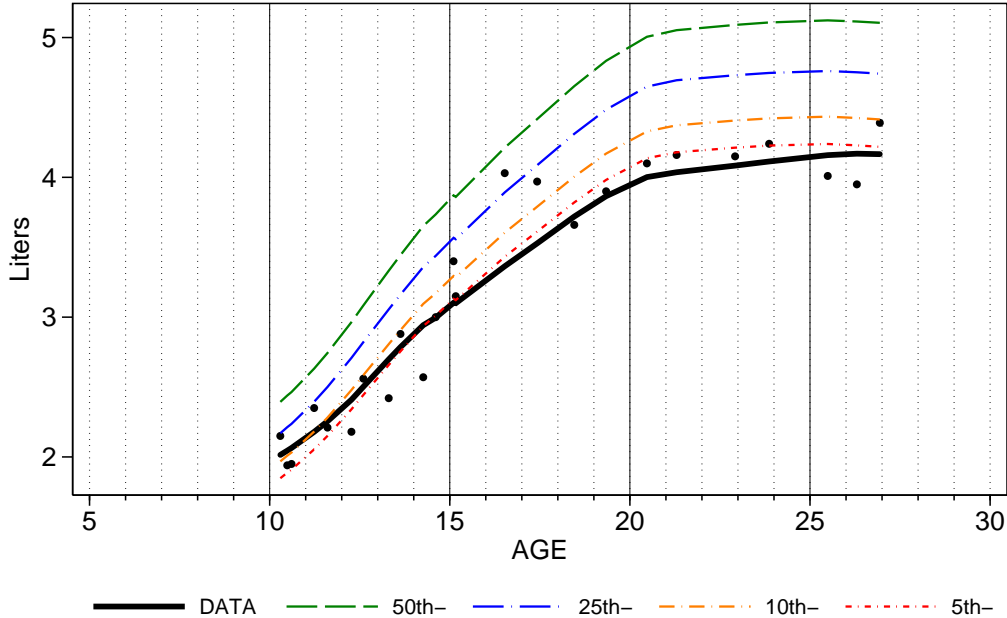

1341

**PATTERN OF GROWTH/DECLINE (Check One)**

- ( 1) Normal Growth
- ( 2) Normal Growth, Early Decline
- ( 3) Reduced Growth
- ( 4) Reduced Growth, Early Decline
- ( 9) Undetermined Pattern
- ( 8) Undetermined - not enough data

Maximum lung growth attained: ( 1) Yes ( 0) No

Plateau started: ( 2) No plateau ( 1) Yes ( 0) No

Decline started: ( 1) Yes ( 0) No

AGE AT each of the following periods (use '99' if N/A):

Maximum Lung Growth: \_\_\_\_ . \_\_\_\_

Start of Plateau: \_\_\_\_ . \_\_\_\_

Start of Decline: \_\_\_\_ . \_\_\_\_

### Pre-BD FEV1 Data and Percentiles: 1342

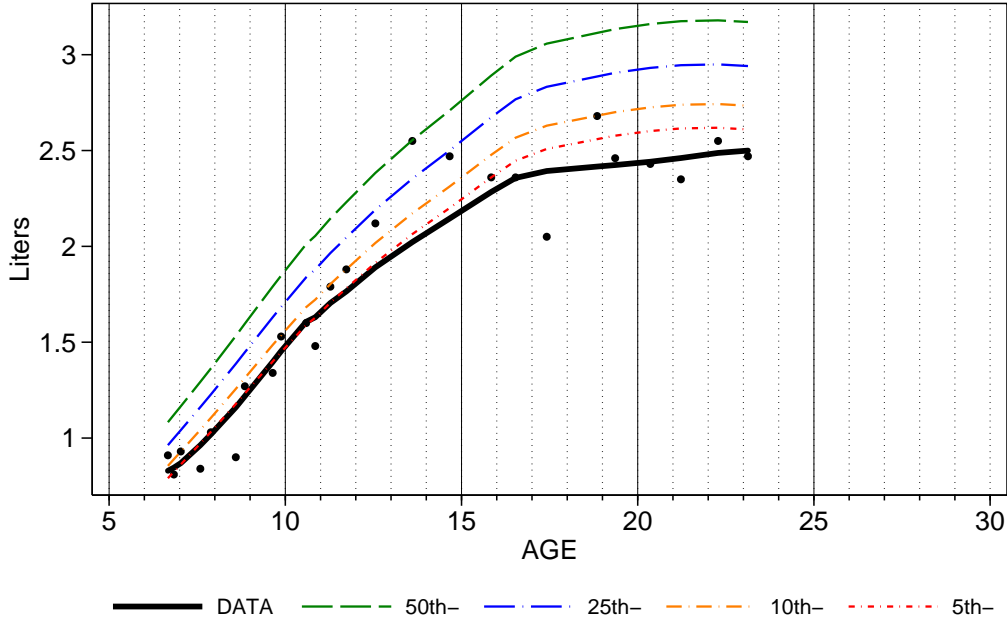

1342

**PATTERN OF GROWTH/DECLINE (Check One)**

- ( 1) Normal Growth
- ( 2) Normal Growth, Early Decline
- ( 3) Reduced Growth
- ( 4) Reduced Growth, Early Decline
- ( 9) Undetermined Pattern
- ( 8) Undetermined - not enough data

Maximum lung growth attained: ( 1) Yes ( 0) No

Plateau started: ( 2) No plateau ( 1) Yes ( 0) No

Decline started: ( 1) Yes ( 0) No

AGE AT each of the following periods (use '99' if N/A):

Maximum Lung Growth: \_\_\_\_ . \_\_\_\_

Start of Plateau: \_\_\_\_ . \_\_\_\_

Start of Decline: \_\_\_\_ . \_\_\_\_

### Pre-BD FEV1 Data and Percentiles: 1343

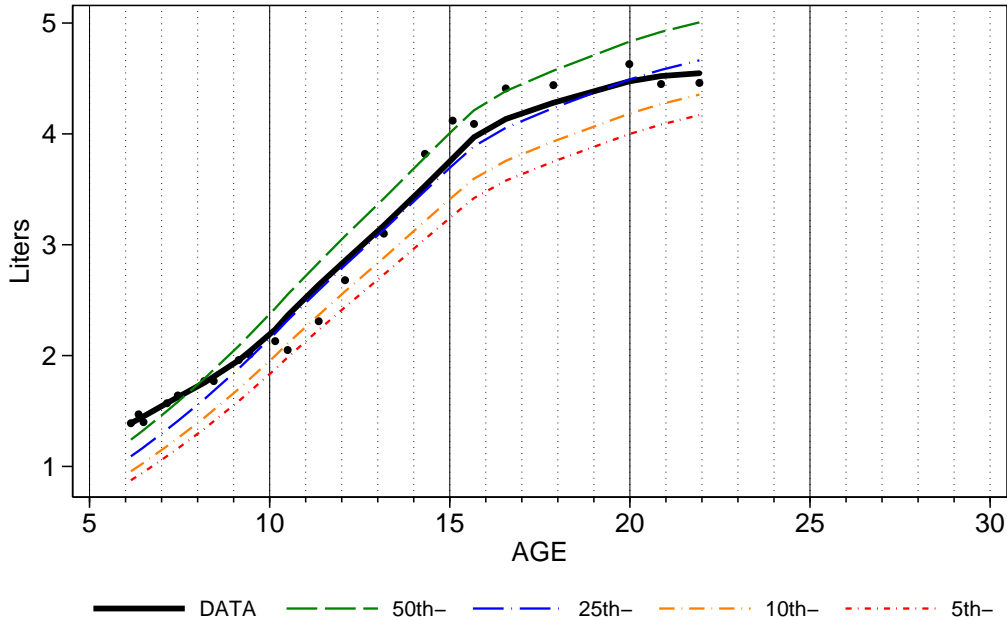

1343

**PATTERN OF GROWTH/DECLINE (Check One)**

- ( 1) Normal Growth
- ( 2) Normal Growth, Early Decline
- ( 3) Reduced Growth
- ( 4) Reduced Growth, Early Decline
- ( 9) Undetermined Pattern
- ( 8) Undetermined - not enough data

Maximum lung growth attained: ( 1) Yes ( 0) No

Plateau started: ( 2) No plateau ( 1) Yes ( 0) No

Decline started: ( 1) Yes ( 0) No

AGE AT each of the following periods (use '99' if N/A):

Maximum Lung Growth: \_\_\_\_ . \_\_\_\_

Start of Plateau: \_\_\_\_ . \_\_\_\_

Start of Decline: \_\_\_\_ . \_\_\_\_

### Pre-BD FEV1 Data and Percentiles: 1344

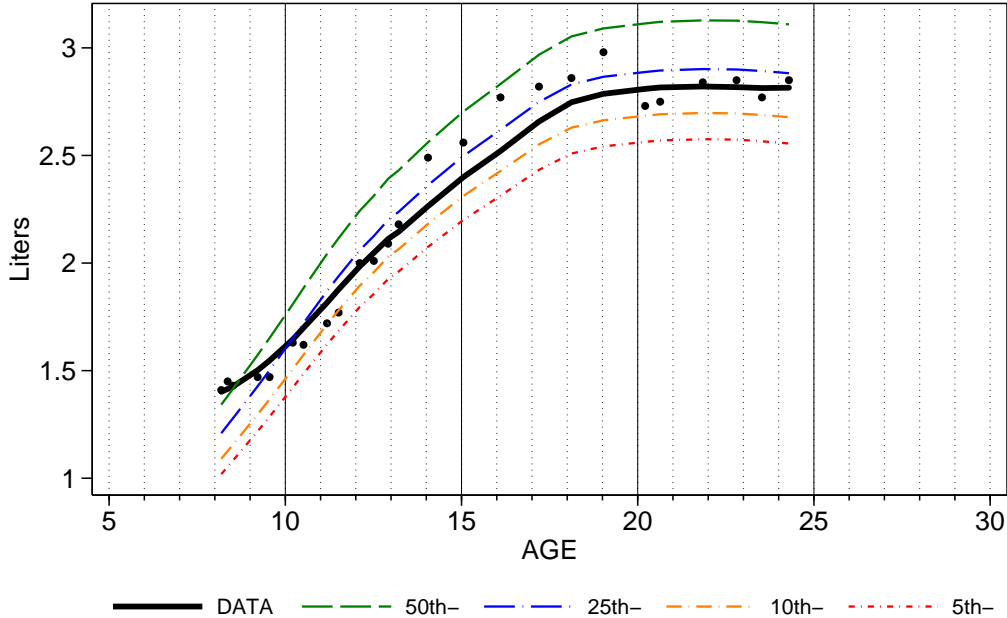

1344

**PATTERN OF GROWTH/DECLINE (Check One)**

- ( 1 ) Normal Growth
- ( 2 ) Normal Growth, Early Decline
- ( 3 ) Reduced Growth
- ( 4 ) Reduced Growth, Early Decline
- ( 9 ) Undetermined Pattern
- ( 8 ) Undetermined - not enough data

Maximum lung growth attained: ( 1 ) Yes ( 0 ) No

Plateau started: ( 2 ) No plateau ( 1 ) Yes ( 0 ) No

Decline started: ( 1 ) Yes ( 0 ) No

AGE AT each of the following periods (use '99' if N/A):

Maximum Lung Growth: \_\_\_\_ . \_\_\_\_

Start of Plateau: \_\_\_\_ . \_\_\_\_

Start of Decline: \_\_\_\_ . \_\_\_\_

### Pre-BD FEV1 Data and Percentiles: 1347

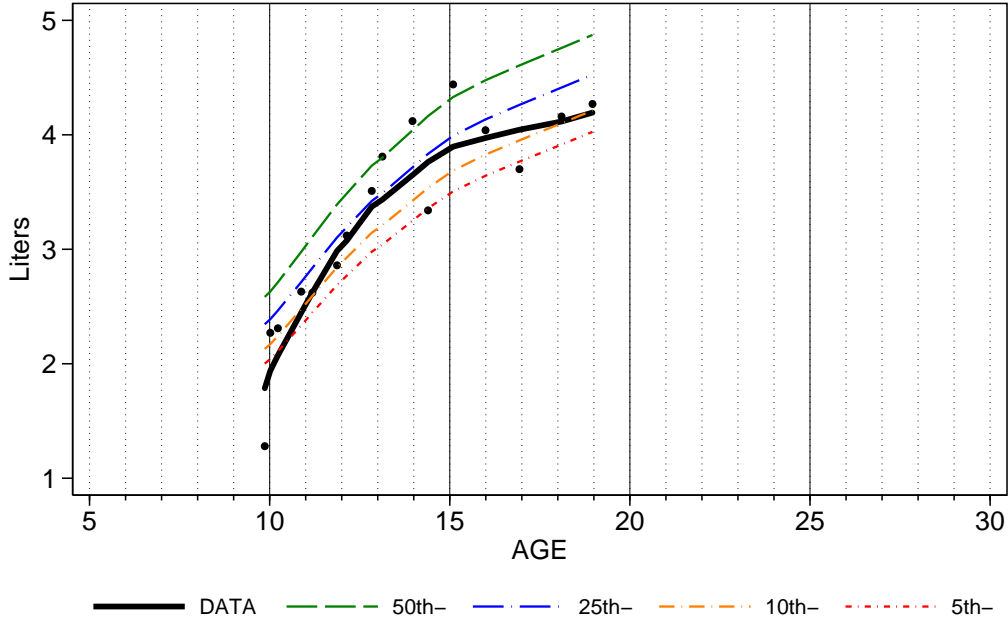

1347

**PATTERN OF GROWTH/DECLINE (Check One)**

- ( 1) Normal Growth
- ( 2) Normal Growth, Early Decline
- ( 3) Reduced Growth
- ( 4) Reduced Growth, Early Decline
- ( 9) Undetermined Pattern
- ( 8) Undetermined - not enough data

Maximum lung growth attained: ( 1) Yes ( 0) No

Plateau started: ( 2) No plateau ( 1) Yes ( 0) No

Decline started: ( 1) Yes ( 0) No

AGE AT each of the following periods (use '99' if N/A):

Maximum Lung Growth: \_\_\_\_ . \_\_\_\_

Start of Plateau: \_\_\_\_ . \_\_\_\_

Start of Decline: \_\_\_\_ . \_\_\_\_

### Pre-BD FEV1 Data and Percentiles: 1351

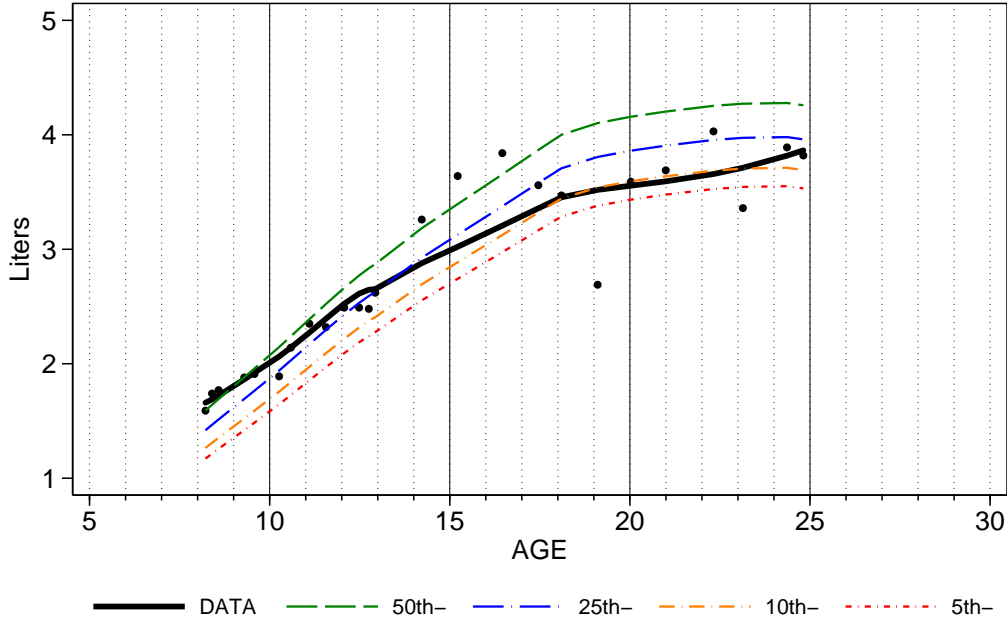

1351

**PATTERN OF GROWTH/DECLINE (Check One)**

- ( 1 ) Normal Growth
- ( 2 ) Normal Growth, Early Decline
- ( 3 ) Reduced Growth
- ( 4 ) Reduced Growth, Early Decline
- ( 9 ) Undetermined Pattern
- ( 8 ) Undetermined - not enough data

Maximum lung growth attained: ( 1 ) Yes ( 0 ) No

Plateau started: ( 2 ) No plateau ( 1 ) Yes ( 0 ) No

Decline started: ( 1 ) Yes ( 0 ) No

AGE AT each of the following periods (use '99' if N/A):

Maximum Lung Growth: \_\_\_\_ . \_\_\_\_

Start of Plateau: \_\_\_\_ . \_\_\_\_

Start of Decline: \_\_\_\_ . \_\_\_\_



### Pre-BD FEV1 Data and Percentiles: 1354

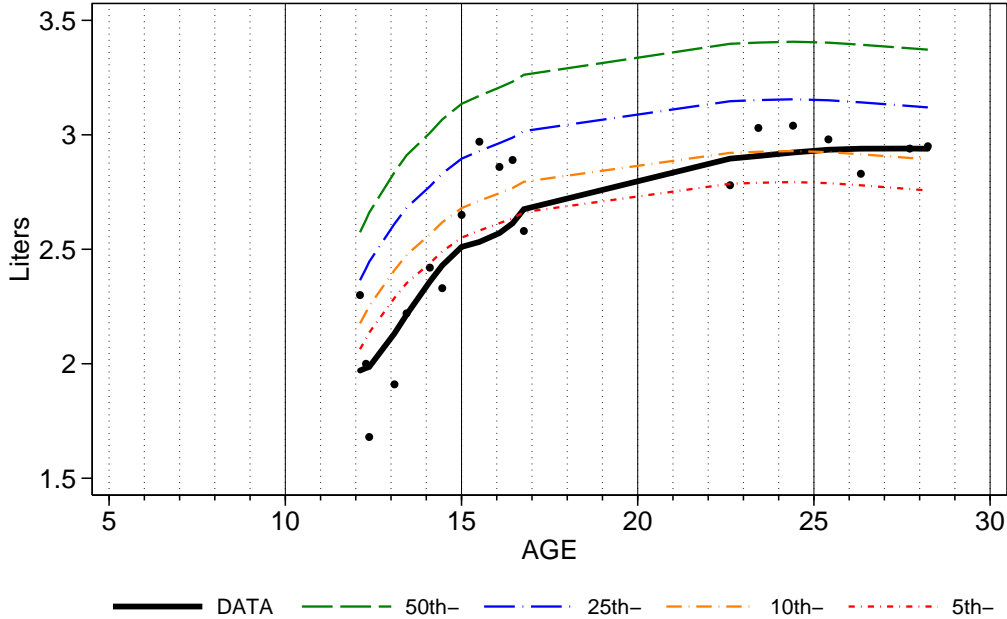

1354

**PATTERN OF GROWTH/DECLINE (Check One)**

- ( 1) Normal Growth
- ( 2) Normal Growth, Early Decline
- ( 3) Reduced Growth
- ( 4) Reduced Growth, Early Decline
- ( 9) Undetermined Pattern
- ( 8) Undetermined - not enough data

Maximum lung growth attained: ( 1) Yes ( 0) No

Plateau started: ( 2) No plateau ( 1) Yes ( 0) No

Decline started: ( 1) Yes ( 0) No

AGE AT each of the following periods (use '99' if N/A):

Maximum Lung Growth: \_\_\_\_ . \_\_\_\_

Start of Plateau: \_\_\_\_ . \_\_\_\_

Start of Decline: \_\_\_\_ . \_\_\_\_

### Pre-BD FEV1 Data and Percentiles: 1356

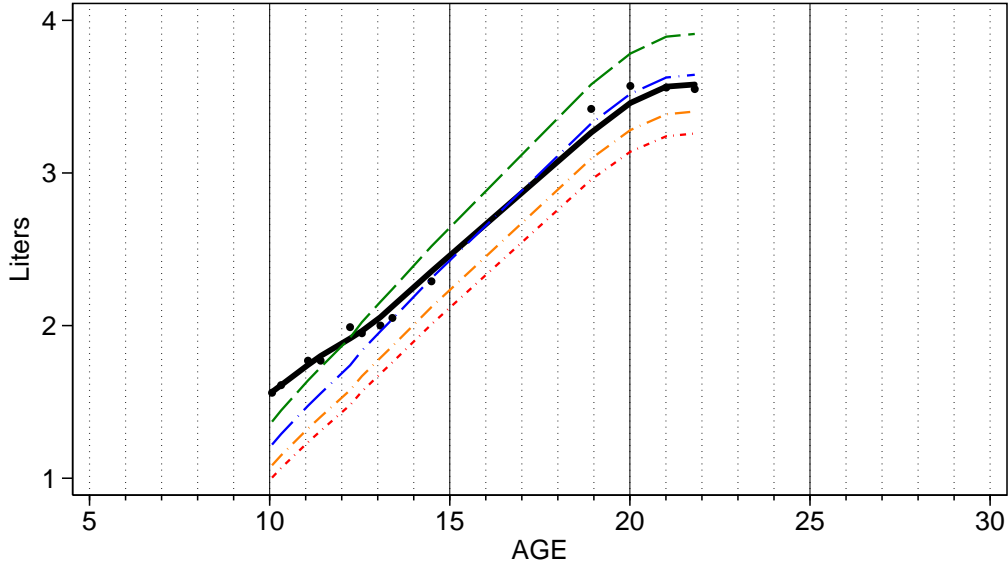

DATA  
  50th-  
  25th-  
  10th-  
  5th-

1356

**PATTERN OF GROWTH/DECLINE (Check One)**

- ( 1 ) Normal Growth
- ( 2 ) Normal Growth, Early Decline
- ( 3 ) Reduced Growth
- ( 4 ) Reduced Growth, Early Decline
- ( 9 ) Undetermined Pattern
- ( 8 ) Undetermined - not enough data

Maximum lung growth attained: ( 1 ) Yes ( 0 ) No

Plateau started: ( 2 ) No plateau ( 1 ) Yes ( 0 ) No

Decline started: ( 1 ) Yes ( 0 ) No

AGE AT each of the following periods (use '99' if N/A):

Maximum Lung Growth: \_\_\_\_ . \_\_\_\_

Start of Plateau: \_\_\_\_ . \_\_\_\_

Start of Decline: \_\_\_\_ . \_\_\_\_

### Pre-BD FEV1 Data and Percentiles: 1357

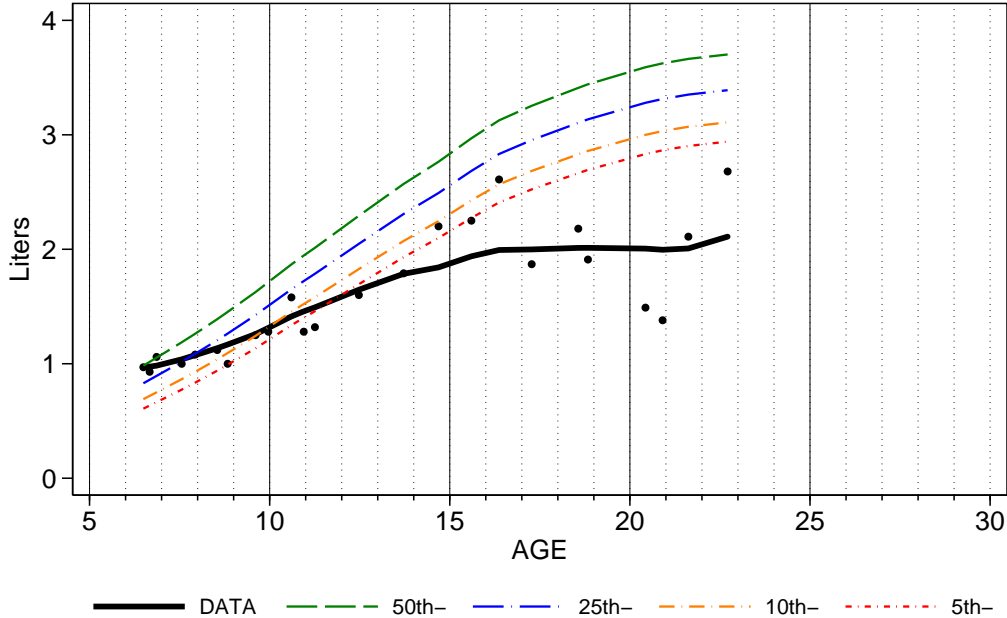

1357

**PATTERN OF GROWTH/DECLINE (Check One)**

- ( 1 ) Normal Growth
- ( 2 ) Normal Growth, Early Decline
- ( 3 ) Reduced Growth
- ( 4 ) Reduced Growth, Early Decline
- ( 9 ) Undetermined Pattern
- ( 8 ) Undetermined - not enough data

Maximum lung growth attained: ( 1 ) Yes ( 0 ) No

Plateau started: ( 2 ) No plateau ( 1 ) Yes ( 0 ) No

Decline started: ( 1 ) Yes ( 0 ) No

AGE AT each of the following periods (use '99' if N/A):

Maximum Lung Growth: \_\_\_\_ . \_\_\_\_

Start of Plateau: \_\_\_\_ . \_\_\_\_

Start of Decline: \_\_\_\_ . \_\_\_\_

### Pre-BD FEV1 Data and Percentiles: 1358

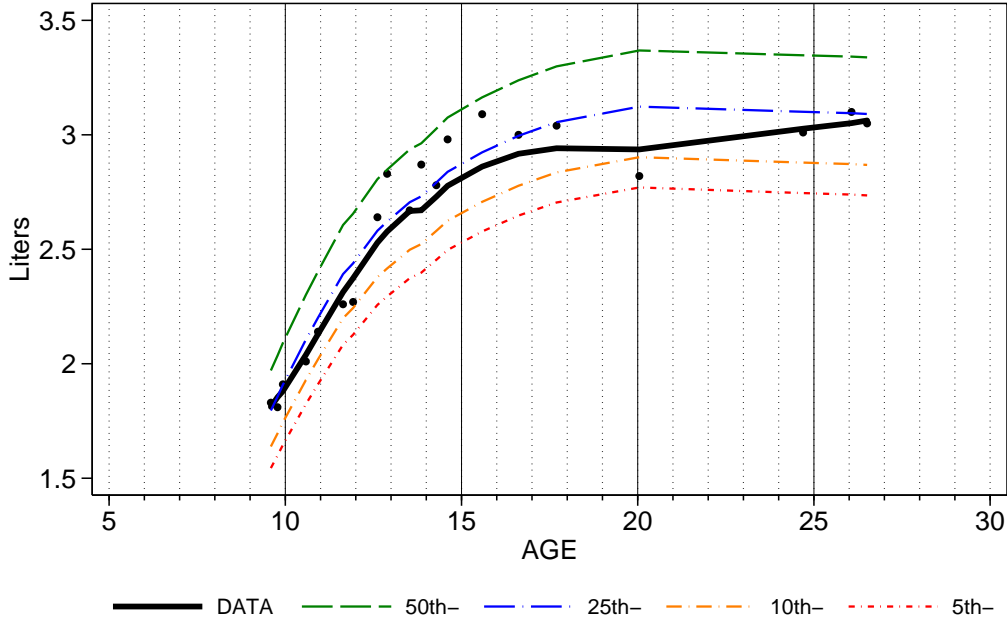

1358

**PATTERN OF GROWTH/DECLINE (Check One)**

- ( 1) Normal Growth
- ( 2) Normal Growth, Early Decline
- ( 3) Reduced Growth
- ( 4) Reduced Growth, Early Decline
- ( 9) Undetermined Pattern
- ( 8) Undetermined - not enough data

Maximum lung growth attained: ( 1) Yes ( 0) No

Plateau started: ( 2) No plateau ( 1) Yes ( 0) No

Decline started: ( 1) Yes ( 0) No

AGE AT each of the following periods (use '99' if N/A):

Maximum Lung Growth: \_\_\_\_ . \_\_\_\_

Start of Plateau: \_\_\_\_ . \_\_\_\_

Start of Decline: \_\_\_\_ . \_\_\_\_

### Pre-BD FEV1 Data and Percentiles: 1362

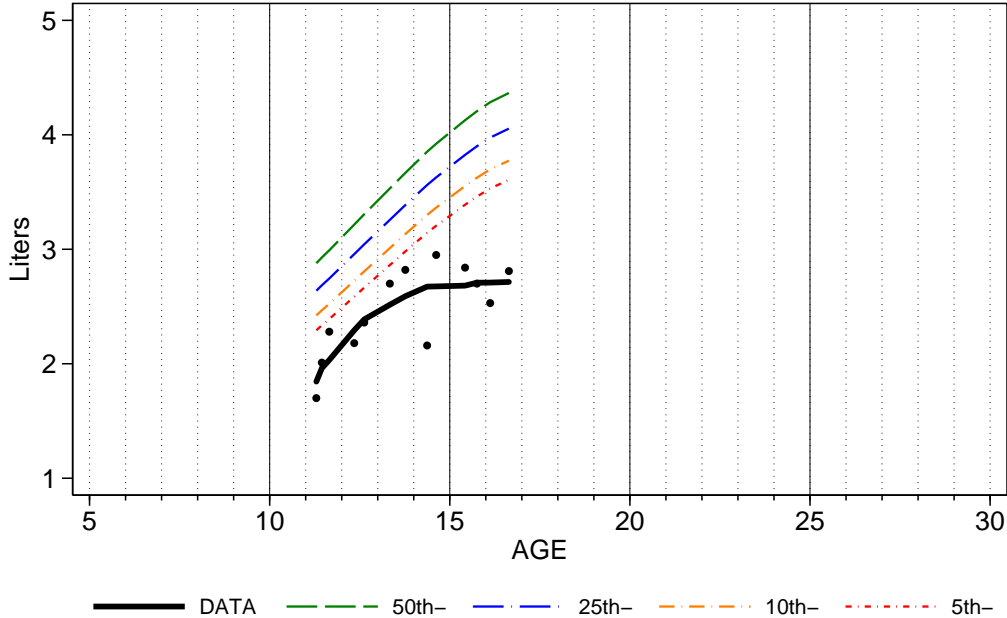

1362

**PATTERN OF GROWTH/DECLINE (Check One)**

- ( 1) Normal Growth
- ( 2) Normal Growth, Early Decline
- ( 3) Reduced Growth
- ( 4) Reduced Growth, Early Decline
- ( 9) Undetermined Pattern
- ( 8) Undetermined - not enough data

Maximum lung growth attained: ( 1) Yes ( 0) No

Plateau started: ( 2) No plateau ( 1) Yes ( 0) No

Decline started: ( 1) Yes ( 0) No

AGE AT each of the following periods (use '99' if N/A):

Maximum Lung Growth: \_\_\_\_ . \_\_\_\_

Start of Plateau: \_\_\_\_ . \_\_\_\_

Start of Decline: \_\_\_\_ . \_\_\_\_

### Pre-BD FEV1 Data and Percentiles: 1364

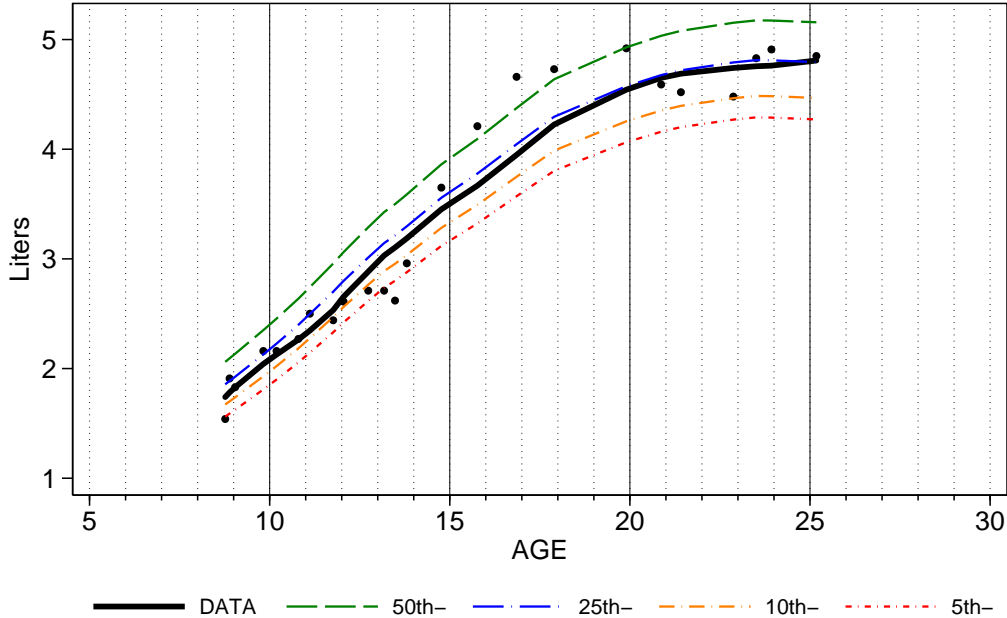

1364

**PATTERN OF GROWTH/DECLINE (Check One)**

- ( 1) Normal Growth
- ( 2) Normal Growth, Early Decline
- ( 3) Reduced Growth
- ( 4) Reduced Growth, Early Decline
- ( 9) Undetermined Pattern
- ( 8) Undetermined - not enough data

Maximum lung growth attained: ( 1) Yes ( 0) No

Plateau started: ( 2) No plateau ( 1) Yes ( 0) No

Decline started: ( 1) Yes ( 0) No

AGE AT each of the following periods (use '99' if N/A):

Maximum Lung Growth: \_\_\_\_ . \_\_\_\_

Start of Plateau: \_\_\_\_ . \_\_\_\_

Start of Decline: \_\_\_\_ . \_\_\_\_

### Pre-BD FEV1 Data and Percentiles: 1367

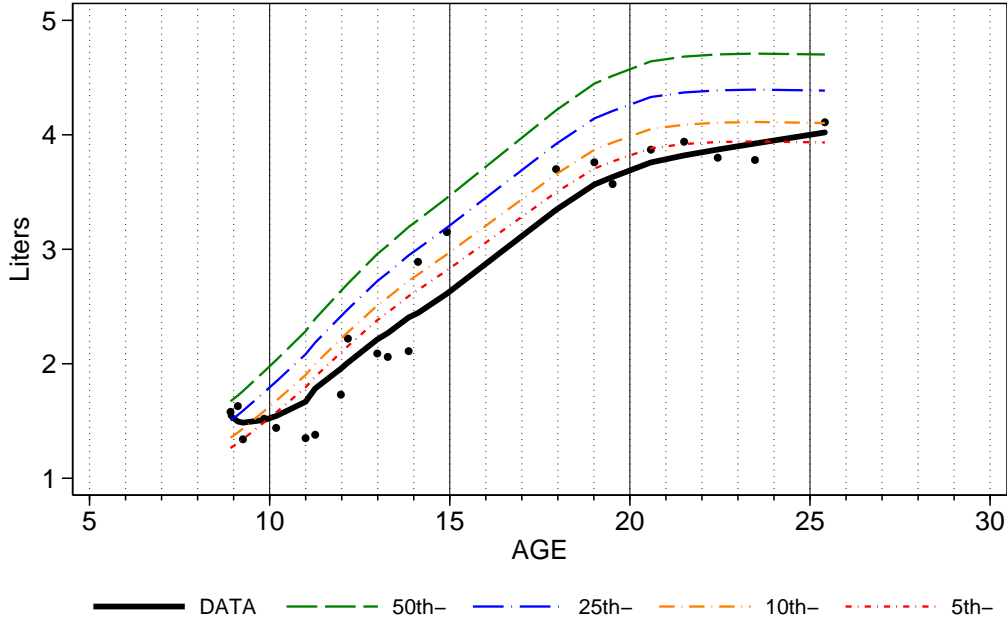

1367

**PATTERN OF GROWTH/DECLINE (Check One)**

- ( 1) Normal Growth
- ( 2) Normal Growth, Early Decline
- ( 3) Reduced Growth
- ( 4) Reduced Growth, Early Decline
- ( 9) Undetermined Pattern
- ( 8) Undetermined - not enough data

Maximum lung growth attained: ( 1) Yes ( 0) No

Plateau started: ( 2) No plateau ( 1) Yes ( 0) No

Decline started: ( 1) Yes ( 0) No

AGE AT each of the following periods (use '99' if N/A):

Maximum Lung Growth: \_\_\_\_ . \_\_\_\_

Start of Plateau: \_\_\_\_ . \_\_\_\_

Start of Decline: \_\_\_\_ . \_\_\_\_

### Pre-BD FEV1 Data and Percentiles: 1368

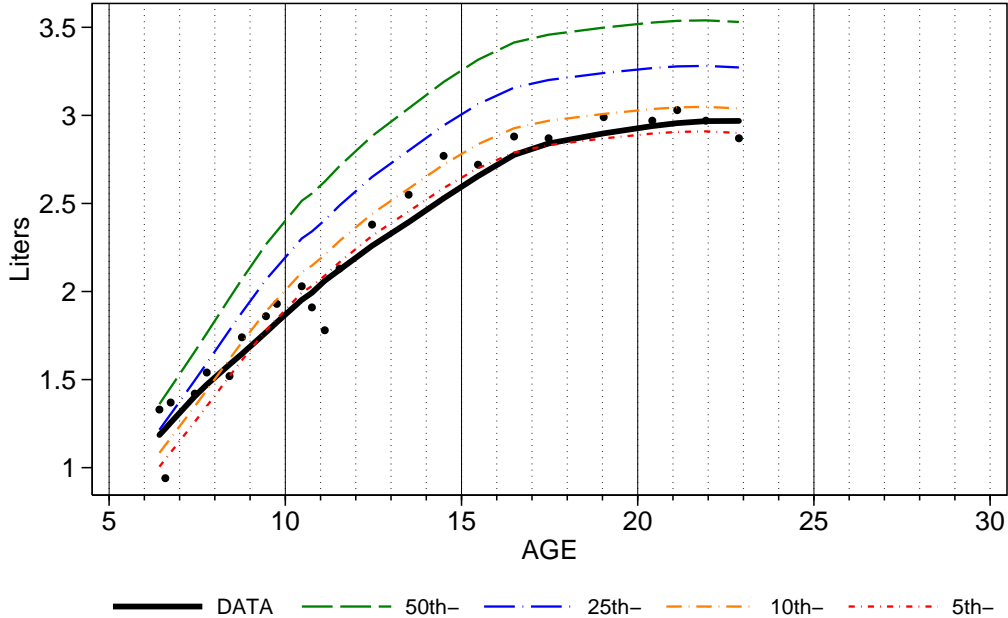

1368

**PATTERN OF GROWTH/DECLINE (Check One)**

- ( 1) Normal Growth
- ( 2) Normal Growth, Early Decline
- ( 3) Reduced Growth
- ( 4) Reduced Growth, Early Decline
- ( 9) Undetermined Pattern
- ( 8) Undetermined - not enough data

Maximum lung growth attained: ( 1) Yes ( 0) No

Plateau started: ( 2) No plateau ( 1) Yes ( 0) No

Decline started: ( 1) Yes ( 0) No

AGE AT each of the following periods (use '99' if N/A):

Maximum Lung Growth: \_\_\_\_ . \_\_\_\_

Start of Plateau: \_\_\_\_ . \_\_\_\_

Start of Decline: \_\_\_\_ . \_\_\_\_



### Pre-BD FEV1 Data and Percentiles: 1372

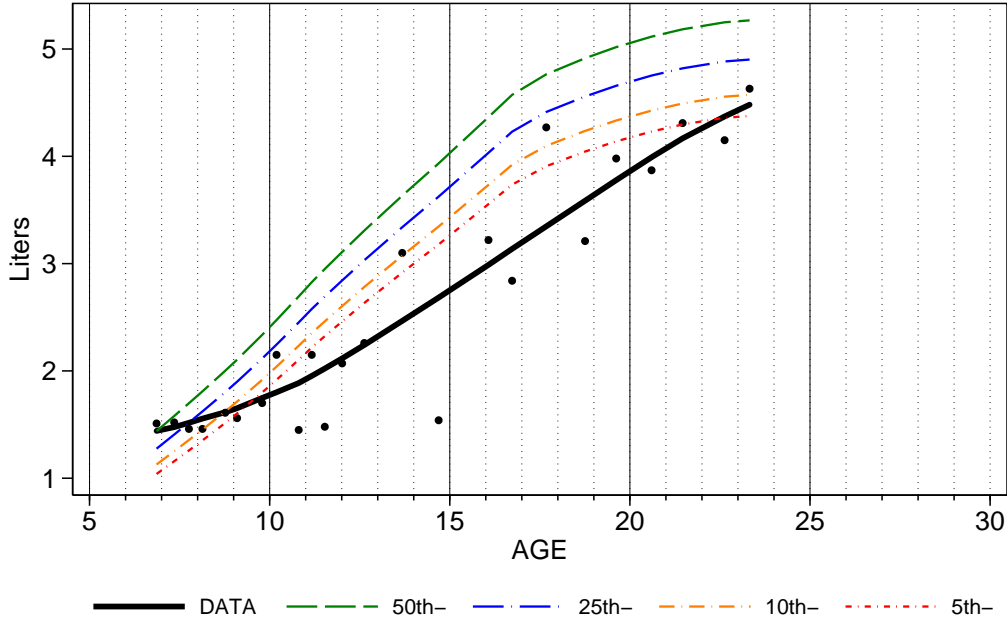

1372

**PATTERN OF GROWTH/DECLINE (Check One)**

- ( 1) Normal Growth
- ( 2) Normal Growth, Early Decline
- ( 3) Reduced Growth
- ( 4) Reduced Growth, Early Decline
- ( 9) Undetermined Pattern
- ( 8) Undetermined - not enough data

Maximum lung growth attained: ( 1) Yes ( 0) No

Plateau started: ( 2) No plateau ( 1) Yes ( 0) No

Decline started: ( 1) Yes ( 0) No

AGE AT each of the following periods (use '99' if N/A):

Maximum Lung Growth: \_\_\_\_ . \_\_\_\_

Start of Plateau: \_\_\_\_ . \_\_\_\_

Start of Decline: \_\_\_\_ . \_\_\_\_

### Pre-BD FEV1 Data and Percentiles: 1374

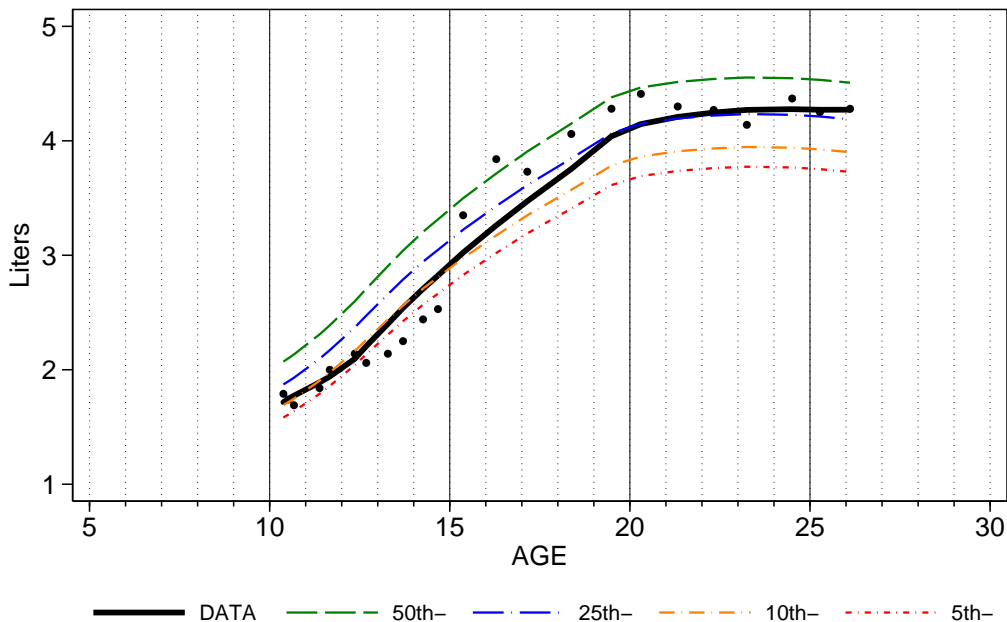

1374

**PATTERN OF GROWTH/DECLINE (Check One)**

- ( 1) Normal Growth
- ( 2) Normal Growth, Early Decline
- ( 3) Reduced Growth
- ( 4) Reduced Growth, Early Decline
- ( 9) Undetermined Pattern
- ( 8) Undetermined - not enough data

Maximum lung growth attained: ( 1) Yes ( 0) No

Plateau started: ( 2) No plateau ( 1) Yes ( 0) No

Decline started: ( 1) Yes ( 0) No

AGE AT each of the following periods (use '99' if N/A):

Maximum Lung Growth: \_\_\_\_ . \_\_\_\_

Start of Plateau: \_\_\_\_ . \_\_\_\_

Start of Decline: \_\_\_\_ . \_\_\_\_

### Pre-BD FEV1 Data and Percentiles: 1376

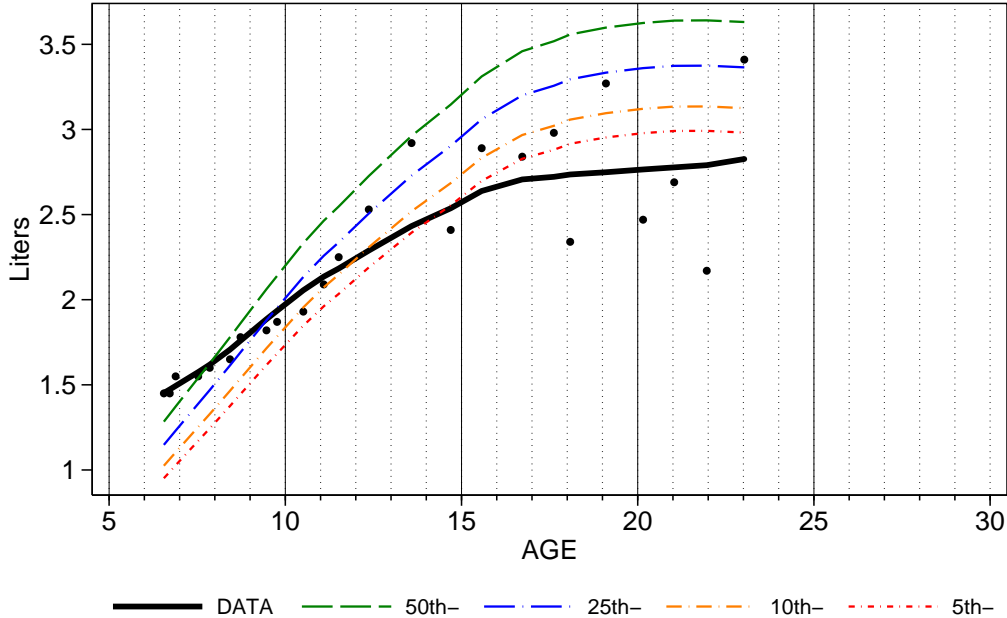

1376

**PATTERN OF GROWTH/DECLINE (Check One)**

- ( 1 ) Normal Growth
- ( 2 ) Normal Growth, Early Decline
- ( 3 ) Reduced Growth
- ( 4 ) Reduced Growth, Early Decline
- ( 9 ) Undetermined Pattern
- ( 8 ) Undetermined - not enough data

Maximum lung growth attained: ( 1 ) Yes ( 0 ) No

Plateau started: ( 2 ) No plateau ( 1 ) Yes ( 0 ) No

Decline started: ( 1 ) Yes ( 0 ) No

AGE AT each of the following periods (use '99' if N/A):

Maximum Lung Growth: \_\_\_\_ . \_\_\_\_

Start of Plateau: \_\_\_\_ . \_\_\_\_

Start of Decline: \_\_\_\_ . \_\_\_\_

### Pre-BD FEV1 Data and Percentiles: 1377

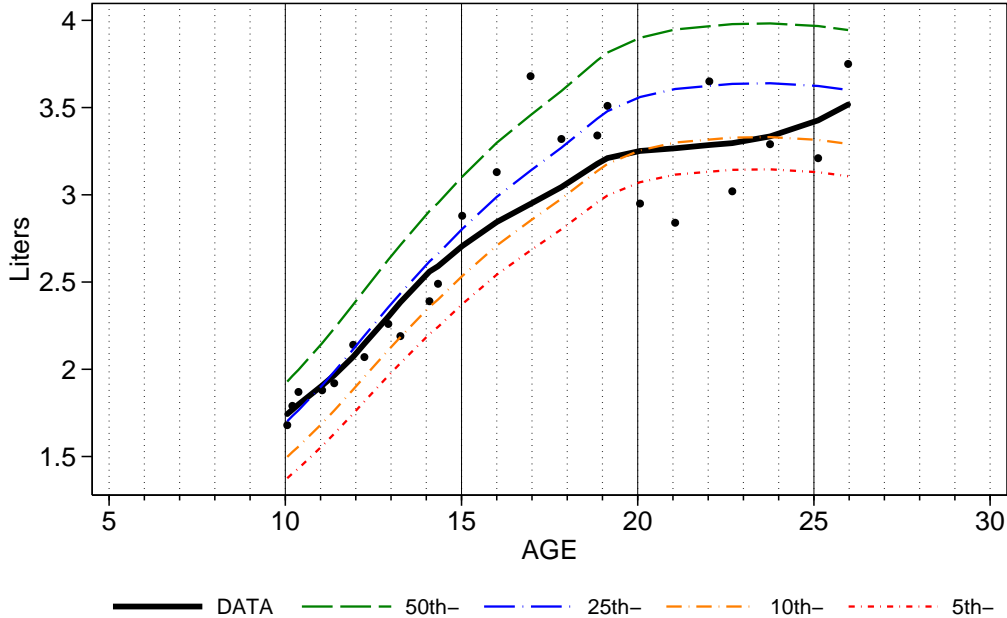

1377

**PATTERN OF GROWTH/DECLINE (Check One)**

- ( 1) Normal Growth
- ( 2) Normal Growth, Early Decline
- ( 3) Reduced Growth
- ( 4) Reduced Growth, Early Decline
- ( 9) Undetermined Pattern
- ( 8) Undetermined - not enough data

Maximum lung growth attained: ( 1) Yes ( 0) No

Plateau started: ( 2) No plateau ( 1) Yes ( 0) No

Decline started: ( 1) Yes ( 0) No

AGE AT each of the following periods (use '99' if N/A):

Maximum Lung Growth: \_\_\_\_ . \_\_\_\_

Start of Plateau: \_\_\_\_ . \_\_\_\_

Start of Decline: \_\_\_\_ . \_\_\_\_

### Pre-BD FEV1 Data and Percentiles: 1383

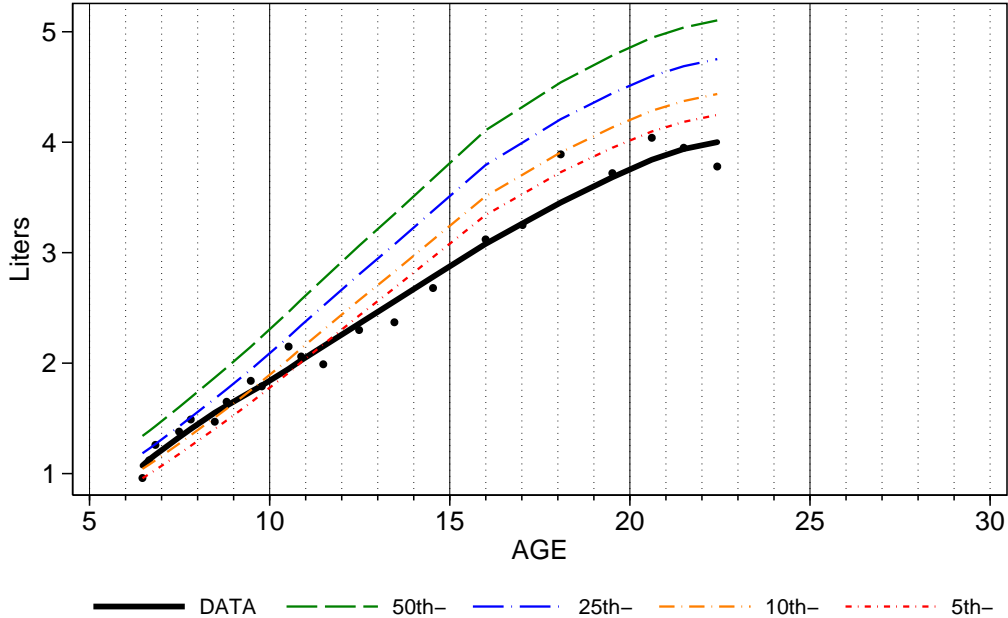

1383

**PATTERN OF GROWTH/DECLINE (Check One)**

- ( 1) Normal Growth
- ( 2) Normal Growth, Early Decline
- ( 3) Reduced Growth
- ( 4) Reduced Growth, Early Decline
- ( 9) Undetermined Pattern
- ( 8) Undetermined - not enough data

Maximum lung growth attained: ( 1) Yes ( 0) No

Plateau started: ( 2) No plateau ( 1) Yes ( 0) No

Decline started: ( 1) Yes ( 0) No

AGE AT each of the following periods (use '99' if N/A):

Maximum Lung Growth: \_\_\_\_ . \_\_\_\_

Start of Plateau: \_\_\_\_ . \_\_\_\_

Start of Decline: \_\_\_\_ . \_\_\_\_

### Pre-BD FEV1 Data and Percentiles: 1384

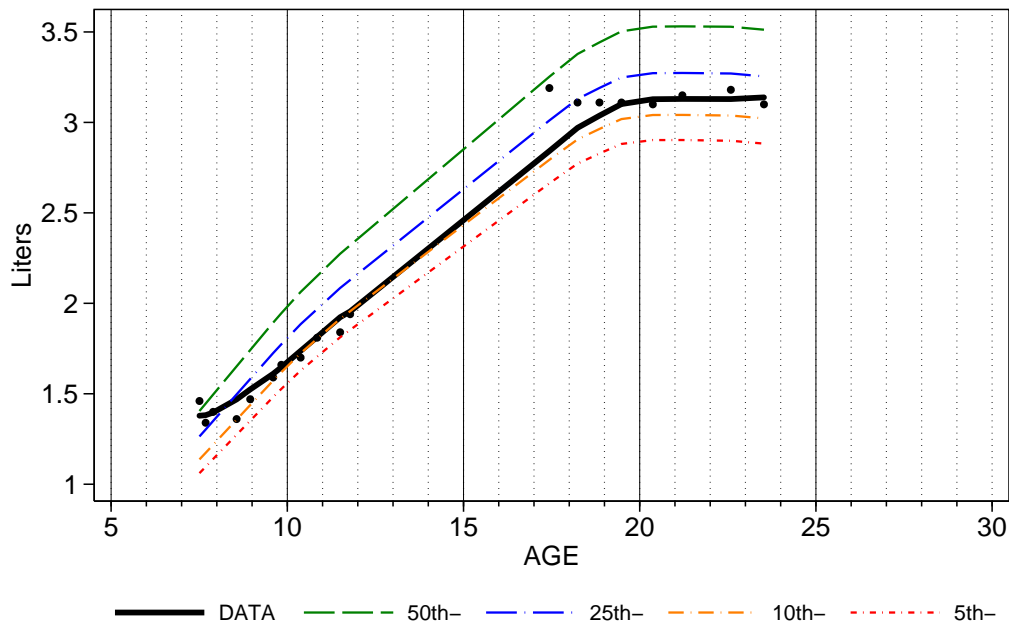

1384

**PATTERN OF GROWTH/DECLINE (Check One)**

- ( 1 ) Normal Growth
- ( 2 ) Normal Growth, Early Decline
- ( 3 ) Reduced Growth
- ( 4 ) Reduced Growth, Early Decline
- ( 9 ) Undetermined Pattern
- ( 8 ) Undetermined - not enough data

Maximum lung growth attained: ( 1 ) Yes ( 0 ) No

Plateau started: ( 2 ) No plateau ( 1 ) Yes ( 0 ) No

Decline started: ( 1 ) Yes ( 0 ) No

AGE AT each of the following periods (use '99' if N/A):

Maximum Lung Growth: \_\_\_\_ . \_\_\_\_

Start of Plateau: \_\_\_\_ . \_\_\_\_

Start of Decline: \_\_\_\_ . \_\_\_\_

### Pre-BD FEV1 Data and Percentiles: 1385

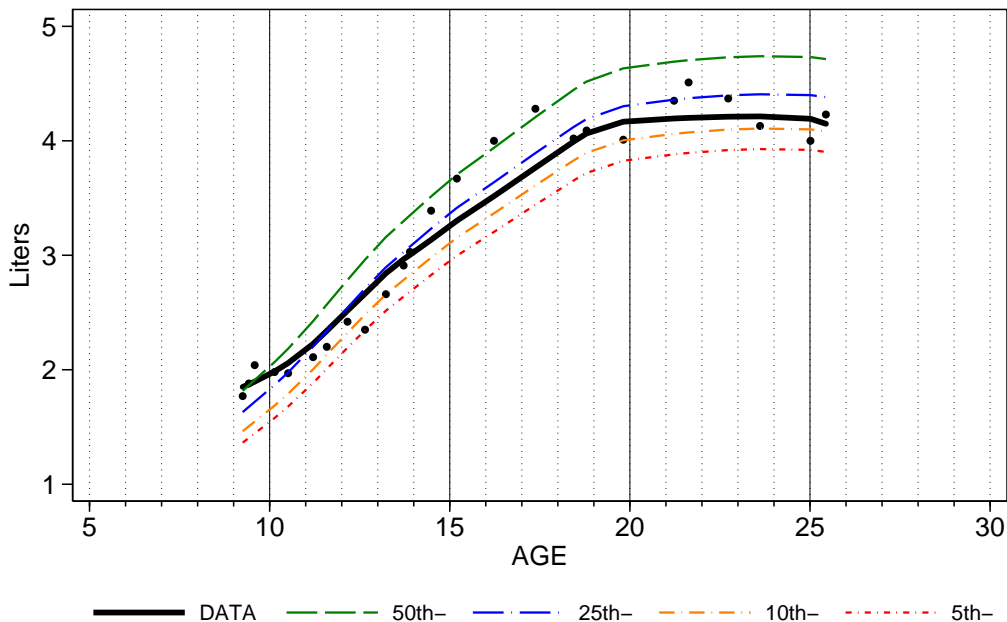

1385

**PATTERN OF GROWTH/DECLINE (Check One)**

- ( 1) Normal Growth
- ( 2) Normal Growth, Early Decline
- ( 3) Reduced Growth
- ( 4) Reduced Growth, Early Decline
- ( 9) Undetermined Pattern
- ( 8) Undetermined - not enough data

Maximum lung growth attained: ( 1) Yes ( 0) No

Plateau started: ( 2) No plateau ( 1) Yes ( 0) No

Decline started: ( 1) Yes ( 0) No

AGE AT each of the following periods (use '99' if N/A):

Maximum Lung Growth: \_\_\_\_ . \_\_\_\_

Start of Plateau: \_\_\_\_ . \_\_\_\_

Start of Decline: \_\_\_\_ . \_\_\_\_

### Pre-BD FEV1 Data and Percentiles: 1390

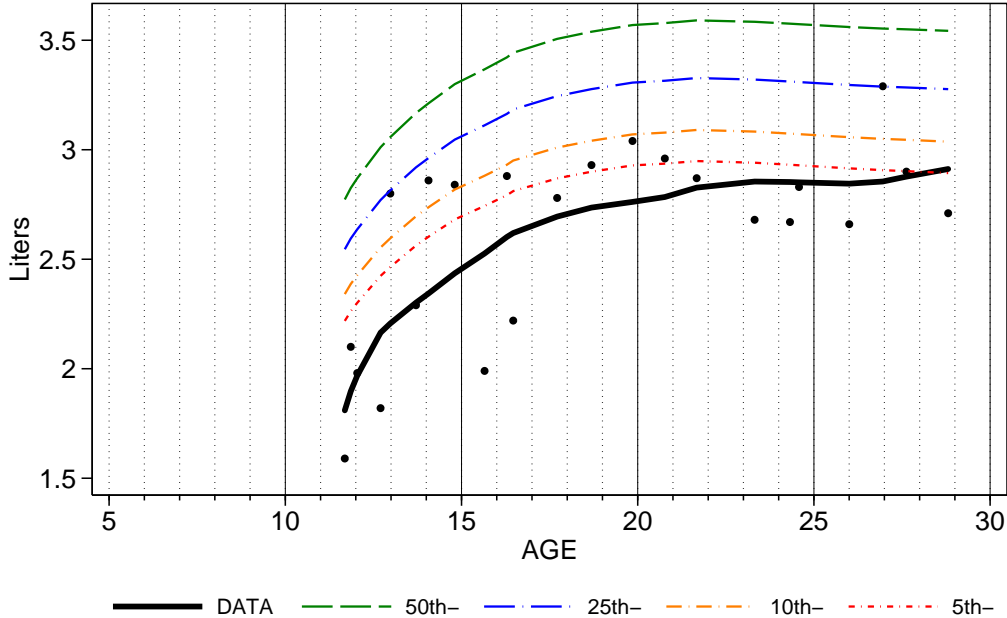

1390

**PATTERN OF GROWTH/DECLINE (Check One)**

- ( 1) Normal Growth
- ( 2) Normal Growth, Early Decline
- ( 3) Reduced Growth
- ( 4) Reduced Growth, Early Decline
- ( 9) Undetermined Pattern
- ( 8) Undetermined - not enough data

Maximum lung growth attained: ( 1) Yes ( 0) No

Plateau started: ( 2) No plateau ( 1) Yes ( 0) No

Decline started: ( 1) Yes ( 0) No

AGE AT each of the following periods (use '99' if N/A):

Maximum Lung Growth: \_\_\_\_ . \_\_\_\_

Start of Plateau: \_\_\_\_ . \_\_\_\_

Start of Decline: \_\_\_\_ . \_\_\_\_



### Pre-BD FEV1 Data and Percentiles: 1393

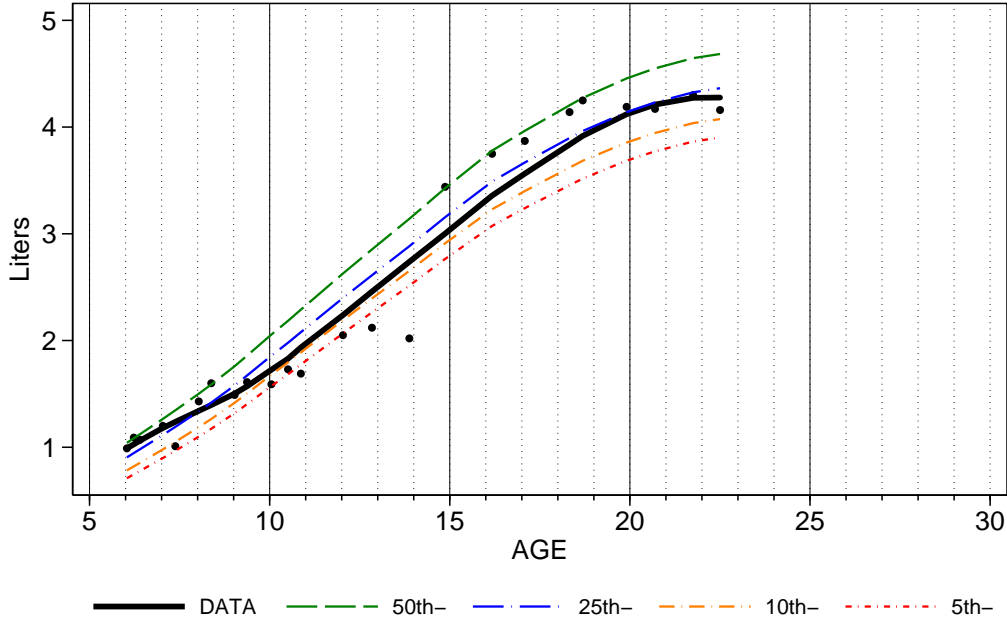

1393

**PATTERN OF GROWTH/DECLINE (Check One)**

- ( 1 ) Normal Growth
- ( 2 ) Normal Growth, Early Decline
- ( 3 ) Reduced Growth
- ( 4 ) Reduced Growth, Early Decline
- ( 9 ) Undetermined Pattern
- ( 8 ) Undetermined - not enough data

Maximum lung growth attained: ( 1 ) Yes ( 0 ) No

Plateau started: ( 2 ) No plateau ( 1 ) Yes ( 0 ) No

Decline started: ( 1 ) Yes ( 0 ) No

AGE AT each of the following periods (use '99' if N/A):

Maximum Lung Growth: \_\_\_\_ . \_\_\_\_

Start of Plateau: \_\_\_\_ . \_\_\_\_

Start of Decline: \_\_\_\_ . \_\_\_\_

### Pre-BD FEV1 Data and Percentiles: 1404

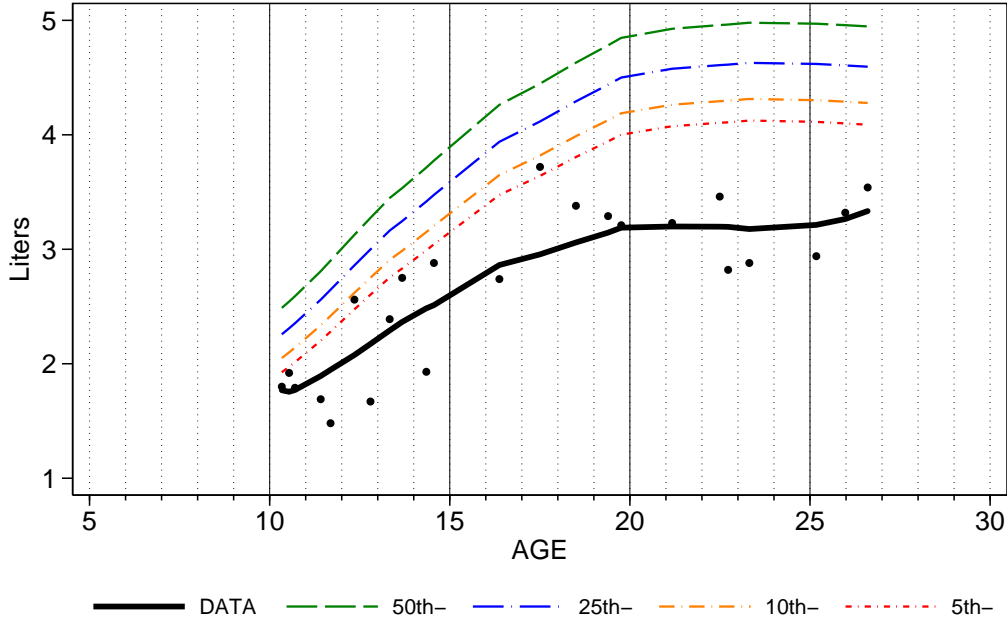

1404

**PATTERN OF GROWTH/DECLINE (Check One)**

- ( 1) Normal Growth
- ( 2) Normal Growth, Early Decline
- ( 3) Reduced Growth
- ( 4) Reduced Growth, Early Decline
- ( 9) Undetermined Pattern
- ( 8) Undetermined - not enough data

Maximum lung growth attained: ( 1) Yes ( 0) No

Plateau started: ( 2) No plateau ( 1) Yes ( 0) No

Decline started: ( 1) Yes ( 0) No

AGE AT each of the following periods (use '99' if N/A):

Maximum Lung Growth: \_\_\_\_ . \_\_\_\_

Start of Plateau: \_\_\_\_ . \_\_\_\_

Start of Decline: \_\_\_\_ . \_\_\_\_

### Pre-BD FEV1 Data and Percentiles: 1405

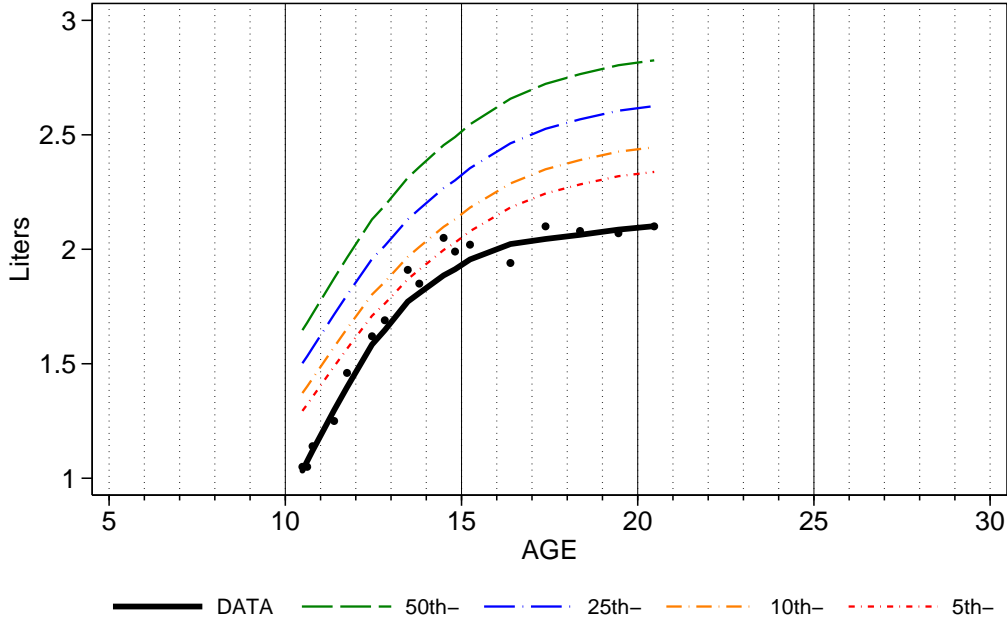

1405

**PATTERN OF GROWTH/DECLINE (Check One)**

- ( 1 ) Normal Growth
- ( 2 ) Normal Growth, Early Decline
- ( 3 ) Reduced Growth
- ( 4 ) Reduced Growth, Early Decline
- ( 9 ) Undetermined Pattern
- ( 8 ) Undetermined - not enough data

Maximum lung growth attained: ( 1 ) Yes ( 0 ) No

Plateau started: ( 2 ) No plateau ( 1 ) Yes ( 0 ) No

Decline started: ( 1 ) Yes ( 0 ) No

AGE AT each of the following periods (use '99' if N/A):

Maximum Lung Growth: \_\_\_\_ . \_\_\_\_

Start of Plateau: \_\_\_\_ . \_\_\_\_

Start of Decline: \_\_\_\_ . \_\_\_\_

### Pre-BD FEV1 Data and Percentiles: 1406

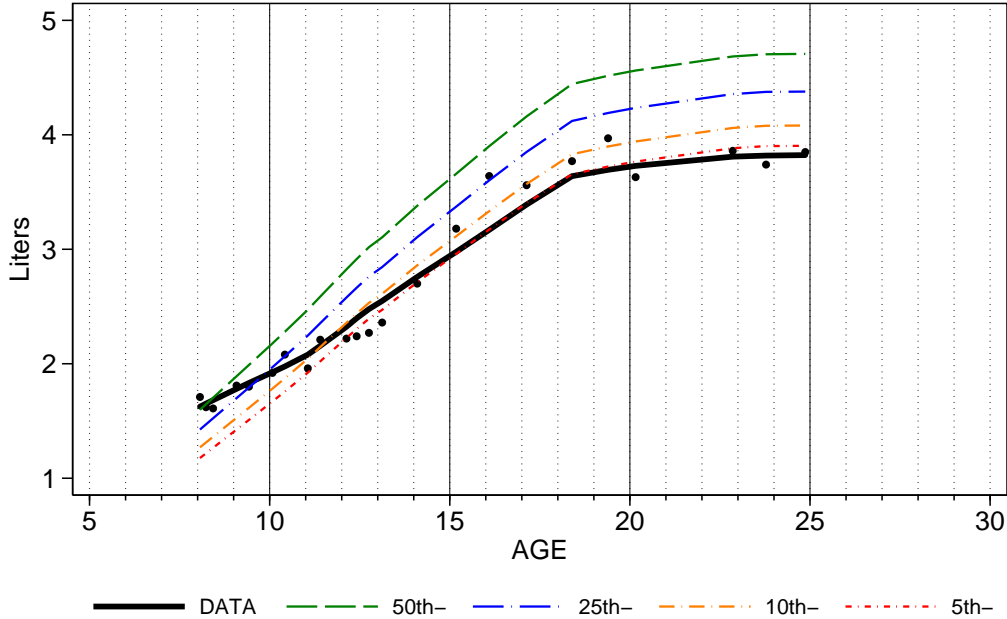

1406

**PATTERN OF GROWTH/DECLINE (Check One)**

- ( 1 ) Normal Growth
- ( 2 ) Normal Growth, Early Decline
- ( 3 ) Reduced Growth
- ( 4 ) Reduced Growth, Early Decline
- ( 9 ) Undetermined Pattern
- ( 8 ) Undetermined - not enough data

Maximum lung growth attained: ( 1 ) Yes ( 0 ) No

Plateau started: ( 2 ) No plateau ( 1 ) Yes ( 0 ) No

Decline started: ( 1 ) Yes ( 0 ) No

AGE AT each of the following periods (use '99' if N/A):

Maximum Lung Growth: \_\_\_\_ . \_\_\_\_

Start of Plateau: \_\_\_\_ . \_\_\_\_

Start of Decline: \_\_\_\_ . \_\_\_\_

### Pre-BD FEV1 Data and Percentiles: 1408

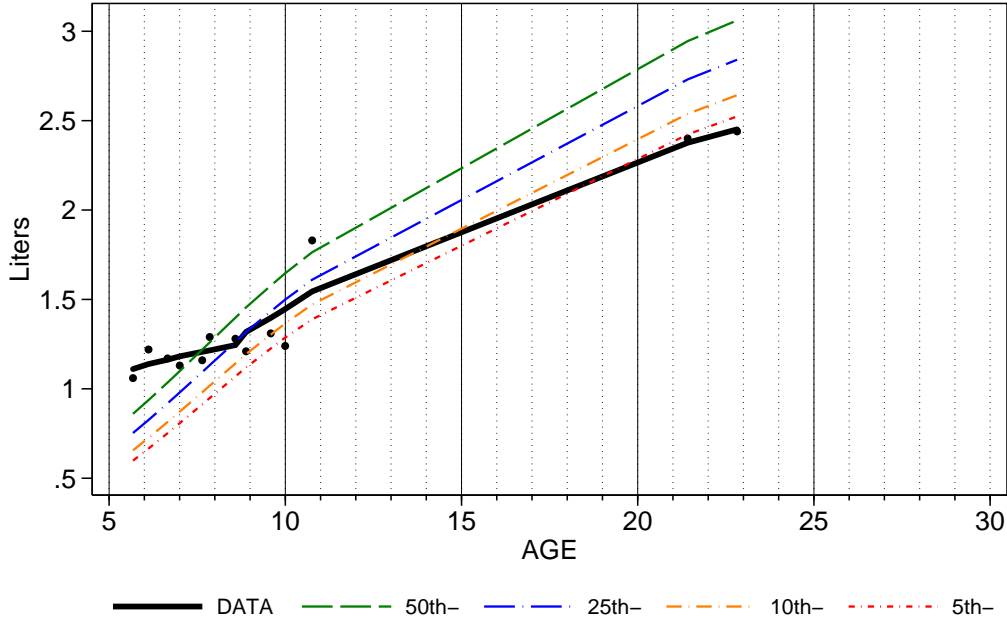

1408

**PATTERN OF GROWTH/DECLINE (Check One)**

- ( 1 ) Normal Growth
- ( 2 ) Normal Growth, Early Decline
- ( 3 ) Reduced Growth
- ( 4 ) Reduced Growth, Early Decline
- ( 9 ) Undetermined Pattern
- ( 8 ) Undetermined - not enough data

Maximum lung growth attained: ( 1 ) Yes ( 0 ) No

Plateau started: ( 2 ) No plateau ( 1 ) Yes ( 0 ) No

Decline started: ( 1 ) Yes ( 0 ) No

AGE AT each of the following periods (use '99' if N/A):

Maximum Lung Growth: \_\_\_\_ . \_\_\_\_

Start of Plateau: \_\_\_\_ . \_\_\_\_

Start of Decline: \_\_\_\_ . \_\_\_\_

### Pre-BD FEV1 Data and Percentiles: 1412

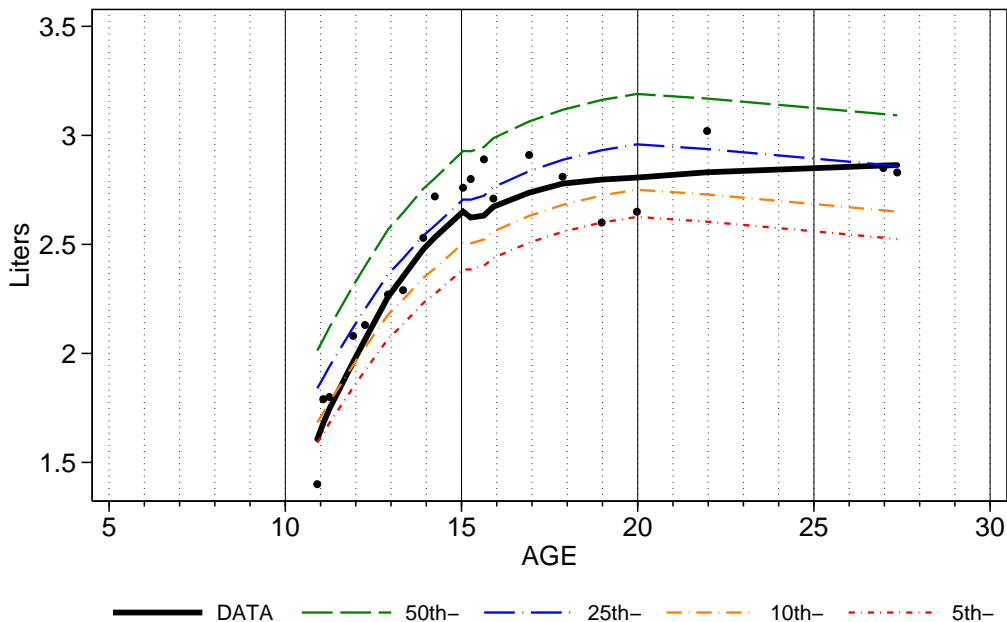

1412

**PATTERN OF GROWTH/DECLINE (Check One)**

- ( 1 ) Normal Growth
- ( 2 ) Normal Growth, Early Decline
- ( 3 ) Reduced Growth
- ( 4 ) Reduced Growth, Early Decline
- ( 9 ) Undetermined Pattern
- ( 8 ) Undetermined - not enough data

Maximum lung growth attained: ( 1 ) Yes ( 0 ) No

Plateau started: ( 2 ) No plateau ( 1 ) Yes ( 0 ) No

Decline started: ( 1 ) Yes ( 0 ) No

AGE AT each of the following periods (use '99' if N/A):

Maximum Lung Growth: \_\_\_\_ . \_\_\_\_

Start of Plateau: \_\_\_\_ . \_\_\_\_

Start of Decline: \_\_\_\_ . \_\_\_\_

### Pre-BD FEV1 Data and Percentiles: 1421

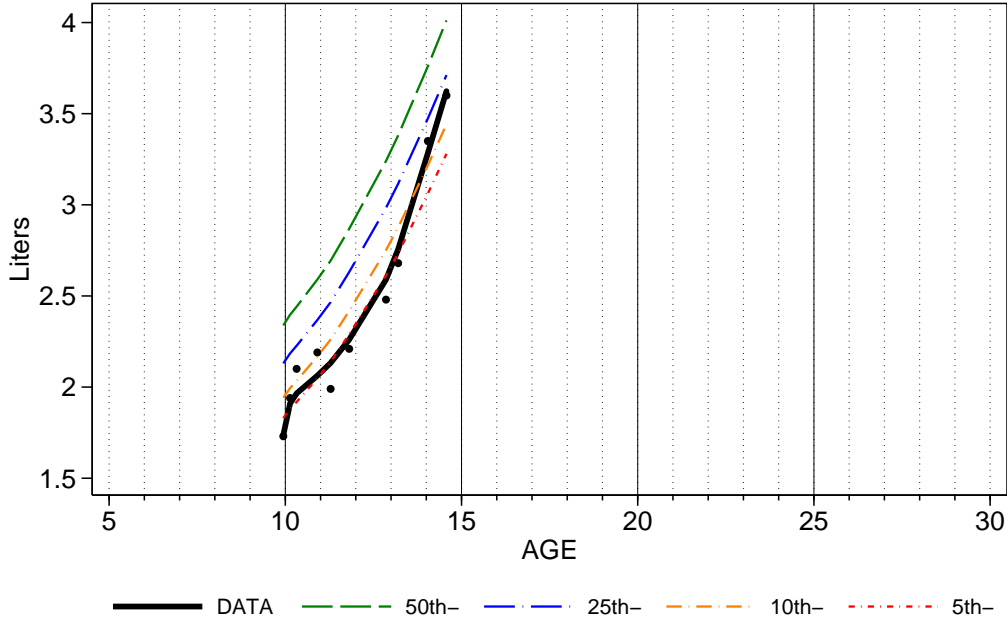

1421

**PATTERN OF GROWTH/DECLINE (Check One)**

- ( 1) Normal Growth
- ( 2) Normal Growth, Early Decline
- ( 3) Reduced Growth
- ( 4) Reduced Growth, Early Decline
- ( 9) Undetermined Pattern
- ( 8) Undetermined - not enough data

Maximum lung growth attained: ( 1) Yes ( 0) No

Plateau started: ( 2) No plateau ( 1) Yes ( 0) No

Decline started: ( 1) Yes ( 0) No

AGE AT each of the following periods (use '99' if N/A):

Maximum Lung Growth: \_\_\_\_ . \_\_\_\_

Start of Plateau: \_\_\_\_ . \_\_\_\_

Start of Decline: \_\_\_\_ . \_\_\_\_

### Pre-BD FEV1 Data and Percentiles: 1429

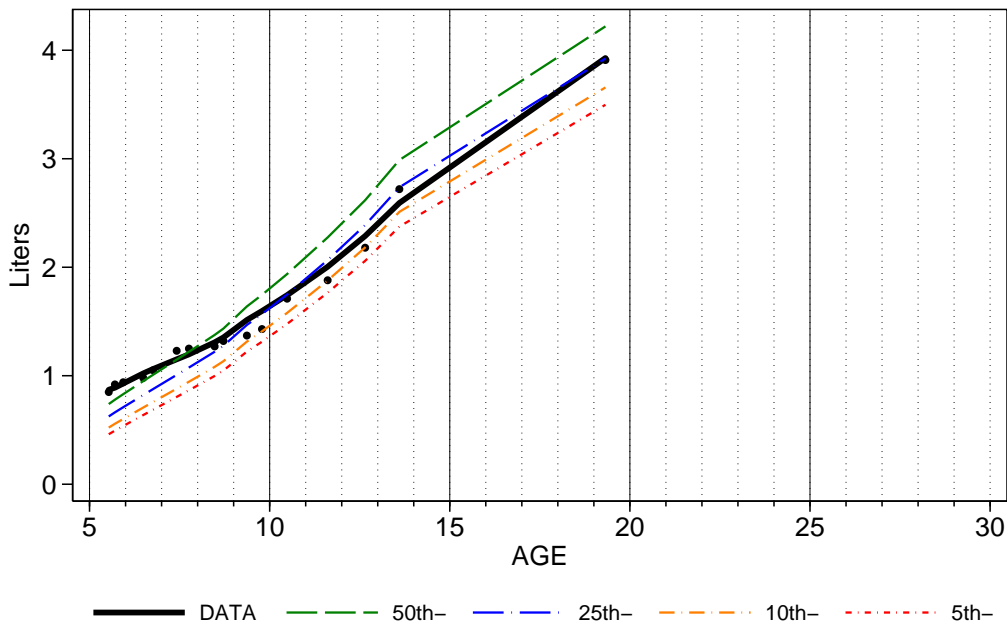

1429

**PATTERN OF GROWTH/DECLINE (Check One)**

- ( 1) Normal Growth
- ( 2) Normal Growth, Early Decline
- ( 3) Reduced Growth
- ( 4) Reduced Growth, Early Decline
- ( 9) Undetermined Pattern
- ( 8) Undetermined - not enough data

Maximum lung growth attained: ( 1) Yes ( 0) No

Plateau started: ( 2) No plateau ( 1) Yes ( 0) No

Decline started: ( 1) Yes ( 0) No

AGE AT each of the following periods (use '99' if N/A):

Maximum Lung Growth: \_\_\_\_ . \_\_\_\_

Start of Plateau: \_\_\_\_ . \_\_\_\_

Start of Decline: \_\_\_\_ . \_\_\_\_



### Pre-BD FEV1 Data and Percentiles: 1435

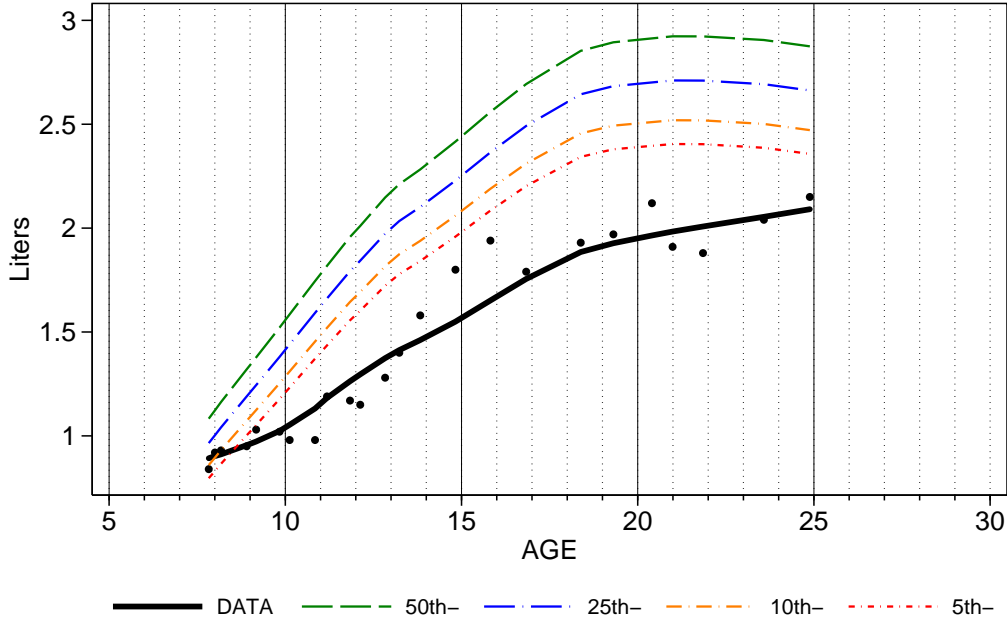

1435

**PATTERN OF GROWTH/DECLINE (Check One)**

- ( 1 ) Normal Growth
- ( 2 ) Normal Growth, Early Decline
- ( 3 ) Reduced Growth
- ( 4 ) Reduced Growth, Early Decline
- ( 9 ) Undetermined Pattern
- ( 8 ) Undetermined - not enough data

Maximum lung growth attained: ( 1 ) Yes ( 0 ) No

Plateau started: ( 2 ) No plateau ( 1 ) Yes ( 0 ) No

Decline started: ( 1 ) Yes ( 0 ) No

AGE AT each of the following periods (use '99' if N/A):

Maximum Lung Growth: \_\_\_\_ . \_\_\_\_

Start of Plateau: \_\_\_\_ . \_\_\_\_

Start of Decline: \_\_\_\_ . \_\_\_\_

### Pre-BD FEV1 Data and Percentiles: 1438

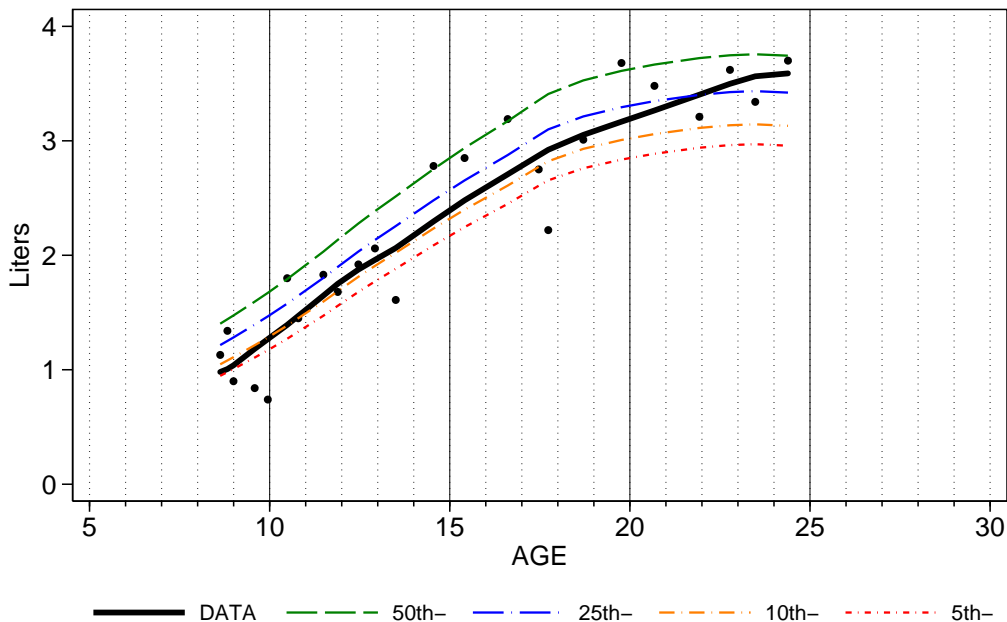

1438

**PATTERN OF GROWTH/DECLINE (Check One)**

- ( 1 ) Normal Growth
- ( 2 ) Normal Growth, Early Decline
- ( 3 ) Reduced Growth
- ( 4 ) Reduced Growth, Early Decline
- ( 9 ) Undetermined Pattern
- ( 8 ) Undetermined - not enough data

Maximum lung growth attained: ( 1 ) Yes ( 0 ) No

Plateau started: ( 2 ) No plateau ( 1 ) Yes ( 0 ) No

Decline started: ( 1 ) Yes ( 0 ) No

AGE AT each of the following periods (use '99' if N/A):

Maximum Lung Growth: \_\_\_\_ . \_\_\_\_

Start of Plateau: \_\_\_\_ . \_\_\_\_

Start of Decline: \_\_\_\_ . \_\_\_\_

### Pre-BD FEV1 Data and Percentiles: 1441

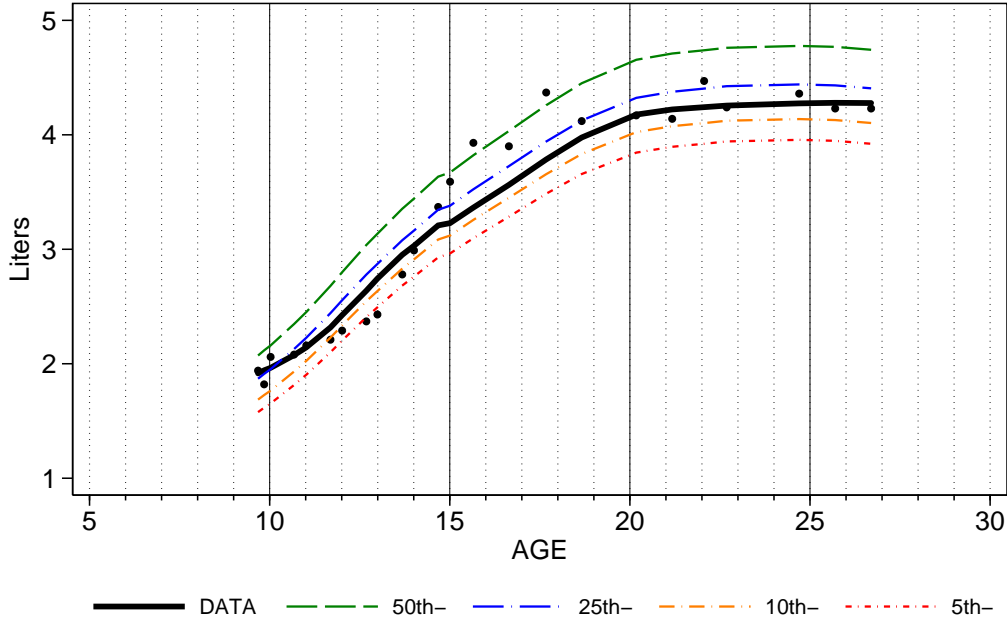

1441

**PATTERN OF GROWTH/DECLINE (Check One)**

- ( 1) Normal Growth
- ( 2) Normal Growth, Early Decline
- ( 3) Reduced Growth
- ( 4) Reduced Growth, Early Decline
- ( 9) Undetermined Pattern
- ( 8) Undetermined - not enough data

Maximum lung growth attained: ( 1) Yes ( 0) No

Plateau started: ( 2) No plateau ( 1) Yes ( 0) No

Decline started: ( 1) Yes ( 0) No

AGE AT each of the following periods (use '99' if N/A):

Maximum Lung Growth: \_\_\_\_ . \_\_\_\_

Start of Plateau: \_\_\_\_ . \_\_\_\_

Start of Decline: \_\_\_\_ . \_\_\_\_

### Pre-BD FEV1 Data and Percentiles: 1444

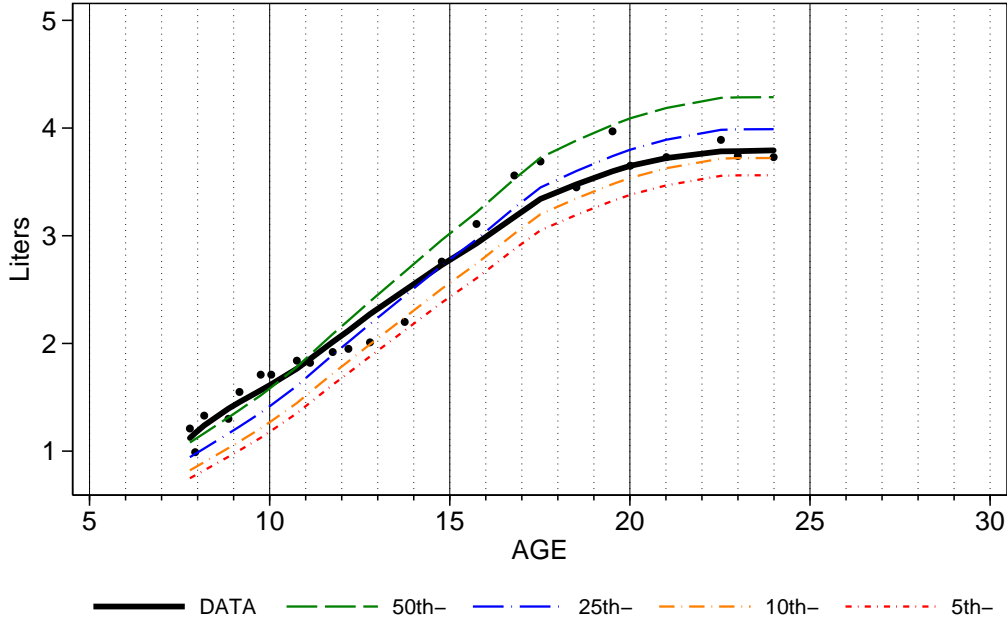

1444

**PATTERN OF GROWTH/DECLINE (Check One)**

- ( 1 ) Normal Growth
- ( 2 ) Normal Growth, Early Decline
- ( 3 ) Reduced Growth
- ( 4 ) Reduced Growth, Early Decline
- ( 9 ) Undetermined Pattern
- ( 8 ) Undetermined - not enough data

Maximum lung growth attained: ( 1 ) Yes ( 0 ) No

Plateau started: ( 2 ) No plateau ( 1 ) Yes ( 0 ) No

Decline started: ( 1 ) Yes ( 0 ) No

AGE AT each of the following periods (use '99' if N/A):

Maximum Lung Growth: \_\_\_\_ . \_\_\_\_

Start of Plateau: \_\_\_\_ . \_\_\_\_

Start of Decline: \_\_\_\_ . \_\_\_\_

### Pre-BD FEV1 Data and Percentiles: 1447

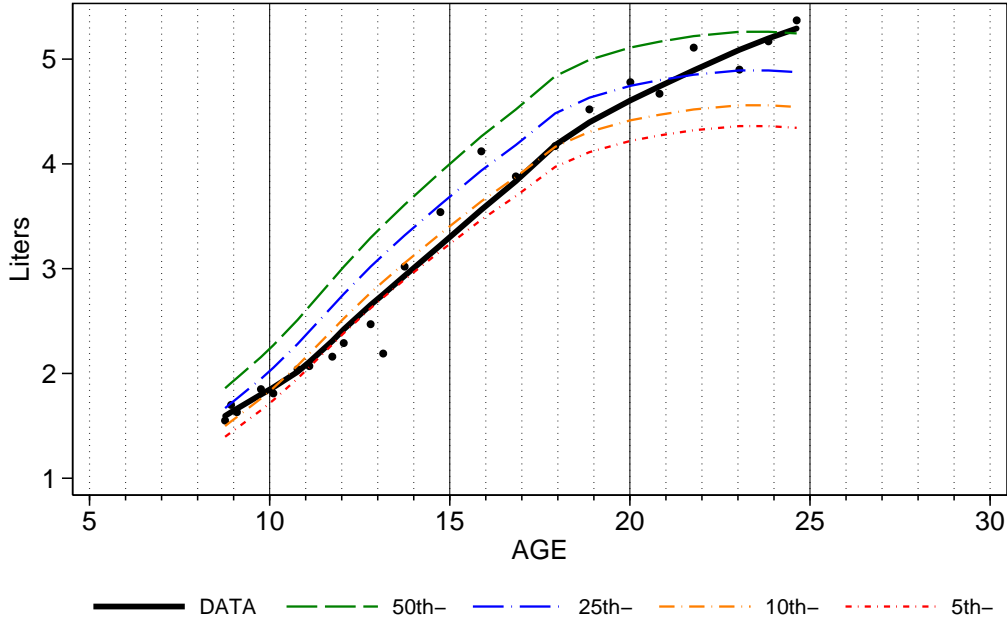

1447

**PATTERN OF GROWTH/DECLINE (Check One)**

- ( 1) Normal Growth
- ( 2) Normal Growth, Early Decline
- ( 3) Reduced Growth
- ( 4) Reduced Growth, Early Decline
- ( 9) Undetermined Pattern
- ( 8) Undetermined - not enough data

Maximum lung growth attained: ( 1) Yes ( 0) No

Plateau started: ( 2) No plateau ( 1) Yes ( 0) No

Decline started: ( 1) Yes ( 0) No

AGE AT each of the following periods (use '99' if N/A):

Maximum Lung Growth: \_\_\_\_ . \_\_\_\_

Start of Plateau: \_\_\_\_ . \_\_\_\_

Start of Decline: \_\_\_\_ . \_\_\_\_

### Pre-BD FEV1 Data and Percentiles: 1449

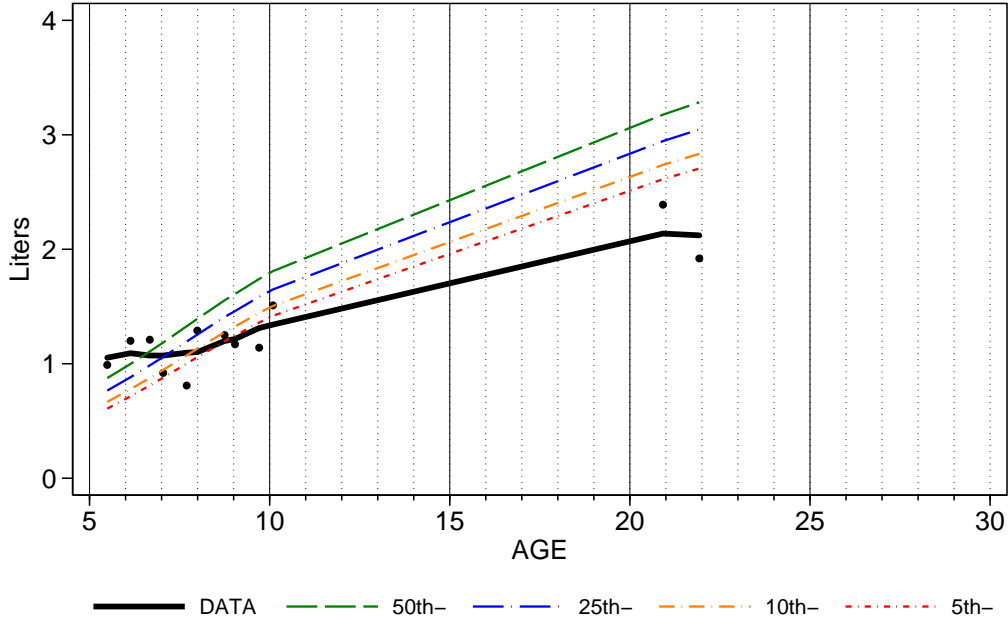

1449

**PATTERN OF GROWTH/DECLINE (Check One)**

- ( 1) Normal Growth
- ( 2) Normal Growth, Early Decline
- ( 3) Reduced Growth
- ( 4) Reduced Growth, Early Decline
- ( 9) Undetermined Pattern
- ( 8) Undetermined - not enough data

Maximum lung growth attained: ( 1) Yes ( 0) No

Plateau started: ( 2) No plateau ( 1) Yes ( 0) No

Decline started: ( 1) Yes ( 0) No

AGE AT each of the following periods (use '99' if N/A):

Maximum Lung Growth: \_\_\_\_ . \_\_\_\_

Start of Plateau: \_\_\_\_ . \_\_\_\_

Start of Decline: \_\_\_\_ . \_\_\_\_

### Pre-BD FEV1 Data and Percentiles: 1450

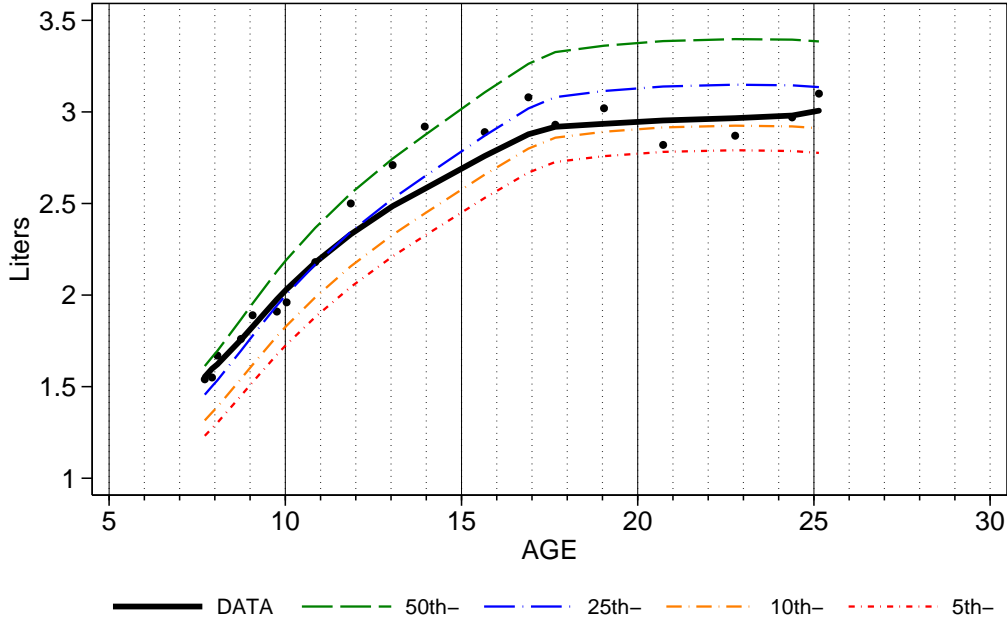

1450

**PATTERN OF GROWTH/DECLINE (Check One)**

- ( 1 ) Normal Growth
- ( 2 ) Normal Growth, Early Decline
- ( 3 ) Reduced Growth
- ( 4 ) Reduced Growth, Early Decline
- ( 9 ) Undetermined Pattern
- ( 8 ) Undetermined - not enough data

Maximum lung growth attained: ( 1 ) Yes ( 0 ) No

Plateau started: ( 2 ) No plateau ( 1 ) Yes ( 0 ) No

Decline started: ( 1 ) Yes ( 0 ) No

AGE AT each of the following periods (use '99' if N/A):

Maximum Lung Growth: \_\_\_\_ . \_\_\_\_

Start of Plateau: \_\_\_\_ . \_\_\_\_

Start of Decline: \_\_\_\_ . \_\_\_\_

### Pre-BD FEV1 Data and Percentiles: 1451

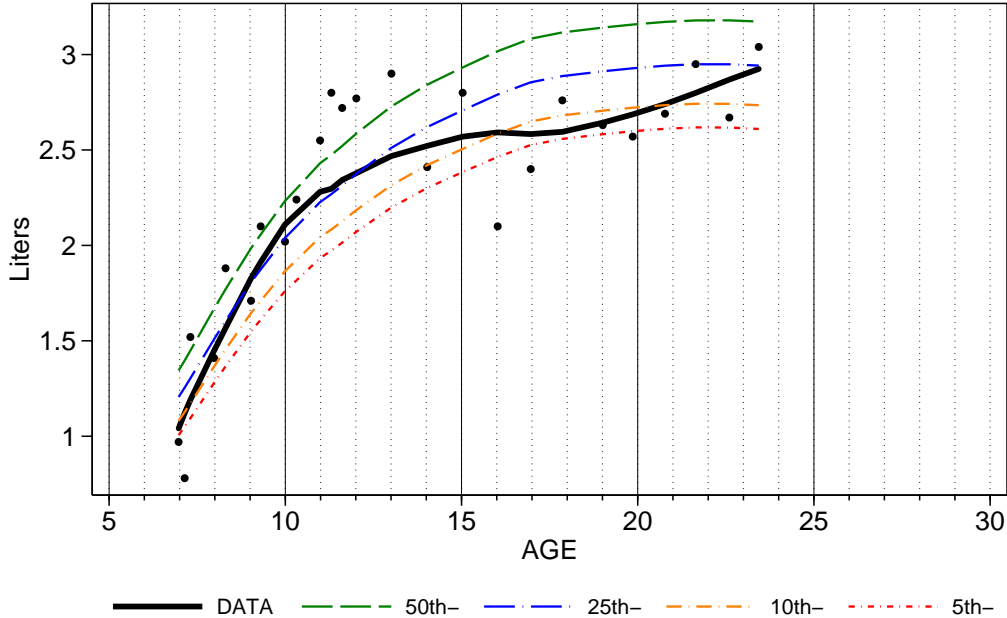

1451

**PATTERN OF GROWTH/DECLINE (Check One)**

- ( 1 ) Normal Growth
- ( 2 ) Normal Growth, Early Decline
- ( 3 ) Reduced Growth
- ( 4 ) Reduced Growth, Early Decline
- ( 9 ) Undetermined Pattern
- ( 8 ) Undetermined - not enough data

Maximum lung growth attained: ( 1 ) Yes ( 0 ) No

Plateau started: ( 2 ) No plateau ( 1 ) Yes ( 0 ) No

Decline started: ( 1 ) Yes ( 0 ) No

AGE AT each of the following periods (use '99' if N/A):

Maximum Lung Growth: \_\_\_\_ . \_\_\_\_

Start of Plateau: \_\_\_\_ . \_\_\_\_

Start of Decline: \_\_\_\_ . \_\_\_\_



### Pre-BD FEV1 Data and Percentiles: 1452

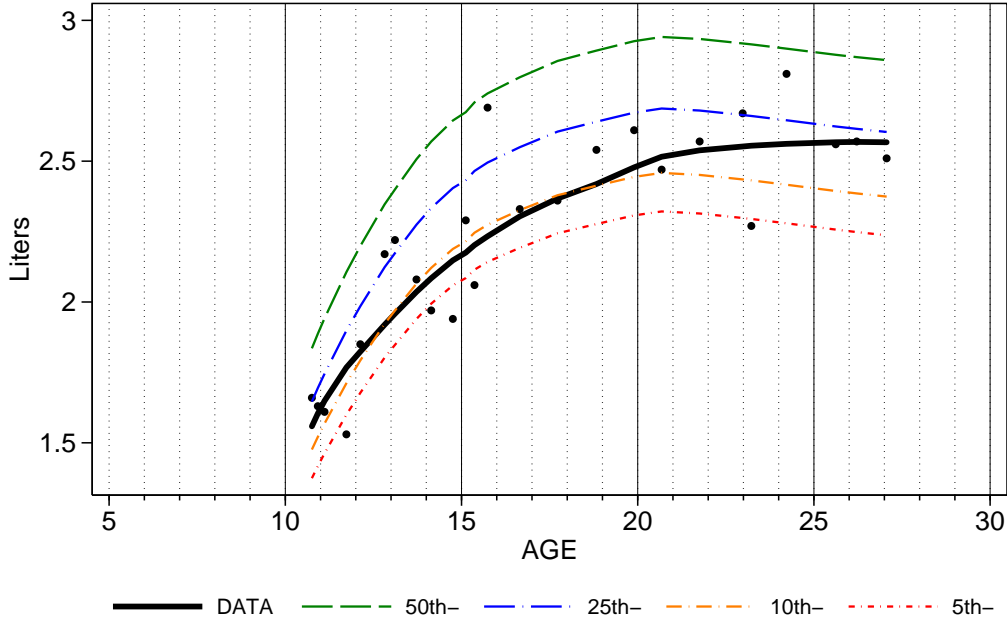

1452

**PATTERN OF GROWTH/DECLINE (Check One)**

- ( 1) Normal Growth
- ( 2) Normal Growth, Early Decline
- ( 3) Reduced Growth
- ( 4) Reduced Growth, Early Decline
- ( 9) Undetermined Pattern
- ( 8) Undetermined - not enough data

Maximum lung growth attained: ( 1) Yes ( 0) No

Plateau started: ( 2) No plateau ( 1) Yes ( 0) No

Decline started: ( 1) Yes ( 0) No

AGE AT each of the following periods (use '99' if N/A):

Maximum Lung Growth: \_\_\_\_ . \_\_\_\_

Start of Plateau: \_\_\_\_ . \_\_\_\_

Start of Decline: \_\_\_\_ . \_\_\_\_

### Pre-BD FEV1 Data and Percentiles: 1455

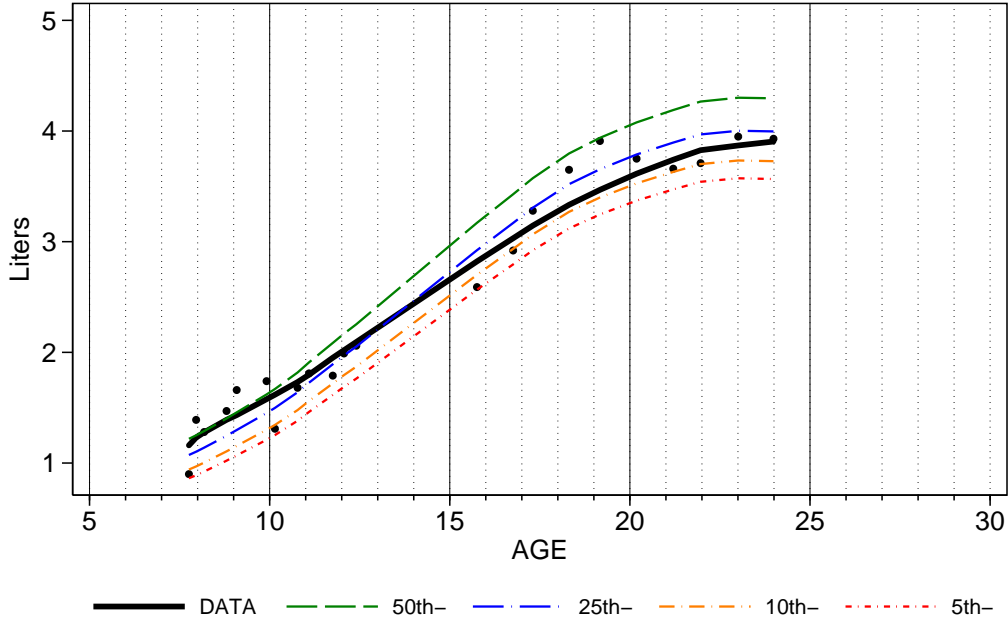

1455

**PATTERN OF GROWTH/DECLINE (Check One)**

- ( 1) Normal Growth
- ( 2) Normal Growth, Early Decline
- ( 3) Reduced Growth
- ( 4) Reduced Growth, Early Decline
- ( 9) Undetermined Pattern
- ( 8) Undetermined - not enough data

Maximum lung growth attained: ( 1) Yes ( 0) No

Plateau started: ( 2) No plateau ( 1) Yes ( 0) No

Decline started: ( 1) Yes ( 0) No

AGE AT each of the following periods (use '99' if N/A):

Maximum Lung Growth: \_\_\_\_ . \_\_\_\_

Start of Plateau: \_\_\_\_ . \_\_\_\_

Start of Decline: \_\_\_\_ . \_\_\_\_

### Pre-BD FEV1 Data and Percentiles: 1456

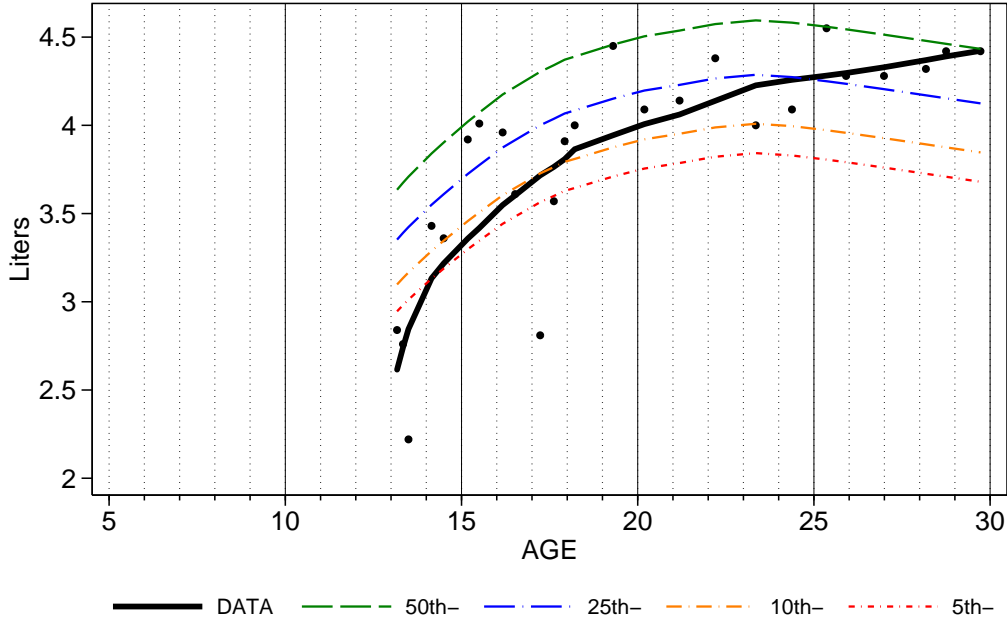

1456

**PATTERN OF GROWTH/DECLINE (Check One)**

- ( 1) Normal Growth
- ( 2) Normal Growth, Early Decline
- ( 3) Reduced Growth
- ( 4) Reduced Growth, Early Decline
- ( 9) Undetermined Pattern
- ( 8) Undetermined - not enough data

Maximum lung growth attained: ( 1) Yes ( 0) No

Plateau started: ( 2) No plateau ( 1) Yes ( 0) No

Decline started: ( 1) Yes ( 0) No

AGE AT each of the following periods (use '99' if N/A):

Maximum Lung Growth: \_\_\_\_ . \_\_\_\_

Start of Plateau: \_\_\_\_ . \_\_\_\_

Start of Decline: \_\_\_\_ . \_\_\_\_

### Pre-BD FEV1 Data and Percentiles: 1461

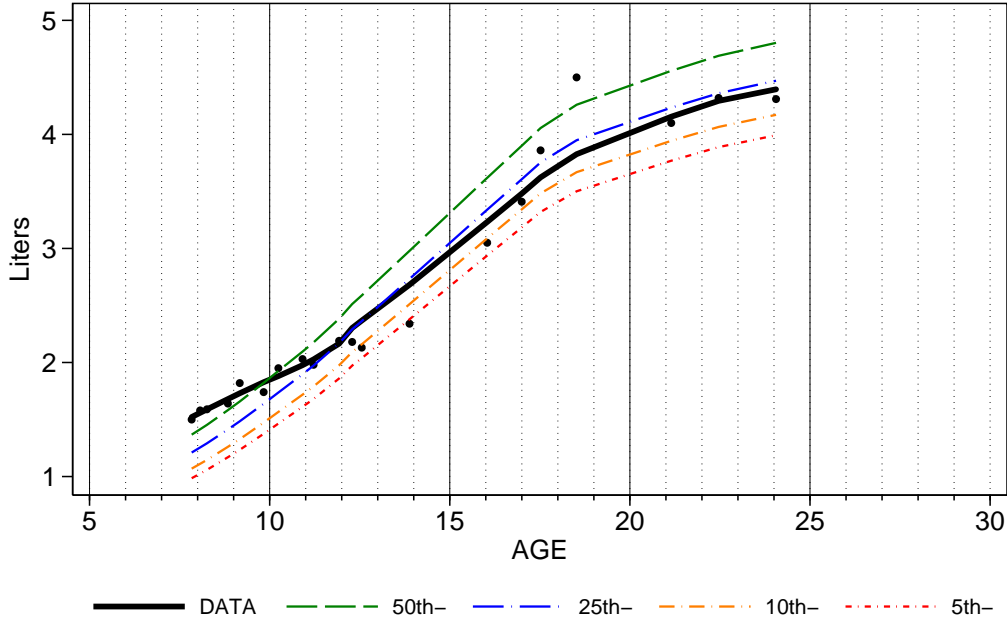

1461

**PATTERN OF GROWTH/DECLINE (Check One)**

- ( 1 ) Normal Growth
- ( 2 ) Normal Growth, Early Decline
- ( 3 ) Reduced Growth
- ( 4 ) Reduced Growth, Early Decline
- ( 9 ) Undetermined Pattern
- ( 8 ) Undetermined - not enough data

Maximum lung growth attained: ( 1 ) Yes ( 0 ) No

Plateau started: ( 2 ) No plateau ( 1 ) Yes ( 0 ) No

Decline started: ( 1 ) Yes ( 0 ) No

AGE AT each of the following periods (use '99' if N/A):

Maximum Lung Growth: \_\_\_\_ . \_\_\_\_

Start of Plateau: \_\_\_\_ . \_\_\_\_

Start of Decline: \_\_\_\_ . \_\_\_\_

### Pre-BD FEV1 Data and Percentiles: 1469

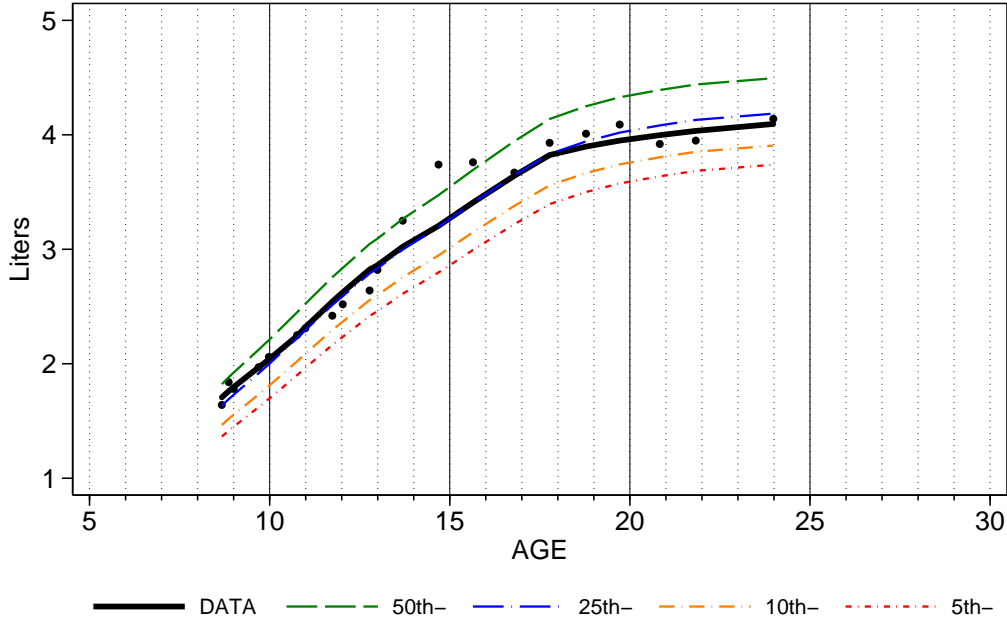

1469

**PATTERN OF GROWTH/DECLINE (Check One)**

- ( 1 ) Normal Growth
- ( 2 ) Normal Growth, Early Decline
- ( 3 ) Reduced Growth
- ( 4 ) Reduced Growth, Early Decline
- ( 9 ) Undetermined Pattern
- ( 8 ) Undetermined - not enough data

Maximum lung growth attained: ( 1 ) Yes ( 0 ) No

Plateau started: ( 2 ) No plateau ( 1 ) Yes ( 0 ) No

Decline started: ( 1 ) Yes ( 0 ) No

AGE AT each of the following periods (use '99' if N/A):

Maximum Lung Growth: \_\_\_\_ . \_\_\_\_

Start of Plateau: \_\_\_\_ . \_\_\_\_

Start of Decline: \_\_\_\_ . \_\_\_\_

### Pre-BD FEV1 Data and Percentiles: 1473

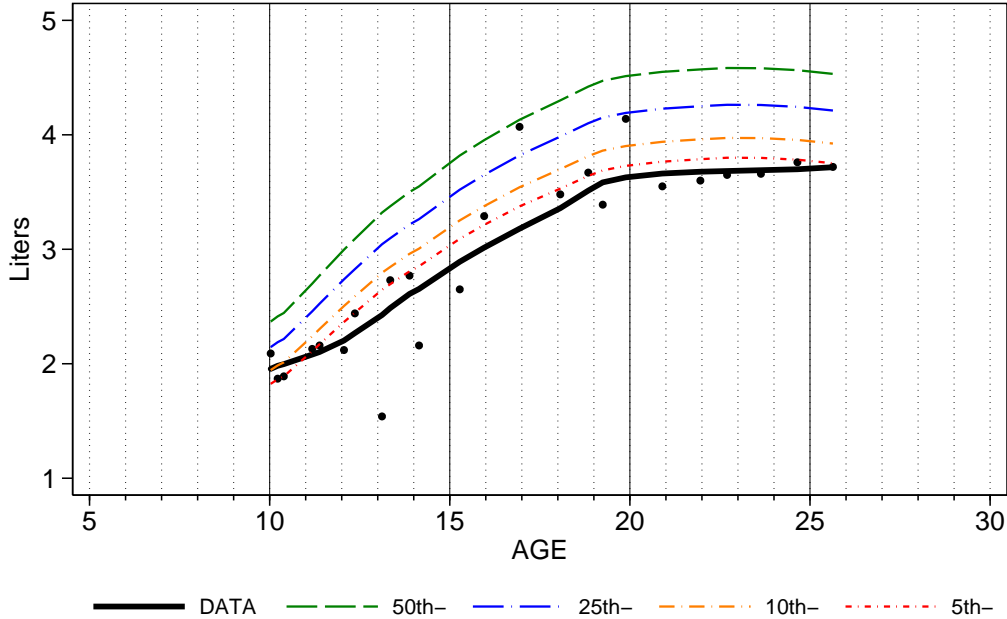

1473

**PATTERN OF GROWTH/DECLINE (Check One)**

- ( 1) Normal Growth
- ( 2) Normal Growth, Early Decline
- ( 3) Reduced Growth
- ( 4) Reduced Growth, Early Decline
- ( 9) Undetermined Pattern
- ( 8) Undetermined - not enough data

Maximum lung growth attained: ( 1) Yes ( 0) No

Plateau started: ( 2) No plateau ( 1) Yes ( 0) No

Decline started: ( 1) Yes ( 0) No

AGE AT each of the following periods (use '99' if N/A):

Maximum Lung Growth: \_\_\_\_ . \_\_\_\_

Start of Plateau: \_\_\_\_ . \_\_\_\_

Start of Decline: \_\_\_\_ . \_\_\_\_

### Pre-BD FEV1 Data and Percentiles: 1476

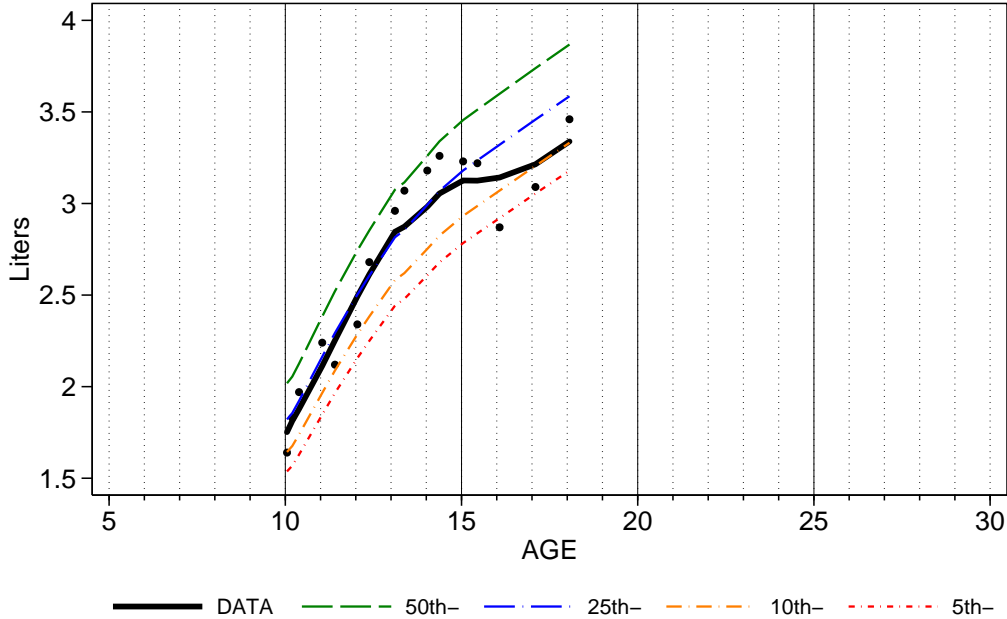

1476

**PATTERN OF GROWTH/DECLINE (Check One)**

- ( 1) Normal Growth
- ( 2) Normal Growth, Early Decline
- ( 3) Reduced Growth
- ( 4) Reduced Growth, Early Decline
- ( 9) Undetermined Pattern
- ( 8) Undetermined - not enough data

Maximum lung growth attained: ( 1) Yes ( 0) No

Plateau started: ( 2) No plateau ( 1) Yes ( 0) No

Decline started: ( 1) Yes ( 0) No

AGE AT each of the following periods (use '99' if N/A):

Maximum Lung Growth: \_\_\_\_ . \_\_\_\_

Start of Plateau: \_\_\_\_ . \_\_\_\_

Start of Decline: \_\_\_\_ . \_\_\_\_

### Pre-BD FEV1 Data and Percentiles: 1478

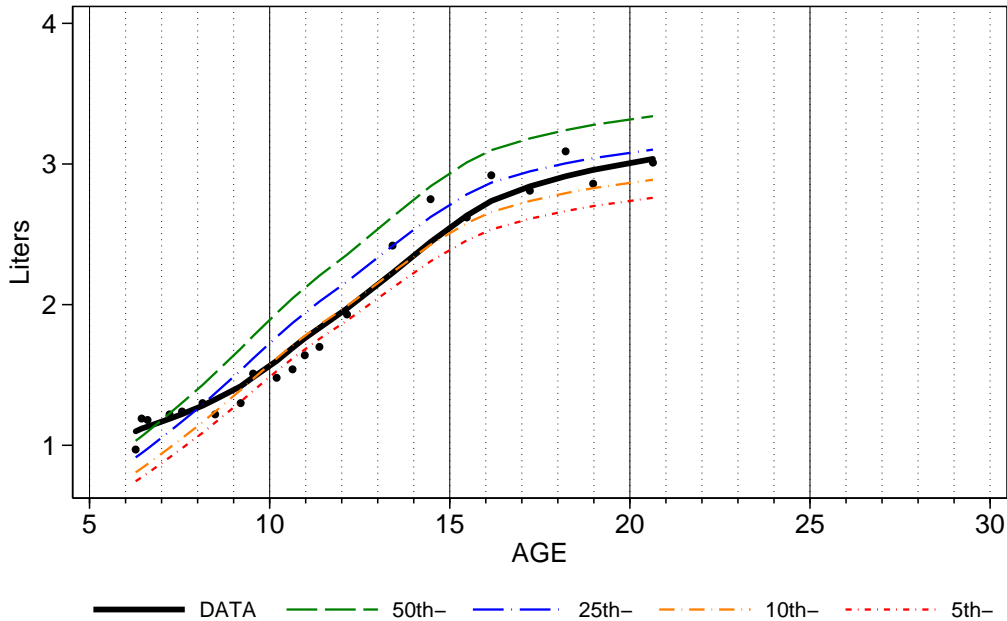

1478

**PATTERN OF GROWTH/DECLINE (Check One)**

- ( 1 ) Normal Growth
- ( 2 ) Normal Growth, Early Decline
- ( 3 ) Reduced Growth
- ( 4 ) Reduced Growth, Early Decline
- ( 9 ) Undetermined Pattern
- ( 8 ) Undetermined - not enough data

Maximum lung growth attained: ( 1 ) Yes ( 0 ) No

Plateau started: ( 2 ) No plateau ( 1 ) Yes ( 0 ) No

Decline started: ( 1 ) Yes ( 0 ) No

AGE AT each of the following periods (use '99' if N/A):

Maximum Lung Growth: \_\_\_\_ . \_\_\_\_

Start of Plateau: \_\_\_\_ . \_\_\_\_

Start of Decline: \_\_\_\_ . \_\_\_\_



### Pre-BD FEV1 Data and Percentiles: 1479

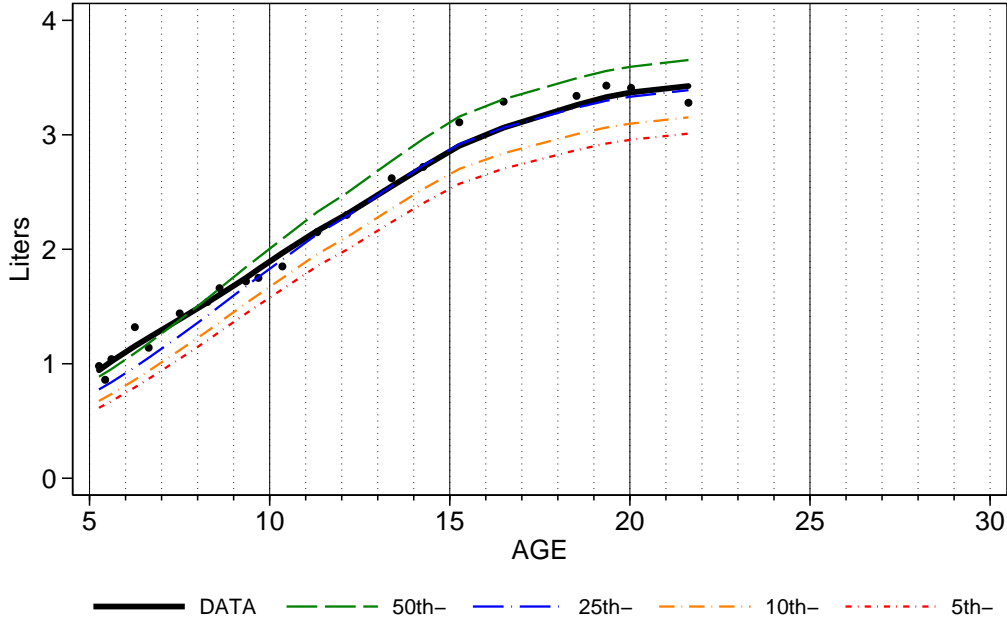

1479

**PATTERN OF GROWTH/DECLINE (Check One)**

- ( 1 ) Normal Growth
- ( 2 ) Normal Growth, Early Decline
- ( 3 ) Reduced Growth
- ( 4 ) Reduced Growth, Early Decline
- ( 9 ) Undetermined Pattern
- ( 8 ) Undetermined - not enough data

Maximum lung growth attained: ( 1 ) Yes ( 0 ) No

Plateau started: ( 2 ) No plateau ( 1 ) Yes ( 0 ) No

Decline started: ( 1 ) Yes ( 0 ) No

AGE AT each of the following periods (use '99' if N/A):

Maximum Lung Growth: \_\_\_\_ . \_\_\_\_

Start of Plateau: \_\_\_\_ . \_\_\_\_

Start of Decline: \_\_\_\_ . \_\_\_\_

### Pre-BD FEV1 Data and Percentiles: 1485

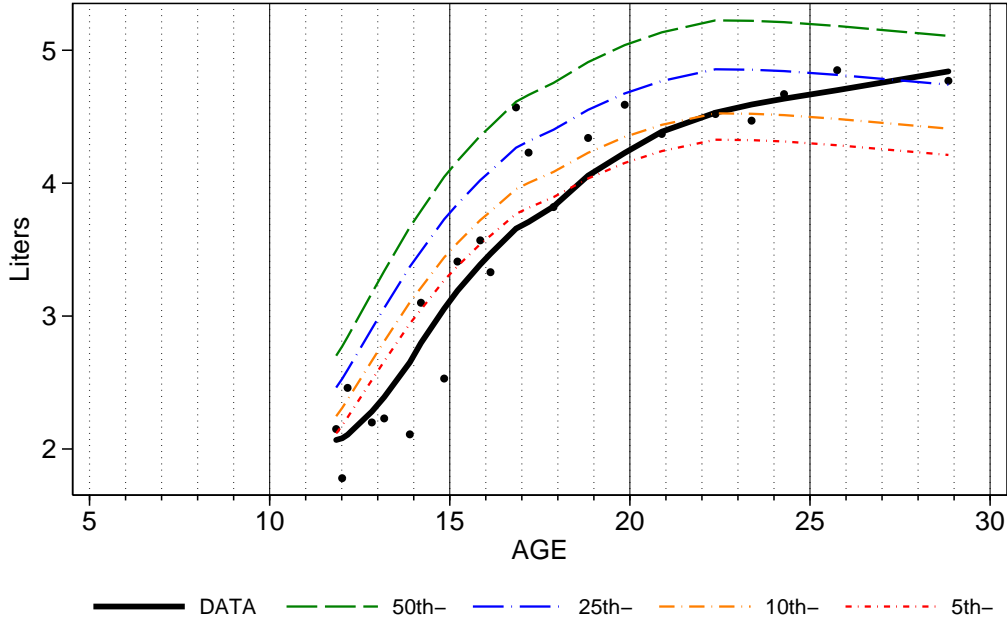

1485

**PATTERN OF GROWTH/DECLINE (Check One)**

- ( 1) Normal Growth
- ( 2) Normal Growth, Early Decline
- ( 3) Reduced Growth
- ( 4) Reduced Growth, Early Decline
- ( 9) Undetermined Pattern
- ( 8) Undetermined - not enough data

Maximum lung growth attained: ( 1) Yes ( 0) No

Plateau started: ( 2) No plateau ( 1) Yes ( 0) No

Decline started: ( 1) Yes ( 0) No

AGE AT each of the following periods (use '99' if N/A):

Maximum Lung Growth: \_\_\_\_ . \_\_\_\_

Start of Plateau: \_\_\_\_ . \_\_\_\_

Start of Decline: \_\_\_\_ . \_\_\_\_

### Pre-BD FEV1 Data and Percentiles: 1500

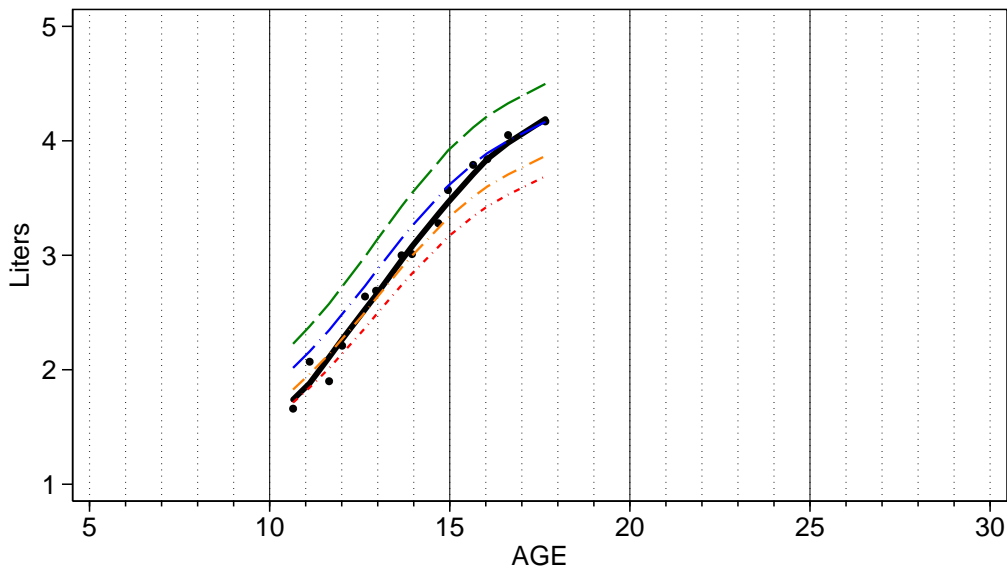

DATA   
  50th-   
  25th-   
  10th-   
  5th-

1500

**PATTERN OF GROWTH/DECLINE (Check One)**

- ( 1 ) Normal Growth
- ( 2 ) Normal Growth, Early Decline
- ( 3 ) Reduced Growth
- ( 4 ) Reduced Growth, Early Decline
- ( 9 ) Undetermined Pattern
- ( 8 ) Undetermined - not enough data

Maximum lung growth attained: ( 1 ) Yes ( 0 ) No

Plateau started: ( 2 ) No plateau ( 1 ) Yes ( 0 ) No

Decline started: ( 1 ) Yes ( 0 ) No

AGE AT each of the following periods (use '99' if N/A):

Maximum Lung Growth: \_\_\_\_ . \_\_\_\_

Start of Plateau: \_\_\_\_ . \_\_\_\_

Start of Decline: \_\_\_\_ . \_\_\_\_

### Pre-BD FEV1 Data and Percentiles: 1501

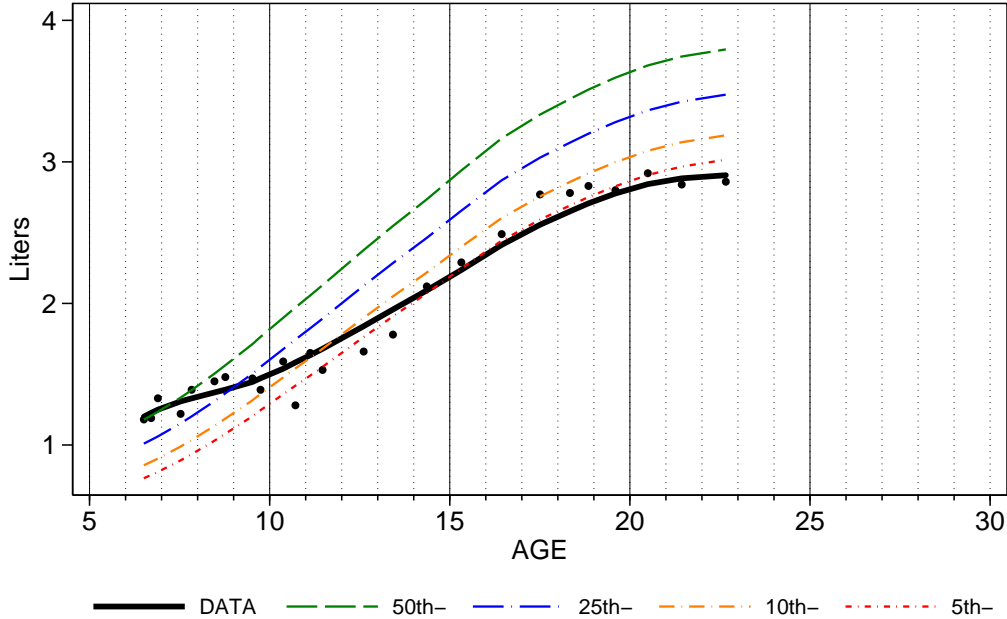

1501

**PATTERN OF GROWTH/DECLINE (Check One)**

- ( 1 ) Normal Growth
- ( 2 ) Normal Growth, Early Decline
- ( 3 ) Reduced Growth
- ( 4 ) Reduced Growth, Early Decline
- ( 9 ) Undetermined Pattern
- ( 8 ) Undetermined - not enough data

Maximum lung growth attained: ( 1 ) Yes ( 0 ) No

Plateau started: ( 2 ) No plateau ( 1 ) Yes ( 0 ) No

Decline started: ( 1 ) Yes ( 0 ) No

AGE AT each of the following periods (use '99' if N/A):

Maximum Lung Growth: \_\_\_\_ . \_\_\_\_

Start of Plateau: \_\_\_\_ . \_\_\_\_

Start of Decline: \_\_\_\_ . \_\_\_\_

### Pre-BD FEV1 Data and Percentiles: 1502

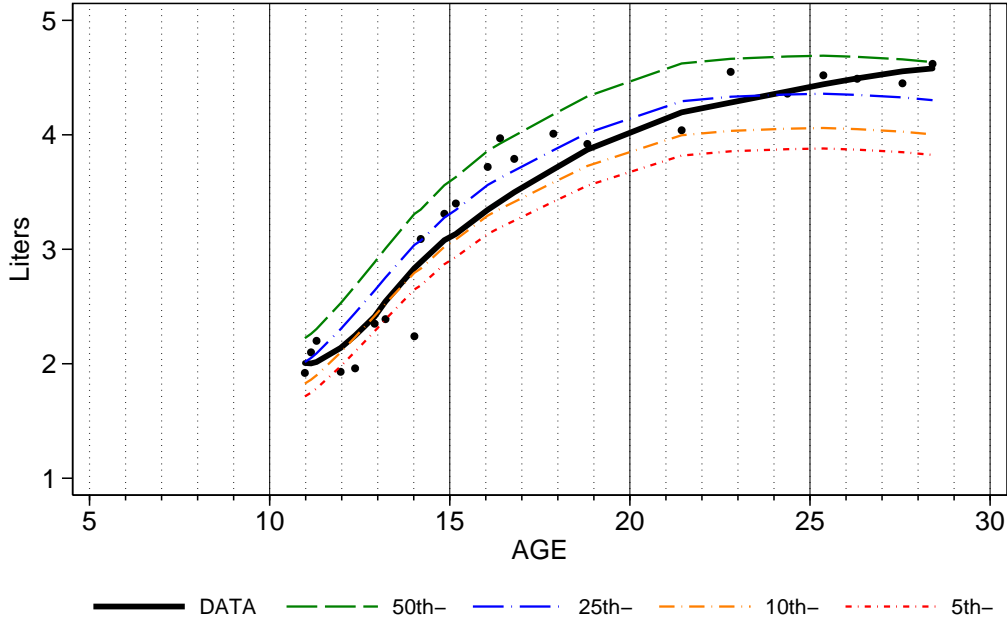

1502

**PATTERN OF GROWTH/DECLINE (Check One)**

- ( 1) Normal Growth
- ( 2) Normal Growth, Early Decline
- ( 3) Reduced Growth
- ( 4) Reduced Growth, Early Decline
- ( 9) Undetermined Pattern
- ( 8) Undetermined - not enough data

Maximum lung growth attained: ( 1) Yes ( 0) No

Plateau started: ( 2) No plateau ( 1) Yes ( 0) No

Decline started: ( 1) Yes ( 0) No

AGE AT each of the following periods (use '99' if N/A):

Maximum Lung Growth: \_\_\_\_ . \_\_\_\_

Start of Plateau: \_\_\_\_ . \_\_\_\_

Start of Decline: \_\_\_\_ . \_\_\_\_

### Pre-BD FEV1 Data and Percentiles: 1503

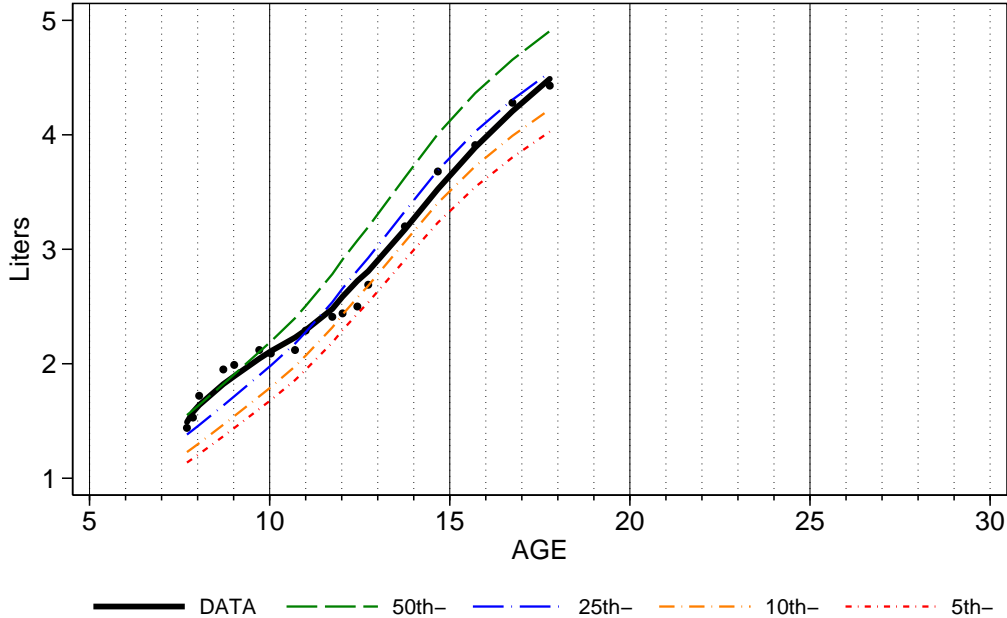

1503

**PATTERN OF GROWTH/DECLINE (Check One)**

- ( 1) Normal Growth
- ( 2) Normal Growth, Early Decline
- ( 3) Reduced Growth
- ( 4) Reduced Growth, Early Decline
- ( 9) Undetermined Pattern
- ( 8) Undetermined - not enough data

Maximum lung growth attained: ( 1) Yes ( 0) No

Plateau started: ( 2) No plateau ( 1) Yes ( 0) No

Decline started: ( 1) Yes ( 0) No

AGE AT each of the following periods (use '99' if N/A):

Maximum Lung Growth: \_\_\_\_ . \_\_\_\_

Start of Plateau: \_\_\_\_ . \_\_\_\_

Start of Decline: \_\_\_\_ . \_\_\_\_

### Pre-BD FEV1 Data and Percentiles: 1505

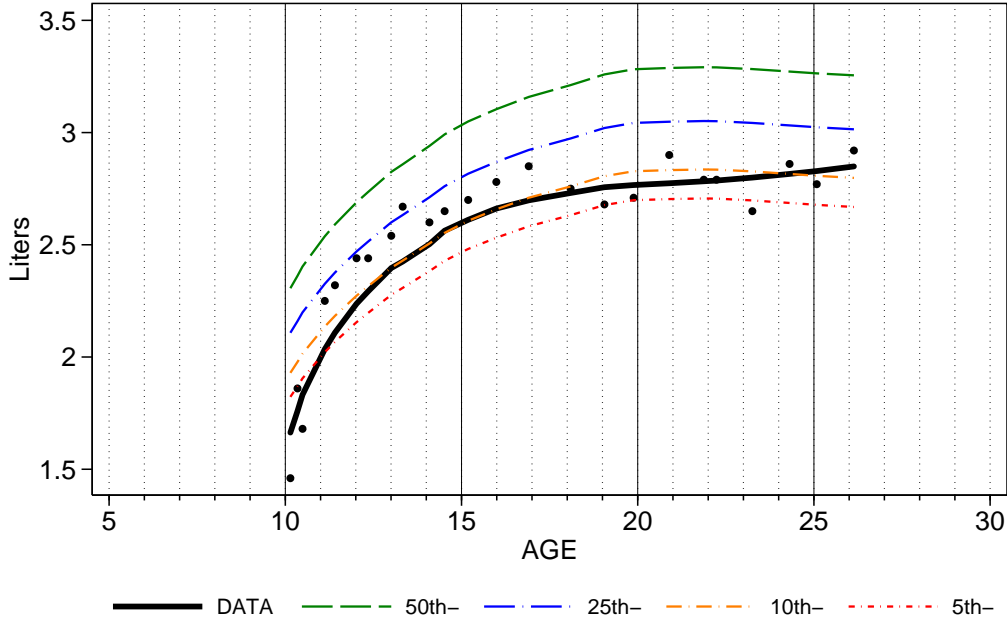

1505

**PATTERN OF GROWTH/DECLINE (Check One)**

- ( 1) Normal Growth
- ( 2) Normal Growth, Early Decline
- ( 3) Reduced Growth
- ( 4) Reduced Growth, Early Decline
- ( 9) Undetermined Pattern
- ( 8) Undetermined - not enough data

Maximum lung growth attained: ( 1) Yes ( 0) No

Plateau started: ( 2) No plateau ( 1) Yes ( 0) No

Decline started: ( 1) Yes ( 0) No

AGE AT each of the following periods (use '99' if N/A):

Maximum Lung Growth: \_\_\_\_ . \_\_\_\_

Start of Plateau: \_\_\_\_ . \_\_\_\_

Start of Decline: \_\_\_\_ . \_\_\_\_

### Pre-BD FEV1 Data and Percentiles: 1512

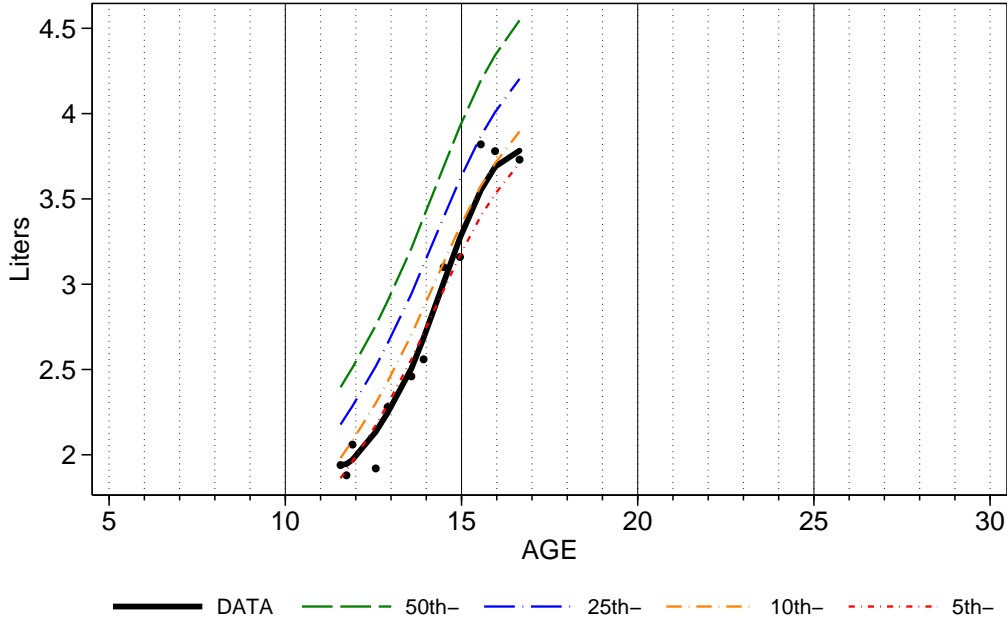

1512

**PATTERN OF GROWTH/DECLINE (Check One)**

- ( 1) Normal Growth
- ( 2) Normal Growth, Early Decline
- ( 3) Reduced Growth
- ( 4) Reduced Growth, Early Decline
- ( 9) Undetermined Pattern
- ( 8) Undetermined - not enough data

Maximum lung growth attained: ( 1) Yes ( 0) No

Plateau started: ( 2) No plateau ( 1) Yes ( 0) No

Decline started: ( 1) Yes ( 0) No

AGE AT each of the following periods (use '99' if N/A):

Maximum Lung Growth: \_\_\_\_ . \_\_\_\_

Start of Plateau: \_\_\_\_ . \_\_\_\_

Start of Decline: \_\_\_\_ . \_\_\_\_



### Pre-BD FEV1 Data and Percentiles: 1514

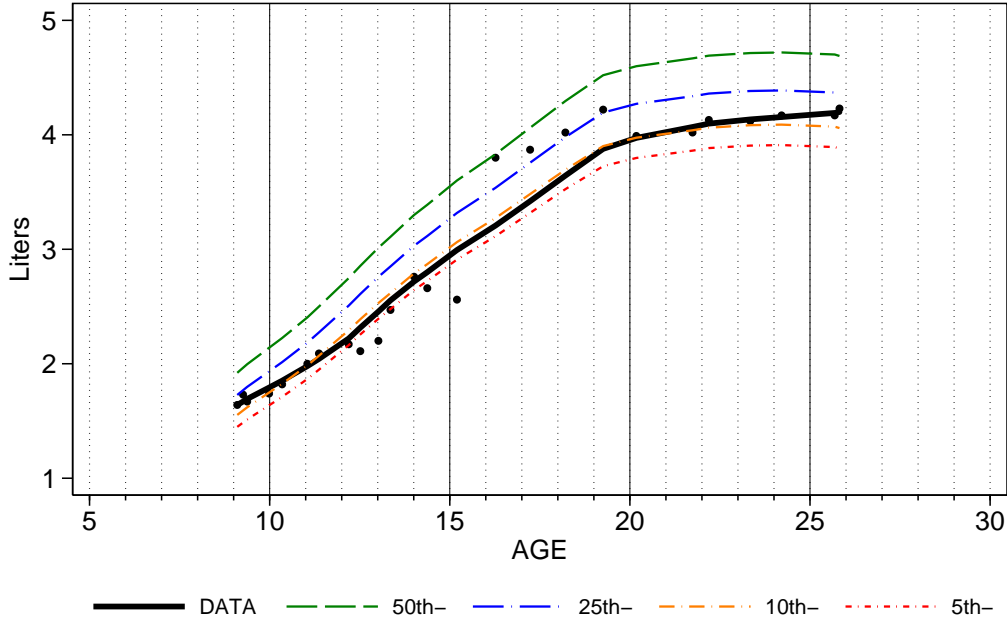

1514

**PATTERN OF GROWTH/DECLINE (Check One)**

- ( 1) Normal Growth
- ( 2) Normal Growth, Early Decline
- ( 3) Reduced Growth
- ( 4) Reduced Growth, Early Decline
- ( 9) Undetermined Pattern
- ( 8) Undetermined - not enough data

Maximum lung growth attained: ( 1) Yes ( 0) No

Plateau started: ( 2) No plateau ( 1) Yes ( 0) No

Decline started: ( 1) Yes ( 0) No

AGE AT each of the following periods (use '99' if N/A):

Maximum Lung Growth: \_\_\_\_ . \_\_\_\_

Start of Plateau: \_\_\_\_ . \_\_\_\_

Start of Decline: \_\_\_\_ . \_\_\_\_

### Pre-BD FEV1 Data and Percentiles: 1529

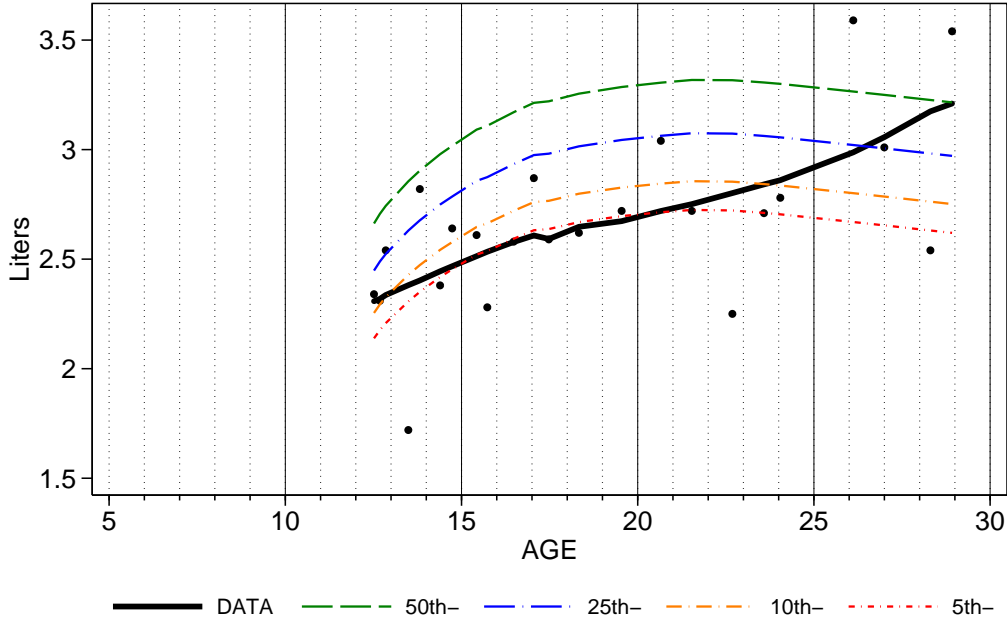

1529

**PATTERN OF GROWTH/DECLINE (Check One)**

- ( 1) Normal Growth
- ( 2) Normal Growth, Early Decline
- ( 3) Reduced Growth
- ( 4) Reduced Growth, Early Decline
- ( 9) Undetermined Pattern
- ( 8) Undetermined - not enough data

Maximum lung growth attained: ( 1) Yes ( 0) No

Plateau started: ( 2) No plateau ( 1) Yes ( 0) No

Decline started: ( 1) Yes ( 0) No

AGE AT each of the following periods (use '99' if N/A):

Maximum Lung Growth: \_\_\_\_ . \_\_\_\_

Start of Plateau: \_\_\_\_ . \_\_\_\_

Start of Decline: \_\_\_\_ . \_\_\_\_

### Pre-BD FEV1 Data and Percentiles: 1531

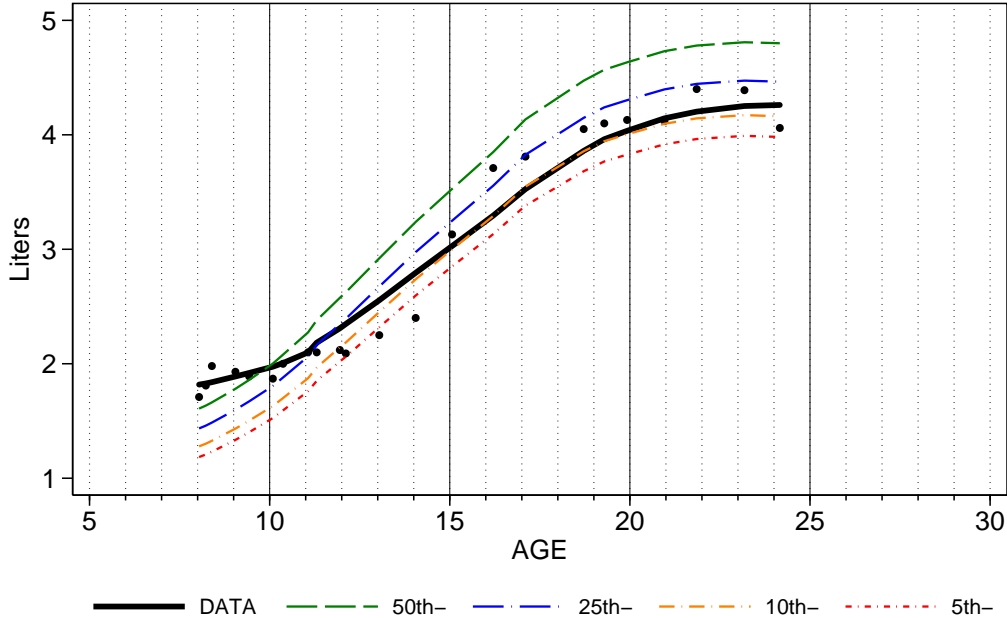

1531

**PATTERN OF GROWTH/DECLINE (Check One)**

- ( 1) Normal Growth
- ( 2) Normal Growth, Early Decline
- ( 3) Reduced Growth
- ( 4) Reduced Growth, Early Decline
- ( 9) Undetermined Pattern
- ( 8) Undetermined - not enough data

Maximum lung growth attained: ( 1) Yes ( 0) No

Plateau started: ( 2) No plateau ( 1) Yes ( 0) No

Decline started: ( 1) Yes ( 0) No

AGE AT each of the following periods (use '99' if N/A):

Maximum Lung Growth: \_\_\_\_ . \_\_\_\_

Start of Plateau: \_\_\_\_ . \_\_\_\_

Start of Decline: \_\_\_\_ . \_\_\_\_

### Pre-BD FEV1 Data and Percentiles: 1534

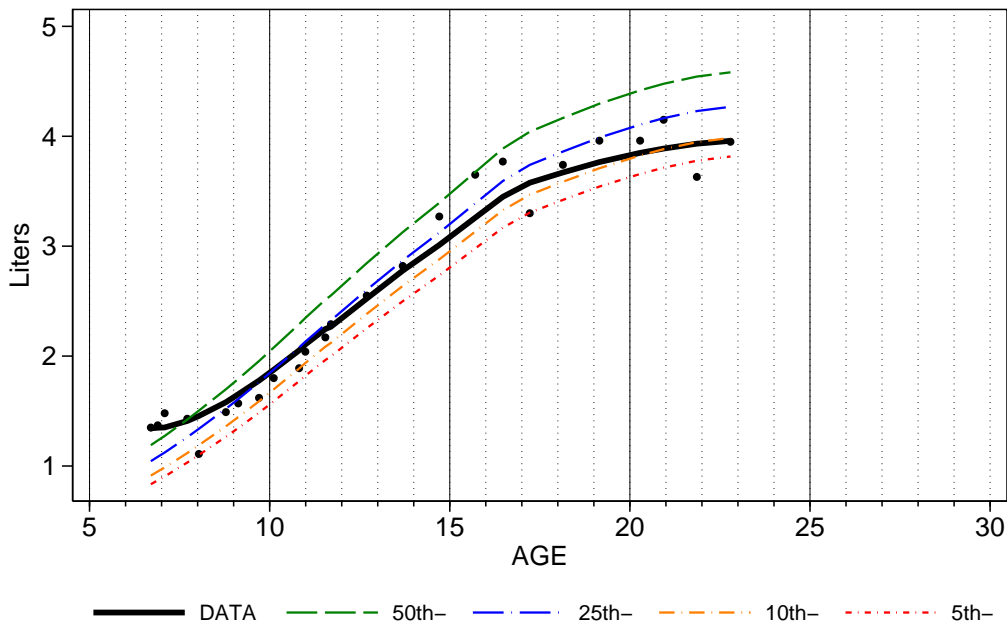

1534

**PATTERN OF GROWTH/DECLINE (Check One)**

- ( 1 ) Normal Growth
- ( 2 ) Normal Growth, Early Decline
- ( 3 ) Reduced Growth
- ( 4 ) Reduced Growth, Early Decline
- ( 9 ) Undetermined Pattern
- ( 8 ) Undetermined - not enough data

Maximum lung growth attained: ( 1 ) Yes ( 0 ) No

Plateau started: ( 2 ) No plateau ( 1 ) Yes ( 0 ) No

Decline started: ( 1 ) Yes ( 0 ) No

AGE AT each of the following periods (use '99' if N/A):

Maximum Lung Growth: \_\_\_\_ . \_\_\_\_

Start of Plateau: \_\_\_\_ . \_\_\_\_

Start of Decline: \_\_\_\_ . \_\_\_\_

### Pre-BD FEV1 Data and Percentiles: 1541

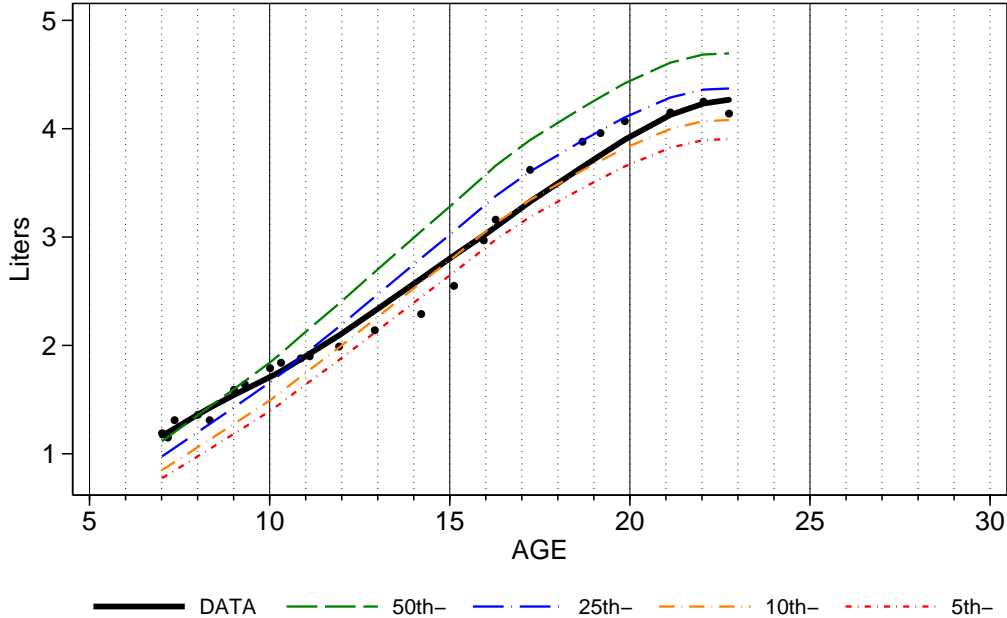

1541

**PATTERN OF GROWTH/DECLINE (Check One)**

- ( 1 ) Normal Growth
- ( 2 ) Normal Growth, Early Decline
- ( 3 ) Reduced Growth
- ( 4 ) Reduced Growth, Early Decline
- ( 9 ) Undetermined Pattern
- ( 8 ) Undetermined - not enough data

Maximum lung growth attained: ( 1 ) Yes ( 0 ) No

Plateau started: ( 2 ) No plateau ( 1 ) Yes ( 0 ) No

Decline started: ( 1 ) Yes ( 0 ) No

AGE AT each of the following periods (use '99' if N/A):

Maximum Lung Growth: \_\_\_\_ . \_\_\_\_

Start of Plateau: \_\_\_\_ . \_\_\_\_

Start of Decline: \_\_\_\_ . \_\_\_\_

### Pre-BD FEV1 Data and Percentiles: 1542

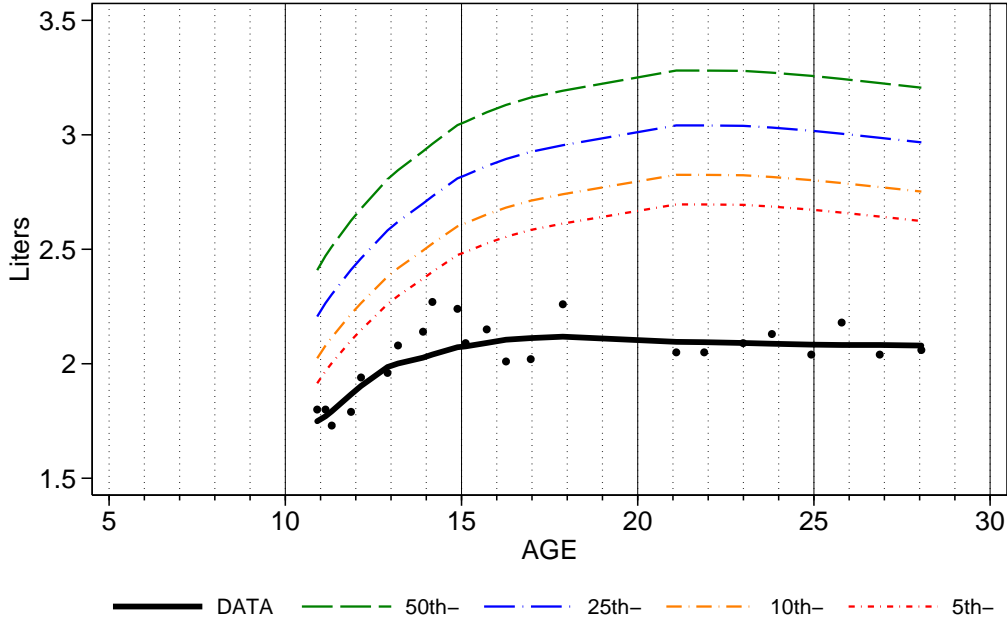

1542

**PATTERN OF GROWTH/DECLINE (Check One)**

- ( 1) Normal Growth
- ( 2) Normal Growth, Early Decline
- ( 3) Reduced Growth
- ( 4) Reduced Growth, Early Decline
- ( 9) Undetermined Pattern
- ( 8) Undetermined - not enough data

Maximum lung growth attained: ( 1) Yes ( 0) No

Plateau started: ( 2) No plateau ( 1) Yes ( 0) No

Decline started: ( 1) Yes ( 0) No

AGE AT each of the following periods (use '99' if N/A):

Maximum Lung Growth: \_\_\_\_ . \_\_\_\_

Start of Plateau: \_\_\_\_ . \_\_\_\_

Start of Decline: \_\_\_\_ . \_\_\_\_

### Pre-BD FEV1 Data and Percentiles: 1543

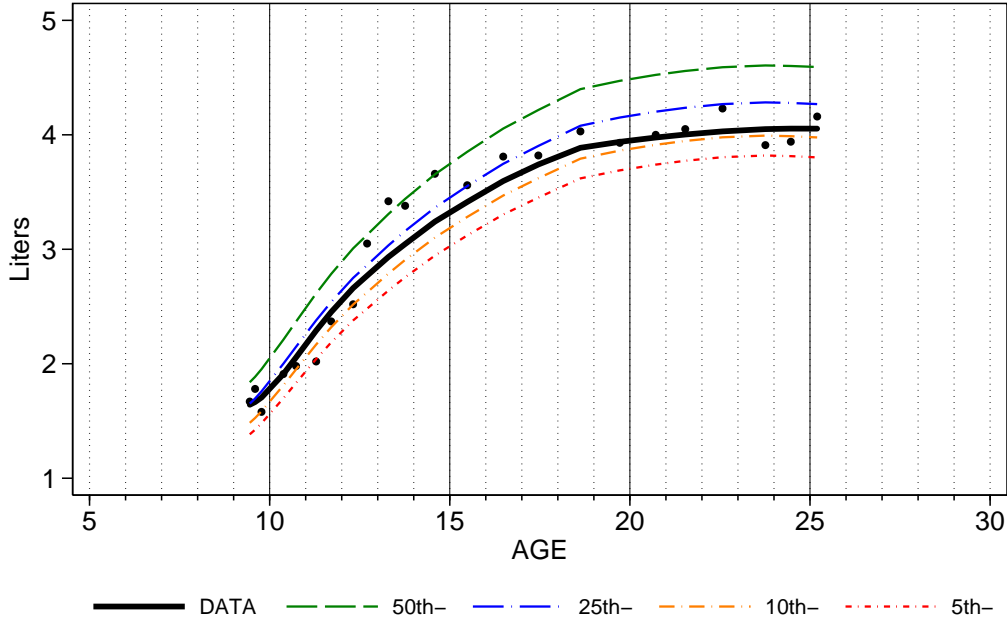

1543

**PATTERN OF GROWTH/DECLINE (Check One)**

- ( 1 ) Normal Growth
- ( 2 ) Normal Growth, Early Decline
- ( 3 ) Reduced Growth
- ( 4 ) Reduced Growth, Early Decline
- ( 9 ) Undetermined Pattern
- ( 8 ) Undetermined - not enough data

Maximum lung growth attained: ( 1 ) Yes ( 0 ) No

Plateau started: ( 2 ) No plateau ( 1 ) Yes ( 0 ) No

Decline started: ( 1 ) Yes ( 0 ) No

AGE AT each of the following periods (use '99' if N/A):

Maximum Lung Growth: \_\_\_\_ . \_\_\_\_

Start of Plateau: \_\_\_\_ . \_\_\_\_

Start of Decline: \_\_\_\_ . \_\_\_\_

### Pre-BD FEV1 Data and Percentiles: 1544

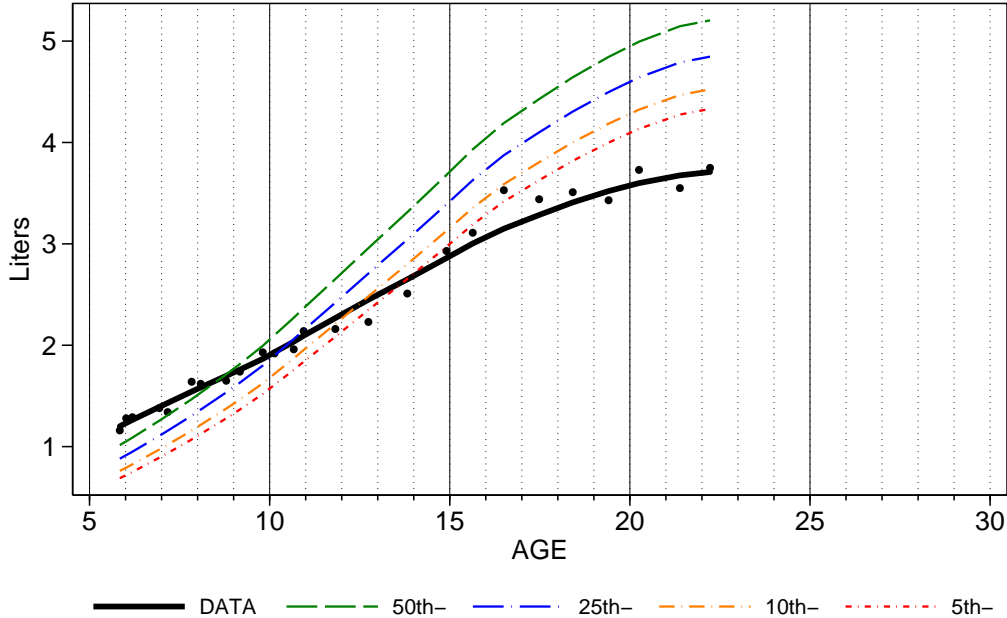

1544

**PATTERN OF GROWTH/DECLINE (Check One)**

- ( 1) Normal Growth
- ( 2) Normal Growth, Early Decline
- ( 3) Reduced Growth
- ( 4) Reduced Growth, Early Decline
- ( 9) Undetermined Pattern
- ( 8) Undetermined - not enough data

Maximum lung growth attained: ( 1) Yes ( 0) No

Plateau started: ( 2) No plateau ( 1) Yes ( 0) No

Decline started: ( 1) Yes ( 0) No

AGE AT each of the following periods (use '99' if N/A):

Maximum Lung Growth: \_\_\_\_ . \_\_\_\_

Start of Plateau: \_\_\_\_ . \_\_\_\_

Start of Decline: \_\_\_\_ . \_\_\_\_



### Pre-BD FEV1 Data and Percentiles: 1555

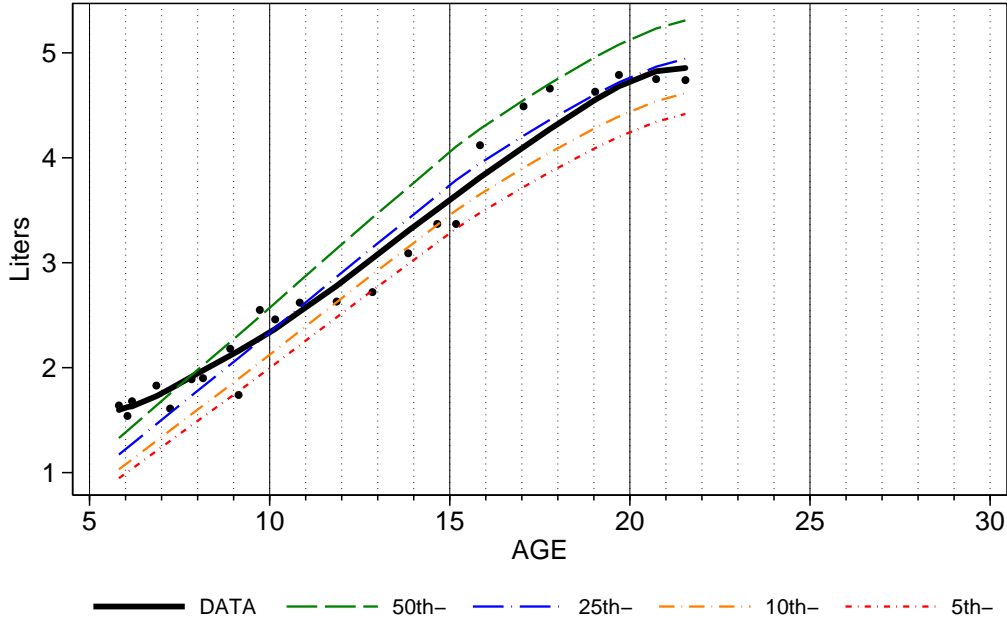

1555

**PATTERN OF GROWTH/DECLINE (Check One)**

- ( 1) Normal Growth
- ( 2) Normal Growth, Early Decline
- ( 3) Reduced Growth
- ( 4) Reduced Growth, Early Decline
- ( 9) Undetermined Pattern
- ( 8) Undetermined - not enough data

Maximum lung growth attained: ( 1) Yes ( 0) No

Plateau started: ( 2) No plateau ( 1) Yes ( 0) No

Decline started: ( 1) Yes ( 0) No

AGE AT each of the following periods (use '99' if N/A):

Maximum Lung Growth: \_\_\_\_ . \_\_\_\_

Start of Plateau: \_\_\_\_ . \_\_\_\_

Start of Decline: \_\_\_\_ . \_\_\_\_

### Pre-BD FEV1 Data and Percentiles: 1557

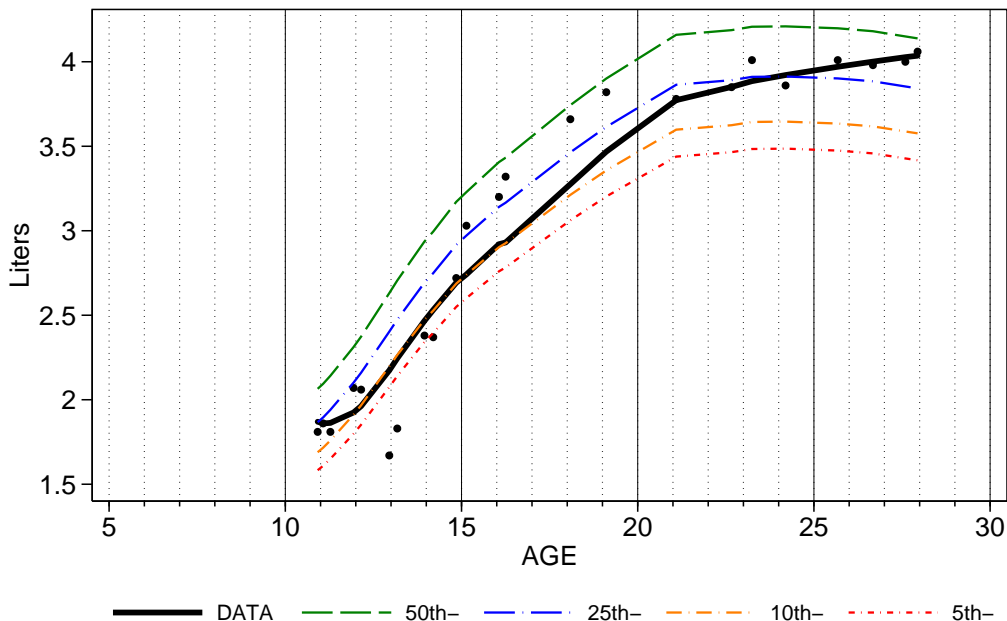

1557

**PATTERN OF GROWTH/DECLINE (Check One)**

- ( 1) Normal Growth
- ( 2) Normal Growth, Early Decline
- ( 3) Reduced Growth
- ( 4) Reduced Growth, Early Decline
- ( 9) Undetermined Pattern
- ( 8) Undetermined - not enough data

Maximum lung growth attained: ( 1) Yes ( 0) No

Plateau started: ( 2) No plateau ( 1) Yes ( 0) No

Decline started: ( 1) Yes ( 0) No

AGE AT each of the following periods (use '99' if N/A):

Maximum Lung Growth: \_\_\_\_ . \_\_\_\_

Start of Plateau: \_\_\_\_ . \_\_\_\_

Start of Decline: \_\_\_\_ . \_\_\_\_

### Pre-BD FEV1 Data and Percentiles: 1558

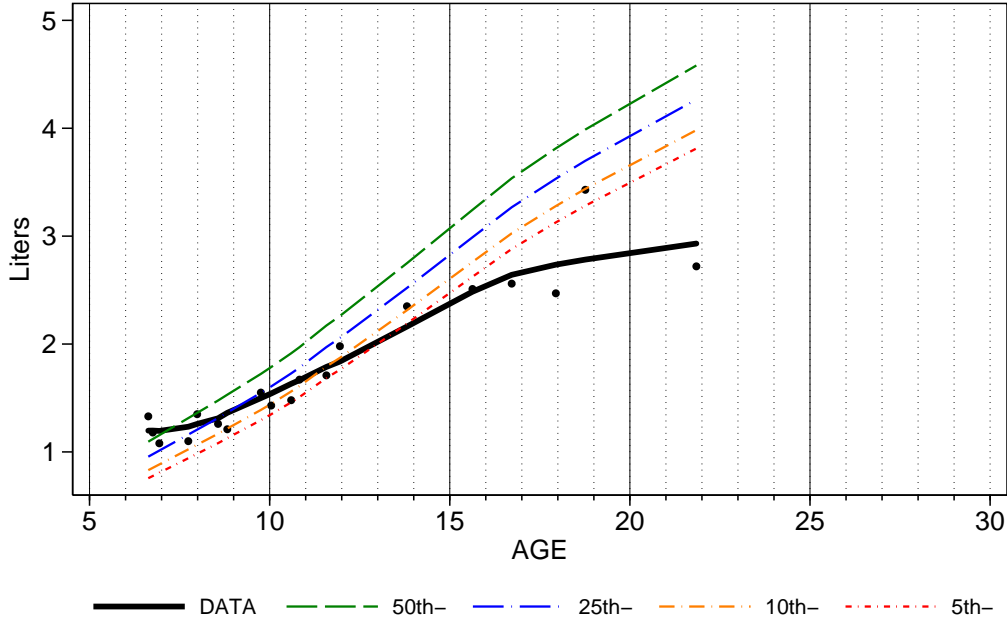

1558

**PATTERN OF GROWTH/DECLINE (Check One)**

- ( 1) Normal Growth
- ( 2) Normal Growth, Early Decline
- ( 3) Reduced Growth
- ( 4) Reduced Growth, Early Decline
- ( 9) Undetermined Pattern
- ( 8) Undetermined - not enough data

Maximum lung growth attained: ( 1) Yes ( 0) No

Plateau started: ( 2) No plateau ( 1) Yes ( 0) No

Decline started: ( 1) Yes ( 0) No

AGE AT each of the following periods (use '99' if N/A):

Maximum Lung Growth: \_\_\_\_ . \_\_\_\_

Start of Plateau: \_\_\_\_ . \_\_\_\_

Start of Decline: \_\_\_\_ . \_\_\_\_

### Pre-BD FEV1 Data and Percentiles: 1569

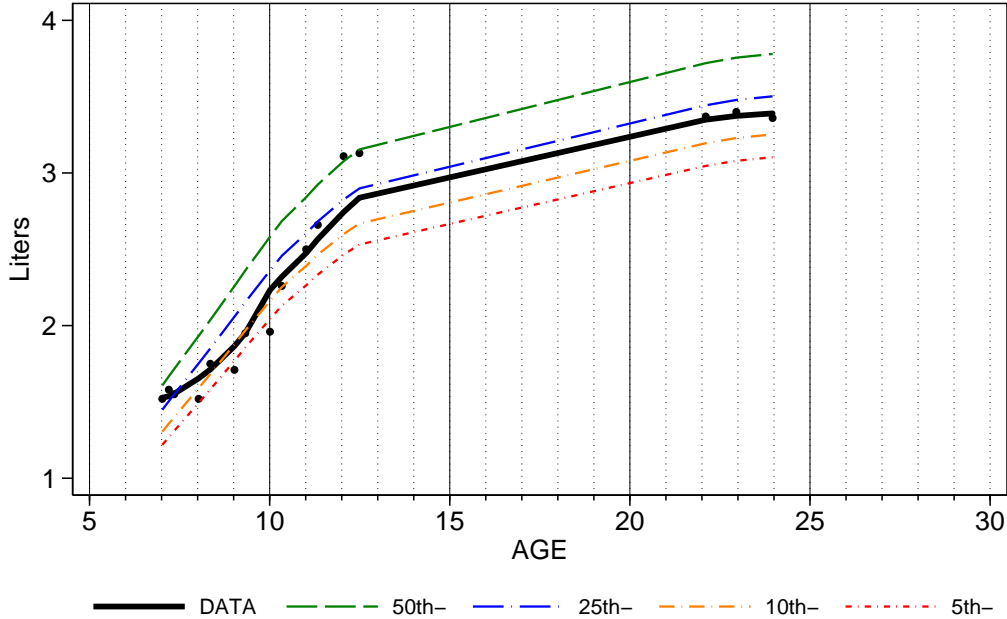

1569

**PATTERN OF GROWTH/DECLINE (Check One)**

- ( 1) Normal Growth
- ( 2) Normal Growth, Early Decline
- ( 3) Reduced Growth
- ( 4) Reduced Growth, Early Decline
- ( 9) Undetermined Pattern
- ( 8) Undetermined - not enough data

Maximum lung growth attained: ( 1) Yes ( 0) No

Plateau started: ( 2) No plateau ( 1) Yes ( 0) No

Decline started: ( 1) Yes ( 0) No

AGE AT each of the following periods (use '99' if N/A):

Maximum Lung Growth: \_\_\_\_ . \_\_\_\_

Start of Plateau: \_\_\_\_ . \_\_\_\_

Start of Decline: \_\_\_\_ . \_\_\_\_

### Pre-BD FEV1 Data and Percentiles: 1571

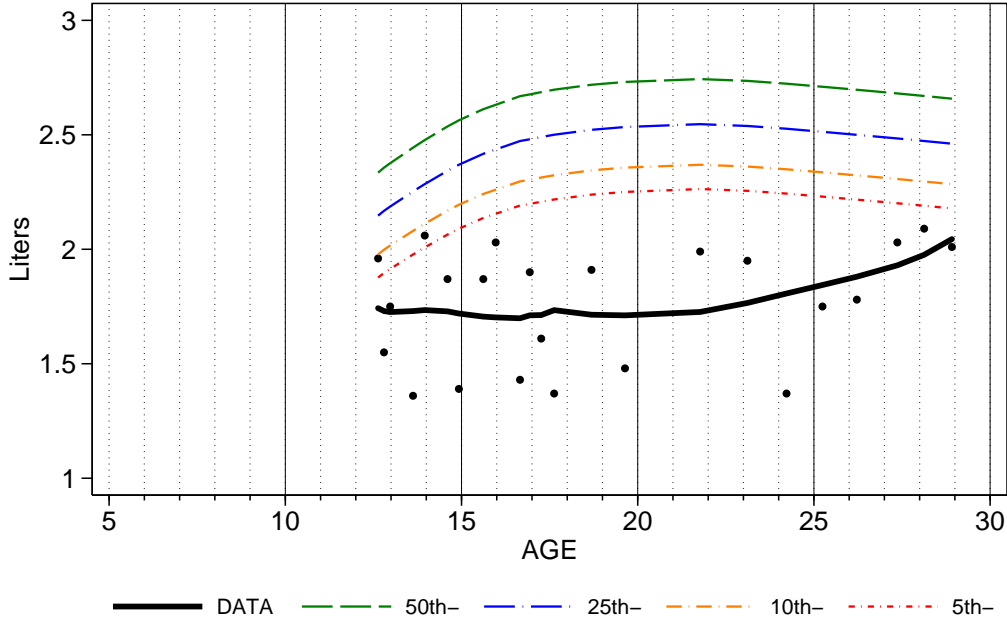

1571

**PATTERN OF GROWTH/DECLINE (Check One)**

- ( 1) Normal Growth
- ( 2) Normal Growth, Early Decline
- ( 3) Reduced Growth
- ( 4) Reduced Growth, Early Decline
- ( 9) Undetermined Pattern
- ( 8) Undetermined - not enough data

Maximum lung growth attained: ( 1) Yes ( 0) No

Plateau started: ( 2) No plateau ( 1) Yes ( 0) No

Decline started: ( 1) Yes ( 0) No

AGE AT each of the following periods (use '99' if N/A):

Maximum Lung Growth: \_\_\_\_ . \_\_\_\_

Start of Plateau: \_\_\_\_ . \_\_\_\_

Start of Decline: \_\_\_\_ . \_\_\_\_

### Pre-BD FEV1 Data and Percentiles: 1572

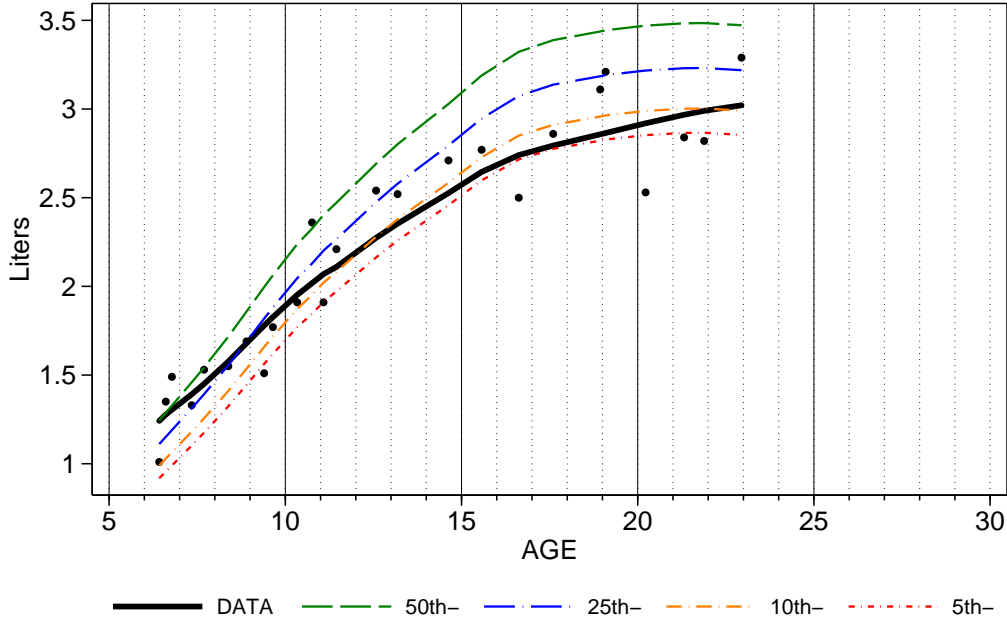

1572

**PATTERN OF GROWTH/DECLINE (Check One)**

- ( 1 ) Normal Growth
- ( 2 ) Normal Growth, Early Decline
- ( 3 ) Reduced Growth
- ( 4 ) Reduced Growth, Early Decline
- ( 9 ) Undetermined Pattern
- ( 8 ) Undetermined - not enough data

Maximum lung growth attained: ( 1 ) Yes ( 0 ) No

Plateau started: ( 2 ) No plateau ( 1 ) Yes ( 0 ) No

Decline started: ( 1 ) Yes ( 0 ) No

AGE AT each of the following periods (use '99' if N/A):

Maximum Lung Growth: \_\_\_\_ . \_\_\_\_

Start of Plateau: \_\_\_\_ . \_\_\_\_

Start of Decline: \_\_\_\_ . \_\_\_\_

### Pre-BD FEV1 Data and Percentiles: 1574

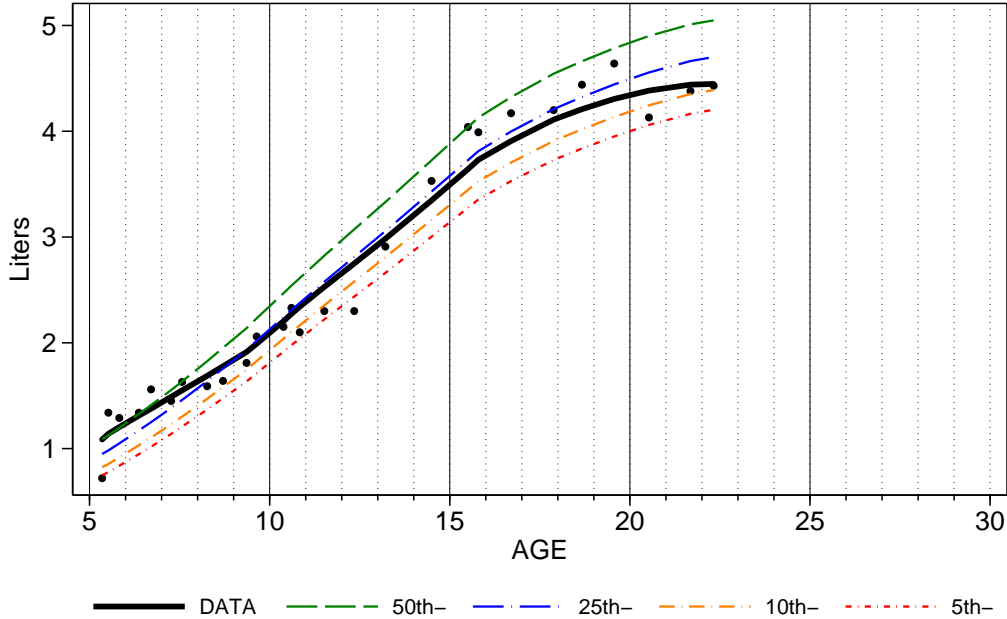

1574

**PATTERN OF GROWTH/DECLINE (Check One)**

- ( 1 ) Normal Growth
- ( 2 ) Normal Growth, Early Decline
- ( 3 ) Reduced Growth
- ( 4 ) Reduced Growth, Early Decline
- ( 9 ) Undetermined Pattern
- ( 8 ) Undetermined - not enough data

Maximum lung growth attained: ( 1 ) Yes ( 0 ) No

Plateau started: ( 2 ) No plateau ( 1 ) Yes ( 0 ) No

Decline started: ( 1 ) Yes ( 0 ) No

AGE AT each of the following periods (use '99' if N/A):

Maximum Lung Growth: \_\_\_\_ . \_\_\_\_

Start of Plateau: \_\_\_\_ . \_\_\_\_

Start of Decline: \_\_\_\_ . \_\_\_\_

### Pre-BD FEV1 Data and Percentiles: 1575

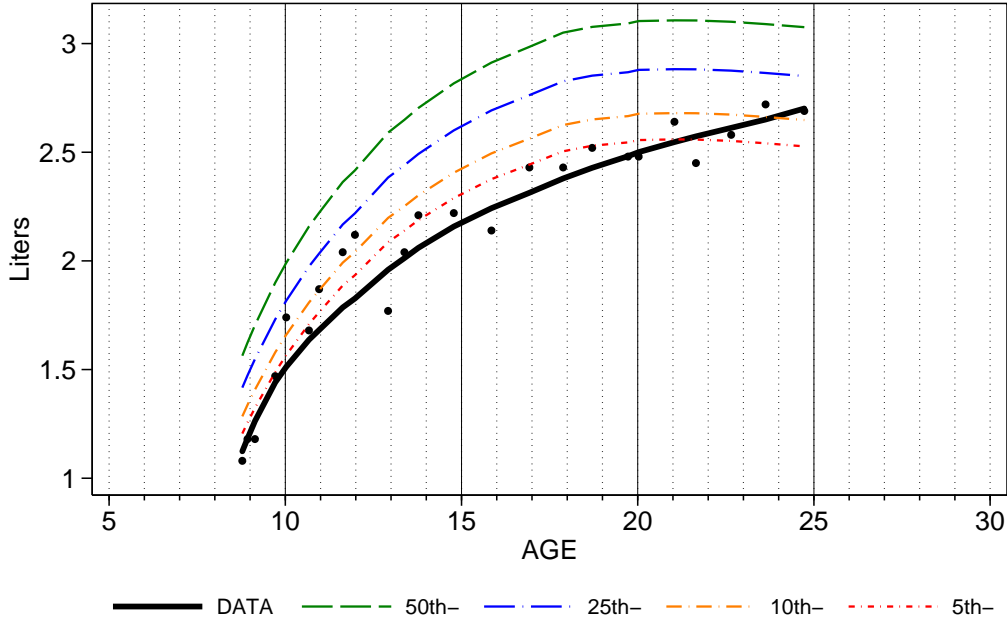

1575

**PATTERN OF GROWTH/DECLINE (Check One)**

- ( 1) Normal Growth
- ( 2) Normal Growth, Early Decline
- ( 3) Reduced Growth
- ( 4) Reduced Growth, Early Decline
- ( 9) Undetermined Pattern
- ( 8) Undetermined - not enough data

Maximum lung growth attained: ( 1) Yes ( 0) No

Plateau started: ( 2) No plateau ( 1) Yes ( 0) No

Decline started: ( 1) Yes ( 0) No

AGE AT each of the following periods (use '99' if N/A):

Maximum Lung Growth: \_\_\_\_ . \_\_\_\_

Start of Plateau: \_\_\_\_ . \_\_\_\_

Start of Decline: \_\_\_\_ . \_\_\_\_



### Pre-BD FEV1 Data and Percentiles: 1576

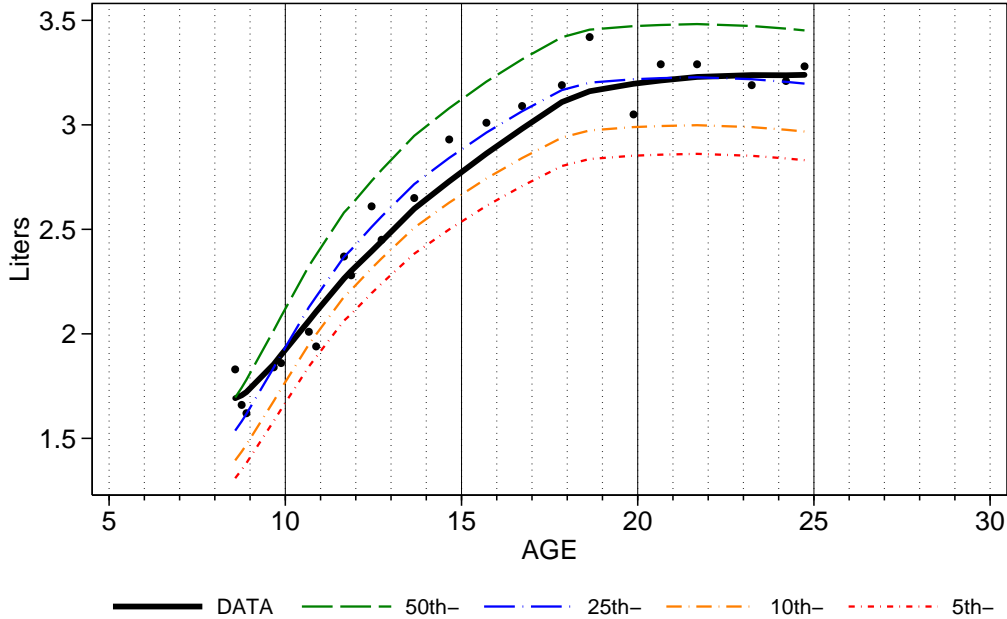

1576

**PATTERN OF GROWTH/DECLINE (Check One)**

- ( 1 ) Normal Growth
- ( 2 ) Normal Growth, Early Decline
- ( 3 ) Reduced Growth
- ( 4 ) Reduced Growth, Early Decline
- ( 9 ) Undetermined Pattern
- ( 8 ) Undetermined - not enough data

Maximum lung growth attained: ( 1 ) Yes ( 0 ) No

Plateau started: ( 2 ) No plateau ( 1 ) Yes ( 0 ) No

Decline started: ( 1 ) Yes ( 0 ) No

AGE AT each of the following periods (use '99' if N/A):

Maximum Lung Growth: \_\_\_\_ . \_\_\_\_

Start of Plateau: \_\_\_\_ . \_\_\_\_

Start of Decline: \_\_\_\_ . \_\_\_\_

### Pre-BD FEV1 Data and Percentiles: 1583

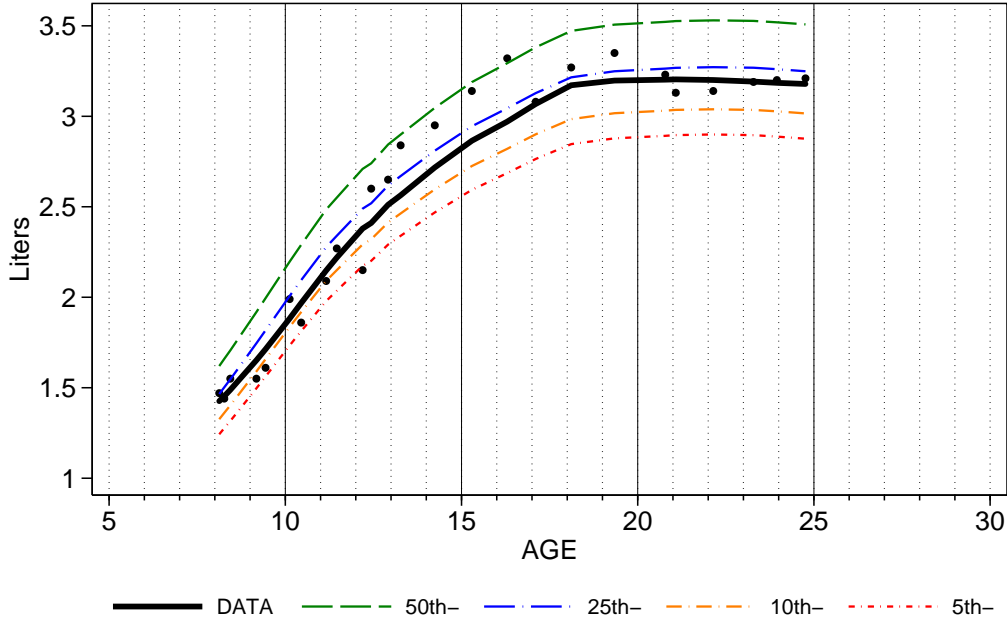

1583

**PATTERN OF GROWTH/DECLINE (Check One)**

- ( 1) Normal Growth
- ( 2) Normal Growth, Early Decline
- ( 3) Reduced Growth
- ( 4) Reduced Growth, Early Decline
- ( 9) Undetermined Pattern
- ( 8) Undetermined - not enough data

Maximum lung growth attained: ( 1) Yes ( 0) No

Plateau started: ( 2) No plateau ( 1) Yes ( 0) No

Decline started: ( 1) Yes ( 0) No

AGE AT each of the following periods (use '99' if N/A):

Maximum Lung Growth: \_\_\_\_ . \_\_\_\_

Start of Plateau: \_\_\_\_ . \_\_\_\_

Start of Decline: \_\_\_\_ . \_\_\_\_

### Pre-BD FEV1 Data and Percentiles: 1589

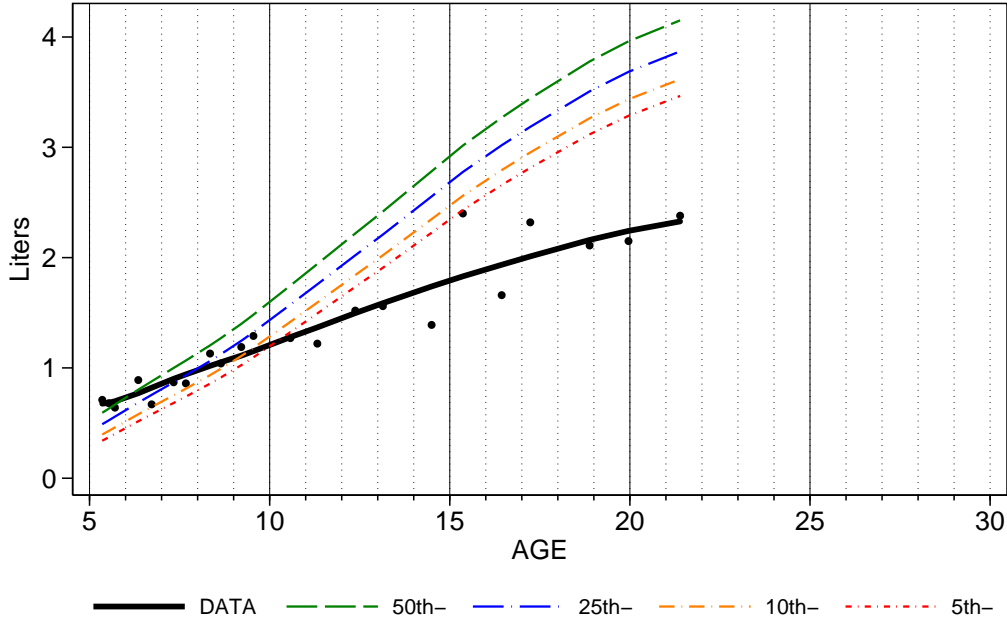

1589

**PATTERN OF GROWTH/DECLINE (Check One)**

- ( 1 ) Normal Growth
- ( 2 ) Normal Growth, Early Decline
- ( 3 ) Reduced Growth
- ( 4 ) Reduced Growth, Early Decline
- ( 9 ) Undetermined Pattern
- ( 8 ) Undetermined - not enough data

Maximum lung growth attained: ( 1 ) Yes ( 0 ) No

Plateau started: ( 2 ) No plateau ( 1 ) Yes ( 0 ) No

Decline started: ( 1 ) Yes ( 0 ) No

AGE AT each of the following periods (use '99' if N/A):

Maximum Lung Growth: \_\_\_\_ . \_\_\_\_

Start of Plateau: \_\_\_\_ . \_\_\_\_

Start of Decline: \_\_\_\_ . \_\_\_\_

### Pre-BD FEV1 Data and Percentiles: 1600

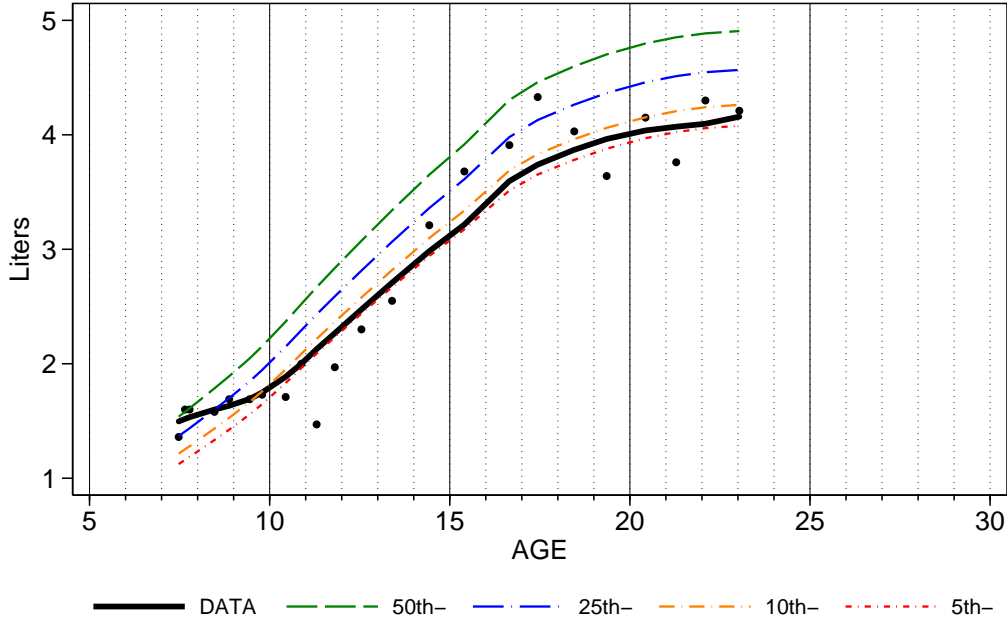

1600

**PATTERN OF GROWTH/DECLINE (Check One)**

- ( 1 ) Normal Growth
- ( 2 ) Normal Growth, Early Decline
- ( 3 ) Reduced Growth
- ( 4 ) Reduced Growth, Early Decline
- ( 9 ) Undetermined Pattern
- ( 8 ) Undetermined - not enough data

Maximum lung growth attained: ( 1 ) Yes ( 0 ) No

Plateau started: ( 2 ) No plateau ( 1 ) Yes ( 0 ) No

Decline started: ( 1 ) Yes ( 0 ) No

AGE AT each of the following periods (use '99' if N/A):

Maximum Lung Growth: \_\_\_\_ . \_\_\_\_

Start of Plateau: \_\_\_\_ . \_\_\_\_

Start of Decline: \_\_\_\_ . \_\_\_\_

### Pre-BD FEV1 Data and Percentiles: 1601

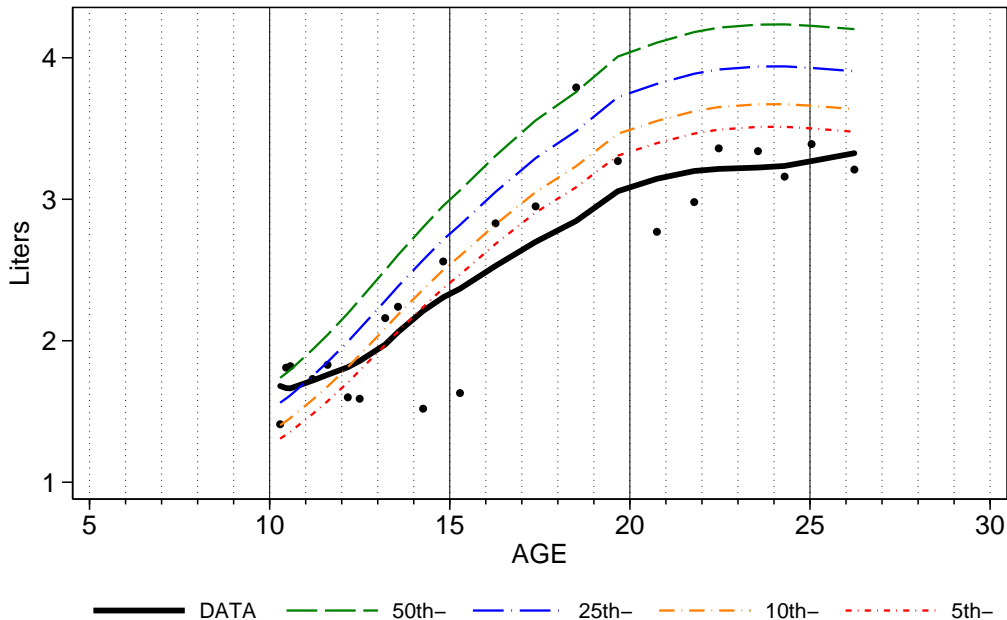

1601

**PATTERN OF GROWTH/DECLINE (Check One)**

- ( 1 ) Normal Growth
- ( 2 ) Normal Growth, Early Decline
- ( 3 ) Reduced Growth
- ( 4 ) Reduced Growth, Early Decline
- ( 9 ) Undetermined Pattern
- ( 8 ) Undetermined - not enough data

Maximum lung growth attained: ( 1 ) Yes ( 0 ) No

Plateau started: ( 2 ) No plateau ( 1 ) Yes ( 0 ) No

Decline started: ( 1 ) Yes ( 0 ) No

AGE AT each of the following periods (use '99' if N/A):

Maximum Lung Growth: \_\_\_\_ . \_\_\_\_

Start of Plateau: \_\_\_\_ . \_\_\_\_

Start of Decline: \_\_\_\_ . \_\_\_\_

### Pre-BD FEV1 Data and Percentiles: 1603

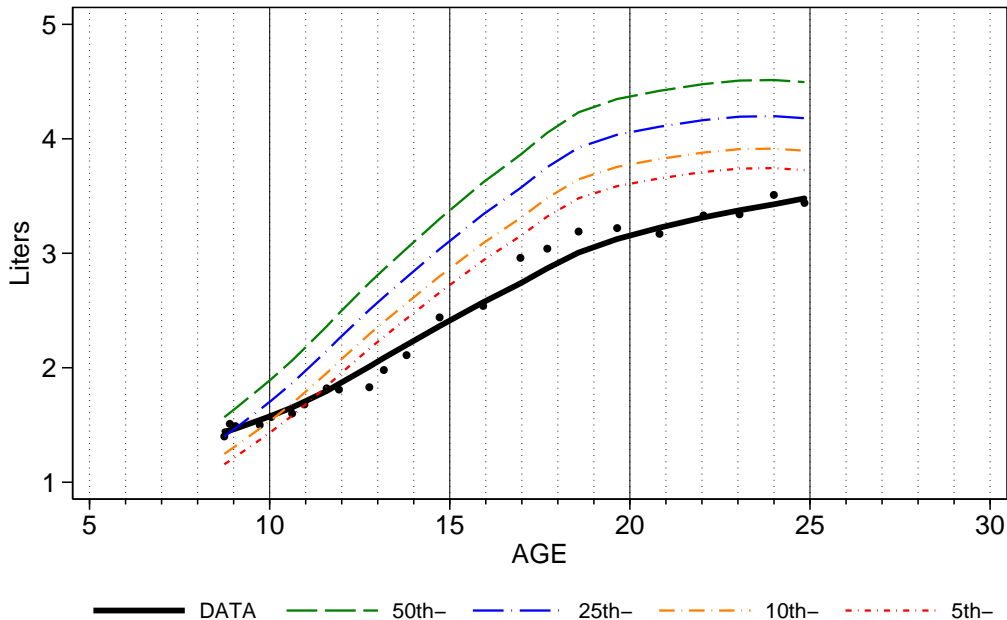

1603

**PATTERN OF GROWTH/DECLINE (Check One)**

- ( 1) Normal Growth
- ( 2) Normal Growth, Early Decline
- ( 3) Reduced Growth
- ( 4) Reduced Growth, Early Decline
- ( 9) Undetermined Pattern
- ( 8) Undetermined - not enough data

Maximum lung growth attained: ( 1) Yes ( 0) No

Plateau started: ( 2) No plateau ( 1) Yes ( 0) No

Decline started: ( 1) Yes ( 0) No

AGE AT each of the following periods (use '99' if N/A):

Maximum Lung Growth: \_\_\_\_ . \_\_\_\_

Start of Plateau: \_\_\_\_ . \_\_\_\_

Start of Decline: \_\_\_\_ . \_\_\_\_

### Pre-BD FEV1 Data and Percentiles: 1613

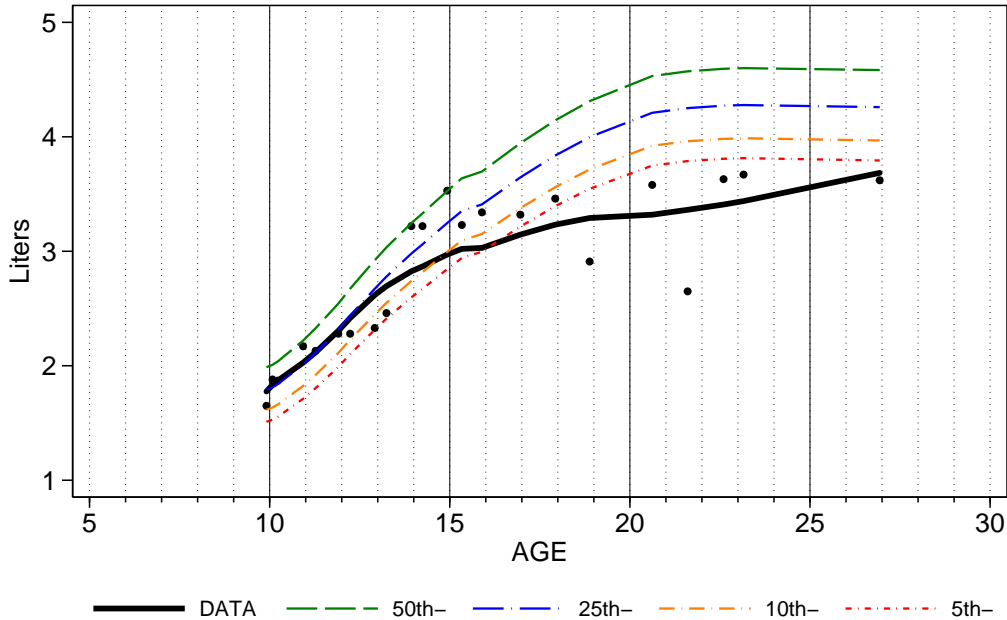

1613

**PATTERN OF GROWTH/DECLINE (Check One)**

- ( 1 ) Normal Growth
- ( 2 ) Normal Growth, Early Decline
- ( 3 ) Reduced Growth
- ( 4 ) Reduced Growth, Early Decline
- ( 9 ) Undetermined Pattern
- ( 8 ) Undetermined - not enough data

Maximum lung growth attained: ( 1 ) Yes ( 0 ) No

Plateau started: ( 2 ) No plateau ( 1 ) Yes ( 0 ) No

Decline started: ( 1 ) Yes ( 0 ) No

AGE AT each of the following periods (use '99' if N/A):

Maximum Lung Growth: \_\_\_\_ . \_\_\_\_

Start of Plateau: \_\_\_\_ . \_\_\_\_

Start of Decline: \_\_\_\_ . \_\_\_\_

### Pre-BD FEV1 Data and Percentiles: 1614

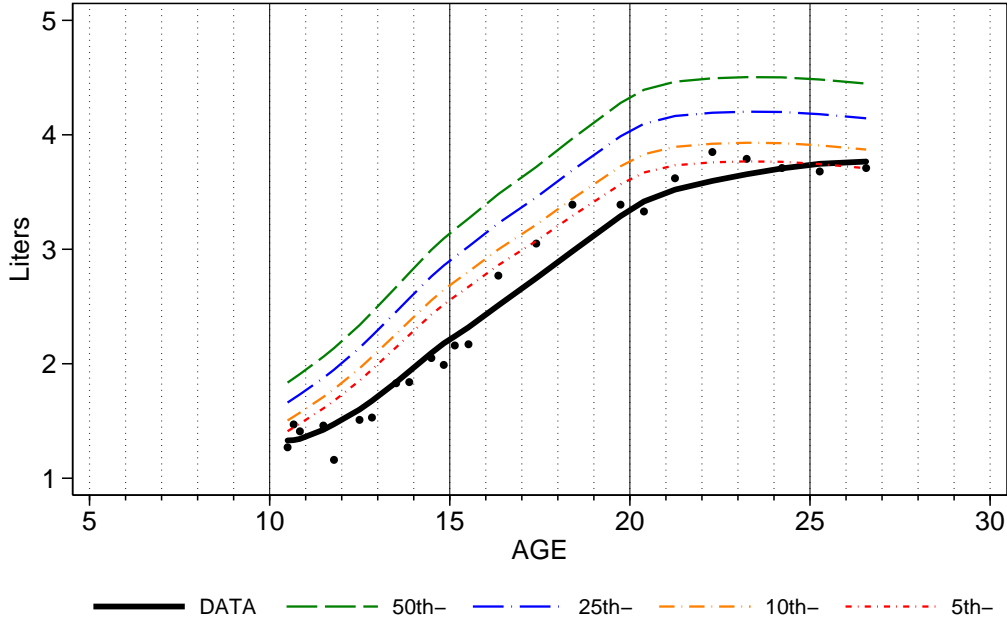

1614

**PATTERN OF GROWTH/DECLINE (Check One)**

- ( 1 ) Normal Growth
- ( 2 ) Normal Growth, Early Decline
- ( 3 ) Reduced Growth
- ( 4 ) Reduced Growth, Early Decline
- ( 9 ) Undetermined Pattern
- ( 8 ) Undetermined - not enough data

Maximum lung growth attained: ( 1 ) Yes ( 0 ) No

Plateau started: ( 2 ) No plateau ( 1 ) Yes ( 0 ) No

Decline started: ( 1 ) Yes ( 0 ) No

AGE AT each of the following periods (use '99' if N/A):

Maximum Lung Growth: \_\_\_\_ . \_\_\_\_

Start of Plateau: \_\_\_\_ . \_\_\_\_

Start of Decline: \_\_\_\_ . \_\_\_\_



### Pre-BD FEV1 Data and Percentiles: 1617

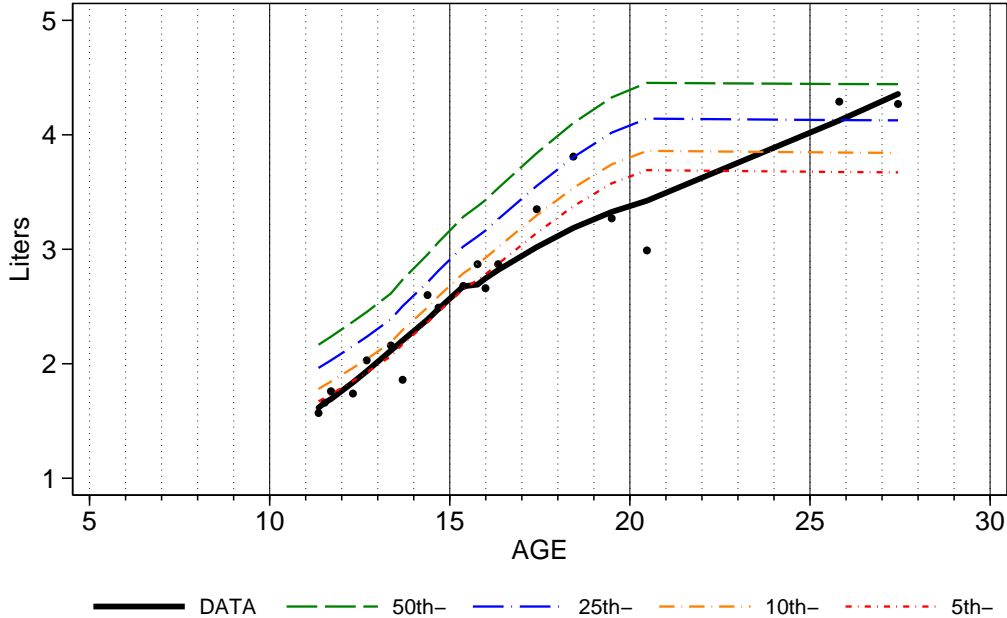

1617

**PATTERN OF GROWTH/DECLINE (Check One)**

- ( 1 ) Normal Growth
- ( 2 ) Normal Growth, Early Decline
- ( 3 ) Reduced Growth
- ( 4 ) Reduced Growth, Early Decline
- ( 9 ) Undetermined Pattern
- ( 8 ) Undetermined - not enough data

Maximum lung growth attained: ( 1 ) Yes ( 0 ) No

Plateau started: ( 2 ) No plateau ( 1 ) Yes ( 0 ) No

Decline started: ( 1 ) Yes ( 0 ) No

AGE AT each of the following periods (use '99' if N/A):

Maximum Lung Growth: \_\_\_\_ . \_\_\_\_

Start of Plateau: \_\_\_\_ . \_\_\_\_

Start of Decline: \_\_\_\_ . \_\_\_\_

### Pre-BD FEV1 Data and Percentiles: 1620

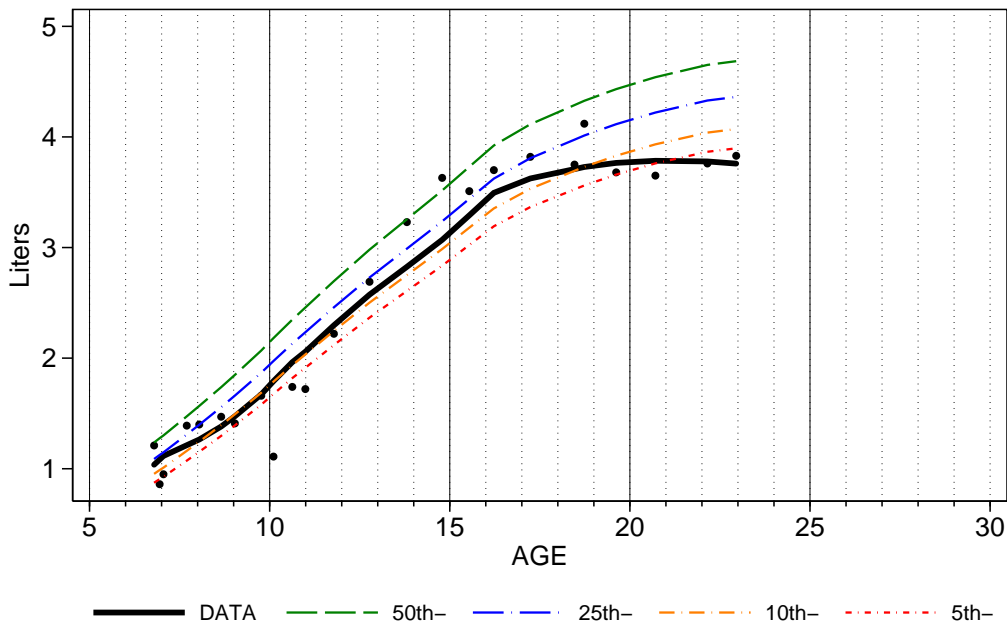

1620

**PATTERN OF GROWTH/DECLINE (Check One)**

- ( 1 ) Normal Growth
- ( 2 ) Normal Growth, Early Decline
- ( 3 ) Reduced Growth
- ( 4 ) Reduced Growth, Early Decline
- ( 9 ) Undetermined Pattern
- ( 8 ) Undetermined - not enough data

Maximum lung growth attained: ( 1 ) Yes ( 0 ) No

Plateau started: ( 2 ) No plateau ( 1 ) Yes ( 0 ) No

Decline started: ( 1 ) Yes ( 0 ) No

AGE AT each of the following periods (use '99' if N/A):

Maximum Lung Growth: \_\_\_\_ . \_\_\_\_

Start of Plateau: \_\_\_\_ . \_\_\_\_

Start of Decline: \_\_\_\_ . \_\_\_\_

### Pre-BD FEV1 Data and Percentiles: 1623

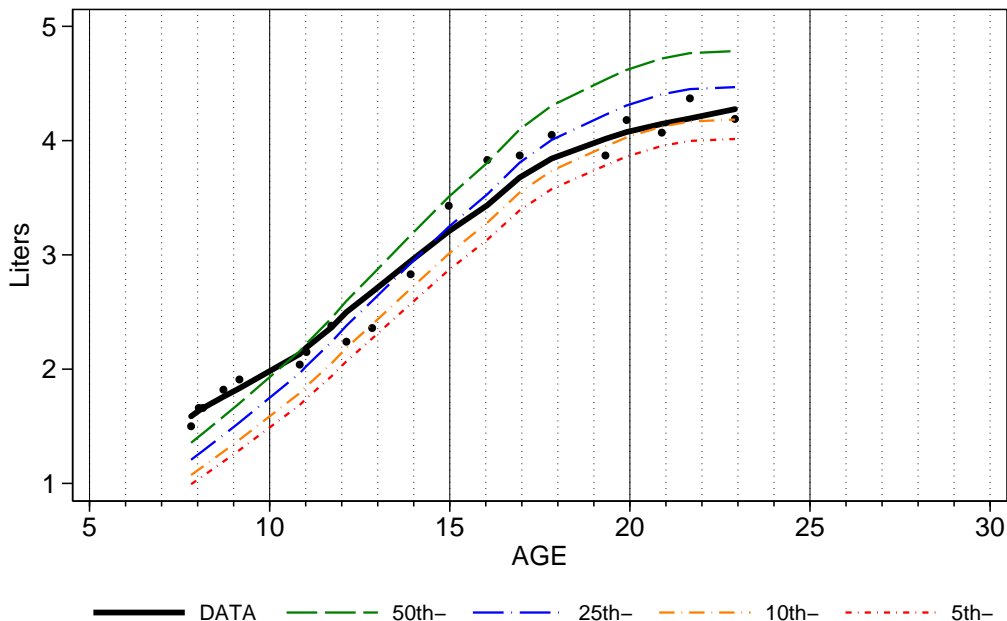

1623

**PATTERN OF GROWTH/DECLINE (Check One)**

- ( 1 ) Normal Growth
- ( 2 ) Normal Growth, Early Decline
- ( 3 ) Reduced Growth
- ( 4 ) Reduced Growth, Early Decline
- ( 9 ) Undetermined Pattern
- ( 8 ) Undetermined - not enough data

Maximum lung growth attained: ( 1 ) Yes ( 0 ) No

Plateau started: ( 2 ) No plateau ( 1 ) Yes ( 0 ) No

Decline started: ( 1 ) Yes ( 0 ) No

AGE AT each of the following periods (use '99' if N/A):

Maximum Lung Growth: \_\_\_\_ . \_\_\_\_

Start of Plateau: \_\_\_\_ . \_\_\_\_

Start of Decline: \_\_\_\_ . \_\_\_\_

### Pre-BD FEV1 Data and Percentiles: 1624

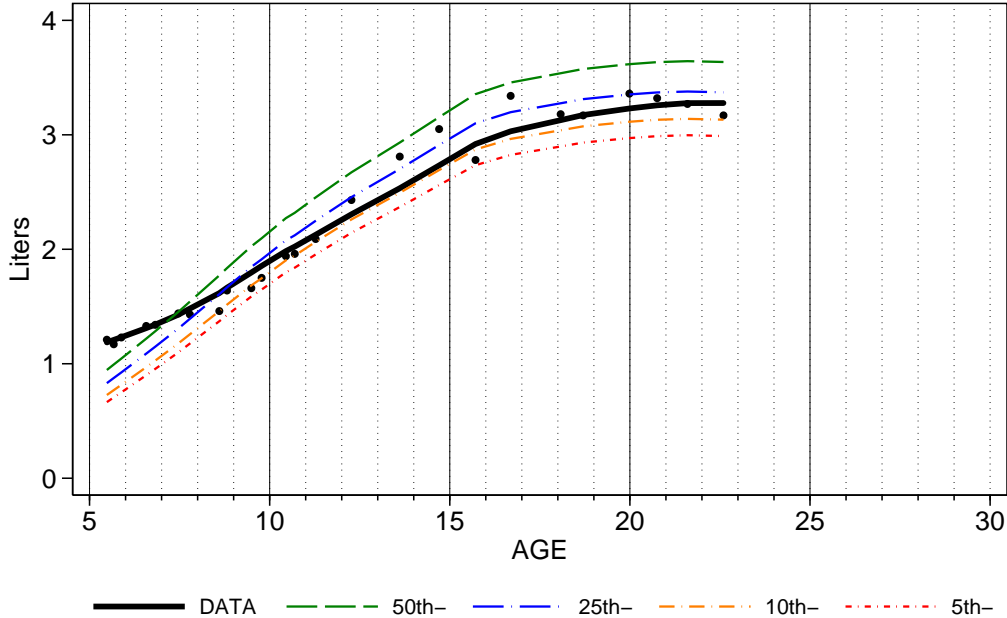

1624

**PATTERN OF GROWTH/DECLINE (Check One)**

- ( 1) Normal Growth
- ( 2) Normal Growth, Early Decline
- ( 3) Reduced Growth
- ( 4) Reduced Growth, Early Decline
- ( 9) Undetermined Pattern
- ( 8) Undetermined - not enough data

Maximum lung growth attained: ( 1) Yes ( 0) No

Plateau started: ( 2) No plateau ( 1) Yes ( 0) No

Decline started: ( 1) Yes ( 0) No

AGE AT each of the following periods (use '99' if N/A):

Maximum Lung Growth: \_\_\_\_ . \_\_\_\_

Start of Plateau: \_\_\_\_ . \_\_\_\_

Start of Decline: \_\_\_\_ . \_\_\_\_

### Pre-BD FEV1 Data and Percentiles: 1628

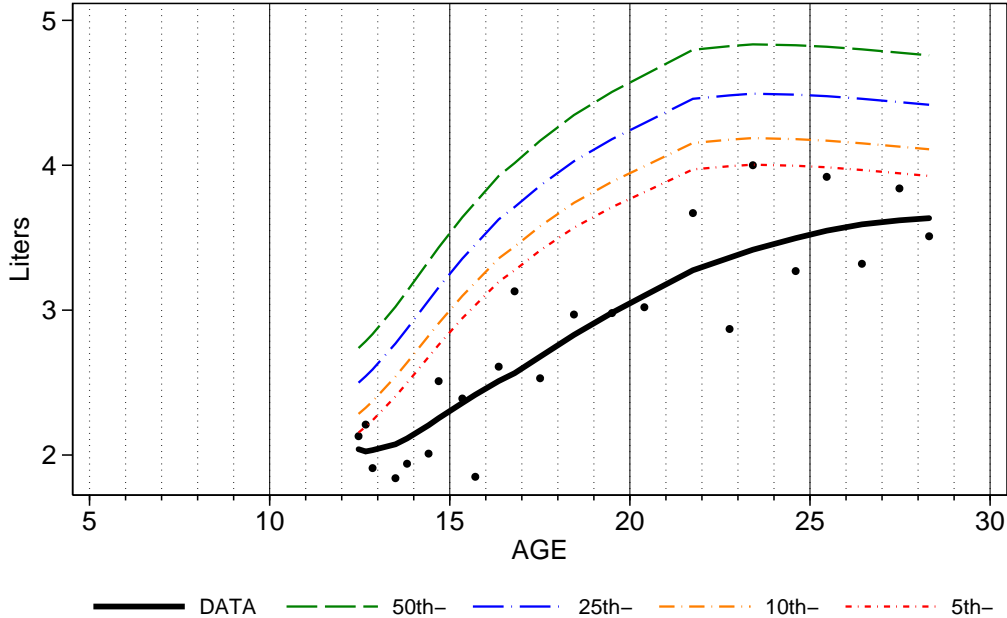

1628

**PATTERN OF GROWTH/DECLINE (Check One)**

- ( 1 ) Normal Growth
- ( 2 ) Normal Growth, Early Decline
- ( 3 ) Reduced Growth
- ( 4 ) Reduced Growth, Early Decline
- ( 9 ) Undetermined Pattern
- ( 8 ) Undetermined - not enough data

Maximum lung growth attained: ( 1 ) Yes ( 0 ) No

Plateau started: ( 2 ) No plateau ( 1 ) Yes ( 0 ) No

Decline started: ( 1 ) Yes ( 0 ) No

AGE AT each of the following periods (use '99' if N/A):

Maximum Lung Growth: \_\_\_\_ . \_\_\_\_

Start of Plateau: \_\_\_\_ . \_\_\_\_

Start of Decline: \_\_\_\_ . \_\_\_\_

### Pre-BD FEV1 Data and Percentiles: 1629

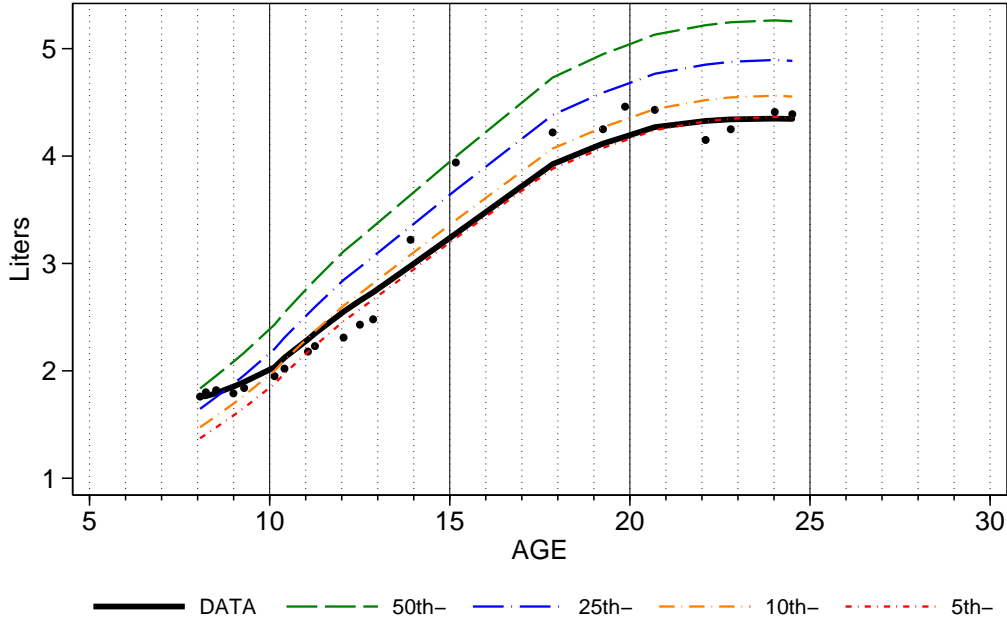

1629

**PATTERN OF GROWTH/DECLINE (Check One)**

- ( 1) Normal Growth
- ( 2) Normal Growth, Early Decline
- ( 3) Reduced Growth
- ( 4) Reduced Growth, Early Decline
- ( 9) Undetermined Pattern
- ( 8) Undetermined - not enough data

Maximum lung growth attained: ( 1) Yes ( 0) No

Plateau started: ( 2) No plateau ( 1) Yes ( 0) No

Decline started: ( 1) Yes ( 0) No

AGE AT each of the following periods (use '99' if N/A):

Maximum Lung Growth: \_\_\_\_ . \_\_\_\_

Start of Plateau: \_\_\_\_ . \_\_\_\_

Start of Decline: \_\_\_\_ . \_\_\_\_

### Pre-BD FEV1 Data and Percentiles: 1631

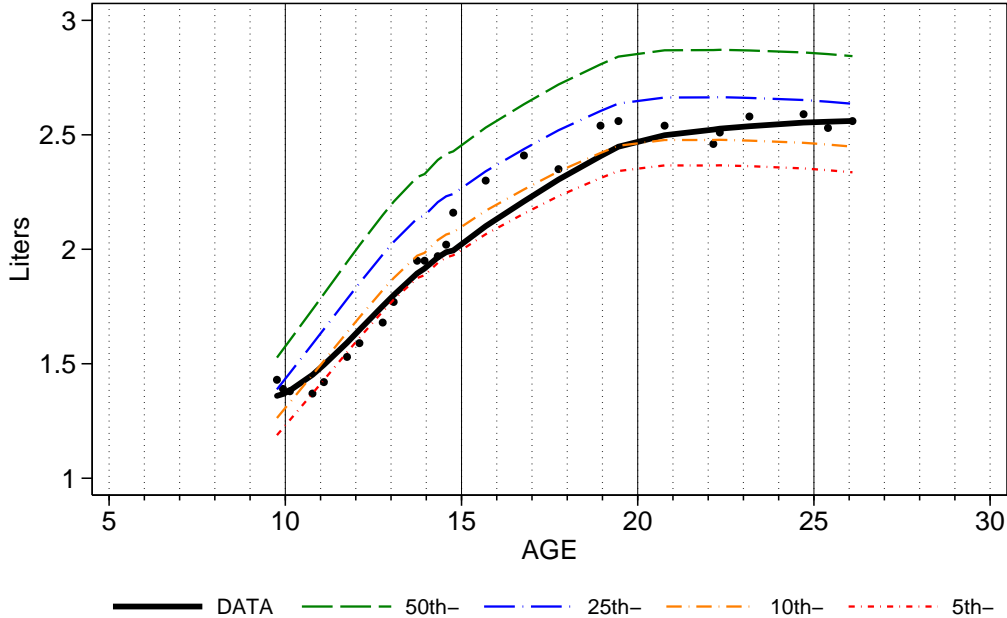

1631

**PATTERN OF GROWTH/DECLINE (Check One)**

- ( 1) Normal Growth
- ( 2) Normal Growth, Early Decline
- ( 3) Reduced Growth
- ( 4) Reduced Growth, Early Decline
- ( 9) Undetermined Pattern
- ( 8) Undetermined - not enough data

Maximum lung growth attained: ( 1) Yes ( 0) No

Plateau started: ( 2) No plateau ( 1) Yes ( 0) No

Decline started: ( 1) Yes ( 0) No

AGE AT each of the following periods (use '99' if N/A):

Maximum Lung Growth: \_\_\_\_ . \_\_\_\_

Start of Plateau: \_\_\_\_ . \_\_\_\_

Start of Decline: \_\_\_\_ . \_\_\_\_

### Pre-BD FEV1 Data and Percentiles: 1639

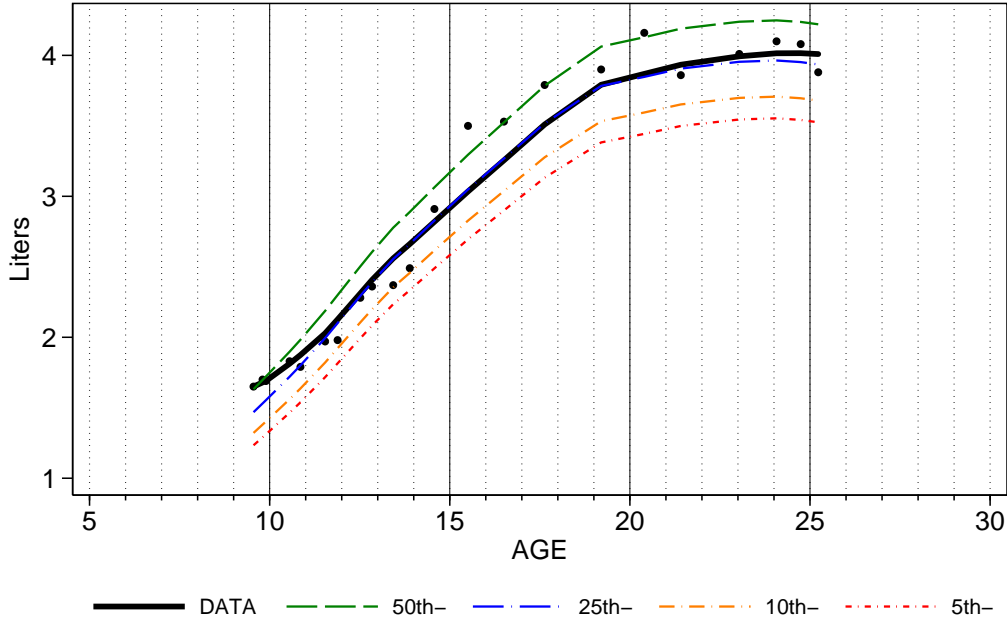

1639

**PATTERN OF GROWTH/DECLINE (Check One)**

- ( 1) Normal Growth
- ( 2) Normal Growth, Early Decline
- ( 3) Reduced Growth
- ( 4) Reduced Growth, Early Decline
- ( 9) Undetermined Pattern
- ( 8) Undetermined - not enough data

Maximum lung growth attained: ( 1) Yes ( 0) No

Plateau started: ( 2) No plateau ( 1) Yes ( 0) No

Decline started: ( 1) Yes ( 0) No

AGE AT each of the following periods (use '99' if N/A):

Maximum Lung Growth: \_\_\_\_ . \_\_\_\_

Start of Plateau: \_\_\_\_ . \_\_\_\_

Start of Decline: \_\_\_\_ . \_\_\_\_



### Pre-BD FEV1 Data and Percentiles: 1642

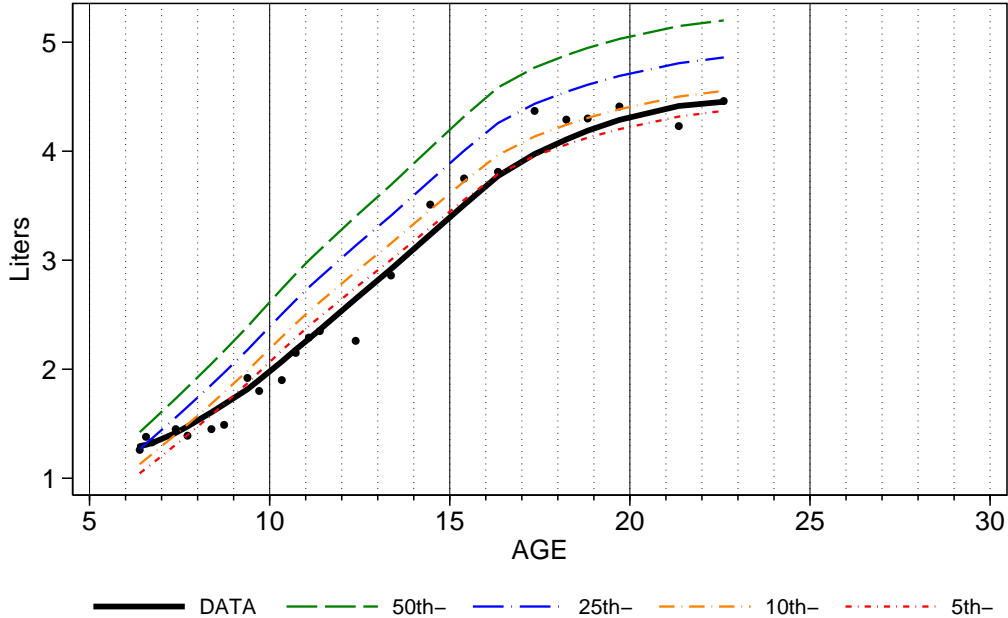

1642

**PATTERN OF GROWTH/DECLINE (Check One)**

- ( 1 ) Normal Growth
- ( 2 ) Normal Growth, Early Decline
- ( 3 ) Reduced Growth
- ( 4 ) Reduced Growth, Early Decline
- ( 9 ) Undetermined Pattern
- ( 8 ) Undetermined - not enough data

Maximum lung growth attained: ( 1 ) Yes ( 0 ) No

Plateau started: ( 2 ) No plateau ( 1 ) Yes ( 0 ) No

Decline started: ( 1 ) Yes ( 0 ) No

AGE AT each of the following periods (use '99' if N/A):

Maximum Lung Growth: \_\_\_\_ . \_\_\_\_

Start of Plateau: \_\_\_\_ . \_\_\_\_

Start of Decline: \_\_\_\_ . \_\_\_\_

### Pre-BD FEV1 Data and Percentiles: 1643

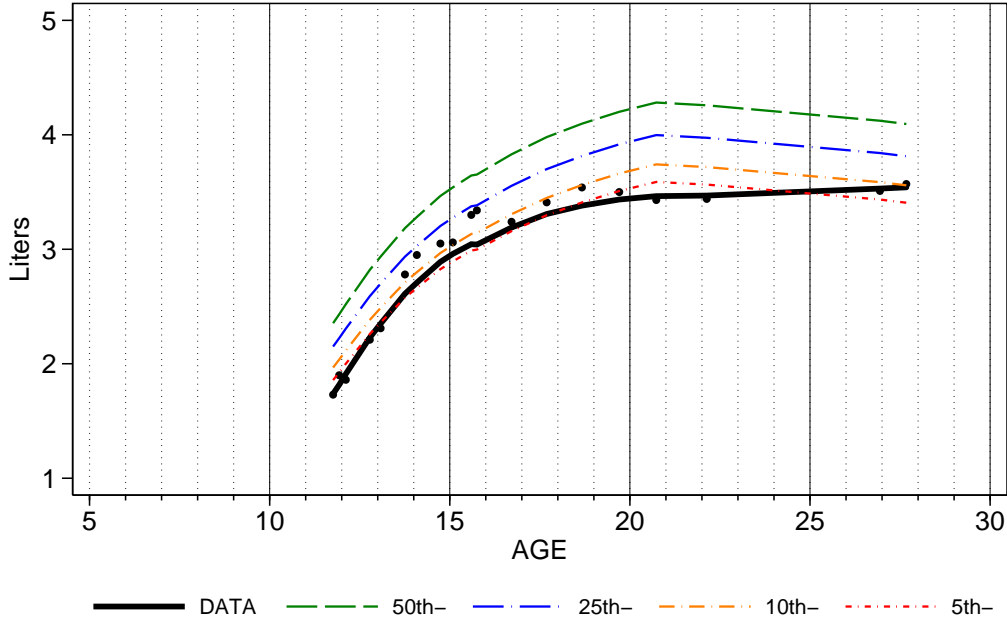

1643

**PATTERN OF GROWTH/DECLINE (Check One)**

- ( 1) Normal Growth
- ( 2) Normal Growth, Early Decline
- ( 3) Reduced Growth
- ( 4) Reduced Growth, Early Decline
- ( 9) Undetermined Pattern
- ( 8) Undetermined - not enough data

Maximum lung growth attained: ( 1) Yes ( 0) No

Plateau started: ( 2) No plateau ( 1) Yes ( 0) No

Decline started: ( 1) Yes ( 0) No

AGE AT each of the following periods (use '99' if N/A):

Maximum Lung Growth: \_\_\_\_ . \_\_\_\_

Start of Plateau: \_\_\_\_ . \_\_\_\_

Start of Decline: \_\_\_\_ . \_\_\_\_

### Pre-BD FEV1 Data and Percentiles: 1650

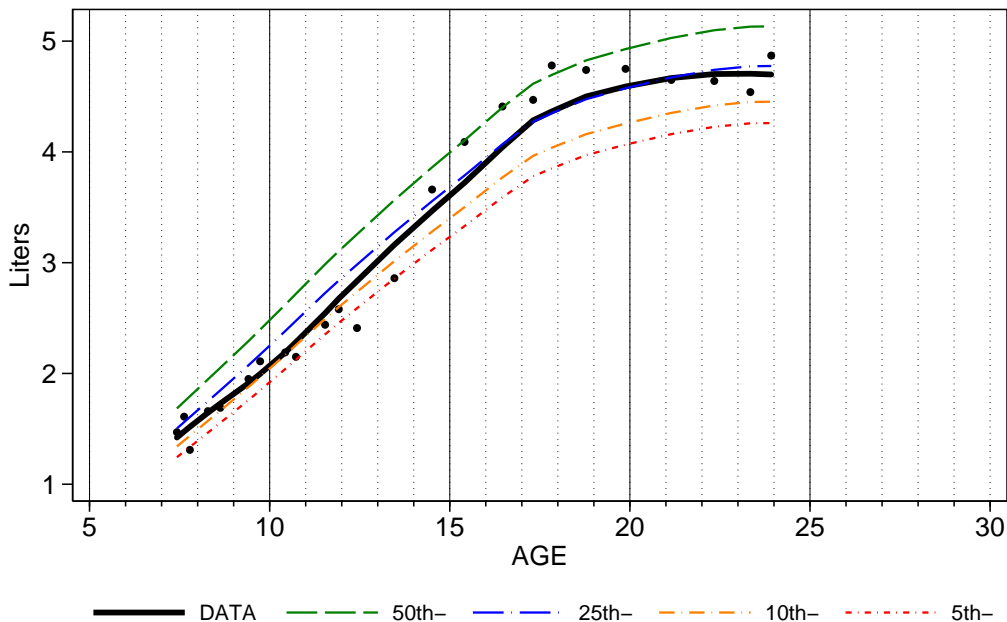

1650

**PATTERN OF GROWTH/DECLINE (Check One)**

- ( 1) Normal Growth
- ( 2) Normal Growth, Early Decline
- ( 3) Reduced Growth
- ( 4) Reduced Growth, Early Decline
- ( 9) Undetermined Pattern
- ( 8) Undetermined - not enough data

Maximum lung growth attained: ( 1) Yes ( 0) No

Plateau started: ( 2) No plateau ( 1) Yes ( 0) No

Decline started: ( 1) Yes ( 0) No

AGE AT each of the following periods (use '99' if N/A):

Maximum Lung Growth: \_\_\_\_ . \_\_\_\_

Start of Plateau: \_\_\_\_ . \_\_\_\_

Start of Decline: \_\_\_\_ . \_\_\_\_

### Pre-BD FEV1 Data and Percentiles: 1652

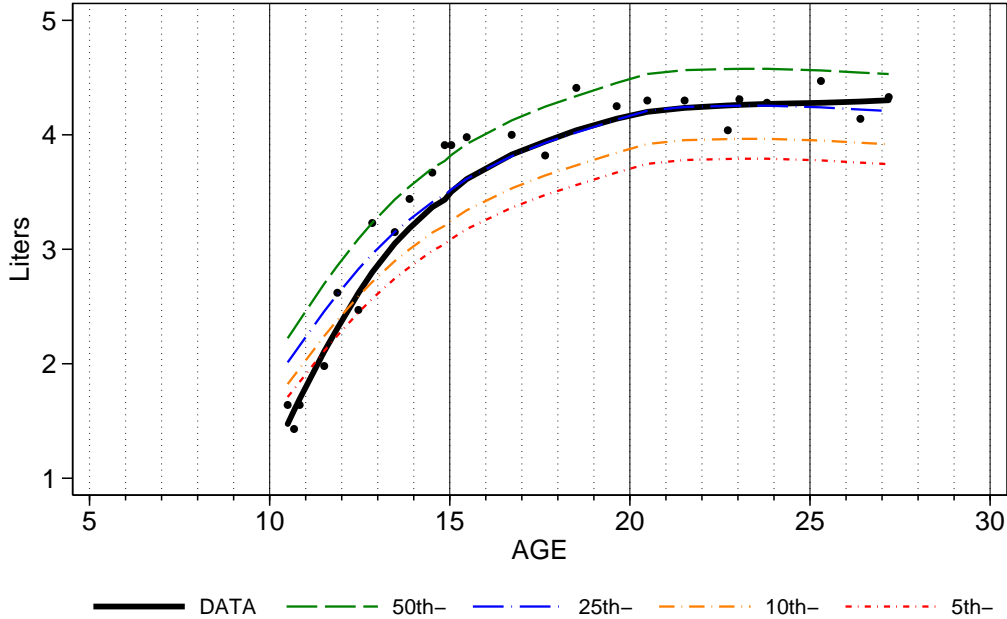

1652

**PATTERN OF GROWTH/DECLINE (Check One)**

- ( 1 ) Normal Growth
- ( 2 ) Normal Growth, Early Decline
- ( 3 ) Reduced Growth
- ( 4 ) Reduced Growth, Early Decline
- ( 9 ) Undetermined Pattern
- ( 8 ) Undetermined - not enough data

Maximum lung growth attained: ( 1 ) Yes ( 0 ) No

Plateau started: ( 2 ) No plateau ( 1 ) Yes ( 0 ) No

Decline started: ( 1 ) Yes ( 0 ) No

AGE AT each of the following periods (use '99' if N/A):

Maximum Lung Growth: \_\_\_\_ . \_\_\_\_

Start of Plateau: \_\_\_\_ . \_\_\_\_

Start of Decline: \_\_\_\_ . \_\_\_\_

### Pre-BD FEV1 Data and Percentiles: 1653

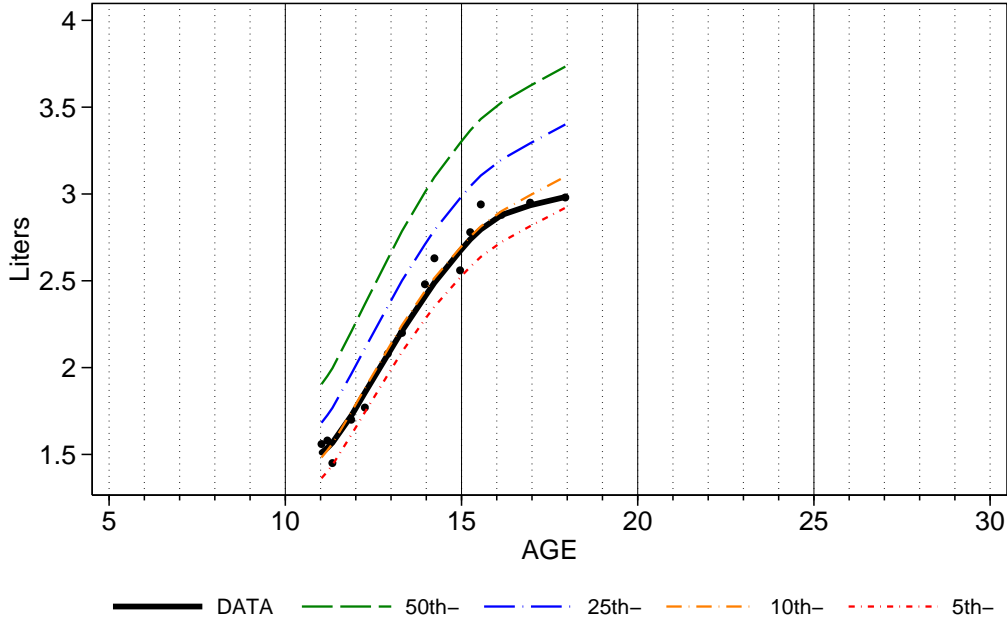

1653

**PATTERN OF GROWTH/DECLINE (Check One)**

- ( 1) Normal Growth
- ( 2) Normal Growth, Early Decline
- ( 3) Reduced Growth
- ( 4) Reduced Growth, Early Decline
- ( 9) Undetermined Pattern
- ( 8) Undetermined - not enough data

Maximum lung growth attained: ( 1) Yes ( 0) No

Plateau started: ( 2) No plateau ( 1) Yes ( 0) No

Decline started: ( 1) Yes ( 0) No

AGE AT each of the following periods (use '99' if N/A):

Maximum Lung Growth: \_\_\_\_ . \_\_\_\_

Start of Plateau: \_\_\_\_ . \_\_\_\_

Start of Decline: \_\_\_\_ . \_\_\_\_

### Pre-BD FEV1 Data and Percentiles: 1657

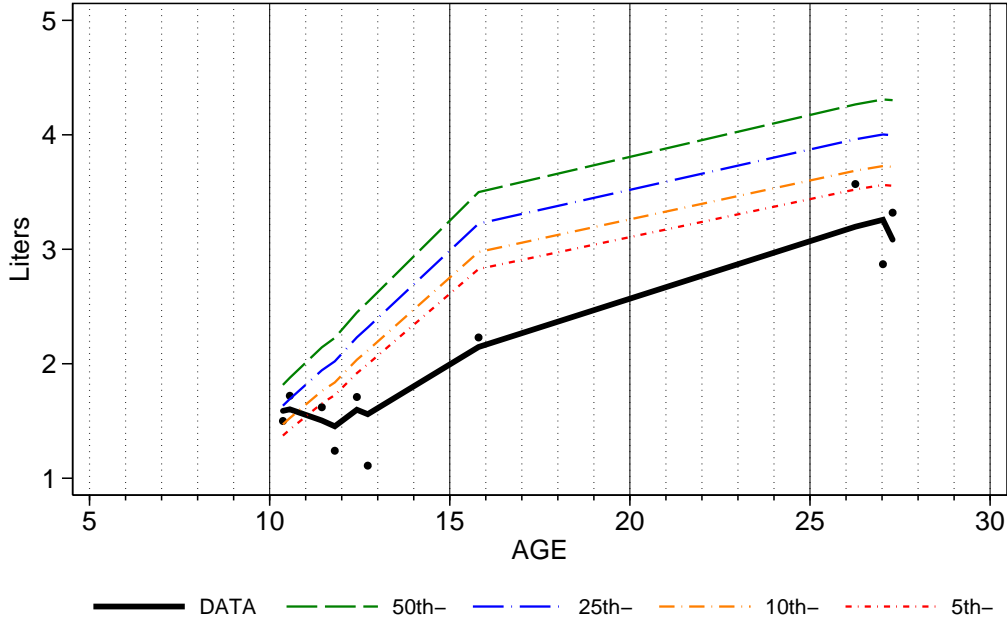

1657

**PATTERN OF GROWTH/DECLINE (Check One)**

- ( 1 ) Normal Growth
- ( 2 ) Normal Growth, Early Decline
- ( 3 ) Reduced Growth
- ( 4 ) Reduced Growth, Early Decline
- ( 9 ) Undetermined Pattern
- ( 8 ) Undetermined - not enough data

Maximum lung growth attained: ( 1 ) Yes ( 0 ) No

Plateau started: ( 2 ) No plateau ( 1 ) Yes ( 0 ) No

Decline started: ( 1 ) Yes ( 0 ) No

AGE AT each of the following periods (use '99' if N/A):

Maximum Lung Growth: \_\_\_\_ . \_\_\_\_

Start of Plateau: \_\_\_\_ . \_\_\_\_

Start of Decline: \_\_\_\_ . \_\_\_\_

### Pre-BD FEV1 Data and Percentiles: 1658

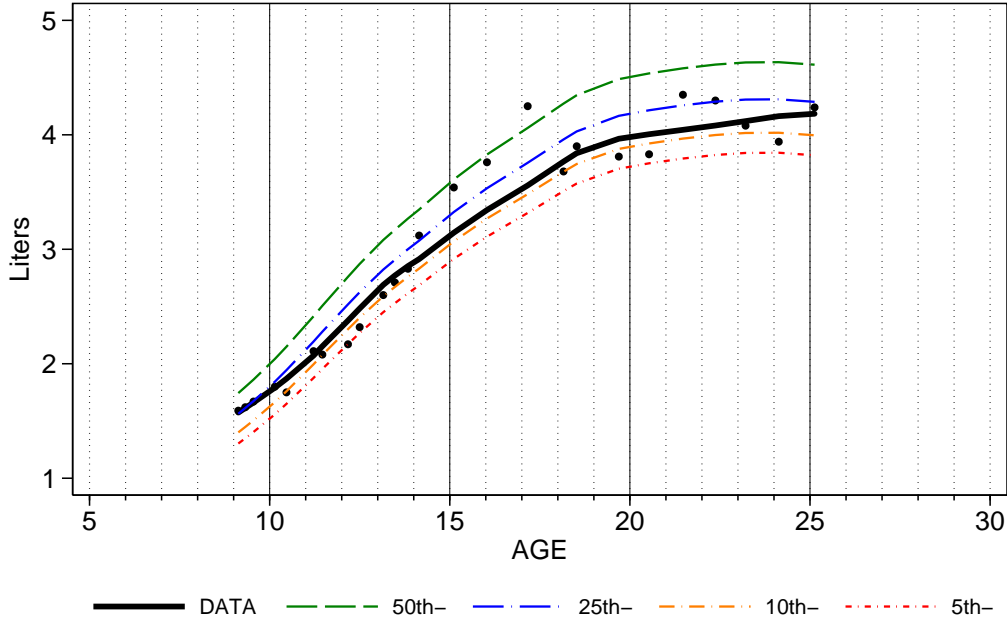

1658

**PATTERN OF GROWTH/DECLINE (Check One)**

- ( 1 ) Normal Growth
- ( 2 ) Normal Growth, Early Decline
- ( 3 ) Reduced Growth
- ( 4 ) Reduced Growth, Early Decline
- ( 9 ) Undetermined Pattern
- ( 8 ) Undetermined - not enough data

Maximum lung growth attained: ( 1 ) Yes ( 0 ) No

Plateau started: ( 2 ) No plateau ( 1 ) Yes ( 0 ) No

Decline started: ( 1 ) Yes ( 0 ) No

AGE AT each of the following periods (use '99' if N/A):

Maximum Lung Growth: \_\_\_\_ . \_\_\_\_

Start of Plateau: \_\_\_\_ . \_\_\_\_

Start of Decline: \_\_\_\_ . \_\_\_\_

### Pre-BD FEV1 Data and Percentiles: 1667

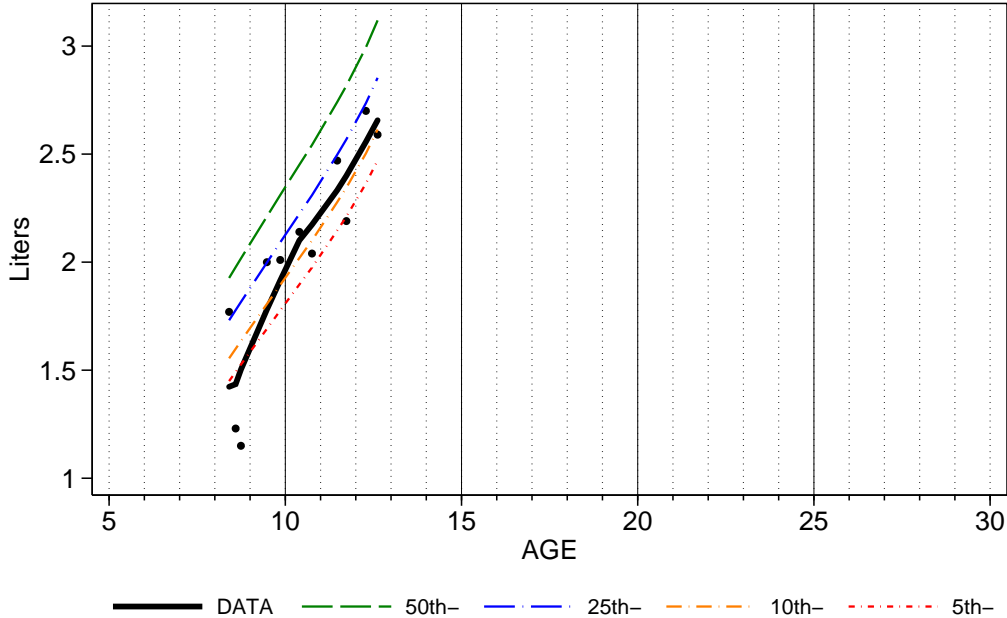

1667

**PATTERN OF GROWTH/DECLINE (Check One)**

- ( 1 ) Normal Growth
- ( 2 ) Normal Growth, Early Decline
- ( 3 ) Reduced Growth
- ( 4 ) Reduced Growth, Early Decline
- ( 9 ) Undetermined Pattern
- ( 8 ) Undetermined - not enough data

Maximum lung growth attained: ( 1 ) Yes ( 0 ) No

Plateau started: ( 2 ) No plateau ( 1 ) Yes ( 0 ) No

Decline started: ( 1 ) Yes ( 0 ) No

AGE AT each of the following periods (use '99' if N/A):

Maximum Lung Growth: \_\_\_\_ . \_\_\_\_

Start of Plateau: \_\_\_\_ . \_\_\_\_

Start of Decline: \_\_\_\_ . \_\_\_\_



### Pre-BD FEV1 Data and Percentiles: 1670

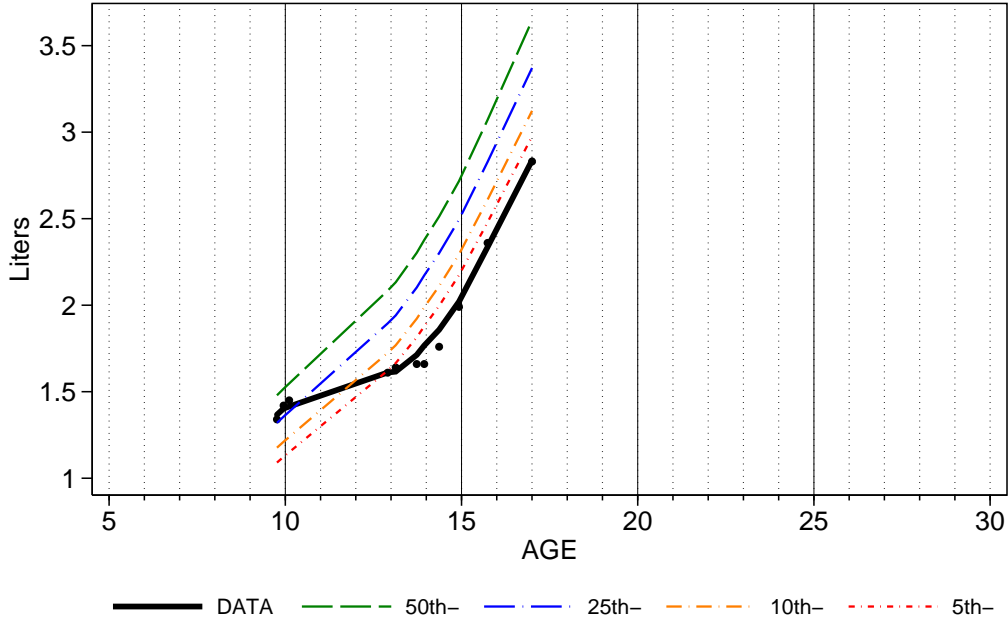

1670

**PATTERN OF GROWTH/DECLINE (Check One)**

- ( 1) Normal Growth
- ( 2) Normal Growth, Early Decline
- ( 3) Reduced Growth
- ( 4) Reduced Growth, Early Decline
- ( 9) Undetermined Pattern
- ( 8) Undetermined - not enough data

Maximum lung growth attained: ( 1) Yes ( 0) No

Plateau started: ( 2) No plateau ( 1) Yes ( 0) No

Decline started: ( 1) Yes ( 0) No

AGE AT each of the following periods (use '99' if N/A):

Maximum Lung Growth: \_\_\_\_ . \_\_\_\_

Start of Plateau: \_\_\_\_ . \_\_\_\_

Start of Decline: \_\_\_\_ . \_\_\_\_

### Pre-BD FEV1 Data and Percentiles: 1671

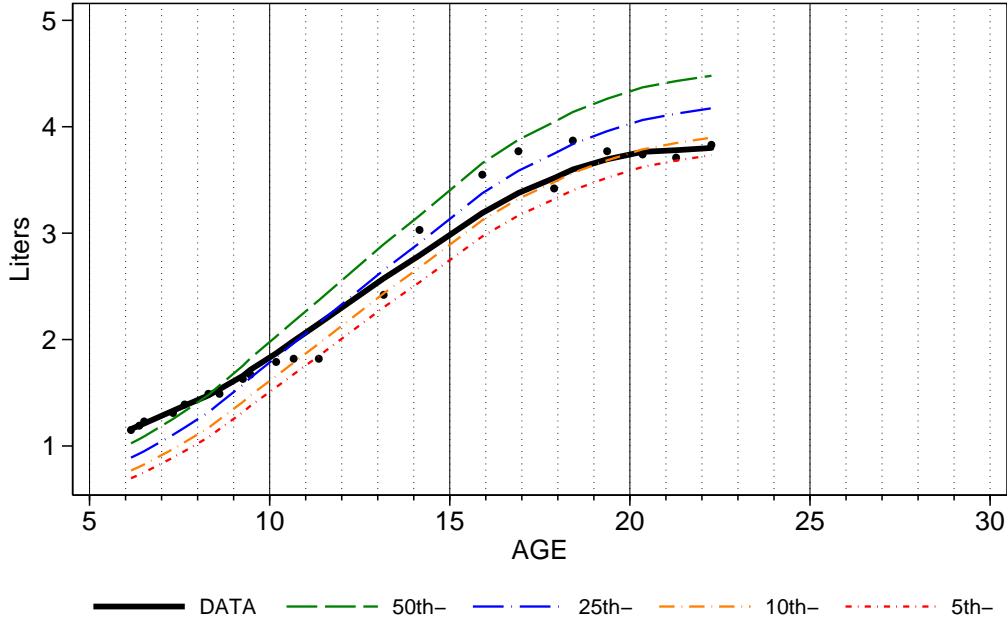

1671

**PATTERN OF GROWTH/DECLINE (Check One)**

- ( 1 ) Normal Growth
- ( 2 ) Normal Growth, Early Decline
- ( 3 ) Reduced Growth
- ( 4 ) Reduced Growth, Early Decline
- ( 9 ) Undetermined Pattern
- ( 8 ) Undetermined - not enough data

Maximum lung growth attained: ( 1 ) Yes ( 0 ) No

Plateau started: ( 2 ) No plateau ( 1 ) Yes ( 0 ) No

Decline started: ( 1 ) Yes ( 0 ) No

AGE AT each of the following periods (use '99' if N/A):

Maximum Lung Growth: \_\_\_\_ . \_\_\_\_

Start of Plateau: \_\_\_\_ . \_\_\_\_

Start of Decline: \_\_\_\_ . \_\_\_\_

### Pre-BD FEV1 Data and Percentiles: 1676

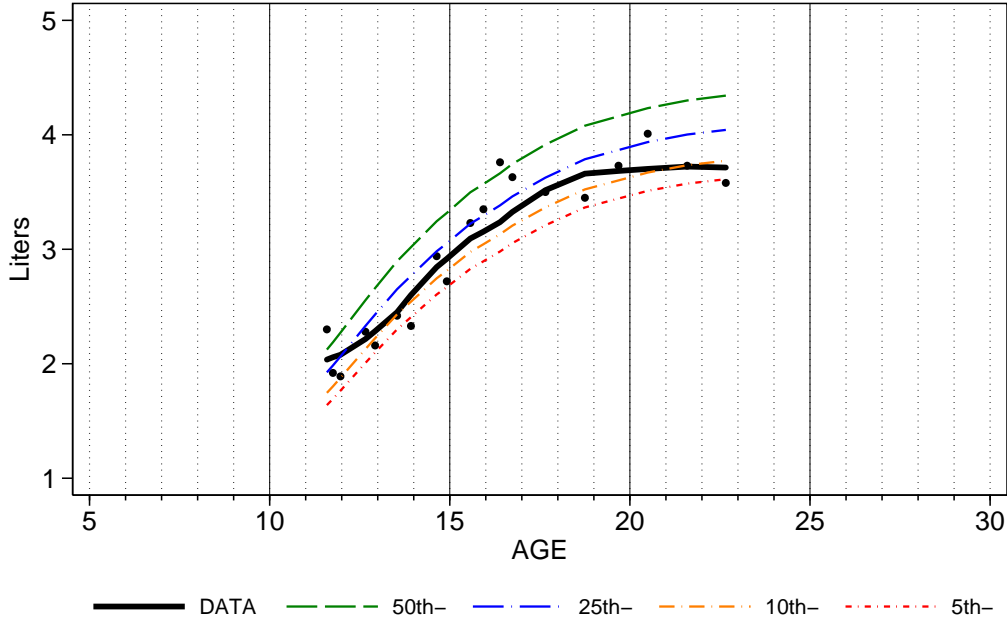

1676

**PATTERN OF GROWTH/DECLINE (Check One)**

- ( 1 ) Normal Growth
- ( 2 ) Normal Growth, Early Decline
- ( 3 ) Reduced Growth
- ( 4 ) Reduced Growth, Early Decline
- ( 9 ) Undetermined Pattern
- ( 8 ) Undetermined - not enough data

Maximum lung growth attained: ( 1 ) Yes ( 0 ) No

Plateau started: ( 2 ) No plateau ( 1 ) Yes ( 0 ) No

Decline started: ( 1 ) Yes ( 0 ) No

AGE AT each of the following periods (use '99' if N/A):

Maximum Lung Growth: \_\_\_\_ . \_\_\_\_

Start of Plateau: \_\_\_\_ . \_\_\_\_

Start of Decline: \_\_\_\_ . \_\_\_\_

### Pre-BD FEV1 Data and Percentiles: 1678

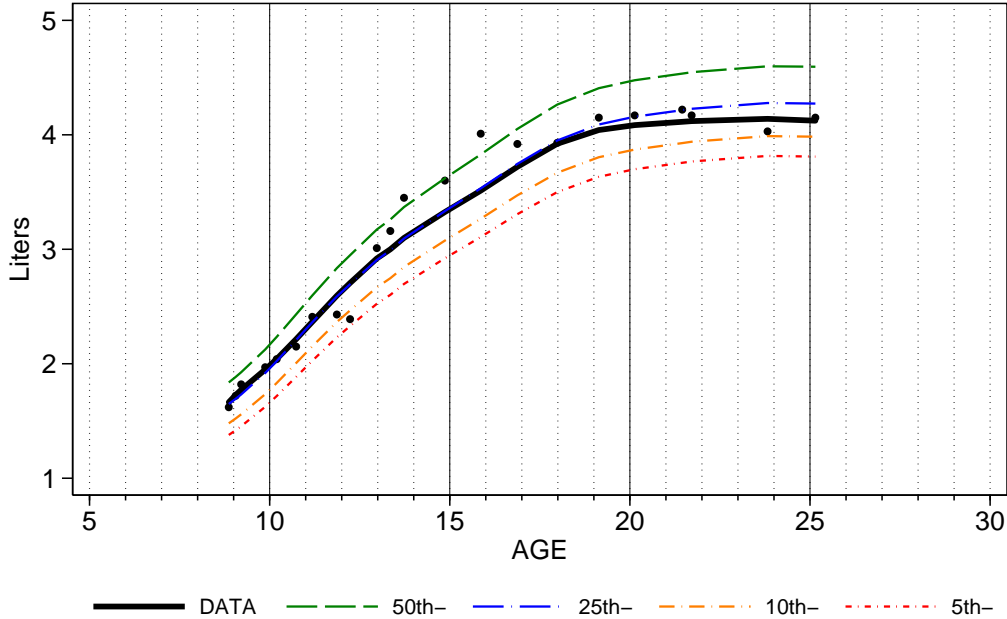

1678

**PATTERN OF GROWTH/DECLINE (Check One)**

- ( 1 ) Normal Growth
- ( 2 ) Normal Growth, Early Decline
- ( 3 ) Reduced Growth
- ( 4 ) Reduced Growth, Early Decline
- ( 9 ) Undetermined Pattern
- ( 8 ) Undetermined - not enough data

Maximum lung growth attained: ( 1 ) Yes ( 0 ) No

Plateau started: ( 2 ) No plateau ( 1 ) Yes ( 0 ) No

Decline started: ( 1 ) Yes ( 0 ) No

AGE AT each of the following periods (use '99' if N/A):

Maximum Lung Growth: \_\_\_\_ . \_\_\_\_

Start of Plateau: \_\_\_\_ . \_\_\_\_

Start of Decline: \_\_\_\_ . \_\_\_\_

### Pre-BD FEV1 Data and Percentiles: 1684

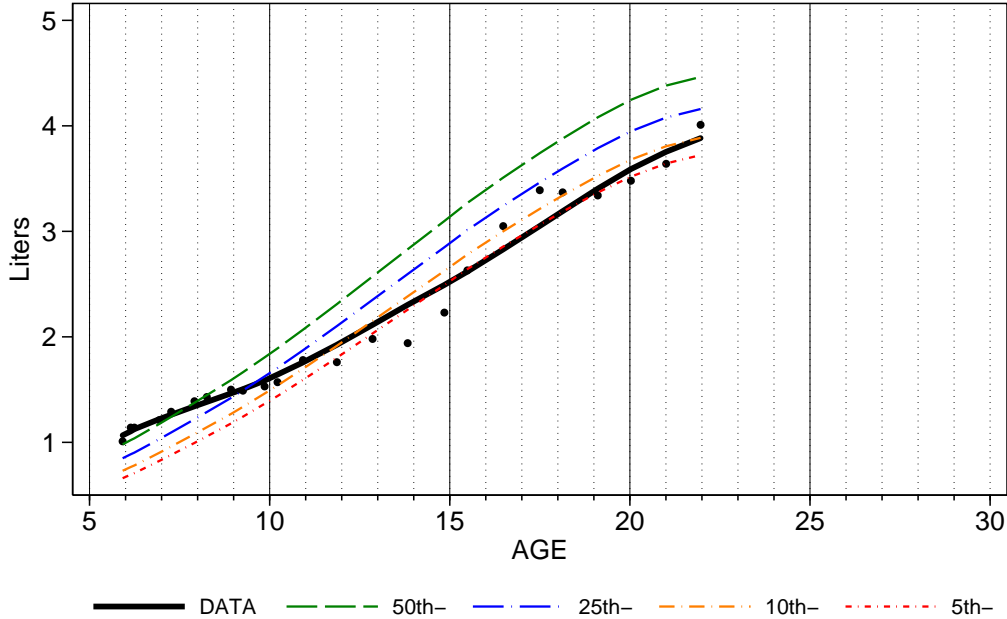

1684

**PATTERN OF GROWTH/DECLINE (Check One)**

- ( 1 ) Normal Growth
- ( 2 ) Normal Growth, Early Decline
- ( 3 ) Reduced Growth
- ( 4 ) Reduced Growth, Early Decline
- ( 9 ) Undetermined Pattern
- ( 8 ) Undetermined - not enough data

Maximum lung growth attained: ( 1 ) Yes ( 0 ) No

Plateau started: ( 2 ) No plateau ( 1 ) Yes ( 0 ) No

Decline started: ( 1 ) Yes ( 0 ) No

AGE AT each of the following periods (use '99' if N/A):

Maximum Lung Growth: \_\_\_\_ . \_\_\_\_

Start of Plateau: \_\_\_\_ . \_\_\_\_

Start of Decline: \_\_\_\_ . \_\_\_\_

### Pre-BD FEV1 Data and Percentiles: 1686

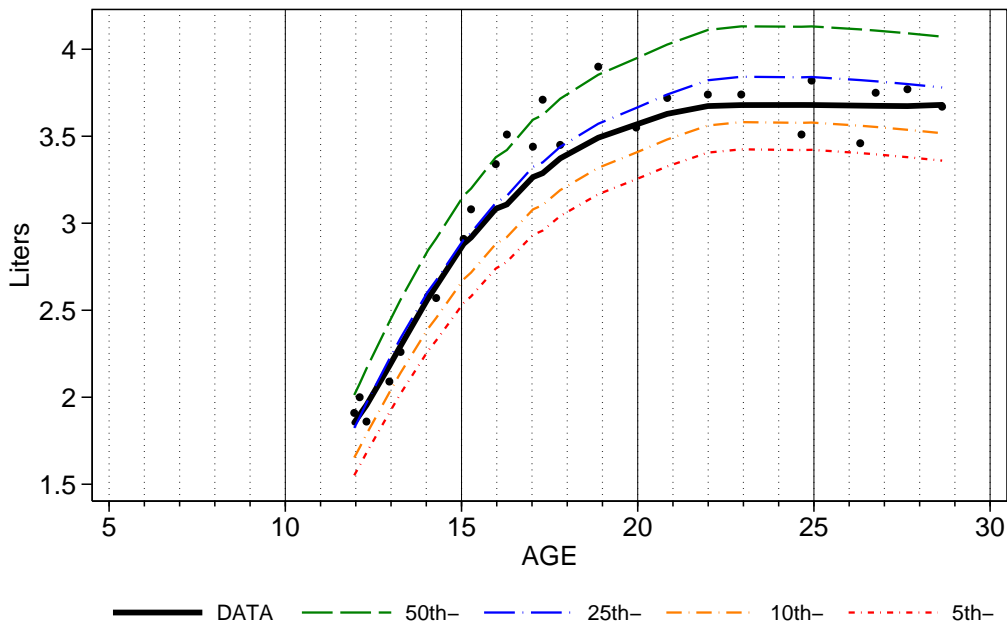

1686

**PATTERN OF GROWTH/DECLINE (Check One)**

- ( 1) Normal Growth
- ( 2) Normal Growth, Early Decline
- ( 3) Reduced Growth
- ( 4) Reduced Growth, Early Decline
- ( 9) Undetermined Pattern
- ( 8) Undetermined - not enough data

Maximum lung growth attained: ( 1) Yes ( 0) No

Plateau started: ( 2) No plateau ( 1) Yes ( 0) No

Decline started: ( 1) Yes ( 0) No

AGE AT each of the following periods (use '99' if N/A):

Maximum Lung Growth: \_\_\_\_ . \_\_\_\_

Start of Plateau: \_\_\_\_ . \_\_\_\_

Start of Decline: \_\_\_\_ . \_\_\_\_

### Pre-BD FEV1 Data and Percentiles: 1687

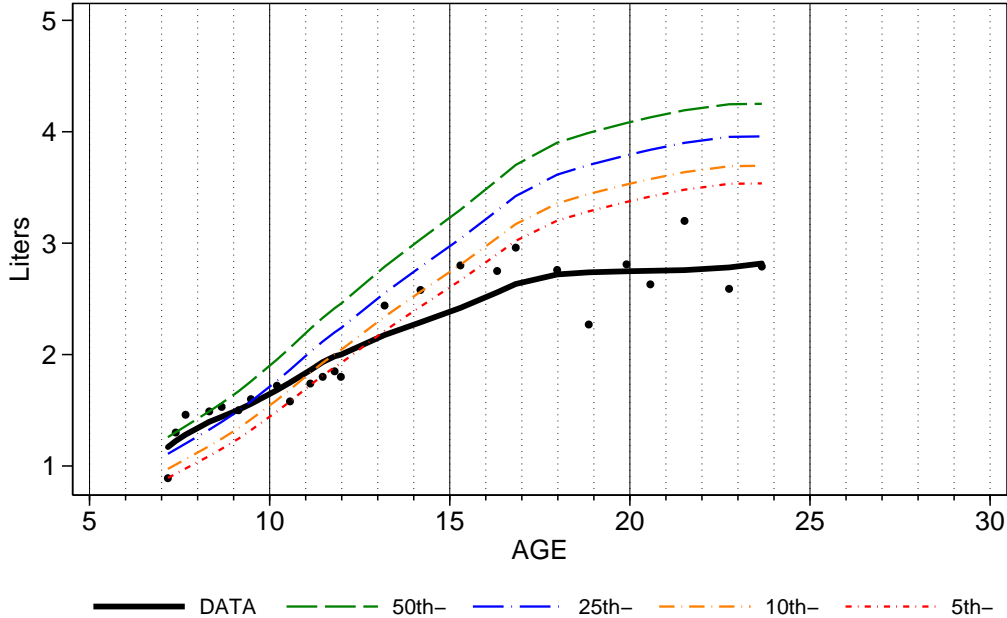

1687

**PATTERN OF GROWTH/DECLINE (Check One)**

- ( 1) Normal Growth
- ( 2) Normal Growth, Early Decline
- ( 3) Reduced Growth
- ( 4) Reduced Growth, Early Decline
- ( 9) Undetermined Pattern
- ( 8) Undetermined - not enough data

Maximum lung growth attained: ( 1) Yes ( 0) No

Plateau started: ( 2) No plateau ( 1) Yes ( 0) No

Decline started: ( 1) Yes ( 0) No

AGE AT each of the following periods (use '99' if N/A):

Maximum Lung Growth: \_\_\_\_ . \_\_\_\_

Start of Plateau: \_\_\_\_ . \_\_\_\_

Start of Decline: \_\_\_\_ . \_\_\_\_

### Pre-BD FEV1 Data and Percentiles: 1689

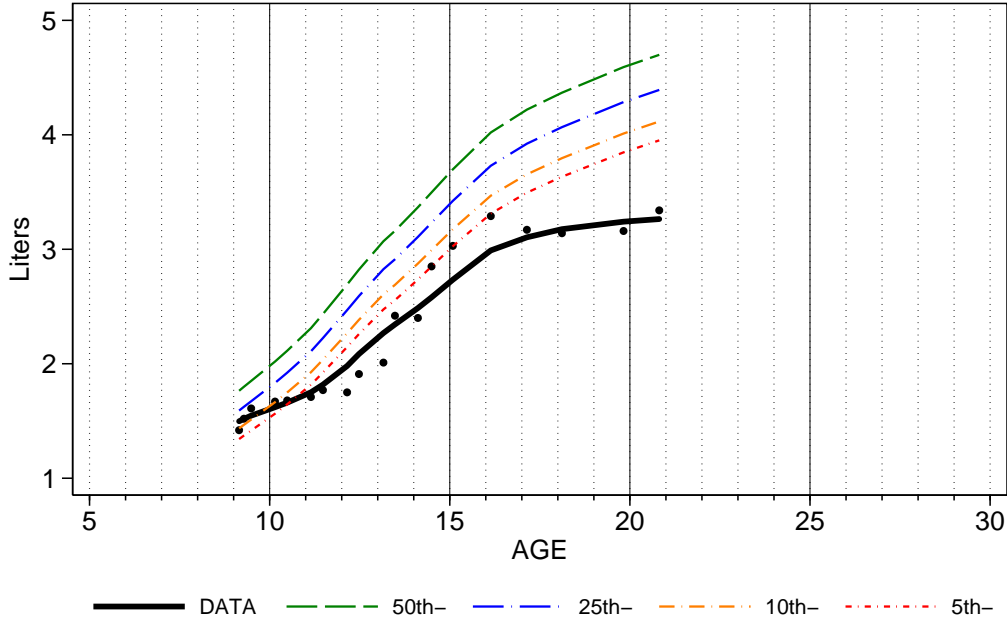

1689

**PATTERN OF GROWTH/DECLINE (Check One)**

- ( 1 ) Normal Growth
- ( 2 ) Normal Growth, Early Decline
- ( 3 ) Reduced Growth
- ( 4 ) Reduced Growth, Early Decline
- ( 9 ) Undetermined Pattern
- ( 8 ) Undetermined - not enough data

Maximum lung growth attained: ( 1 ) Yes ( 0 ) No

Plateau started: ( 2 ) No plateau ( 1 ) Yes ( 0 ) No

Decline started: ( 1 ) Yes ( 0 ) No

AGE AT each of the following periods (use '99' if N/A):

Maximum Lung Growth: \_\_\_\_ . \_\_\_\_

Start of Plateau: \_\_\_\_ . \_\_\_\_

Start of Decline: \_\_\_\_ . \_\_\_\_



### Pre-BD FEV1 Data and Percentiles: 1693

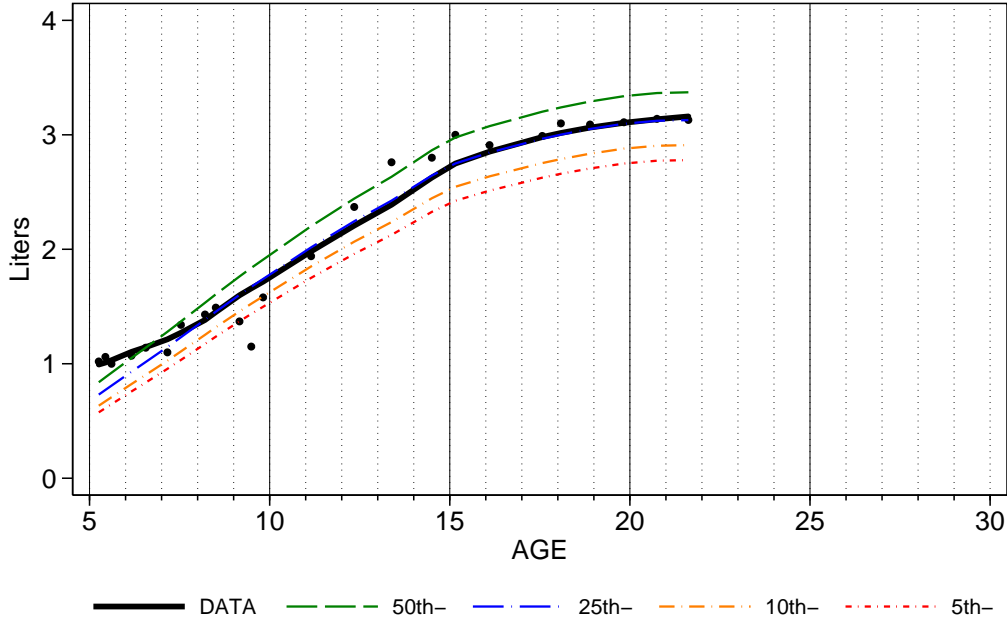

1693

**PATTERN OF GROWTH/DECLINE (Check One)**

- ( 1 ) Normal Growth
- ( 2 ) Normal Growth, Early Decline
- ( 3 ) Reduced Growth
- ( 4 ) Reduced Growth, Early Decline
- ( 9 ) Undetermined Pattern
- ( 8 ) Undetermined - not enough data

Maximum lung growth attained: ( 1 ) Yes ( 0 ) No

Plateau started: ( 2 ) No plateau ( 1 ) Yes ( 0 ) No

Decline started: ( 1 ) Yes ( 0 ) No

AGE AT each of the following periods (use '99' if N/A):

Maximum Lung Growth: \_\_\_\_ . \_\_\_\_

Start of Plateau: \_\_\_\_ . \_\_\_\_

Start of Decline: \_\_\_\_ . \_\_\_\_

### Pre-BD FEV1 Data and Percentiles: 1694

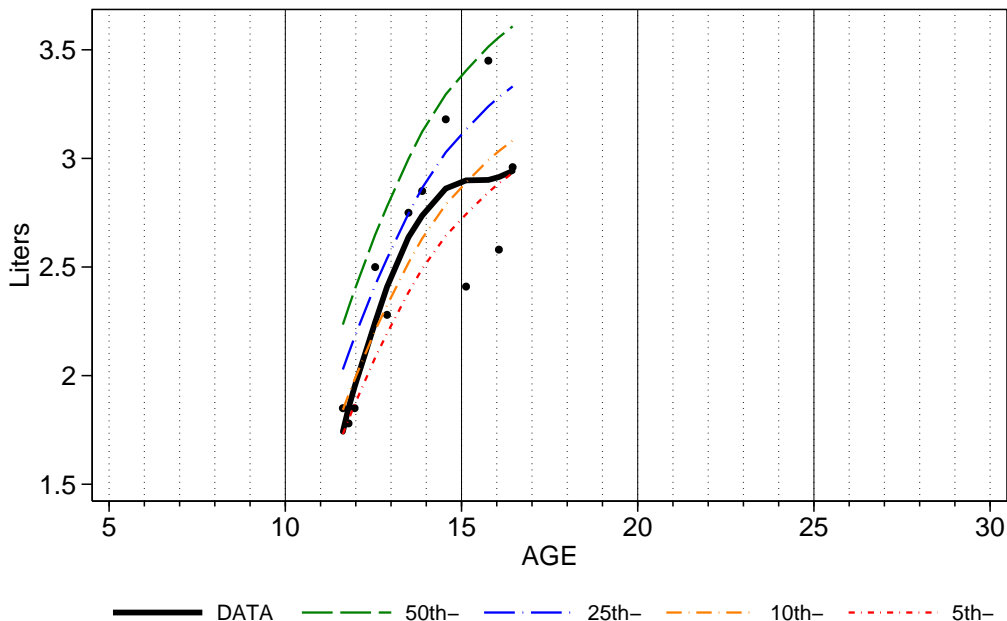

1694

**PATTERN OF GROWTH/DECLINE (Check One)**

- ( 1) Normal Growth
- ( 2) Normal Growth, Early Decline
- ( 3) Reduced Growth
- ( 4) Reduced Growth, Early Decline
- ( 9) Undetermined Pattern
- ( 8) Undetermined - not enough data

Maximum lung growth attained: ( 1) Yes ( 0) No

Plateau started: ( 2) No plateau ( 1) Yes ( 0) No

Decline started: ( 1) Yes ( 0) No

AGE AT each of the following periods (use '99' if N/A):

Maximum Lung Growth: \_\_\_\_ . \_\_\_\_

Start of Plateau: \_\_\_\_ . \_\_\_\_

Start of Decline: \_\_\_\_ . \_\_\_\_

### Pre-BD FEV1 Data and Percentiles: 1695

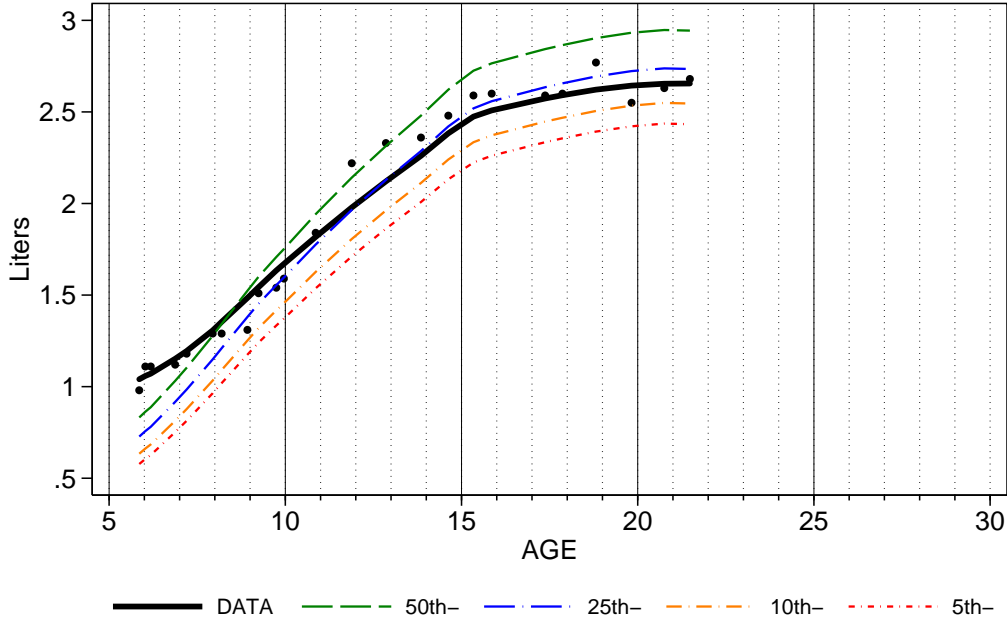

1695

**PATTERN OF GROWTH/DECLINE (Check One)**

- ( 1) Normal Growth
- ( 2) Normal Growth, Early Decline
- ( 3) Reduced Growth
- ( 4) Reduced Growth, Early Decline
- ( 9) Undetermined Pattern
- ( 8) Undetermined - not enough data

Maximum lung growth attained: ( 1) Yes ( 0) No

Plateau started: ( 2) No plateau ( 1) Yes ( 0) No

Decline started: ( 1) Yes ( 0) No

AGE AT each of the following periods (use '99' if N/A):

Maximum Lung Growth: \_\_\_\_ . \_\_\_\_

Start of Plateau: \_\_\_\_ . \_\_\_\_

Start of Decline: \_\_\_\_ . \_\_\_\_

### Pre-BD FEV1 Data and Percentiles: 1704

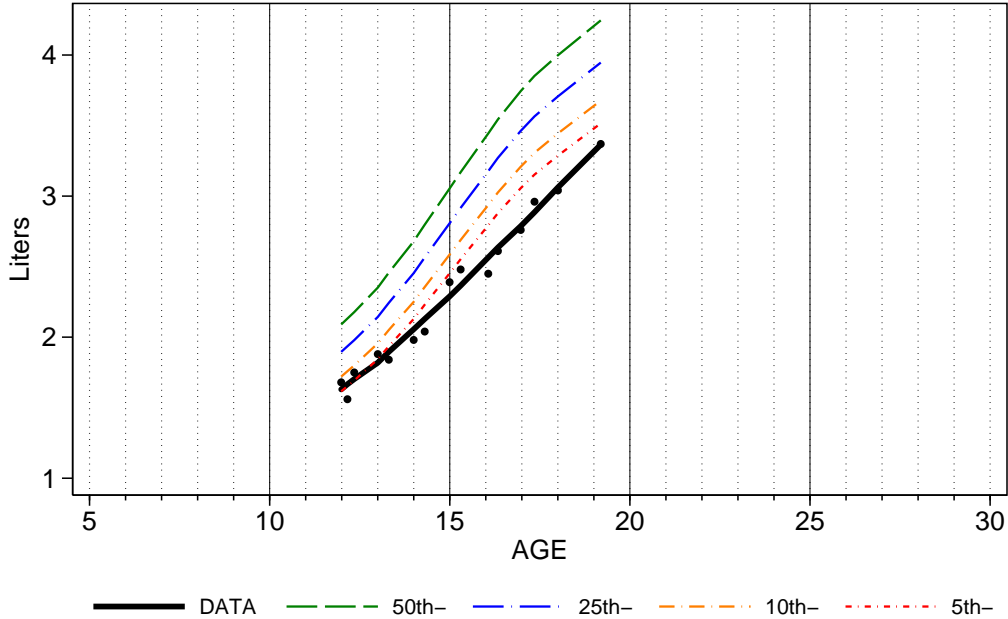

1704

**PATTERN OF GROWTH/DECLINE (Check One)**

- ( 1) Normal Growth
- ( 2) Normal Growth, Early Decline
- ( 3) Reduced Growth
- ( 4) Reduced Growth, Early Decline
- ( 9) Undetermined Pattern
- ( 8) Undetermined - not enough data

Maximum lung growth attained: ( 1) Yes ( 0) No

Plateau started: ( 2) No plateau ( 1) Yes ( 0) No

Decline started: ( 1) Yes ( 0) No

AGE AT each of the following periods (use '99' if N/A):

Maximum Lung Growth: \_\_\_\_ . \_\_\_\_

Start of Plateau: \_\_\_\_ . \_\_\_\_

Start of Decline: \_\_\_\_ . \_\_\_\_

### Pre-BD FEV1 Data and Percentiles: 1723

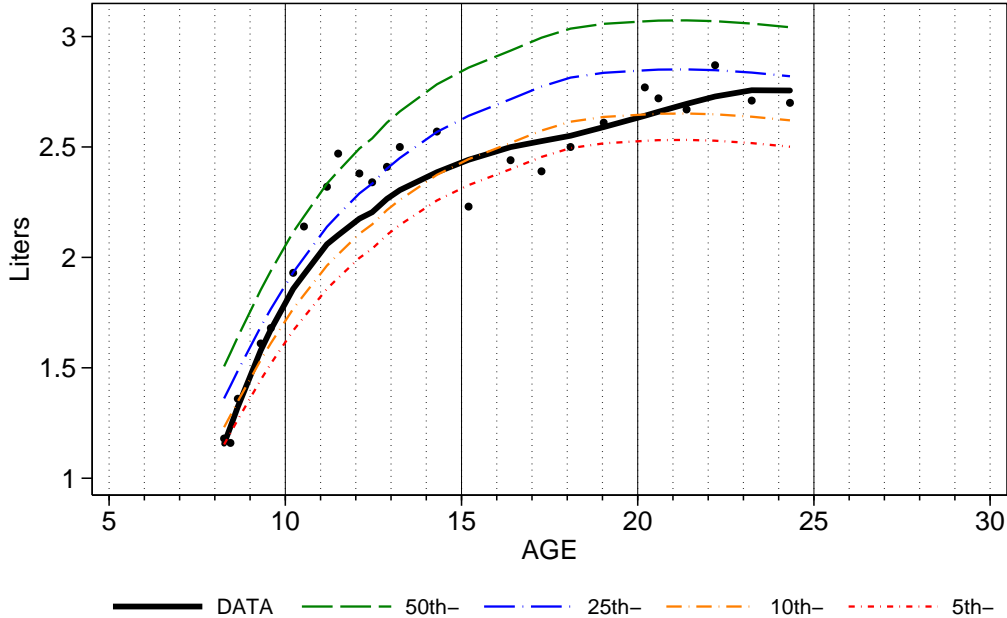

1723

**PATTERN OF GROWTH/DECLINE (Check One)**

- ( 1) Normal Growth
- ( 2) Normal Growth, Early Decline
- ( 3) Reduced Growth
- ( 4) Reduced Growth, Early Decline
- ( 9) Undetermined Pattern
- ( 8) Undetermined - not enough data

Maximum lung growth attained: ( 1) Yes ( 0) No

Plateau started: ( 2) No plateau ( 1) Yes ( 0) No

Decline started: ( 1) Yes ( 0) No

AGE AT each of the following periods (use '99' if N/A):

Maximum Lung Growth: \_\_\_\_ . \_\_\_\_

Start of Plateau: \_\_\_\_ . \_\_\_\_

Start of Decline: \_\_\_\_ . \_\_\_\_

### Pre-BD FEV1 Data and Percentiles: 1724

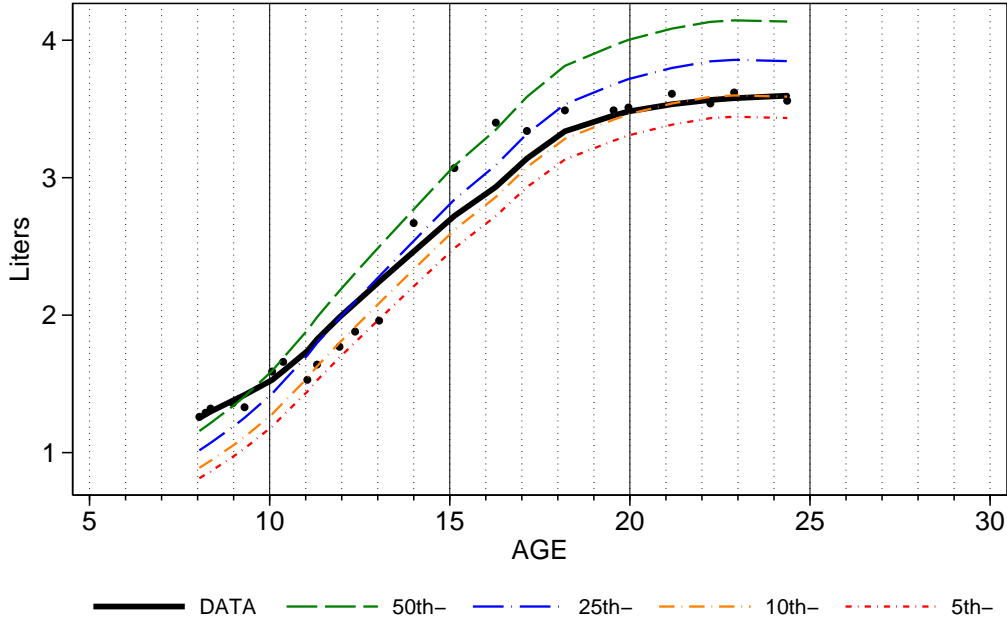

1724

**PATTERN OF GROWTH/DECLINE (Check One)**

- ( 1 ) Normal Growth
- ( 2 ) Normal Growth, Early Decline
- ( 3 ) Reduced Growth
- ( 4 ) Reduced Growth, Early Decline
- ( 9 ) Undetermined Pattern
- ( 8 ) Undetermined - not enough data

Maximum lung growth attained: ( 1 ) Yes ( 0 ) No

Plateau started: ( 2 ) No plateau ( 1 ) Yes ( 0 ) No

Decline started: ( 1 ) Yes ( 0 ) No

AGE AT each of the following periods (use '99' if N/A):

Maximum Lung Growth: \_\_\_\_ . \_\_\_\_

Start of Plateau: \_\_\_\_ . \_\_\_\_

Start of Decline: \_\_\_\_ . \_\_\_\_

### Pre-BD FEV1 Data and Percentiles: 1729

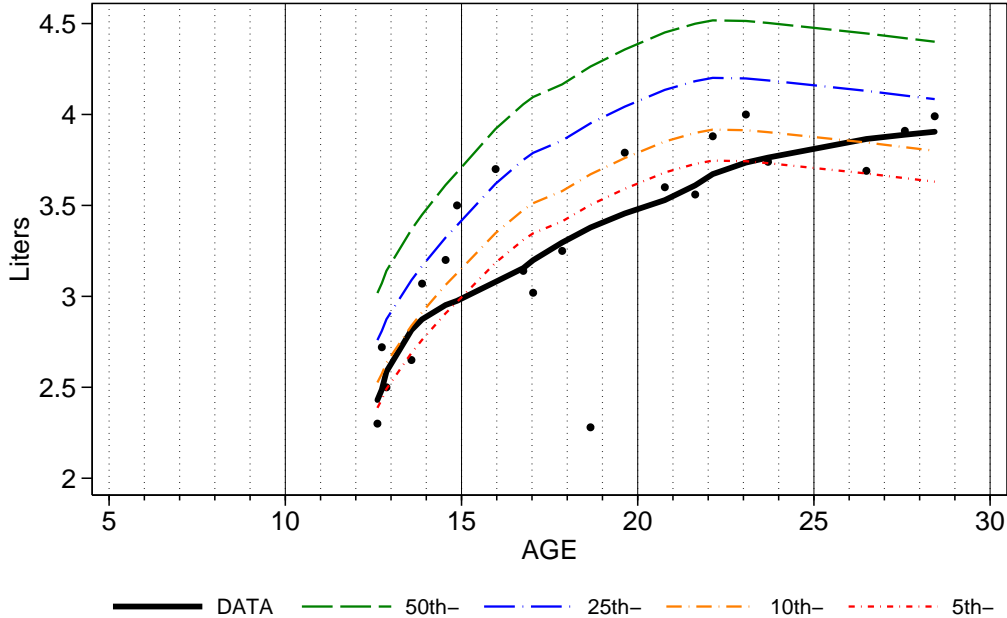

1729

**PATTERN OF GROWTH/DECLINE (Check One)**

- ( 1 ) Normal Growth
- ( 2 ) Normal Growth, Early Decline
- ( 3 ) Reduced Growth
- ( 4 ) Reduced Growth, Early Decline
- ( 9 ) Undetermined Pattern
- ( 8 ) Undetermined - not enough data

Maximum lung growth attained: ( 1 ) Yes ( 0 ) No

Plateau started: ( 2 ) No plateau ( 1 ) Yes ( 0 ) No

Decline started: ( 1 ) Yes ( 0 ) No

AGE AT each of the following periods (use '99' if N/A):

Maximum Lung Growth: \_\_\_\_ . \_\_\_\_

Start of Plateau: \_\_\_\_ . \_\_\_\_

Start of Decline: \_\_\_\_ . \_\_\_\_

### Pre-BD FEV1 Data and Percentiles: 1734

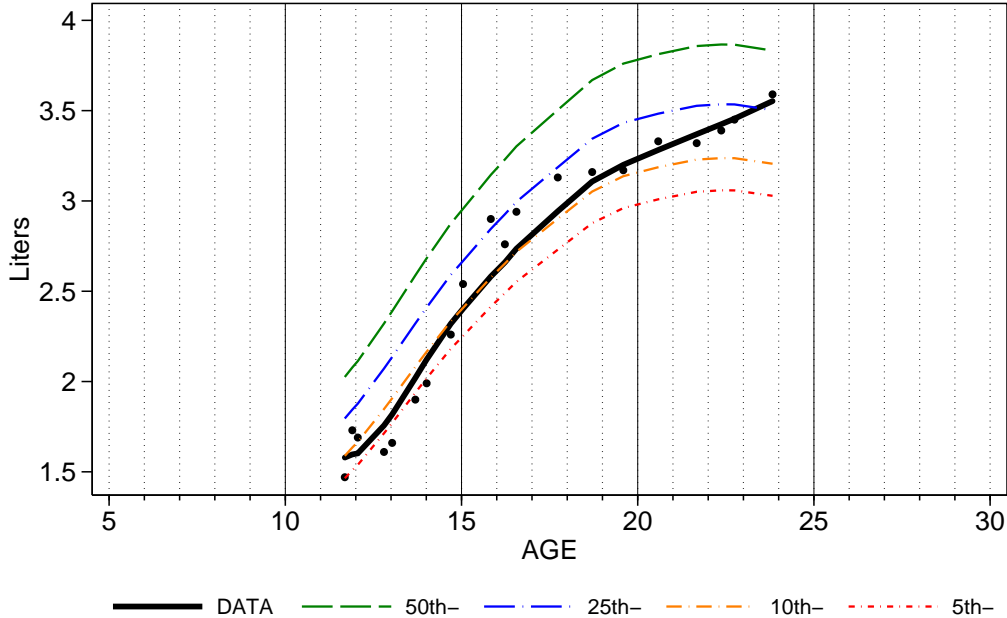

1734

**PATTERN OF GROWTH/DECLINE (Check One)**

- ( 1) Normal Growth
- ( 2) Normal Growth, Early Decline
- ( 3) Reduced Growth
- ( 4) Reduced Growth, Early Decline
- ( 9) Undetermined Pattern
- ( 8) Undetermined - not enough data

Maximum lung growth attained: ( 1) Yes ( 0) No

Plateau started: ( 2) No plateau ( 1) Yes ( 0) No

Decline started: ( 1) Yes ( 0) No

AGE AT each of the following periods (use '99' if N/A):

Maximum Lung Growth: \_\_\_\_ . \_\_\_\_

Start of Plateau: \_\_\_\_ . \_\_\_\_

Start of Decline: \_\_\_\_ . \_\_\_\_



### Pre-BD FEV1 Data and Percentiles: 1735

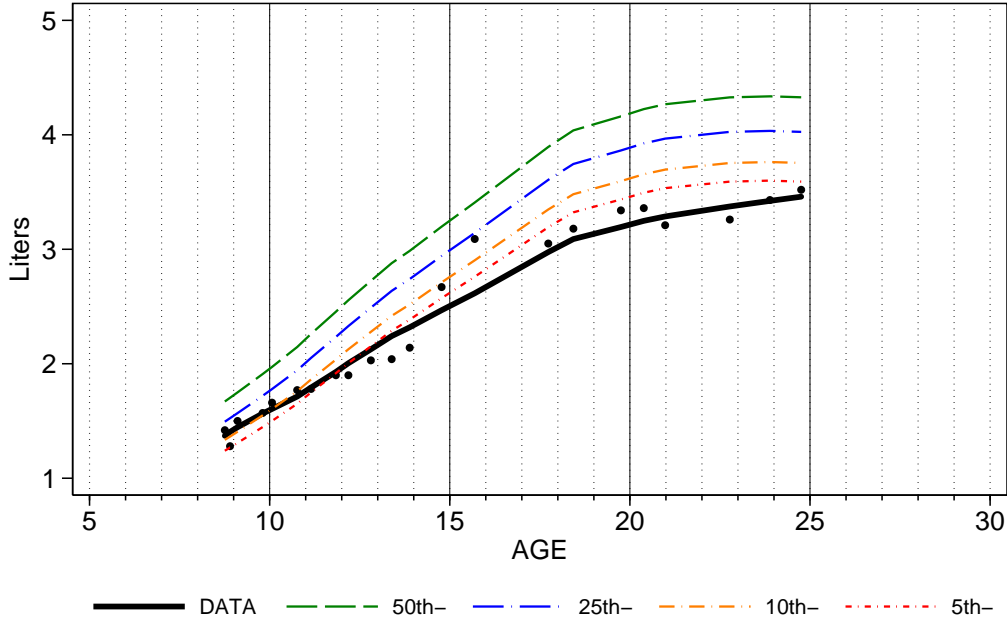

1735

**PATTERN OF GROWTH/DECLINE (Check One)**

- ( 1 ) Normal Growth
- ( 2 ) Normal Growth, Early Decline
- ( 3 ) Reduced Growth
- ( 4 ) Reduced Growth, Early Decline
- ( 9 ) Undetermined Pattern
- ( 8 ) Undetermined - not enough data

Maximum lung growth attained: ( 1 ) Yes ( 0 ) No

Plateau started: ( 2 ) No plateau ( 1 ) Yes ( 0 ) No

Decline started: ( 1 ) Yes ( 0 ) No

AGE AT each of the following periods (use '99' if N/A):

Maximum Lung Growth: \_\_\_\_ . \_\_\_\_

Start of Plateau: \_\_\_\_ . \_\_\_\_

Start of Decline: \_\_\_\_ . \_\_\_\_

### Pre-BD FEV1 Data and Percentiles: 1737

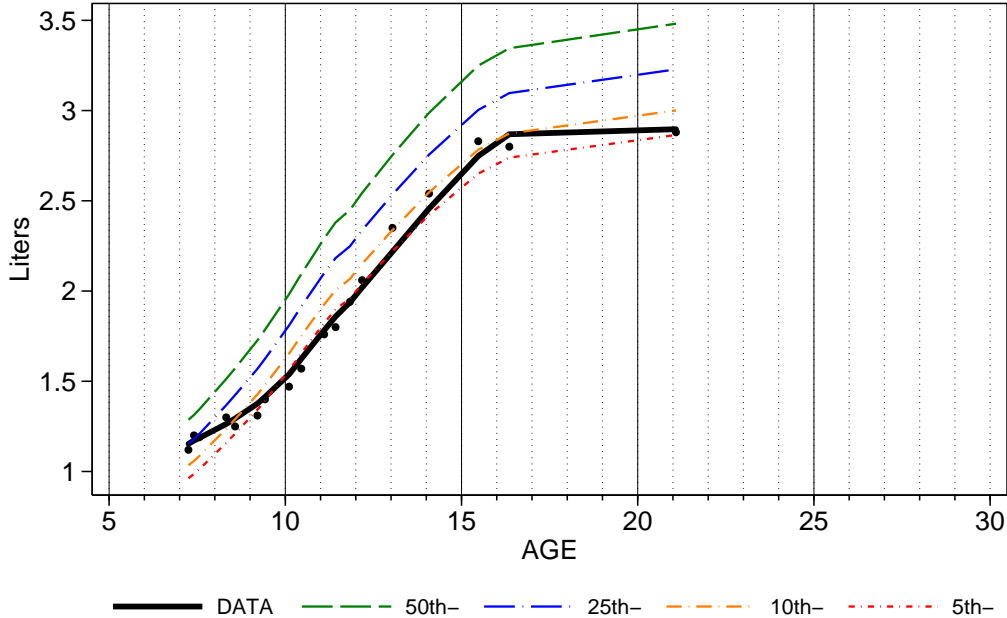

1737

**PATTERN OF GROWTH/DECLINE (Check One)**

- ( 1 ) Normal Growth
- ( 2 ) Normal Growth, Early Decline
- ( 3 ) Reduced Growth
- ( 4 ) Reduced Growth, Early Decline
- ( 9 ) Undetermined Pattern
- ( 8 ) Undetermined - not enough data

Maximum lung growth attained: ( 1 ) Yes ( 0 ) No

Plateau started: ( 2 ) No plateau ( 1 ) Yes ( 0 ) No

Decline started: ( 1 ) Yes ( 0 ) No

AGE AT each of the following periods (use '99' if N/A):

Maximum Lung Growth: \_\_\_\_ . \_\_\_\_

Start of Plateau: \_\_\_\_ . \_\_\_\_

Start of Decline: \_\_\_\_ . \_\_\_\_

### Pre-BD FEV1 Data and Percentiles: 1746

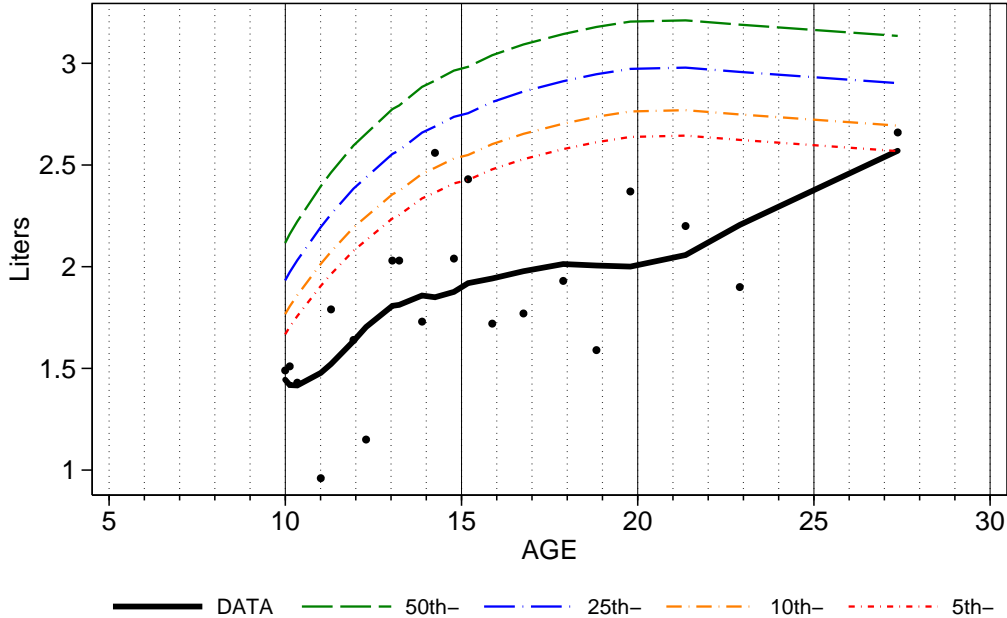

1746

**PATTERN OF GROWTH/DECLINE (Check One)**

- ( 1) Normal Growth
- ( 2) Normal Growth, Early Decline
- ( 3) Reduced Growth
- ( 4) Reduced Growth, Early Decline
- ( 9) Undetermined Pattern
- ( 8) Undetermined - not enough data

Maximum lung growth attained: ( 1) Yes ( 0) No

Plateau started: ( 2) No plateau ( 1) Yes ( 0) No

Decline started: ( 1) Yes ( 0) No

AGE AT each of the following periods (use '99' if N/A):

Maximum Lung Growth: \_\_\_\_ . \_\_\_\_

Start of Plateau: \_\_\_\_ . \_\_\_\_

Start of Decline: \_\_\_\_ . \_\_\_\_

### Pre-BD FEV1 Data and Percentiles: 1751

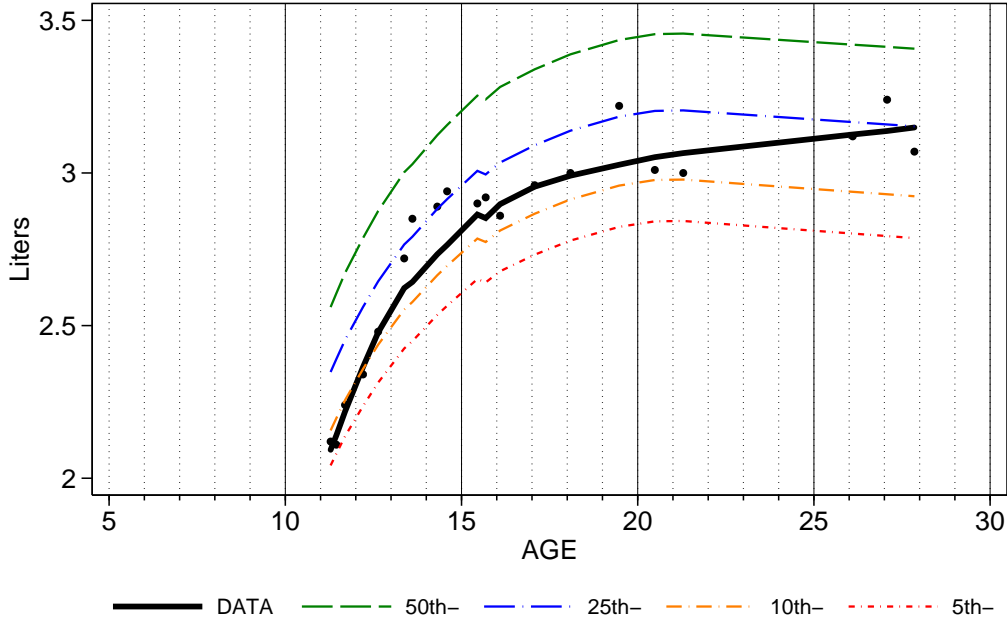

1751

**PATTERN OF GROWTH/DECLINE (Check One)**

- ( 1 ) Normal Growth
- ( 2 ) Normal Growth, Early Decline
- ( 3 ) Reduced Growth
- ( 4 ) Reduced Growth, Early Decline
- ( 9 ) Undetermined Pattern
- ( 8 ) Undetermined - not enough data

Maximum lung growth attained: ( 1 ) Yes ( 0 ) No

Plateau started: ( 2 ) No plateau ( 1 ) Yes ( 0 ) No

Decline started: ( 1 ) Yes ( 0 ) No

AGE AT each of the following periods (use '99' if N/A):

Maximum Lung Growth: \_\_\_\_ . \_\_\_\_

Start of Plateau: \_\_\_\_ . \_\_\_\_

Start of Decline: \_\_\_\_ . \_\_\_\_

### Pre-BD FEV1 Data and Percentiles: 1752

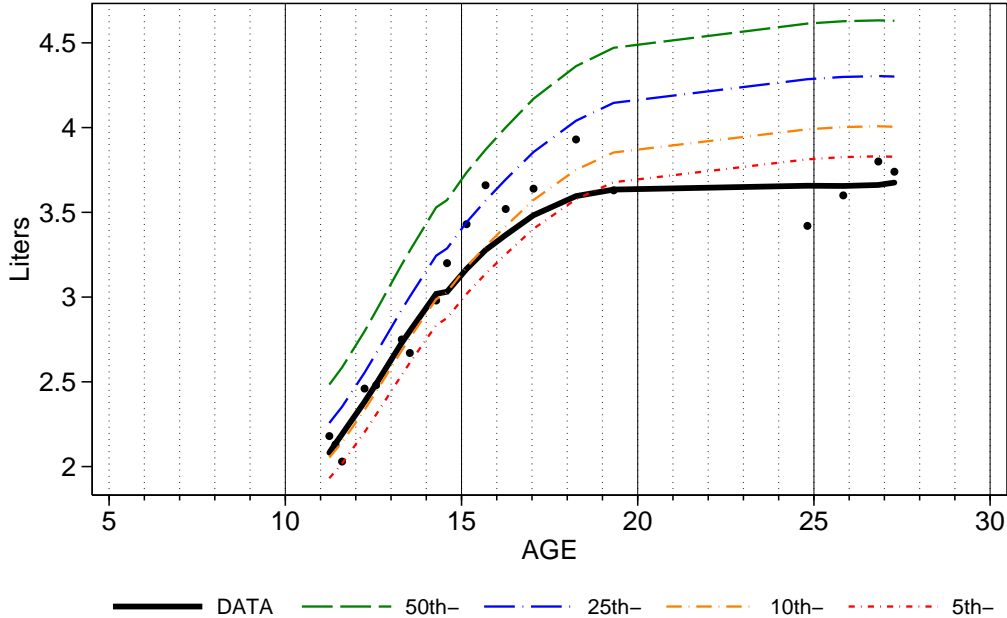

1752

**PATTERN OF GROWTH/DECLINE (Check One)**

- ( 1) Normal Growth
- ( 2) Normal Growth, Early Decline
- ( 3) Reduced Growth
- ( 4) Reduced Growth, Early Decline
- ( 9) Undetermined Pattern
- ( 8) Undetermined - not enough data

Maximum lung growth attained: ( 1) Yes ( 0) No

Plateau started: ( 2) No plateau ( 1) Yes ( 0) No

Decline started: ( 1) Yes ( 0) No

AGE AT each of the following periods (use '99' if N/A):

Maximum Lung Growth: \_\_\_\_ . \_\_\_\_

Start of Plateau: \_\_\_\_ . \_\_\_\_

Start of Decline: \_\_\_\_ . \_\_\_\_

### Pre-BD FEV1 Data and Percentiles: 1755

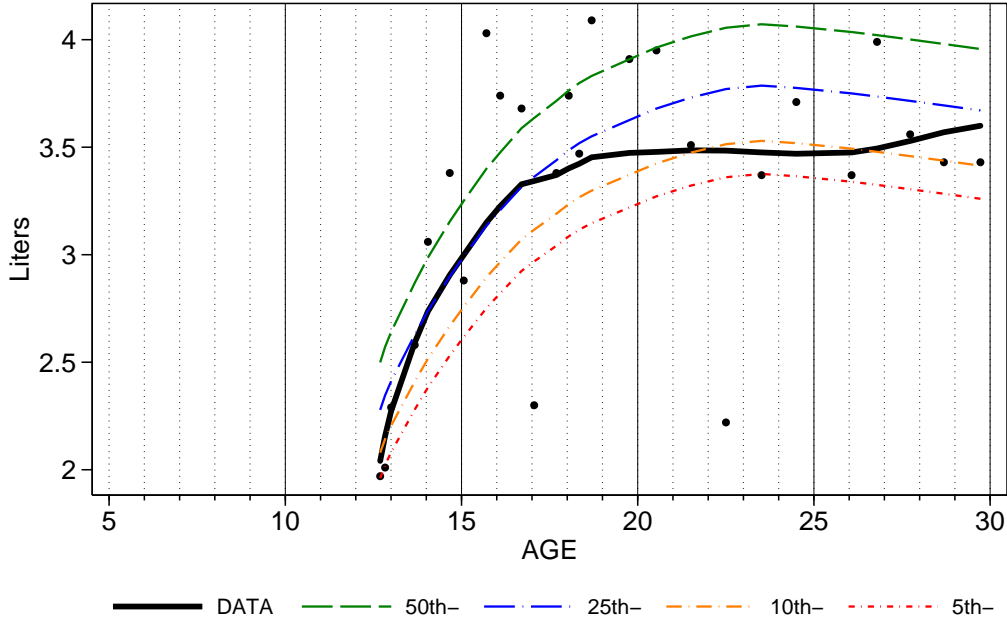

1755

**PATTERN OF GROWTH/DECLINE (Check One)**

- ( 1) Normal Growth
- ( 2) Normal Growth, Early Decline
- ( 3) Reduced Growth
- ( 4) Reduced Growth, Early Decline
- ( 9) Undetermined Pattern
- ( 8) Undetermined - not enough data

Maximum lung growth attained: ( 1) Yes ( 0) No

Plateau started: ( 2) No plateau ( 1) Yes ( 0) No

Decline started: ( 1) Yes ( 0) No

AGE AT each of the following periods (use '99' if N/A):

Maximum Lung Growth: \_\_\_\_ . \_\_\_\_

Start of Plateau: \_\_\_\_ . \_\_\_\_

Start of Decline: \_\_\_\_ . \_\_\_\_

### Pre-BD FEV1 Data and Percentiles: 1759

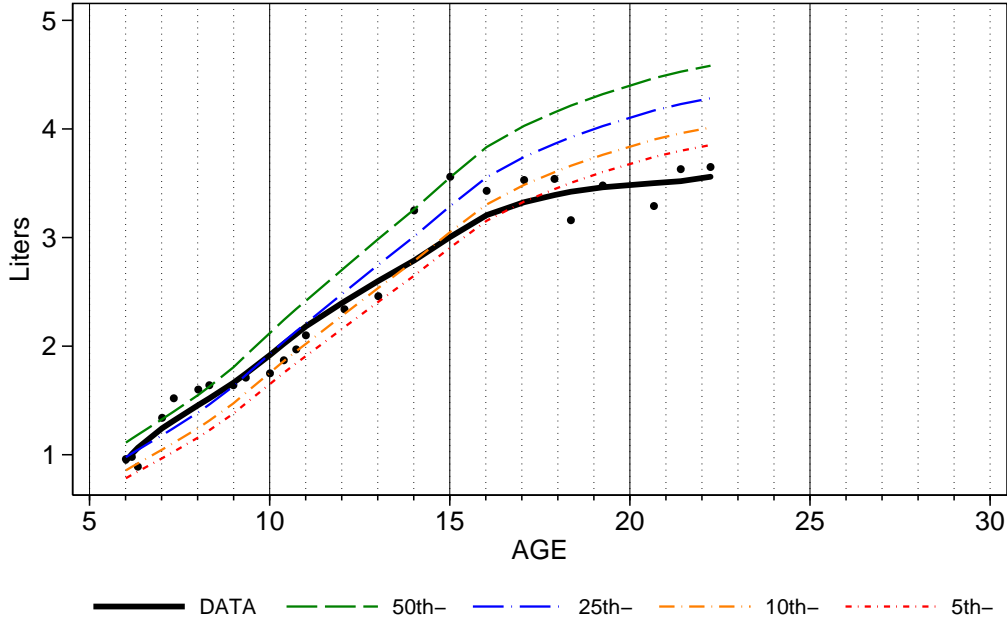

1759

**PATTERN OF GROWTH/DECLINE (Check One)**

- ( 1) Normal Growth
- ( 2) Normal Growth, Early Decline
- ( 3) Reduced Growth
- ( 4) Reduced Growth, Early Decline
- ( 9) Undetermined Pattern
- ( 8) Undetermined - not enough data

Maximum lung growth attained: ( 1) Yes ( 0) No

Plateau started: ( 2) No plateau ( 1) Yes ( 0) No

Decline started: ( 1) Yes ( 0) No

AGE AT each of the following periods (use '99' if N/A):

Maximum Lung Growth: \_\_\_\_ . \_\_\_\_

Start of Plateau: \_\_\_\_ . \_\_\_\_

Start of Decline: \_\_\_\_ . \_\_\_\_

### Pre-BD FEV1 Data and Percentiles: 1765

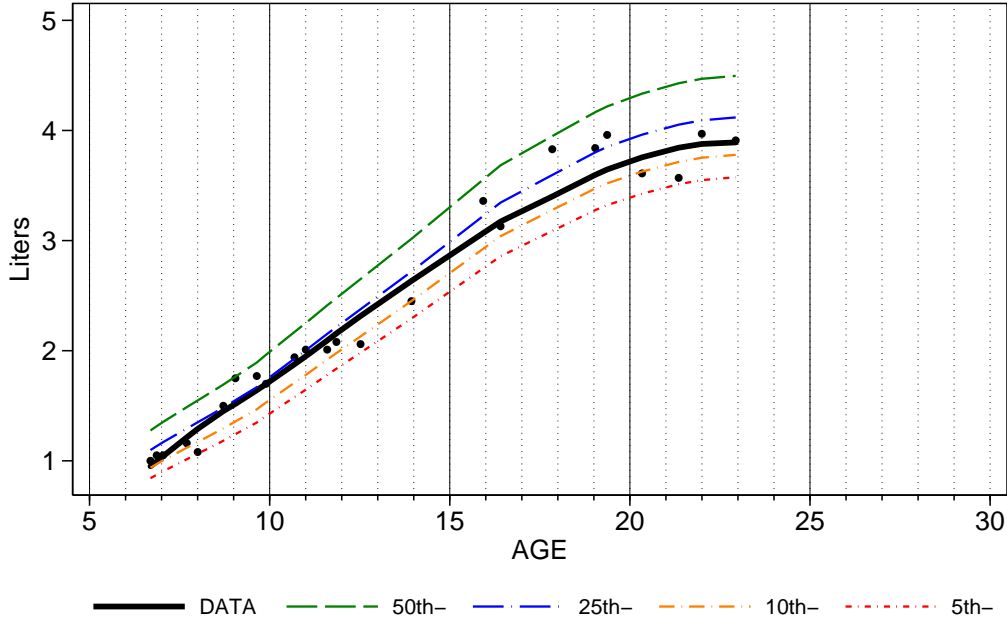

1765

**PATTERN OF GROWTH/DECLINE (Check One)**

- ( 1) Normal Growth
- ( 2) Normal Growth, Early Decline
- ( 3) Reduced Growth
- ( 4) Reduced Growth, Early Decline
- ( 9) Undetermined Pattern
- ( 8) Undetermined - not enough data

Maximum lung growth attained: ( 1) Yes ( 0) No

Plateau started: ( 2) No plateau ( 1) Yes ( 0) No

Decline started: ( 1) Yes ( 0) No

AGE AT each of the following periods (use '99' if N/A):

Maximum Lung Growth: \_\_\_\_ . \_\_\_\_

Start of Plateau: \_\_\_\_ . \_\_\_\_

Start of Decline: \_\_\_\_ . \_\_\_\_



### Pre-BD FEV1 Data and Percentiles: 1770

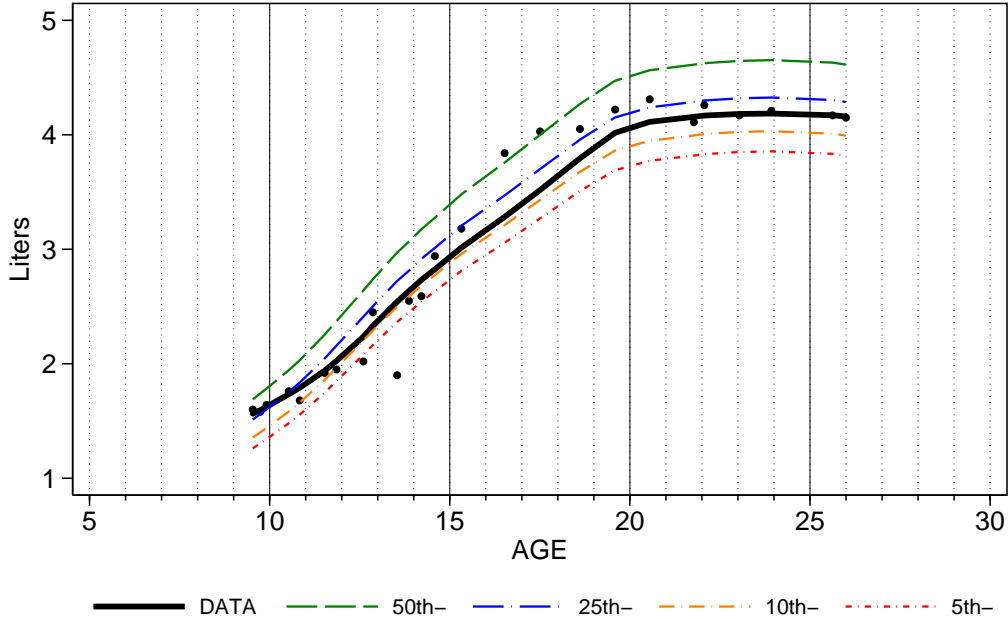

1770

**PATTERN OF GROWTH/DECLINE (Check One)**

- ( 1) Normal Growth
- ( 2) Normal Growth, Early Decline
- ( 3) Reduced Growth
- ( 4) Reduced Growth, Early Decline
- ( 9) Undetermined Pattern
- ( 8) Undetermined - not enough data

Maximum lung growth attained: ( 1) Yes ( 0) No

Plateau started: ( 2) No plateau ( 1) Yes ( 0) No

Decline started: ( 1) Yes ( 0) No

AGE AT each of the following periods (use '99' if N/A):

Maximum Lung Growth: \_\_\_\_ . \_\_\_\_

Start of Plateau: \_\_\_\_ . \_\_\_\_

Start of Decline: \_\_\_\_ . \_\_\_\_

### Pre-BD FEV1 Data and Percentiles: 1771

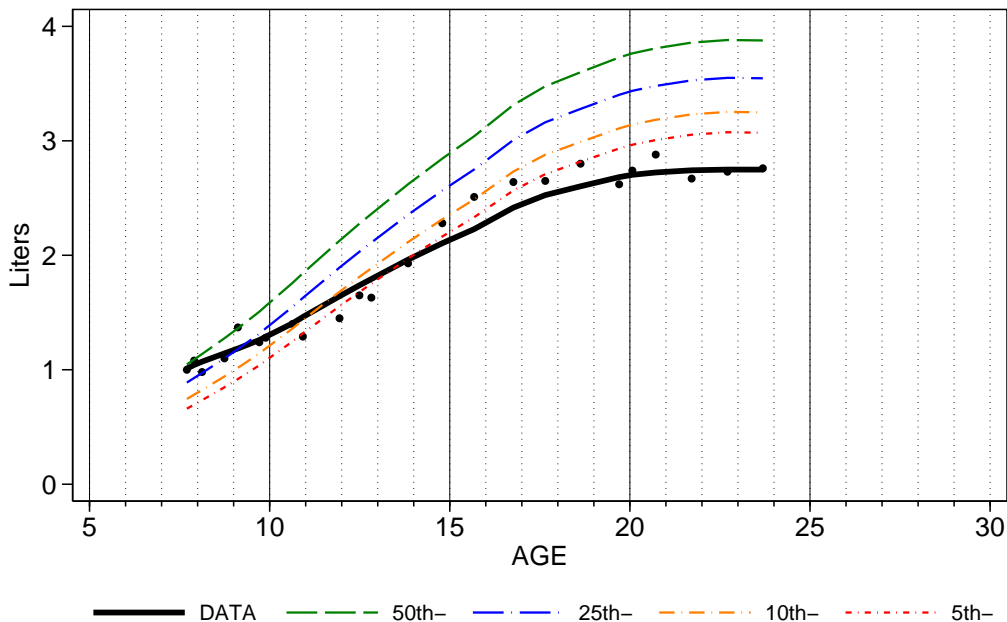

1771

**PATTERN OF GROWTH/DECLINE (Check One)**

- ( 1) Normal Growth
- ( 2) Normal Growth, Early Decline
- ( 3) Reduced Growth
- ( 4) Reduced Growth, Early Decline
- ( 9) Undetermined Pattern
- ( 8) Undetermined - not enough data

Maximum lung growth attained: ( 1) Yes ( 0) No

Plateau started: ( 2) No plateau ( 1) Yes ( 0) No

Decline started: ( 1) Yes ( 0) No

AGE AT each of the following periods (use '99' if N/A):

Maximum Lung Growth: \_\_\_\_ . \_\_\_\_

Start of Plateau: \_\_\_\_ . \_\_\_\_

Start of Decline: \_\_\_\_ . \_\_\_\_

### Pre-BD FEV1 Data and Percentiles: 1780

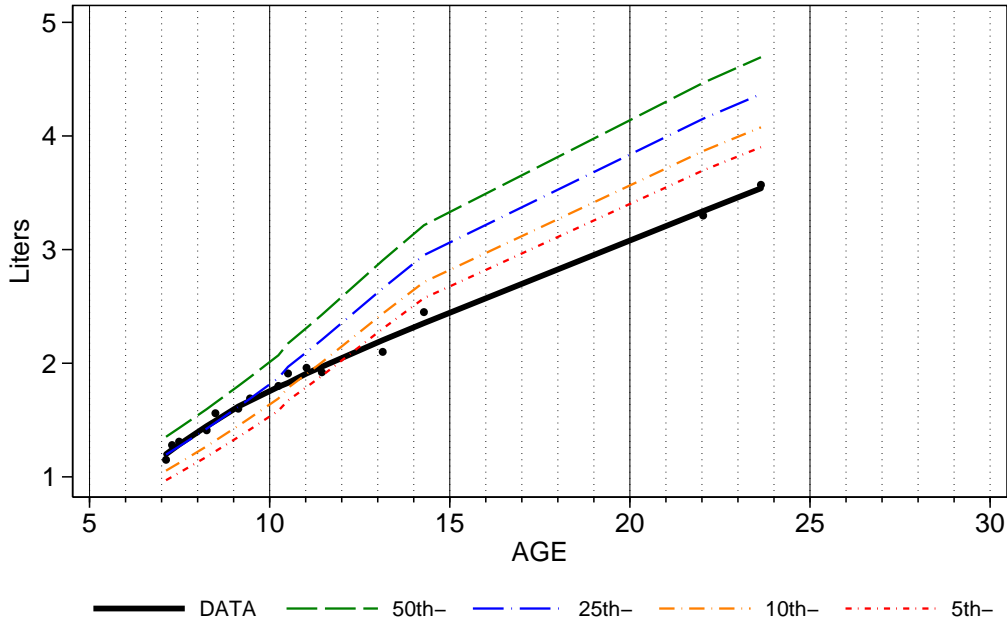

1780

**PATTERN OF GROWTH/DECLINE (Check One)**

- ( 1) Normal Growth
- ( 2) Normal Growth, Early Decline
- ( 3) Reduced Growth
- ( 4) Reduced Growth, Early Decline
- ( 9) Undetermined Pattern
- ( 8) Undetermined - not enough data

Maximum lung growth attained: ( 1) Yes ( 0) No

Plateau started: ( 2) No plateau ( 1) Yes ( 0) No

Decline started: ( 1) Yes ( 0) No

AGE AT each of the following periods (use '99' if N/A):

Maximum Lung Growth: \_\_\_\_ . \_\_\_\_

Start of Plateau: \_\_\_\_ . \_\_\_\_

Start of Decline: \_\_\_\_ . \_\_\_\_

### Pre-BD FEV1 Data and Percentiles: 1784

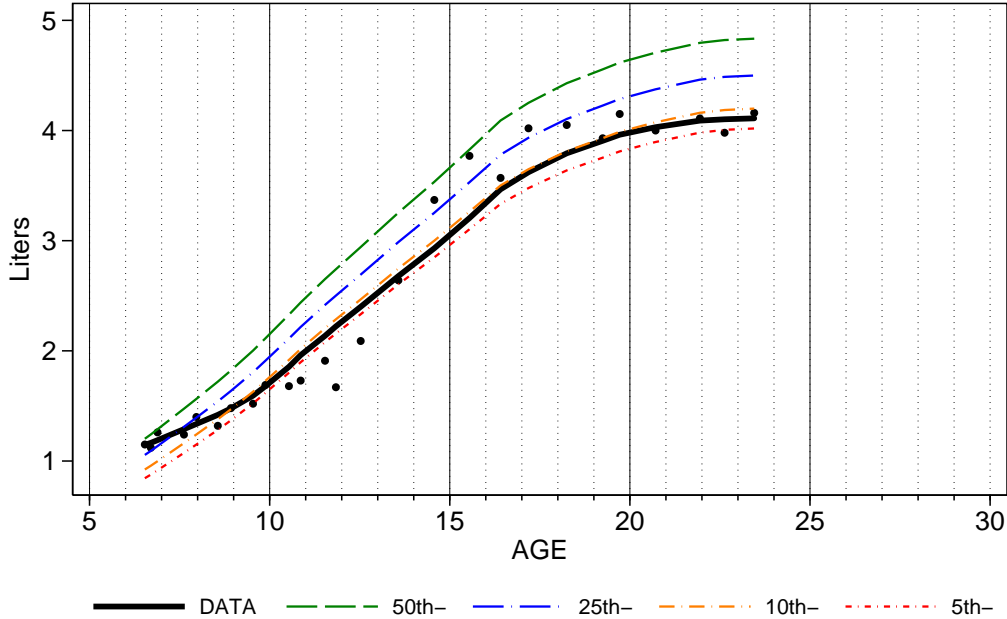

1784

**PATTERN OF GROWTH/DECLINE (Check One)**

- ( 1) Normal Growth
- ( 2) Normal Growth, Early Decline
- ( 3) Reduced Growth
- ( 4) Reduced Growth, Early Decline
- ( 9) Undetermined Pattern
- ( 8) Undetermined - not enough data

Maximum lung growth attained: ( 1) Yes ( 0) No

Plateau started: ( 2) No plateau ( 1) Yes ( 0) No

Decline started: ( 1) Yes ( 0) No

AGE AT each of the following periods (use '99' if N/A):

Maximum Lung Growth: \_\_\_\_ . \_\_\_\_

Start of Plateau: \_\_\_\_ . \_\_\_\_

Start of Decline: \_\_\_\_ . \_\_\_\_

### Pre-BD FEV1 Data and Percentiles: 1794

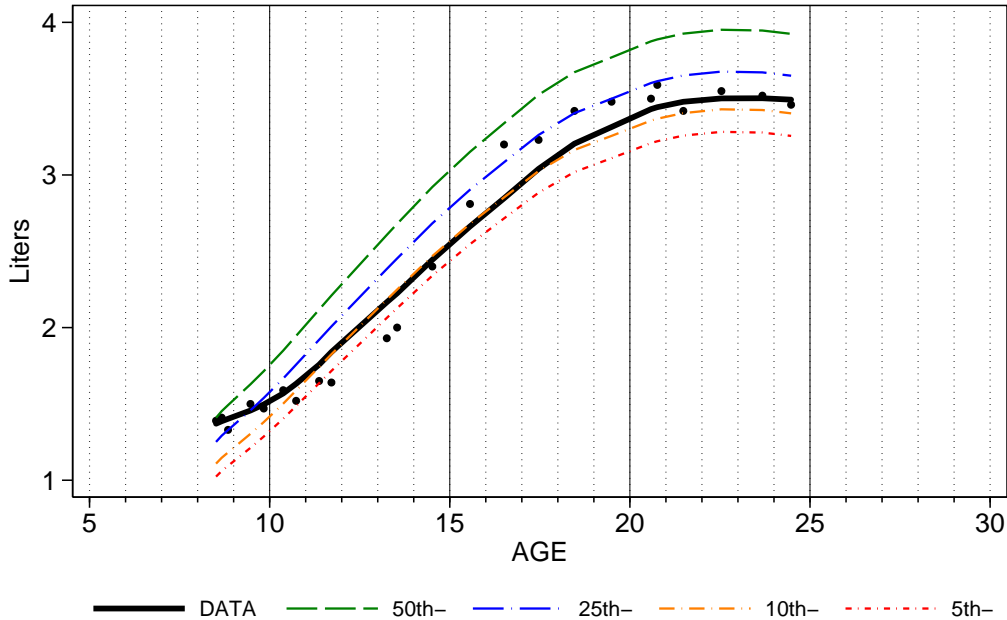

1794

**PATTERN OF GROWTH/DECLINE (Check One)**

- ( 1 ) Normal Growth
- ( 2 ) Normal Growth, Early Decline
- ( 3 ) Reduced Growth
- ( 4 ) Reduced Growth, Early Decline
- ( 9 ) Undetermined Pattern
- ( 8 ) Undetermined - not enough data

Maximum lung growth attained: ( 1 ) Yes ( 0 ) No

Plateau started: ( 2 ) No plateau ( 1 ) Yes ( 0 ) No

Decline started: ( 1 ) Yes ( 0 ) No

AGE AT each of the following periods (use '99' if N/A):

Maximum Lung Growth: \_\_\_\_ . \_\_\_\_

Start of Plateau: \_\_\_\_ . \_\_\_\_

Start of Decline: \_\_\_\_ . \_\_\_\_

### Pre-BD FEV1 Data and Percentiles: 1803

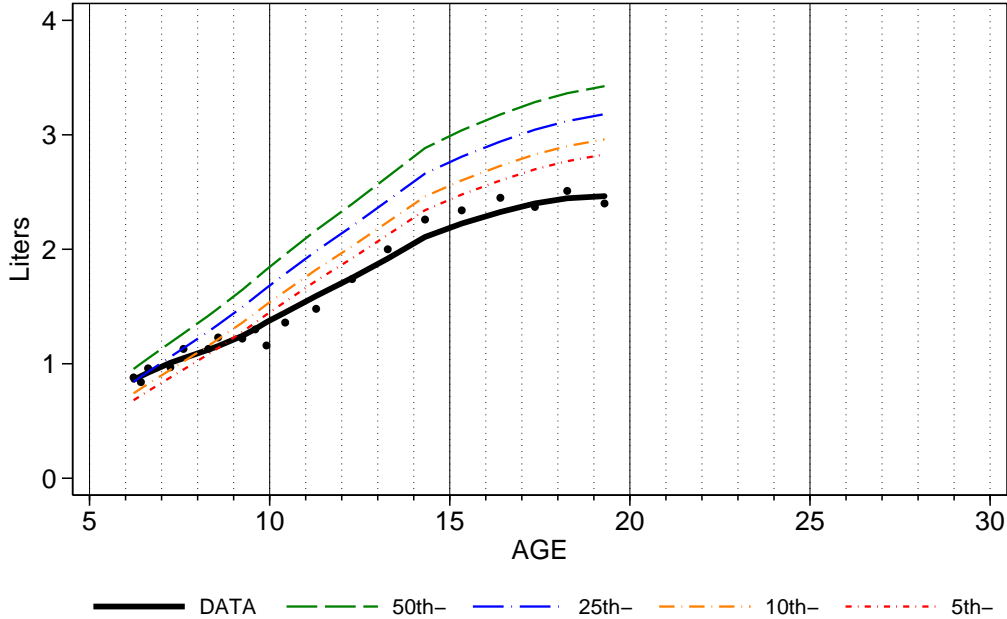

1803

**PATTERN OF GROWTH/DECLINE (Check One)**

- ( 1) Normal Growth
- ( 2) Normal Growth, Early Decline
- ( 3) Reduced Growth
- ( 4) Reduced Growth, Early Decline
- ( 9) Undetermined Pattern
- ( 8) Undetermined - not enough data

Maximum lung growth attained: ( 1) Yes ( 0) No

Plateau started: ( 2) No plateau ( 1) Yes ( 0) No

Decline started: ( 1) Yes ( 0) No

AGE AT each of the following periods (use '99' if N/A):

Maximum Lung Growth: \_\_\_\_ . \_\_\_\_

Start of Plateau: \_\_\_\_ . \_\_\_\_

Start of Decline: \_\_\_\_ . \_\_\_\_

### Pre-BD FEV1 Data and Percentiles: 1805

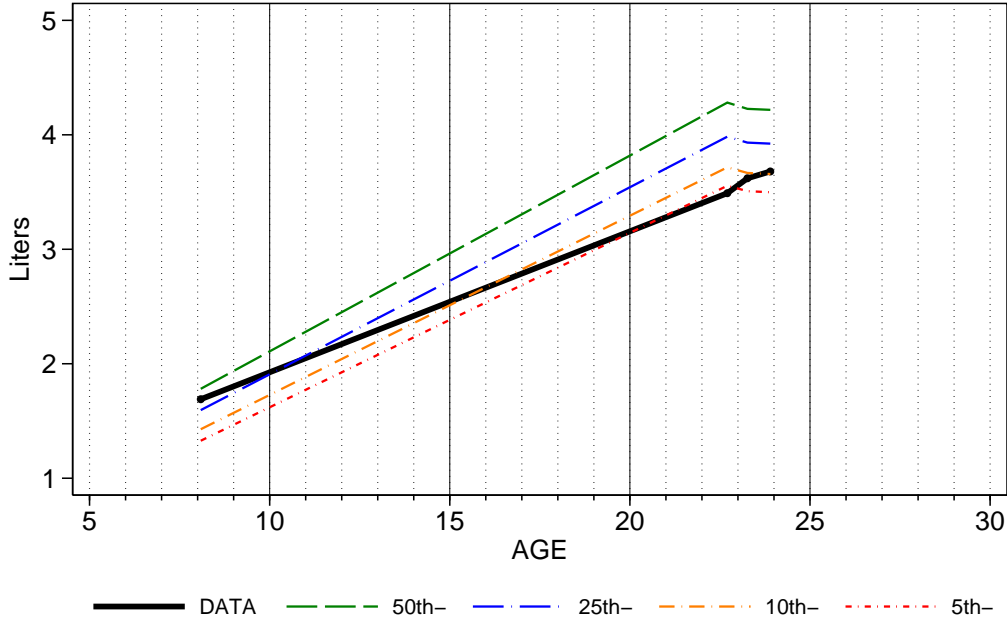

1805

**PATTERN OF GROWTH/DECLINE (Check One)**

- ( 1) Normal Growth
- ( 2) Normal Growth, Early Decline
- ( 3) Reduced Growth
- ( 4) Reduced Growth, Early Decline
- ( 9) Undetermined Pattern
- ( 8) Undetermined - not enough data

Maximum lung growth attained: ( 1) Yes ( 0) No

Plateau started: ( 2) No plateau ( 1) Yes ( 0) No

Decline started: ( 1) Yes ( 0) No

AGE AT each of the following periods (use '99' if N/A):

Maximum Lung Growth: \_\_\_\_ . \_\_\_\_

Start of Plateau: \_\_\_\_ . \_\_\_\_

Start of Decline: \_\_\_\_ . \_\_\_\_

### Pre-BD FEV1 Data and Percentiles: 1810

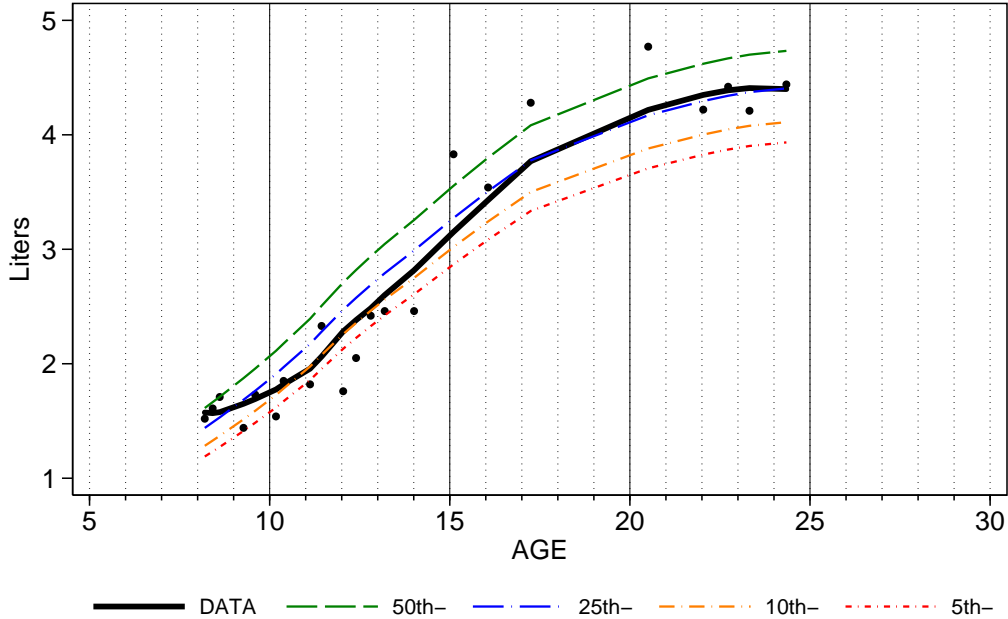

1810

**PATTERN OF GROWTH/DECLINE (Check One)**

- ( 1) Normal Growth
- ( 2) Normal Growth, Early Decline
- ( 3) Reduced Growth
- ( 4) Reduced Growth, Early Decline
- ( 9) Undetermined Pattern
- ( 8) Undetermined - not enough data

Maximum lung growth attained: ( 1) Yes ( 0) No

Plateau started: ( 2) No plateau ( 1) Yes ( 0) No

Decline started: ( 1) Yes ( 0) No

AGE AT each of the following periods (use '99' if N/A):

Maximum Lung Growth: \_\_\_\_ . \_\_\_\_

Start of Plateau: \_\_\_\_ . \_\_\_\_

Start of Decline: \_\_\_\_ . \_\_\_\_



### Pre-BD FEV1 Data and Percentiles: 1812

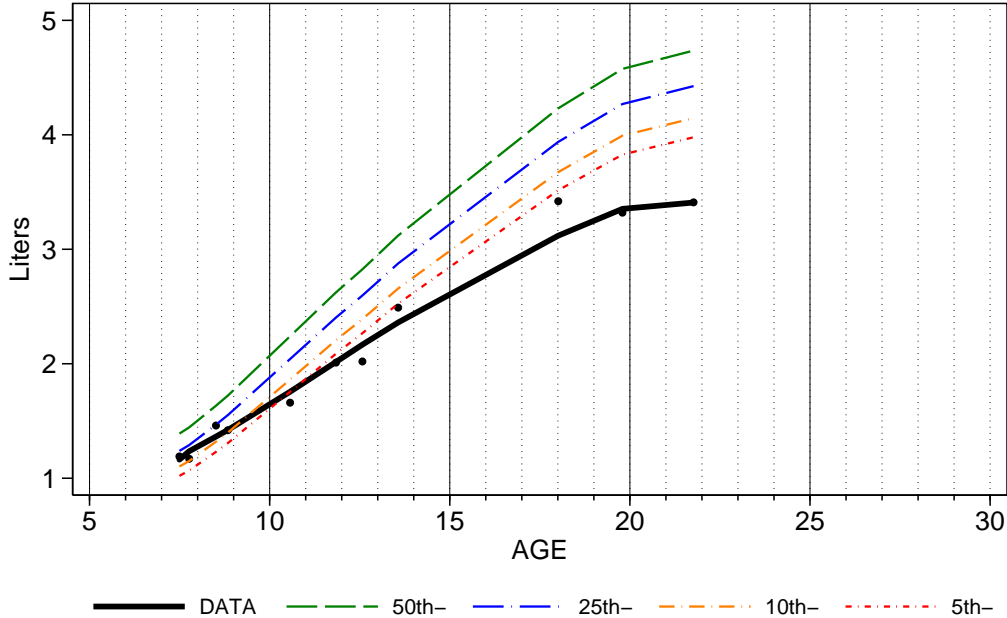

1812

**PATTERN OF GROWTH/DECLINE (Check One)**

- ( 1) Normal Growth
- ( 2) Normal Growth, Early Decline
- ( 3) Reduced Growth
- ( 4) Reduced Growth, Early Decline
- ( 9) Undetermined Pattern
- ( 8) Undetermined - not enough data

Maximum lung growth attained: ( 1) Yes ( 0) No

Plateau started: ( 2) No plateau ( 1) Yes ( 0) No

Decline started: ( 1) Yes ( 0) No

AGE AT each of the following periods (use '99' if N/A):

Maximum Lung Growth: \_\_\_\_ . \_\_\_\_

Start of Plateau: \_\_\_\_ . \_\_\_\_

Start of Decline: \_\_\_\_ . \_\_\_\_

### Pre-BD FEV1 Data and Percentiles: 1819

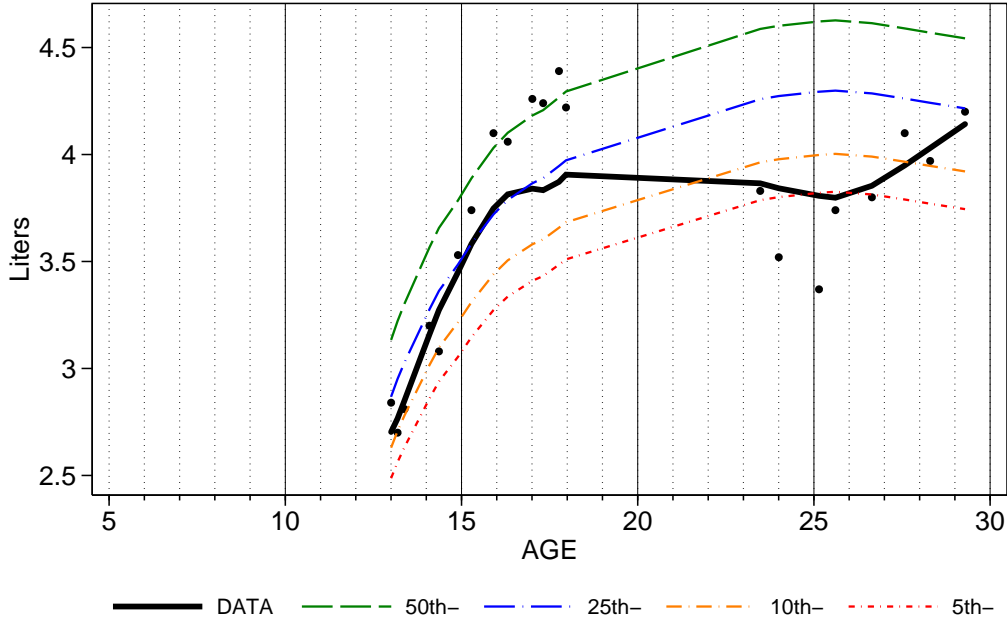

1819

**PATTERN OF GROWTH/DECLINE (Check One)**

- ( 1) Normal Growth
- ( 2) Normal Growth, Early Decline
- ( 3) Reduced Growth
- ( 4) Reduced Growth, Early Decline
- ( 9) Undetermined Pattern
- ( 8) Undetermined - not enough data

Maximum lung growth attained: ( 1) Yes ( 0) No

Plateau started: ( 2) No plateau ( 1) Yes ( 0) No

Decline started: ( 1) Yes ( 0) No

AGE AT each of the following periods (use '99' if N/A):

Maximum Lung Growth: \_\_\_\_ . \_\_\_\_

Start of Plateau: \_\_\_\_ . \_\_\_\_

Start of Decline: \_\_\_\_ . \_\_\_\_

### Pre-BD FEV1 Data and Percentiles: 1820

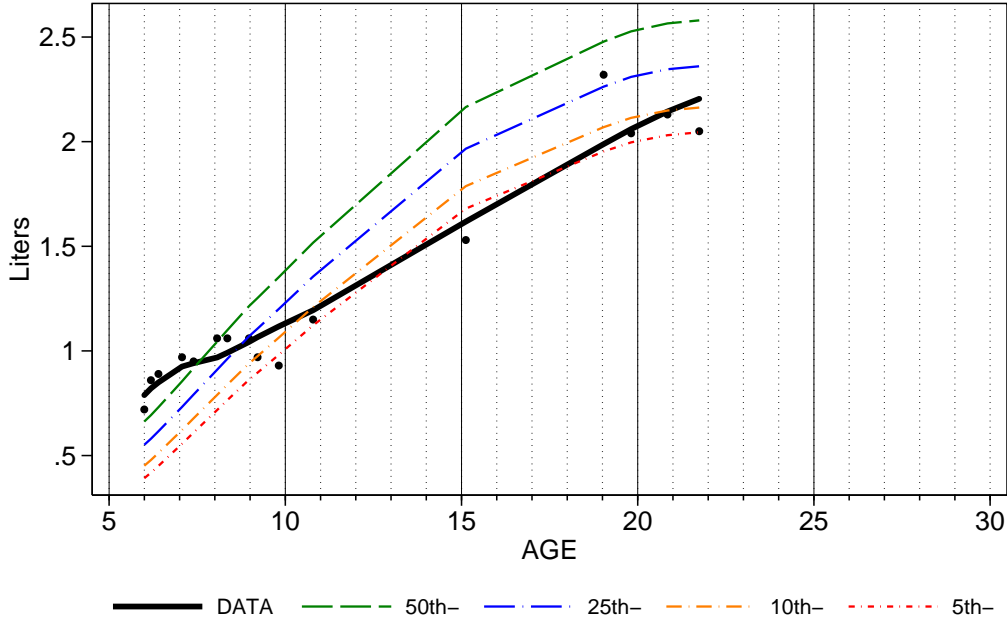

1820

**PATTERN OF GROWTH/DECLINE (Check One)**

- ( 1) Normal Growth
- ( 2) Normal Growth, Early Decline
- ( 3) Reduced Growth
- ( 4) Reduced Growth, Early Decline
- ( 9) Undetermined Pattern
- ( 8) Undetermined - not enough data

Maximum lung growth attained: ( 1) Yes ( 0) No

Plateau started: ( 2) No plateau ( 1) Yes ( 0) No

Decline started: ( 1) Yes ( 0) No

AGE AT each of the following periods (use '99' if N/A):

Maximum Lung Growth: \_\_\_\_ . \_\_\_\_

Start of Plateau: \_\_\_\_ . \_\_\_\_

Start of Decline: \_\_\_\_ . \_\_\_\_

### Pre-BD FEV1 Data and Percentiles: 1829

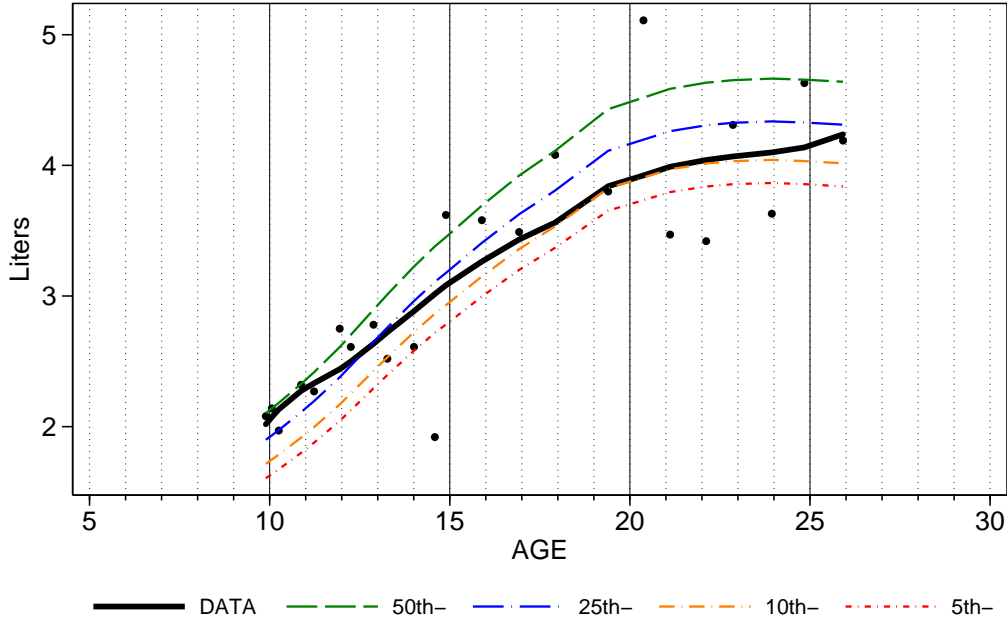

1829

**PATTERN OF GROWTH/DECLINE (Check One)**

- ( 1) Normal Growth
- ( 2) Normal Growth, Early Decline
- ( 3) Reduced Growth
- ( 4) Reduced Growth, Early Decline
- ( 9) Undetermined Pattern
- ( 8) Undetermined - not enough data

Maximum lung growth attained: ( 1) Yes ( 0) No

Plateau started: ( 2) No plateau ( 1) Yes ( 0) No

Decline started: ( 1) Yes ( 0) No

AGE AT each of the following periods (use '99' if N/A):

Maximum Lung Growth: \_\_\_\_ . \_\_\_\_

Start of Plateau: \_\_\_\_ . \_\_\_\_

Start of Decline: \_\_\_\_ . \_\_\_\_

### Pre-BD FEV1 Data and Percentiles: 1832

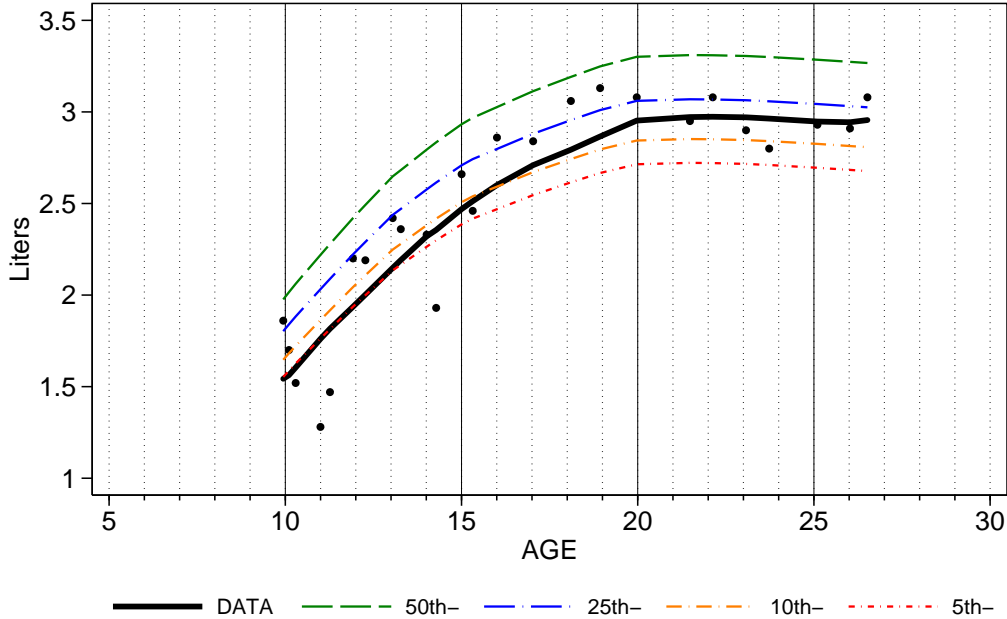

1832

**PATTERN OF GROWTH/DECLINE (Check One)**

- ( 1) Normal Growth
- ( 2) Normal Growth, Early Decline
- ( 3) Reduced Growth
- ( 4) Reduced Growth, Early Decline
- ( 9) Undetermined Pattern
- ( 8) Undetermined - not enough data

Maximum lung growth attained: ( 1) Yes ( 0) No

Plateau started: ( 2) No plateau ( 1) Yes ( 0) No

Decline started: ( 1) Yes ( 0) No

AGE AT each of the following periods (use '99' if N/A):

Maximum Lung Growth: \_\_\_\_ . \_\_\_\_

Start of Plateau: \_\_\_\_ . \_\_\_\_

Start of Decline: \_\_\_\_ . \_\_\_\_

### Pre-BD FEV1 Data and Percentiles: 1834

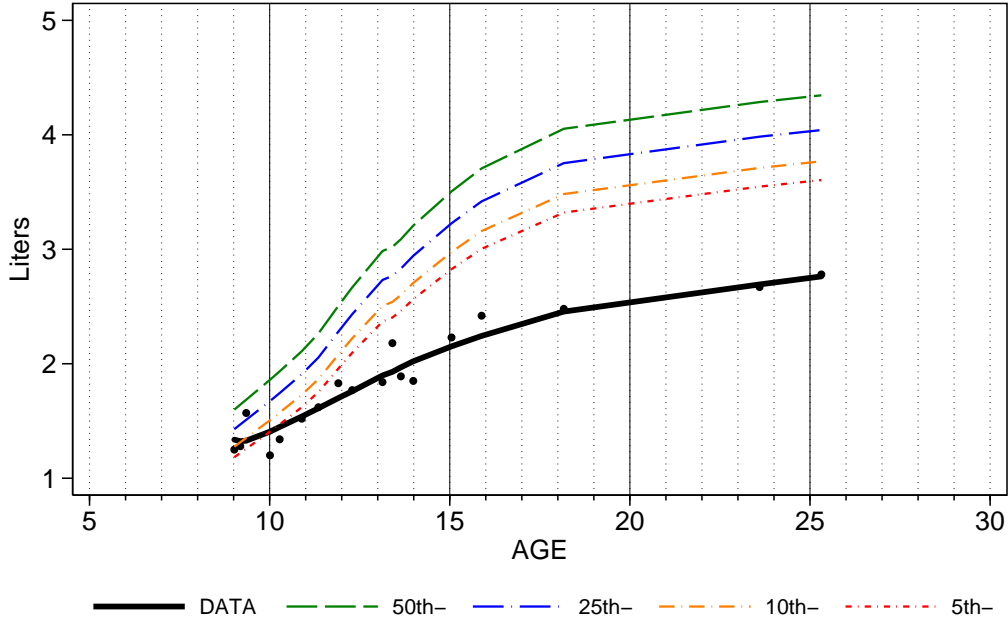

1834

**PATTERN OF GROWTH/DECLINE (Check One)**

- ( 1) Normal Growth
- ( 2) Normal Growth, Early Decline
- ( 3) Reduced Growth
- ( 4) Reduced Growth, Early Decline
- ( 9) Undetermined Pattern
- ( 8) Undetermined - not enough data

Maximum lung growth attained: ( 1) Yes ( 0) No

Plateau started: ( 2) No plateau ( 1) Yes ( 0) No

Decline started: ( 1) Yes ( 0) No

AGE AT each of the following periods (use '99' if N/A):

Maximum Lung Growth: \_\_\_\_ . \_\_\_\_

Start of Plateau: \_\_\_\_ . \_\_\_\_

Start of Decline: \_\_\_\_ . \_\_\_\_

### Pre-BD FEV1 Data and Percentiles: 1836

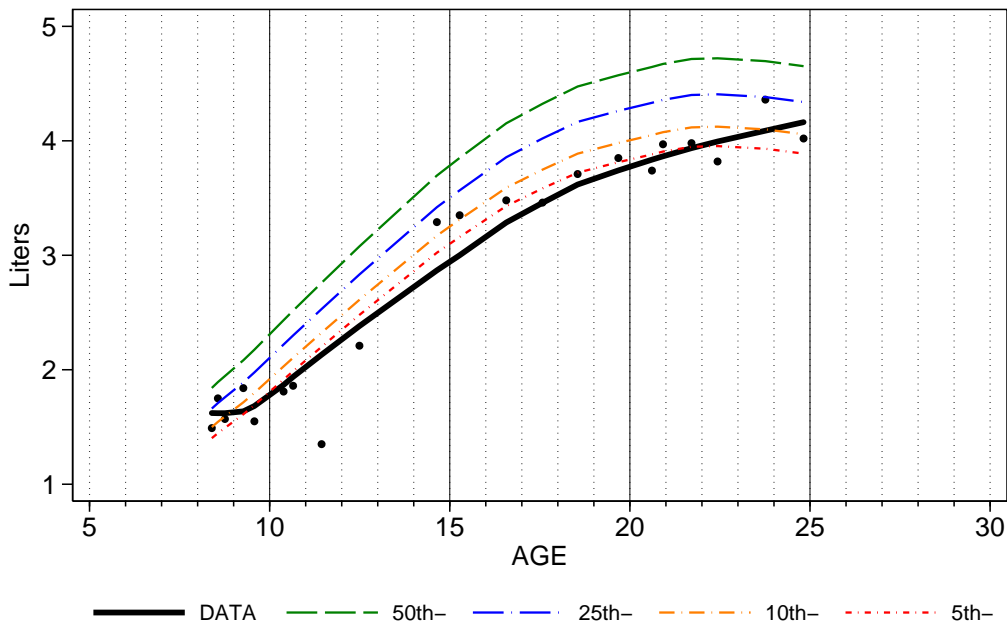

1836

**PATTERN OF GROWTH/DECLINE (Check One)**

- ( 1) Normal Growth
- ( 2) Normal Growth, Early Decline
- ( 3) Reduced Growth
- ( 4) Reduced Growth, Early Decline
- ( 9) Undetermined Pattern
- ( 8) Undetermined - not enough data

Maximum lung growth attained: ( 1) Yes ( 0) No

Plateau started: ( 2) No plateau ( 1) Yes ( 0) No

Decline started: ( 1) Yes ( 0) No

AGE AT each of the following periods (use '99' if N/A):

Maximum Lung Growth: \_\_\_\_ . \_\_\_\_

Start of Plateau: \_\_\_\_ . \_\_\_\_

Start of Decline: \_\_\_\_ . \_\_\_\_

### Pre-BD FEV1 Data and Percentiles: 1837

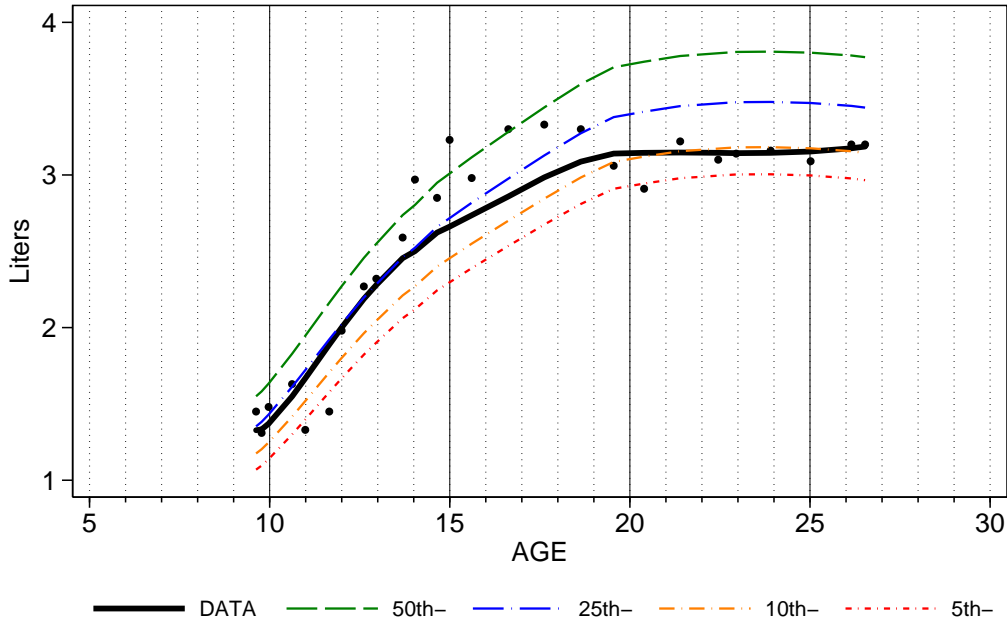

1837

**PATTERN OF GROWTH/DECLINE (Check One)**

- ( 1 ) Normal Growth
- ( 2 ) Normal Growth, Early Decline
- ( 3 ) Reduced Growth
- ( 4 ) Reduced Growth, Early Decline
- ( 9 ) Undetermined Pattern
- ( 8 ) Undetermined - not enough data

Maximum lung growth attained: ( 1 ) Yes ( 0 ) No

Plateau started: ( 2 ) No plateau ( 1 ) Yes ( 0 ) No

Decline started: ( 1 ) Yes ( 0 ) No

AGE AT each of the following periods (use '99' if N/A):

Maximum Lung Growth: \_\_\_\_ . \_\_\_\_

Start of Plateau: \_\_\_\_ . \_\_\_\_

Start of Decline: \_\_\_\_ . \_\_\_\_



### Pre-BD FEV1 Data and Percentiles: 1841

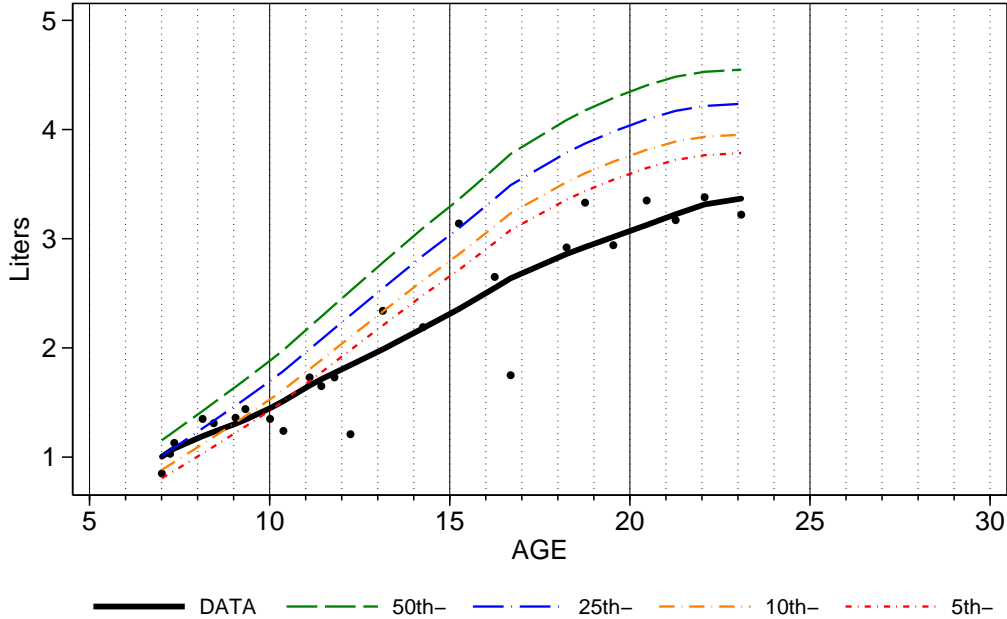

1841

**PATTERN OF GROWTH/DECLINE (Check One)**

- ( 1) Normal Growth
- ( 2) Normal Growth, Early Decline
- ( 3) Reduced Growth
- ( 4) Reduced Growth, Early Decline
- ( 9) Undetermined Pattern
- ( 8) Undetermined - not enough data

Maximum lung growth attained: ( 1) Yes ( 0) No

Plateau started: ( 2) No plateau ( 1) Yes ( 0) No

Decline started: ( 1) Yes ( 0) No

AGE AT each of the following periods (use '99' if N/A):

Maximum Lung Growth: \_\_\_\_ . \_\_\_\_

Start of Plateau: \_\_\_\_ . \_\_\_\_

Start of Decline: \_\_\_\_ . \_\_\_\_

### Pre-BD FEV1 Data and Percentiles: 1844

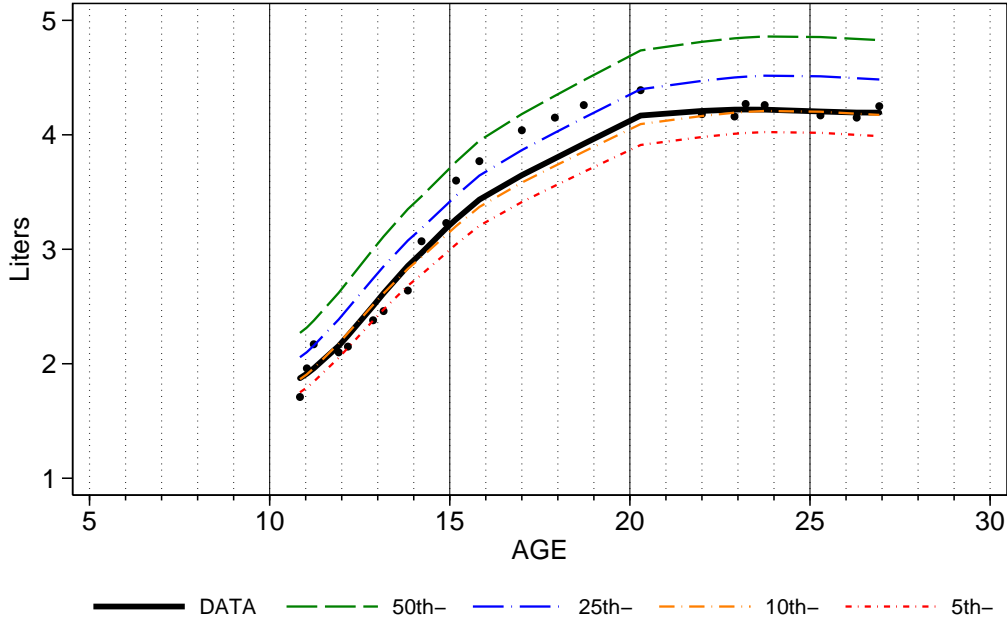

1844

**PATTERN OF GROWTH/DECLINE (Check One)**

- ( 1 ) Normal Growth
- ( 2 ) Normal Growth, Early Decline
- ( 3 ) Reduced Growth
- ( 4 ) Reduced Growth, Early Decline
- ( 9 ) Undetermined Pattern
- ( 8 ) Undetermined - not enough data

Maximum lung growth attained: ( 1 ) Yes ( 0 ) No

Plateau started: ( 2 ) No plateau ( 1 ) Yes ( 0 ) No

Decline started: ( 1 ) Yes ( 0 ) No

AGE AT each of the following periods (use '99' if N/A):

Maximum Lung Growth: \_\_\_\_ . \_\_\_\_

Start of Plateau: \_\_\_\_ . \_\_\_\_

Start of Decline: \_\_\_\_ . \_\_\_\_

### Pre-BD FEV1 Data and Percentiles: 1846

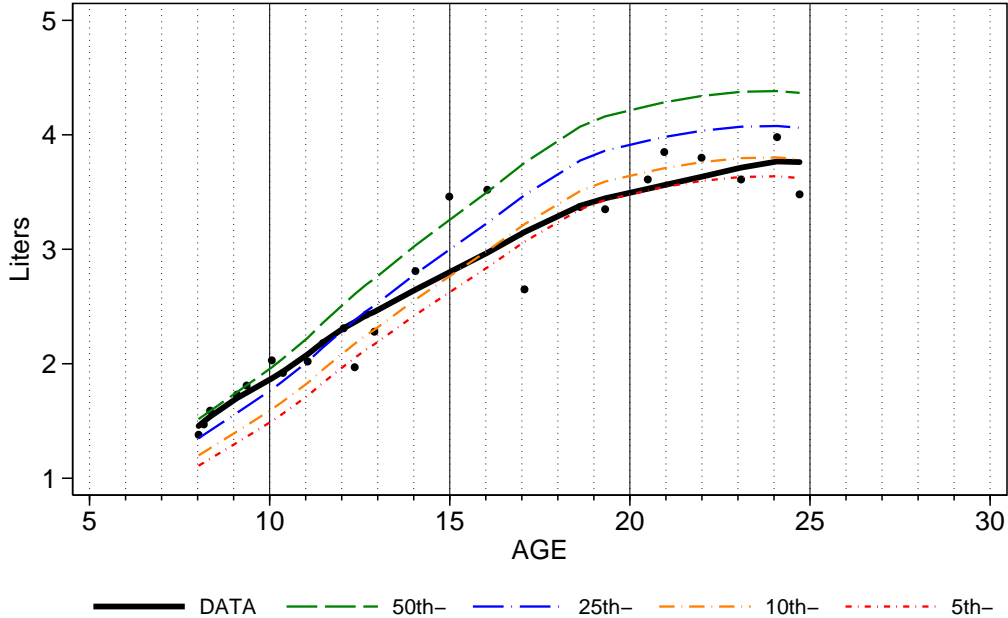

1846

**PATTERN OF GROWTH/DECLINE (Check One)**

- ( 1 ) Normal Growth
- ( 2 ) Normal Growth, Early Decline
- ( 3 ) Reduced Growth
- ( 4 ) Reduced Growth, Early Decline
- ( 9 ) Undetermined Pattern
- ( 8 ) Undetermined - not enough data

Maximum lung growth attained: ( 1 ) Yes ( 0 ) No

Plateau started: ( 2 ) No plateau ( 1 ) Yes ( 0 ) No

Decline started: ( 1 ) Yes ( 0 ) No

AGE AT each of the following periods (use '99' if N/A):

Maximum Lung Growth: \_\_\_\_ . \_\_\_\_

Start of Plateau: \_\_\_\_ . \_\_\_\_

Start of Decline: \_\_\_\_ . \_\_\_\_

### Pre-BD FEV1 Data and Percentiles: 1852

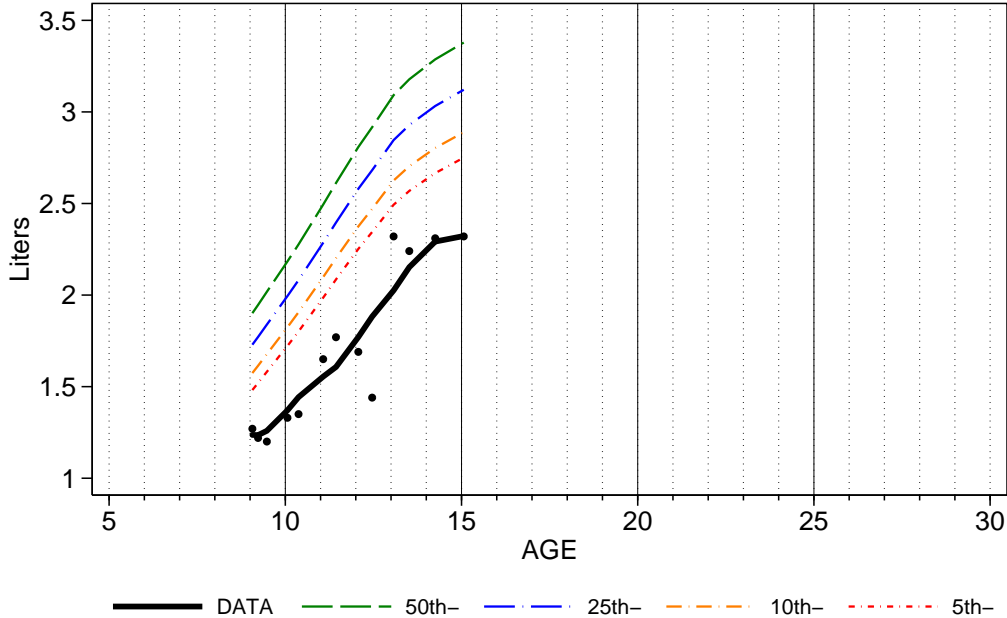

1852

**PATTERN OF GROWTH/DECLINE (Check One)**

- ( 1 ) Normal Growth
- ( 2 ) Normal Growth, Early Decline
- ( 3 ) Reduced Growth
- ( 4 ) Reduced Growth, Early Decline
- ( 9 ) Undetermined Pattern
- ( 8 ) Undetermined - not enough data

Maximum lung growth attained: ( 1 ) Yes ( 0 ) No

Plateau started: ( 2 ) No plateau ( 1 ) Yes ( 0 ) No

Decline started: ( 1 ) Yes ( 0 ) No

AGE AT each of the following periods (use '99' if N/A):

Maximum Lung Growth: \_\_\_\_ . \_\_\_\_

Start of Plateau: \_\_\_\_ . \_\_\_\_

Start of Decline: \_\_\_\_ . \_\_\_\_

### Pre-BD FEV1 Data and Percentiles: 1853

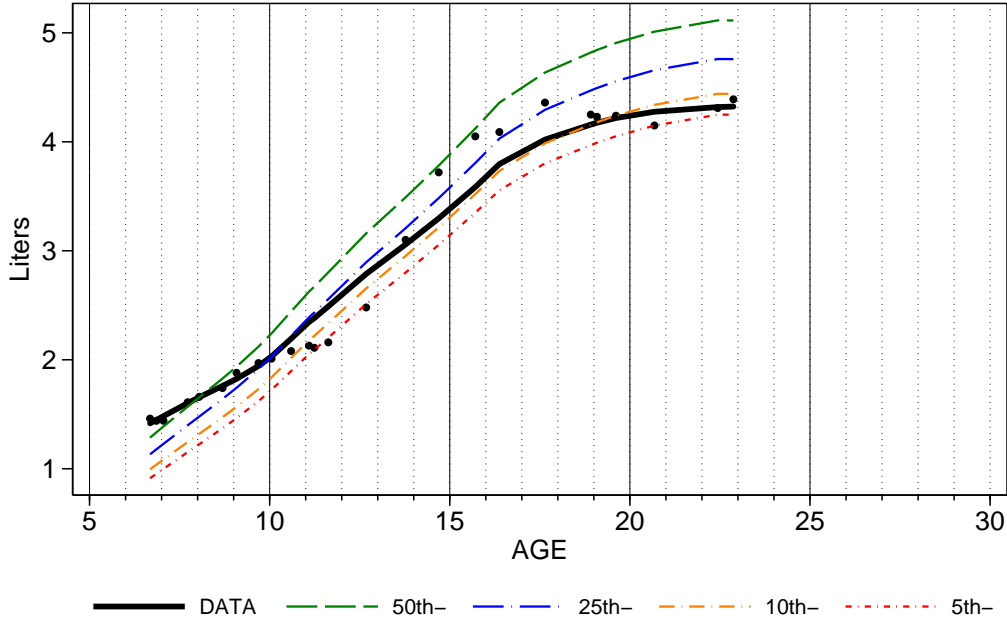

1853

**PATTERN OF GROWTH/DECLINE (Check One)**

- ( 1) Normal Growth
- ( 2) Normal Growth, Early Decline
- ( 3) Reduced Growth
- ( 4) Reduced Growth, Early Decline
- ( 9) Undetermined Pattern
- ( 8) Undetermined - not enough data

Maximum lung growth attained: ( 1) Yes ( 0) No

Plateau started: ( 2) No plateau ( 1) Yes ( 0) No

Decline started: ( 1) Yes ( 0) No

AGE AT each of the following periods (use '99' if N/A):

Maximum Lung Growth: \_\_\_\_ . \_\_\_\_

Start of Plateau: \_\_\_\_ . \_\_\_\_

Start of Decline: \_\_\_\_ . \_\_\_\_

### Pre-BD FEV1 Data and Percentiles: 1854

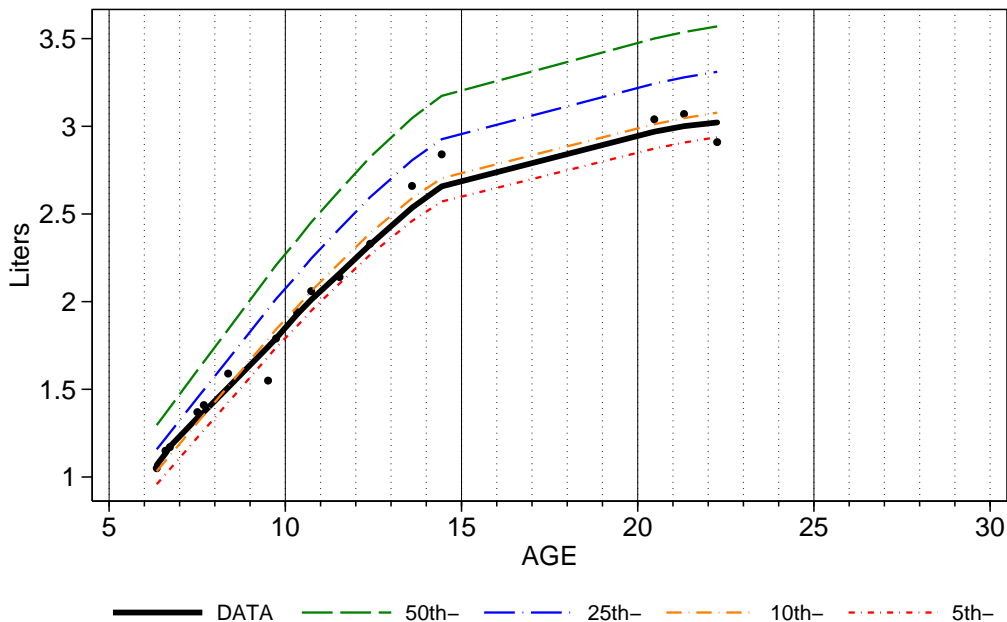

1854

**PATTERN OF GROWTH/DECLINE (Check One)**

- ( 1 ) Normal Growth
- ( 2 ) Normal Growth, Early Decline
- ( 3 ) Reduced Growth
- ( 4 ) Reduced Growth, Early Decline
- ( 9 ) Undetermined Pattern
- ( 8 ) Undetermined - not enough data

Maximum lung growth attained: ( 1 ) Yes ( 0 ) No

Plateau started: ( 2 ) No plateau ( 1 ) Yes ( 0 ) No

Decline started: ( 1 ) Yes ( 0 ) No

AGE AT each of the following periods (use '99' if N/A):

Maximum Lung Growth: \_\_\_\_ . \_\_\_\_

Start of Plateau: \_\_\_\_ . \_\_\_\_

Start of Decline: \_\_\_\_ . \_\_\_\_

### Pre-BD FEV1 Data and Percentiles: 1857

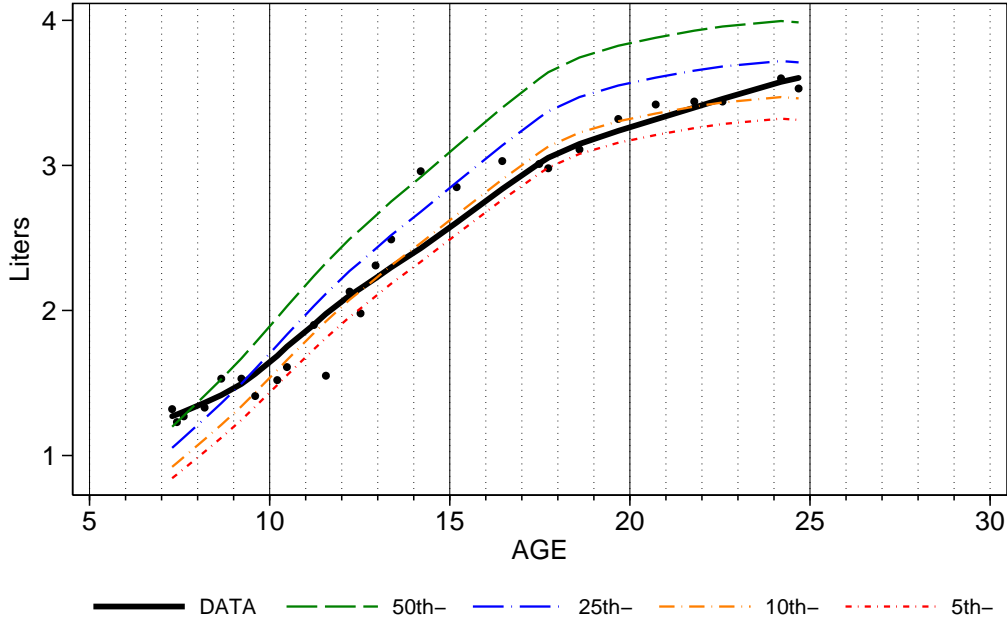

1857

**PATTERN OF GROWTH/DECLINE (Check One)**

- ( 1) Normal Growth
- ( 2) Normal Growth, Early Decline
- ( 3) Reduced Growth
- ( 4) Reduced Growth, Early Decline
- ( 9) Undetermined Pattern
- ( 8) Undetermined - not enough data

Maximum lung growth attained: ( 1) Yes ( 0) No

Plateau started: ( 2) No plateau ( 1) Yes ( 0) No

Decline started: ( 1) Yes ( 0) No

AGE AT each of the following periods (use '99' if N/A):

Maximum Lung Growth: \_\_\_\_ . \_\_\_\_

Start of Plateau: \_\_\_\_ . \_\_\_\_

Start of Decline: \_\_\_\_ . \_\_\_\_

### Pre-BD FEV1 Data and Percentiles: 1862

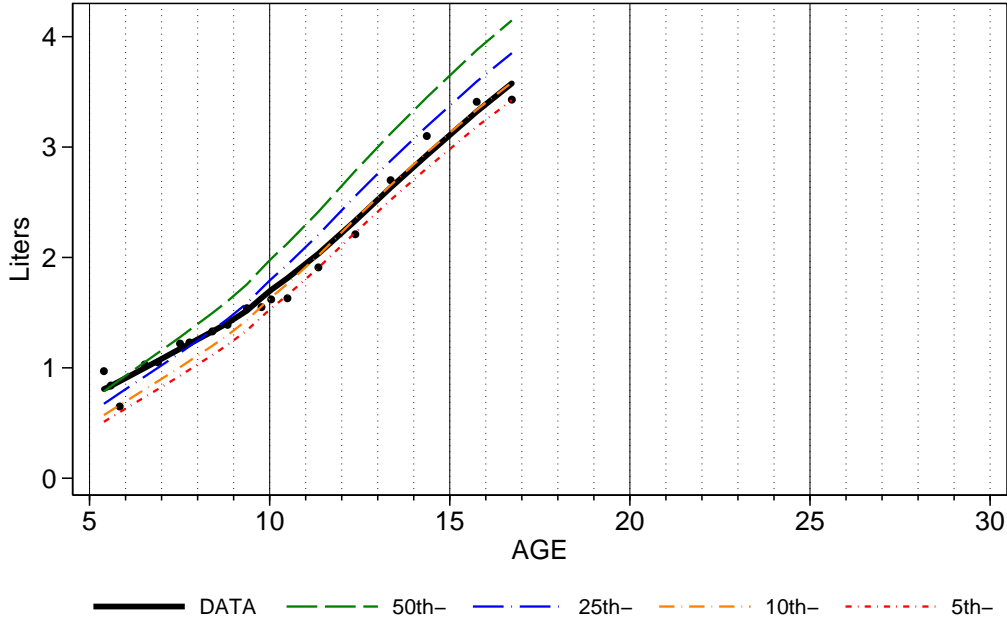

1862

**PATTERN OF GROWTH/DECLINE (Check One)**

- ( 1) Normal Growth
- ( 2) Normal Growth, Early Decline
- ( 3) Reduced Growth
- ( 4) Reduced Growth, Early Decline
- ( 9) Undetermined Pattern
- ( 8) Undetermined - not enough data

Maximum lung growth attained: ( 1) Yes ( 0) No

Plateau started: ( 2) No plateau ( 1) Yes ( 0) No

Decline started: ( 1) Yes ( 0) No

AGE AT each of the following periods (use '99' if N/A):

Maximum Lung Growth: \_\_\_\_ . \_\_\_\_

Start of Plateau: \_\_\_\_ . \_\_\_\_

Start of Decline: \_\_\_\_ . \_\_\_\_



### Pre-BD FEV1 Data and Percentiles: 1867

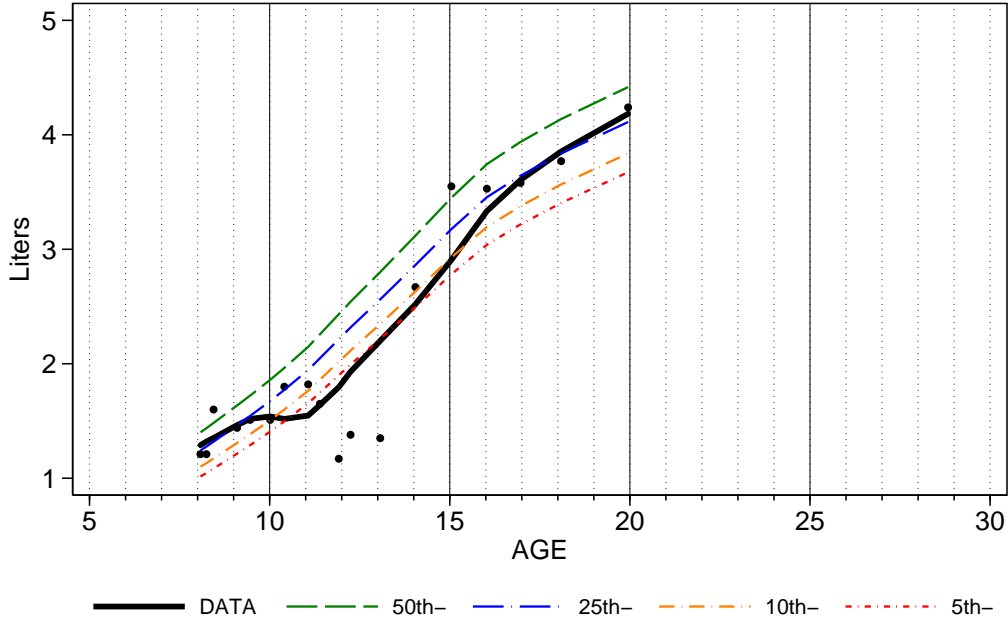

1867

**PATTERN OF GROWTH/DECLINE (Check One)**

- ( 1 ) Normal Growth
- ( 2 ) Normal Growth, Early Decline
- ( 3 ) Reduced Growth
- ( 4 ) Reduced Growth, Early Decline
- ( 9 ) Undetermined Pattern
- ( 8 ) Undetermined - not enough data

Maximum lung growth attained: ( 1 ) Yes ( 0 ) No

Plateau started: ( 2 ) No plateau ( 1 ) Yes ( 0 ) No

Decline started: ( 1 ) Yes ( 0 ) No

AGE AT each of the following periods (use '99' if N/A):

Maximum Lung Growth: \_\_\_\_ . \_\_\_\_

Start of Plateau: \_\_\_\_ . \_\_\_\_

Start of Decline: \_\_\_\_ . \_\_\_\_

### Pre-BD FEV1 Data and Percentiles: 1872

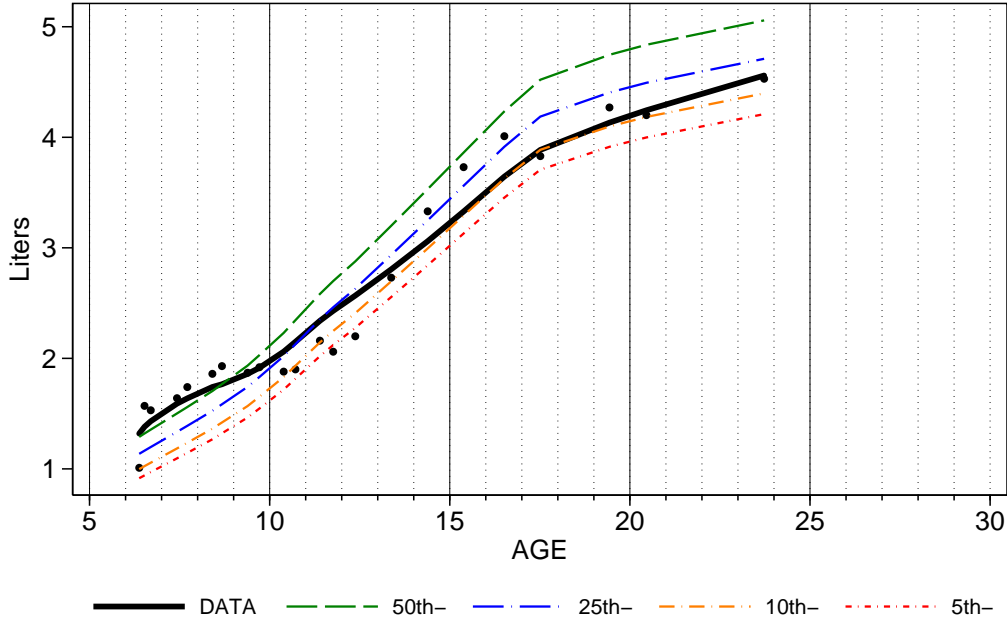

1872

**PATTERN OF GROWTH/DECLINE (Check One)**

- ( 1) Normal Growth
- ( 2) Normal Growth, Early Decline
- ( 3) Reduced Growth
- ( 4) Reduced Growth, Early Decline
- ( 9) Undetermined Pattern
- ( 8) Undetermined - not enough data

Maximum lung growth attained: ( 1) Yes ( 0) No

Plateau started: ( 2) No plateau ( 1) Yes ( 0) No

Decline started: ( 1) Yes ( 0) No

AGE AT each of the following periods (use '99' if N/A):

Maximum Lung Growth: \_\_\_\_ . \_\_\_\_

Start of Plateau: \_\_\_\_ . \_\_\_\_

Start of Decline: \_\_\_\_ . \_\_\_\_

### Pre-BD FEV1 Data and Percentiles: 1874

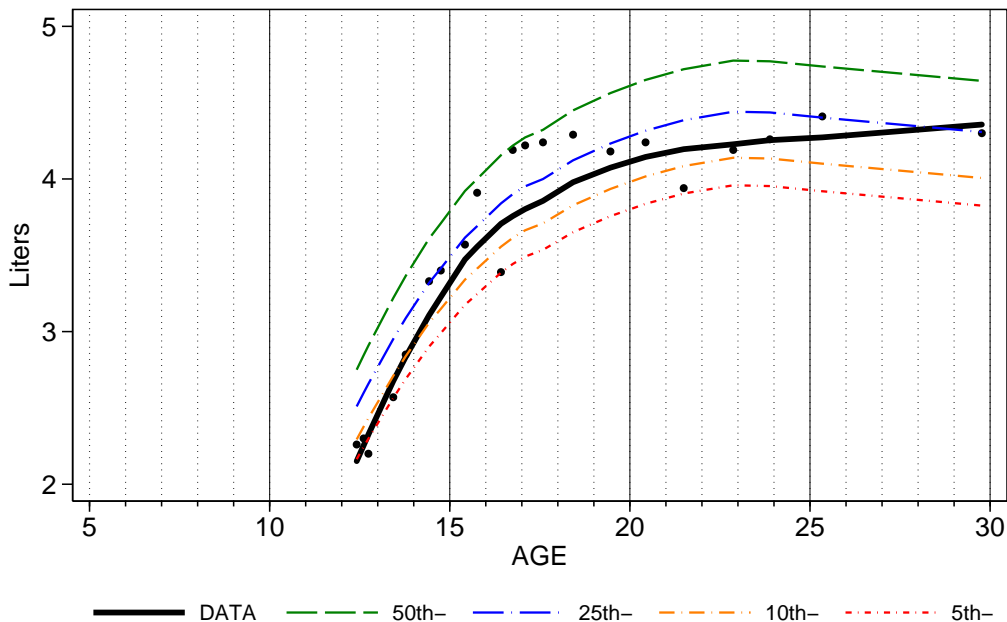

1874

**PATTERN OF GROWTH/DECLINE (Check One)**

- ( 1) Normal Growth
- ( 2) Normal Growth, Early Decline
- ( 3) Reduced Growth
- ( 4) Reduced Growth, Early Decline
- ( 9) Undetermined Pattern
- ( 8) Undetermined - not enough data

Maximum lung growth attained: ( 1) Yes ( 0) No

Plateau started: ( 2) No plateau ( 1) Yes ( 0) No

Decline started: ( 1) Yes ( 0) No

AGE AT each of the following periods (use '99' if N/A):

Maximum Lung Growth: \_\_\_\_ . \_\_\_\_

Start of Plateau: \_\_\_\_ . \_\_\_\_

Start of Decline: \_\_\_\_ . \_\_\_\_

### Pre-BD FEV1 Data and Percentiles: 1876

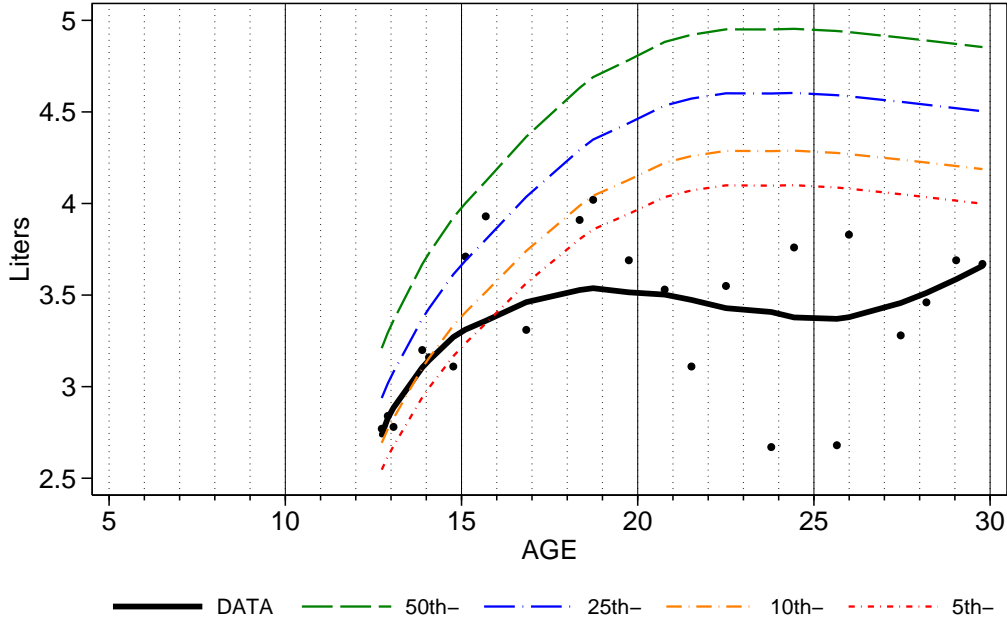

1876

**PATTERN OF GROWTH/DECLINE (Check One)**

- ( 1) Normal Growth
- ( 2) Normal Growth, Early Decline
- ( 3) Reduced Growth
- ( 4) Reduced Growth, Early Decline
- ( 9) Undetermined Pattern
- ( 8) Undetermined - not enough data

Maximum lung growth attained: ( 1) Yes ( 0) No

Plateau started: ( 2) No plateau ( 1) Yes ( 0) No

Decline started: ( 1) Yes ( 0) No

AGE AT each of the following periods (use '99' if N/A):

Maximum Lung Growth: \_\_\_\_ . \_\_\_\_

Start of Plateau: \_\_\_\_ . \_\_\_\_

Start of Decline: \_\_\_\_ . \_\_\_\_

### Pre-BD FEV1 Data and Percentiles: 1883

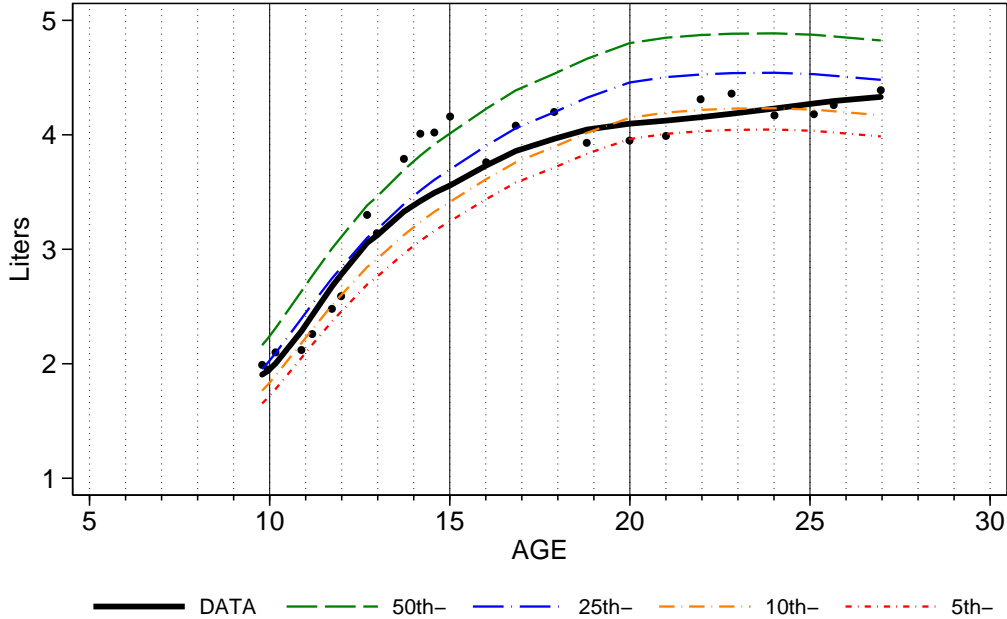

1883

**PATTERN OF GROWTH/DECLINE (Check One)**

- ( 1) Normal Growth
- ( 2) Normal Growth, Early Decline
- ( 3) Reduced Growth
- ( 4) Reduced Growth, Early Decline
- ( 9) Undetermined Pattern
- ( 8) Undetermined - not enough data

Maximum lung growth attained: ( 1) Yes ( 0) No

Plateau started: ( 2) No plateau ( 1) Yes ( 0) No

Decline started: ( 1) Yes ( 0) No

AGE AT each of the following periods (use '99' if N/A):

Maximum Lung Growth: \_\_\_\_ . \_\_\_\_

Start of Plateau: \_\_\_\_ . \_\_\_\_

Start of Decline: \_\_\_\_ . \_\_\_\_

### Pre-BD FEV1 Data and Percentiles: 1888

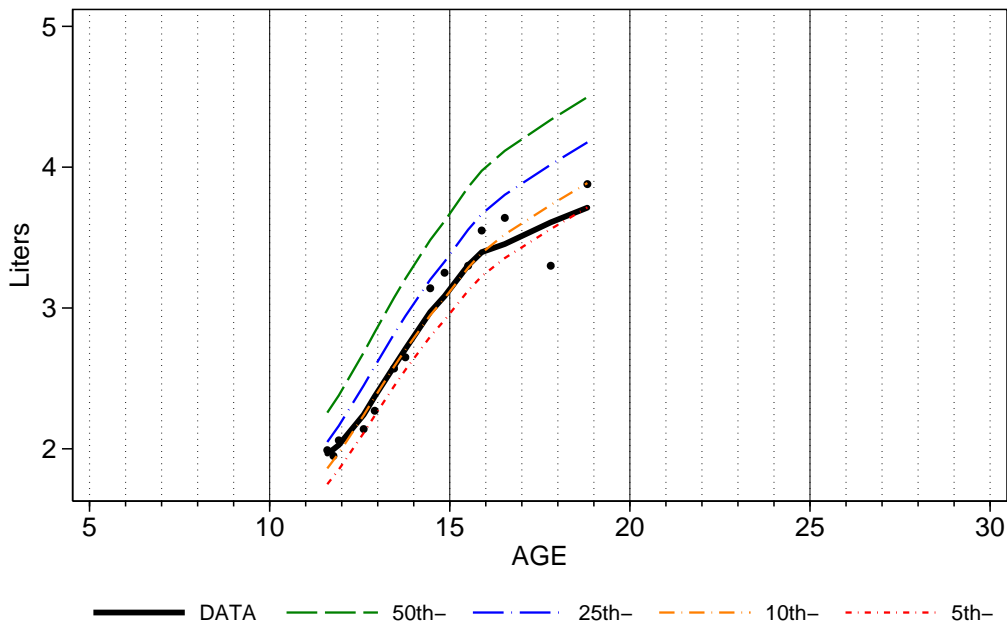

1888

**PATTERN OF GROWTH/DECLINE (Check One)**

- ( 1 ) Normal Growth
- ( 2 ) Normal Growth, Early Decline
- ( 3 ) Reduced Growth
- ( 4 ) Reduced Growth, Early Decline
- ( 9 ) Undetermined Pattern
- ( 8 ) Undetermined - not enough data

Maximum lung growth attained: ( 1 ) Yes ( 0 ) No

Plateau started: ( 2 ) No plateau ( 1 ) Yes ( 0 ) No

Decline started: ( 1 ) Yes ( 0 ) No

AGE AT each of the following periods (use '99' if N/A):

Maximum Lung Growth: \_\_\_\_ . \_\_\_\_

Start of Plateau: \_\_\_\_ . \_\_\_\_

Start of Decline: \_\_\_\_ . \_\_\_\_

### Pre-BD FEV1 Data and Percentiles: 1890

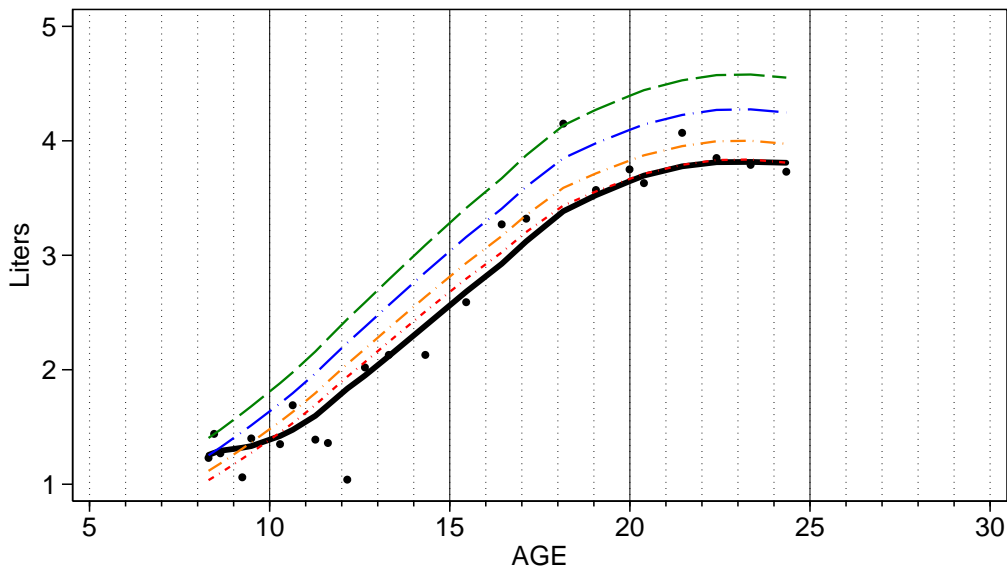

DATA  
  50th-  
  25th-  
  10th-  
  5th-

1890

**PATTERN OF GROWTH/DECLINE (Check One)**

- ( 1 ) Normal Growth
- ( 2 ) Normal Growth, Early Decline
- ( 3 ) Reduced Growth
- ( 4 ) Reduced Growth, Early Decline
- ( 9 ) Undetermined Pattern
- ( 8 ) Undetermined - not enough data

Maximum lung growth attained: ( 1 ) Yes ( 0 ) No

Plateau started: ( 2 ) No plateau ( 1 ) Yes ( 0 ) No

Decline started: ( 1 ) Yes ( 0 ) No

AGE AT each of the following periods (use '99' if N/A):

Maximum Lung Growth: \_\_\_\_ . \_\_\_\_

Start of Plateau: \_\_\_\_ . \_\_\_\_

Start of Decline: \_\_\_\_ . \_\_\_\_

### Pre-BD FEV1 Data and Percentiles: 1891

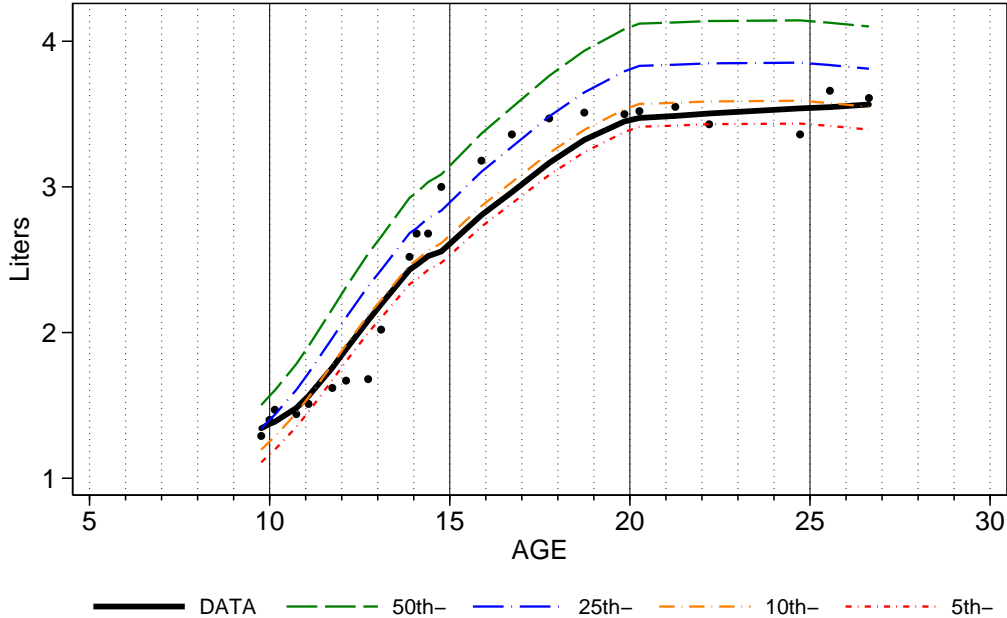

1891

**PATTERN OF GROWTH/DECLINE (Check One)**

- ( 1 ) Normal Growth
- ( 2 ) Normal Growth, Early Decline
- ( 3 ) Reduced Growth
- ( 4 ) Reduced Growth, Early Decline
- ( 9 ) Undetermined Pattern
- ( 8 ) Undetermined - not enough data

Maximum lung growth attained: ( 1 ) Yes ( 0 ) No

Plateau started: ( 2 ) No plateau ( 1 ) Yes ( 0 ) No

Decline started: ( 1 ) Yes ( 0 ) No

AGE AT each of the following periods (use '99' if N/A):

Maximum Lung Growth: \_\_\_\_ . \_\_\_\_

Start of Plateau: \_\_\_\_ . \_\_\_\_

Start of Decline: \_\_\_\_ . \_\_\_\_



### Pre-BD FEV1 Data and Percentiles: 1899

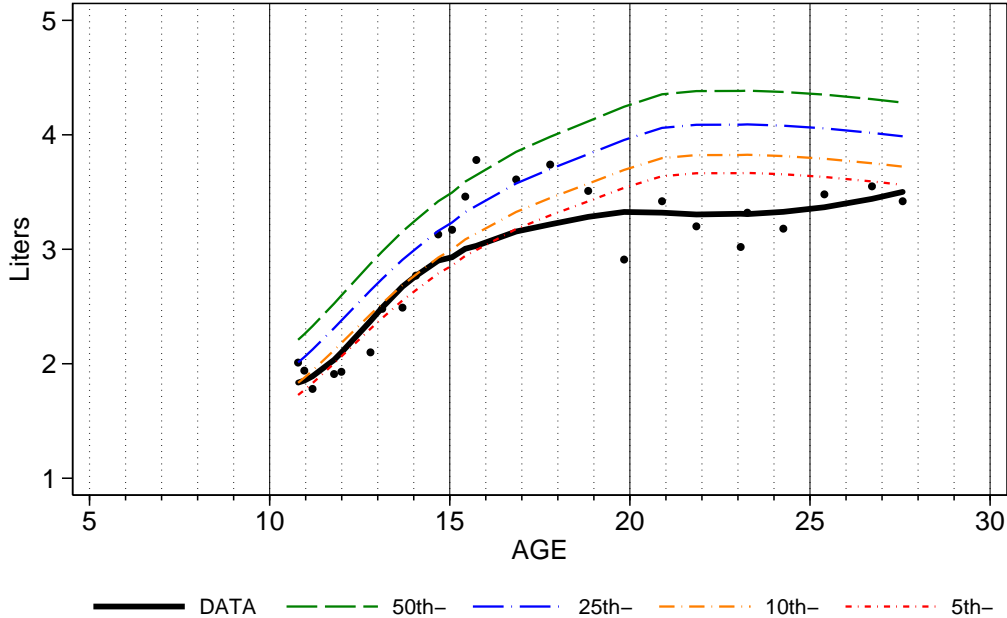

1899

**PATTERN OF GROWTH/DECLINE (Check One)**

- ( 1) Normal Growth
- ( 2) Normal Growth, Early Decline
- ( 3) Reduced Growth
- ( 4) Reduced Growth, Early Decline
- ( 9) Undetermined Pattern
- ( 8) Undetermined - not enough data

Maximum lung growth attained: ( 1) Yes ( 0) No

Plateau started: ( 2) No plateau ( 1) Yes ( 0) No

Decline started: ( 1) Yes ( 0) No

AGE AT each of the following periods (use '99' if N/A):

Maximum Lung Growth: \_\_\_\_ . \_\_\_\_

Start of Plateau: \_\_\_\_ . \_\_\_\_

Start of Decline: \_\_\_\_ . \_\_\_\_

### Pre-BD FEV1 Data and Percentiles: 1902

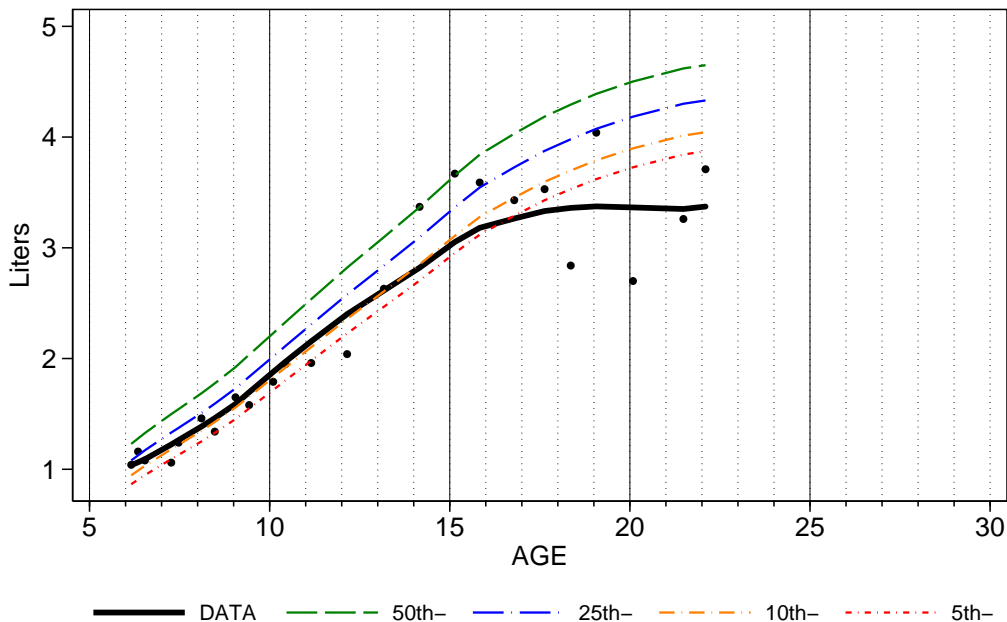

1902

**PATTERN OF GROWTH/DECLINE (Check One)**

- ( 1 ) Normal Growth
- ( 2 ) Normal Growth, Early Decline
- ( 3 ) Reduced Growth
- ( 4 ) Reduced Growth, Early Decline
- ( 9 ) Undetermined Pattern
- ( 8 ) Undetermined - not enough data

Maximum lung growth attained: ( 1 ) Yes ( 0 ) No

Plateau started: ( 2 ) No plateau ( 1 ) Yes ( 0 ) No

Decline started: ( 1 ) Yes ( 0 ) No

AGE AT each of the following periods (use '99' if N/A):

Maximum Lung Growth: \_\_\_\_ . \_\_\_\_

Start of Plateau: \_\_\_\_ . \_\_\_\_

Start of Decline: \_\_\_\_ . \_\_\_\_

### Pre-BD FEV1 Data and Percentiles: 1903

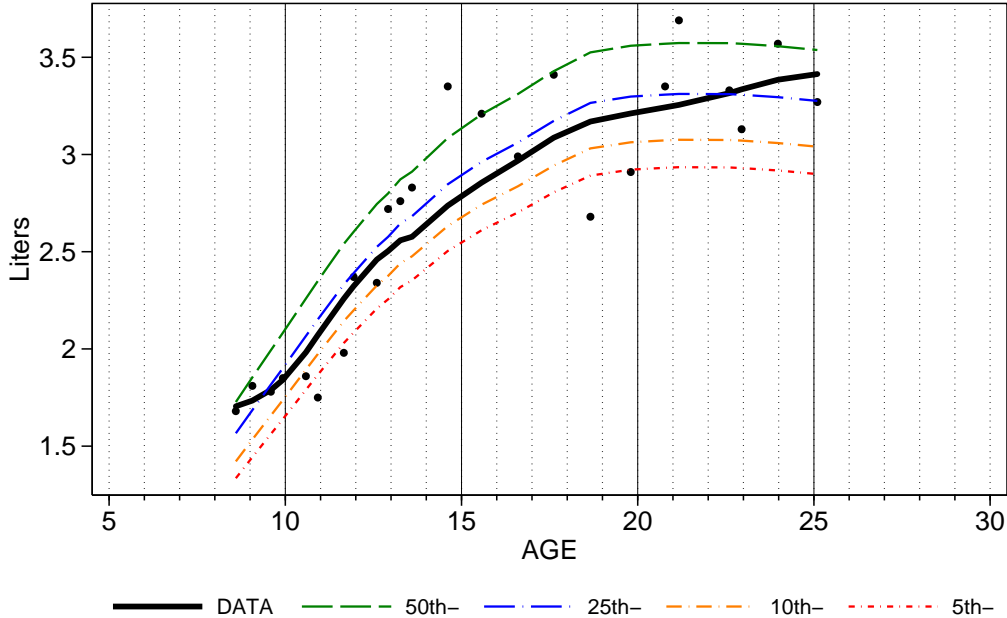

1903

**PATTERN OF GROWTH/DECLINE (Check One)**

- ( 1) Normal Growth
- ( 2) Normal Growth, Early Decline
- ( 3) Reduced Growth
- ( 4) Reduced Growth, Early Decline
- ( 9) Undetermined Pattern
- ( 8) Undetermined - not enough data

Maximum lung growth attained: ( 1) Yes ( 0) No

Plateau started: ( 2) No plateau ( 1) Yes ( 0) No

Decline started: ( 1) Yes ( 0) No

AGE AT each of the following periods (use '99' if N/A):

Maximum Lung Growth: \_\_\_\_ . \_\_\_\_

Start of Plateau: \_\_\_\_ . \_\_\_\_

Start of Decline: \_\_\_\_ . \_\_\_\_

### Pre-BD FEV1 Data and Percentiles: 1908

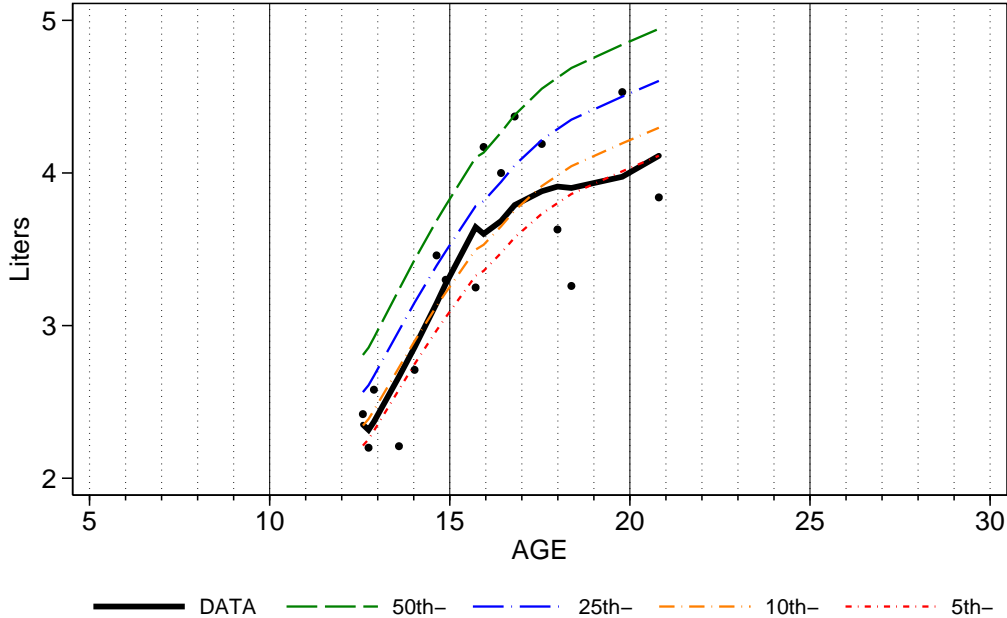

1908

**PATTERN OF GROWTH/DECLINE (Check One)**

- ( 1) Normal Growth
- ( 2) Normal Growth, Early Decline
- ( 3) Reduced Growth
- ( 4) Reduced Growth, Early Decline
- ( 9) Undetermined Pattern
- ( 8) Undetermined - not enough data

Maximum lung growth attained: ( 1) Yes ( 0) No

Plateau started: ( 2) No plateau ( 1) Yes ( 0) No

Decline started: ( 1) Yes ( 0) No

AGE AT each of the following periods (use '99' if N/A):

Maximum Lung Growth: \_\_\_\_ . \_\_\_\_

Start of Plateau: \_\_\_\_ . \_\_\_\_

Start of Decline: \_\_\_\_ . \_\_\_\_

### Pre-BD FEV1 Data and Percentiles: 1922

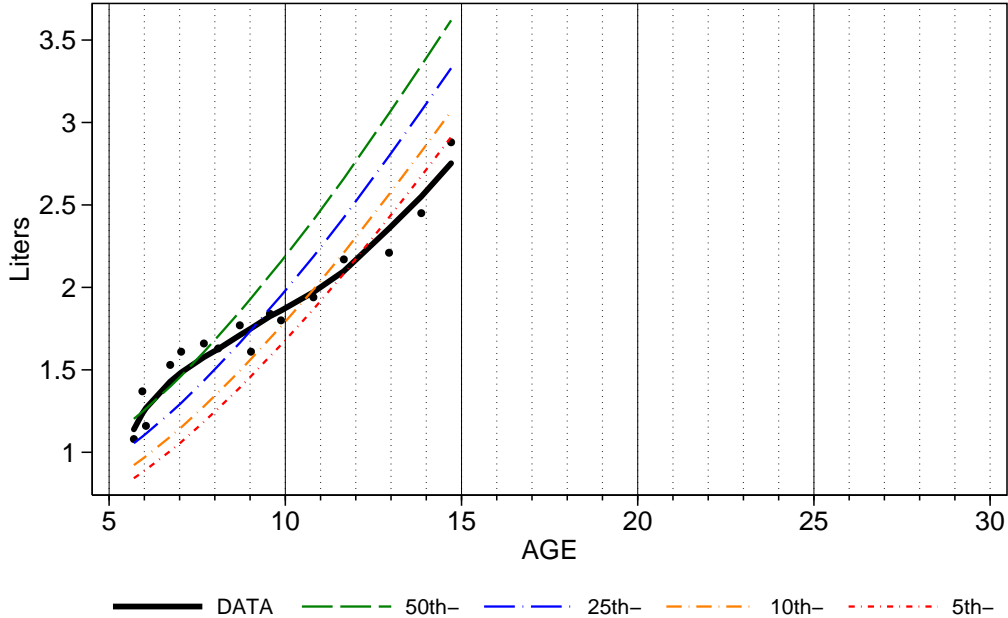

1922

**PATTERN OF GROWTH/DECLINE (Check One)**

- ( 1) Normal Growth
- ( 2) Normal Growth, Early Decline
- ( 3) Reduced Growth
- ( 4) Reduced Growth, Early Decline
- ( 9) Undetermined Pattern
- ( 8) Undetermined - not enough data

Maximum lung growth attained: ( 1) Yes ( 0) No

Plateau started: ( 2) No plateau ( 1) Yes ( 0) No

Decline started: ( 1) Yes ( 0) No

AGE AT each of the following periods (use '99' if N/A):

Maximum Lung Growth: \_\_\_\_ . \_\_\_\_

Start of Plateau: \_\_\_\_ . \_\_\_\_

Start of Decline: \_\_\_\_ . \_\_\_\_

### Pre-BD FEV1 Data and Percentiles: 1923

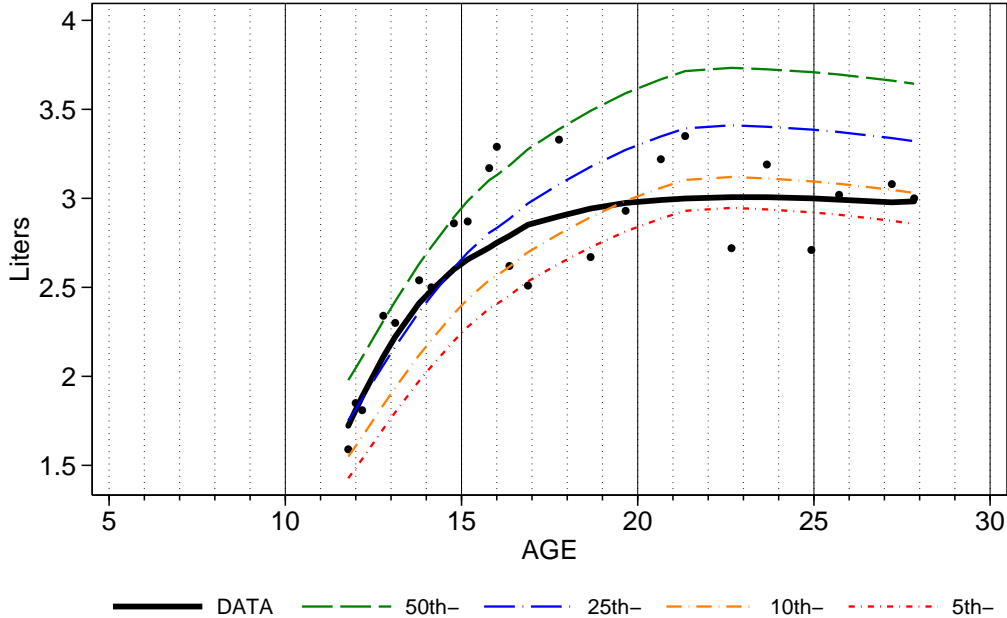

1923

**PATTERN OF GROWTH/DECLINE (Check One)**

- ( 1) Normal Growth
- ( 2) Normal Growth, Early Decline
- ( 3) Reduced Growth
- ( 4) Reduced Growth, Early Decline
- ( 9) Undetermined Pattern
- ( 8) Undetermined - not enough data

Maximum lung growth attained: ( 1) Yes ( 0) No

Plateau started: ( 2) No plateau ( 1) Yes ( 0) No

Decline started: ( 1) Yes ( 0) No

AGE AT each of the following periods (use '99' if N/A):

Maximum Lung Growth: \_\_\_\_ . \_\_\_\_

Start of Plateau: \_\_\_\_ . \_\_\_\_

Start of Decline: \_\_\_\_ . \_\_\_\_

### Pre-BD FEV1 Data and Percentiles: 1927

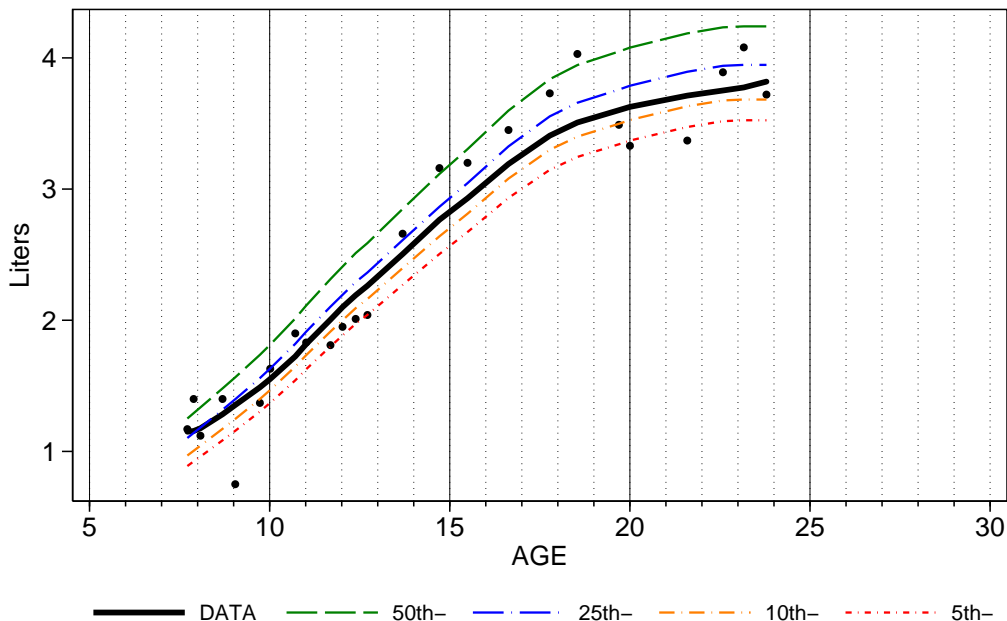

1927

**PATTERN OF GROWTH/DECLINE (Check One)**

- ( 1 ) Normal Growth
- ( 2 ) Normal Growth, Early Decline
- ( 3 ) Reduced Growth
- ( 4 ) Reduced Growth, Early Decline
- ( 9 ) Undetermined Pattern
- ( 8 ) Undetermined - not enough data

Maximum lung growth attained: ( 1 ) Yes ( 0 ) No

Plateau started: ( 2 ) No plateau ( 1 ) Yes ( 0 ) No

Decline started: ( 1 ) Yes ( 0 ) No

AGE AT each of the following periods (use '99' if N/A):

Maximum Lung Growth: \_\_\_\_ . \_\_\_\_

Start of Plateau: \_\_\_\_ . \_\_\_\_

Start of Decline: \_\_\_\_ . \_\_\_\_

### Pre-BD FEV1 Data and Percentiles: 1928

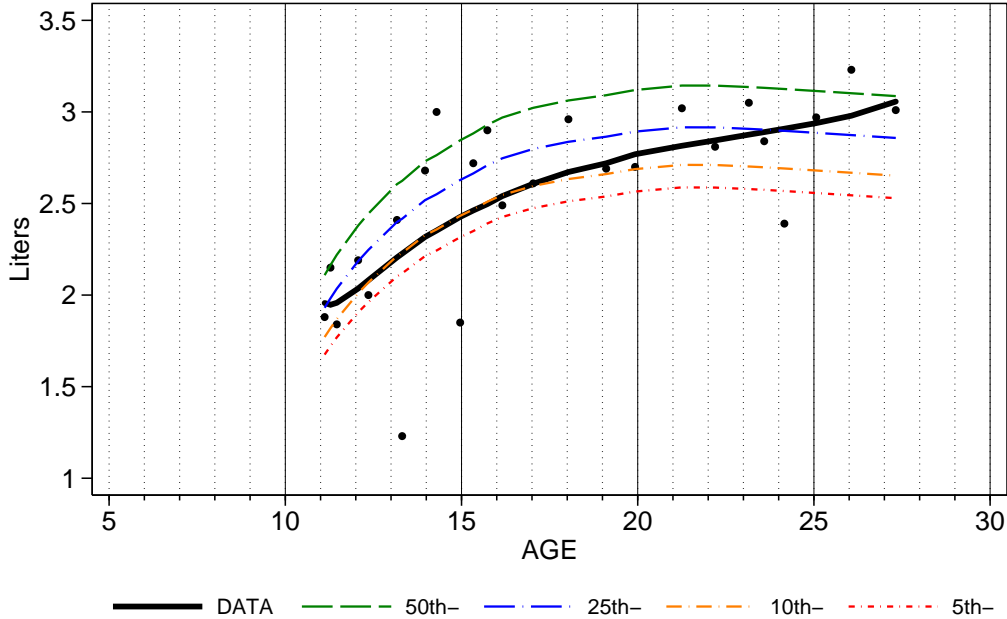

1928

**PATTERN OF GROWTH/DECLINE (Check One)**

- ( 1) Normal Growth
- ( 2) Normal Growth, Early Decline
- ( 3) Reduced Growth
- ( 4) Reduced Growth, Early Decline
- ( 9) Undetermined Pattern
- ( 8) Undetermined - not enough data

Maximum lung growth attained: ( 1) Yes ( 0) No

Plateau started: ( 2) No plateau ( 1) Yes ( 0) No

Decline started: ( 1) Yes ( 0) No

AGE AT each of the following periods (use '99' if N/A):

Maximum Lung Growth: \_\_\_\_ . \_\_\_\_

Start of Plateau: \_\_\_\_ . \_\_\_\_

Start of Decline: \_\_\_\_ . \_\_\_\_



### Pre-BD FEV1 Data and Percentiles: 1931

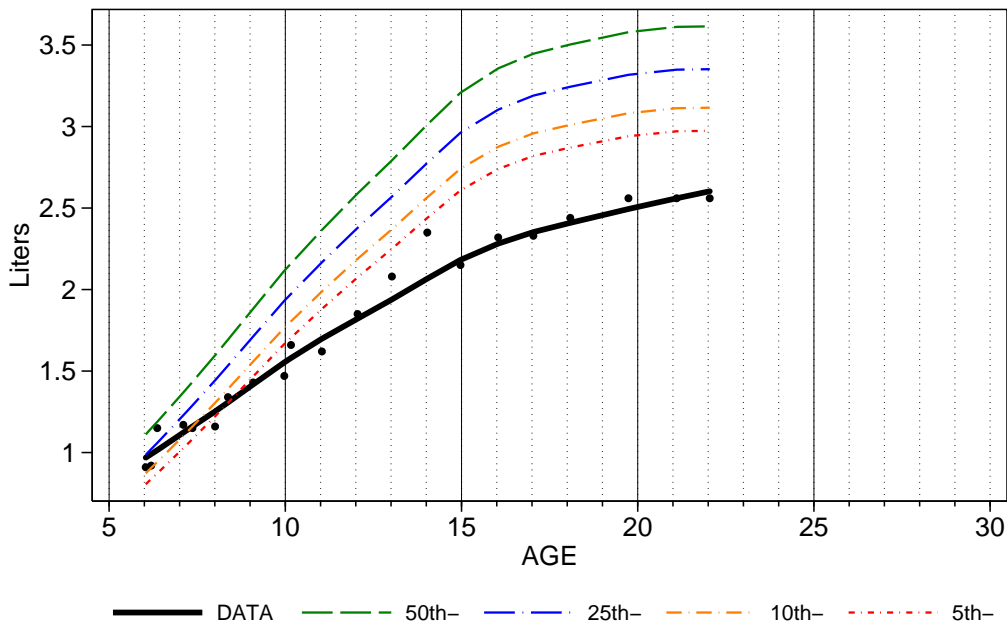

1931

**PATTERN OF GROWTH/DECLINE (Check One)**

- ( 1 ) Normal Growth
- ( 2 ) Normal Growth, Early Decline
- ( 3 ) Reduced Growth
- ( 4 ) Reduced Growth, Early Decline
- ( 9 ) Undetermined Pattern
- ( 8 ) Undetermined - not enough data

Maximum lung growth attained: ( 1 ) Yes ( 0 ) No

Plateau started: ( 2 ) No plateau ( 1 ) Yes ( 0 ) No

Decline started: ( 1 ) Yes ( 0 ) No

AGE AT each of the following periods (use '99' if N/A):

Maximum Lung Growth: \_\_\_\_ . \_\_\_\_

Start of Plateau: \_\_\_\_ . \_\_\_\_

Start of Decline: \_\_\_\_ . \_\_\_\_

### Pre-BD FEV1 Data and Percentiles: 1934

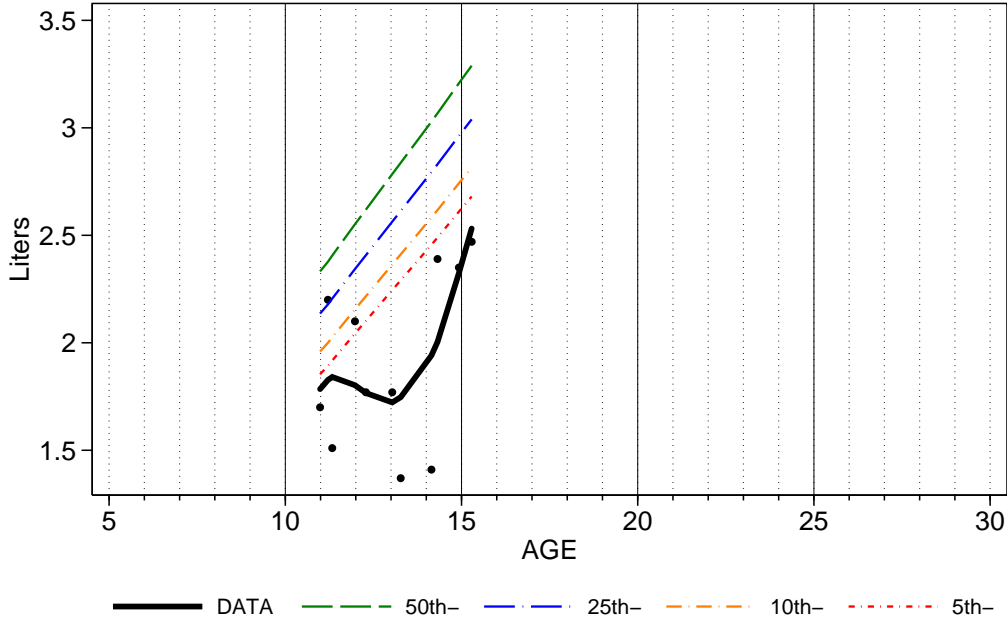

1934

**PATTERN OF GROWTH/DECLINE (Check One)**

- ( 1 ) Normal Growth
- ( 2 ) Normal Growth, Early Decline
- ( 3 ) Reduced Growth
- ( 4 ) Reduced Growth, Early Decline
- ( 9 ) Undetermined Pattern
- ( 8 ) Undetermined - not enough data

Maximum lung growth attained: ( 1 ) Yes ( 0 ) No

Plateau started: ( 2 ) No plateau ( 1 ) Yes ( 0 ) No

Decline started: ( 1 ) Yes ( 0 ) No

AGE AT each of the following periods (use '99' if N/A):

Maximum Lung Growth: \_\_\_\_ . \_\_\_\_

Start of Plateau: \_\_\_\_ . \_\_\_\_

Start of Decline: \_\_\_\_ . \_\_\_\_

### Pre-BD FEV1 Data and Percentiles: 1935

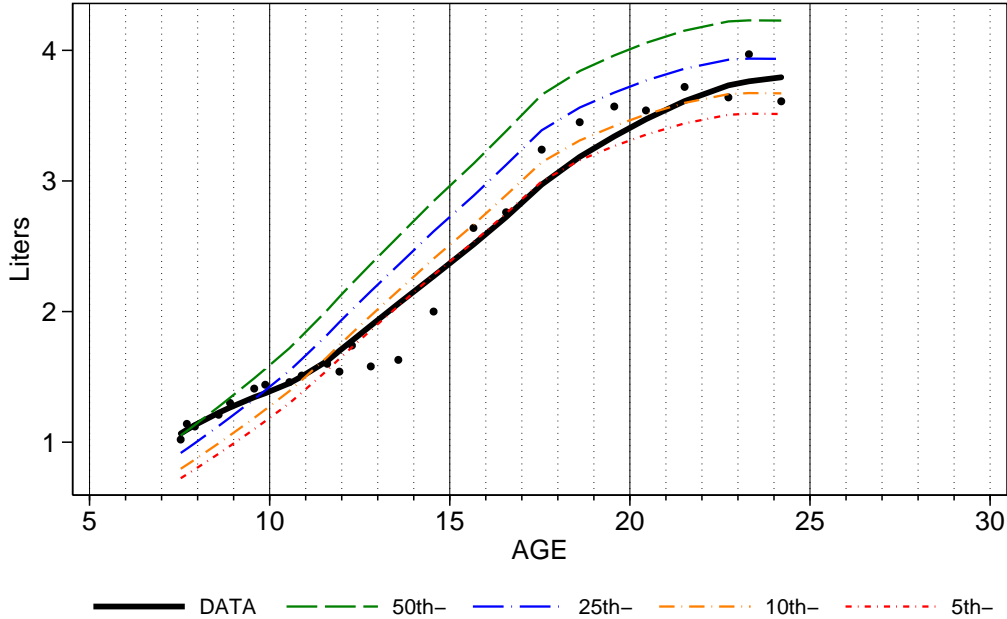

1935

**PATTERN OF GROWTH/DECLINE (Check One)**

- ( 1) Normal Growth
- ( 2) Normal Growth, Early Decline
- ( 3) Reduced Growth
- ( 4) Reduced Growth, Early Decline
- ( 9) Undetermined Pattern
- ( 8) Undetermined - not enough data

Maximum lung growth attained: ( 1) Yes ( 0) No

Plateau started: ( 2) No plateau ( 1) Yes ( 0) No

Decline started: ( 1) Yes ( 0) No

AGE AT each of the following periods (use '99' if N/A):

Maximum Lung Growth: \_\_\_\_ . \_\_\_\_

Start of Plateau: \_\_\_\_ . \_\_\_\_

Start of Decline: \_\_\_\_ . \_\_\_\_

### Pre-BD FEV1 Data and Percentiles: 1939

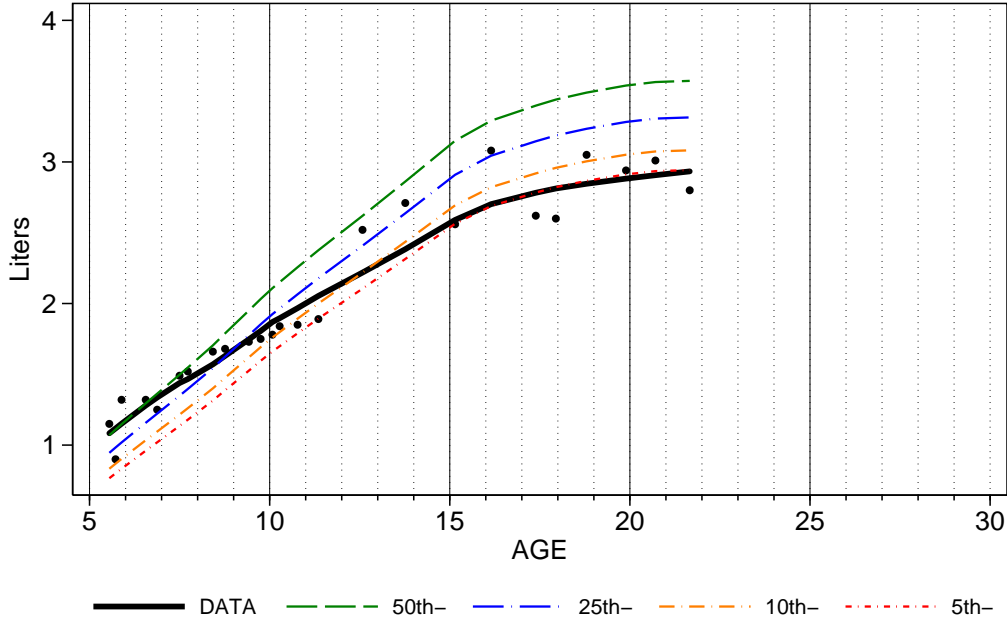

1939

**PATTERN OF GROWTH/DECLINE (Check One)**

- ( 1 ) Normal Growth
- ( 2 ) Normal Growth, Early Decline
- ( 3 ) Reduced Growth
- ( 4 ) Reduced Growth, Early Decline
- ( 9 ) Undetermined Pattern
- ( 8 ) Undetermined - not enough data

Maximum lung growth attained: ( 1 ) Yes ( 0 ) No

Plateau started: ( 2 ) No plateau ( 1 ) Yes ( 0 ) No

Decline started: ( 1 ) Yes ( 0 ) No

AGE AT each of the following periods (use '99' if N/A):

Maximum Lung Growth: \_\_\_\_ . \_\_\_\_

Start of Plateau: \_\_\_\_ . \_\_\_\_

Start of Decline: \_\_\_\_ . \_\_\_\_

### Pre-BD FEV1 Data and Percentiles: 1941

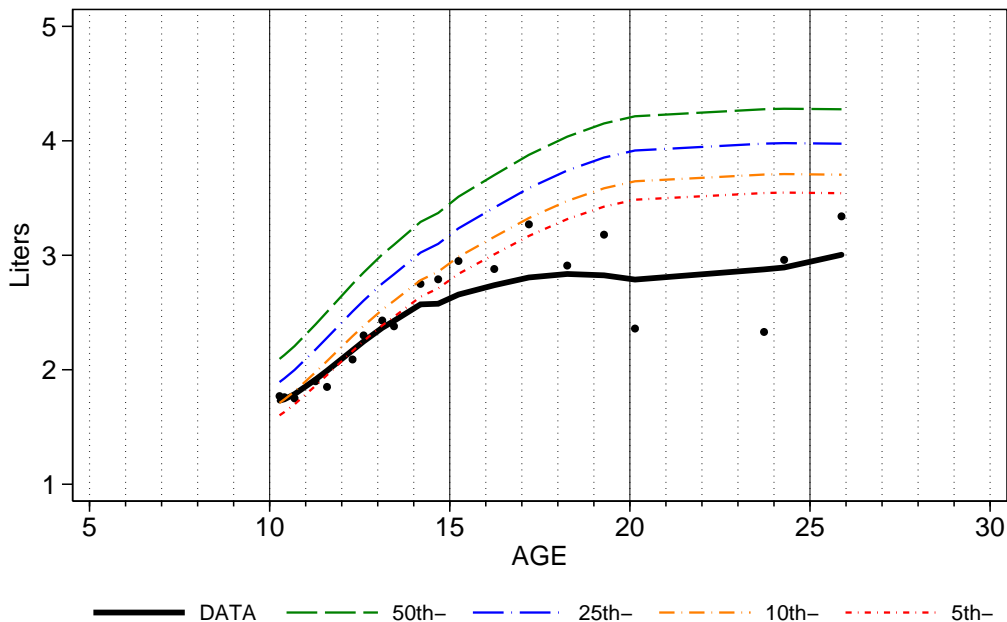

1941

**PATTERN OF GROWTH/DECLINE (Check One)**

- ( 1 ) Normal Growth
- ( 2 ) Normal Growth, Early Decline
- ( 3 ) Reduced Growth
- ( 4 ) Reduced Growth, Early Decline
- ( 9 ) Undetermined Pattern
- ( 8 ) Undetermined - not enough data

Maximum lung growth attained: ( 1 ) Yes ( 0 ) No

Plateau started: ( 2 ) No plateau ( 1 ) Yes ( 0 ) No

Decline started: ( 1 ) Yes ( 0 ) No

AGE AT each of the following periods (use '99' if N/A):

Maximum Lung Growth: \_\_\_\_ . \_\_\_\_

Start of Plateau: \_\_\_\_ . \_\_\_\_

Start of Decline: \_\_\_\_ . \_\_\_\_

### Pre-BD FEV1 Data and Percentiles: 1942

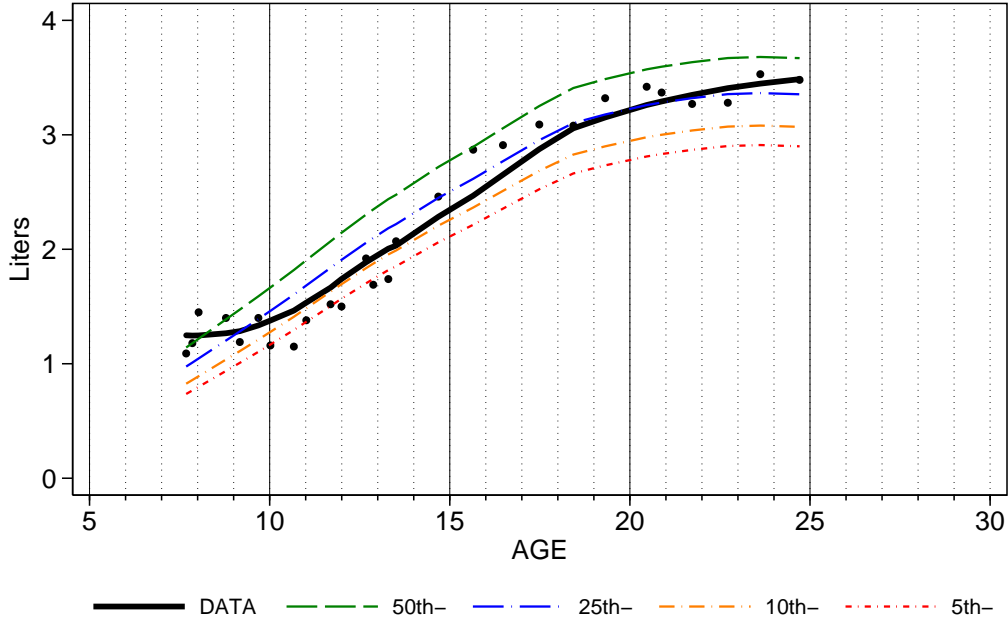

1942

**PATTERN OF GROWTH/DECLINE (Check One)**

- ( 1) Normal Growth
- ( 2) Normal Growth, Early Decline
- ( 3) Reduced Growth
- ( 4) Reduced Growth, Early Decline
- ( 9) Undetermined Pattern
- ( 8) Undetermined - not enough data

Maximum lung growth attained: ( 1) Yes ( 0) No

Plateau started: ( 2) No plateau ( 1) Yes ( 0) No

Decline started: ( 1) Yes ( 0) No

AGE AT each of the following periods (use '99' if N/A):

Maximum Lung Growth: \_\_\_\_ . \_\_\_\_

Start of Plateau: \_\_\_\_ . \_\_\_\_

Start of Decline: \_\_\_\_ . \_\_\_\_

### Pre-BD FEV1 Data and Percentiles: 1965

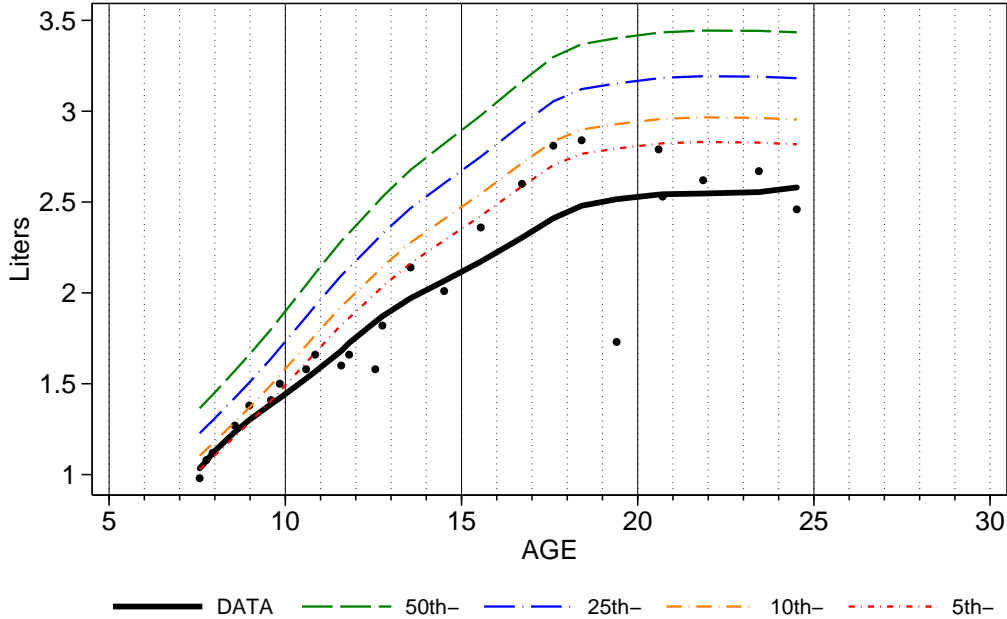

1965

**PATTERN OF GROWTH/DECLINE (Check One)**

- ( 1 ) Normal Growth
- ( 2 ) Normal Growth, Early Decline
- ( 3 ) Reduced Growth
- ( 4 ) Reduced Growth, Early Decline
- ( 9 ) Undetermined Pattern
- ( 8 ) Undetermined - not enough data

Maximum lung growth attained: ( 1 ) Yes ( 0 ) No

Plateau started: ( 2 ) No plateau ( 1 ) Yes ( 0 ) No

Decline started: ( 1 ) Yes ( 0 ) No

AGE AT each of the following periods (use '99' if N/A):

Maximum Lung Growth: \_\_\_\_ . \_\_\_\_

Start of Plateau: \_\_\_\_ . \_\_\_\_

Start of Decline: \_\_\_\_ . \_\_\_\_

### Pre-BD FEV1 Data and Percentiles: 1973

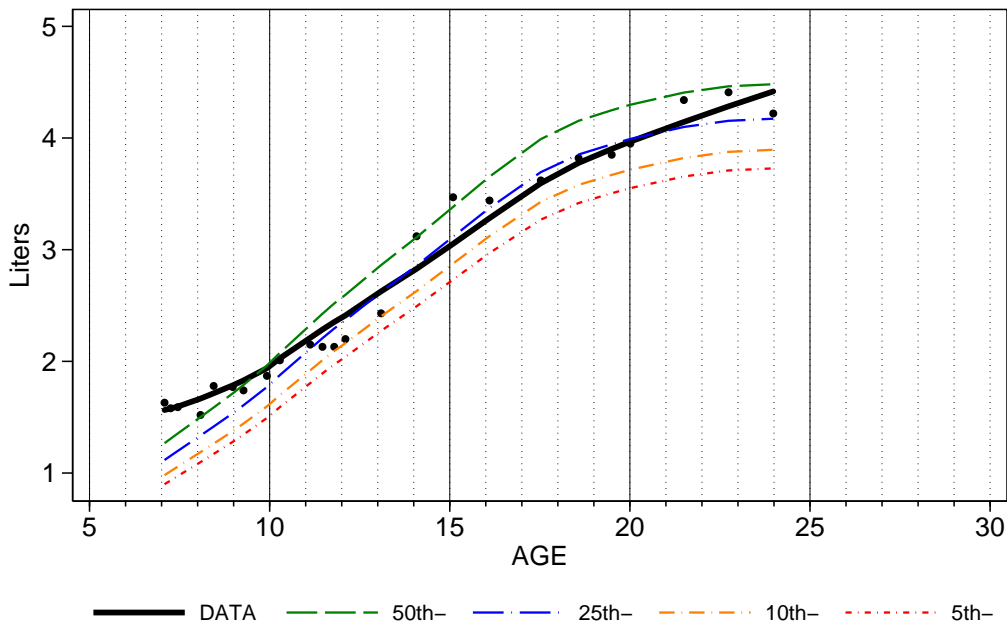

1973

**PATTERN OF GROWTH/DECLINE (Check One)**

- ( 1 ) Normal Growth
- ( 2 ) Normal Growth, Early Decline
- ( 3 ) Reduced Growth
- ( 4 ) Reduced Growth, Early Decline
- ( 9 ) Undetermined Pattern
- ( 8 ) Undetermined - not enough data

Maximum lung growth attained: ( 1 ) Yes ( 0 ) No

Plateau started: ( 2 ) No plateau ( 1 ) Yes ( 0 ) No

Decline started: ( 1 ) Yes ( 0 ) No

AGE AT each of the following periods (use '99' if N/A):

Maximum Lung Growth: \_\_\_\_ . \_\_\_\_

Start of Plateau: \_\_\_\_ . \_\_\_\_

Start of Decline: \_\_\_\_ . \_\_\_\_



### Pre-BD FEV1 Data and Percentiles: 1980

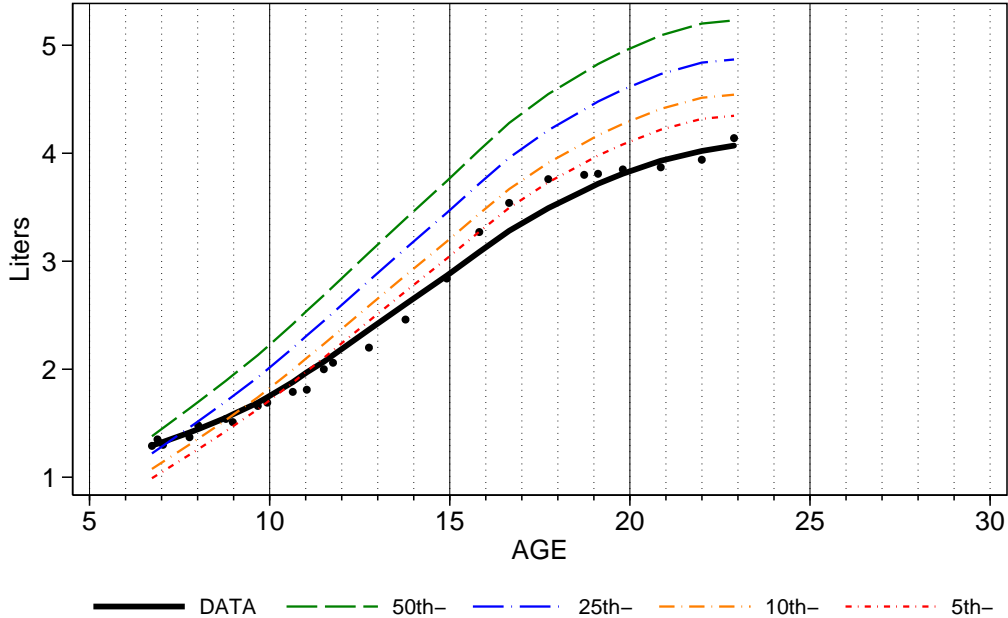

1980

**PATTERN OF GROWTH/DECLINE (Check One)**

- ( 1) Normal Growth
- ( 2) Normal Growth, Early Decline
- ( 3) Reduced Growth
- ( 4) Reduced Growth, Early Decline
- ( 9) Undetermined Pattern
- ( 8) Undetermined - not enough data

Maximum lung growth attained: ( 1) Yes ( 0) No

Plateau started: ( 2) No plateau ( 1) Yes ( 0) No

Decline started: ( 1) Yes ( 0) No

AGE AT each of the following periods (use '99' if N/A):

Maximum Lung Growth: \_\_\_\_ . \_\_\_\_

Start of Plateau: \_\_\_\_ . \_\_\_\_

Start of Decline: \_\_\_\_ . \_\_\_\_

### Pre-BD FEV1 Data and Percentiles: 1982

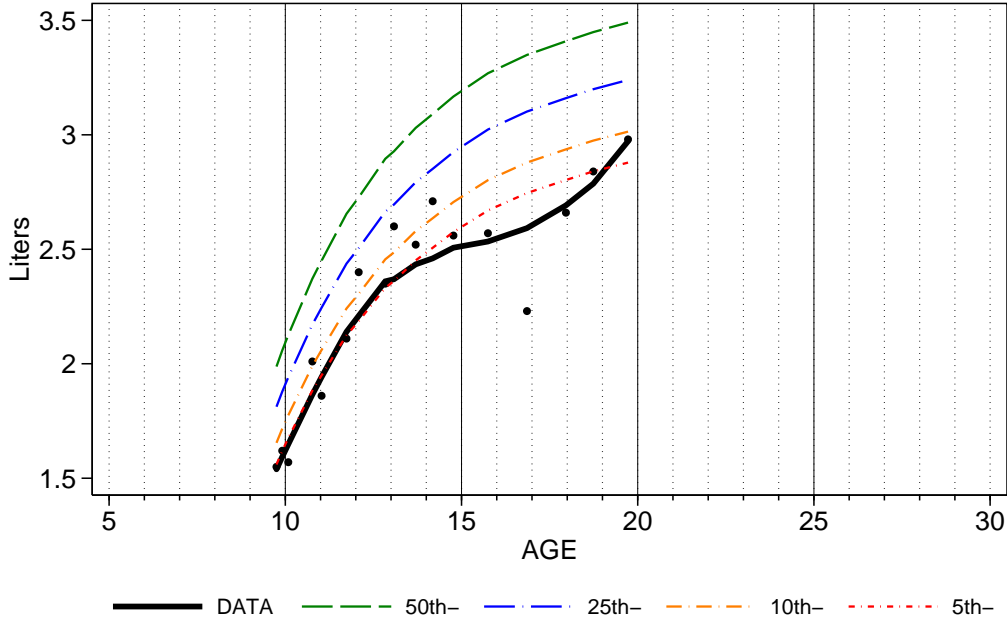

1982

**PATTERN OF GROWTH/DECLINE (Check One)**

- ( 1) Normal Growth
- ( 2) Normal Growth, Early Decline
- ( 3) Reduced Growth
- ( 4) Reduced Growth, Early Decline
- ( 9) Undetermined Pattern
- ( 8) Undetermined - not enough data

Maximum lung growth attained: ( 1) Yes ( 0) No

Plateau started: ( 2) No plateau ( 1) Yes ( 0) No

Decline started: ( 1) Yes ( 0) No

AGE AT each of the following periods (use '99' if N/A):

Maximum Lung Growth: \_\_\_\_ . \_\_\_\_

Start of Plateau: \_\_\_\_ . \_\_\_\_

Start of Decline: \_\_\_\_ . \_\_\_\_

### Pre-BD FEV1 Data and Percentiles: 1989

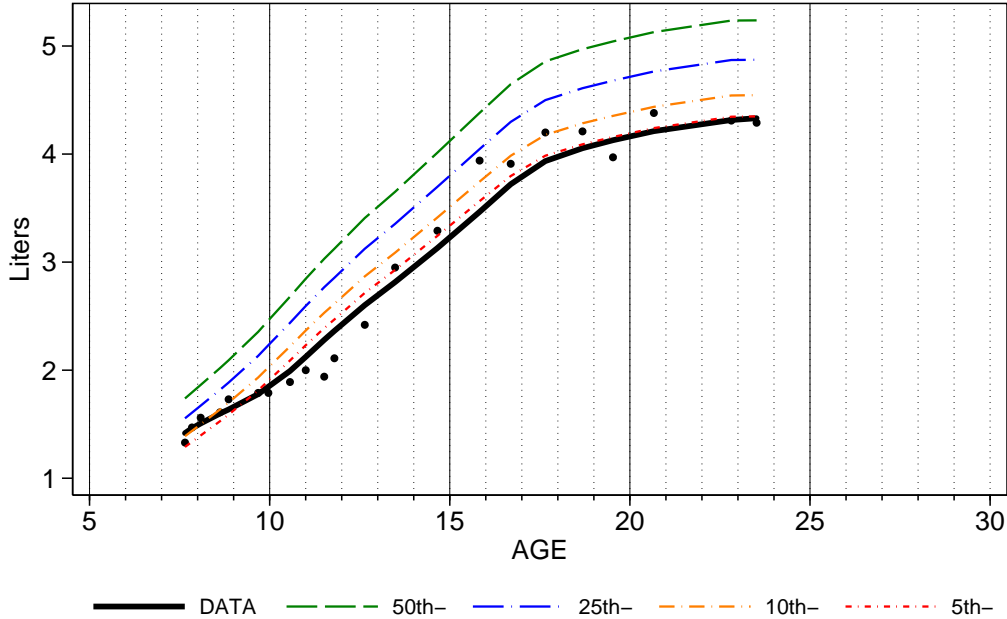

1989

**PATTERN OF GROWTH/DECLINE (Check One)**

- ( 1) Normal Growth
- ( 2) Normal Growth, Early Decline
- ( 3) Reduced Growth
- ( 4) Reduced Growth, Early Decline
- ( 9) Undetermined Pattern
- ( 8) Undetermined - not enough data

Maximum lung growth attained: ( 1) Yes ( 0) No

Plateau started: ( 2) No plateau ( 1) Yes ( 0) No

Decline started: ( 1) Yes ( 0) No

AGE AT each of the following periods (use '99' if N/A):

Maximum Lung Growth: \_\_\_\_ . \_\_\_\_

Start of Plateau: \_\_\_\_ . \_\_\_\_

Start of Decline: \_\_\_\_ . \_\_\_\_

### Pre-BD FEV1 Data and Percentiles: 1991

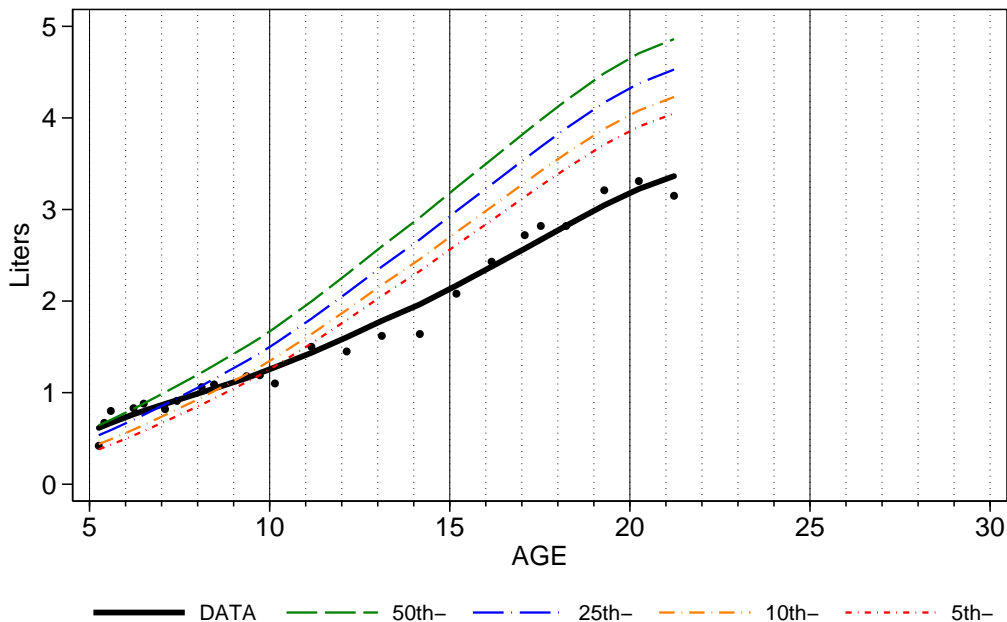

1991

**PATTERN OF GROWTH/DECLINE (Check One)**

- ( 1 ) Normal Growth
- ( 2 ) Normal Growth, Early Decline
- ( 3 ) Reduced Growth
- ( 4 ) Reduced Growth, Early Decline
- ( 9 ) Undetermined Pattern
- ( 8 ) Undetermined - not enough data

Maximum lung growth attained: ( 1 ) Yes ( 0 ) No

Plateau started: ( 2 ) No plateau ( 1 ) Yes ( 0 ) No

Decline started: ( 1 ) Yes ( 0 ) No

AGE AT each of the following periods (use '99' if N/A):

Maximum Lung Growth: \_\_\_\_ . \_\_\_\_

Start of Plateau: \_\_\_\_ . \_\_\_\_

Start of Decline: \_\_\_\_ . \_\_\_\_

### Pre-BD FEV1 Data and Percentiles: 1996

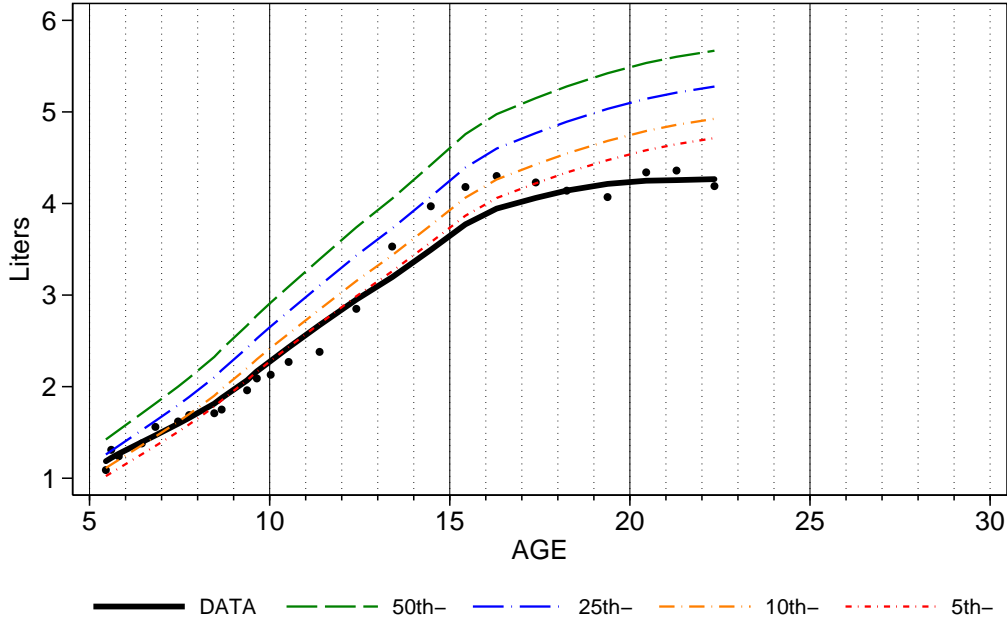

1996

**PATTERN OF GROWTH/DECLINE (Check One)**

- ( 1) Normal Growth
- ( 2) Normal Growth, Early Decline
- ( 3) Reduced Growth
- ( 4) Reduced Growth, Early Decline
- ( 9) Undetermined Pattern
- ( 8) Undetermined - not enough data

Maximum lung growth attained: ( 1) Yes ( 0) No

Plateau started: ( 2) No plateau ( 1) Yes ( 0) No

Decline started: ( 1) Yes ( 0) No

AGE AT each of the following periods (use '99' if N/A):

Maximum Lung Growth: \_\_\_\_ . \_\_\_\_

Start of Plateau: \_\_\_\_ . \_\_\_\_

Start of Decline: \_\_\_\_ . \_\_\_\_

### Pre-BD FEV1 Data and Percentiles: 2004

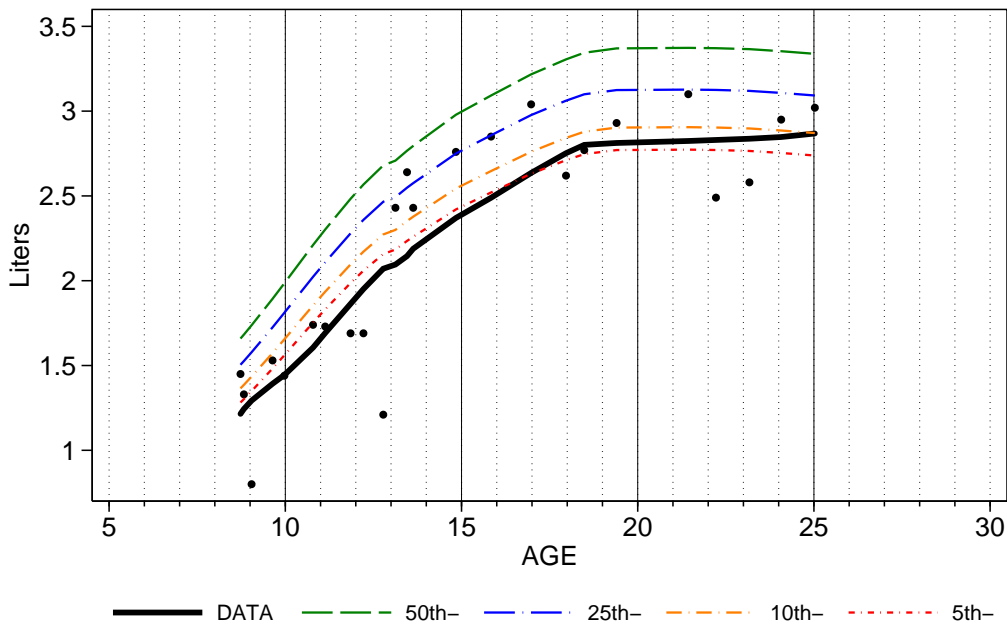

2004

**PATTERN OF GROWTH/DECLINE (Check One)**

- ( 1 ) Normal Growth
- ( 2 ) Normal Growth, Early Decline
- ( 3 ) Reduced Growth
- ( 4 ) Reduced Growth, Early Decline
- ( 9 ) Undetermined Pattern
- ( 8 ) Undetermined - not enough data

Maximum lung growth attained: ( 1 ) Yes ( 0 ) No

Plateau started: ( 2 ) No plateau ( 1 ) Yes ( 0 ) No

Decline started: ( 1 ) Yes ( 0 ) No

AGE AT each of the following periods (use '99' if N/A):

Maximum Lung Growth: \_\_\_\_ . \_\_\_\_

Start of Plateau: \_\_\_\_ . \_\_\_\_

Start of Decline: \_\_\_\_ . \_\_\_\_

### Pre-BD FEV1 Data and Percentiles: 2018

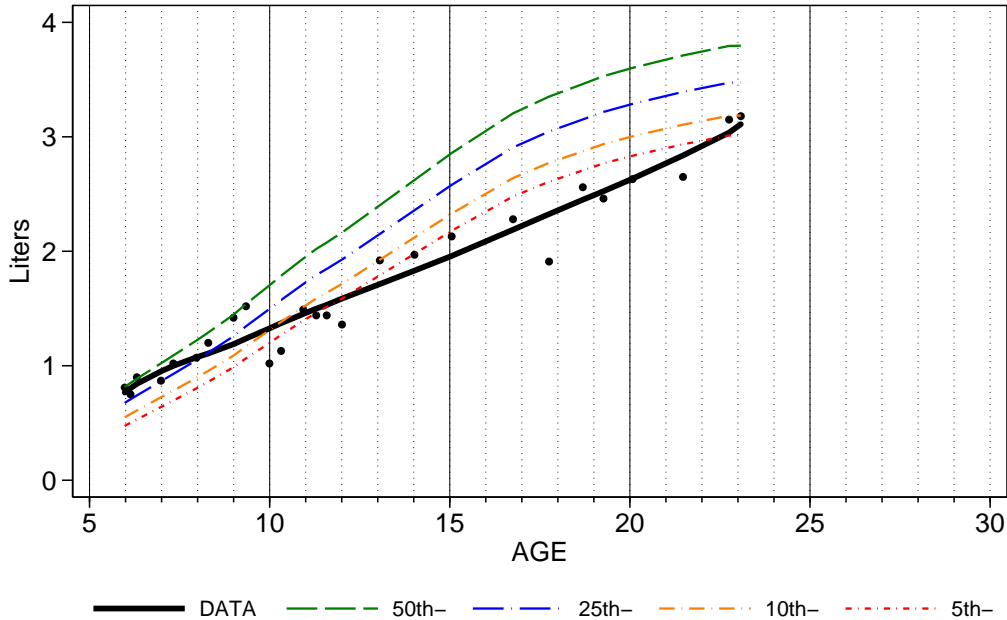

2018

**PATTERN OF GROWTH/DECLINE (Check One)**

- ( 1) Normal Growth
- ( 2) Normal Growth, Early Decline
- ( 3) Reduced Growth
- ( 4) Reduced Growth, Early Decline
- ( 9) Undetermined Pattern
- ( 8) Undetermined - not enough data

Maximum lung growth attained: ( 1) Yes ( 0) No

Plateau started: ( 2) No plateau ( 1) Yes ( 0) No

Decline started: ( 1) Yes ( 0) No

AGE AT each of the following periods (use '99' if N/A):

Maximum Lung Growth: \_\_\_\_ . \_\_\_\_

Start of Plateau: \_\_\_\_ . \_\_\_\_

Start of Decline: \_\_\_\_ . \_\_\_\_

### Pre-BD FEV1 Data and Percentiles: 2019

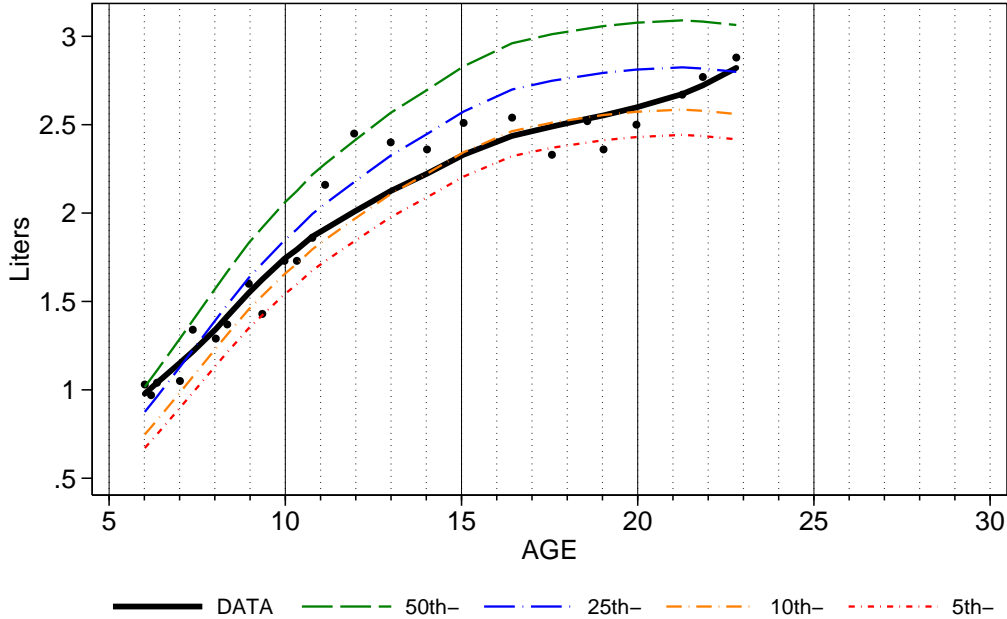

2019

**PATTERN OF GROWTH/DECLINE (Check One)**

- ( 1) Normal Growth
- ( 2) Normal Growth, Early Decline
- ( 3) Reduced Growth
- ( 4) Reduced Growth, Early Decline
- ( 9) Undetermined Pattern
- ( 8) Undetermined - not enough data

Maximum lung growth attained: ( 1) Yes ( 0) No

Plateau started: ( 2) No plateau ( 1) Yes ( 0) No

Decline started: ( 1) Yes ( 0) No

AGE AT each of the following periods (use '99' if N/A):

Maximum Lung Growth: \_\_\_\_ . \_\_\_\_

Start of Plateau: \_\_\_\_ . \_\_\_\_

Start of Decline: \_\_\_\_ . \_\_\_\_



### Pre-BD FEV1 Data and Percentiles: 2021

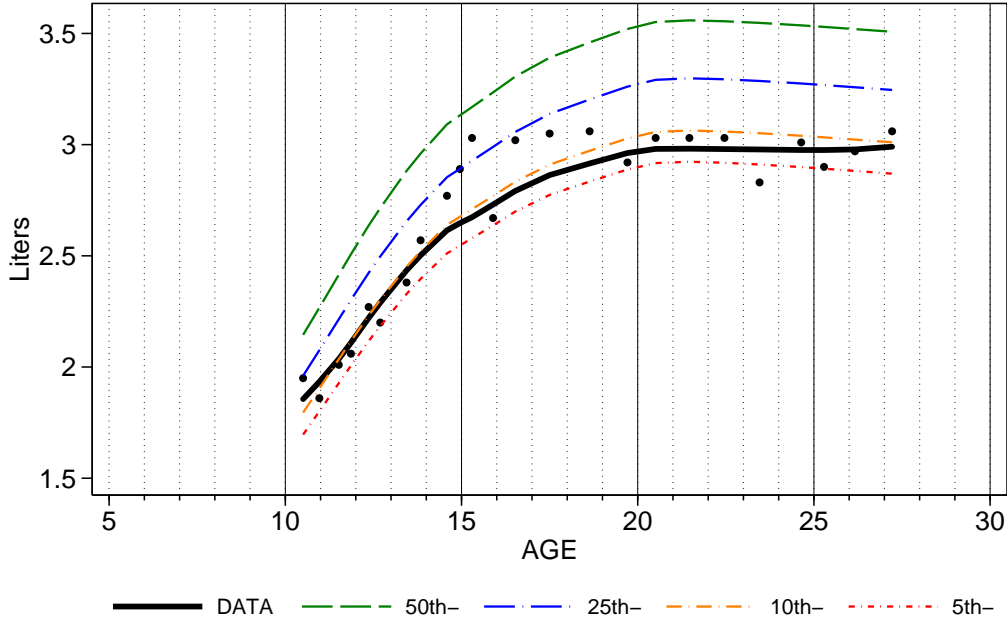

2021

**PATTERN OF GROWTH/DECLINE (Check One)**

- ( 1) Normal Growth
- ( 2) Normal Growth, Early Decline
- ( 3) Reduced Growth
- ( 4) Reduced Growth, Early Decline
- ( 9) Undetermined Pattern
- ( 8) Undetermined - not enough data

Maximum lung growth attained: ( 1) Yes ( 0) No

Plateau started: ( 2) No plateau ( 1) Yes ( 0) No

Decline started: ( 1) Yes ( 0) No

AGE AT each of the following periods (use '99' if N/A):

Maximum Lung Growth: \_\_\_\_ . \_\_\_\_

Start of Plateau: \_\_\_\_ . \_\_\_\_

Start of Decline: \_\_\_\_ . \_\_\_\_

### Pre-BD FEV1 Data and Percentiles: 2022

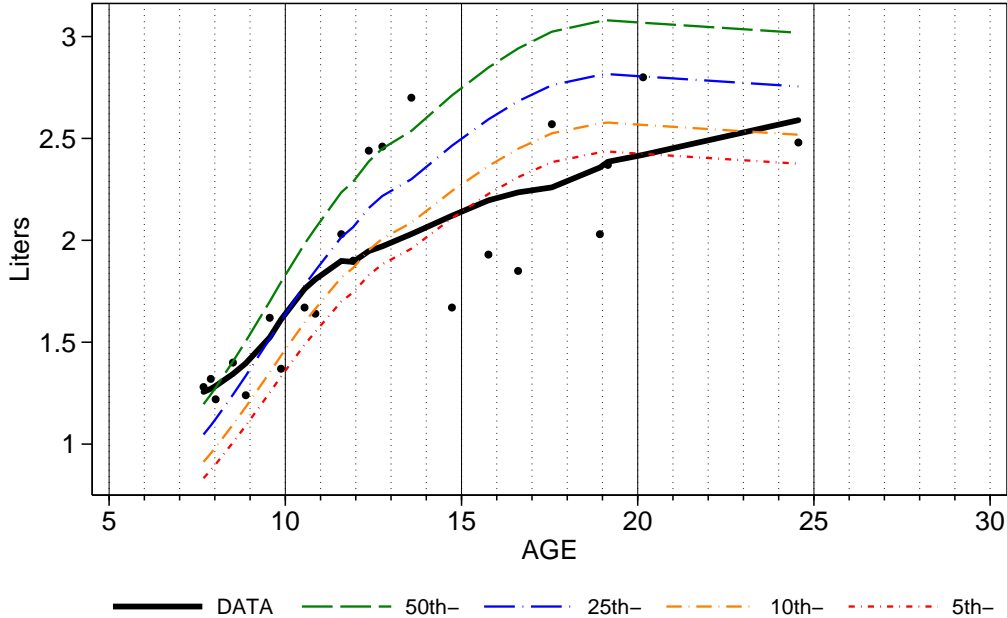

2022

**PATTERN OF GROWTH/DECLINE (Check One)**

- ( 1) Normal Growth
- ( 2) Normal Growth, Early Decline
- ( 3) Reduced Growth
- ( 4) Reduced Growth, Early Decline
- ( 9) Undetermined Pattern
- ( 8) Undetermined - not enough data

Maximum lung growth attained: ( 1) Yes ( 0) No

Plateau started: ( 2) No plateau ( 1) Yes ( 0) No

Decline started: ( 1) Yes ( 0) No

AGE AT each of the following periods (use '99' if N/A):

Maximum Lung Growth: \_\_\_\_ . \_\_\_\_

Start of Plateau: \_\_\_\_ . \_\_\_\_

Start of Decline: \_\_\_\_ . \_\_\_\_

### Pre-BD FEV1 Data and Percentiles: 2028

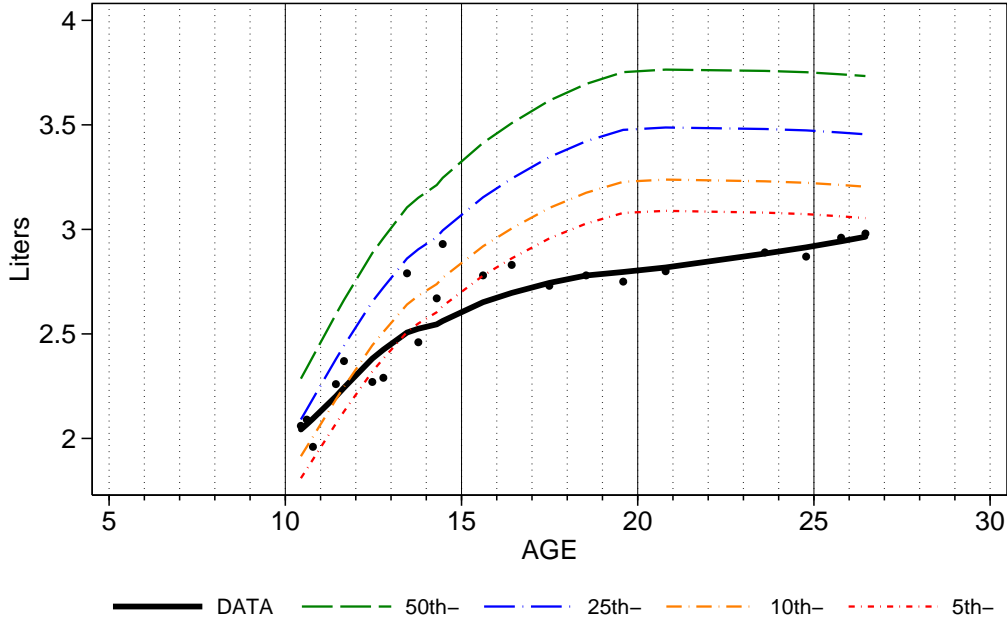

2028

**PATTERN OF GROWTH/DECLINE (Check One)**

- ( 1) Normal Growth
- ( 2) Normal Growth, Early Decline
- ( 3) Reduced Growth
- ( 4) Reduced Growth, Early Decline
- ( 9) Undetermined Pattern
- ( 8) Undetermined - not enough data

Maximum lung growth attained: ( 1) Yes ( 0) No

Plateau started: ( 2) No plateau ( 1) Yes ( 0) No

Decline started: ( 1) Yes ( 0) No

AGE AT each of the following periods (use '99' if N/A):

Maximum Lung Growth: \_\_\_\_ . \_\_\_\_

Start of Plateau: \_\_\_\_ . \_\_\_\_

Start of Decline: \_\_\_\_ . \_\_\_\_

### Pre-BD FEV1 Data and Percentiles: 2031

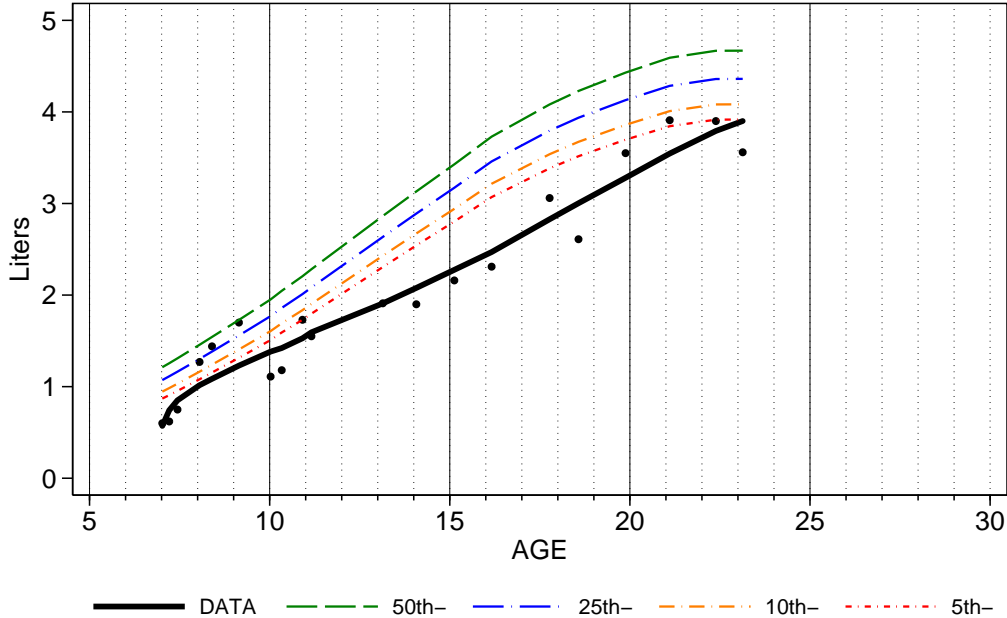

2031

**PATTERN OF GROWTH/DECLINE (Check One)**

- ( 1) Normal Growth
- ( 2) Normal Growth, Early Decline
- ( 3) Reduced Growth
- ( 4) Reduced Growth, Early Decline
- ( 9) Undetermined Pattern
- ( 8) Undetermined - not enough data

Maximum lung growth attained: ( 1) Yes ( 0) No

Plateau started: ( 2) No plateau ( 1) Yes ( 0) No

Decline started: ( 1) Yes ( 0) No

AGE AT each of the following periods (use '99' if N/A):

Maximum Lung Growth: \_\_\_\_ . \_\_\_\_

Start of Plateau: \_\_\_\_ . \_\_\_\_

Start of Decline: \_\_\_\_ . \_\_\_\_

### Pre-BD FEV1 Data and Percentiles: 2032

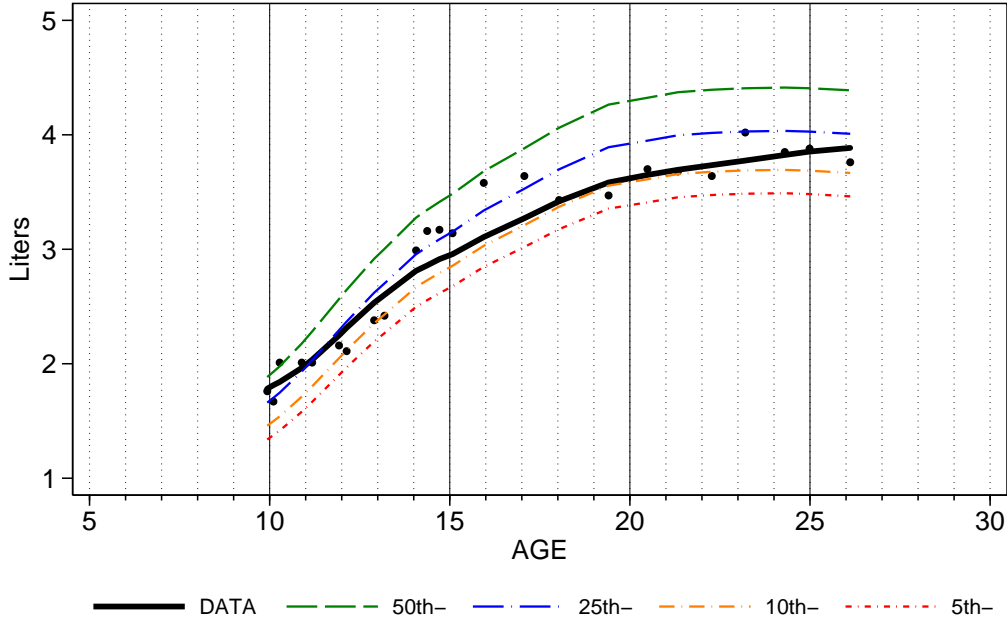

2032

**PATTERN OF GROWTH/DECLINE (Check One)**

- ( 1 ) Normal Growth
- ( 2 ) Normal Growth, Early Decline
- ( 3 ) Reduced Growth
- ( 4 ) Reduced Growth, Early Decline
- ( 9 ) Undetermined Pattern
- ( 8 ) Undetermined - not enough data

Maximum lung growth attained: ( 1 ) Yes ( 0 ) No

Plateau started: ( 2 ) No plateau ( 1 ) Yes ( 0 ) No

Decline started: ( 1 ) Yes ( 0 ) No

AGE AT each of the following periods (use '99' if N/A):

Maximum Lung Growth: \_\_\_\_ . \_\_\_\_

Start of Plateau: \_\_\_\_ . \_\_\_\_

Start of Decline: \_\_\_\_ . \_\_\_\_

### Pre-BD FEV1 Data and Percentiles: 2038

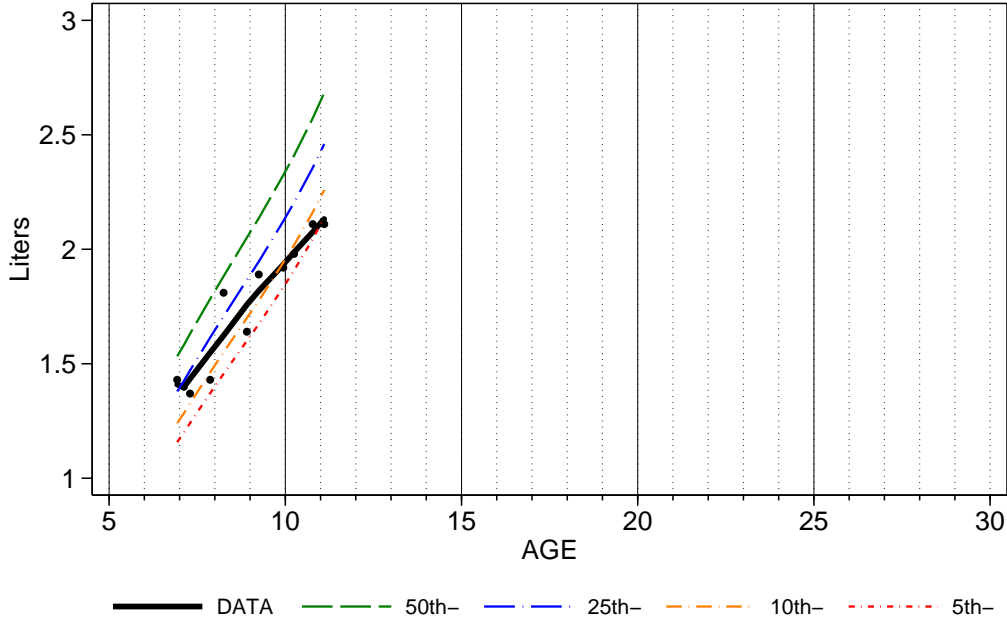

2038

**PATTERN OF GROWTH/DECLINE (Check One)**

- ( 1 ) Normal Growth
- ( 2 ) Normal Growth, Early Decline
- ( 3 ) Reduced Growth
- ( 4 ) Reduced Growth, Early Decline
- ( 9 ) Undetermined Pattern
- ( 8 ) Undetermined - not enough data

Maximum lung growth attained: ( 1 ) Yes ( 0 ) No

Plateau started: ( 2 ) No plateau ( 1 ) Yes ( 0 ) No

Decline started: ( 1 ) Yes ( 0 ) No

AGE AT each of the following periods (use '99' if N/A):

Maximum Lung Growth: \_\_\_\_ . \_\_\_\_

Start of Plateau: \_\_\_\_ . \_\_\_\_

Start of Decline: \_\_\_\_ . \_\_\_\_

### Pre-BD FEV1 Data and Percentiles: 2041

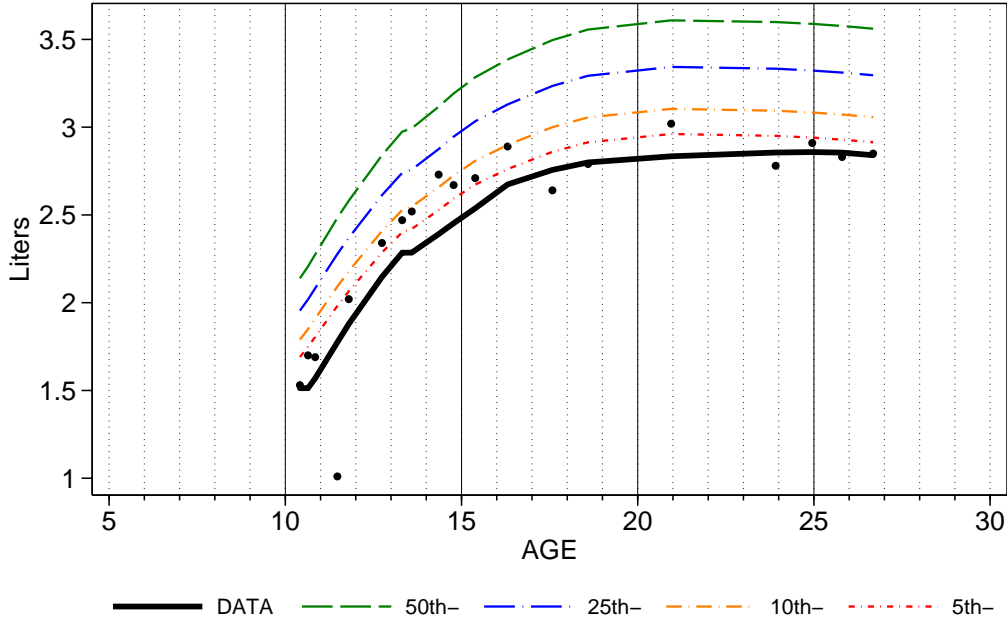

2041

**PATTERN OF GROWTH/DECLINE (Check One)**

- ( 1 ) Normal Growth
- ( 2 ) Normal Growth, Early Decline
- ( 3 ) Reduced Growth
- ( 4 ) Reduced Growth, Early Decline
- ( 9 ) Undetermined Pattern
- ( 8 ) Undetermined - not enough data

Maximum lung growth attained: ( 1 ) Yes ( 0 ) No

Plateau started: ( 2 ) No plateau ( 1 ) Yes ( 0 ) No

Decline started: ( 1 ) Yes ( 0 ) No

AGE AT each of the following periods (use '99' if N/A):

Maximum Lung Growth: \_\_\_\_ . \_\_\_\_

Start of Plateau: \_\_\_\_ . \_\_\_\_

Start of Decline: \_\_\_\_ . \_\_\_\_

### Pre-BD FEV1 Data and Percentiles: 1003

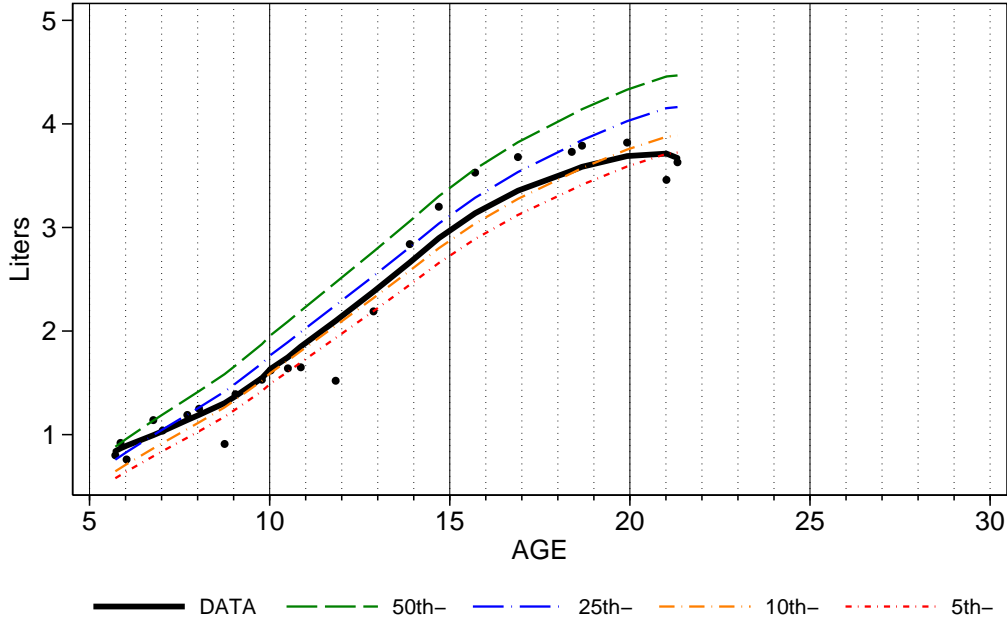

1003

**PATTERN OF GROWTH/DECLINE (Check One)**

- ( 1) Normal Growth
- ( 2) Normal Growth, Early Decline
- ( 3) Reduced Growth
- ( 4) Reduced Growth, Early Decline
- ( 9) Undetermined Pattern
- ( 8) Undetermined - not enough data

Maximum lung growth attained: ( 1) Yes ( 0) No

Plateau started: ( 2) No plateau ( 1) Yes ( 0) No

Decline started: ( 1) Yes ( 0) No

AGE AT each of the following periods (use '99' if N/A):

Maximum Lung Growth: \_\_\_\_ . \_\_\_\_

Start of Plateau: \_\_\_\_ . \_\_\_\_

Start of Decline: \_\_\_\_ . \_\_\_\_



### Pre-BD FEV1 Data and Percentiles: 1005

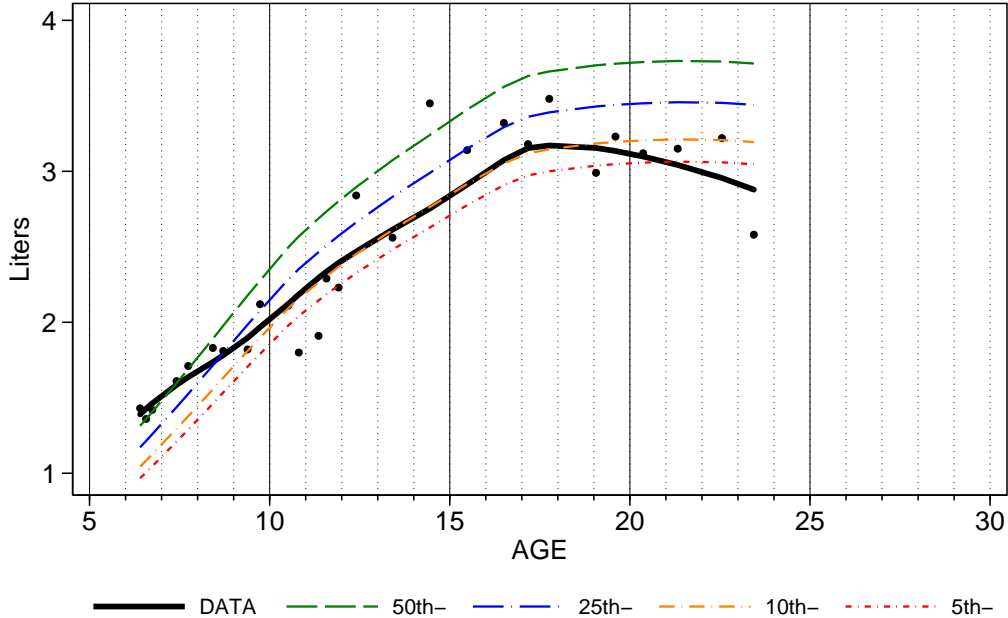

1005

**PATTERN OF GROWTH/DECLINE (Check One)**

- ( 1 ) Normal Growth
- ( 2 ) Normal Growth, Early Decline
- ( 3 ) Reduced Growth
- ( 4 ) Reduced Growth, Early Decline
- ( 9 ) Undetermined Pattern
- ( 8 ) Undetermined - not enough data

Maximum lung growth attained: ( 1 ) Yes ( 0 ) No

Plateau started: ( 2 ) No plateau ( 1 ) Yes ( 0 ) No

Decline started: ( 1 ) Yes ( 0 ) No

AGE AT each of the following periods (use '99' if N/A):

Maximum Lung Growth: \_\_\_\_ . \_\_\_\_

Start of Plateau: \_\_\_\_ . \_\_\_\_

Start of Decline: \_\_\_\_ . \_\_\_\_

### Pre-BD FEV1 Data and Percentiles: 1009

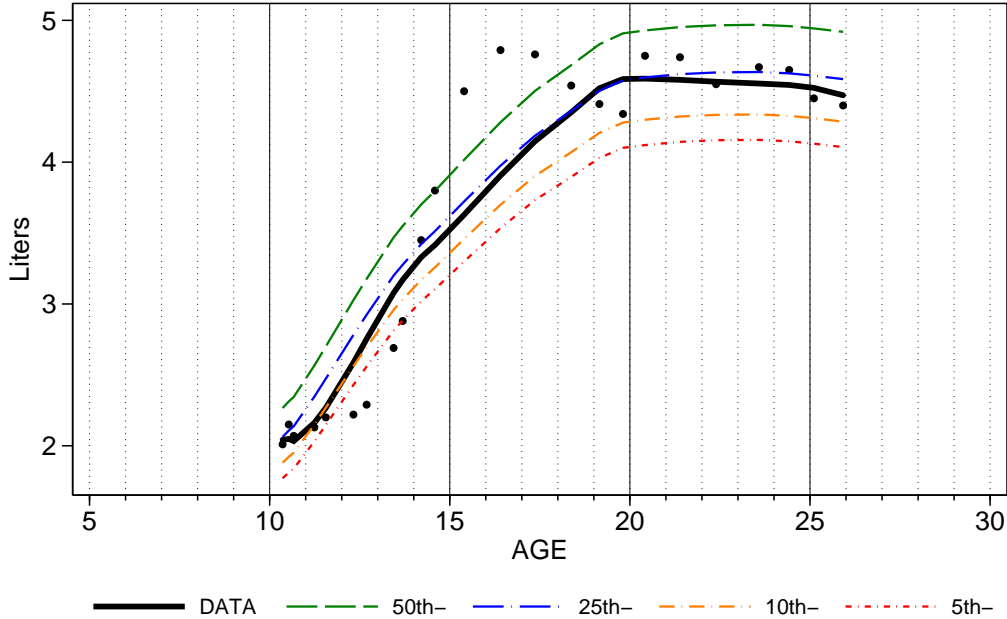

1009

**PATTERN OF GROWTH/DECLINE (Check One)**

- ( 1 ) Normal Growth
- ( 2 ) Normal Growth, Early Decline
- ( 3 ) Reduced Growth
- ( 4 ) Reduced Growth, Early Decline
- ( 9 ) Undetermined Pattern
- ( 8 ) Undetermined - not enough data

Maximum lung growth attained: ( 1 ) Yes ( 0 ) No

Plateau started: ( 2 ) No plateau ( 1 ) Yes ( 0 ) No

Decline started: ( 1 ) Yes ( 0 ) No

AGE AT each of the following periods (use '99' if N/A):

Maximum Lung Growth: \_\_\_\_ . \_\_\_\_

Start of Plateau: \_\_\_\_ . \_\_\_\_

Start of Decline: \_\_\_\_ . \_\_\_\_

### Pre-BD FEV1 Data and Percentiles: 1022

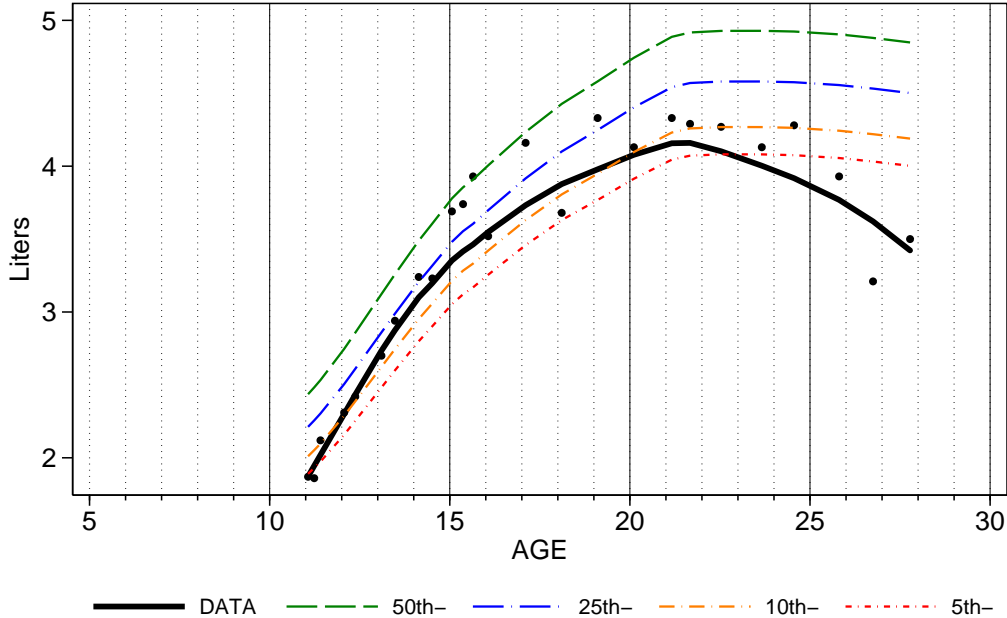

1022

**PATTERN OF GROWTH/DECLINE (Check One)**

- ( 1) Normal Growth
- ( 2) Normal Growth, Early Decline
- ( 3) Reduced Growth
- ( 4) Reduced Growth, Early Decline
- ( 9) Undetermined Pattern
- ( 8) Undetermined - not enough data

Maximum lung growth attained: ( 1) Yes ( 0) No

Plateau started: ( 2) No plateau ( 1) Yes ( 0) No

Decline started: ( 1) Yes ( 0) No

AGE AT each of the following periods (use '99' if N/A):

Maximum Lung Growth: \_\_\_\_ . \_\_\_\_

Start of Plateau: \_\_\_\_ . \_\_\_\_

Start of Decline: \_\_\_\_ . \_\_\_\_

### Pre-BD FEV1 Data and Percentiles: 1024

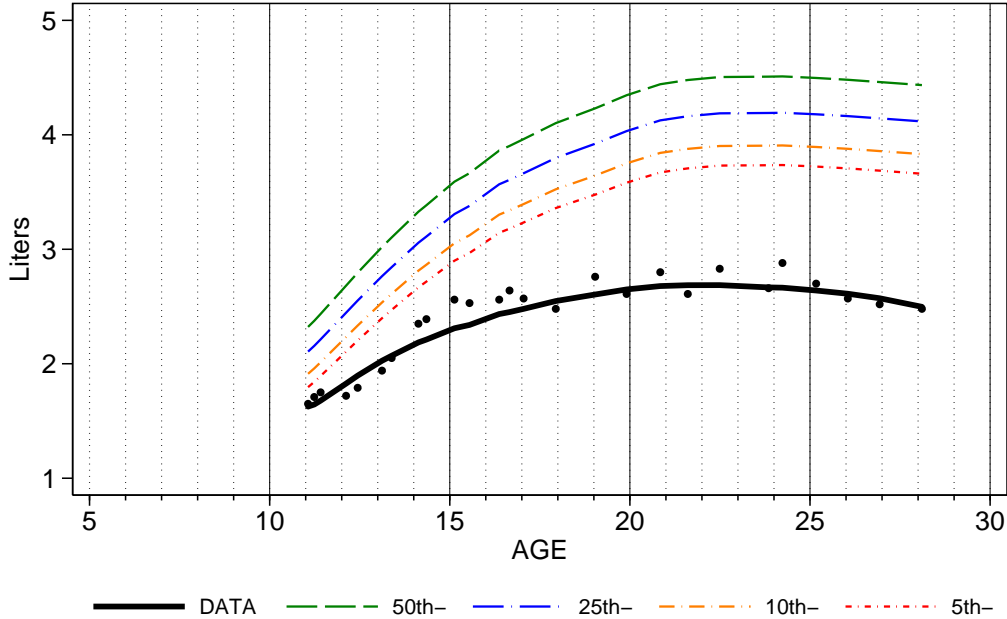

1024

**PATTERN OF GROWTH/DECLINE (Check One)**

- ( 1) Normal Growth
- ( 2) Normal Growth, Early Decline
- ( 3) Reduced Growth
- ( 4) Reduced Growth, Early Decline
- ( 9) Undetermined Pattern
- ( 8) Undetermined - not enough data

Maximum lung growth attained: ( 1) Yes ( 0) No

Plateau started: ( 2) No plateau ( 1) Yes ( 0) No

Decline started: ( 1) Yes ( 0) No

AGE AT each of the following periods (use '99' if N/A):

Maximum Lung Growth: \_\_\_\_ . \_\_\_\_

Start of Plateau: \_\_\_\_ . \_\_\_\_

Start of Decline: \_\_\_\_ . \_\_\_\_

### Pre-BD FEV1 Data and Percentiles: 1026

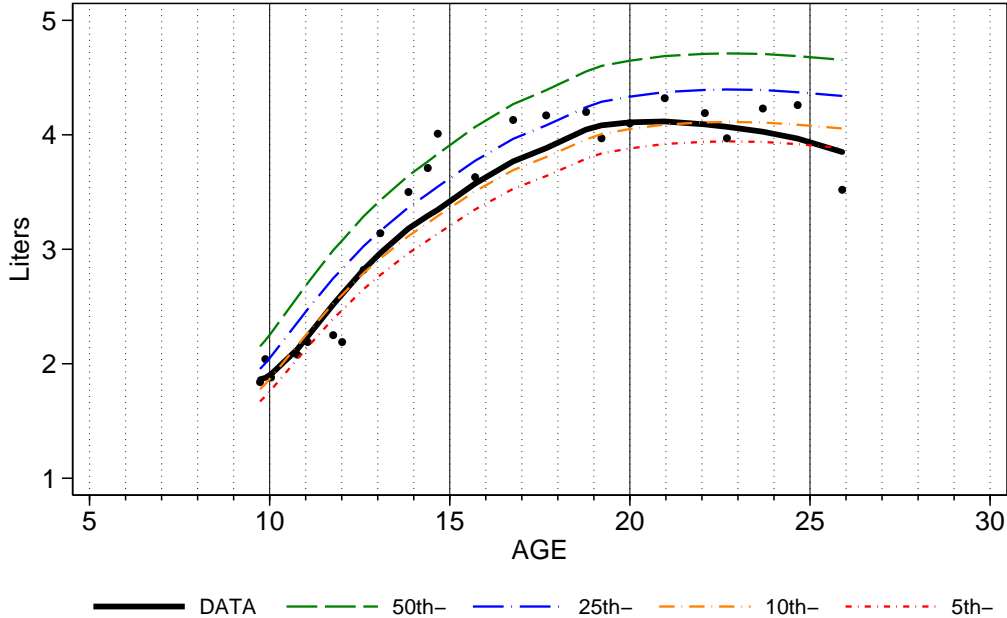

1026

**PATTERN OF GROWTH/DECLINE (Check One)**

- ( 1 ) Normal Growth
- ( 2 ) Normal Growth, Early Decline
- ( 3 ) Reduced Growth
- ( 4 ) Reduced Growth, Early Decline
- ( 9 ) Undetermined Pattern
- ( 8 ) Undetermined - not enough data

Maximum lung growth attained: ( 1 ) Yes ( 0 ) No

Plateau started: ( 2 ) No plateau ( 1 ) Yes ( 0 ) No

Decline started: ( 1 ) Yes ( 0 ) No

AGE AT each of the following periods (use '99' if N/A):

Maximum Lung Growth: \_\_\_\_ . \_\_\_\_

Start of Plateau: \_\_\_\_ . \_\_\_\_

Start of Decline: \_\_\_\_ . \_\_\_\_

### Pre-BD FEV1 Data and Percentiles: 1031

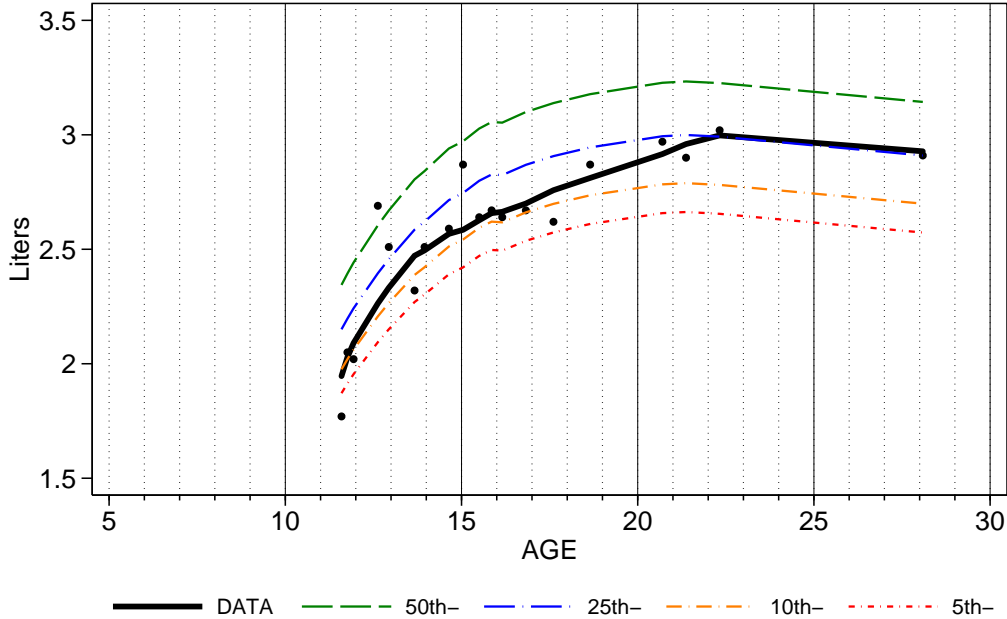

1031

**PATTERN OF GROWTH/DECLINE (Check One)**

- ( 1 ) Normal Growth
- ( 2 ) Normal Growth, Early Decline
- ( 3 ) Reduced Growth
- ( 4 ) Reduced Growth, Early Decline
- ( 9 ) Undetermined Pattern
- ( 8 ) Undetermined - not enough data

Maximum lung growth attained: ( 1 ) Yes ( 0 ) No

Plateau started: ( 2 ) No plateau ( 1 ) Yes ( 0 ) No

Decline started: ( 1 ) Yes ( 0 ) No

AGE AT each of the following periods (use '99' if N/A):

Maximum Lung Growth: \_\_\_\_ . \_\_\_\_

Start of Plateau: \_\_\_\_ . \_\_\_\_

Start of Decline: \_\_\_\_ . \_\_\_\_

### Pre-BD FEV1 Data and Percentiles: 1039

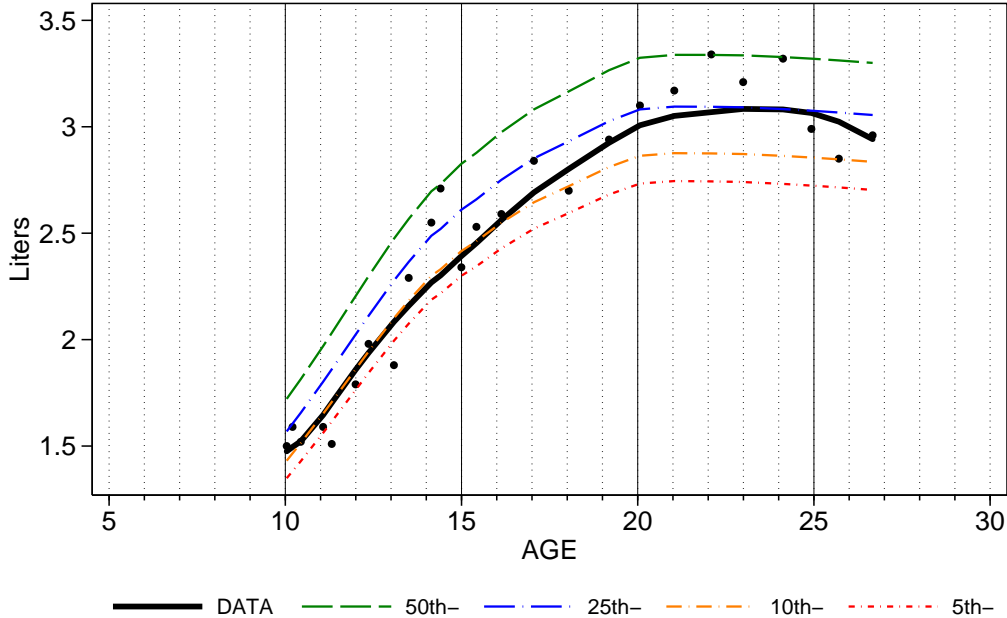

1039

**PATTERN OF GROWTH/DECLINE (Check One)**

- ( 1) Normal Growth
- ( 2) Normal Growth, Early Decline
- ( 3) Reduced Growth
- ( 4) Reduced Growth, Early Decline
- ( 9) Undetermined Pattern
- ( 8) Undetermined - not enough data

Maximum lung growth attained: ( 1) Yes ( 0) No

Plateau started: ( 2) No plateau ( 1) Yes ( 0) No

Decline started: ( 1) Yes ( 0) No

AGE AT each of the following periods (use '99' if N/A):

Maximum Lung Growth: \_\_\_\_ . \_\_\_\_

Start of Plateau: \_\_\_\_ . \_\_\_\_

Start of Decline: \_\_\_\_ . \_\_\_\_

### Pre-BD FEV1 Data and Percentiles: 1040

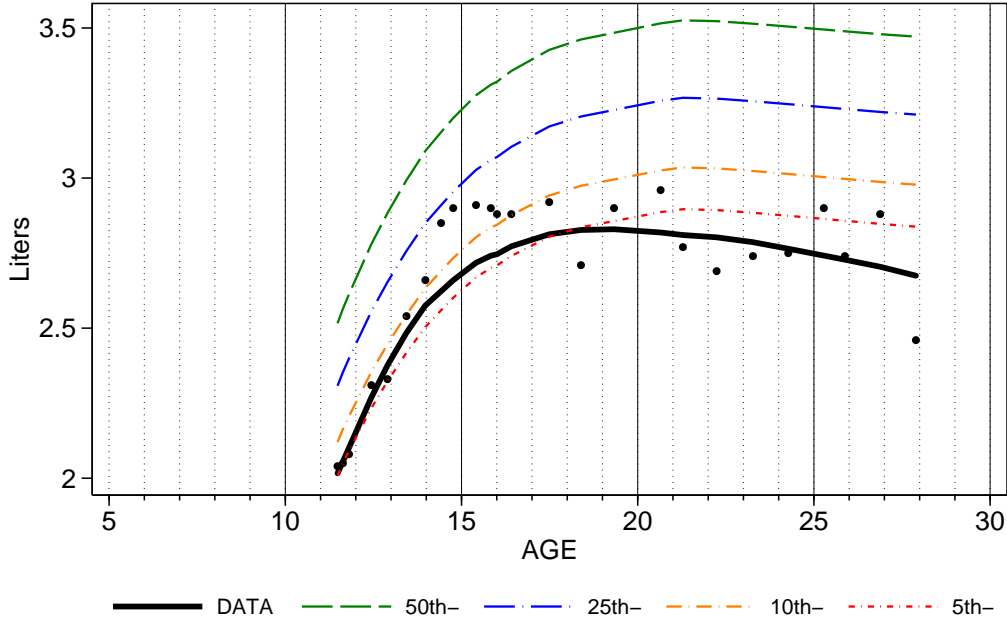

1040

**PATTERN OF GROWTH/DECLINE (Check One)**

- ( 1) Normal Growth
- ( 2) Normal Growth, Early Decline
- ( 3) Reduced Growth
- ( 4) Reduced Growth, Early Decline
- ( 9) Undetermined Pattern
- ( 8) Undetermined - not enough data

Maximum lung growth attained: ( 1) Yes ( 0) No

Plateau started: ( 2) No plateau ( 1) Yes ( 0) No

Decline started: ( 1) Yes ( 0) No

AGE AT each of the following periods (use '99' if N/A):

Maximum Lung Growth: \_\_\_\_ . \_\_\_\_

Start of Plateau: \_\_\_\_ . \_\_\_\_

Start of Decline: \_\_\_\_ . \_\_\_\_



### Pre-BD FEV1 Data and Percentiles: 1041

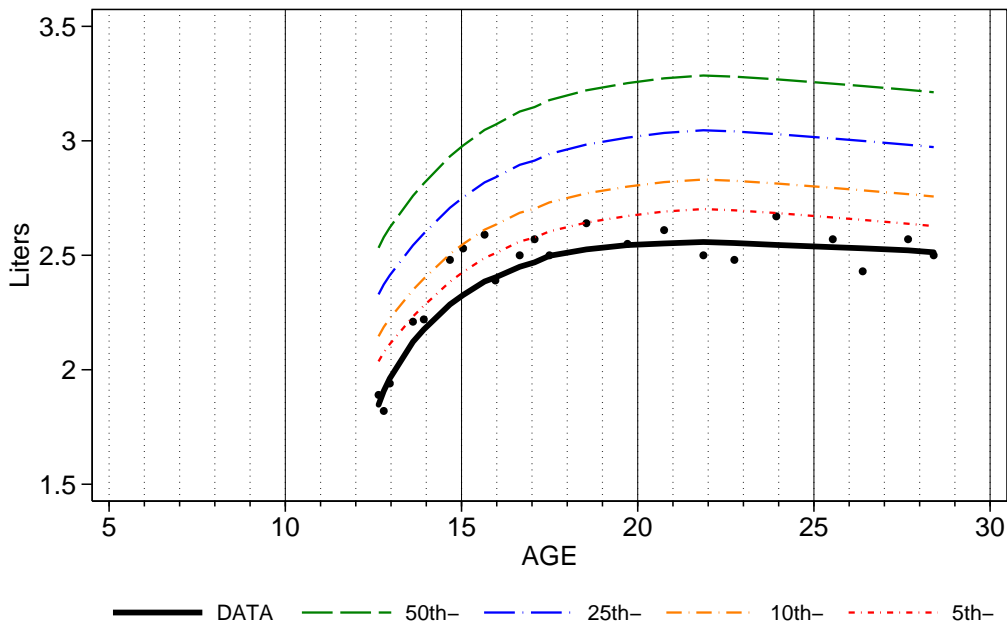

1041

**PATTERN OF GROWTH/DECLINE (Check One)**

- ( 1) Normal Growth
- ( 2) Normal Growth, Early Decline
- ( 3) Reduced Growth
- ( 4) Reduced Growth, Early Decline
- ( 9) Undetermined Pattern
- ( 8) Undetermined - not enough data

Maximum lung growth attained: ( 1) Yes ( 0) No

Plateau started: ( 2) No plateau ( 1) Yes ( 0) No

Decline started: ( 1) Yes ( 0) No

AGE AT each of the following periods (use '99' if N/A):

Maximum Lung Growth: \_\_\_\_ . \_\_\_\_

Start of Plateau: \_\_\_\_ . \_\_\_\_

Start of Decline: \_\_\_\_ . \_\_\_\_

### Pre-BD FEV1 Data and Percentiles: 1042

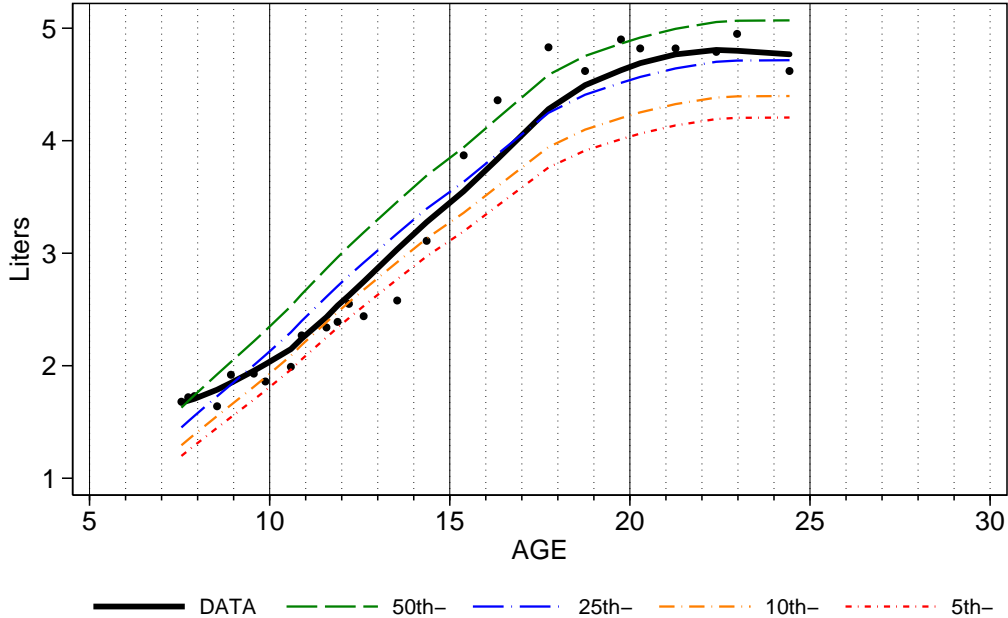

1042

**PATTERN OF GROWTH/DECLINE (Check One)**

- ( 1) Normal Growth
- ( 2) Normal Growth, Early Decline
- ( 3) Reduced Growth
- ( 4) Reduced Growth, Early Decline
- ( 9) Undetermined Pattern
- ( 8) Undetermined - not enough data

Maximum lung growth attained: ( 1) Yes ( 0) No

Plateau started: ( 2) No plateau ( 1) Yes ( 0) No

Decline started: ( 1) Yes ( 0) No

AGE AT each of the following periods (use '99' if N/A):

Maximum Lung Growth: \_\_\_\_ . \_\_\_\_

Start of Plateau: \_\_\_\_ . \_\_\_\_

Start of Decline: \_\_\_\_ . \_\_\_\_

### Pre-BD FEV1 Data and Percentiles: 1050

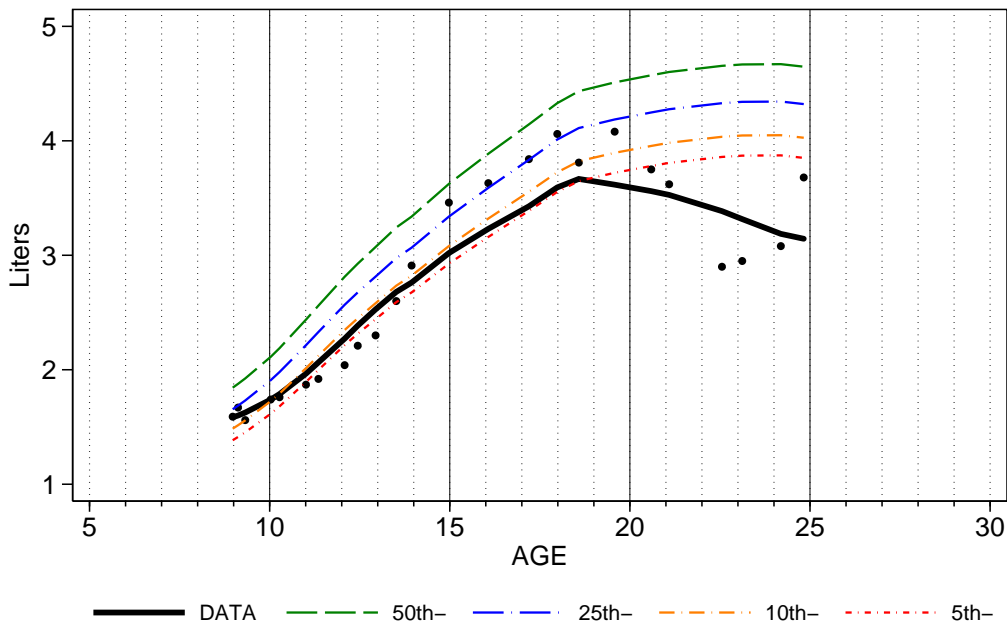

1050

**PATTERN OF GROWTH/DECLINE (Check One)**

- ( 1 ) Normal Growth
- ( 2 ) Normal Growth, Early Decline
- ( 3 ) Reduced Growth
- ( 4 ) Reduced Growth, Early Decline
- ( 9 ) Undetermined Pattern
- ( 8 ) Undetermined - not enough data

Maximum lung growth attained: ( 1 ) Yes ( 0 ) No

Plateau started: ( 2 ) No plateau ( 1 ) Yes ( 0 ) No

Decline started: ( 1 ) Yes ( 0 ) No

AGE AT each of the following periods (use '99' if N/A):

Maximum Lung Growth: \_\_\_\_ . \_\_\_\_

Start of Plateau: \_\_\_\_ . \_\_\_\_

Start of Decline: \_\_\_\_ . \_\_\_\_

### Pre-BD FEV1 Data and Percentiles: 1052

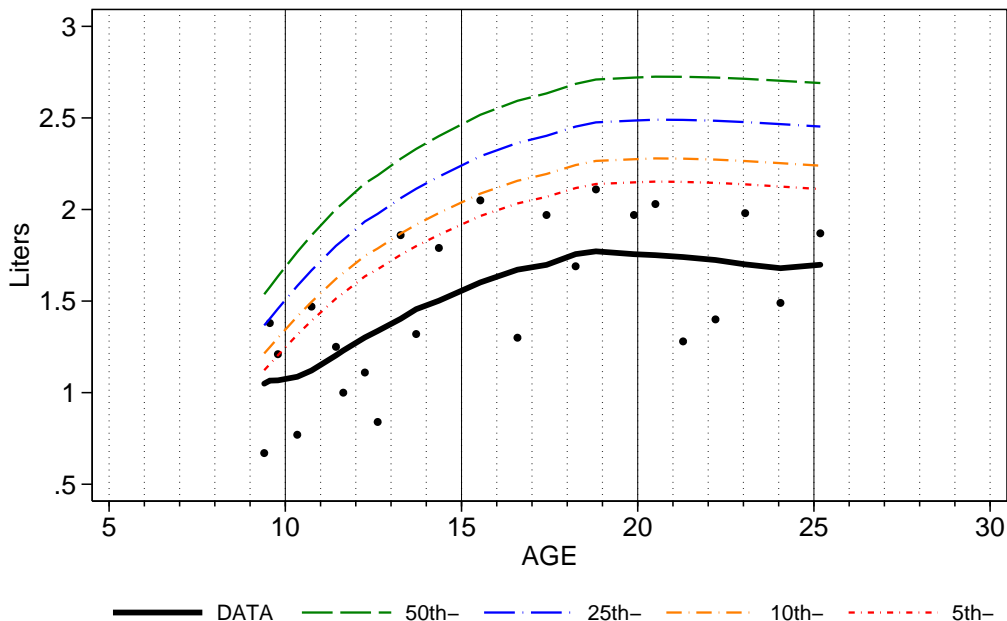

1052

**PATTERN OF GROWTH/DECLINE (Check One)**

- ( 1) Normal Growth
- ( 2) Normal Growth, Early Decline
- ( 3) Reduced Growth
- ( 4) Reduced Growth, Early Decline
- ( 9) Undetermined Pattern
- ( 8) Undetermined - not enough data

Maximum lung growth attained: ( 1) Yes ( 0) No

Plateau started: ( 2) No plateau ( 1) Yes ( 0) No

Decline started: ( 1) Yes ( 0) No

AGE AT each of the following periods (use '99' if N/A):

Maximum Lung Growth: \_\_\_\_ . \_\_\_\_

Start of Plateau: \_\_\_\_ . \_\_\_\_

Start of Decline: \_\_\_\_ . \_\_\_\_

### Pre-BD FEV1 Data and Percentiles: 1055

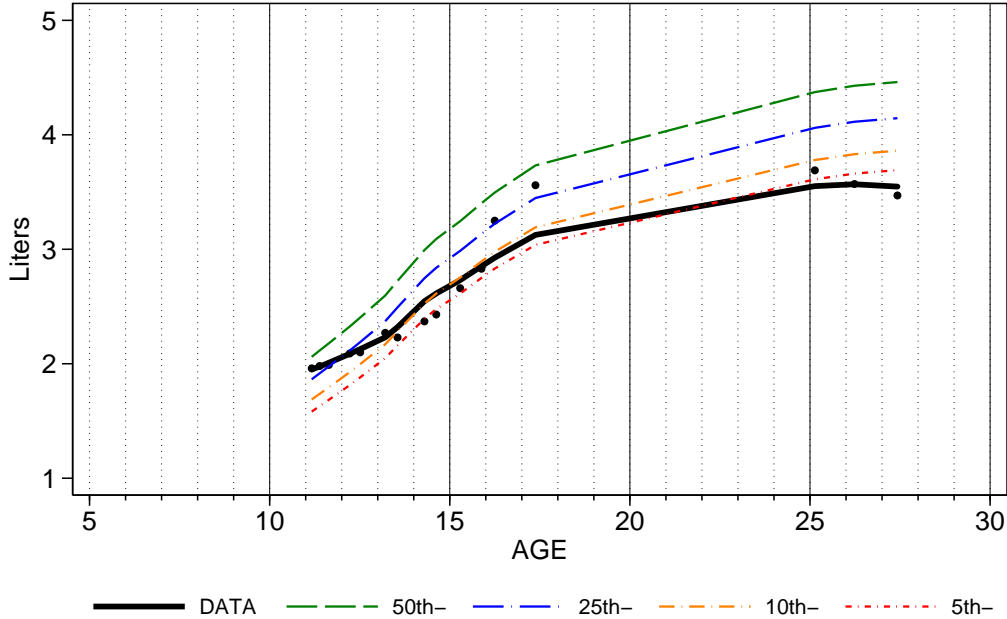

1055

**PATTERN OF GROWTH/DECLINE (Check One)**

- ( 1 ) Normal Growth
- ( 2 ) Normal Growth, Early Decline
- ( 3 ) Reduced Growth
- ( 4 ) Reduced Growth, Early Decline
- ( 9 ) Undetermined Pattern
- ( 8 ) Undetermined - not enough data

Maximum lung growth attained: ( 1 ) Yes ( 0 ) No

Plateau started: ( 2 ) No plateau ( 1 ) Yes ( 0 ) No

Decline started: ( 1 ) Yes ( 0 ) No

AGE AT each of the following periods (use '99' if N/A):

Maximum Lung Growth: \_\_\_\_ . \_\_\_\_

Start of Plateau: \_\_\_\_ . \_\_\_\_

Start of Decline: \_\_\_\_ . \_\_\_\_

### Pre-BD FEV1 Data and Percentiles: 1061

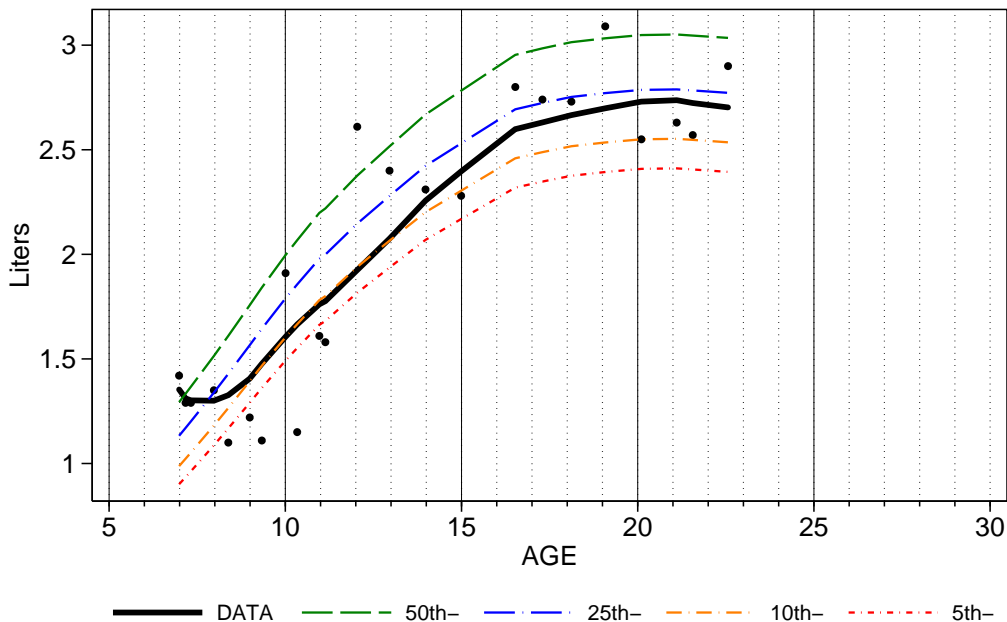

1061

**PATTERN OF GROWTH/DECLINE (Check One)**

- ( 1 ) Normal Growth
- ( 2 ) Normal Growth, Early Decline
- ( 3 ) Reduced Growth
- ( 4 ) Reduced Growth, Early Decline
- ( 9 ) Undetermined Pattern
- ( 8 ) Undetermined - not enough data

Maximum lung growth attained: ( 1 ) Yes ( 0 ) No

Plateau started: ( 2 ) No plateau ( 1 ) Yes ( 0 ) No

Decline started: ( 1 ) Yes ( 0 ) No

AGE AT each of the following periods (use '99' if N/A):

Maximum Lung Growth: \_\_\_\_ . \_\_\_\_

Start of Plateau: \_\_\_\_ . \_\_\_\_

Start of Decline: \_\_\_\_ . \_\_\_\_

### Pre-BD FEV1 Data and Percentiles: 1062

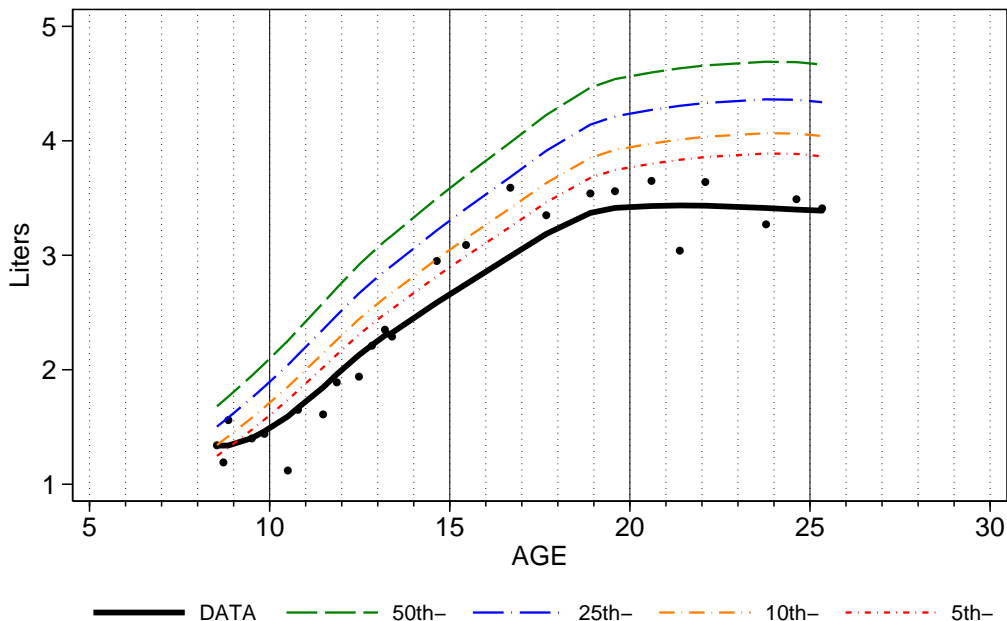

1062

**PATTERN OF GROWTH/DECLINE (Check One)**

- ( 1 ) Normal Growth
- ( 2 ) Normal Growth, Early Decline
- ( 3 ) Reduced Growth
- ( 4 ) Reduced Growth, Early Decline
- ( 9 ) Undetermined Pattern
- ( 8 ) Undetermined - not enough data

Maximum lung growth attained: ( 1 ) Yes ( 0 ) No

Plateau started: ( 2 ) No plateau ( 1 ) Yes ( 0 ) No

Decline started: ( 1 ) Yes ( 0 ) No

AGE AT each of the following periods (use '99' if N/A):

Maximum Lung Growth: \_\_\_\_ . \_\_\_\_

Start of Plateau: \_\_\_\_ . \_\_\_\_

Start of Decline: \_\_\_\_ . \_\_\_\_

### Pre-BD FEV1 Data and Percentiles: 1064

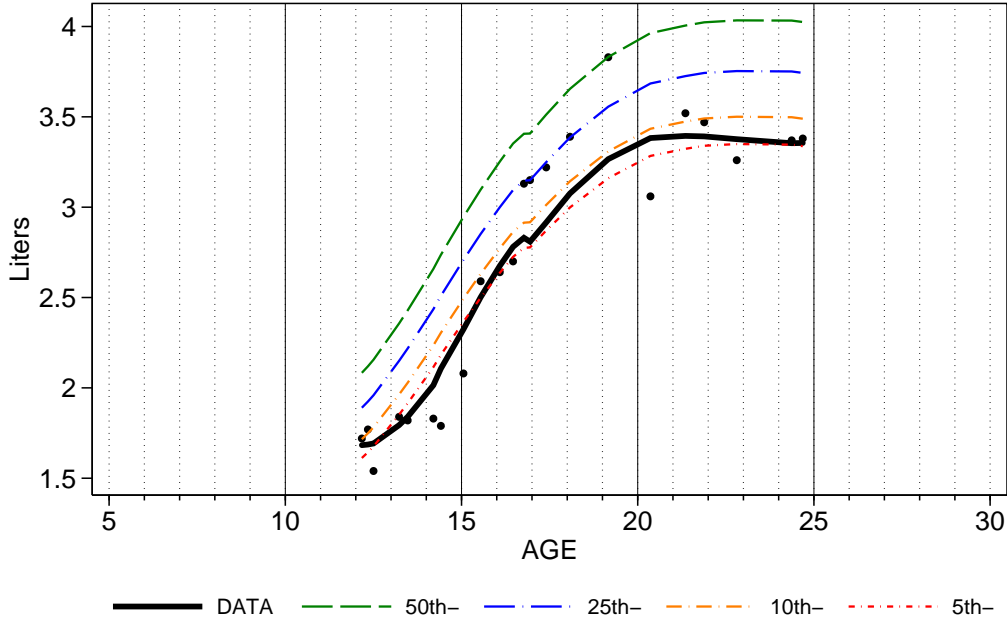

1064

**PATTERN OF GROWTH/DECLINE (Check One)**

- ( 1) Normal Growth
- ( 2) Normal Growth, Early Decline
- ( 3) Reduced Growth
- ( 4) Reduced Growth, Early Decline
- ( 9) Undetermined Pattern
- ( 8) Undetermined - not enough data

Maximum lung growth attained: ( 1) Yes ( 0) No

Plateau started: ( 2) No plateau ( 1) Yes ( 0) No

Decline started: ( 1) Yes ( 0) No

AGE AT each of the following periods (use '99' if N/A):

Maximum Lung Growth: \_\_\_\_ . \_\_\_\_

Start of Plateau: \_\_\_\_ . \_\_\_\_

Start of Decline: \_\_\_\_ . \_\_\_\_



### Pre-BD FEV1 Data and Percentiles: 1066

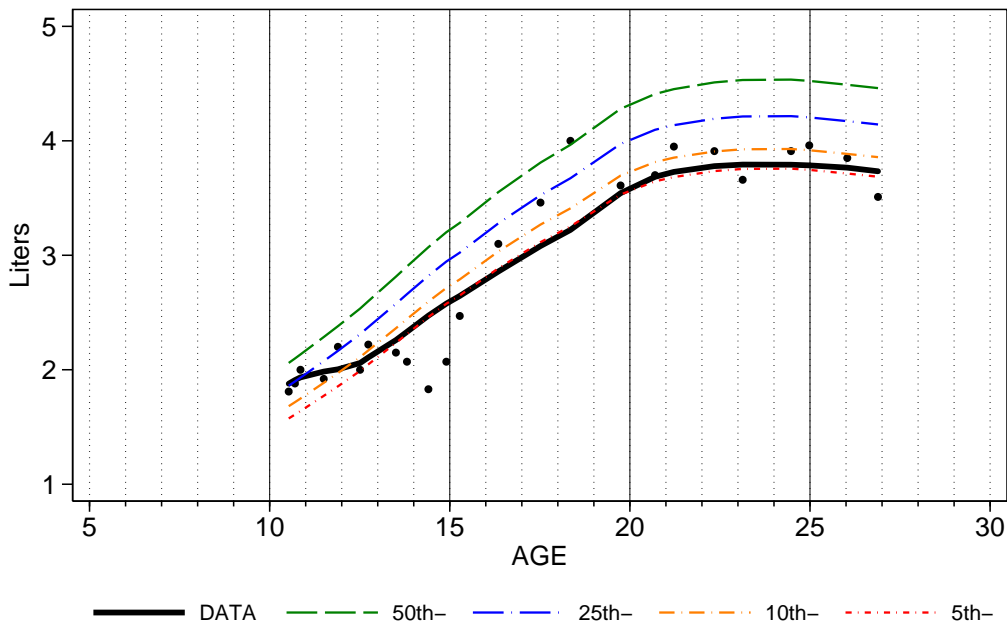

1066

**PATTERN OF GROWTH/DECLINE (Check One)**

- ( 1) Normal Growth
- ( 2) Normal Growth, Early Decline
- ( 3) Reduced Growth
- ( 4) Reduced Growth, Early Decline
- ( 9) Undetermined Pattern
- ( 8) Undetermined - not enough data

Maximum lung growth attained: ( 1) Yes ( 0) No

Plateau started: ( 2) No plateau ( 1) Yes ( 0) No

Decline started: ( 1) Yes ( 0) No

AGE AT each of the following periods (use '99' if N/A):

Maximum Lung Growth: \_\_\_\_ . \_\_\_\_

Start of Plateau: \_\_\_\_ . \_\_\_\_

Start of Decline: \_\_\_\_ . \_\_\_\_

### Pre-BD FEV1 Data and Percentiles: 1068

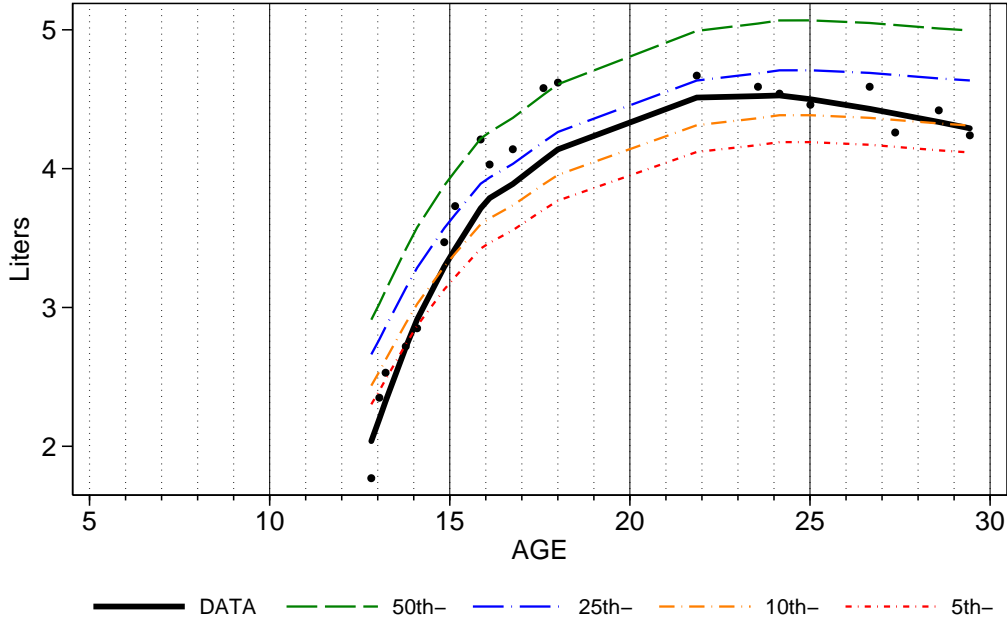

1068

**PATTERN OF GROWTH/DECLINE (Check One)**

- ( 1) Normal Growth
- ( 2) Normal Growth, Early Decline
- ( 3) Reduced Growth
- ( 4) Reduced Growth, Early Decline
- ( 9) Undetermined Pattern
- ( 8) Undetermined - not enough data

Maximum lung growth attained: ( 1) Yes ( 0) No

Plateau started: ( 2) No plateau ( 1) Yes ( 0) No

Decline started: ( 1) Yes ( 0) No

AGE AT each of the following periods (use '99' if N/A):

Maximum Lung Growth: \_\_\_\_ . \_\_\_\_

Start of Plateau: \_\_\_\_ . \_\_\_\_

Start of Decline: \_\_\_\_ . \_\_\_\_

### Pre-BD FEV1 Data and Percentiles: 1073

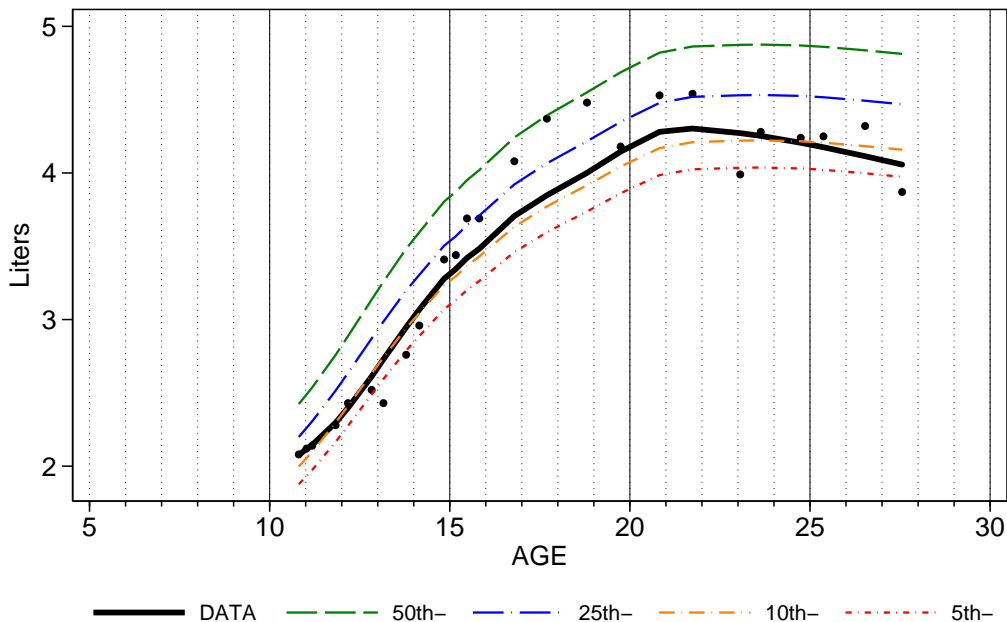

1073

**PATTERN OF GROWTH/DECLINE (Check One)**

- ( 1 ) Normal Growth
- ( 2 ) Normal Growth, Early Decline
- ( 3 ) Reduced Growth
- ( 4 ) Reduced Growth, Early Decline
- ( 9 ) Undetermined Pattern
- ( 8 ) Undetermined - not enough data

Maximum lung growth attained: ( 1 ) Yes ( 0 ) No

Plateau started: ( 2 ) No plateau ( 1 ) Yes ( 0 ) No

Decline started: ( 1 ) Yes ( 0 ) No

AGE AT each of the following periods (use '99' if N/A):

Maximum Lung Growth: \_\_\_\_ . \_\_\_\_

Start of Plateau: \_\_\_\_ . \_\_\_\_

Start of Decline: \_\_\_\_ . \_\_\_\_

### Pre-BD FEV1 Data and Percentiles: 1077

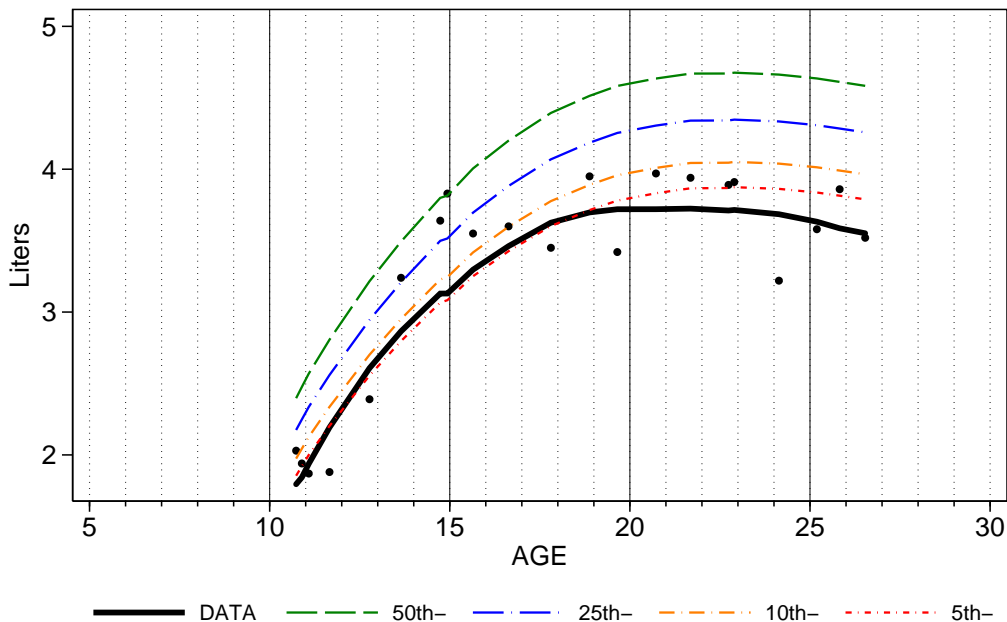

1077

**PATTERN OF GROWTH/DECLINE (Check One)**

- ( 1) Normal Growth
- ( 2) Normal Growth, Early Decline
- ( 3) Reduced Growth
- ( 4) Reduced Growth, Early Decline
- ( 9) Undetermined Pattern
- ( 8) Undetermined - not enough data

Maximum lung growth attained: ( 1) Yes ( 0) No

Plateau started: ( 2) No plateau ( 1) Yes ( 0) No

Decline started: ( 1) Yes ( 0) No

AGE AT each of the following periods (use '99' if N/A):

Maximum Lung Growth: \_\_\_\_ . \_\_\_\_

Start of Plateau: \_\_\_\_ . \_\_\_\_

Start of Decline: \_\_\_\_ . \_\_\_\_

### Pre-BD FEV1 Data and Percentiles: 1084

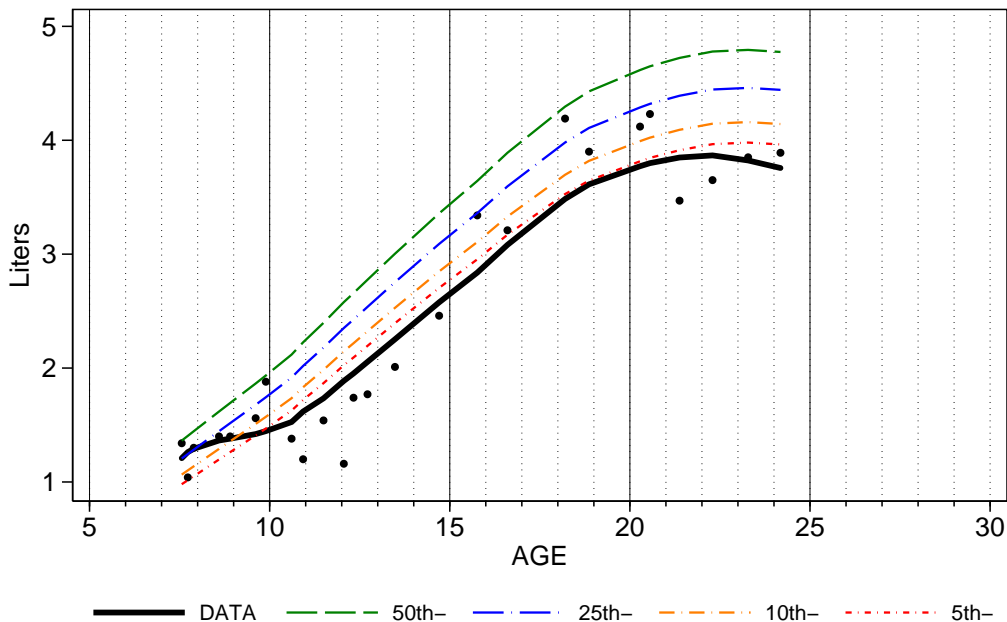

1084

**PATTERN OF GROWTH/DECLINE (Check One)**

- ( 1) Normal Growth
- ( 2) Normal Growth, Early Decline
- ( 3) Reduced Growth
- ( 4) Reduced Growth, Early Decline
- ( 9) Undetermined Pattern
- ( 8) Undetermined - not enough data

Maximum lung growth attained: ( 1) Yes ( 0) No

Plateau started: ( 2) No plateau ( 1) Yes ( 0) No

Decline started: ( 1) Yes ( 0) No

AGE AT each of the following periods (use '99' if N/A):

Maximum Lung Growth: \_\_\_\_ . \_\_\_\_

Start of Plateau: \_\_\_\_ . \_\_\_\_

Start of Decline: \_\_\_\_ . \_\_\_\_

### Pre-BD FEV1 Data and Percentiles: 1086

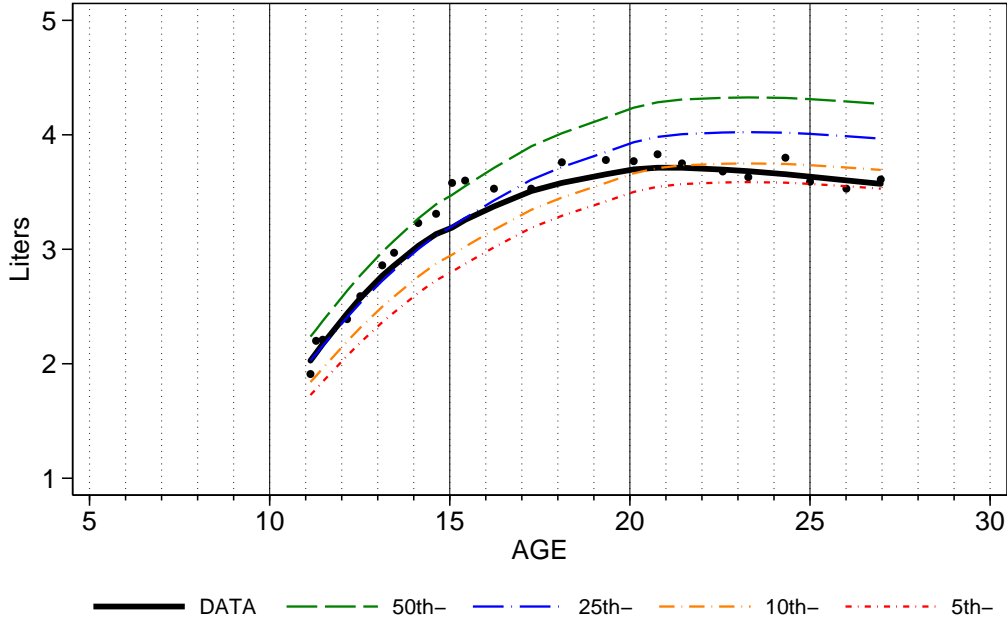

1086

**PATTERN OF GROWTH/DECLINE (Check One)**

- ( 1 ) Normal Growth
- ( 2 ) Normal Growth, Early Decline
- ( 3 ) Reduced Growth
- ( 4 ) Reduced Growth, Early Decline
- ( 9 ) Undetermined Pattern
- ( 8 ) Undetermined - not enough data

Maximum lung growth attained: ( 1 ) Yes ( 0 ) No

Plateau started: ( 2 ) No plateau ( 1 ) Yes ( 0 ) No

Decline started: ( 1 ) Yes ( 0 ) No

AGE AT each of the following periods (use '99' if N/A):

Maximum Lung Growth: \_\_\_\_ . \_\_\_\_

Start of Plateau: \_\_\_\_ . \_\_\_\_

Start of Decline: \_\_\_\_ . \_\_\_\_

### Pre-BD FEV1 Data and Percentiles: 1091

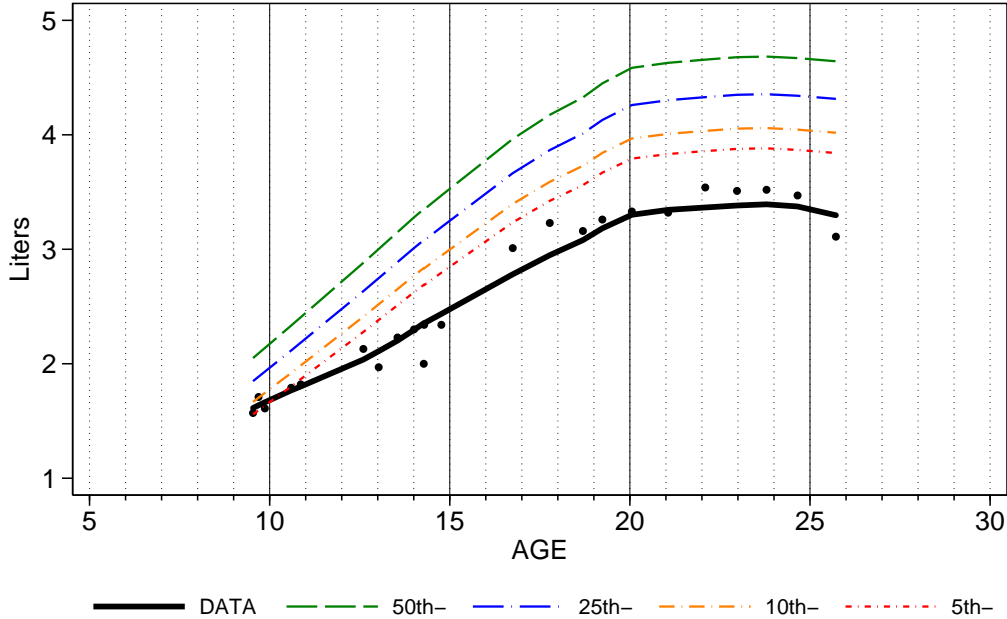

1091

**PATTERN OF GROWTH/DECLINE (Check One)**

- ( 1) Normal Growth
- ( 2) Normal Growth, Early Decline
- ( 3) Reduced Growth
- ( 4) Reduced Growth, Early Decline
- ( 9) Undetermined Pattern
- ( 8) Undetermined - not enough data

Maximum lung growth attained: ( 1) Yes ( 0) No

Plateau started: ( 2) No plateau ( 1) Yes ( 0) No

Decline started: ( 1) Yes ( 0) No

AGE AT each of the following periods (use '99' if N/A):

Maximum Lung Growth: \_\_\_\_ . \_\_\_\_

Start of Plateau: \_\_\_\_ . \_\_\_\_

Start of Decline: \_\_\_\_ . \_\_\_\_

### Pre-BD FEV1 Data and Percentiles: 1093

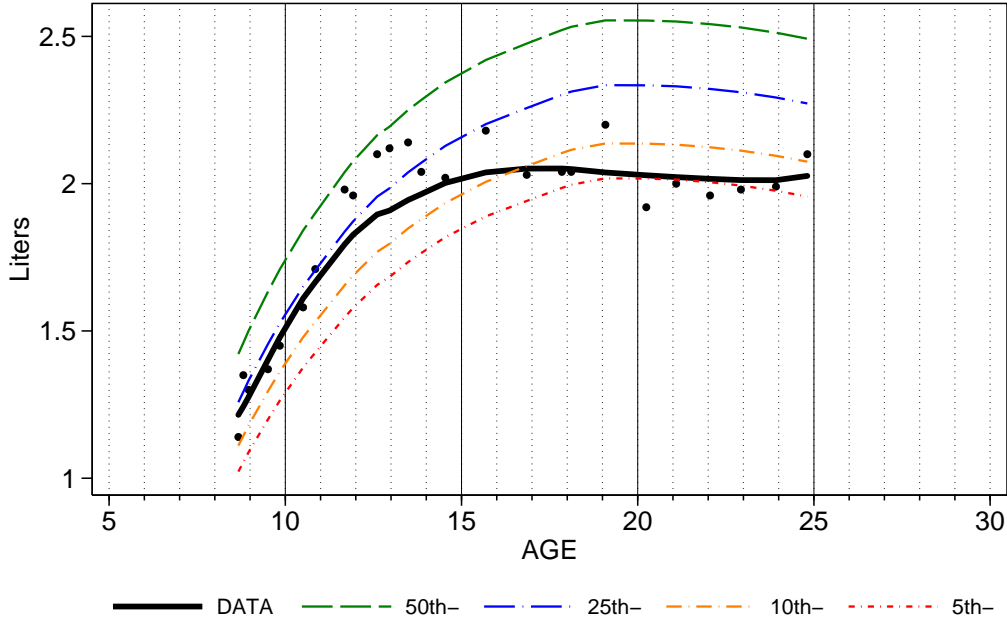

1093

**PATTERN OF GROWTH/DECLINE (Check One)**

- ( 1 ) Normal Growth
- ( 2 ) Normal Growth, Early Decline
- ( 3 ) Reduced Growth
- ( 4 ) Reduced Growth, Early Decline
- ( 9 ) Undetermined Pattern
- ( 8 ) Undetermined - not enough data

Maximum lung growth attained: ( 1 ) Yes ( 0 ) No

Plateau started: ( 2 ) No plateau ( 1 ) Yes ( 0 ) No

Decline started: ( 1 ) Yes ( 0 ) No

AGE AT each of the following periods (use '99' if N/A):

Maximum Lung Growth: \_\_\_\_ . \_\_\_\_

Start of Plateau: \_\_\_\_ . \_\_\_\_

Start of Decline: \_\_\_\_ . \_\_\_\_



### Pre-BD FEV1 Data and Percentiles: 1094

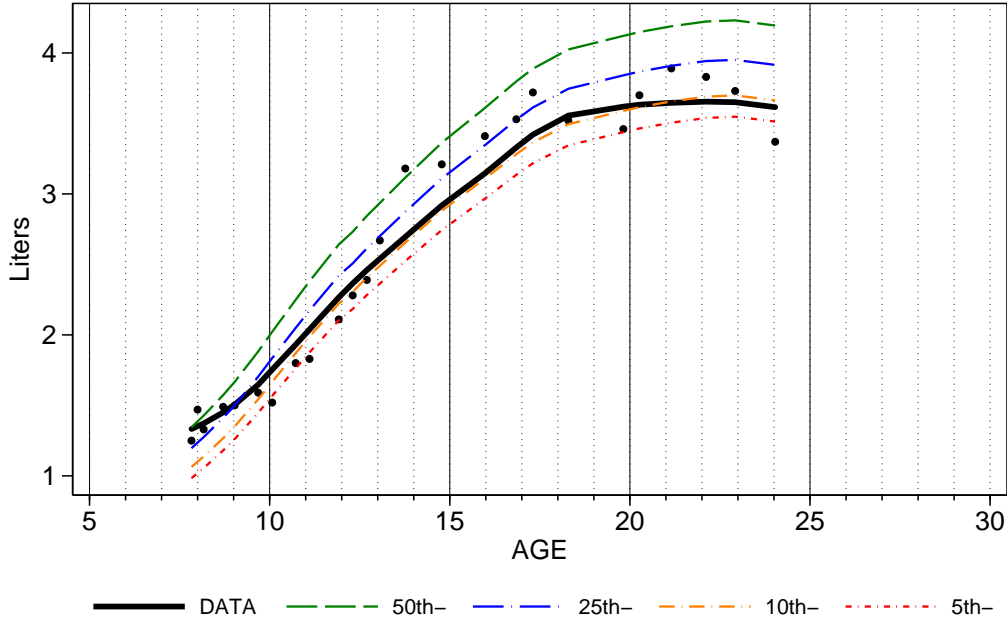

1094

**PATTERN OF GROWTH/DECLINE (Check One)**

- ( 1 ) Normal Growth
- ( 2 ) Normal Growth, Early Decline
- ( 3 ) Reduced Growth
- ( 4 ) Reduced Growth, Early Decline
- ( 9 ) Undetermined Pattern
- ( 8 ) Undetermined - not enough data

Maximum lung growth attained: ( 1 ) Yes ( 0 ) No

Plateau started: ( 2 ) No plateau ( 1 ) Yes ( 0 ) No

Decline started: ( 1 ) Yes ( 0 ) No

AGE AT each of the following periods (use '99' if N/A):

Maximum Lung Growth: \_\_\_\_ . \_\_\_\_

Start of Plateau: \_\_\_\_ . \_\_\_\_

Start of Decline: \_\_\_\_ . \_\_\_\_

### Pre-BD FEV1 Data and Percentiles: 1103

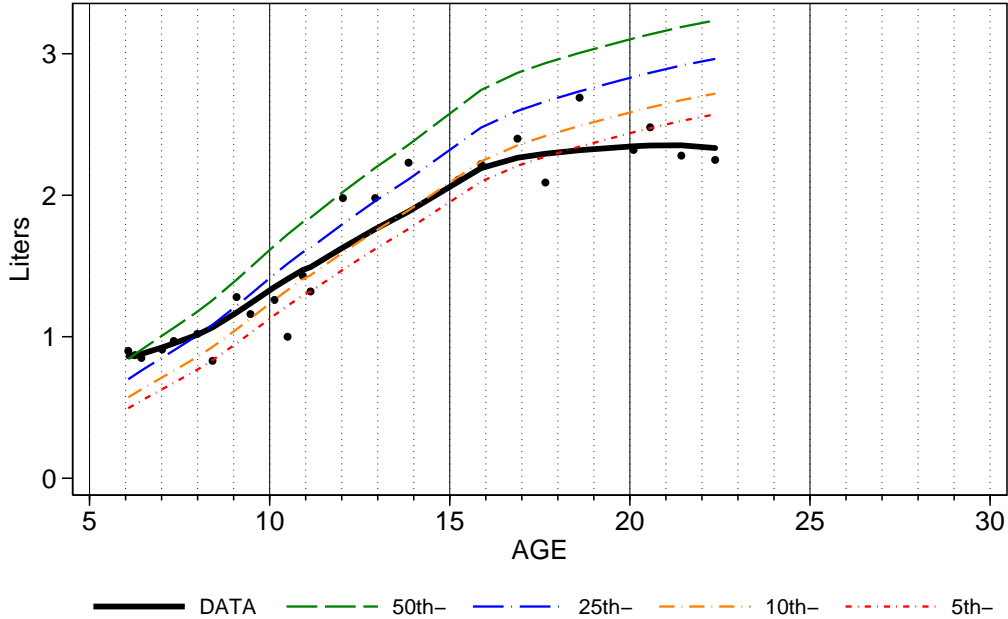

1103

**PATTERN OF GROWTH/DECLINE (Check One)**

- ( 1 ) Normal Growth
- ( 2 ) Normal Growth, Early Decline
- ( 3 ) Reduced Growth
- ( 4 ) Reduced Growth, Early Decline
- ( 9 ) Undetermined Pattern
- ( 8 ) Undetermined - not enough data

Maximum lung growth attained: ( 1 ) Yes ( 0 ) No

Plateau started: ( 2 ) No plateau ( 1 ) Yes ( 0 ) No

Decline started: ( 1 ) Yes ( 0 ) No

AGE AT each of the following periods (use '99' if N/A):

Maximum Lung Growth: \_\_\_\_ . \_\_\_\_

Start of Plateau: \_\_\_\_ . \_\_\_\_

Start of Decline: \_\_\_\_ . \_\_\_\_

### Pre-BD FEV1 Data and Percentiles: 1104

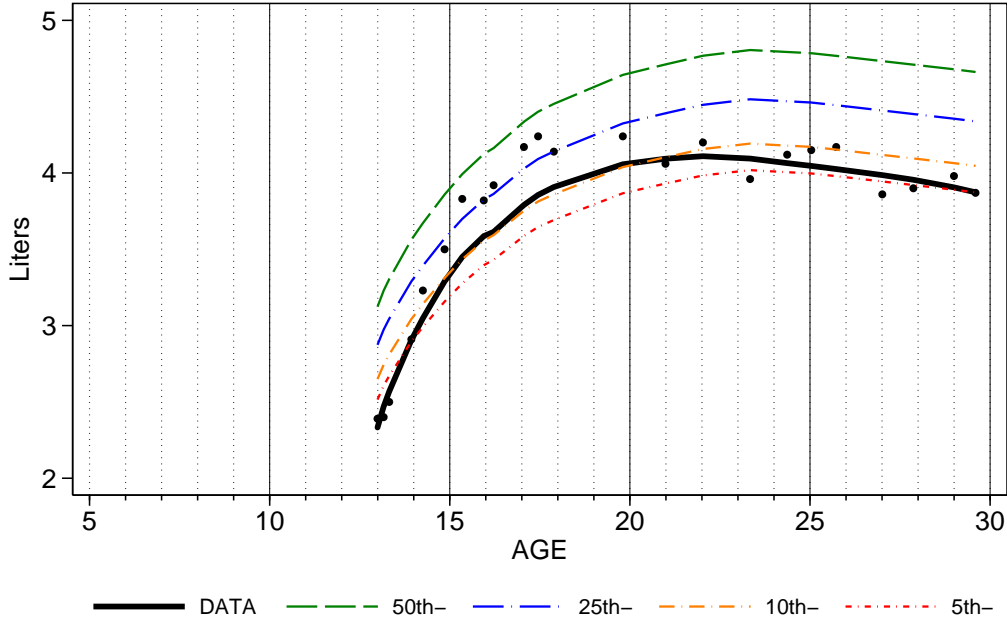

1104

**PATTERN OF GROWTH/DECLINE (Check One)**

- ( 1 ) Normal Growth
- ( 2 ) Normal Growth, Early Decline
- ( 3 ) Reduced Growth
- ( 4 ) Reduced Growth, Early Decline
- ( 9 ) Undetermined Pattern
- ( 8 ) Undetermined - not enough data

Maximum lung growth attained: ( 1 ) Yes ( 0 ) No

Plateau started: ( 2 ) No plateau ( 1 ) Yes ( 0 ) No

Decline started: ( 1 ) Yes ( 0 ) No

AGE AT each of the following periods (use '99' if N/A):

Maximum Lung Growth: \_\_\_\_ . \_\_\_\_

Start of Plateau: \_\_\_\_ . \_\_\_\_

Start of Decline: \_\_\_\_ . \_\_\_\_

### Pre-BD FEV1 Data and Percentiles: 1108

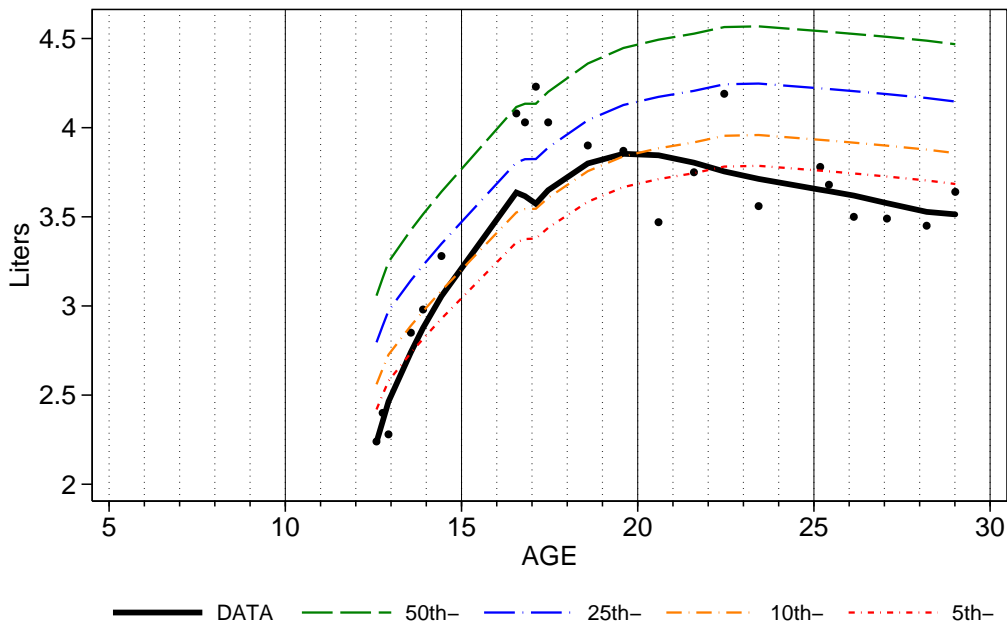

1108

**PATTERN OF GROWTH/DECLINE (Check One)**

- ( 1 ) Normal Growth
- ( 2 ) Normal Growth, Early Decline
- ( 3 ) Reduced Growth
- ( 4 ) Reduced Growth, Early Decline
- ( 9 ) Undetermined Pattern
- ( 8 ) Undetermined - not enough data

Maximum lung growth attained: ( 1 ) Yes ( 0 ) No

Plateau started: ( 2 ) No plateau ( 1 ) Yes ( 0 ) No

Decline started: ( 1 ) Yes ( 0 ) No

AGE AT each of the following periods (use '99' if N/A):

Maximum Lung Growth: \_\_\_\_ . \_\_\_\_

Start of Plateau: \_\_\_\_ . \_\_\_\_

Start of Decline: \_\_\_\_ . \_\_\_\_

### Pre-BD FEV1 Data and Percentiles: 1116

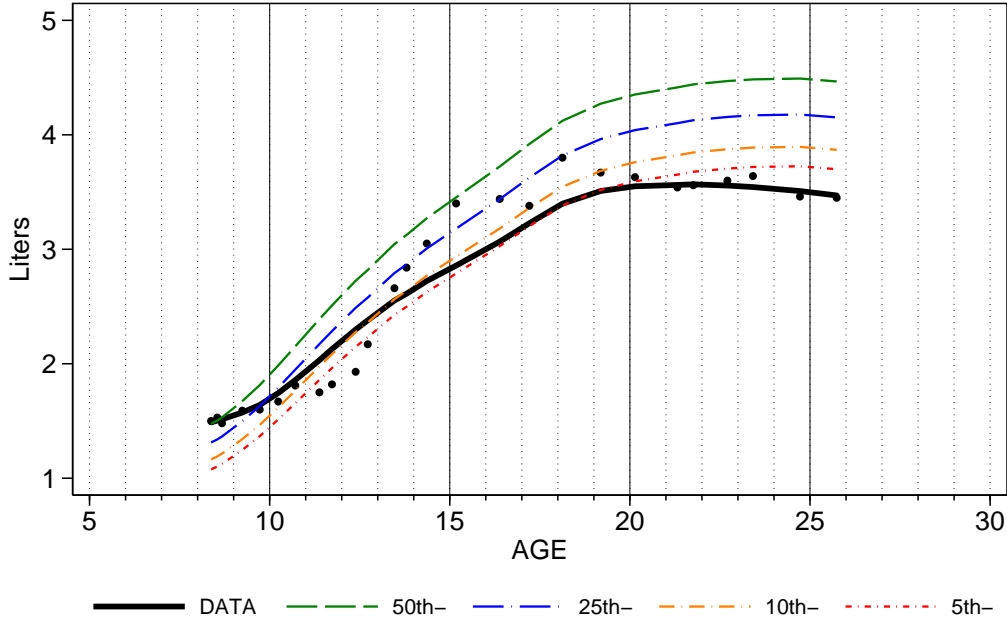

1116

**PATTERN OF GROWTH/DECLINE (Check One)**

- ( 1) Normal Growth
- ( 2) Normal Growth, Early Decline
- ( 3) Reduced Growth
- ( 4) Reduced Growth, Early Decline
- ( 9) Undetermined Pattern
- ( 8) Undetermined - not enough data

Maximum lung growth attained: ( 1) Yes ( 0) No

Plateau started: ( 2) No plateau ( 1) Yes ( 0) No

Decline started: ( 1) Yes ( 0) No

AGE AT each of the following periods (use '99' if N/A):

Maximum Lung Growth: \_\_\_\_ . \_\_\_\_

Start of Plateau: \_\_\_\_ . \_\_\_\_

Start of Decline: \_\_\_\_ . \_\_\_\_

### Pre-BD FEV1 Data and Percentiles: 1126

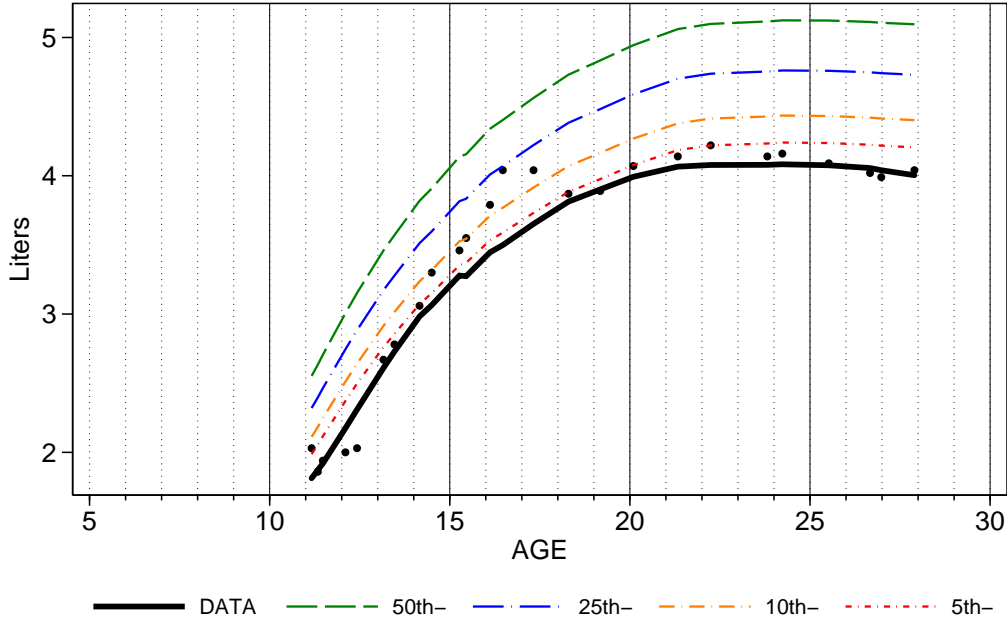

1126

**PATTERN OF GROWTH/DECLINE (Check One)**

- ( 1) Normal Growth
- ( 2) Normal Growth, Early Decline
- ( 3) Reduced Growth
- ( 4) Reduced Growth, Early Decline
- ( 9) Undetermined Pattern
- ( 8) Undetermined - not enough data

Maximum lung growth attained: ( 1) Yes ( 0) No

Plateau started: ( 2) No plateau ( 1) Yes ( 0) No

Decline started: ( 1) Yes ( 0) No

AGE AT each of the following periods (use '99' if N/A):

Maximum Lung Growth: \_\_\_\_ . \_\_\_\_

Start of Plateau: \_\_\_\_ . \_\_\_\_

Start of Decline: \_\_\_\_ . \_\_\_\_

### Pre-BD FEV1 Data and Percentiles: 1127

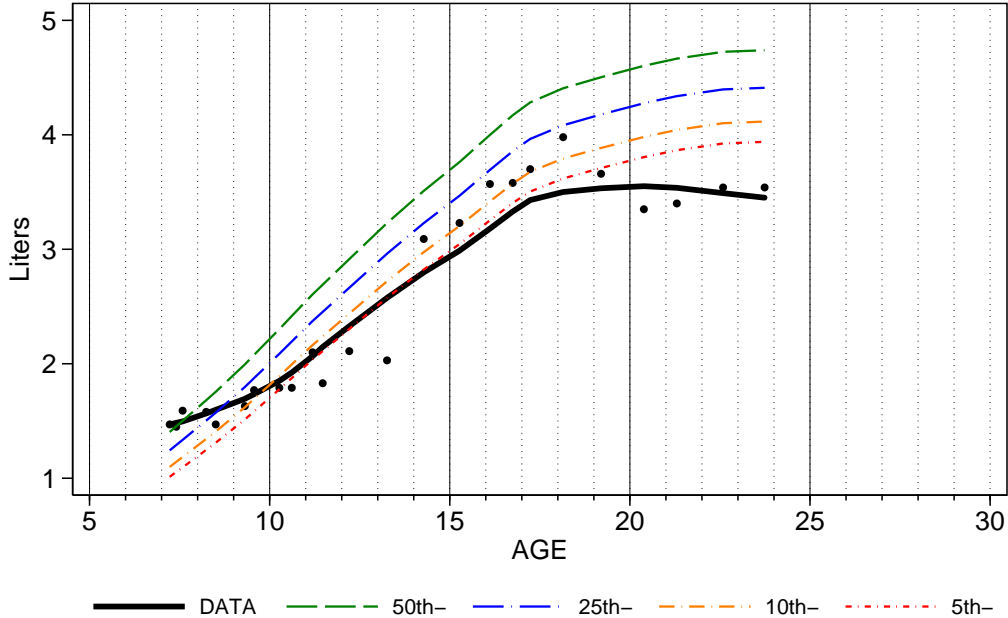

1127

**PATTERN OF GROWTH/DECLINE (Check One)**

- ( 1 ) Normal Growth
- ( 2 ) Normal Growth, Early Decline
- ( 3 ) Reduced Growth
- ( 4 ) Reduced Growth, Early Decline
- ( 9 ) Undetermined Pattern
- ( 8 ) Undetermined - not enough data

Maximum lung growth attained: ( 1 ) Yes ( 0 ) No

Plateau started: ( 2 ) No plateau ( 1 ) Yes ( 0 ) No

Decline started: ( 1 ) Yes ( 0 ) No

AGE AT each of the following periods (use '99' if N/A):

Maximum Lung Growth: \_\_\_\_ . \_\_\_\_

Start of Plateau: \_\_\_\_ . \_\_\_\_

Start of Decline: \_\_\_\_ . \_\_\_\_

### Pre-BD FEV1 Data and Percentiles: 1129

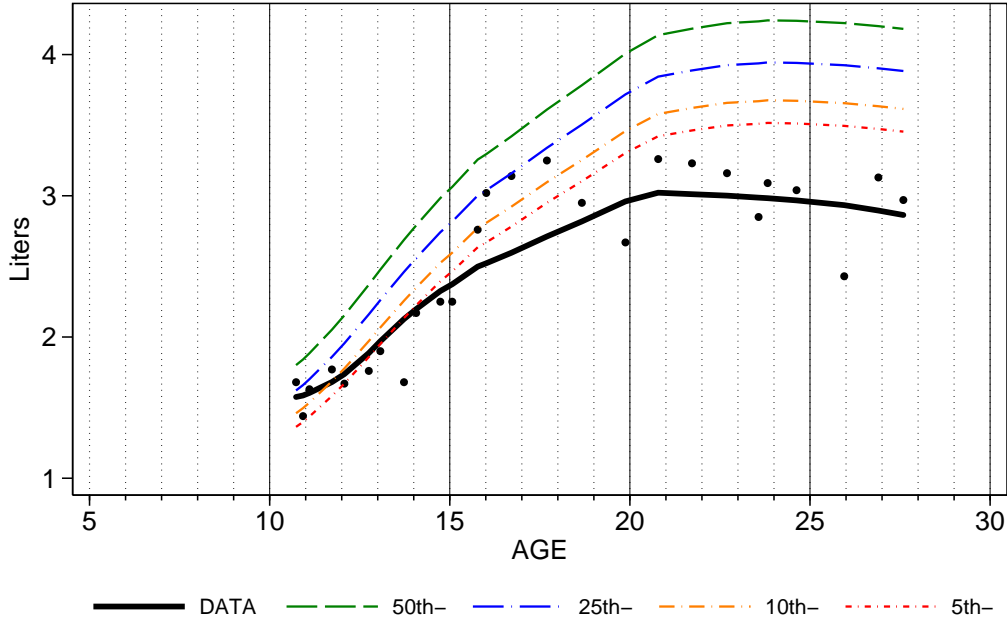

1129

**PATTERN OF GROWTH/DECLINE (Check One)**

- ( 1 ) Normal Growth
- ( 2 ) Normal Growth, Early Decline
- ( 3 ) Reduced Growth
- ( 4 ) Reduced Growth, Early Decline
- ( 9 ) Undetermined Pattern
- ( 8 ) Undetermined - not enough data

Maximum lung growth attained: ( 1 ) Yes ( 0 ) No

Plateau started: ( 2 ) No plateau ( 1 ) Yes ( 0 ) No

Decline started: ( 1 ) Yes ( 0 ) No

AGE AT each of the following periods (use '99' if N/A):

Maximum Lung Growth: \_\_\_\_ . \_\_\_\_

Start of Plateau: \_\_\_\_ . \_\_\_\_

Start of Decline: \_\_\_\_ . \_\_\_\_



### Pre-BD FEV1 Data and Percentiles: 1143

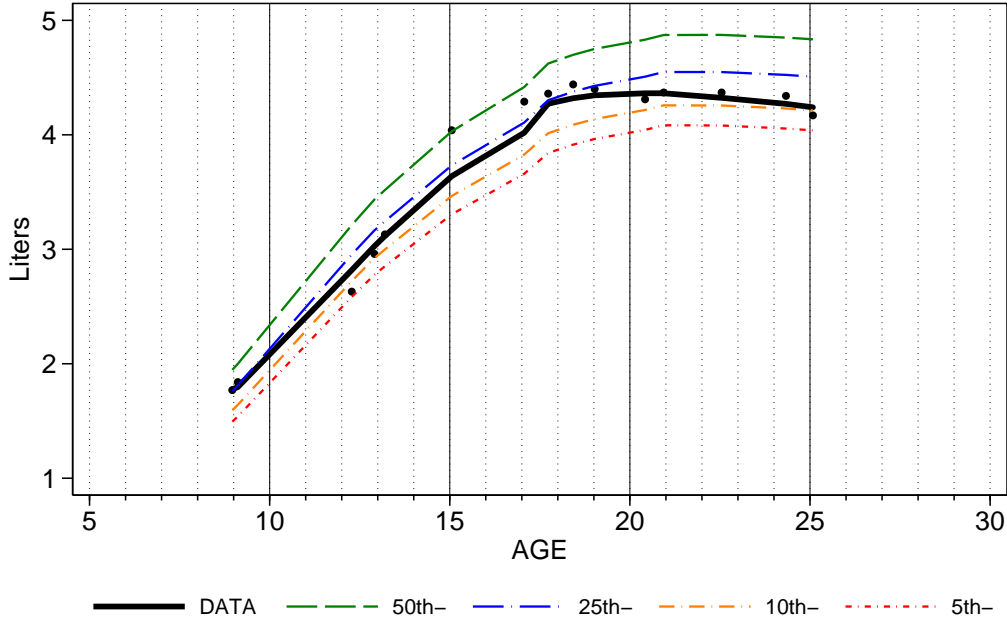

1143

**PATTERN OF GROWTH/DECLINE (Check One)**

- ( 1 ) Normal Growth
- ( 2 ) Normal Growth, Early Decline
- ( 3 ) Reduced Growth
- ( 4 ) Reduced Growth, Early Decline
- ( 9 ) Undetermined Pattern
- ( 8 ) Undetermined - not enough data

Maximum lung growth attained: ( 1 ) Yes ( 0 ) No

Plateau started: ( 2 ) No plateau ( 1 ) Yes ( 0 ) No

Decline started: ( 1 ) Yes ( 0 ) No

AGE AT each of the following periods (use '99' if N/A):

Maximum Lung Growth: \_\_\_\_ . \_\_\_\_

Start of Plateau: \_\_\_\_ . \_\_\_\_

Start of Decline: \_\_\_\_ . \_\_\_\_

### Pre-BD FEV1 Data and Percentiles: 1144

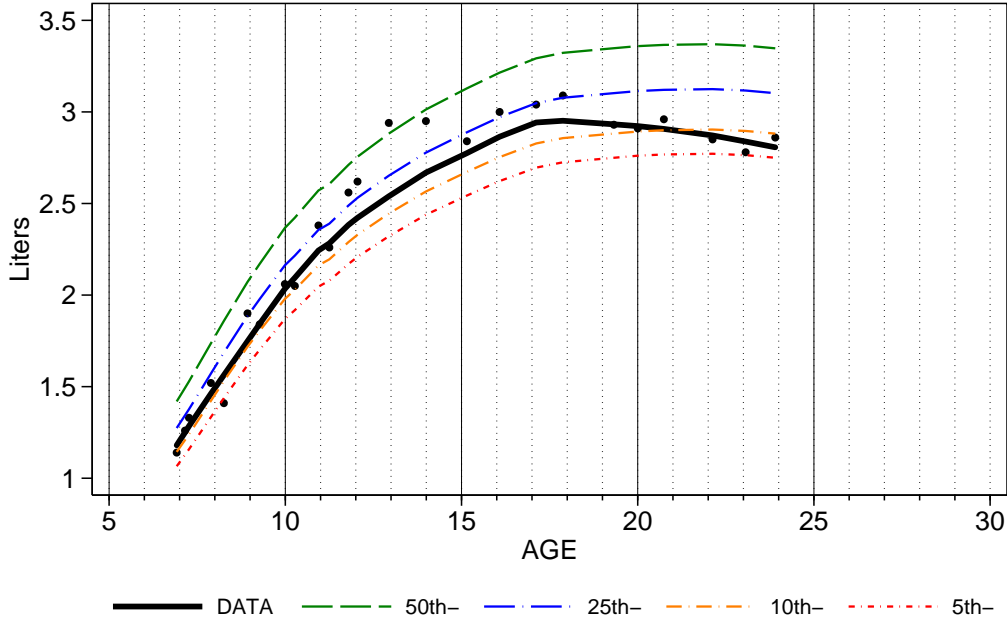

1144

**PATTERN OF GROWTH/DECLINE (Check One)**

- ( 1 ) Normal Growth
- ( 2 ) Normal Growth, Early Decline
- ( 3 ) Reduced Growth
- ( 4 ) Reduced Growth, Early Decline
- ( 9 ) Undetermined Pattern
- ( 8 ) Undetermined - not enough data

Maximum lung growth attained: ( 1 ) Yes ( 0 ) No

Plateau started: ( 2 ) No plateau ( 1 ) Yes ( 0 ) No

Decline started: ( 1 ) Yes ( 0 ) No

AGE AT each of the following periods (use '99' if N/A):

Maximum Lung Growth: \_\_\_\_ . \_\_\_\_

Start of Plateau: \_\_\_\_ . \_\_\_\_

Start of Decline: \_\_\_\_ . \_\_\_\_

### Pre-BD FEV1 Data and Percentiles: 1152

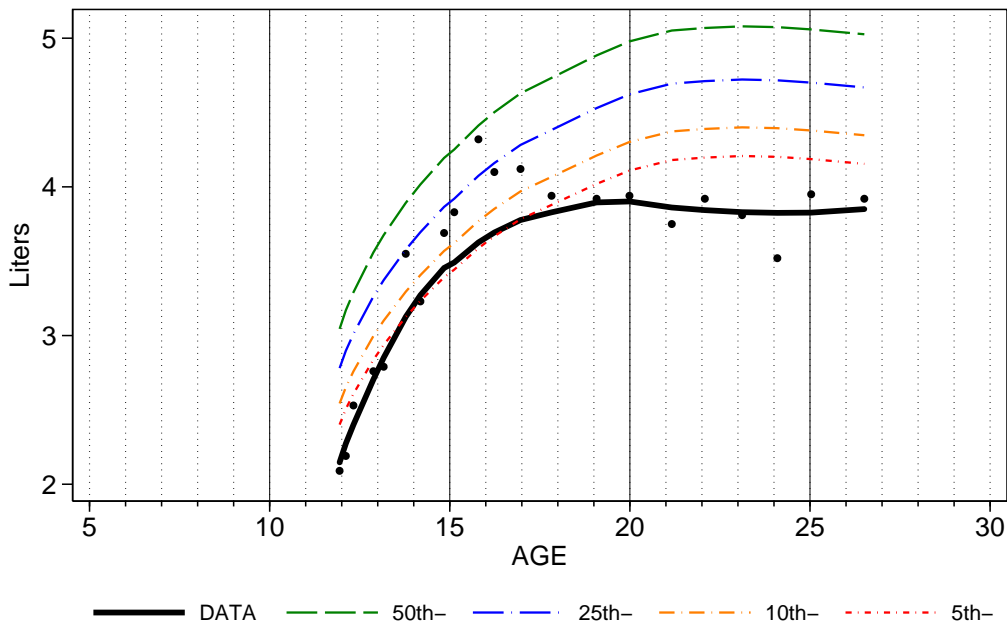

1152

**PATTERN OF GROWTH/DECLINE (Check One)**

- ( 1) Normal Growth
- ( 2) Normal Growth, Early Decline
- ( 3) Reduced Growth
- ( 4) Reduced Growth, Early Decline
- ( 9) Undetermined Pattern
- ( 8) Undetermined - not enough data

Maximum lung growth attained: ( 1) Yes ( 0) No

Plateau started: ( 2) No plateau ( 1) Yes ( 0) No

Decline started: ( 1) Yes ( 0) No

AGE AT each of the following periods (use '99' if N/A):

Maximum Lung Growth: \_\_\_\_ . \_\_\_\_

Start of Plateau: \_\_\_\_ . \_\_\_\_

Start of Decline: \_\_\_\_ . \_\_\_\_

### Pre-BD FEV1 Data and Percentiles: 1153

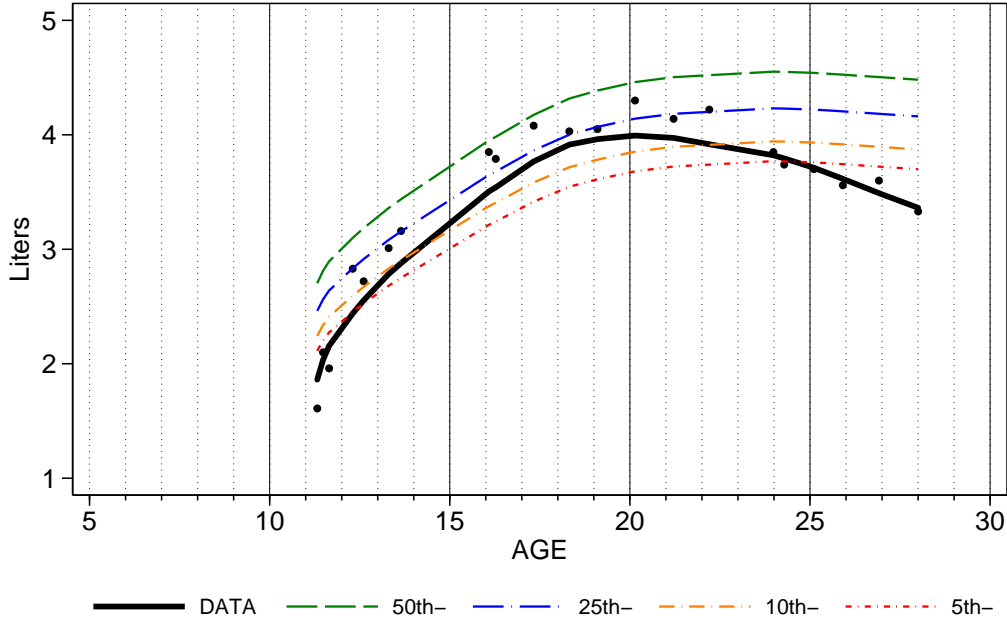

1153

**PATTERN OF GROWTH/DECLINE (Check One)**

- ( 1) Normal Growth
- ( 2) Normal Growth, Early Decline
- ( 3) Reduced Growth
- ( 4) Reduced Growth, Early Decline
- ( 9) Undetermined Pattern
- ( 8) Undetermined - not enough data

Maximum lung growth attained: ( 1) Yes ( 0) No

Plateau started: ( 2) No plateau ( 1) Yes ( 0) No

Decline started: ( 1) Yes ( 0) No

AGE AT each of the following periods (use '99' if N/A):

Maximum Lung Growth: \_\_\_\_ . \_\_\_\_

Start of Plateau: \_\_\_\_ . \_\_\_\_

Start of Decline: \_\_\_\_ . \_\_\_\_

### Pre-BD FEV1 Data and Percentiles: 1165

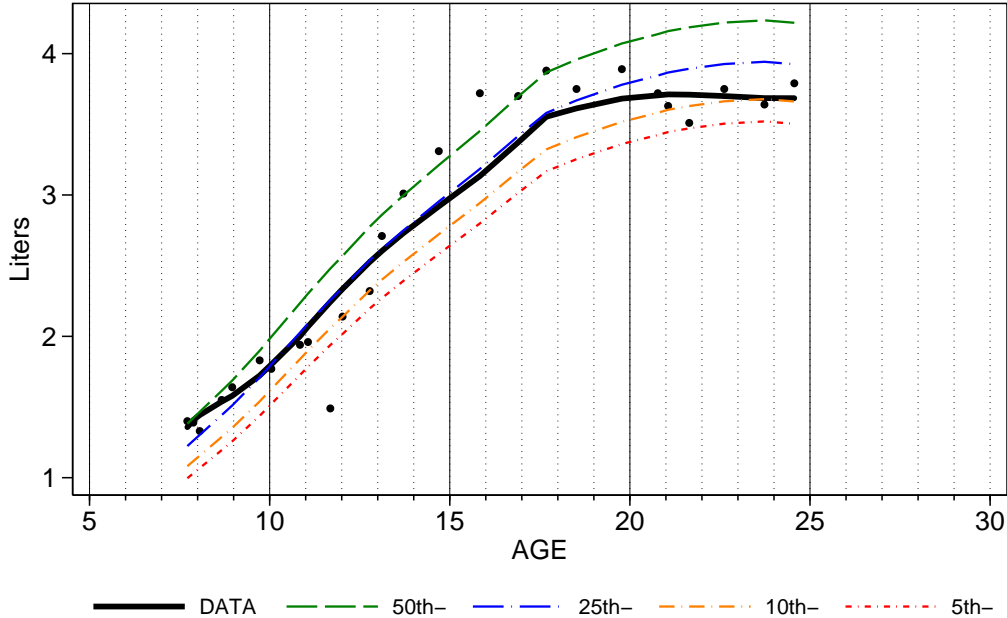

1165

**PATTERN OF GROWTH/DECLINE (Check One)**

- ( 1) Normal Growth
- ( 2) Normal Growth, Early Decline
- ( 3) Reduced Growth
- ( 4) Reduced Growth, Early Decline
- ( 9) Undetermined Pattern
- ( 8) Undetermined - not enough data

Maximum lung growth attained: ( 1) Yes ( 0) No

Plateau started: ( 2) No plateau ( 1) Yes ( 0) No

Decline started: ( 1) Yes ( 0) No

AGE AT each of the following periods (use '99' if N/A):

Maximum Lung Growth: \_\_\_\_ . \_\_\_\_

Start of Plateau: \_\_\_\_ . \_\_\_\_

Start of Decline: \_\_\_\_ . \_\_\_\_

### Pre-BD FEV1 Data and Percentiles: 1174

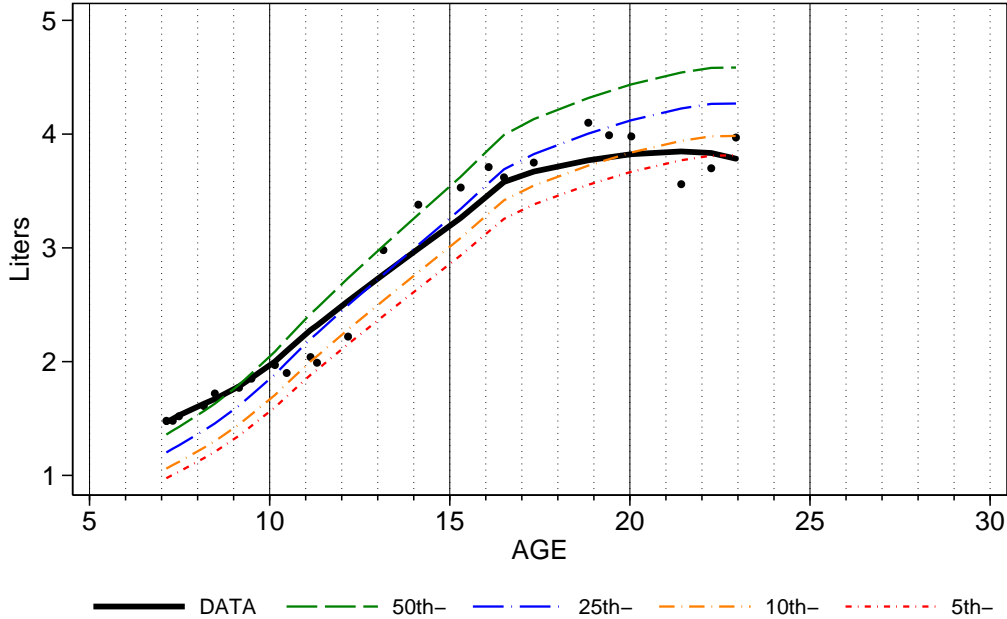

1174

**PATTERN OF GROWTH/DECLINE (Check One)**

- ( 1 ) Normal Growth
- ( 2 ) Normal Growth, Early Decline
- ( 3 ) Reduced Growth
- ( 4 ) Reduced Growth, Early Decline
- ( 9 ) Undetermined Pattern
- ( 8 ) Undetermined - not enough data

Maximum lung growth attained: ( 1 ) Yes ( 0 ) No

Plateau started: ( 2 ) No plateau ( 1 ) Yes ( 0 ) No

Decline started: ( 1 ) Yes ( 0 ) No

AGE AT each of the following periods (use '99' if N/A):

Maximum Lung Growth: \_\_\_\_ . \_\_\_\_

Start of Plateau: \_\_\_\_ . \_\_\_\_

Start of Decline: \_\_\_\_ . \_\_\_\_

### Pre-BD FEV1 Data and Percentiles: 1178

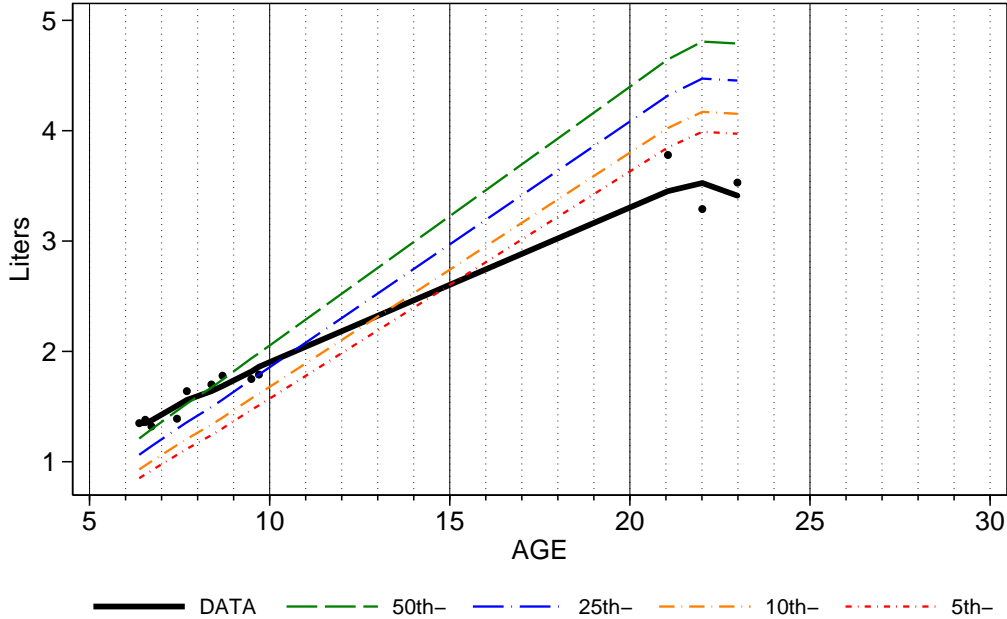

1178

**PATTERN OF GROWTH/DECLINE (Check One)**

- ( 1) Normal Growth
- ( 2) Normal Growth, Early Decline
- ( 3) Reduced Growth
- ( 4) Reduced Growth, Early Decline
- ( 9) Undetermined Pattern
- ( 8) Undetermined - not enough data

Maximum lung growth attained: ( 1) Yes ( 0) No

Plateau started: ( 2) No plateau ( 1) Yes ( 0) No

Decline started: ( 1) Yes ( 0) No

AGE AT each of the following periods (use '99' if N/A):

Maximum Lung Growth: \_\_\_\_ . \_\_\_\_

Start of Plateau: \_\_\_\_ . \_\_\_\_

Start of Decline: \_\_\_\_ . \_\_\_\_

### Pre-BD FEV1 Data and Percentiles: 1182

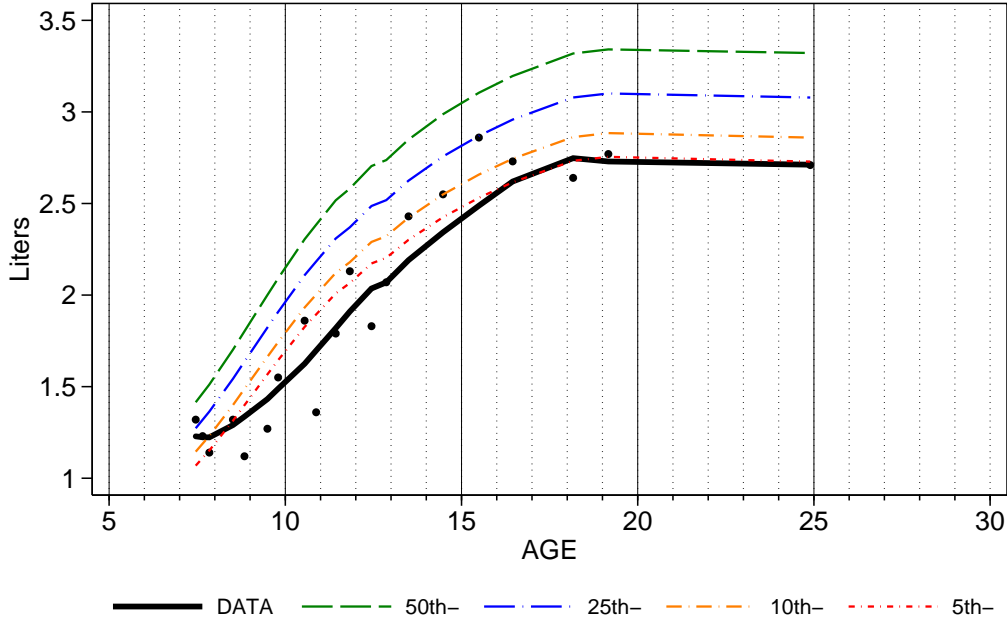

1182

**PATTERN OF GROWTH/DECLINE (Check One)**

- ( 1 ) Normal Growth
- ( 2 ) Normal Growth, Early Decline
- ( 3 ) Reduced Growth
- ( 4 ) Reduced Growth, Early Decline
- ( 9 ) Undetermined Pattern
- ( 8 ) Undetermined - not enough data

Maximum lung growth attained: ( 1 ) Yes ( 0 ) No

Plateau started: ( 2 ) No plateau ( 1 ) Yes ( 0 ) No

Decline started: ( 1 ) Yes ( 0 ) No

AGE AT each of the following periods (use '99' if N/A):

Maximum Lung Growth: \_\_\_\_ . \_\_\_\_

Start of Plateau: \_\_\_\_ . \_\_\_\_

Start of Decline: \_\_\_\_ . \_\_\_\_



### Pre-BD FEV1 Data and Percentiles: 1187

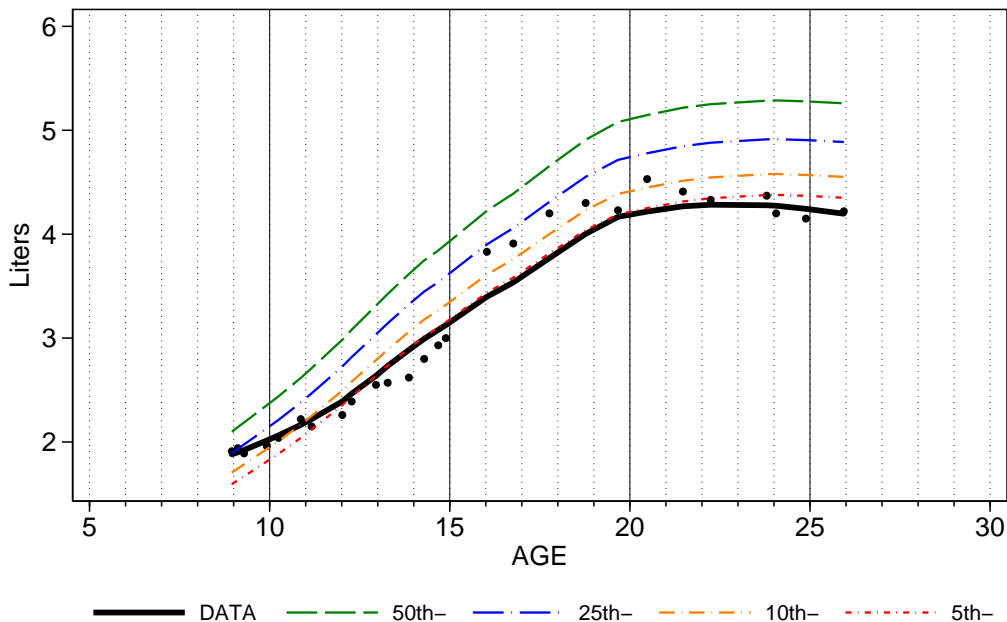

1187

**PATTERN OF GROWTH/DECLINE (Check One)**

- ( 1) Normal Growth
- ( 2) Normal Growth, Early Decline
- ( 3) Reduced Growth
- ( 4) Reduced Growth, Early Decline
- ( 9) Undetermined Pattern
- ( 8) Undetermined - not enough data

Maximum lung growth attained: ( 1) Yes ( 0) No

Plateau started: ( 2) No plateau ( 1) Yes ( 0) No

Decline started: ( 1) Yes ( 0) No

AGE AT each of the following periods (use '99' if N/A):

Maximum Lung Growth: \_\_\_\_ . \_\_\_\_

Start of Plateau: \_\_\_\_ . \_\_\_\_

Start of Decline: \_\_\_\_ . \_\_\_\_

### Pre-BD FEV1 Data and Percentiles: 1189

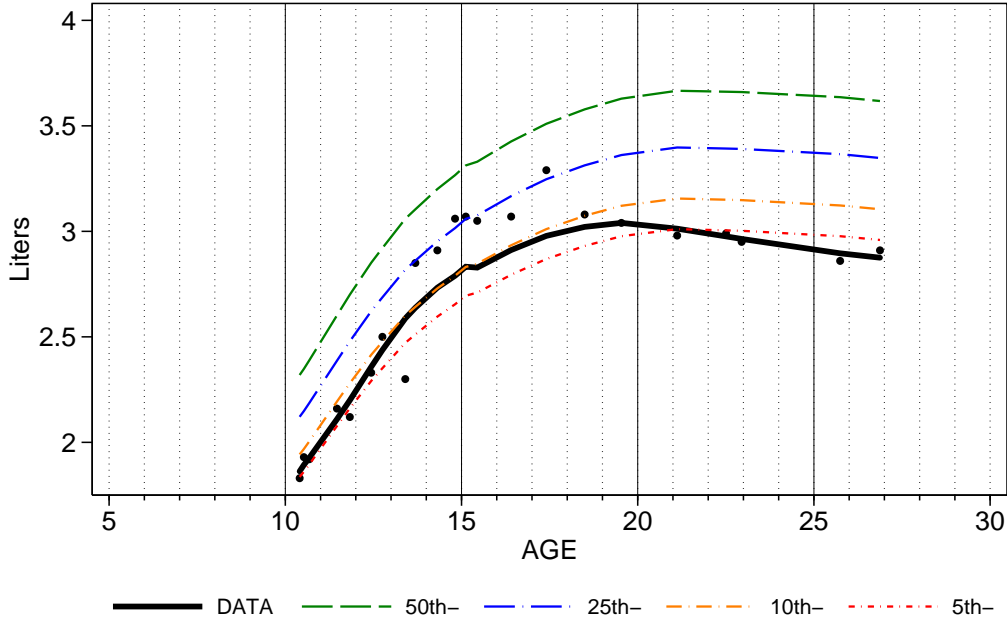

1189

**PATTERN OF GROWTH/DECLINE (Check One)**

- ( 1) Normal Growth
- ( 2) Normal Growth, Early Decline
- ( 3) Reduced Growth
- ( 4) Reduced Growth, Early Decline
- ( 9) Undetermined Pattern
- ( 8) Undetermined - not enough data

Maximum lung growth attained: ( 1) Yes ( 0) No

Plateau started: ( 2) No plateau ( 1) Yes ( 0) No

Decline started: ( 1) Yes ( 0) No

AGE AT each of the following periods (use '99' if N/A):

Maximum Lung Growth: \_\_\_\_ . \_\_\_\_

Start of Plateau: \_\_\_\_ . \_\_\_\_

Start of Decline: \_\_\_\_ . \_\_\_\_

### Pre-BD FEV1 Data and Percentiles: 1190

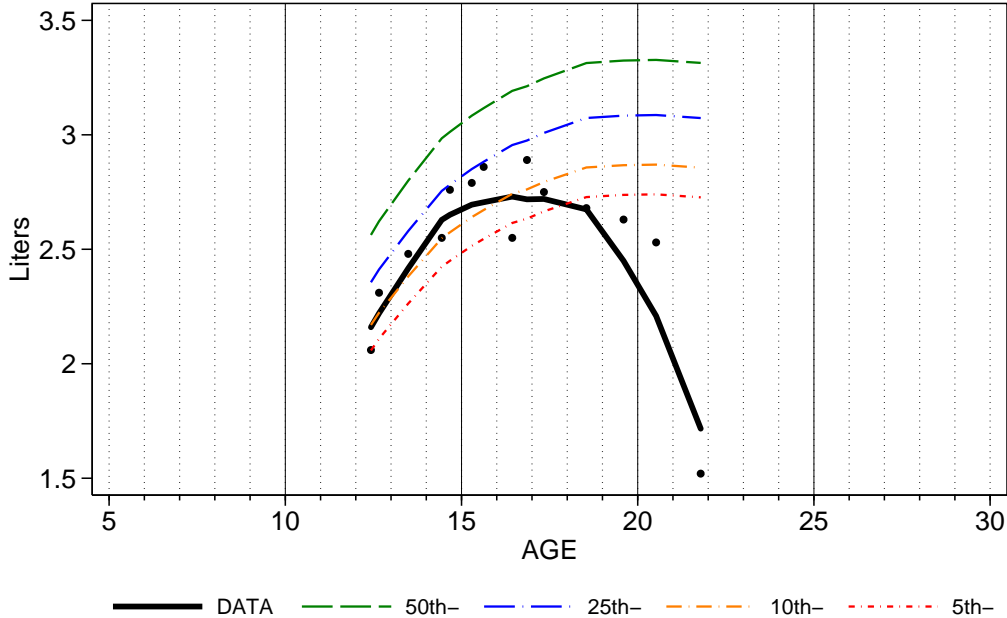

1190

**PATTERN OF GROWTH/DECLINE (Check One)**

- ( 1) Normal Growth
- ( 2) Normal Growth, Early Decline
- ( 3) Reduced Growth
- ( 4) Reduced Growth, Early Decline
- ( 9) Undetermined Pattern
- ( 8) Undetermined - not enough data

Maximum lung growth attained: ( 1) Yes ( 0) No

Plateau started: ( 2) No plateau ( 1) Yes ( 0) No

Decline started: ( 1) Yes ( 0) No

AGE AT each of the following periods (use '99' if N/A):

Maximum Lung Growth: \_\_\_\_ . \_\_\_\_

Start of Plateau: \_\_\_\_ . \_\_\_\_

Start of Decline: \_\_\_\_ . \_\_\_\_

### Pre-BD FEV1 Data and Percentiles: 1192

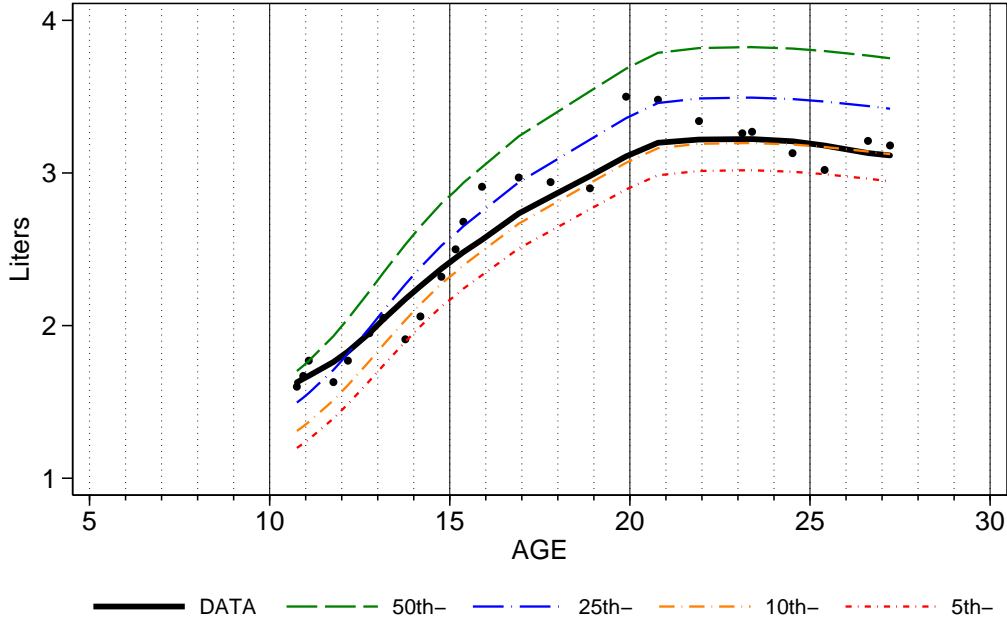

1192

**PATTERN OF GROWTH/DECLINE (Check One)**

- ( 1) Normal Growth
- ( 2) Normal Growth, Early Decline
- ( 3) Reduced Growth
- ( 4) Reduced Growth, Early Decline
- ( 9) Undetermined Pattern
- ( 8) Undetermined - not enough data

Maximum lung growth attained: ( 1) Yes ( 0) No

Plateau started: ( 2) No plateau ( 1) Yes ( 0) No

Decline started: ( 1) Yes ( 0) No

AGE AT each of the following periods (use '99' if N/A):

Maximum Lung Growth: \_\_\_\_ . \_\_\_\_

Start of Plateau: \_\_\_\_ . \_\_\_\_

Start of Decline: \_\_\_\_ . \_\_\_\_

### Pre-BD FEV1 Data and Percentiles: 1201

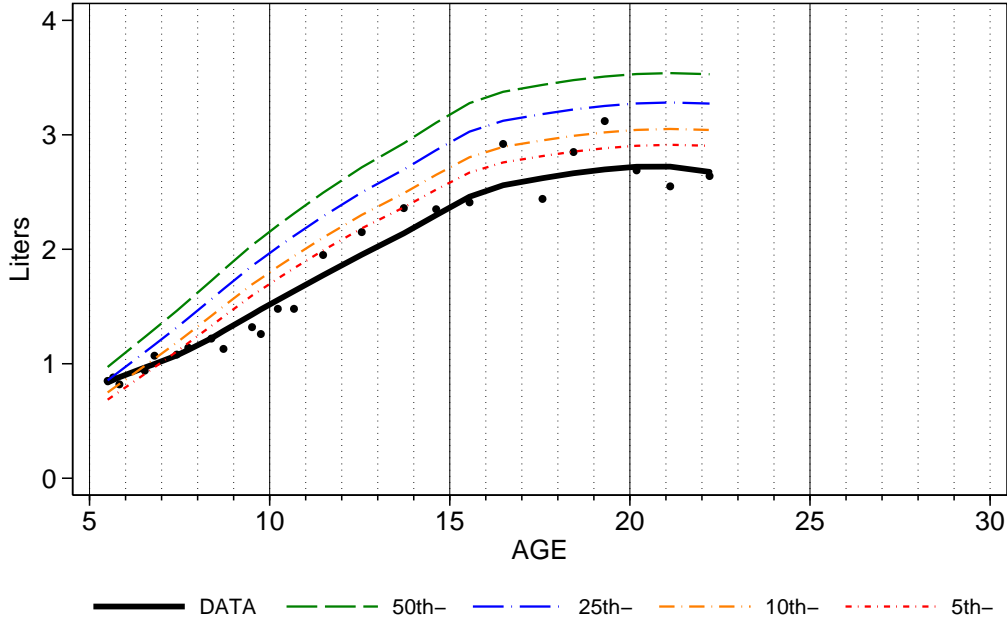

1201

**PATTERN OF GROWTH/DECLINE (Check One)**

- ( 1 ) Normal Growth
- ( 2 ) Normal Growth, Early Decline
- ( 3 ) Reduced Growth
- ( 4 ) Reduced Growth, Early Decline
- ( 9 ) Undetermined Pattern
- ( 8 ) Undetermined - not enough data

Maximum lung growth attained: ( 1 ) Yes ( 0 ) No

Plateau started: ( 2 ) No plateau ( 1 ) Yes ( 0 ) No

Decline started: ( 1 ) Yes ( 0 ) No

AGE AT each of the following periods (use '99' if N/A):

Maximum Lung Growth: \_\_\_\_ . \_\_\_\_

Start of Plateau: \_\_\_\_ . \_\_\_\_

Start of Decline: \_\_\_\_ . \_\_\_\_

### Pre-BD FEV1 Data and Percentiles: 1209

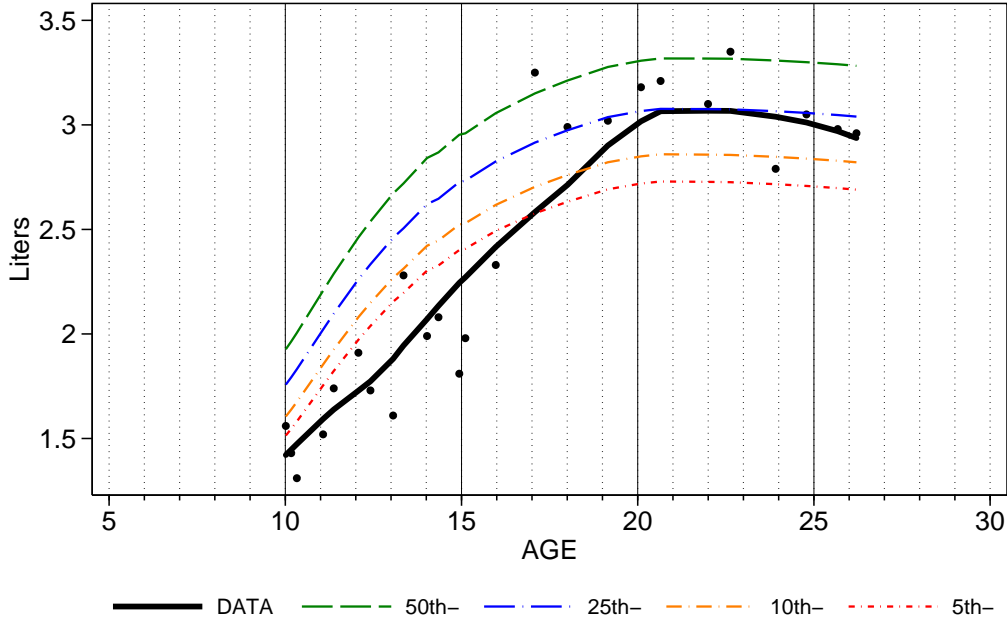

1209

**PATTERN OF GROWTH/DECLINE (Check One)**

- ( 1 ) Normal Growth
- ( 2 ) Normal Growth, Early Decline
- ( 3 ) Reduced Growth
- ( 4 ) Reduced Growth, Early Decline
- ( 9 ) Undetermined Pattern
- ( 8 ) Undetermined - not enough data

Maximum lung growth attained: ( 1 ) Yes ( 0 ) No

Plateau started: ( 2 ) No plateau ( 1 ) Yes ( 0 ) No

Decline started: ( 1 ) Yes ( 0 ) No

AGE AT each of the following periods (use '99' if N/A):

Maximum Lung Growth: \_\_\_\_ . \_\_\_\_

Start of Plateau: \_\_\_\_ . \_\_\_\_

Start of Decline: \_\_\_\_ . \_\_\_\_

### Pre-BD FEV1 Data and Percentiles: 1221

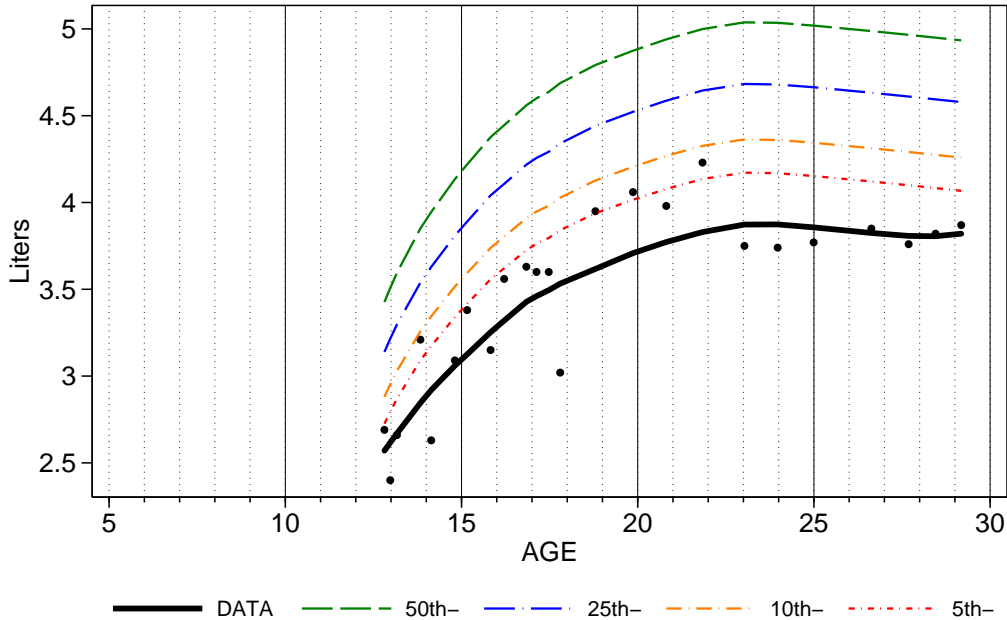

1221

**PATTERN OF GROWTH/DECLINE (Check One)**

- ( 1) Normal Growth
- ( 2) Normal Growth, Early Decline
- ( 3) Reduced Growth
- ( 4) Reduced Growth, Early Decline
- ( 9) Undetermined Pattern
- ( 8) Undetermined - not enough data

Maximum lung growth attained: ( 1) Yes ( 0) No

Plateau started: ( 2) No plateau ( 1) Yes ( 0) No

Decline started: ( 1) Yes ( 0) No

AGE AT each of the following periods (use '99' if N/A):

Maximum Lung Growth: \_\_\_\_ . \_\_\_\_

Start of Plateau: \_\_\_\_ . \_\_\_\_

Start of Decline: \_\_\_\_ . \_\_\_\_

### Pre-BD FEV1 Data and Percentiles: 1222

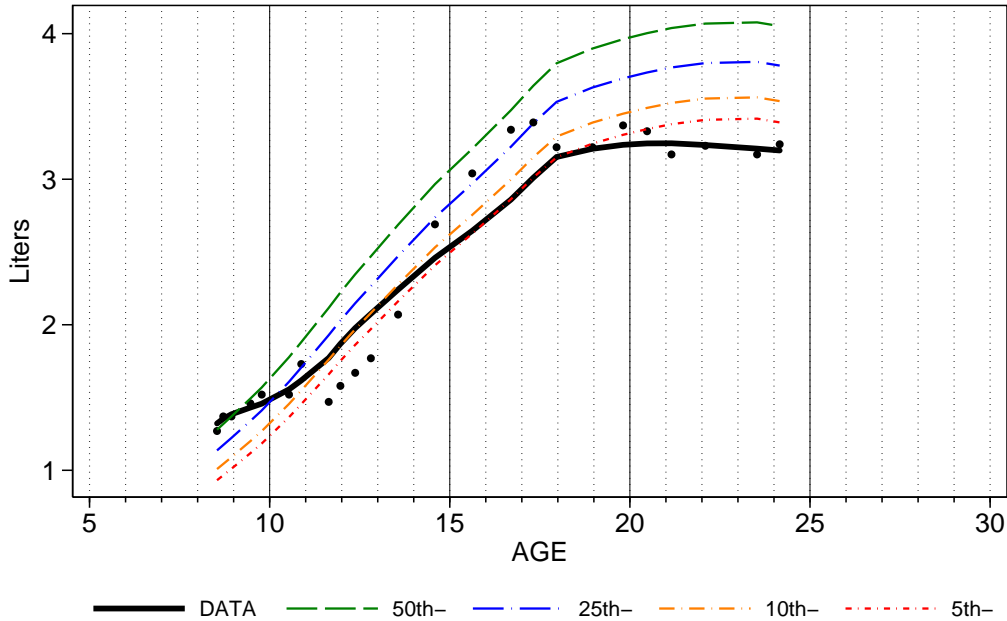

1222

**PATTERN OF GROWTH/DECLINE (Check One)**

- ( 1) Normal Growth
- ( 2) Normal Growth, Early Decline
- ( 3) Reduced Growth
- ( 4) Reduced Growth, Early Decline
- ( 9) Undetermined Pattern
- ( 8) Undetermined - not enough data

Maximum lung growth attained: ( 1) Yes ( 0) No

Plateau started: ( 2) No plateau ( 1) Yes ( 0) No

Decline started: ( 1) Yes ( 0) No

AGE AT each of the following periods (use '99' if N/A):

Maximum Lung Growth: \_\_\_\_ . \_\_\_\_

Start of Plateau: \_\_\_\_ . \_\_\_\_

Start of Decline: \_\_\_\_ . \_\_\_\_



### Pre-BD FEV1 Data and Percentiles: 1234

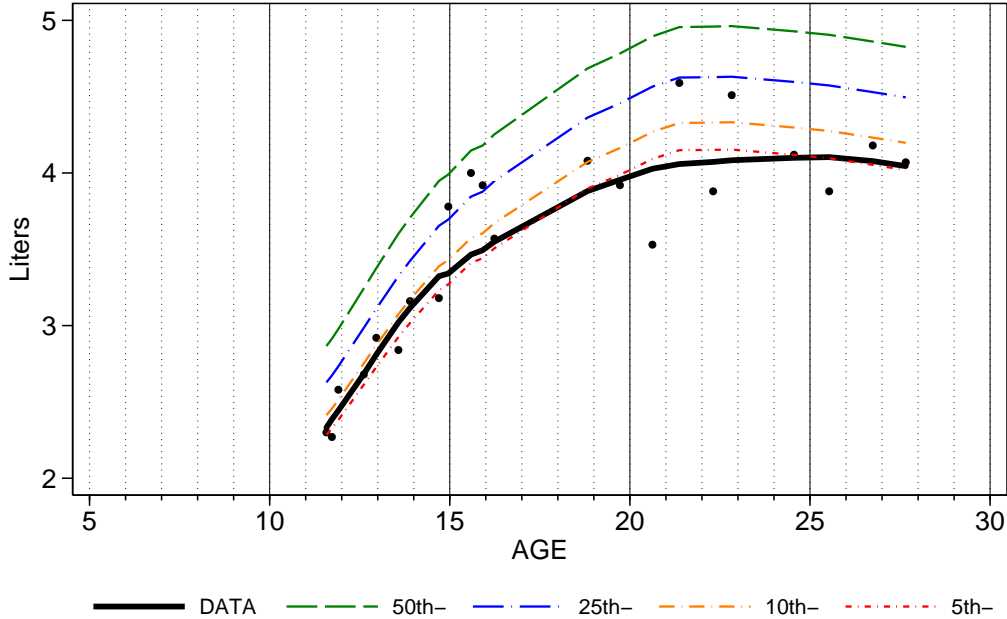

1234

**PATTERN OF GROWTH/DECLINE (Check One)**

- ( 1 ) Normal Growth
- ( 2 ) Normal Growth, Early Decline
- ( 3 ) Reduced Growth
- ( 4 ) Reduced Growth, Early Decline
- ( 9 ) Undetermined Pattern
- ( 8 ) Undetermined - not enough data

Maximum lung growth attained: ( 1 ) Yes ( 0 ) No

Plateau started: ( 2 ) No plateau ( 1 ) Yes ( 0 ) No

Decline started: ( 1 ) Yes ( 0 ) No

AGE AT each of the following periods (use '99' if N/A):

Maximum Lung Growth: \_\_\_\_ . \_\_\_\_

Start of Plateau: \_\_\_\_ . \_\_\_\_

Start of Decline: \_\_\_\_ . \_\_\_\_

### Pre-BD FEV1 Data and Percentiles: 1236

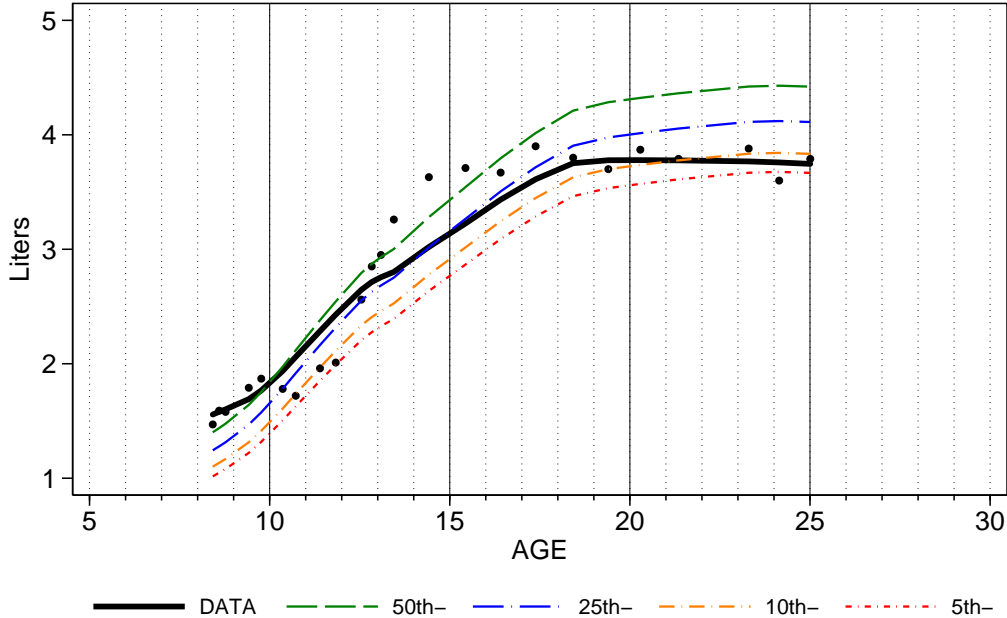

1236

**PATTERN OF GROWTH/DECLINE (Check One)**

- ( 1 ) Normal Growth
- ( 2 ) Normal Growth, Early Decline
- ( 3 ) Reduced Growth
- ( 4 ) Reduced Growth, Early Decline
- ( 9 ) Undetermined Pattern
- ( 8 ) Undetermined - not enough data

Maximum lung growth attained: ( 1 ) Yes ( 0 ) No

Plateau started: ( 2 ) No plateau ( 1 ) Yes ( 0 ) No

Decline started: ( 1 ) Yes ( 0 ) No

AGE AT each of the following periods (use '99' if N/A):

Maximum Lung Growth: \_\_\_\_ . \_\_\_\_

Start of Plateau: \_\_\_\_ . \_\_\_\_

Start of Decline: \_\_\_\_ . \_\_\_\_

### Pre-BD FEV1 Data and Percentiles: 1238

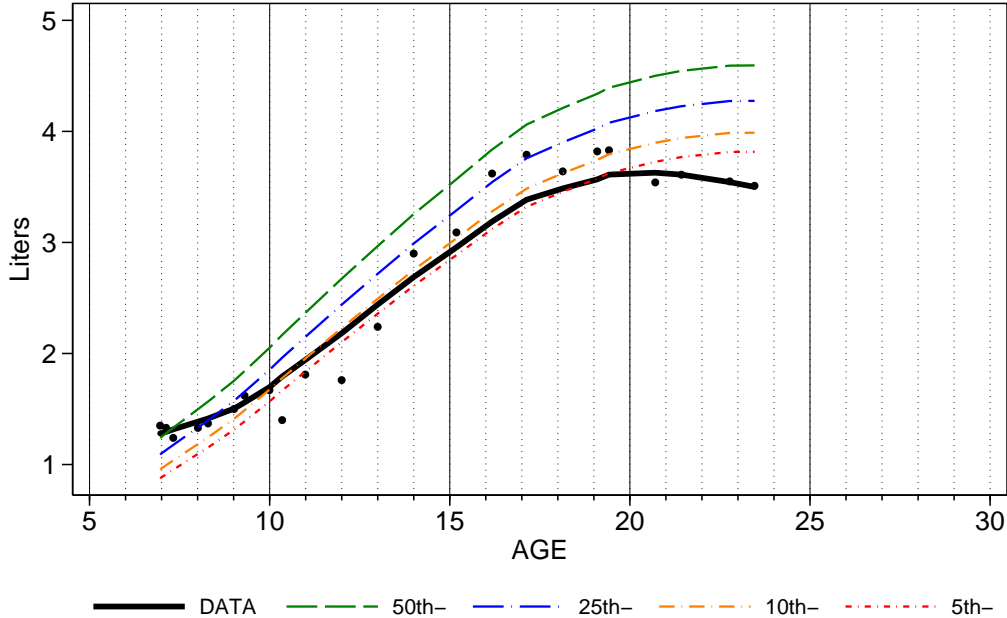

1238

**PATTERN OF GROWTH/DECLINE (Check One)**

- ( 1) Normal Growth
- ( 2) Normal Growth, Early Decline
- ( 3) Reduced Growth
- ( 4) Reduced Growth, Early Decline
- ( 9) Undetermined Pattern
- ( 8) Undetermined - not enough data

Maximum lung growth attained: ( 1) Yes ( 0) No

Plateau started: ( 2) No plateau ( 1) Yes ( 0) No

Decline started: ( 1) Yes ( 0) No

AGE AT each of the following periods (use '99' if N/A):

Maximum Lung Growth: \_\_\_\_ . \_\_\_\_

Start of Plateau: \_\_\_\_ . \_\_\_\_

Start of Decline: \_\_\_\_ . \_\_\_\_

### Pre-BD FEV1 Data and Percentiles: 1244

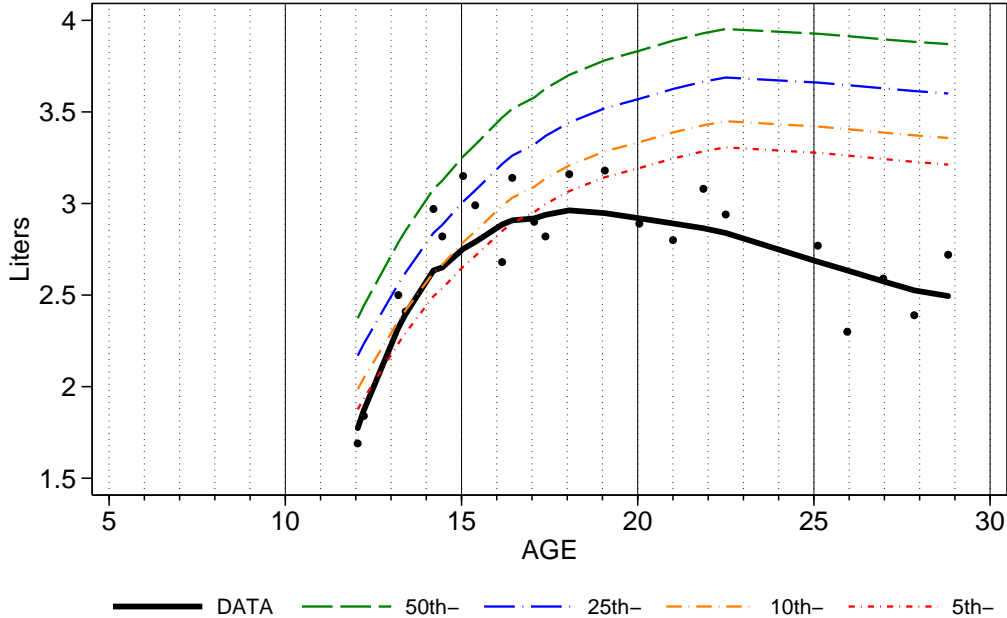

1244

**PATTERN OF GROWTH/DECLINE (Check One)**

- ( 1) Normal Growth
- ( 2) Normal Growth, Early Decline
- ( 3) Reduced Growth
- ( 4) Reduced Growth, Early Decline
- ( 9) Undetermined Pattern
- ( 8) Undetermined - not enough data

Maximum lung growth attained: ( 1) Yes ( 0) No

Plateau started: ( 2) No plateau ( 1) Yes ( 0) No

Decline started: ( 1) Yes ( 0) No

AGE AT each of the following periods (use '99' if N/A):

Maximum Lung Growth: \_\_\_\_ . \_\_\_\_

Start of Plateau: \_\_\_\_ . \_\_\_\_

Start of Decline: \_\_\_\_ . \_\_\_\_

### Pre-BD FEV1 Data and Percentiles: 1245

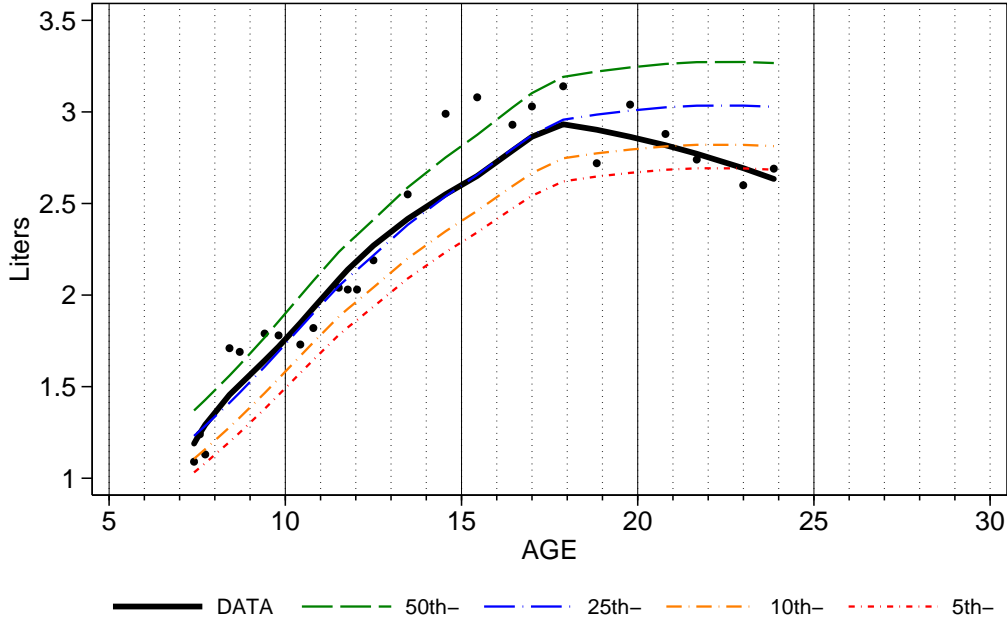

1245

**PATTERN OF GROWTH/DECLINE (Check One)**

- ( 1 ) Normal Growth
- ( 2 ) Normal Growth, Early Decline
- ( 3 ) Reduced Growth
- ( 4 ) Reduced Growth, Early Decline
- ( 9 ) Undetermined Pattern
- ( 8 ) Undetermined - not enough data

Maximum lung growth attained: ( 1 ) Yes ( 0 ) No

Plateau started: ( 2 ) No plateau ( 1 ) Yes ( 0 ) No

Decline started: ( 1 ) Yes ( 0 ) No

AGE AT each of the following periods (use '99' if N/A):

Maximum Lung Growth: \_\_\_\_ . \_\_\_\_

Start of Plateau: \_\_\_\_ . \_\_\_\_

Start of Decline: \_\_\_\_ . \_\_\_\_

### Pre-BD FEV1 Data and Percentiles: 1251

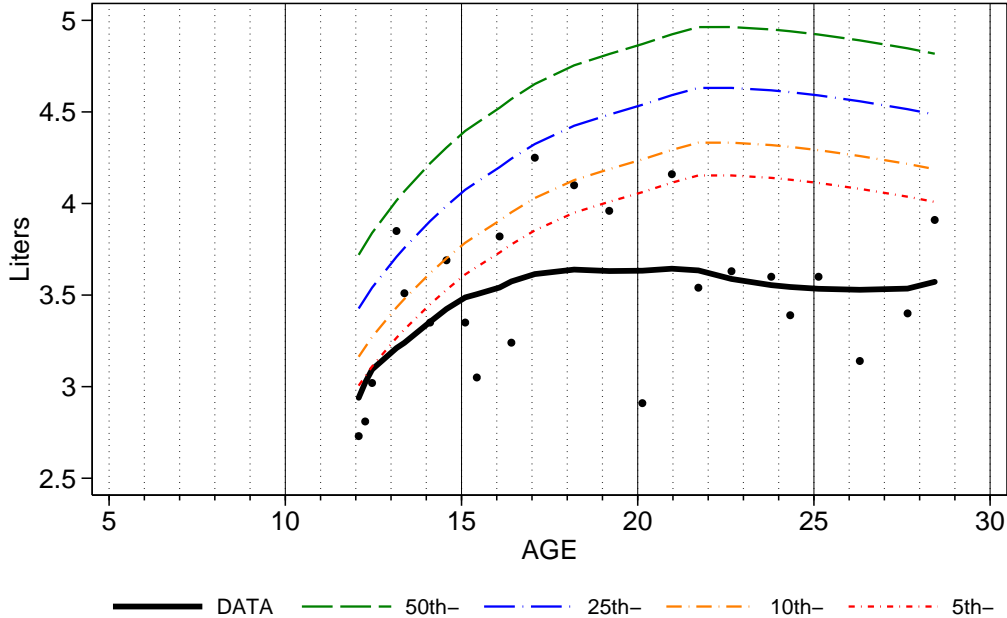

1251

**PATTERN OF GROWTH/DECLINE (Check One)**

- ( 1) Normal Growth
- ( 2) Normal Growth, Early Decline
- ( 3) Reduced Growth
- ( 4) Reduced Growth, Early Decline
- ( 9) Undetermined Pattern
- ( 8) Undetermined - not enough data

Maximum lung growth attained: ( 1) Yes ( 0) No

Plateau started: ( 2) No plateau ( 1) Yes ( 0) No

Decline started: ( 1) Yes ( 0) No

AGE AT each of the following periods (use '99' if N/A):

Maximum Lung Growth: \_\_\_\_ . \_\_\_\_

Start of Plateau: \_\_\_\_ . \_\_\_\_

Start of Decline: \_\_\_\_ . \_\_\_\_

### Pre-BD FEV1 Data and Percentiles: 1258

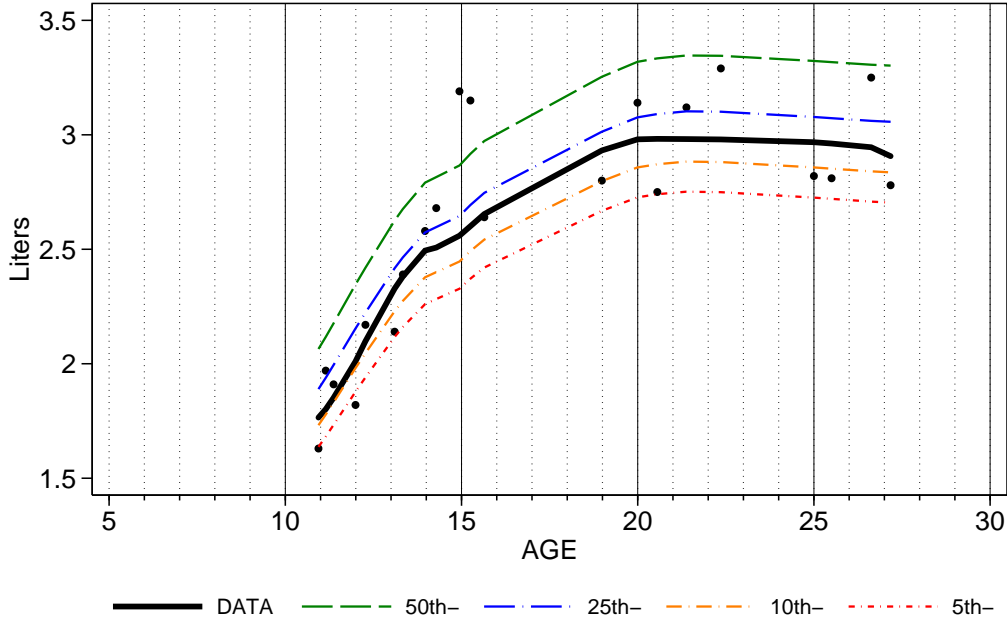

1258

**PATTERN OF GROWTH/DECLINE (Check One)**

- ( 1) Normal Growth
- ( 2) Normal Growth, Early Decline
- ( 3) Reduced Growth
- ( 4) Reduced Growth, Early Decline
- ( 9) Undetermined Pattern
- ( 8) Undetermined - not enough data

Maximum lung growth attained: ( 1) Yes ( 0) No

Plateau started: ( 2) No plateau ( 1) Yes ( 0) No

Decline started: ( 1) Yes ( 0) No

AGE AT each of the following periods (use '99' if N/A):

Maximum Lung Growth: \_\_\_\_ . \_\_\_\_

Start of Plateau: \_\_\_\_ . \_\_\_\_

Start of Decline: \_\_\_\_ . \_\_\_\_

### Pre-BD FEV1 Data and Percentiles: 1266

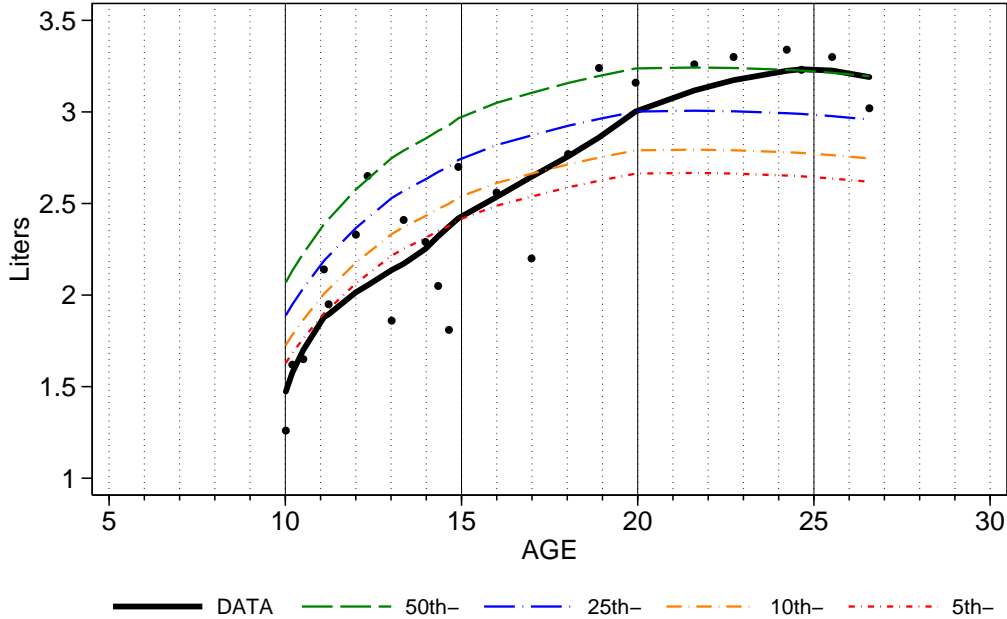

1266

**PATTERN OF GROWTH/DECLINE (Check One)**

- ( 1 ) Normal Growth
- ( 2 ) Normal Growth, Early Decline
- ( 3 ) Reduced Growth
- ( 4 ) Reduced Growth, Early Decline
- ( 9 ) Undetermined Pattern
- ( 8 ) Undetermined - not enough data

Maximum lung growth attained: ( 1 ) Yes ( 0 ) No

Plateau started: ( 2 ) No plateau ( 1 ) Yes ( 0 ) No

Decline started: ( 1 ) Yes ( 0 ) No

AGE AT each of the following periods (use '99' if N/A):

Maximum Lung Growth: \_\_\_\_ . \_\_\_\_

Start of Plateau: \_\_\_\_ . \_\_\_\_

Start of Decline: \_\_\_\_ . \_\_\_\_



### Pre-BD FEV1 Data and Percentiles: 1275

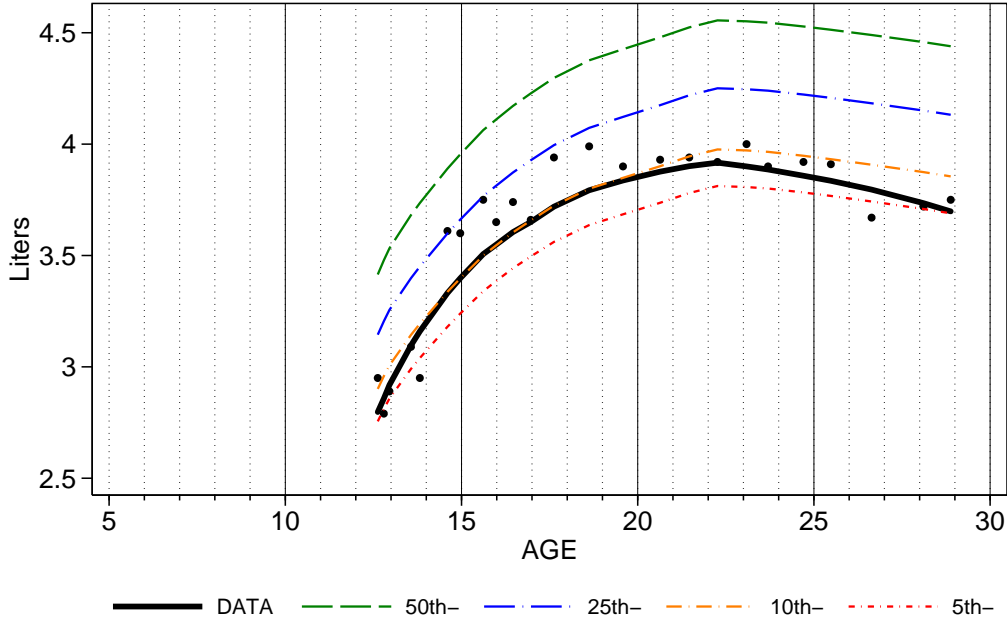

1275

**PATTERN OF GROWTH/DECLINE (Check One)**

- ( 1) Normal Growth
- ( 2) Normal Growth, Early Decline
- ( 3) Reduced Growth
- ( 4) Reduced Growth, Early Decline
- ( 9) Undetermined Pattern
- ( 8) Undetermined - not enough data

Maximum lung growth attained: ( 1) Yes ( 0) No

Plateau started: ( 2) No plateau ( 1) Yes ( 0) No

Decline started: ( 1) Yes ( 0) No

AGE AT each of the following periods (use '99' if N/A):

Maximum Lung Growth: \_\_\_\_ . \_\_\_\_

Start of Plateau: \_\_\_\_ . \_\_\_\_

Start of Decline: \_\_\_\_ . \_\_\_\_

### Pre-BD FEV1 Data and Percentiles: 1276

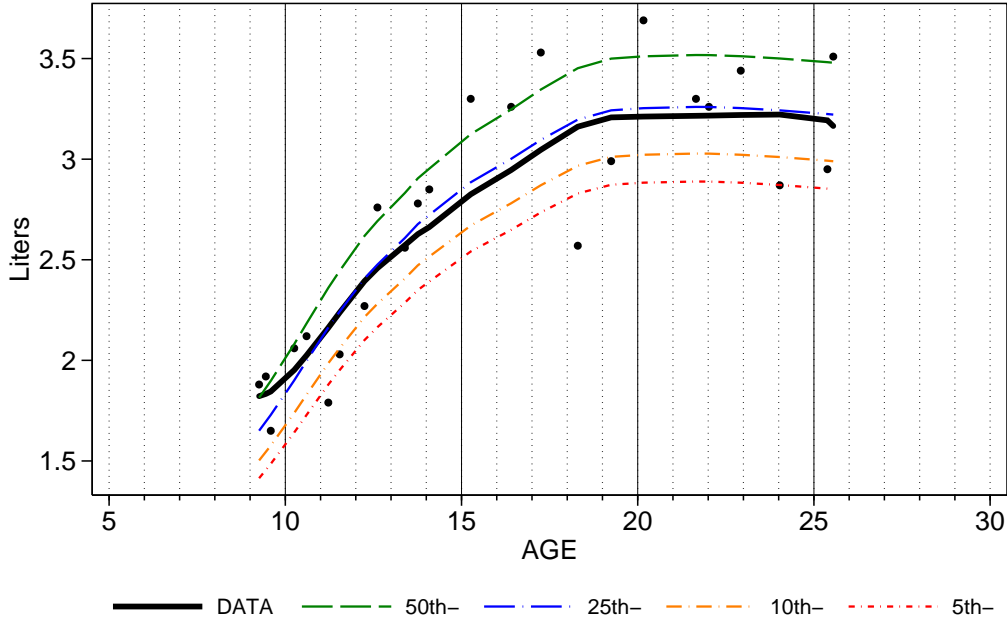

1276

**PATTERN OF GROWTH/DECLINE (Check One)**

- ( 1) Normal Growth
- ( 2) Normal Growth, Early Decline
- ( 3) Reduced Growth
- ( 4) Reduced Growth, Early Decline
- ( 9) Undetermined Pattern
- ( 8) Undetermined - not enough data

Maximum lung growth attained: ( 1) Yes ( 0) No

Plateau started: ( 2) No plateau ( 1) Yes ( 0) No

Decline started: ( 1) Yes ( 0) No

AGE AT each of the following periods (use '99' if N/A):

Maximum Lung Growth: \_\_\_\_ . \_\_\_\_

Start of Plateau: \_\_\_\_ . \_\_\_\_

Start of Decline: \_\_\_\_ . \_\_\_\_

### Pre-BD FEV1 Data and Percentiles: 1283

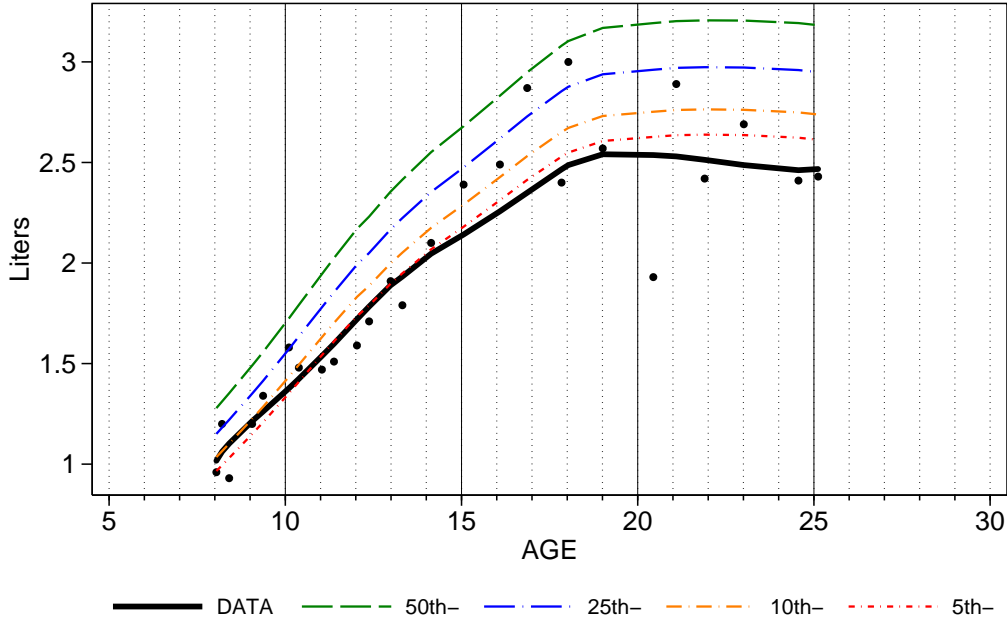

1283

**PATTERN OF GROWTH/DECLINE (Check One)**

- ( 1 ) Normal Growth
- ( 2 ) Normal Growth, Early Decline
- ( 3 ) Reduced Growth
- ( 4 ) Reduced Growth, Early Decline
- ( 9 ) Undetermined Pattern
- ( 8 ) Undetermined - not enough data

Maximum lung growth attained: ( 1 ) Yes ( 0 ) No

Plateau started: ( 2 ) No plateau ( 1 ) Yes ( 0 ) No

Decline started: ( 1 ) Yes ( 0 ) No

AGE AT each of the following periods (use '99' if N/A):

Maximum Lung Growth: \_\_\_\_ . \_\_\_\_

Start of Plateau: \_\_\_\_ . \_\_\_\_

Start of Decline: \_\_\_\_ . \_\_\_\_

### Pre-BD FEV1 Data and Percentiles: 1286

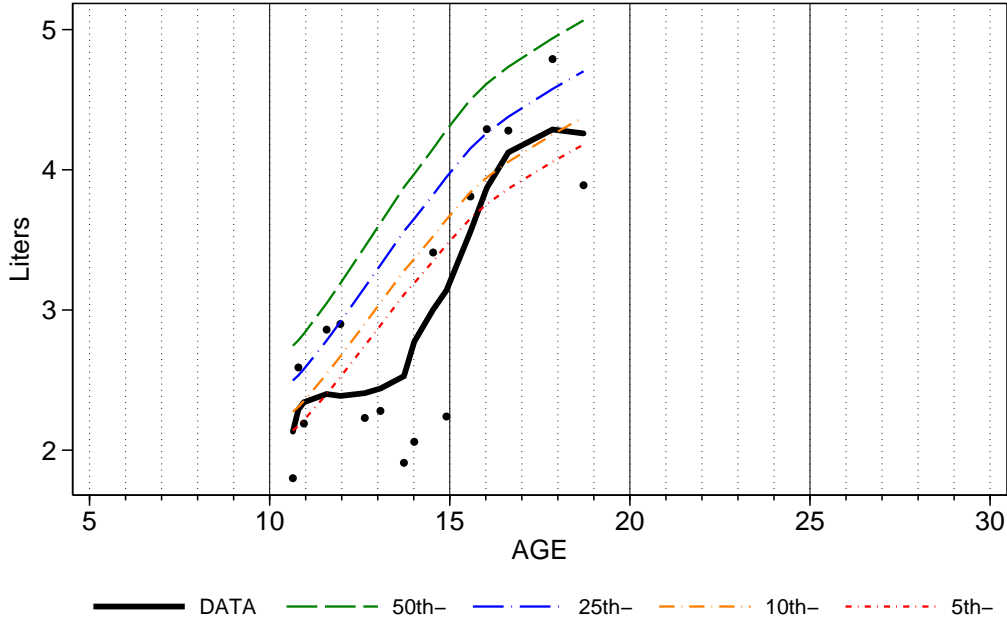

1286

**PATTERN OF GROWTH/DECLINE (Check One)**

- ( 1 ) Normal Growth
- ( 2 ) Normal Growth, Early Decline
- ( 3 ) Reduced Growth
- ( 4 ) Reduced Growth, Early Decline
- ( 9 ) Undetermined Pattern
- ( 8 ) Undetermined - not enough data

Maximum lung growth attained: ( 1 ) Yes ( 0 ) No

Plateau started: ( 2 ) No plateau ( 1 ) Yes ( 0 ) No

Decline started: ( 1 ) Yes ( 0 ) No

AGE AT each of the following periods (use '99' if N/A):

Maximum Lung Growth: \_\_\_\_ . \_\_\_\_

Start of Plateau: \_\_\_\_ . \_\_\_\_

Start of Decline: \_\_\_\_ . \_\_\_\_

### Pre-BD FEV1 Data and Percentiles: 1290

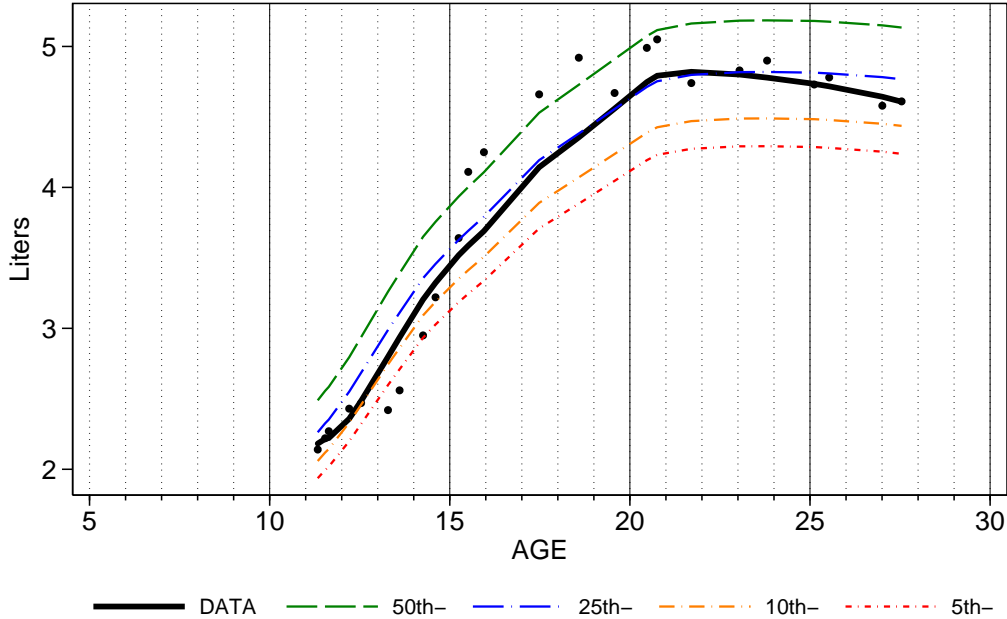

1290

**PATTERN OF GROWTH/DECLINE (Check One)**

- ( 1 ) Normal Growth
- ( 2 ) Normal Growth, Early Decline
- ( 3 ) Reduced Growth
- ( 4 ) Reduced Growth, Early Decline
- ( 9 ) Undetermined Pattern
- ( 8 ) Undetermined - not enough data

Maximum lung growth attained: ( 1 ) Yes ( 0 ) No

Plateau started: ( 2 ) No plateau ( 1 ) Yes ( 0 ) No

Decline started: ( 1 ) Yes ( 0 ) No

AGE AT each of the following periods (use '99' if N/A):

Maximum Lung Growth: \_\_\_\_ . \_\_\_\_

Start of Plateau: \_\_\_\_ . \_\_\_\_

Start of Decline: \_\_\_\_ . \_\_\_\_

### Pre-BD FEV1 Data and Percentiles: 1297

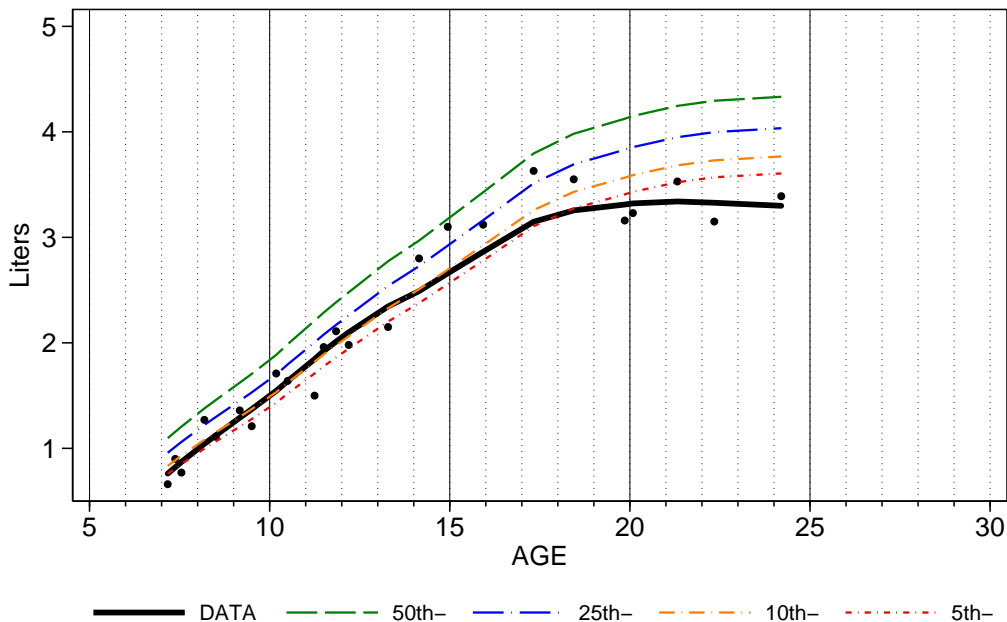

1297

**PATTERN OF GROWTH/DECLINE (Check One)**

- ( 1 ) Normal Growth
- ( 2 ) Normal Growth, Early Decline
- ( 3 ) Reduced Growth
- ( 4 ) Reduced Growth, Early Decline
- ( 9 ) Undetermined Pattern
- ( 8 ) Undetermined - not enough data

Maximum lung growth attained: ( 1 ) Yes ( 0 ) No

Plateau started: ( 2 ) No plateau ( 1 ) Yes ( 0 ) No

Decline started: ( 1 ) Yes ( 0 ) No

AGE AT each of the following periods (use '99' if N/A):

Maximum Lung Growth: \_\_\_\_ . \_\_\_\_

Start of Plateau: \_\_\_\_ . \_\_\_\_

Start of Decline: \_\_\_\_ . \_\_\_\_

### Pre-BD FEV1 Data and Percentiles: 1304

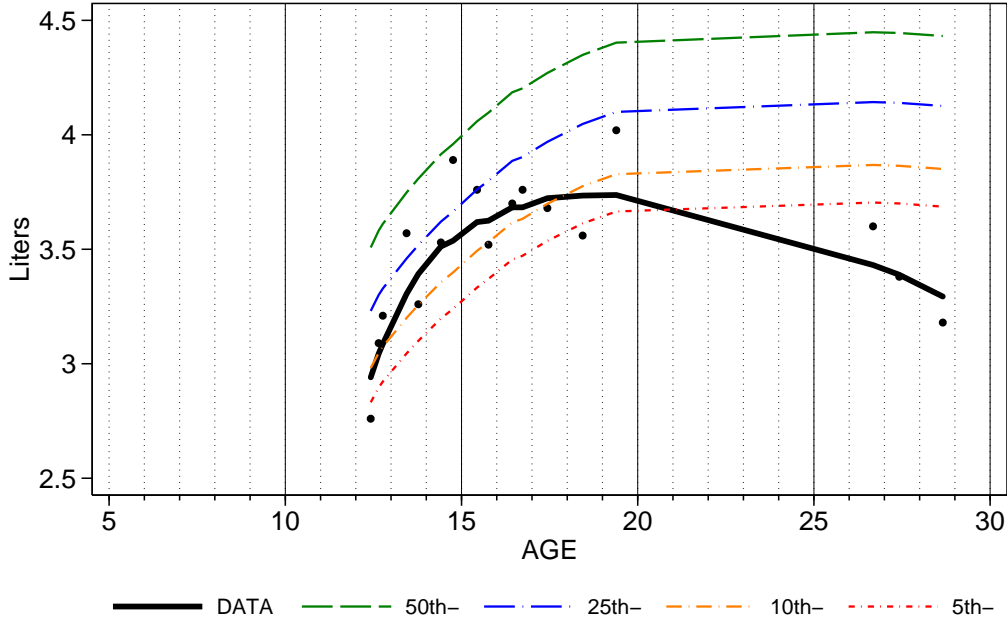

1304

**PATTERN OF GROWTH/DECLINE (Check One)**

- ( 1) Normal Growth
- ( 2) Normal Growth, Early Decline
- ( 3) Reduced Growth
- ( 4) Reduced Growth, Early Decline
- ( 9) Undetermined Pattern
- ( 8) Undetermined - not enough data

Maximum lung growth attained: ( 1) Yes ( 0) No

Plateau started: ( 2) No plateau ( 1) Yes ( 0) No

Decline started: ( 1) Yes ( 0) No

AGE AT each of the following periods (use '99' if N/A):

Maximum Lung Growth: \_\_\_\_ . \_\_\_\_

Start of Plateau: \_\_\_\_ . \_\_\_\_

Start of Decline: \_\_\_\_ . \_\_\_\_

### Pre-BD FEV1 Data and Percentiles: 1330

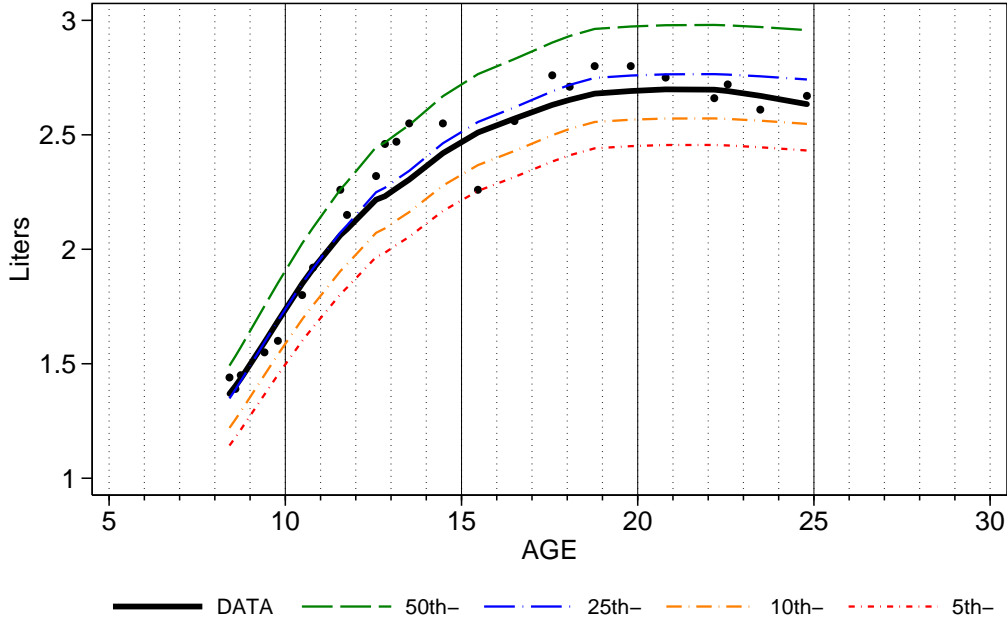

1330

**PATTERN OF GROWTH/DECLINE (Check One)**

- ( 1) Normal Growth
- ( 2) Normal Growth, Early Decline
- ( 3) Reduced Growth
- ( 4) Reduced Growth, Early Decline
- ( 9) Undetermined Pattern
- ( 8) Undetermined - not enough data

Maximum lung growth attained: ( 1) Yes ( 0) No

Plateau started: ( 2) No plateau ( 1) Yes ( 0) No

Decline started: ( 1) Yes ( 0) No

AGE AT each of the following periods (use '99' if N/A):

Maximum Lung Growth: \_\_\_\_ . \_\_\_\_

Start of Plateau: \_\_\_\_ . \_\_\_\_

Start of Decline: \_\_\_\_ . \_\_\_\_



### Pre-BD FEV1 Data and Percentiles: 1334

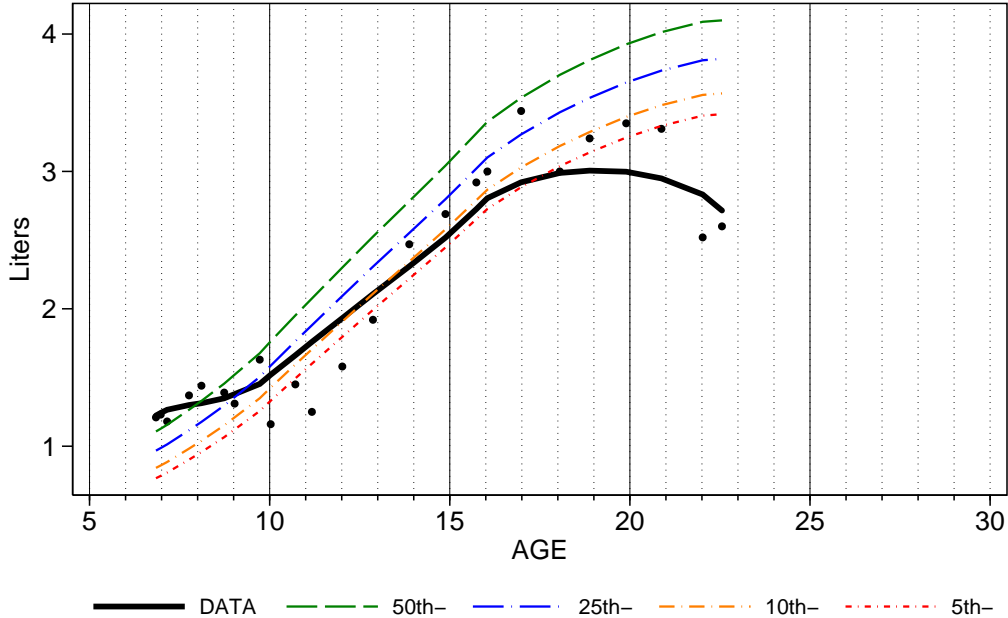

1334

**PATTERN OF GROWTH/DECLINE (Check One)**

- ( 1) Normal Growth
- ( 2) Normal Growth, Early Decline
- ( 3) Reduced Growth
- ( 4) Reduced Growth, Early Decline
- ( 9) Undetermined Pattern
- ( 8) Undetermined - not enough data

Maximum lung growth attained: ( 1) Yes ( 0) No

Plateau started: ( 2) No plateau ( 1) Yes ( 0) No

Decline started: ( 1) Yes ( 0) No

AGE AT each of the following periods (use '99' if N/A):

Maximum Lung Growth: \_\_\_\_ . \_\_\_\_

Start of Plateau: \_\_\_\_ . \_\_\_\_

Start of Decline: \_\_\_\_ . \_\_\_\_

### Pre-BD FEV1 Data and Percentiles: 1335

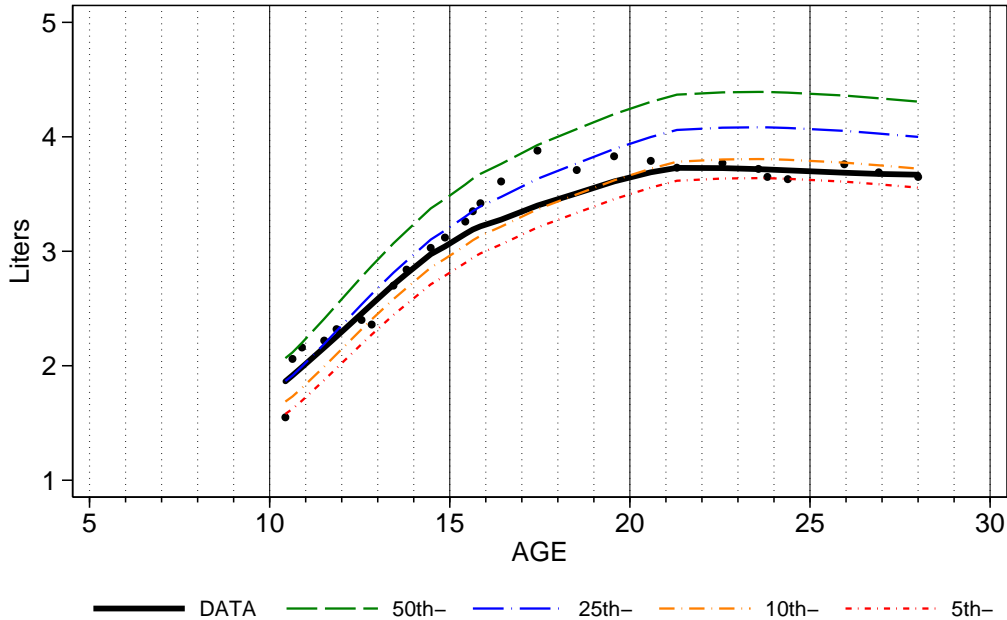

1335

**PATTERN OF GROWTH/DECLINE (Check One)**

- ( 1 ) Normal Growth
- ( 2 ) Normal Growth, Early Decline
- ( 3 ) Reduced Growth
- ( 4 ) Reduced Growth, Early Decline
- ( 9 ) Undetermined Pattern
- ( 8 ) Undetermined - not enough data

Maximum lung growth attained: ( 1 ) Yes ( 0 ) No

Plateau started: ( 2 ) No plateau ( 1 ) Yes ( 0 ) No

Decline started: ( 1 ) Yes ( 0 ) No

AGE AT each of the following periods (use '99' if N/A):

Maximum Lung Growth: \_\_\_\_ . \_\_\_\_

Start of Plateau: \_\_\_\_ . \_\_\_\_

Start of Decline: \_\_\_\_ . \_\_\_\_

### Pre-BD FEV1 Data and Percentiles: 1338

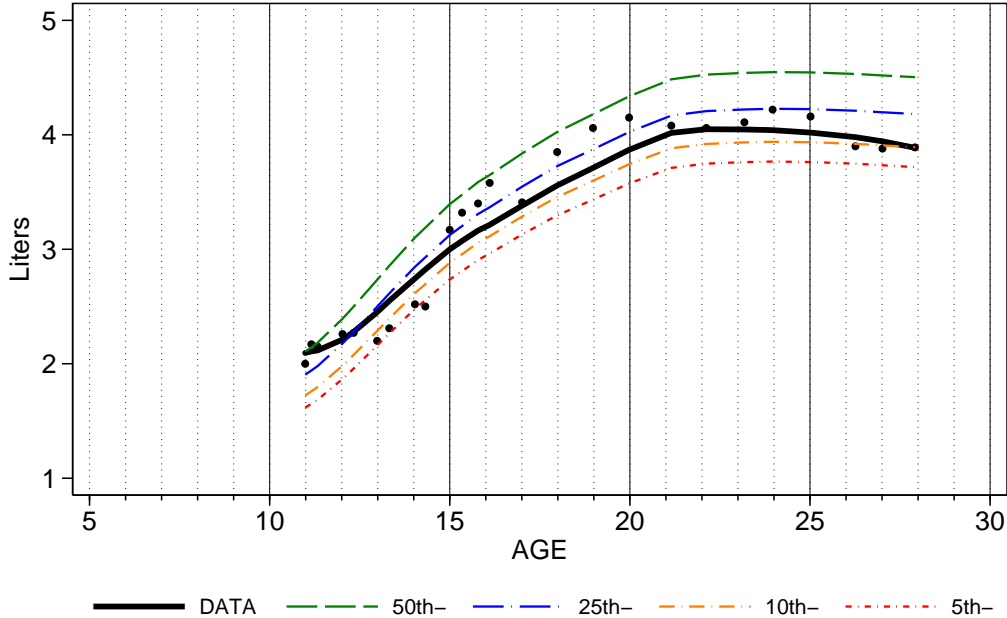

1338

**PATTERN OF GROWTH/DECLINE (Check One)**

- ( 1 ) Normal Growth
- ( 2 ) Normal Growth, Early Decline
- ( 3 ) Reduced Growth
- ( 4 ) Reduced Growth, Early Decline
- ( 9 ) Undetermined Pattern
- ( 8 ) Undetermined - not enough data

Maximum lung growth attained: ( 1 ) Yes ( 0 ) No

Plateau started: ( 2 ) No plateau ( 1 ) Yes ( 0 ) No

Decline started: ( 1 ) Yes ( 0 ) No

AGE AT each of the following periods (use '99' if N/A):

Maximum Lung Growth: \_\_\_\_ . \_\_\_\_

Start of Plateau: \_\_\_\_ . \_\_\_\_

Start of Decline: \_\_\_\_ . \_\_\_\_

### Pre-BD FEV1 Data and Percentiles: 1345

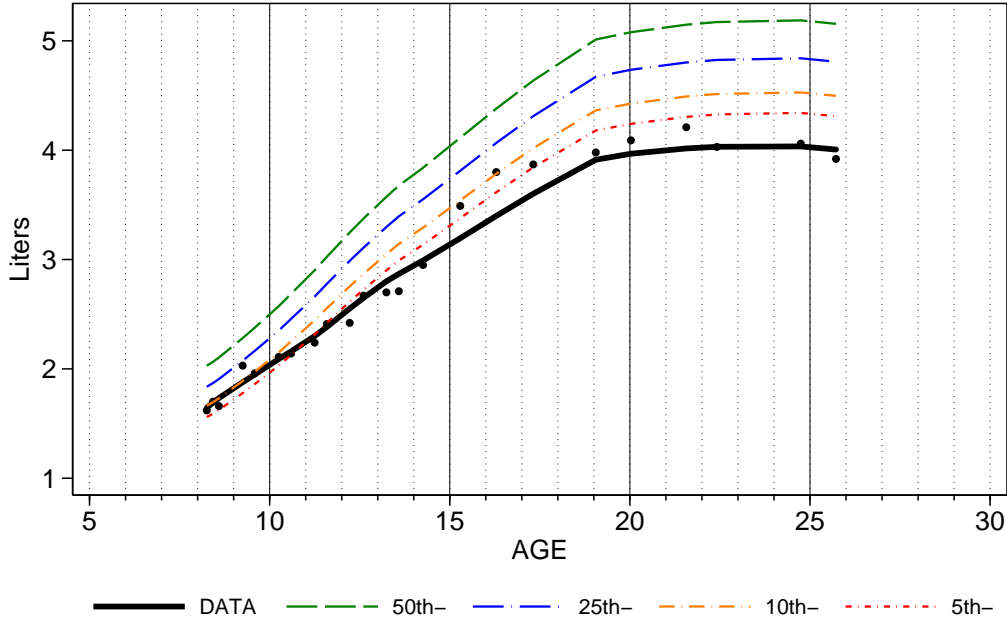

1345

**PATTERN OF GROWTH/DECLINE (Check One)**

- ( 1 ) Normal Growth
- ( 2 ) Normal Growth, Early Decline
- ( 3 ) Reduced Growth
- ( 4 ) Reduced Growth, Early Decline
- ( 9 ) Undetermined Pattern
- ( 8 ) Undetermined - not enough data

Maximum lung growth attained: ( 1 ) Yes ( 0 ) No

Plateau started: ( 2 ) No plateau ( 1 ) Yes ( 0 ) No

Decline started: ( 1 ) Yes ( 0 ) No

AGE AT each of the following periods (use '99' if N/A):

Maximum Lung Growth: \_\_\_\_ . \_\_\_\_

Start of Plateau: \_\_\_\_ . \_\_\_\_

Start of Decline: \_\_\_\_ . \_\_\_\_

### Pre-BD FEV1 Data and Percentiles: 1348

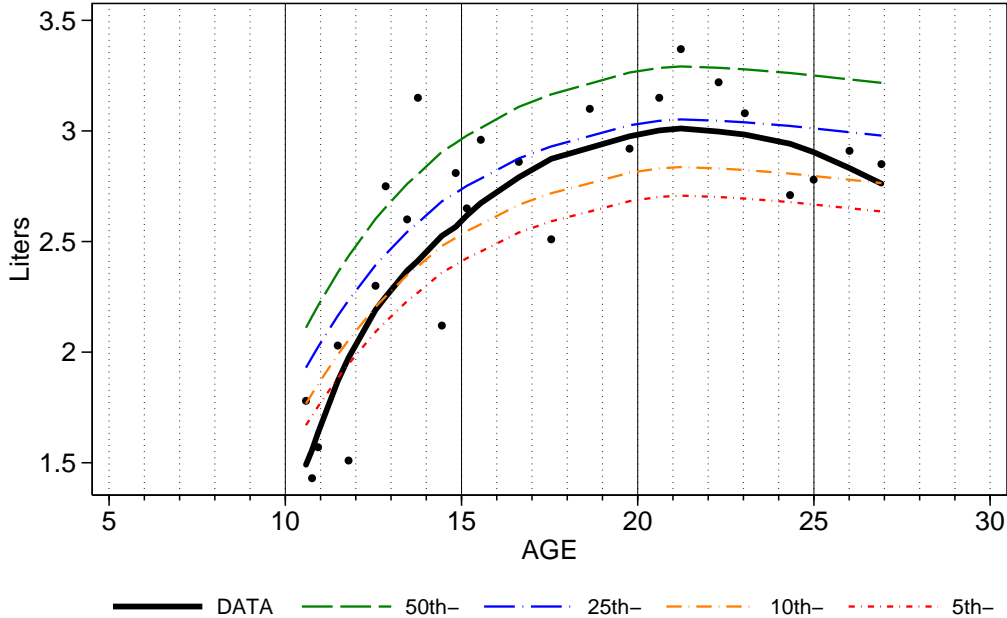

1348

**PATTERN OF GROWTH/DECLINE (Check One)**

- ( 1) Normal Growth
- ( 2) Normal Growth, Early Decline
- ( 3) Reduced Growth
- ( 4) Reduced Growth, Early Decline
- ( 9) Undetermined Pattern
- ( 8) Undetermined - not enough data

Maximum lung growth attained: ( 1) Yes ( 0) No

Plateau started: ( 2) No plateau ( 1) Yes ( 0) No

Decline started: ( 1) Yes ( 0) No

AGE AT each of the following periods (use '99' if N/A):

Maximum Lung Growth: \_\_\_\_ . \_\_\_\_

Start of Plateau: \_\_\_\_ . \_\_\_\_

Start of Decline: \_\_\_\_ . \_\_\_\_

### Pre-BD FEV1 Data and Percentiles: 1371

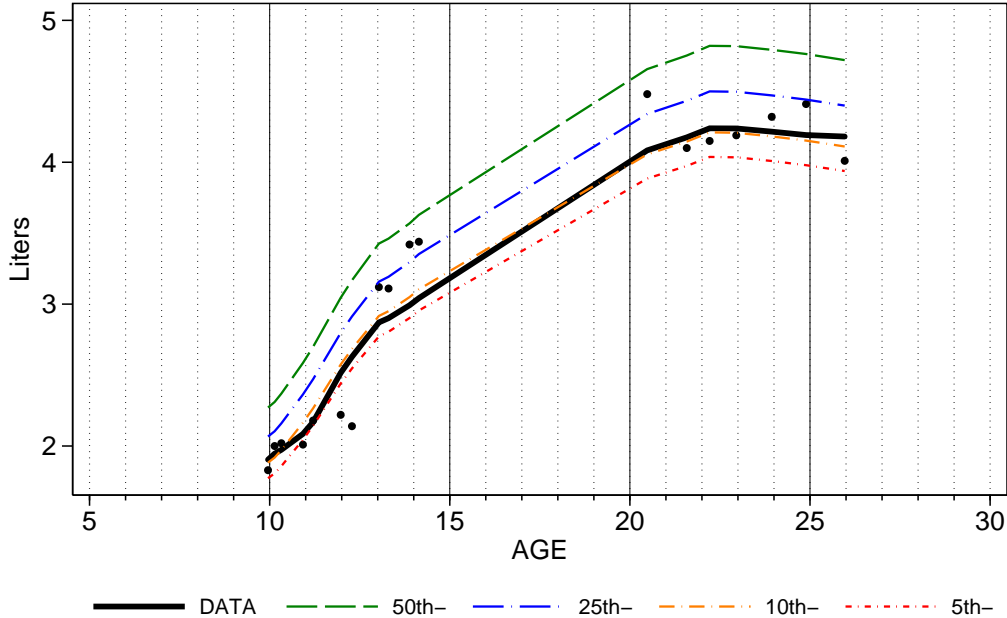

1371

**PATTERN OF GROWTH/DECLINE (Check One)**

- ( 1) Normal Growth
- ( 2) Normal Growth, Early Decline
- ( 3) Reduced Growth
- ( 4) Reduced Growth, Early Decline
- ( 9) Undetermined Pattern
- ( 8) Undetermined - not enough data

Maximum lung growth attained: ( 1) Yes ( 0) No

Plateau started: ( 2) No plateau ( 1) Yes ( 0) No

Decline started: ( 1) Yes ( 0) No

AGE AT each of the following periods (use '99' if N/A):

Maximum Lung Growth: \_\_\_\_ . \_\_\_\_

Start of Plateau: \_\_\_\_ . \_\_\_\_

Start of Decline: \_\_\_\_ . \_\_\_\_

### Pre-BD FEV1 Data and Percentiles: 1373

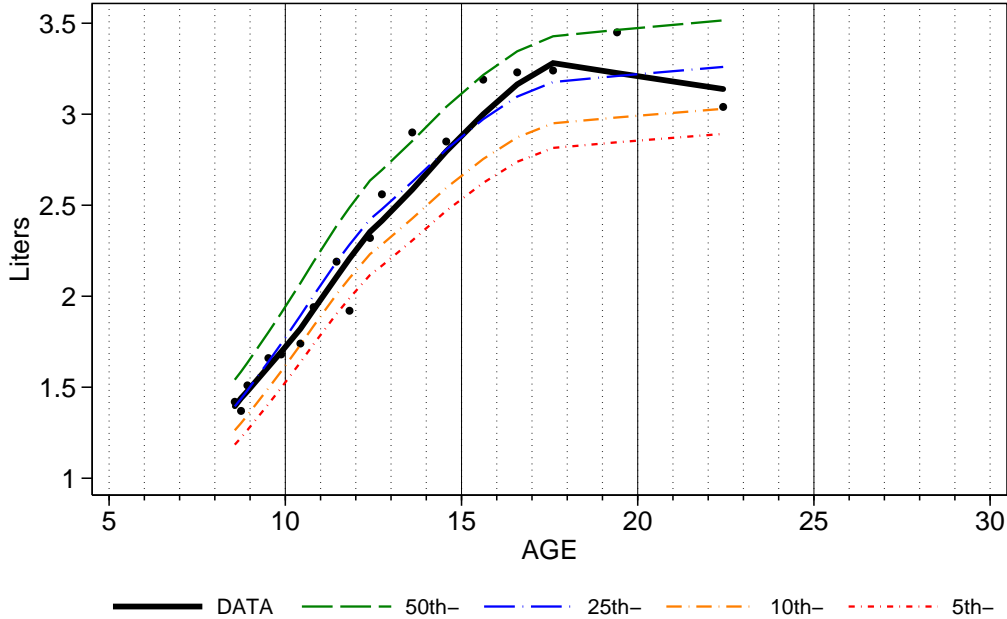

1373

**PATTERN OF GROWTH/DECLINE (Check One)**

- ( 1) Normal Growth
- ( 2) Normal Growth, Early Decline
- ( 3) Reduced Growth
- ( 4) Reduced Growth, Early Decline
- ( 9) Undetermined Pattern
- ( 8) Undetermined - not enough data

Maximum lung growth attained: ( 1) Yes ( 0) No

Plateau started: ( 2) No plateau ( 1) Yes ( 0) No

Decline started: ( 1) Yes ( 0) No

AGE AT each of the following periods (use '99' if N/A):

Maximum Lung Growth: \_\_\_\_ . \_\_\_\_

Start of Plateau: \_\_\_\_ . \_\_\_\_

Start of Decline: \_\_\_\_ . \_\_\_\_

### Pre-BD FEV1 Data and Percentiles: 1378

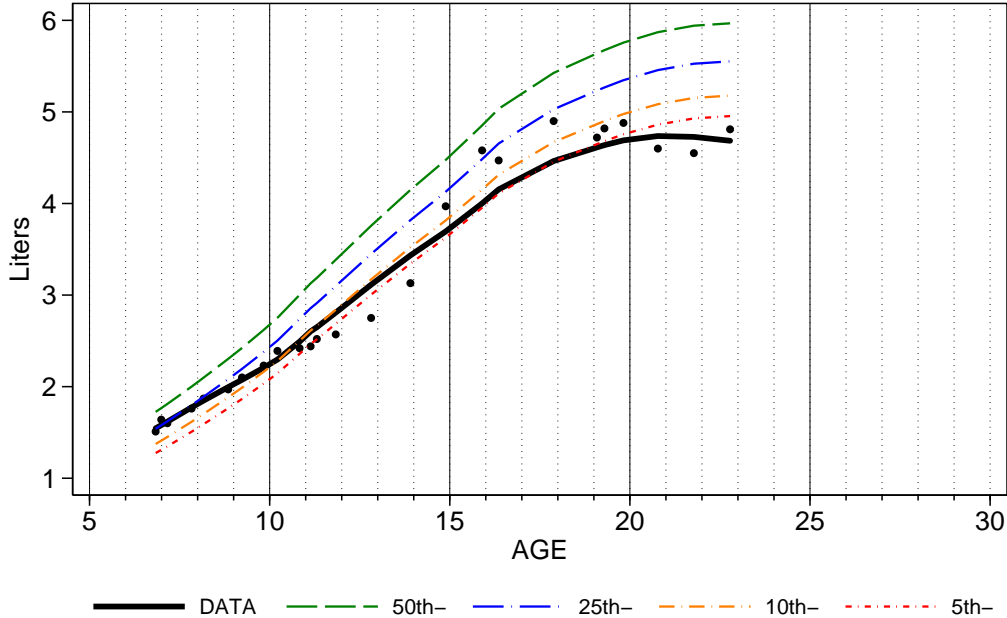

1378

**PATTERN OF GROWTH/DECLINE (Check One)**

- ( 1 ) Normal Growth
- ( 2 ) Normal Growth, Early Decline
- ( 3 ) Reduced Growth
- ( 4 ) Reduced Growth, Early Decline
- ( 9 ) Undetermined Pattern
- ( 8 ) Undetermined - not enough data

Maximum lung growth attained: ( 1 ) Yes ( 0 ) No

Plateau started: ( 2 ) No plateau ( 1 ) Yes ( 0 ) No

Decline started: ( 1 ) Yes ( 0 ) No

AGE AT each of the following periods (use '99' if N/A):

Maximum Lung Growth: \_\_\_\_ . \_\_\_\_

Start of Plateau: \_\_\_\_ . \_\_\_\_

Start of Decline: \_\_\_\_ . \_\_\_\_



### Pre-BD FEV1 Data and Percentiles: 1382

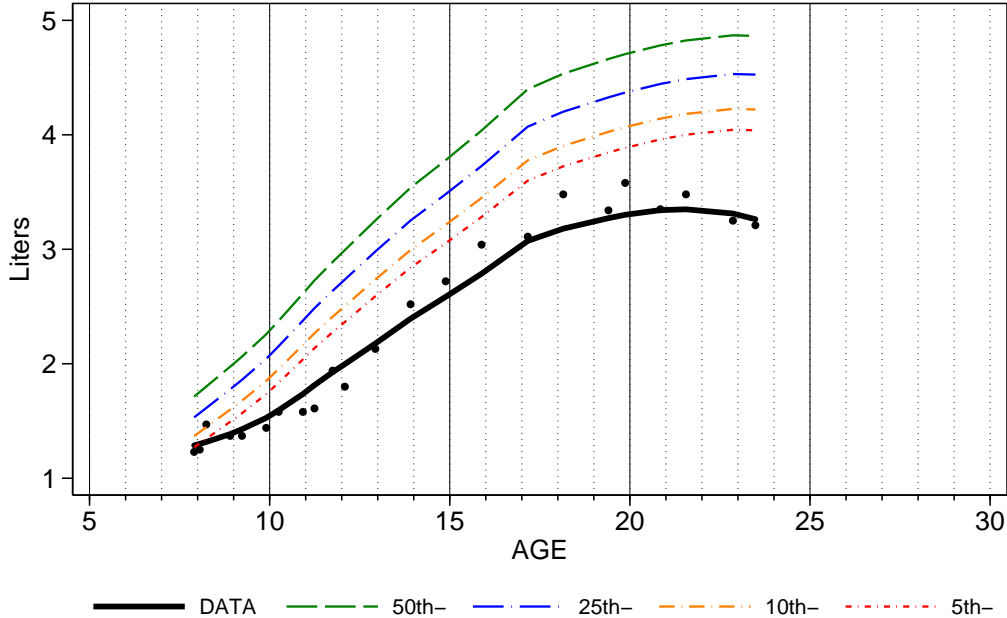

1382

**PATTERN OF GROWTH/DECLINE (Check One)**

- ( 1) Normal Growth
- ( 2) Normal Growth, Early Decline
- ( 3) Reduced Growth
- ( 4) Reduced Growth, Early Decline
- ( 9) Undetermined Pattern
- ( 8) Undetermined - not enough data

Maximum lung growth attained: ( 1) Yes ( 0) No

Plateau started: ( 2) No plateau ( 1) Yes ( 0) No

Decline started: ( 1) Yes ( 0) No

AGE AT each of the following periods (use '99' if N/A):

Maximum Lung Growth: \_\_\_\_ . \_\_\_\_

Start of Plateau: \_\_\_\_ . \_\_\_\_

Start of Decline: \_\_\_\_ . \_\_\_\_

### Pre-BD FEV1 Data and Percentiles: 1387

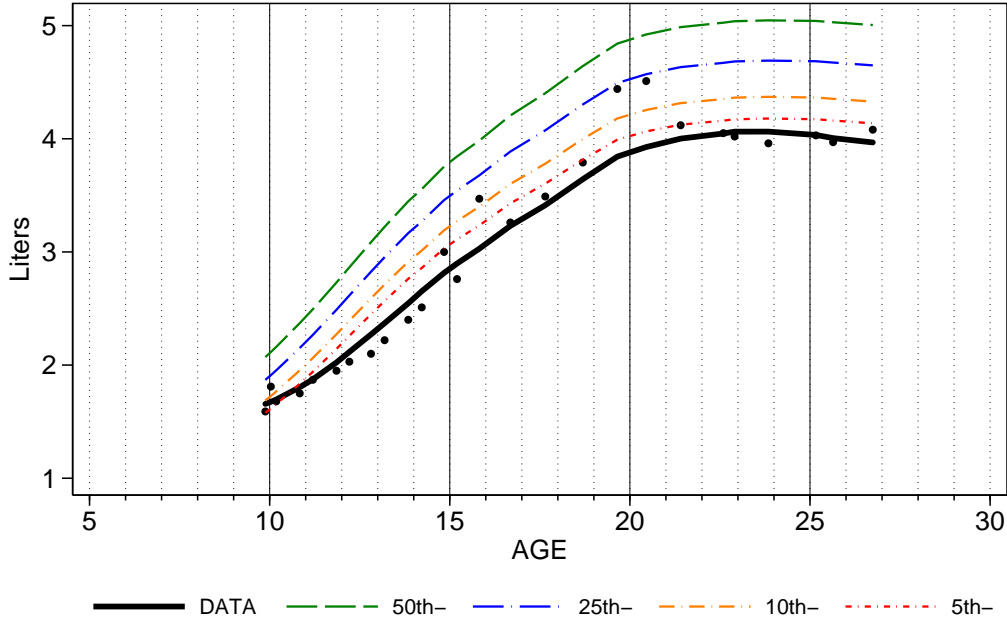

1387

**PATTERN OF GROWTH/DECLINE (Check One)**

- ( 1) Normal Growth
- ( 2) Normal Growth, Early Decline
- ( 3) Reduced Growth
- ( 4) Reduced Growth, Early Decline
- ( 9) Undetermined Pattern
- ( 8) Undetermined - not enough data

Maximum lung growth attained: ( 1) Yes ( 0) No

Plateau started: ( 2) No plateau ( 1) Yes ( 0) No

Decline started: ( 1) Yes ( 0) No

AGE AT each of the following periods (use '99' if N/A):

Maximum Lung Growth: \_\_\_\_ . \_\_\_\_

Start of Plateau: \_\_\_\_ . \_\_\_\_

Start of Decline: \_\_\_\_ . \_\_\_\_

### Pre-BD FEV1 Data and Percentiles: 1388

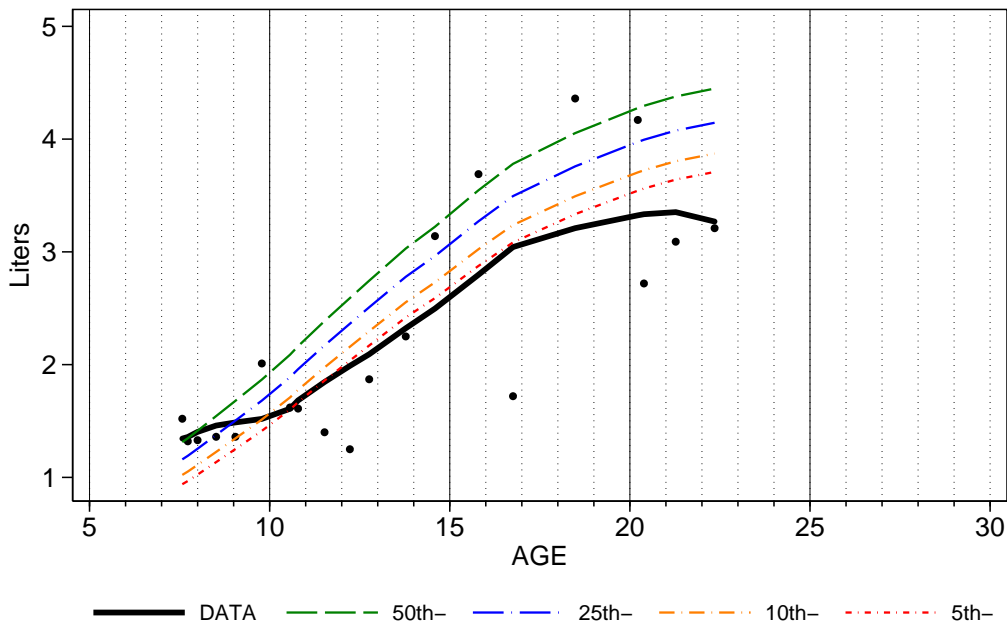

1388

**PATTERN OF GROWTH/DECLINE (Check One)**

- ( 1 ) Normal Growth
- ( 2 ) Normal Growth, Early Decline
- ( 3 ) Reduced Growth
- ( 4 ) Reduced Growth, Early Decline
- ( 9 ) Undetermined Pattern
- ( 8 ) Undetermined - not enough data

Maximum lung growth attained: ( 1 ) Yes ( 0 ) No

Plateau started: ( 2 ) No plateau ( 1 ) Yes ( 0 ) No

Decline started: ( 1 ) Yes ( 0 ) No

AGE AT each of the following periods (use '99' if N/A):

Maximum Lung Growth: \_\_\_\_ . \_\_\_\_

Start of Plateau: \_\_\_\_ . \_\_\_\_

Start of Decline: \_\_\_\_ . \_\_\_\_

### Pre-BD FEV1 Data and Percentiles: 1394

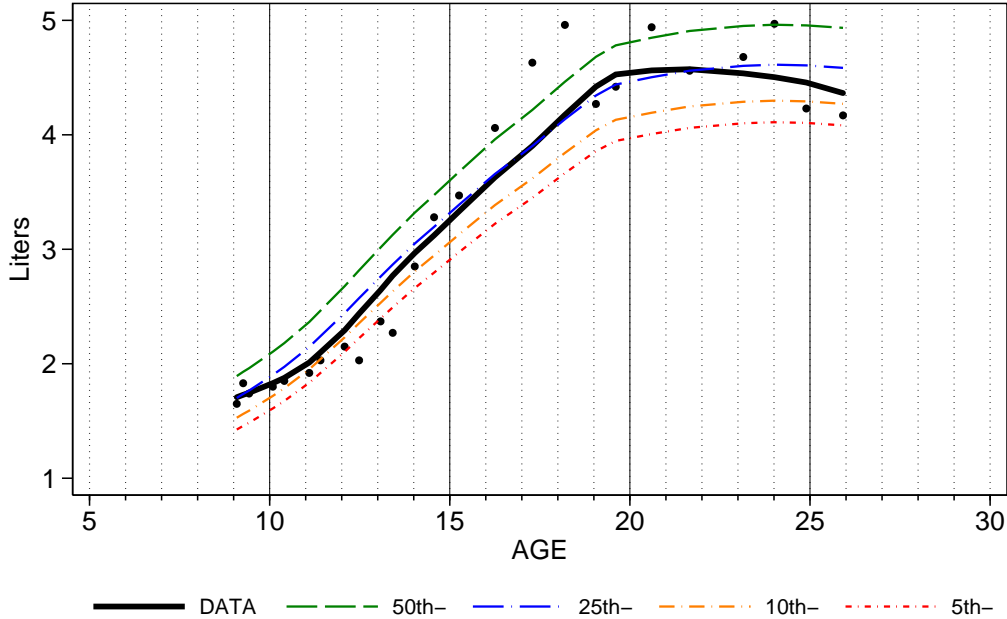

1394

**PATTERN OF GROWTH/DECLINE (Check One)**

- ( 1 ) Normal Growth
- ( 2 ) Normal Growth, Early Decline
- ( 3 ) Reduced Growth
- ( 4 ) Reduced Growth, Early Decline
- ( 9 ) Undetermined Pattern
- ( 8 ) Undetermined - not enough data

Maximum lung growth attained: ( 1 ) Yes ( 0 ) No

Plateau started: ( 2 ) No plateau ( 1 ) Yes ( 0 ) No

Decline started: ( 1 ) Yes ( 0 ) No

AGE AT each of the following periods (use '99' if N/A):

Maximum Lung Growth: \_\_\_\_ . \_\_\_\_

Start of Plateau: \_\_\_\_ . \_\_\_\_

Start of Decline: \_\_\_\_ . \_\_\_\_

### Pre-BD FEV1 Data and Percentiles: 1396

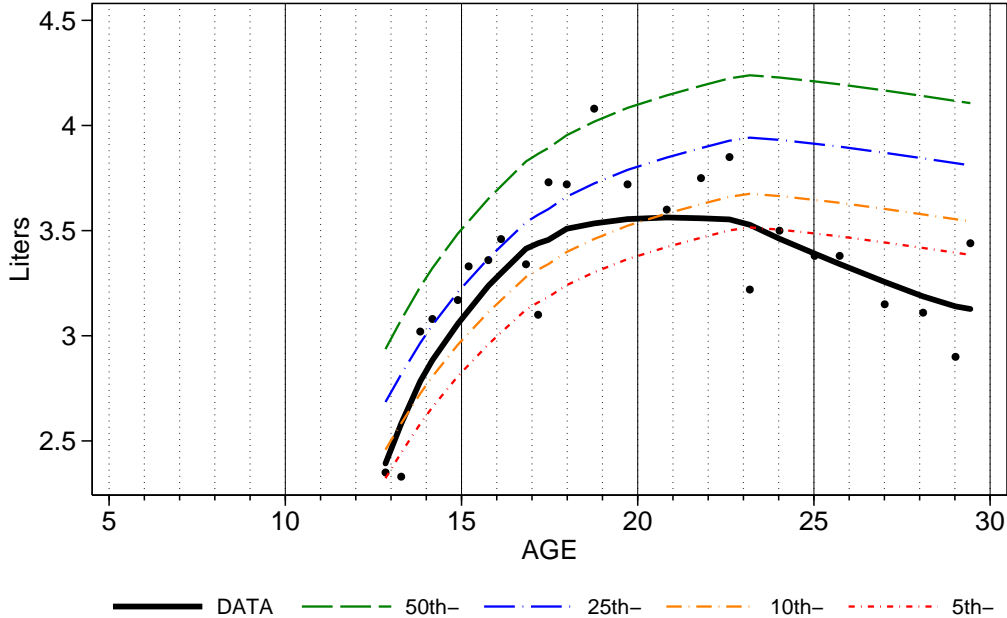

1396

**PATTERN OF GROWTH/DECLINE (Check One)**

- ( 1) Normal Growth
- ( 2) Normal Growth, Early Decline
- ( 3) Reduced Growth
- ( 4) Reduced Growth, Early Decline
- ( 9) Undetermined Pattern
- ( 8) Undetermined - not enough data

Maximum lung growth attained: ( 1) Yes ( 0) No

Plateau started: ( 2) No plateau ( 1) Yes ( 0) No

Decline started: ( 1) Yes ( 0) No

AGE AT each of the following periods (use '99' if N/A):

Maximum Lung Growth: \_\_\_\_ . \_\_\_\_

Start of Plateau: \_\_\_\_ . \_\_\_\_

Start of Decline: \_\_\_\_ . \_\_\_\_

### Pre-BD FEV1 Data and Percentiles: 1399

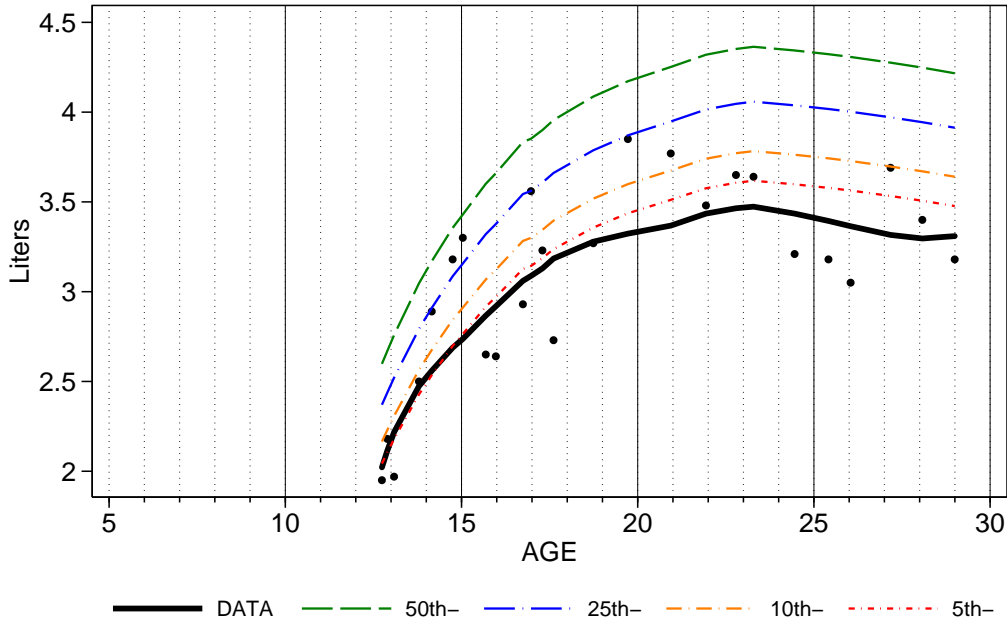

1399

**PATTERN OF GROWTH/DECLINE (Check One)**

- ( 1) Normal Growth
- ( 2) Normal Growth, Early Decline
- ( 3) Reduced Growth
- ( 4) Reduced Growth, Early Decline
- ( 9) Undetermined Pattern
- ( 8) Undetermined - not enough data

Maximum lung growth attained: ( 1) Yes ( 0) No

Plateau started: ( 2) No plateau ( 1) Yes ( 0) No

Decline started: ( 1) Yes ( 0) No

AGE AT each of the following periods (use '99' if N/A):

Maximum Lung Growth: \_\_\_\_ . \_\_\_\_

Start of Plateau: \_\_\_\_ . \_\_\_\_

Start of Decline: \_\_\_\_ . \_\_\_\_

### Pre-BD FEV1 Data and Percentiles: 1403

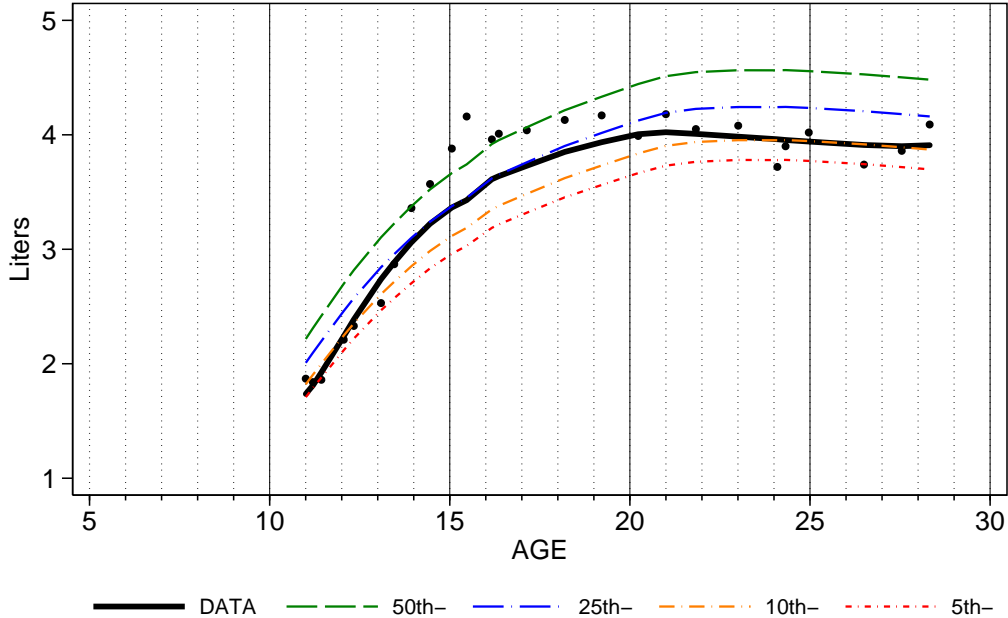

1403

**PATTERN OF GROWTH/DECLINE (Check One)**

- ( 1 ) Normal Growth
- ( 2 ) Normal Growth, Early Decline
- ( 3 ) Reduced Growth
- ( 4 ) Reduced Growth, Early Decline
- ( 9 ) Undetermined Pattern
- ( 8 ) Undetermined - not enough data

Maximum lung growth attained: ( 1 ) Yes ( 0 ) No

Plateau started: ( 2 ) No plateau ( 1 ) Yes ( 0 ) No

Decline started: ( 1 ) Yes ( 0 ) No

AGE AT each of the following periods (use '99' if N/A):

Maximum Lung Growth: \_\_\_\_ . \_\_\_\_

Start of Plateau: \_\_\_\_ . \_\_\_\_

Start of Decline: \_\_\_\_ . \_\_\_\_

### Pre-BD FEV1 Data and Percentiles: 1409

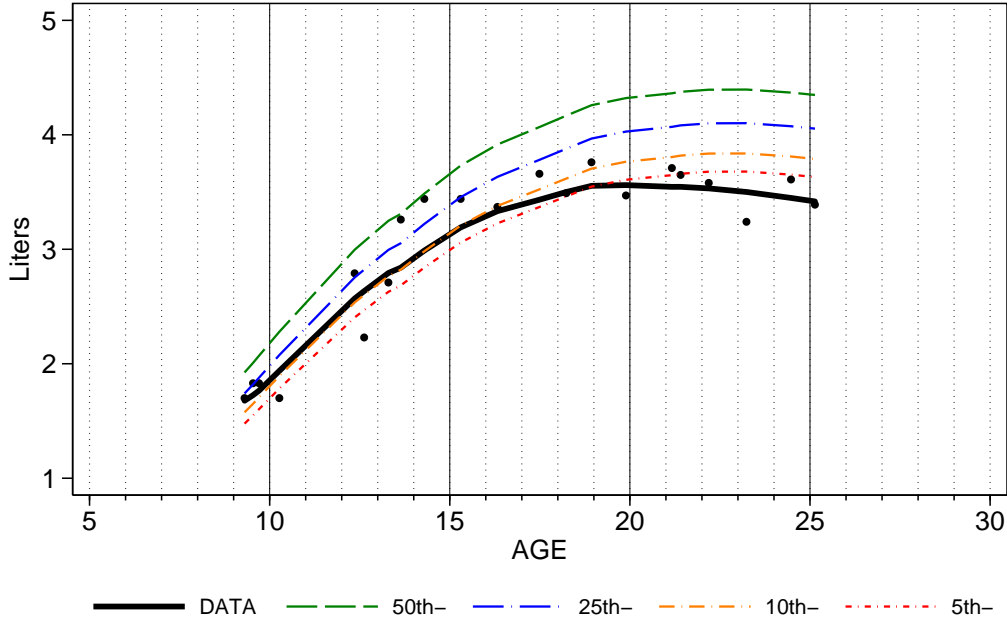

1409

**PATTERN OF GROWTH/DECLINE (Check One)**

- ( 1 ) Normal Growth
- ( 2 ) Normal Growth, Early Decline
- ( 3 ) Reduced Growth
- ( 4 ) Reduced Growth, Early Decline
- ( 9 ) Undetermined Pattern
- ( 8 ) Undetermined - not enough data

Maximum lung growth attained: ( 1 ) Yes ( 0 ) No

Plateau started: ( 2 ) No plateau ( 1 ) Yes ( 0 ) No

Decline started: ( 1 ) Yes ( 0 ) No

AGE AT each of the following periods (use '99' if N/A):

Maximum Lung Growth: \_\_\_\_ . \_\_\_\_

Start of Plateau: \_\_\_\_ . \_\_\_\_

Start of Decline: \_\_\_\_ . \_\_\_\_



### Pre-BD FEV1 Data and Percentiles: 1417

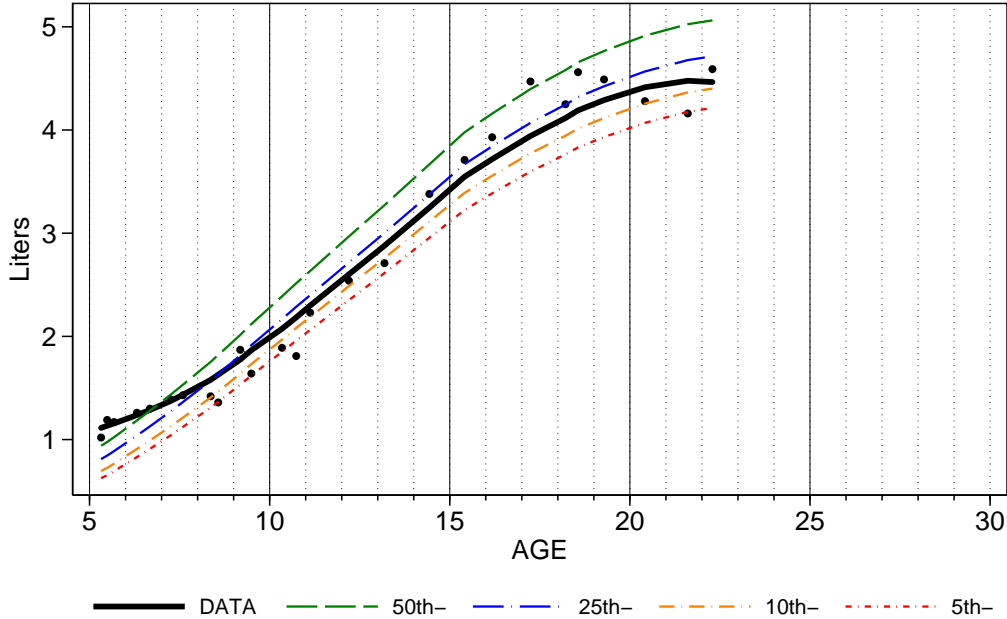

1417

**PATTERN OF GROWTH/DECLINE (Check One)**

- ( 1 ) Normal Growth
- ( 2 ) Normal Growth, Early Decline
- ( 3 ) Reduced Growth
- ( 4 ) Reduced Growth, Early Decline
- ( 9 ) Undetermined Pattern
- ( 8 ) Undetermined - not enough data

Maximum lung growth attained: ( 1 ) Yes ( 0 ) No

Plateau started: ( 2 ) No plateau ( 1 ) Yes ( 0 ) No

Decline started: ( 1 ) Yes ( 0 ) No

AGE AT each of the following periods (use '99' if N/A):

Maximum Lung Growth: \_\_\_\_ . \_\_\_\_

Start of Plateau: \_\_\_\_ . \_\_\_\_

Start of Decline: \_\_\_\_ . \_\_\_\_

### Pre-BD FEV1 Data and Percentiles: 1425

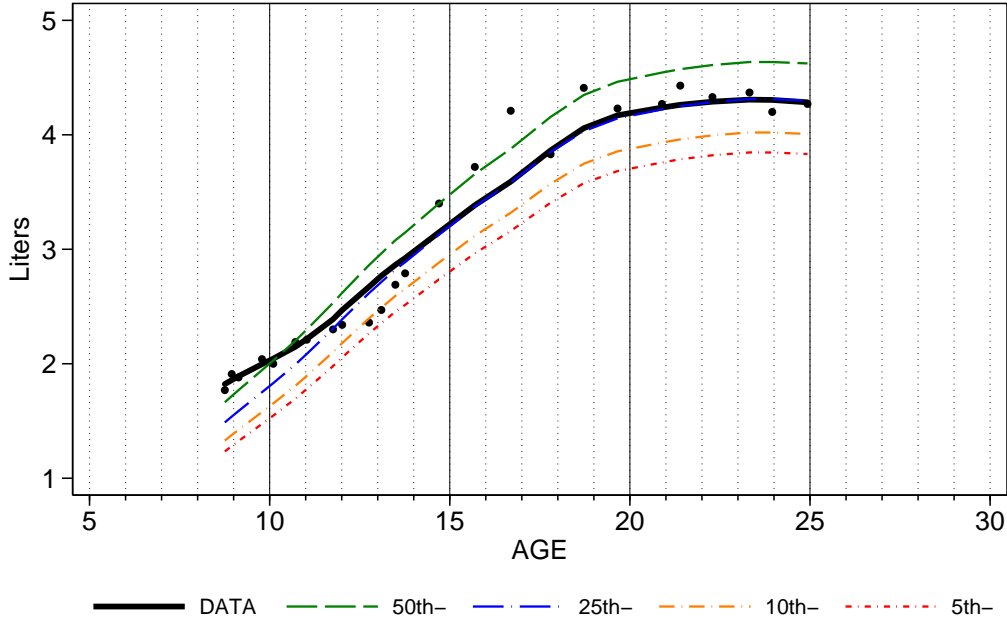

1425

**PATTERN OF GROWTH/DECLINE (Check One)**

- ( 1 ) Normal Growth
- ( 2 ) Normal Growth, Early Decline
- ( 3 ) Reduced Growth
- ( 4 ) Reduced Growth, Early Decline
- ( 9 ) Undetermined Pattern
- ( 8 ) Undetermined - not enough data

Maximum lung growth attained: ( 1 ) Yes ( 0 ) No

Plateau started: ( 2 ) No plateau ( 1 ) Yes ( 0 ) No

Decline started: ( 1 ) Yes ( 0 ) No

AGE AT each of the following periods (use '99' if N/A):

Maximum Lung Growth: \_\_\_\_ . \_\_\_\_

Start of Plateau: \_\_\_\_ . \_\_\_\_

Start of Decline: \_\_\_\_ . \_\_\_\_

### Pre-BD FEV1 Data and Percentiles: 1430

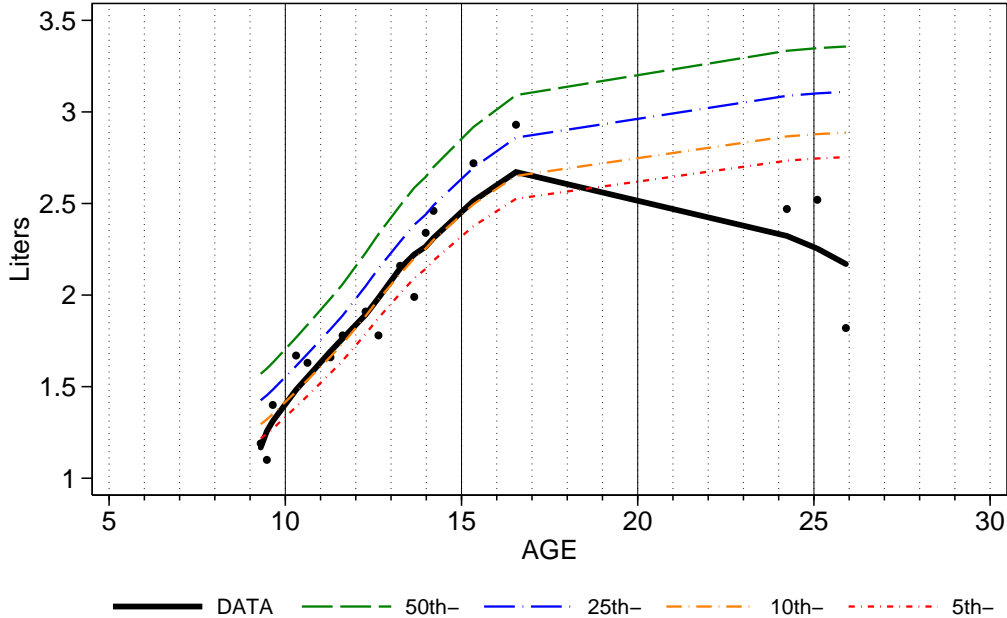

1430

**PATTERN OF GROWTH/DECLINE (Check One)**

- ( 1) Normal Growth
- ( 2) Normal Growth, Early Decline
- ( 3) Reduced Growth
- ( 4) Reduced Growth, Early Decline
- ( 9) Undetermined Pattern
- ( 8) Undetermined - not enough data

Maximum lung growth attained: ( 1) Yes ( 0) No

Plateau started: ( 2) No plateau ( 1) Yes ( 0) No

Decline started: ( 1) Yes ( 0) No

AGE AT each of the following periods (use '99' if N/A):

Maximum Lung Growth: \_\_\_\_ . \_\_\_\_

Start of Plateau: \_\_\_\_ . \_\_\_\_

Start of Decline: \_\_\_\_ . \_\_\_\_

### Pre-BD FEV1 Data and Percentiles: 1433

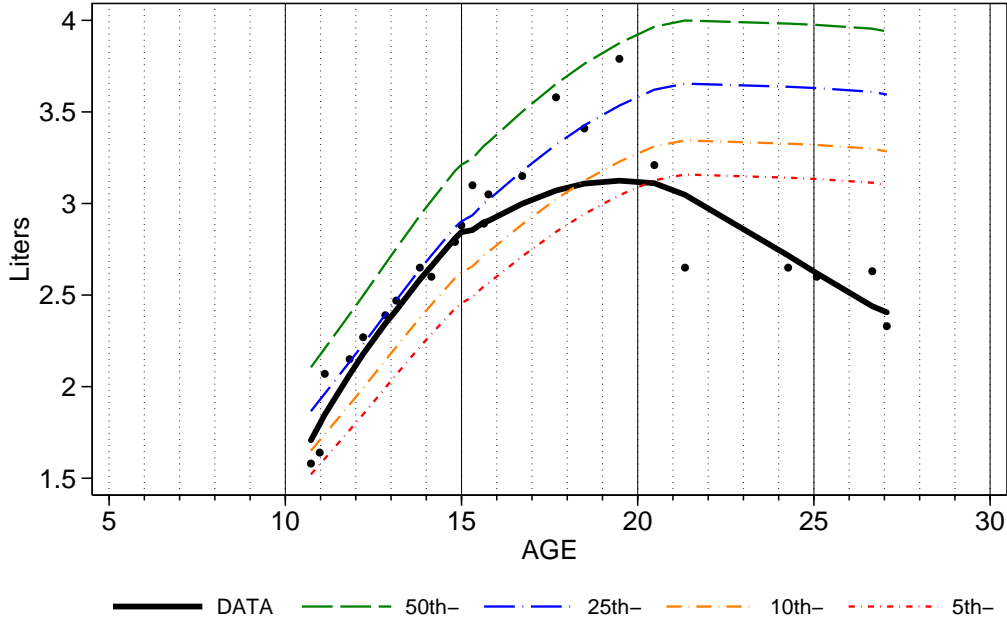

1433

**PATTERN OF GROWTH/DECLINE (Check One)**

- ( 1) Normal Growth
- ( 2) Normal Growth, Early Decline
- ( 3) Reduced Growth
- ( 4) Reduced Growth, Early Decline
- ( 9) Undetermined Pattern
- ( 8) Undetermined - not enough data

Maximum lung growth attained: ( 1) Yes ( 0) No

Plateau started: ( 2) No plateau ( 1) Yes ( 0) No

Decline started: ( 1) Yes ( 0) No

AGE AT each of the following periods (use '99' if N/A):

Maximum Lung Growth: \_\_\_\_ . \_\_\_\_

Start of Plateau: \_\_\_\_ . \_\_\_\_

Start of Decline: \_\_\_\_ . \_\_\_\_

### Pre-BD FEV1 Data and Percentiles: 1437

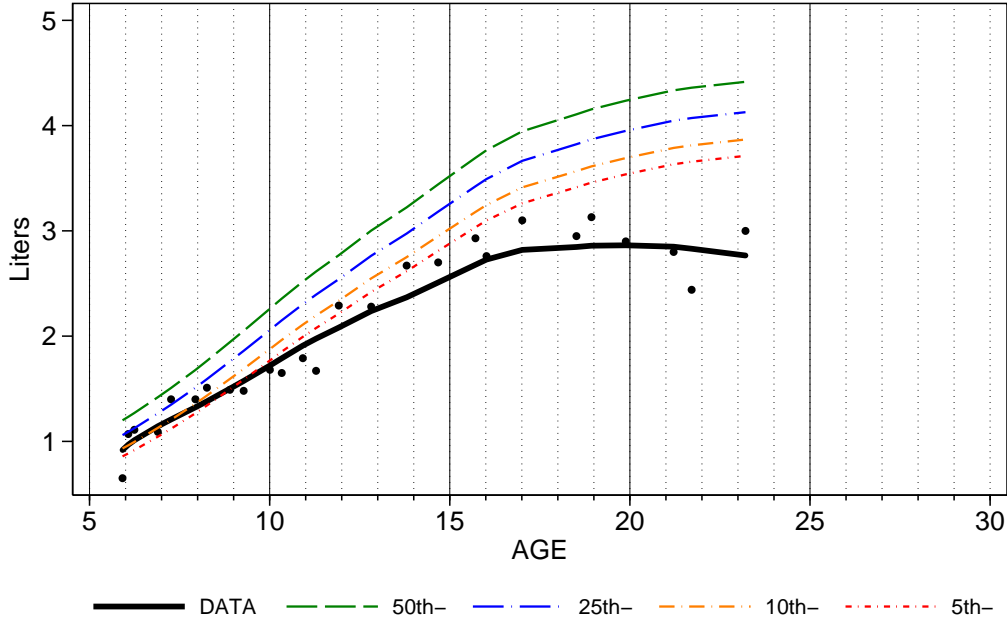

1437

**PATTERN OF GROWTH/DECLINE (Check One)**

- ( 1) Normal Growth
- ( 2) Normal Growth, Early Decline
- ( 3) Reduced Growth
- ( 4) Reduced Growth, Early Decline
- ( 9) Undetermined Pattern
- ( 8) Undetermined - not enough data

Maximum lung growth attained: ( 1) Yes ( 0) No

Plateau started: ( 2) No plateau ( 1) Yes ( 0) No

Decline started: ( 1) Yes ( 0) No

AGE AT each of the following periods (use '99' if N/A):

Maximum Lung Growth: \_\_\_\_ . \_\_\_\_

Start of Plateau: \_\_\_\_ . \_\_\_\_

Start of Decline: \_\_\_\_ . \_\_\_\_

### Pre-BD FEV1 Data and Percentiles: 1442

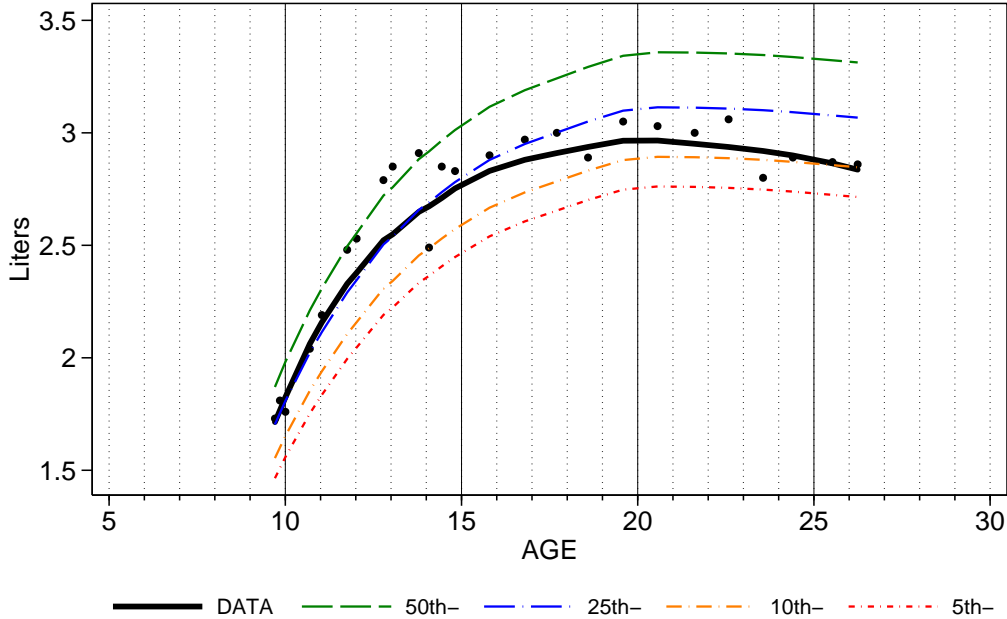

1442

**PATTERN OF GROWTH/DECLINE (Check One)**

- ( 1) Normal Growth
- ( 2) Normal Growth, Early Decline
- ( 3) Reduced Growth
- ( 4) Reduced Growth, Early Decline
- ( 9) Undetermined Pattern
- ( 8) Undetermined - not enough data

Maximum lung growth attained: ( 1) Yes ( 0) No

Plateau started: ( 2) No plateau ( 1) Yes ( 0) No

Decline started: ( 1) Yes ( 0) No

AGE AT each of the following periods (use '99' if N/A):

Maximum Lung Growth: \_\_\_\_ . \_\_\_\_

Start of Plateau: \_\_\_\_ . \_\_\_\_

Start of Decline: \_\_\_\_ . \_\_\_\_

### Pre-BD FEV1 Data and Percentiles: 1457

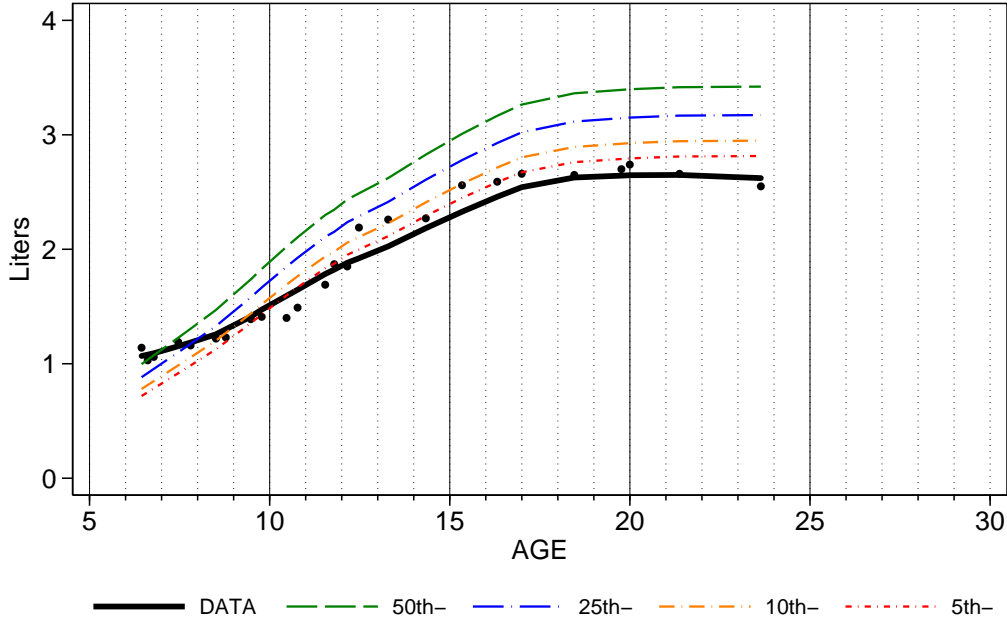

1457

**PATTERN OF GROWTH/DECLINE (Check One)**

- ( 1) Normal Growth
- ( 2) Normal Growth, Early Decline
- ( 3) Reduced Growth
- ( 4) Reduced Growth, Early Decline
- ( 9) Undetermined Pattern
- ( 8) Undetermined - not enough data

Maximum lung growth attained: ( 1) Yes ( 0) No

Plateau started: ( 2) No plateau ( 1) Yes ( 0) No

Decline started: ( 1) Yes ( 0) No

AGE AT each of the following periods (use '99' if N/A):

Maximum Lung Growth: \_\_\_\_ . \_\_\_\_

Start of Plateau: \_\_\_\_ . \_\_\_\_

Start of Decline: \_\_\_\_ . \_\_\_\_

### Pre-BD FEV1 Data and Percentiles: 1459

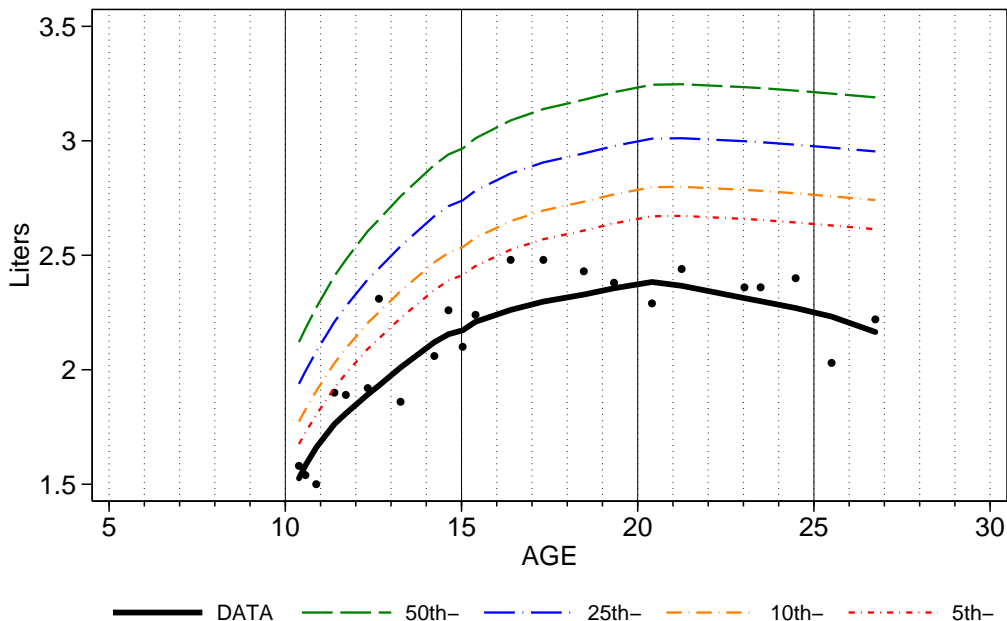

1459

**PATTERN OF GROWTH/DECLINE (Check One)**

- ( 1) Normal Growth
- ( 2) Normal Growth, Early Decline
- ( 3) Reduced Growth
- ( 4) Reduced Growth, Early Decline
- ( 9) Undetermined Pattern
- ( 8) Undetermined - not enough data

Maximum lung growth attained: ( 1) Yes ( 0) No

Plateau started: ( 2) No plateau ( 1) Yes ( 0) No

Decline started: ( 1) Yes ( 0) No

AGE AT each of the following periods (use '99' if N/A):

Maximum Lung Growth: \_\_\_\_ . \_\_\_\_

Start of Plateau: \_\_\_\_ . \_\_\_\_

Start of Decline: \_\_\_\_ . \_\_\_\_



### Pre-BD FEV1 Data and Percentiles: 1460

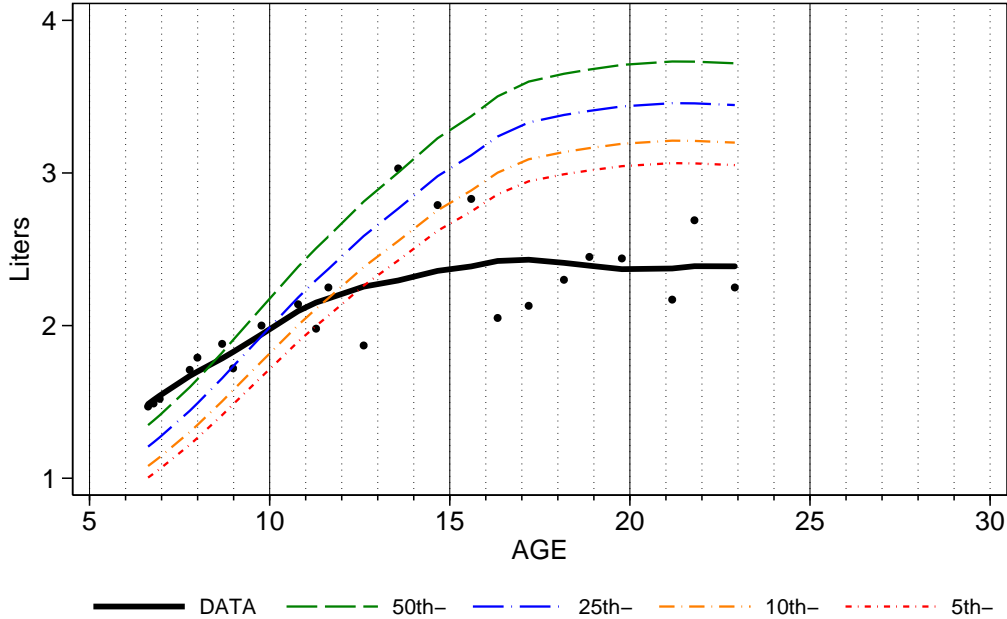

1460

**PATTERN OF GROWTH/DECLINE (Check One)**

- ( 1) Normal Growth
- ( 2) Normal Growth, Early Decline
- ( 3) Reduced Growth
- ( 4) Reduced Growth, Early Decline
- ( 9) Undetermined Pattern
- ( 8) Undetermined - not enough data

Maximum lung growth attained: ( 1) Yes ( 0) No

Plateau started: ( 2) No plateau ( 1) Yes ( 0) No

Decline started: ( 1) Yes ( 0) No

AGE AT each of the following periods (use '99' if N/A):

Maximum Lung Growth: \_\_\_\_ . \_\_\_\_

Start of Plateau: \_\_\_\_ . \_\_\_\_

Start of Decline: \_\_\_\_ . \_\_\_\_

### Pre-BD FEV1 Data and Percentiles: 1463

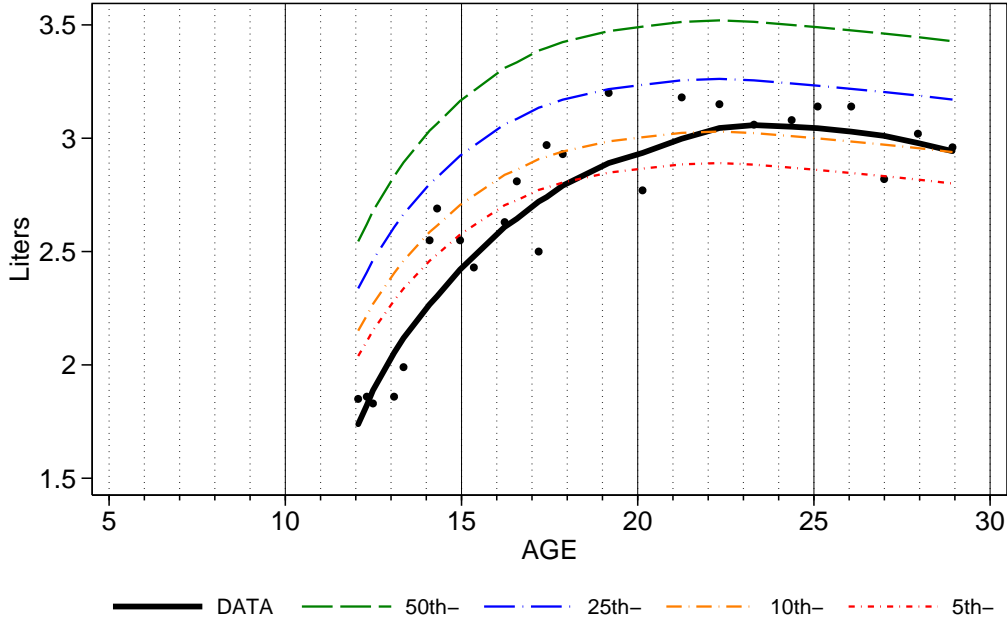

1463

**PATTERN OF GROWTH/DECLINE (Check One)**

- ( 1) Normal Growth
- ( 2) Normal Growth, Early Decline
- ( 3) Reduced Growth
- ( 4) Reduced Growth, Early Decline
- ( 9) Undetermined Pattern
- ( 8) Undetermined - not enough data

Maximum lung growth attained: ( 1) Yes ( 0) No

Plateau started: ( 2) No plateau ( 1) Yes ( 0) No

Decline started: ( 1) Yes ( 0) No

AGE AT each of the following periods (use '99' if N/A):

Maximum Lung Growth: \_\_\_\_ . \_\_\_\_

Start of Plateau: \_\_\_\_ . \_\_\_\_

Start of Decline: \_\_\_\_ . \_\_\_\_

### Pre-BD FEV1 Data and Percentiles: 1467

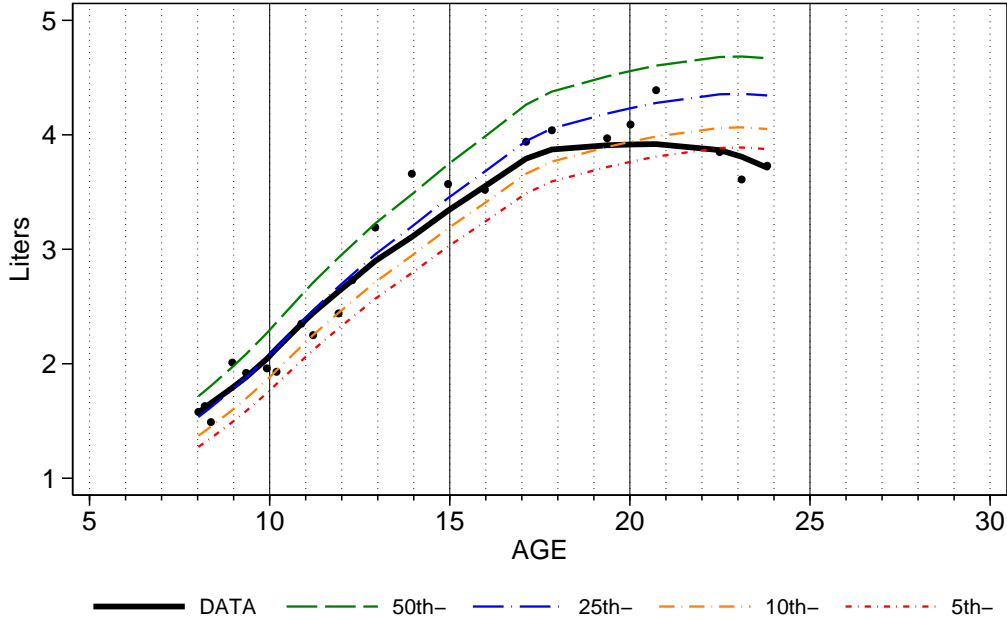

1467

**PATTERN OF GROWTH/DECLINE (Check One)**

- ( 1) Normal Growth
- ( 2) Normal Growth, Early Decline
- ( 3) Reduced Growth
- ( 4) Reduced Growth, Early Decline
- ( 9) Undetermined Pattern
- ( 8) Undetermined - not enough data

Maximum lung growth attained: ( 1) Yes ( 0) No

Plateau started: ( 2) No plateau ( 1) Yes ( 0) No

Decline started: ( 1) Yes ( 0) No

AGE AT each of the following periods (use '99' if N/A):

Maximum Lung Growth: \_\_\_\_ . \_\_\_\_

Start of Plateau: \_\_\_\_ . \_\_\_\_

Start of Decline: \_\_\_\_ . \_\_\_\_

### Pre-BD FEV1 Data and Percentiles: 1468

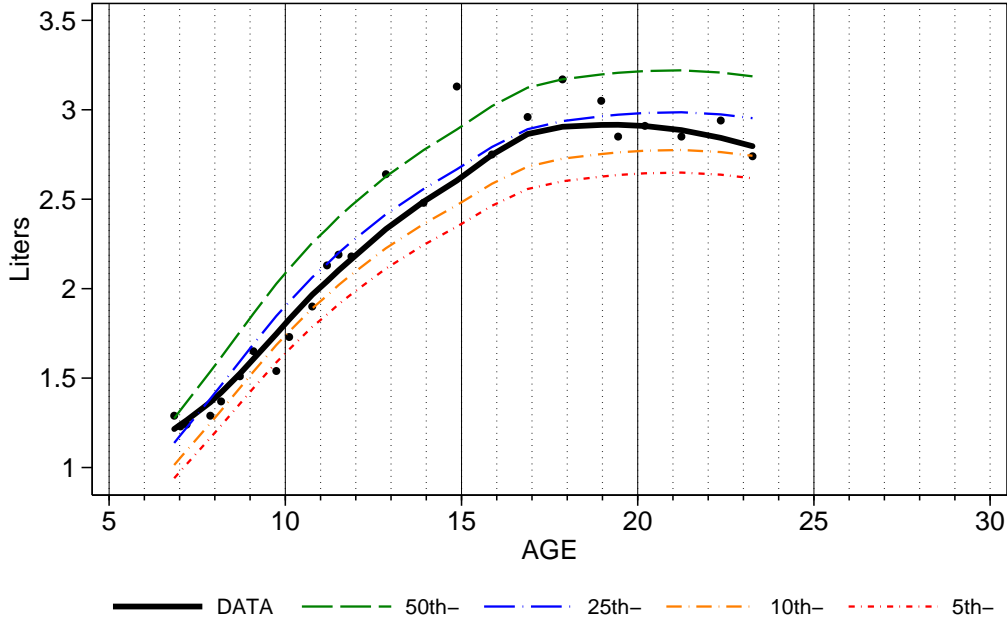

1468

**PATTERN OF GROWTH/DECLINE (Check One)**

- ( 1 ) Normal Growth
- ( 2 ) Normal Growth, Early Decline
- ( 3 ) Reduced Growth
- ( 4 ) Reduced Growth, Early Decline
- ( 9 ) Undetermined Pattern
- ( 8 ) Undetermined - not enough data

Maximum lung growth attained: ( 1 ) Yes ( 0 ) No

Plateau started: ( 2 ) No plateau ( 1 ) Yes ( 0 ) No

Decline started: ( 1 ) Yes ( 0 ) No

AGE AT each of the following periods (use '99' if N/A):

Maximum Lung Growth: \_\_\_\_ . \_\_\_\_

Start of Plateau: \_\_\_\_ . \_\_\_\_

Start of Decline: \_\_\_\_ . \_\_\_\_

### Pre-BD FEV1 Data and Percentiles: 1475

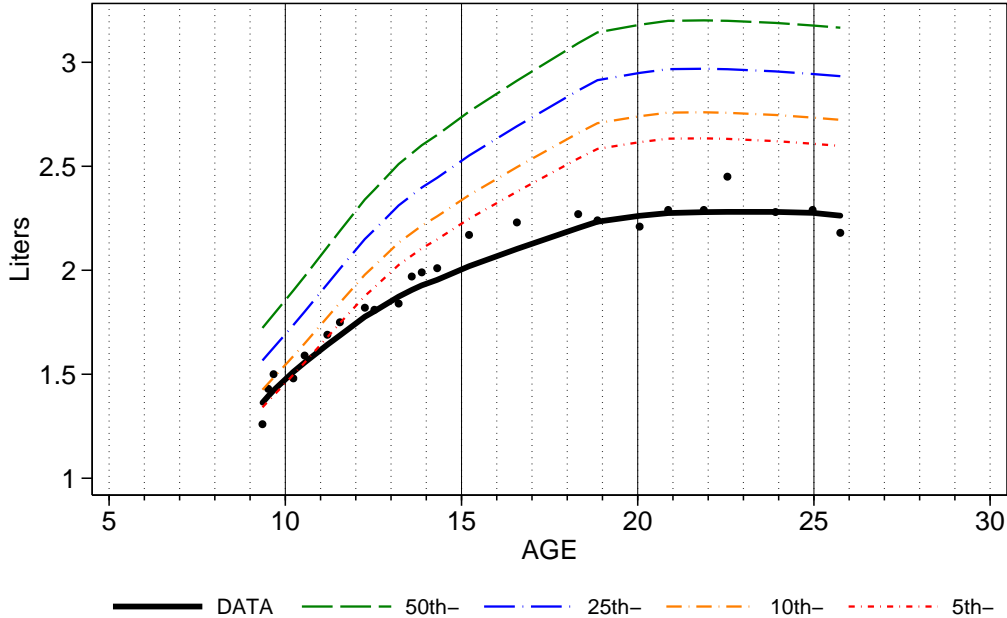

1475

**PATTERN OF GROWTH/DECLINE (Check One)**

- ( 1) Normal Growth
- ( 2) Normal Growth, Early Decline
- ( 3) Reduced Growth
- ( 4) Reduced Growth, Early Decline
- ( 9) Undetermined Pattern
- ( 8) Undetermined - not enough data

Maximum lung growth attained: ( 1) Yes ( 0) No

Plateau started: ( 2) No plateau ( 1) Yes ( 0) No

Decline started: ( 1) Yes ( 0) No

AGE AT each of the following periods (use '99' if N/A):

Maximum Lung Growth: \_\_\_\_ . \_\_\_\_

Start of Plateau: \_\_\_\_ . \_\_\_\_

Start of Decline: \_\_\_\_ . \_\_\_\_

### Pre-BD FEV1 Data and Percentiles: 1483

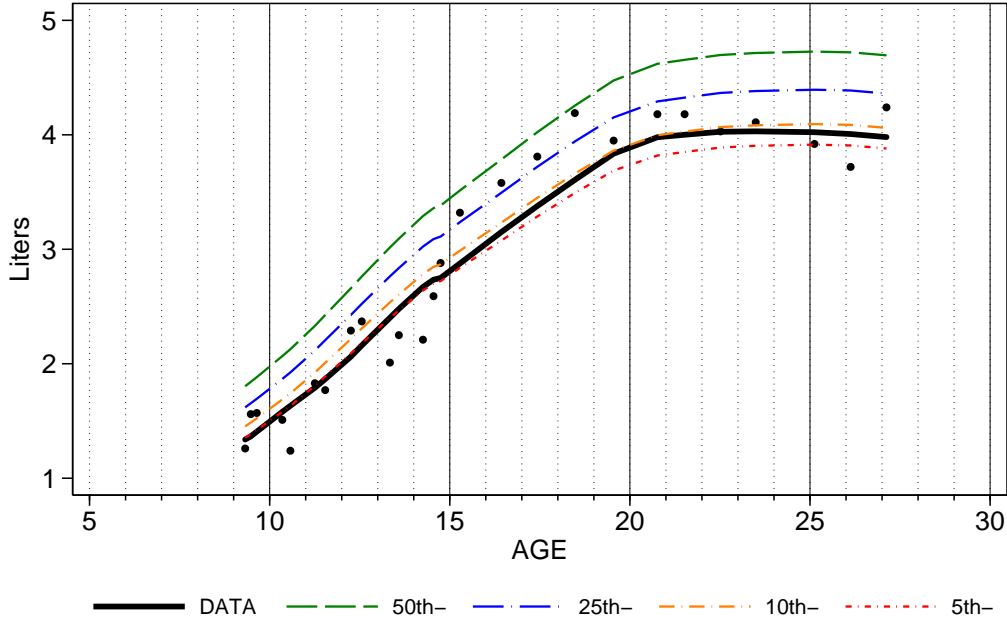

1483

**PATTERN OF GROWTH/DECLINE (Check One)**

- ( 1) Normal Growth
- ( 2) Normal Growth, Early Decline
- ( 3) Reduced Growth
- ( 4) Reduced Growth, Early Decline
- ( 9) Undetermined Pattern
- ( 8) Undetermined - not enough data

Maximum lung growth attained: ( 1) Yes ( 0) No

Plateau started: ( 2) No plateau ( 1) Yes ( 0) No

Decline started: ( 1) Yes ( 0) No

AGE AT each of the following periods (use '99' if N/A):

Maximum Lung Growth: \_\_\_\_ . \_\_\_\_

Start of Plateau: \_\_\_\_ . \_\_\_\_

Start of Decline: \_\_\_\_ . \_\_\_\_

### Pre-BD FEV1 Data and Percentiles: 1484

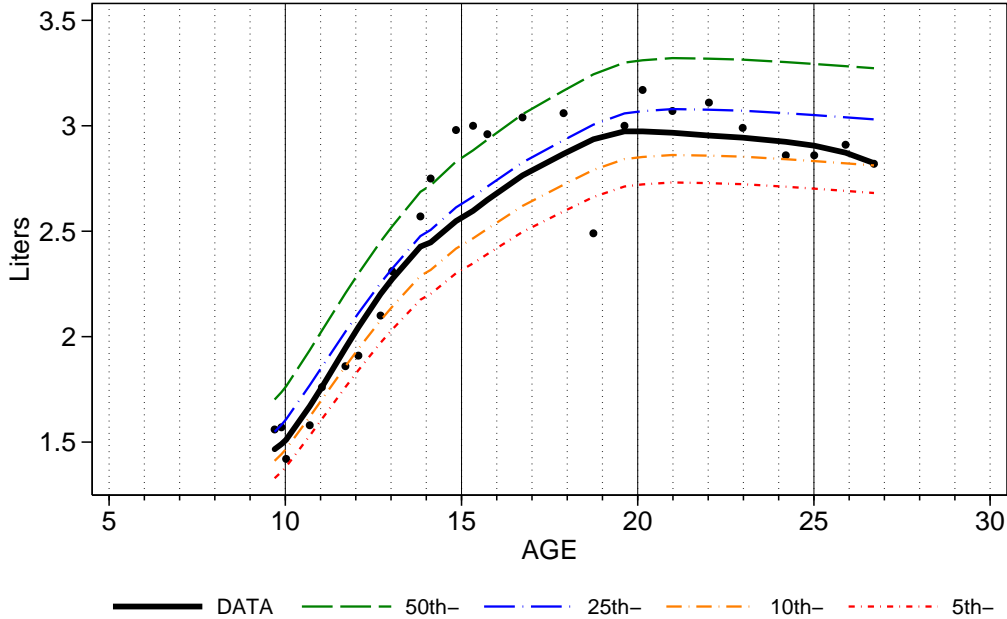

1484

**PATTERN OF GROWTH/DECLINE (Check One)**

- ( 1 ) Normal Growth
- ( 2 ) Normal Growth, Early Decline
- ( 3 ) Reduced Growth
- ( 4 ) Reduced Growth, Early Decline
- ( 9 ) Undetermined Pattern
- ( 8 ) Undetermined - not enough data

Maximum lung growth attained: ( 1 ) Yes ( 0 ) No

Plateau started: ( 2 ) No plateau ( 1 ) Yes ( 0 ) No

Decline started: ( 1 ) Yes ( 0 ) No

AGE AT each of the following periods (use '99' if N/A):

Maximum Lung Growth: \_\_\_\_ . \_\_\_\_

Start of Plateau: \_\_\_\_ . \_\_\_\_

Start of Decline: \_\_\_\_ . \_\_\_\_

### Pre-BD FEV1 Data and Percentiles: 1488

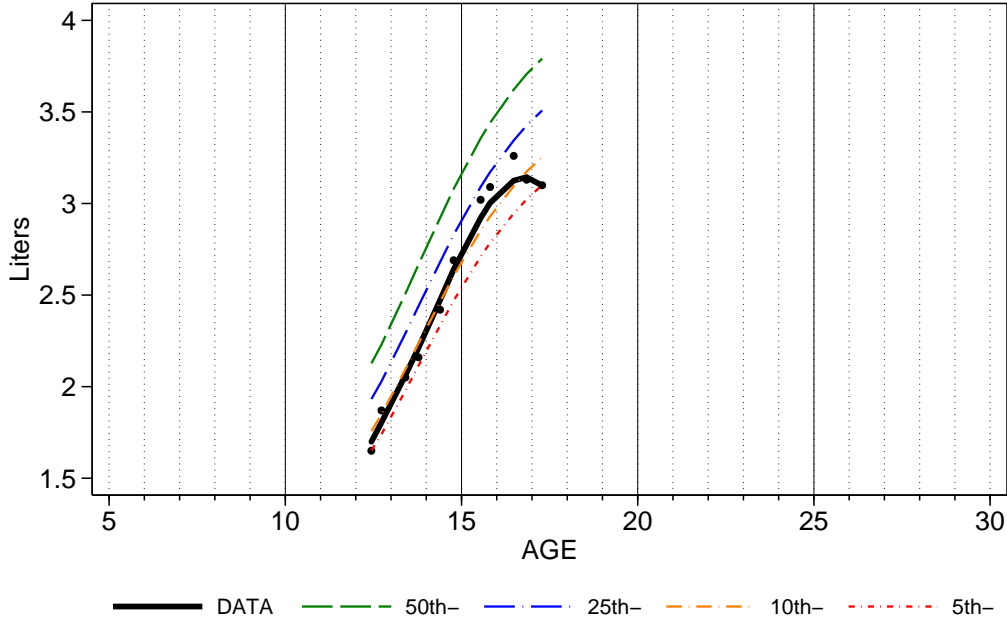

1488

**PATTERN OF GROWTH/DECLINE (Check One)**

- ( 1) Normal Growth
- ( 2) Normal Growth, Early Decline
- ( 3) Reduced Growth
- ( 4) Reduced Growth, Early Decline
- ( 9) Undetermined Pattern
- ( 8) Undetermined - not enough data

Maximum lung growth attained: ( 1) Yes ( 0) No

Plateau started: ( 2) No plateau ( 1) Yes ( 0) No

Decline started: ( 1) Yes ( 0) No

AGE AT each of the following periods (use '99' if N/A):

Maximum Lung Growth: \_\_\_\_ . \_\_\_\_

Start of Plateau: \_\_\_\_ . \_\_\_\_

Start of Decline: \_\_\_\_ . \_\_\_\_



### Pre-BD FEV1 Data and Percentiles: 1491

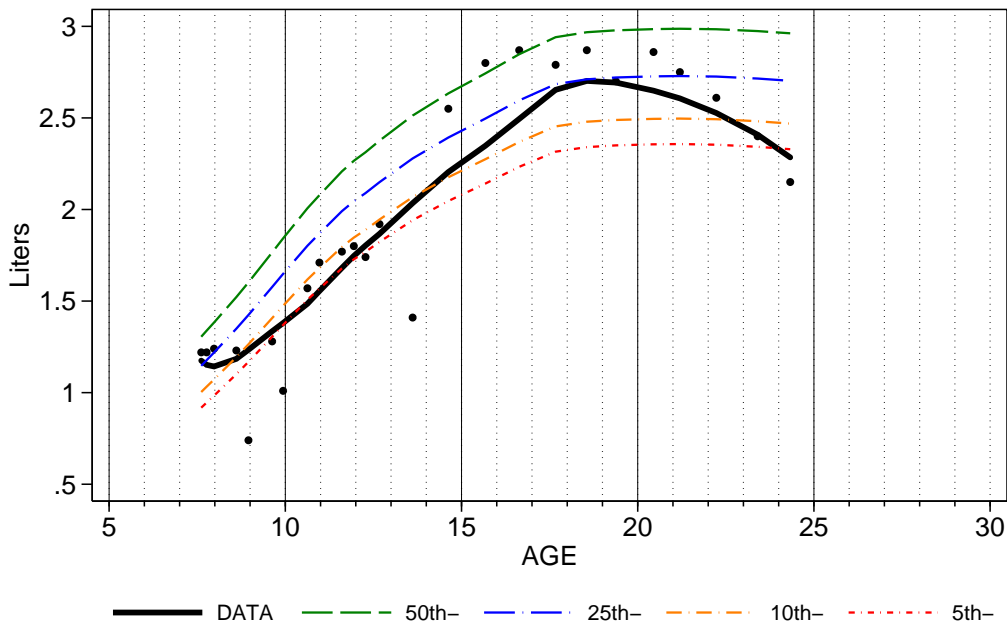

1491

**PATTERN OF GROWTH/DECLINE (Check One)**

- ( 1) Normal Growth
- ( 2) Normal Growth, Early Decline
- ( 3) Reduced Growth
- ( 4) Reduced Growth, Early Decline
- ( 9) Undetermined Pattern
- ( 8) Undetermined - not enough data

Maximum lung growth attained: ( 1) Yes ( 0) No

Plateau started: ( 2) No plateau ( 1) Yes ( 0) No

Decline started: ( 1) Yes ( 0) No

AGE AT each of the following periods (use '99' if N/A):

Maximum Lung Growth: \_\_\_\_ . \_\_\_\_

Start of Plateau: \_\_\_\_ . \_\_\_\_

Start of Decline: \_\_\_\_ . \_\_\_\_

### Pre-BD FEV1 Data and Percentiles: 1495

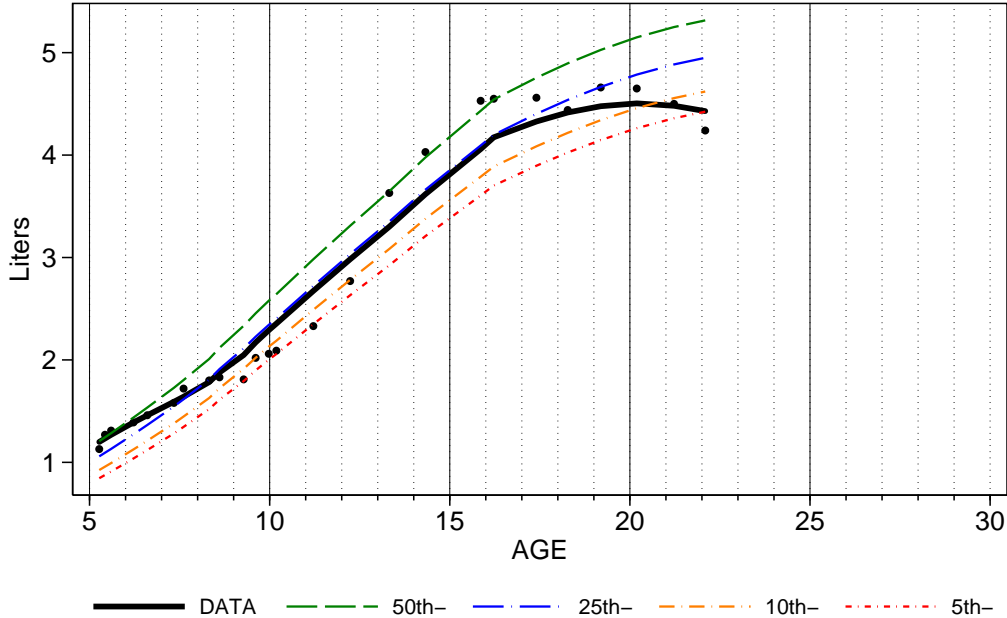

1495

**PATTERN OF GROWTH/DECLINE (Check One)**

- ( 1) Normal Growth
- ( 2) Normal Growth, Early Decline
- ( 3) Reduced Growth
- ( 4) Reduced Growth, Early Decline
- ( 9) Undetermined Pattern
- ( 8) Undetermined - not enough data

Maximum lung growth attained: ( 1) Yes ( 0) No

Plateau started: ( 2) No plateau ( 1) Yes ( 0) No

Decline started: ( 1) Yes ( 0) No

AGE AT each of the following periods (use '99' if N/A):

Maximum Lung Growth: \_\_\_\_ . \_\_\_\_

Start of Plateau: \_\_\_\_ . \_\_\_\_

Start of Decline: \_\_\_\_ . \_\_\_\_

### Pre-BD FEV1 Data and Percentiles: 1496

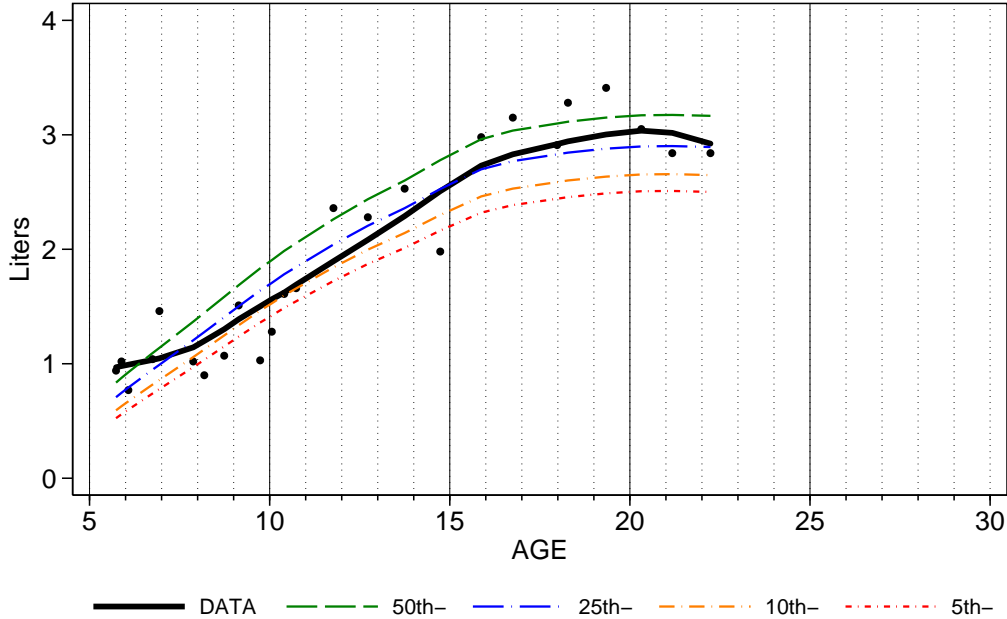

1496

**PATTERN OF GROWTH/DECLINE (Check One)**

- ( 1 ) Normal Growth
- ( 2 ) Normal Growth, Early Decline
- ( 3 ) Reduced Growth
- ( 4 ) Reduced Growth, Early Decline
- ( 9 ) Undetermined Pattern
- ( 8 ) Undetermined - not enough data

Maximum lung growth attained: ( 1 ) Yes ( 0 ) No

Plateau started: ( 2 ) No plateau ( 1 ) Yes ( 0 ) No

Decline started: ( 1 ) Yes ( 0 ) No

AGE AT each of the following periods (use '99' if N/A):

Maximum Lung Growth: \_\_\_\_ . \_\_\_\_

Start of Plateau: \_\_\_\_ . \_\_\_\_

Start of Decline: \_\_\_\_ . \_\_\_\_

### Pre-BD FEV1 Data and Percentiles: 1499

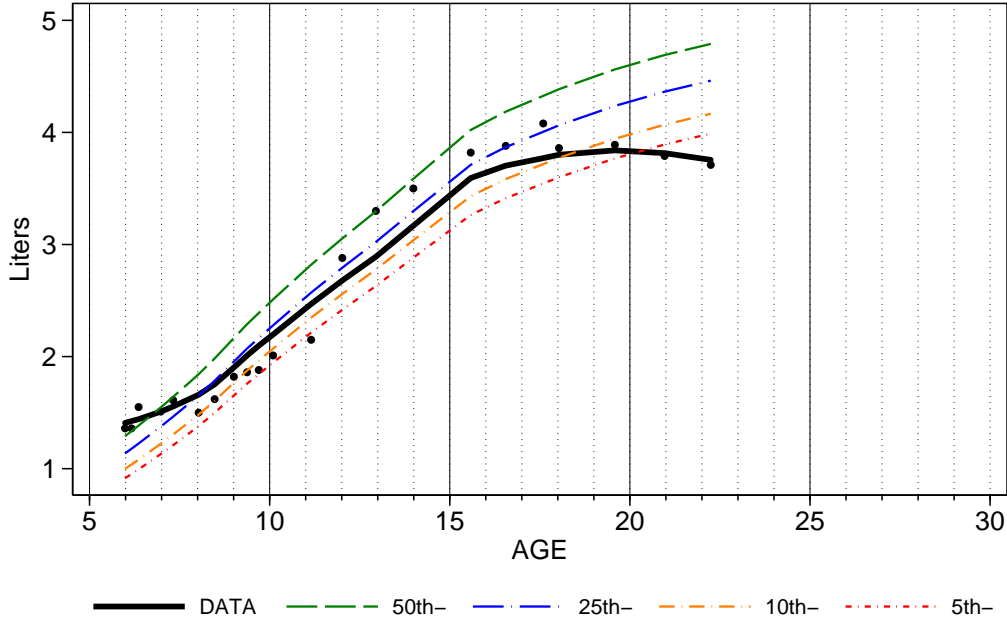

1499

**PATTERN OF GROWTH/DECLINE (Check One)**

- ( 1) Normal Growth
- ( 2) Normal Growth, Early Decline
- ( 3) Reduced Growth
- ( 4) Reduced Growth, Early Decline
- ( 9) Undetermined Pattern
- ( 8) Undetermined - not enough data

Maximum lung growth attained: ( 1) Yes ( 0) No

Plateau started: ( 2) No plateau ( 1) Yes ( 0) No

Decline started: ( 1) Yes ( 0) No

AGE AT each of the following periods (use '99' if N/A):

Maximum Lung Growth: \_\_\_\_ . \_\_\_\_

Start of Plateau: \_\_\_\_ . \_\_\_\_

Start of Decline: \_\_\_\_ . \_\_\_\_

### Pre-BD FEV1 Data and Percentiles: 1507

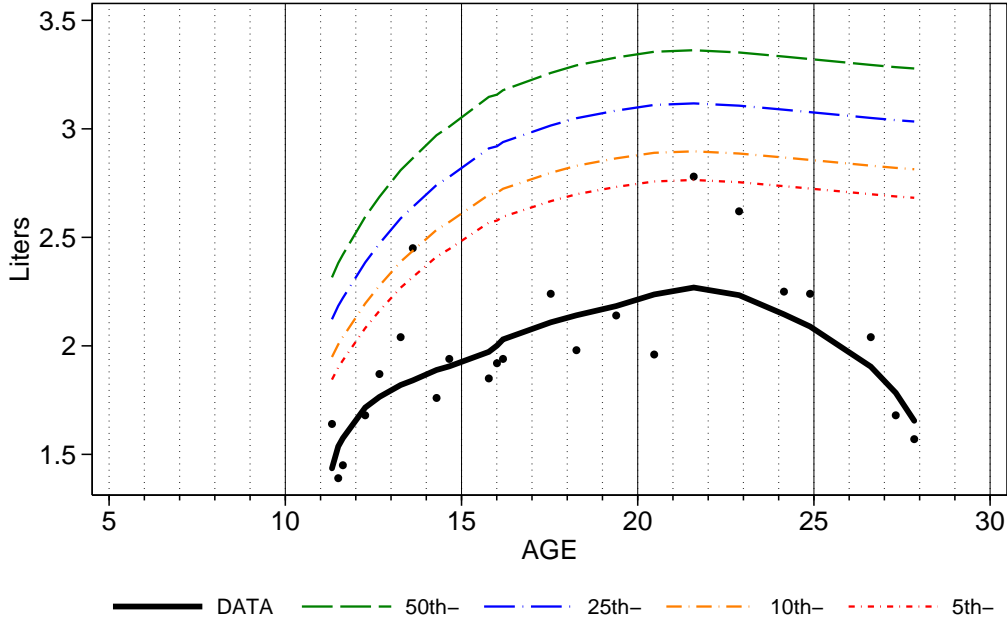

1507

**PATTERN OF GROWTH/DECLINE (Check One)**

- ( 1) Normal Growth
- ( 2) Normal Growth, Early Decline
- ( 3) Reduced Growth
- ( 4) Reduced Growth, Early Decline
- ( 9) Undetermined Pattern
- ( 8) Undetermined - not enough data

Maximum lung growth attained: ( 1) Yes ( 0) No

Plateau started: ( 2) No plateau ( 1) Yes ( 0) No

Decline started: ( 1) Yes ( 0) No

AGE AT each of the following periods (use '99' if N/A):

Maximum Lung Growth: \_\_\_\_ . \_\_\_\_

Start of Plateau: \_\_\_\_ . \_\_\_\_

Start of Decline: \_\_\_\_ . \_\_\_\_

### Pre-BD FEV1 Data and Percentiles: 1510

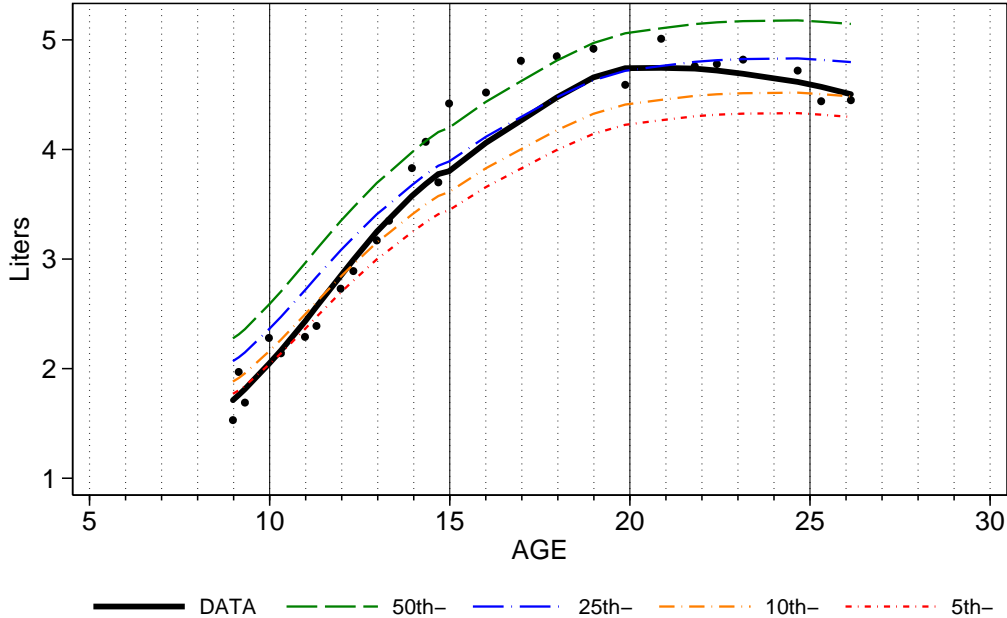

1510

**PATTERN OF GROWTH/DECLINE (Check One)**

- ( 1) Normal Growth
- ( 2) Normal Growth, Early Decline
- ( 3) Reduced Growth
- ( 4) Reduced Growth, Early Decline
- ( 9) Undetermined Pattern
- ( 8) Undetermined - not enough data

Maximum lung growth attained: ( 1) Yes ( 0) No

Plateau started: ( 2) No plateau ( 1) Yes ( 0) No

Decline started: ( 1) Yes ( 0) No

AGE AT each of the following periods (use '99' if N/A):

Maximum Lung Growth: \_\_\_\_ . \_\_\_\_

Start of Plateau: \_\_\_\_ . \_\_\_\_

Start of Decline: \_\_\_\_ . \_\_\_\_

### Pre-BD FEV1 Data and Percentiles: 1511

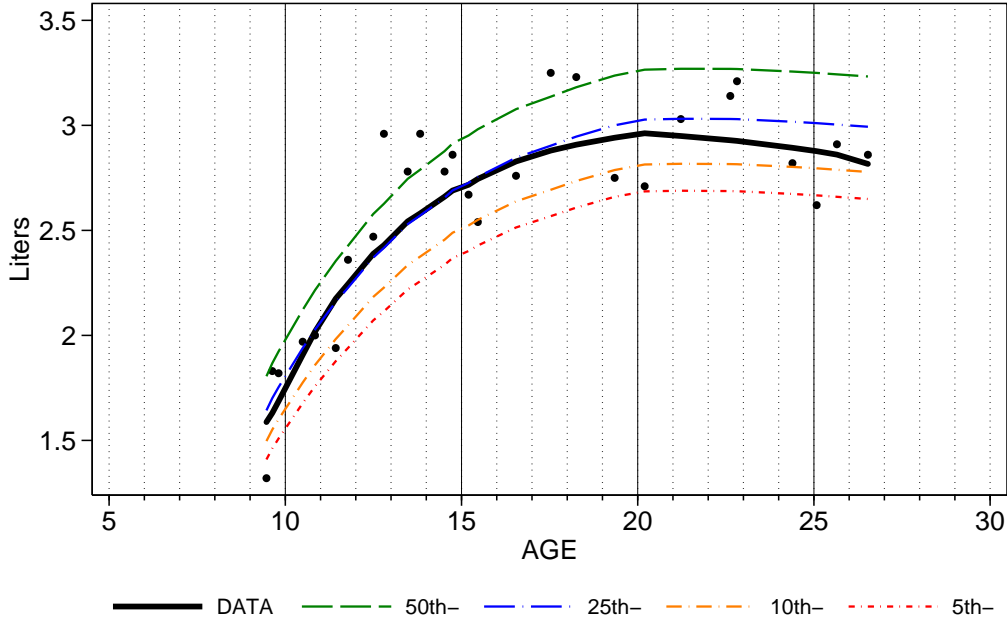

1511

**PATTERN OF GROWTH/DECLINE (Check One)**

- ( 1) Normal Growth
- ( 2) Normal Growth, Early Decline
- ( 3) Reduced Growth
- ( 4) Reduced Growth, Early Decline
- ( 9) Undetermined Pattern
- ( 8) Undetermined - not enough data

Maximum lung growth attained: ( 1) Yes ( 0) No

Plateau started: ( 2) No plateau ( 1) Yes ( 0) No

Decline started: ( 1) Yes ( 0) No

AGE AT each of the following periods (use '99' if N/A):

Maximum Lung Growth: \_\_\_\_ . \_\_\_\_

Start of Plateau: \_\_\_\_ . \_\_\_\_

Start of Decline: \_\_\_\_ . \_\_\_\_

### Pre-BD FEV1 Data and Percentiles: 1515

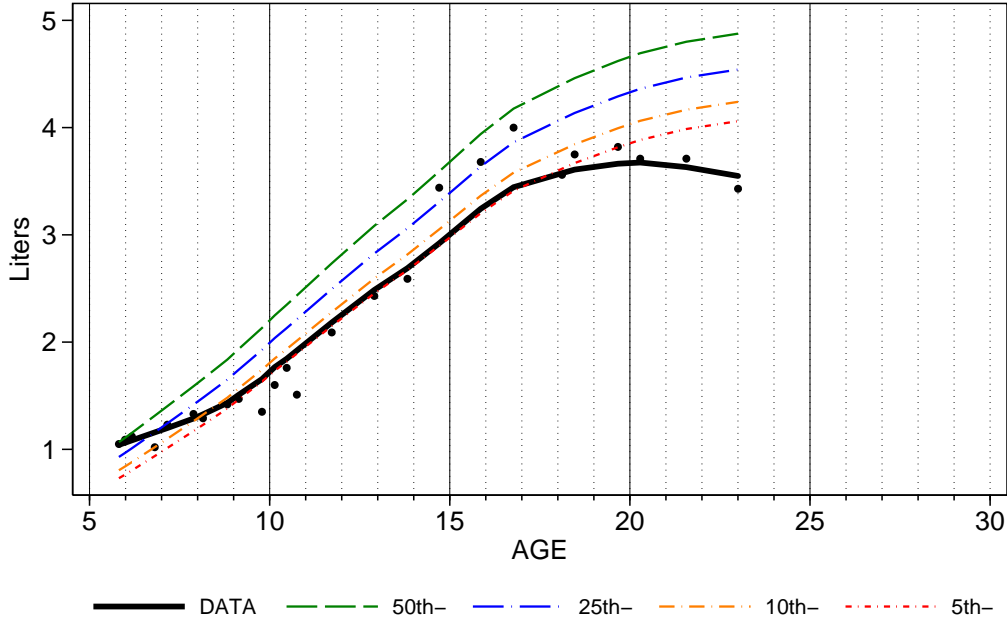

1515

**PATTERN OF GROWTH/DECLINE (Check One)**

- ( 1 ) Normal Growth
- ( 2 ) Normal Growth, Early Decline
- ( 3 ) Reduced Growth
- ( 4 ) Reduced Growth, Early Decline
- ( 9 ) Undetermined Pattern
- ( 8 ) Undetermined - not enough data

Maximum lung growth attained: ( 1 ) Yes ( 0 ) No

Plateau started: ( 2 ) No plateau ( 1 ) Yes ( 0 ) No

Decline started: ( 1 ) Yes ( 0 ) No

AGE AT each of the following periods (use '99' if N/A):

Maximum Lung Growth: \_\_\_\_ . \_\_\_\_

Start of Plateau: \_\_\_\_ . \_\_\_\_

Start of Decline: \_\_\_\_ . \_\_\_\_



### Pre-BD FEV1 Data and Percentiles: 1519

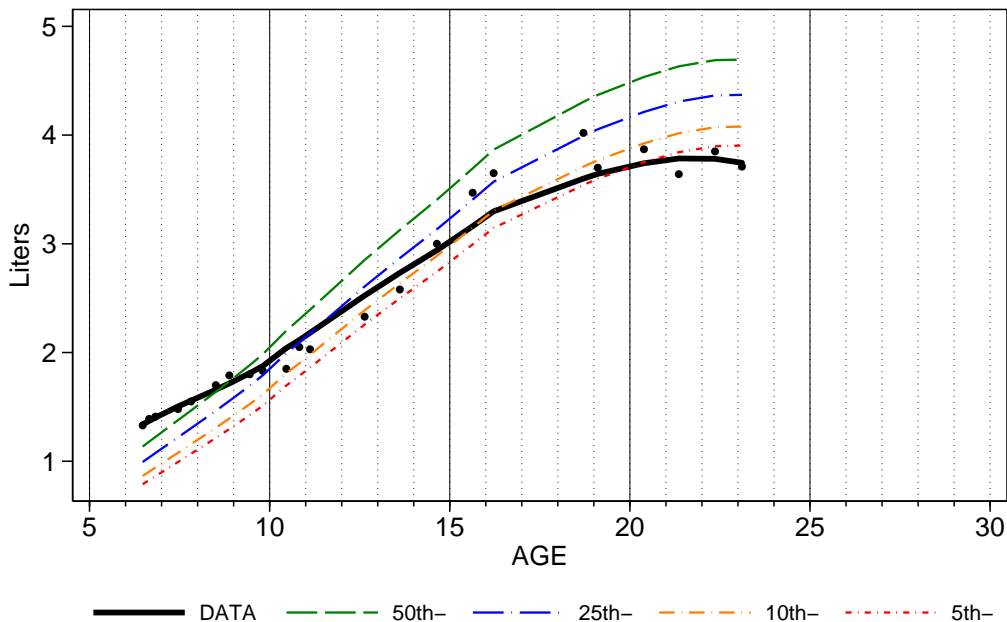

1519

**PATTERN OF GROWTH/DECLINE (Check One)**

- ( 1 ) Normal Growth
- ( 2 ) Normal Growth, Early Decline
- ( 3 ) Reduced Growth
- ( 4 ) Reduced Growth, Early Decline
- ( 9 ) Undetermined Pattern
- ( 8 ) Undetermined - not enough data

Maximum lung growth attained: ( 1 ) Yes ( 0 ) No

Plateau started: ( 2 ) No plateau ( 1 ) Yes ( 0 ) No

Decline started: ( 1 ) Yes ( 0 ) No

AGE AT each of the following periods (use '99' if N/A):

Maximum Lung Growth: \_\_\_\_ . \_\_\_\_

Start of Plateau: \_\_\_\_ . \_\_\_\_

Start of Decline: \_\_\_\_ . \_\_\_\_

### Pre-BD FEV1 Data and Percentiles: 1520

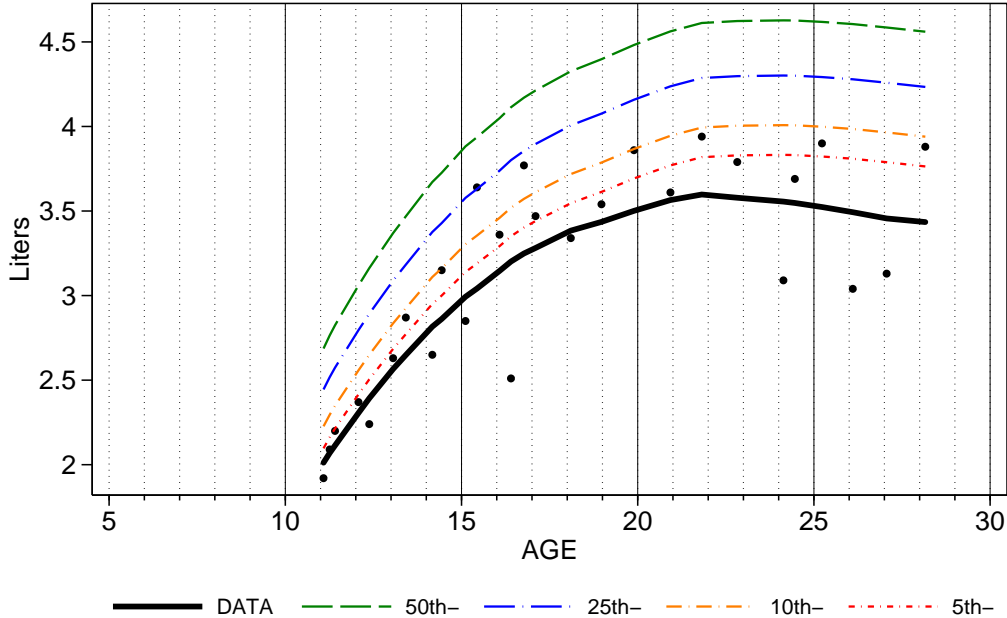

1520

**PATTERN OF GROWTH/DECLINE (Check One)**

- ( 1 ) Normal Growth
- ( 2 ) Normal Growth, Early Decline
- ( 3 ) Reduced Growth
- ( 4 ) Reduced Growth, Early Decline
- ( 9 ) Undetermined Pattern
- ( 8 ) Undetermined - not enough data

Maximum lung growth attained: ( 1 ) Yes ( 0 ) No

Plateau started: ( 2 ) No plateau ( 1 ) Yes ( 0 ) No

Decline started: ( 1 ) Yes ( 0 ) No

AGE AT each of the following periods (use '99' if N/A):

Maximum Lung Growth: \_\_\_\_ . \_\_\_\_

Start of Plateau: \_\_\_\_ . \_\_\_\_

Start of Decline: \_\_\_\_ . \_\_\_\_

### Pre-BD FEV1 Data and Percentiles: 1527

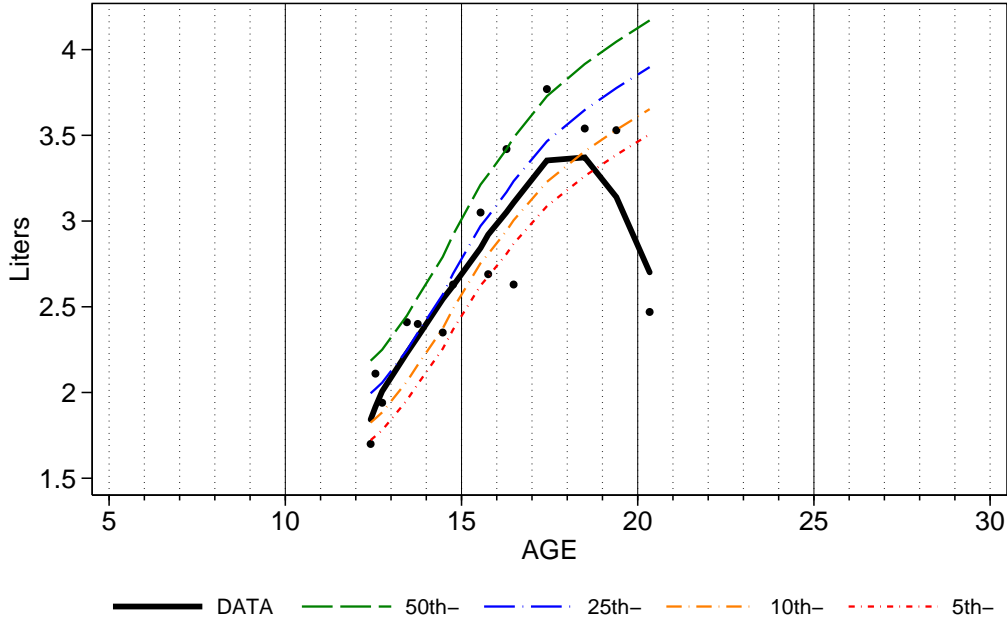

1527

**PATTERN OF GROWTH/DECLINE (Check One)**

- ( 1) Normal Growth
- ( 2) Normal Growth, Early Decline
- ( 3) Reduced Growth
- ( 4) Reduced Growth, Early Decline
- ( 9) Undetermined Pattern
- ( 8) Undetermined - not enough data

Maximum lung growth attained: ( 1) Yes ( 0) No

Plateau started: ( 2) No plateau ( 1) Yes ( 0) No

Decline started: ( 1) Yes ( 0) No

AGE AT each of the following periods (use '99' if N/A):

Maximum Lung Growth: \_\_\_\_ . \_\_\_\_

Start of Plateau: \_\_\_\_ . \_\_\_\_

Start of Decline: \_\_\_\_ . \_\_\_\_

### Pre-BD FEV1 Data and Percentiles: 1535

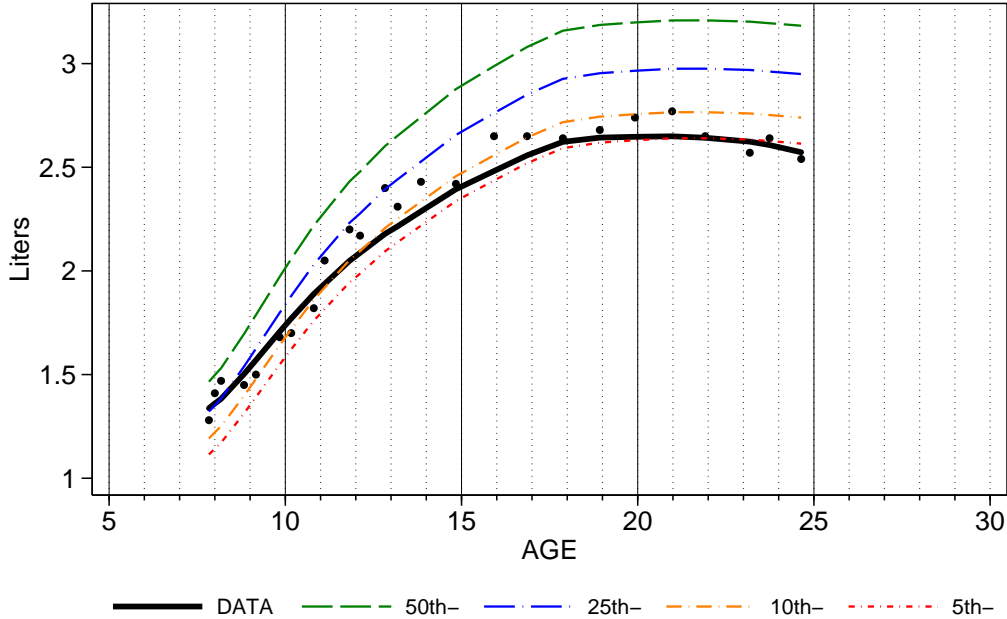

1535

**PATTERN OF GROWTH/DECLINE (Check One)**

- ( 1 ) Normal Growth
- ( 2 ) Normal Growth, Early Decline
- ( 3 ) Reduced Growth
- ( 4 ) Reduced Growth, Early Decline
- ( 9 ) Undetermined Pattern
- ( 8 ) Undetermined - not enough data

Maximum lung growth attained: ( 1 ) Yes ( 0 ) No

Plateau started: ( 2 ) No plateau ( 1 ) Yes ( 0 ) No

Decline started: ( 1 ) Yes ( 0 ) No

AGE AT each of the following periods (use '99' if N/A):

Maximum Lung Growth: \_\_\_\_ . \_\_\_\_

Start of Plateau: \_\_\_\_ . \_\_\_\_

Start of Decline: \_\_\_\_ . \_\_\_\_

### Pre-BD FEV1 Data and Percentiles: 1537

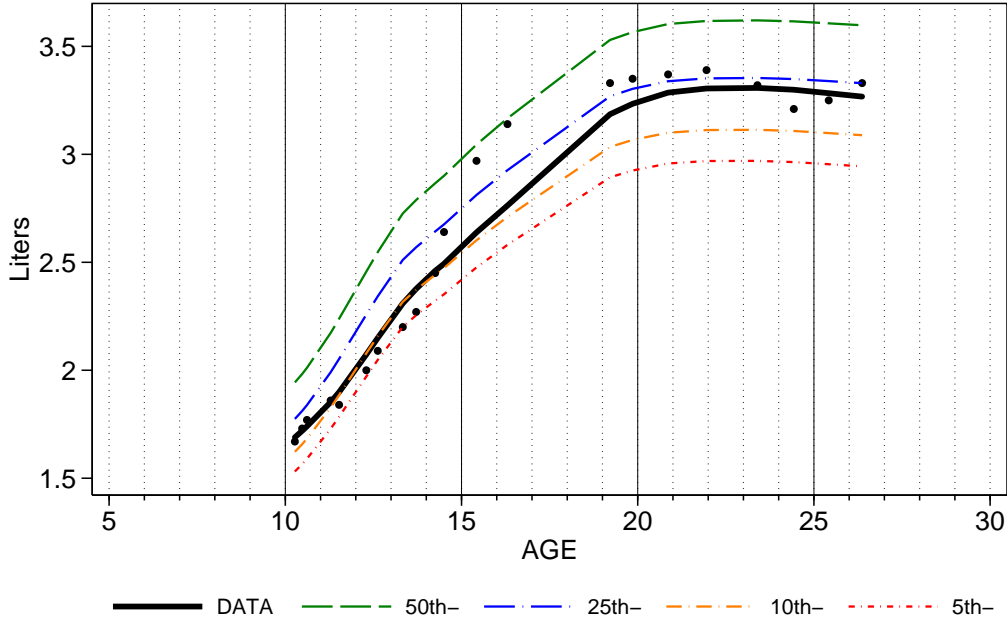

1537

**PATTERN OF GROWTH/DECLINE (Check One)**

- ( 1) Normal Growth
- ( 2) Normal Growth, Early Decline
- ( 3) Reduced Growth
- ( 4) Reduced Growth, Early Decline
- ( 9) Undetermined Pattern
- ( 8) Undetermined - not enough data

Maximum lung growth attained: ( 1) Yes ( 0) No

Plateau started: ( 2) No plateau ( 1) Yes ( 0) No

Decline started: ( 1) Yes ( 0) No

AGE AT each of the following periods (use '99' if N/A):

Maximum Lung Growth: \_\_\_\_ . \_\_\_\_

Start of Plateau: \_\_\_\_ . \_\_\_\_

Start of Decline: \_\_\_\_ . \_\_\_\_

### Pre-BD FEV1 Data and Percentiles: 1553

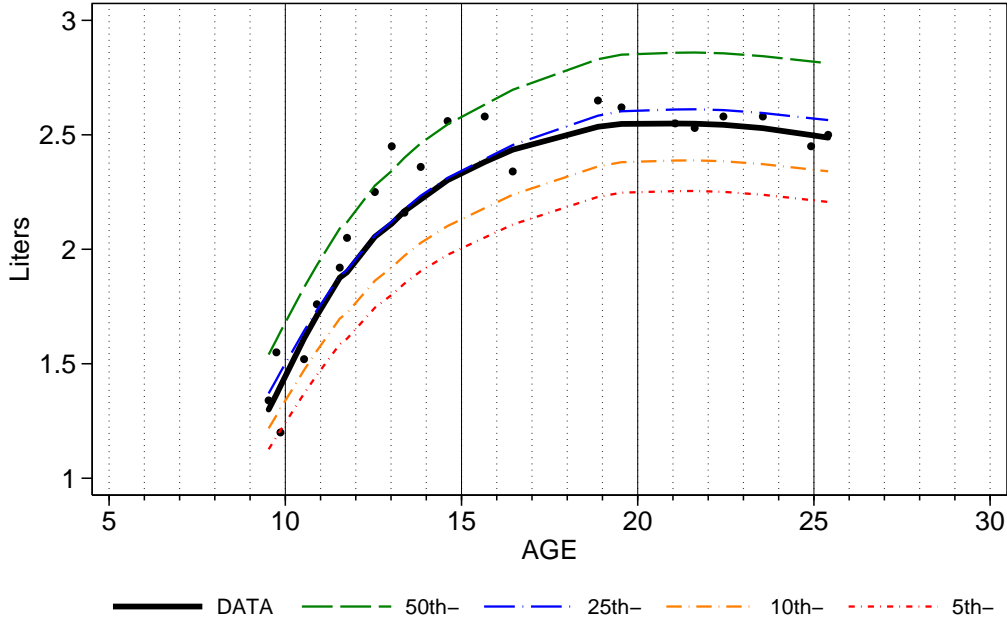

1553

**PATTERN OF GROWTH/DECLINE (Check One)**

- ( 1) Normal Growth
- ( 2) Normal Growth, Early Decline
- ( 3) Reduced Growth
- ( 4) Reduced Growth, Early Decline
- ( 9) Undetermined Pattern
- ( 8) Undetermined - not enough data

Maximum lung growth attained: ( 1) Yes ( 0) No

Plateau started: ( 2) No plateau ( 1) Yes ( 0) No

Decline started: ( 1) Yes ( 0) No

AGE AT each of the following periods (use '99' if N/A):

Maximum Lung Growth: \_\_\_\_ . \_\_\_\_

Start of Plateau: \_\_\_\_ . \_\_\_\_

Start of Decline: \_\_\_\_ . \_\_\_\_

### Pre-BD FEV1 Data and Percentiles: 1554

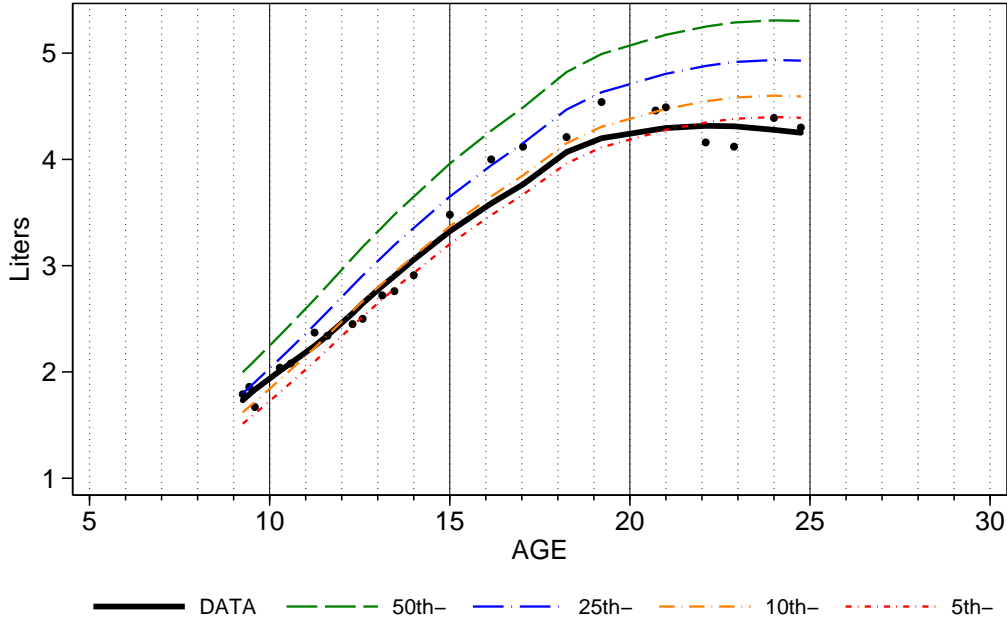

1554

**PATTERN OF GROWTH/DECLINE (Check One)**

- ( 1) Normal Growth
- ( 2) Normal Growth, Early Decline
- ( 3) Reduced Growth
- ( 4) Reduced Growth, Early Decline
- ( 9) Undetermined Pattern
- ( 8) Undetermined - not enough data

Maximum lung growth attained: ( 1) Yes ( 0) No

Plateau started: ( 2) No plateau ( 1) Yes ( 0) No

Decline started: ( 1) Yes ( 0) No

AGE AT each of the following periods (use '99' if N/A):

Maximum Lung Growth: \_\_\_\_ . \_\_\_\_

Start of Plateau: \_\_\_\_ . \_\_\_\_

Start of Decline: \_\_\_\_ . \_\_\_\_

### Pre-BD FEV1 Data and Percentiles: 1560

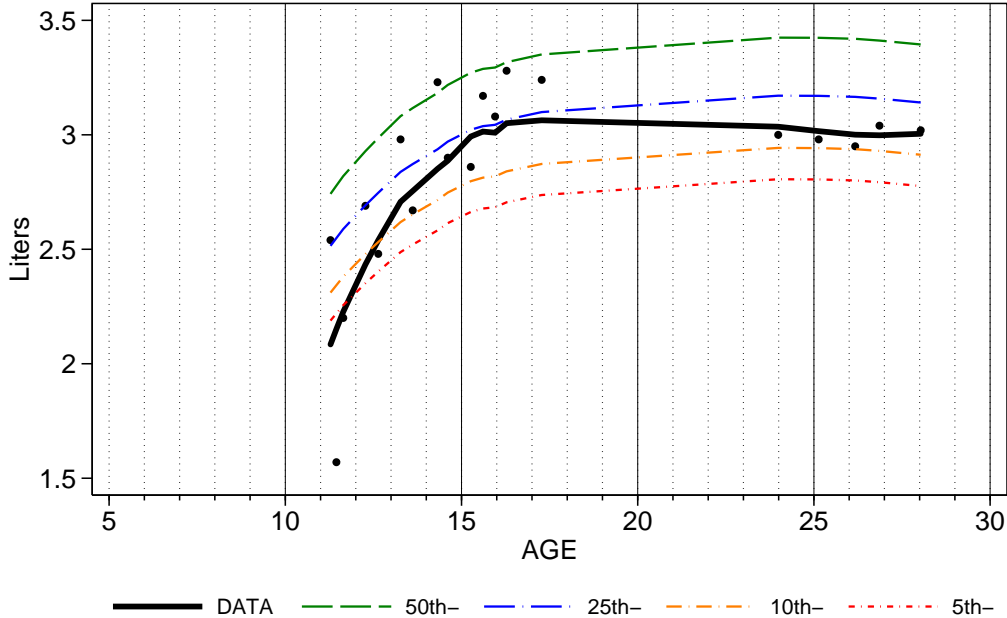

1560

**PATTERN OF GROWTH/DECLINE (Check One)**

- ( 1) Normal Growth
- ( 2) Normal Growth, Early Decline
- ( 3) Reduced Growth
- ( 4) Reduced Growth, Early Decline
- ( 9) Undetermined Pattern
- ( 8) Undetermined - not enough data

Maximum lung growth attained: ( 1) Yes ( 0) No

Plateau started: ( 2) No plateau ( 1) Yes ( 0) No

Decline started: ( 1) Yes ( 0) No

AGE AT each of the following periods (use '99' if N/A):

Maximum Lung Growth: \_\_\_\_ . \_\_\_\_

Start of Plateau: \_\_\_\_ . \_\_\_\_

Start of Decline: \_\_\_\_ . \_\_\_\_



### Pre-BD FEV1 Data and Percentiles: 1562

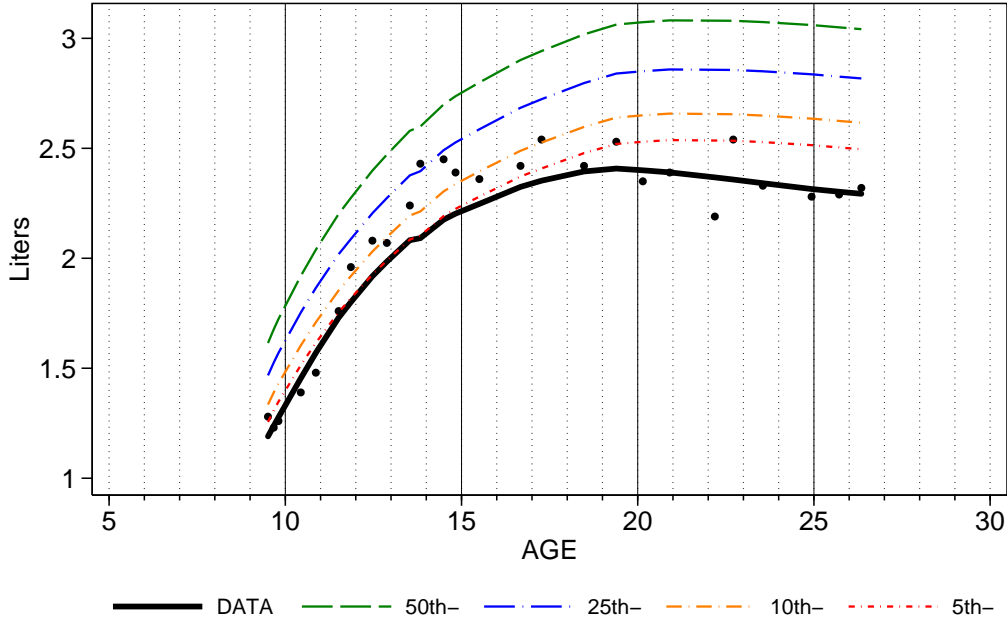

1562

**PATTERN OF GROWTH/DECLINE (Check One)**

- ( 1) Normal Growth
- ( 2) Normal Growth, Early Decline
- ( 3) Reduced Growth
- ( 4) Reduced Growth, Early Decline
- ( 9) Undetermined Pattern
- ( 8) Undetermined - not enough data

Maximum lung growth attained: ( 1) Yes ( 0) No

Plateau started: ( 2) No plateau ( 1) Yes ( 0) No

Decline started: ( 1) Yes ( 0) No

AGE AT each of the following periods (use '99' if N/A):

Maximum Lung Growth: \_\_\_\_ . \_\_\_\_

Start of Plateau: \_\_\_\_ . \_\_\_\_

Start of Decline: \_\_\_\_ . \_\_\_\_

### Pre-BD FEV1 Data and Percentiles: 1568

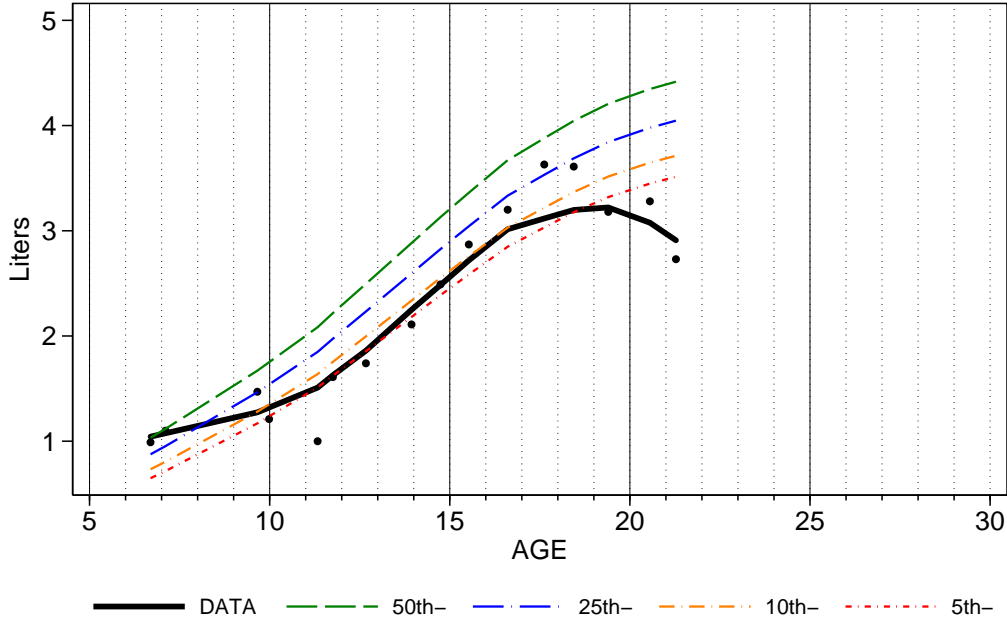

1568

**PATTERN OF GROWTH/DECLINE (Check One)**

- ( 1) Normal Growth
- ( 2) Normal Growth, Early Decline
- ( 3) Reduced Growth
- ( 4) Reduced Growth, Early Decline
- ( 9) Undetermined Pattern
- ( 8) Undetermined - not enough data

Maximum lung growth attained: ( 1) Yes ( 0) No

Plateau started: ( 2) No plateau ( 1) Yes ( 0) No

Decline started: ( 1) Yes ( 0) No

AGE AT each of the following periods (use '99' if N/A):

Maximum Lung Growth: \_\_\_\_ . \_\_\_\_

Start of Plateau: \_\_\_\_ . \_\_\_\_

Start of Decline: \_\_\_\_ . \_\_\_\_

### Pre-BD FEV1 Data and Percentiles: 1573

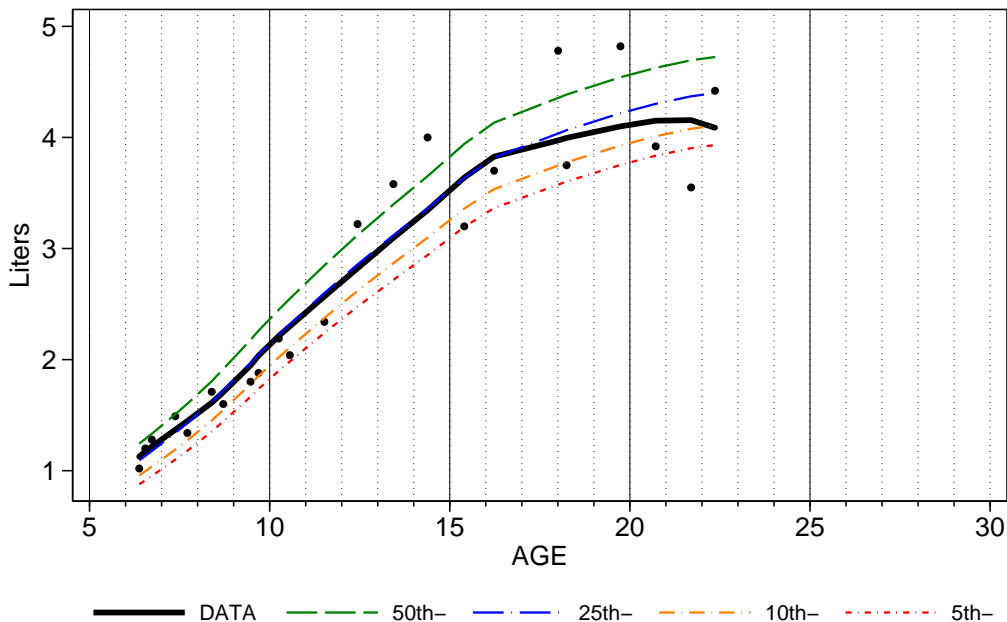

1573

**PATTERN OF GROWTH/DECLINE (Check One)**

- ( 1 ) Normal Growth
- ( 2 ) Normal Growth, Early Decline
- ( 3 ) Reduced Growth
- ( 4 ) Reduced Growth, Early Decline
- ( 9 ) Undetermined Pattern
- ( 8 ) Undetermined - not enough data

Maximum lung growth attained: ( 1 ) Yes ( 0 ) No

Plateau started: ( 2 ) No plateau ( 1 ) Yes ( 0 ) No

Decline started: ( 1 ) Yes ( 0 ) No

AGE AT each of the following periods (use '99' if N/A):

Maximum Lung Growth: \_\_\_\_ . \_\_\_\_

Start of Plateau: \_\_\_\_ . \_\_\_\_

Start of Decline: \_\_\_\_ . \_\_\_\_

### Pre-BD FEV1 Data and Percentiles: 1584

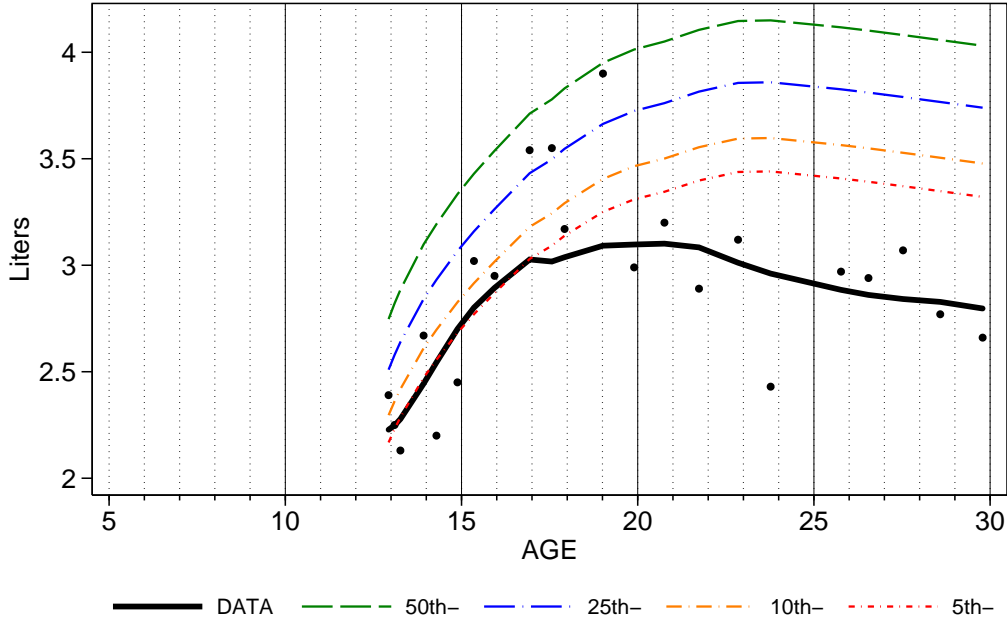

1584

**PATTERN OF GROWTH/DECLINE (Check One)**

- ( 1) Normal Growth
- ( 2) Normal Growth, Early Decline
- ( 3) Reduced Growth
- ( 4) Reduced Growth, Early Decline
- ( 9) Undetermined Pattern
- ( 8) Undetermined - not enough data

Maximum lung growth attained: ( 1) Yes ( 0) No

Plateau started: ( 2) No plateau ( 1) Yes ( 0) No

Decline started: ( 1) Yes ( 0) No

AGE AT each of the following periods (use '99' if N/A):

Maximum Lung Growth: \_\_\_\_ . \_\_\_\_

Start of Plateau: \_\_\_\_ . \_\_\_\_

Start of Decline: \_\_\_\_ . \_\_\_\_

### Pre-BD FEV1 Data and Percentiles: 1595

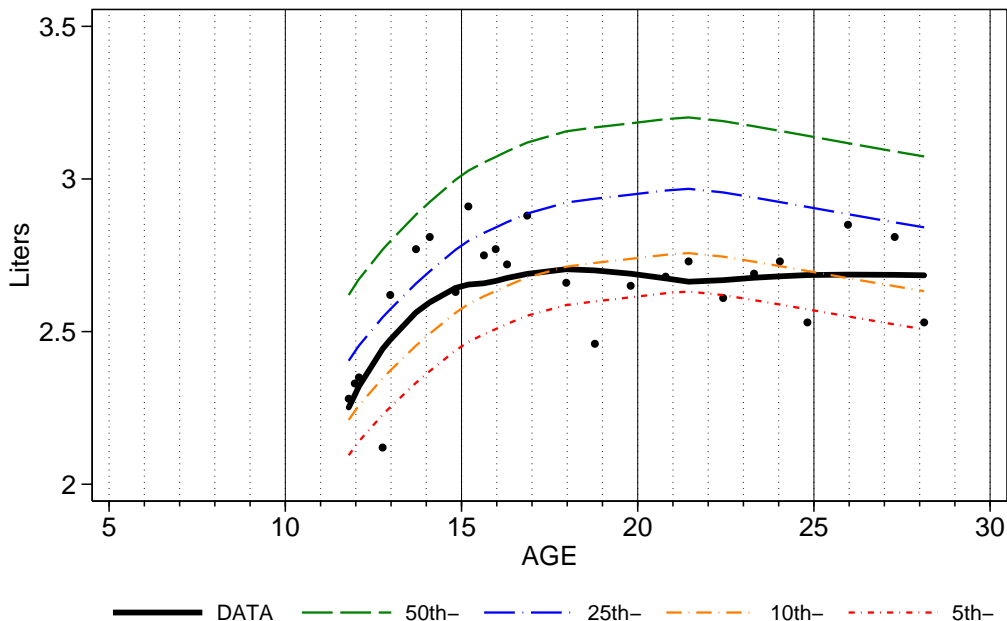

1595

**PATTERN OF GROWTH/DECLINE (Check One)**

- ( 1 ) Normal Growth
- ( 2 ) Normal Growth, Early Decline
- ( 3 ) Reduced Growth
- ( 4 ) Reduced Growth, Early Decline
- ( 9 ) Undetermined Pattern
- ( 8 ) Undetermined - not enough data

Maximum lung growth attained: ( 1 ) Yes ( 0 ) No

Plateau started: ( 2 ) No plateau ( 1 ) Yes ( 0 ) No

Decline started: ( 1 ) Yes ( 0 ) No

AGE AT each of the following periods (use '99' if N/A):

Maximum Lung Growth: \_\_\_\_ . \_\_\_\_

Start of Plateau: \_\_\_\_ . \_\_\_\_

Start of Decline: \_\_\_\_ . \_\_\_\_

### Pre-BD FEV1 Data and Percentiles: 1596

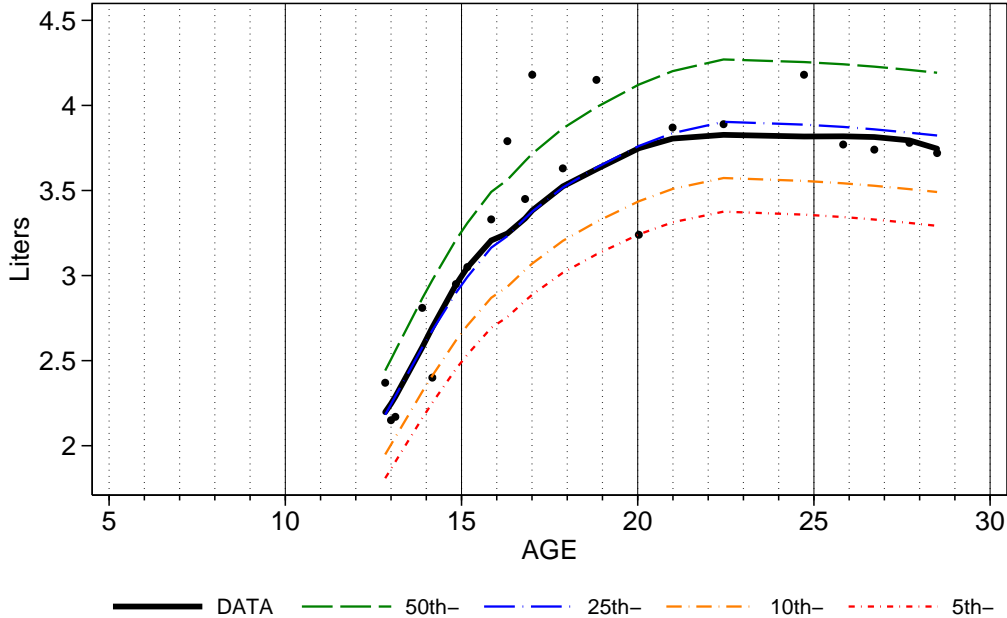

1596

**PATTERN OF GROWTH/DECLINE (Check One)**

- ( 1) Normal Growth
- ( 2) Normal Growth, Early Decline
- ( 3) Reduced Growth
- ( 4) Reduced Growth, Early Decline
- ( 9) Undetermined Pattern
- ( 8) Undetermined - not enough data

Maximum lung growth attained: ( 1) Yes ( 0) No

Plateau started: ( 2) No plateau ( 1) Yes ( 0) No

Decline started: ( 1) Yes ( 0) No

AGE AT each of the following periods (use '99' if N/A):

Maximum Lung Growth: \_\_\_\_ . \_\_\_\_

Start of Plateau: \_\_\_\_ . \_\_\_\_

Start of Decline: \_\_\_\_ . \_\_\_\_

### Pre-BD FEV1 Data and Percentiles: 1597

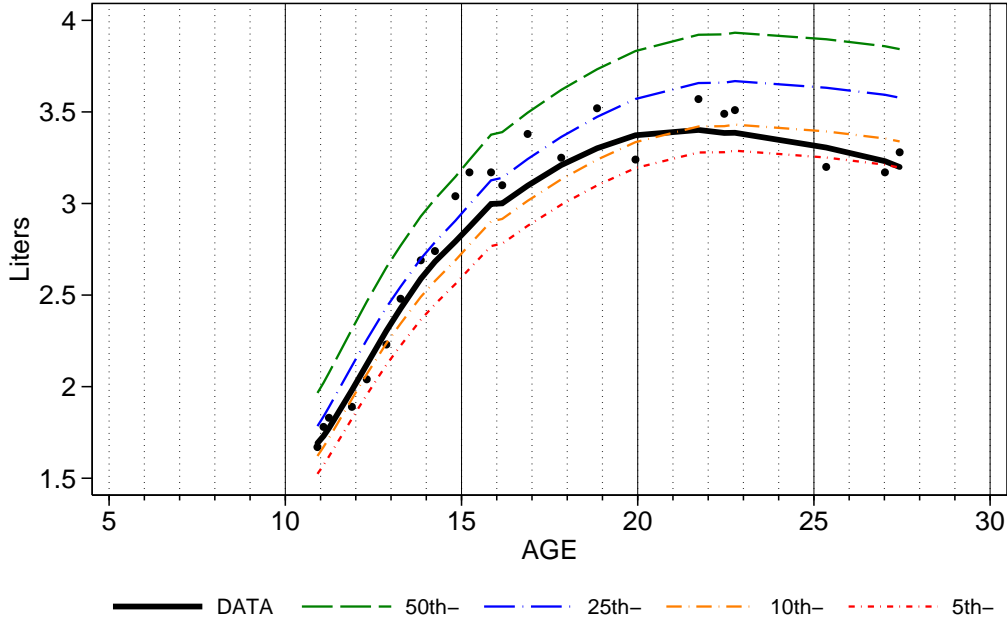

1597

**PATTERN OF GROWTH/DECLINE (Check One)**

- ( 1 ) Normal Growth
- ( 2 ) Normal Growth, Early Decline
- ( 3 ) Reduced Growth
- ( 4 ) Reduced Growth, Early Decline
- ( 9 ) Undetermined Pattern
- ( 8 ) Undetermined - not enough data

Maximum lung growth attained: ( 1 ) Yes ( 0 ) No

Plateau started: ( 2 ) No plateau ( 1 ) Yes ( 0 ) No

Decline started: ( 1 ) Yes ( 0 ) No

AGE AT each of the following periods (use '99' if N/A):

Maximum Lung Growth: \_\_\_\_ . \_\_\_\_

Start of Plateau: \_\_\_\_ . \_\_\_\_

Start of Decline: \_\_\_\_ . \_\_\_\_

### Pre-BD FEV1 Data and Percentiles: 1598

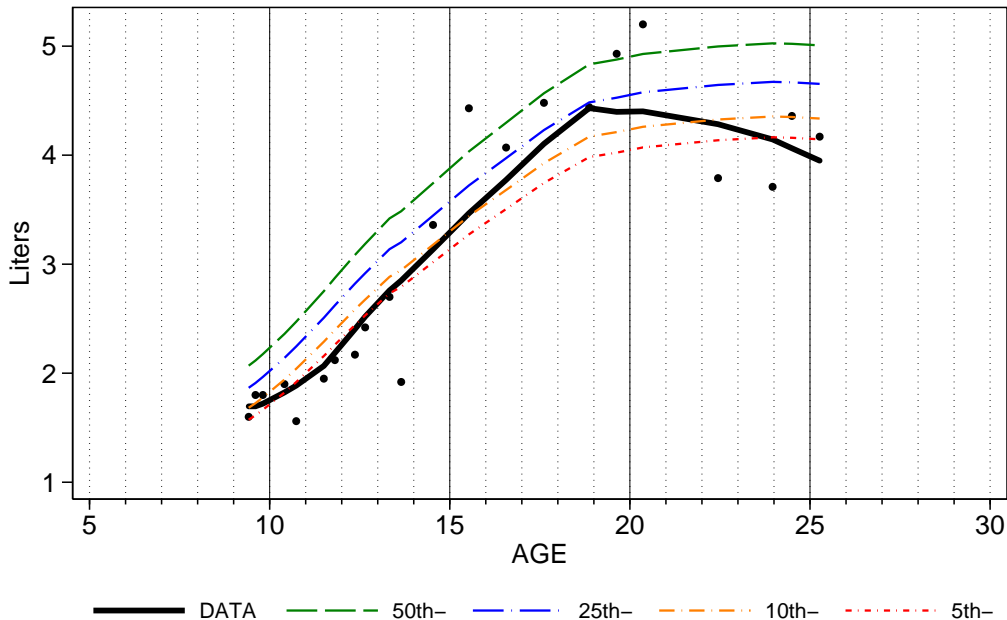

1598

**PATTERN OF GROWTH/DECLINE (Check One)**

- ( 1) Normal Growth
- ( 2) Normal Growth, Early Decline
- ( 3) Reduced Growth
- ( 4) Reduced Growth, Early Decline
- ( 9) Undetermined Pattern
- ( 8) Undetermined - not enough data

Maximum lung growth attained: ( 1) Yes ( 0) No

Plateau started: ( 2) No plateau ( 1) Yes ( 0) No

Decline started: ( 1) Yes ( 0) No

AGE AT each of the following periods (use '99' if N/A):

Maximum Lung Growth: \_\_\_\_ . \_\_\_\_

Start of Plateau: \_\_\_\_ . \_\_\_\_

Start of Decline: \_\_\_\_ . \_\_\_\_



### Pre-BD FEV1 Data and Percentiles: 1622

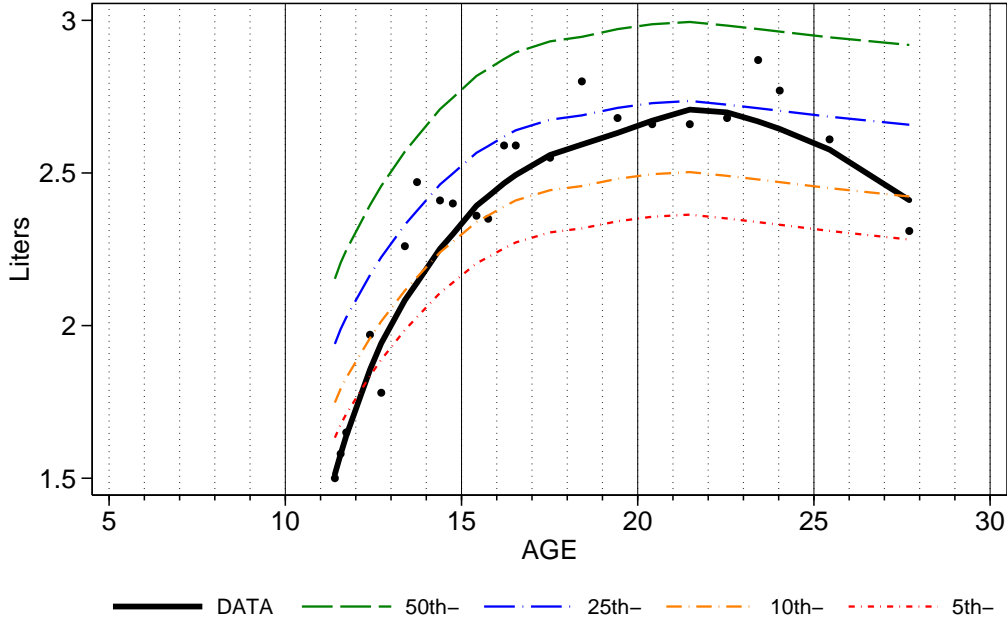

1622

**PATTERN OF GROWTH/DECLINE (Check One)**

- ( 1 ) Normal Growth
- ( 2 ) Normal Growth, Early Decline
- ( 3 ) Reduced Growth
- ( 4 ) Reduced Growth, Early Decline
- ( 9 ) Undetermined Pattern
- ( 8 ) Undetermined - not enough data

Maximum lung growth attained: ( 1 ) Yes ( 0 ) No

Plateau started: ( 2 ) No plateau ( 1 ) Yes ( 0 ) No

Decline started: ( 1 ) Yes ( 0 ) No

AGE AT each of the following periods (use '99' if N/A):

Maximum Lung Growth: \_\_\_\_ . \_\_\_\_

Start of Plateau: \_\_\_\_ . \_\_\_\_

Start of Decline: \_\_\_\_ . \_\_\_\_

### Pre-BD FEV1 Data and Percentiles: 1633

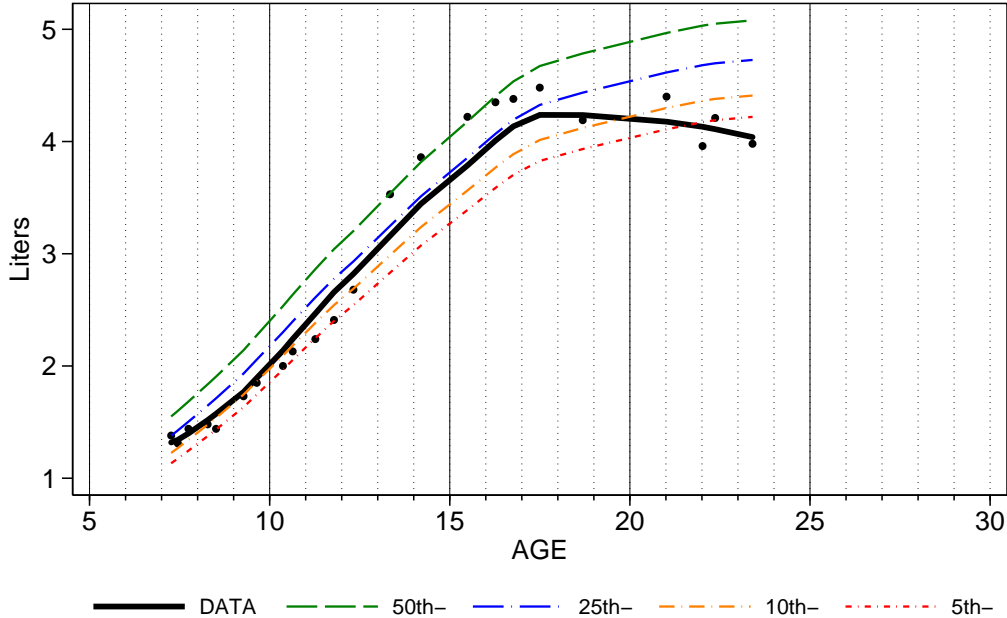

1633

**PATTERN OF GROWTH/DECLINE (Check One)**

- ( 1) Normal Growth
- ( 2) Normal Growth, Early Decline
- ( 3) Reduced Growth
- ( 4) Reduced Growth, Early Decline
- ( 9) Undetermined Pattern
- ( 8) Undetermined - not enough data

Maximum lung growth attained: ( 1) Yes ( 0) No

Plateau started: ( 2) No plateau ( 1) Yes ( 0) No

Decline started: ( 1) Yes ( 0) No

AGE AT each of the following periods (use '99' if N/A):

Maximum Lung Growth: \_\_\_\_ . \_\_\_\_

Start of Plateau: \_\_\_\_ . \_\_\_\_

Start of Decline: \_\_\_\_ . \_\_\_\_

### Pre-BD FEV1 Data and Percentiles: 1635

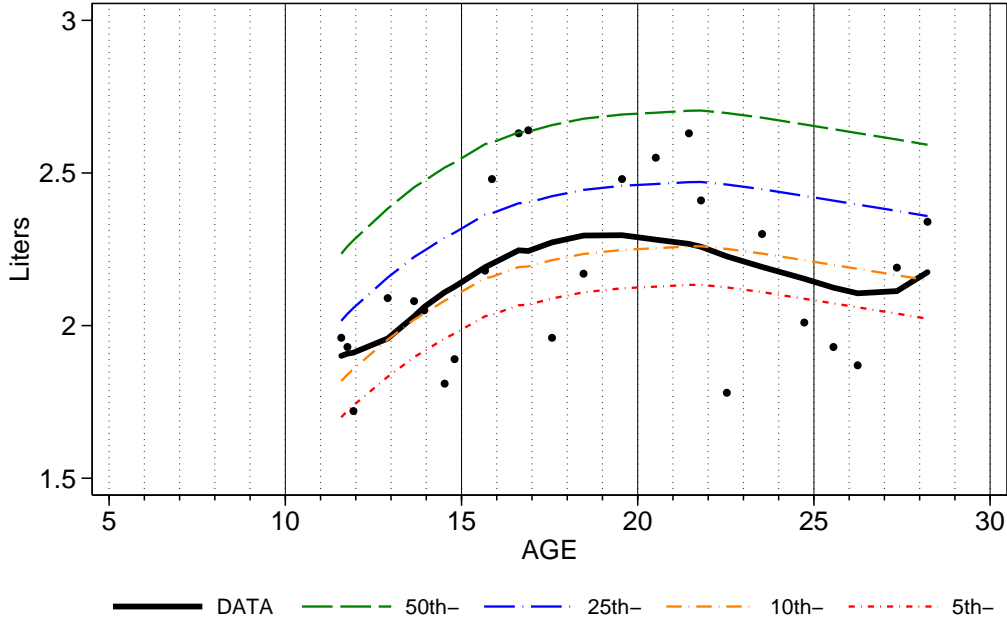

1635

**PATTERN OF GROWTH/DECLINE (Check One)**

- ( 1) Normal Growth
- ( 2) Normal Growth, Early Decline
- ( 3) Reduced Growth
- ( 4) Reduced Growth, Early Decline
- ( 9) Undetermined Pattern
- ( 8) Undetermined - not enough data

Maximum lung growth attained: ( 1) Yes ( 0) No

Plateau started: ( 2) No plateau ( 1) Yes ( 0) No

Decline started: ( 1) Yes ( 0) No

AGE AT each of the following periods (use '99' if N/A):

Maximum Lung Growth: \_\_\_\_ . \_\_\_\_

Start of Plateau: \_\_\_\_ . \_\_\_\_

Start of Decline: \_\_\_\_ . \_\_\_\_

### Pre-BD FEV1 Data and Percentiles: 1638

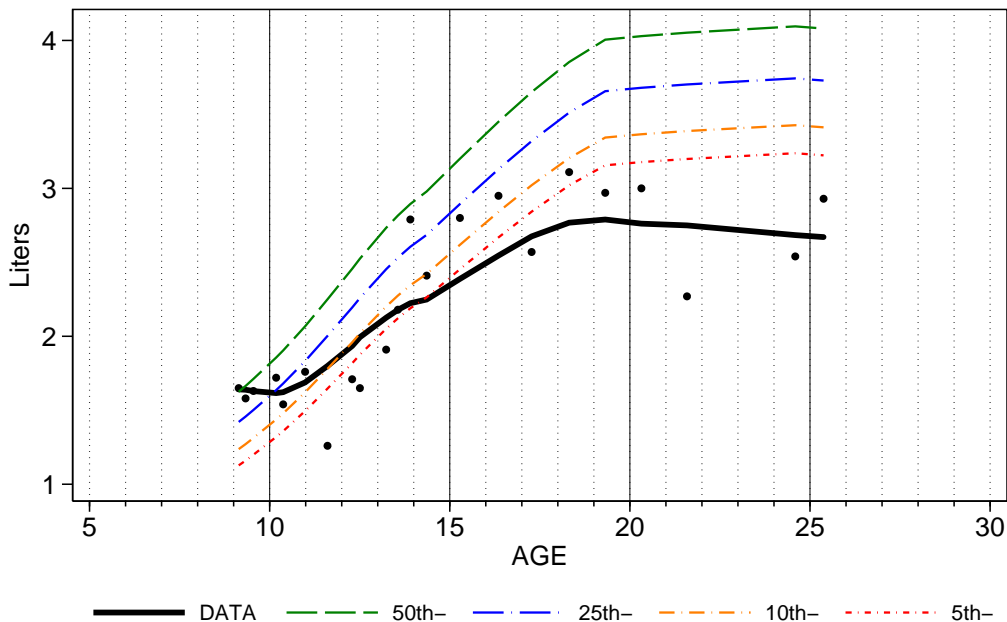

1638

**PATTERN OF GROWTH/DECLINE (Check One)**

- ( 1 ) Normal Growth
- ( 2 ) Normal Growth, Early Decline
- ( 3 ) Reduced Growth
- ( 4 ) Reduced Growth, Early Decline
- ( 9 ) Undetermined Pattern
- ( 8 ) Undetermined - not enough data

Maximum lung growth attained: ( 1 ) Yes ( 0 ) No

Plateau started: ( 2 ) No plateau ( 1 ) Yes ( 0 ) No

Decline started: ( 1 ) Yes ( 0 ) No

AGE AT each of the following periods (use '99' if N/A):

Maximum Lung Growth: \_\_\_\_ . \_\_\_\_

Start of Plateau: \_\_\_\_ . \_\_\_\_

Start of Decline: \_\_\_\_ . \_\_\_\_

### Pre-BD FEV1 Data and Percentiles: 1644

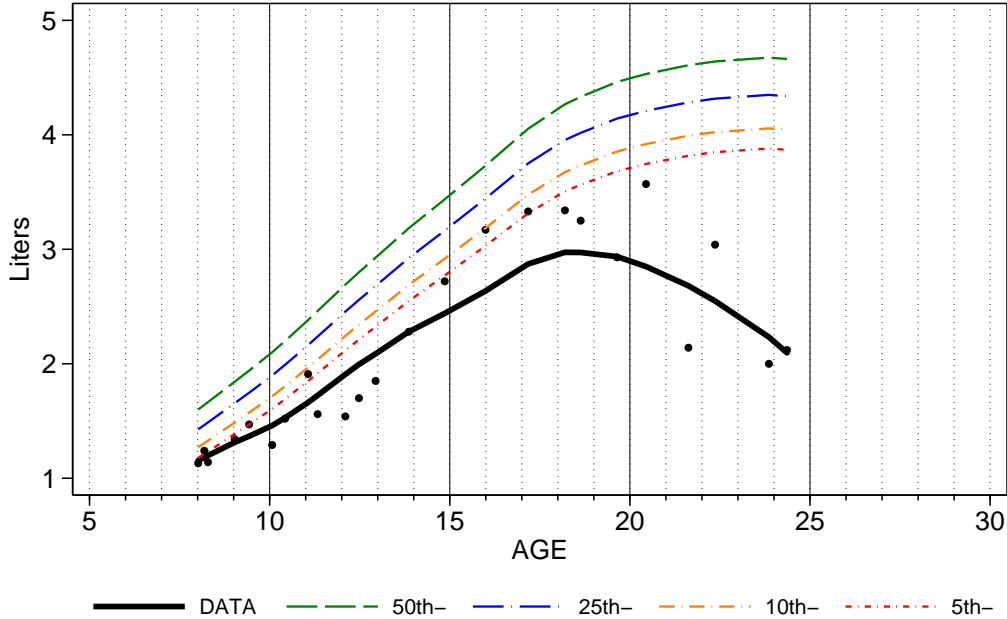

1644

**PATTERN OF GROWTH/DECLINE (Check One)**

- ( 1 ) Normal Growth
- ( 2 ) Normal Growth, Early Decline
- ( 3 ) Reduced Growth
- ( 4 ) Reduced Growth, Early Decline
- ( 9 ) Undetermined Pattern
- ( 8 ) Undetermined - not enough data

Maximum lung growth attained: ( 1 ) Yes ( 0 ) No

Plateau started: ( 2 ) No plateau ( 1 ) Yes ( 0 ) No

Decline started: ( 1 ) Yes ( 0 ) No

AGE AT each of the following periods (use '99' if N/A):

Maximum Lung Growth: \_\_\_\_ . \_\_\_\_

Start of Plateau: \_\_\_\_ . \_\_\_\_

Start of Decline: \_\_\_\_ . \_\_\_\_

### Pre-BD FEV1 Data and Percentiles: 1651

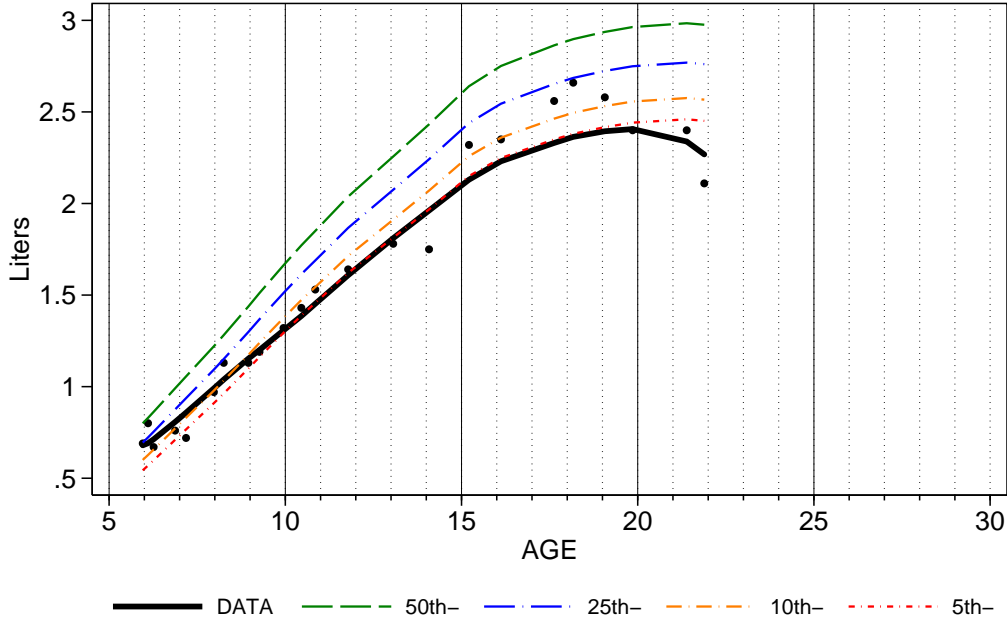

1651

**PATTERN OF GROWTH/DECLINE (Check One)**

- ( 1) Normal Growth
- ( 2) Normal Growth, Early Decline
- ( 3) Reduced Growth
- ( 4) Reduced Growth, Early Decline
- ( 9) Undetermined Pattern
- ( 8) Undetermined - not enough data

Maximum lung growth attained: ( 1) Yes ( 0) No

Plateau started: ( 2) No plateau ( 1) Yes ( 0) No

Decline started: ( 1) Yes ( 0) No

AGE AT each of the following periods (use '99' if N/A):

Maximum Lung Growth: \_\_\_\_ . \_\_\_\_

Start of Plateau: \_\_\_\_ . \_\_\_\_

Start of Decline: \_\_\_\_ . \_\_\_\_

### Pre-BD FEV1 Data and Percentiles: 1655

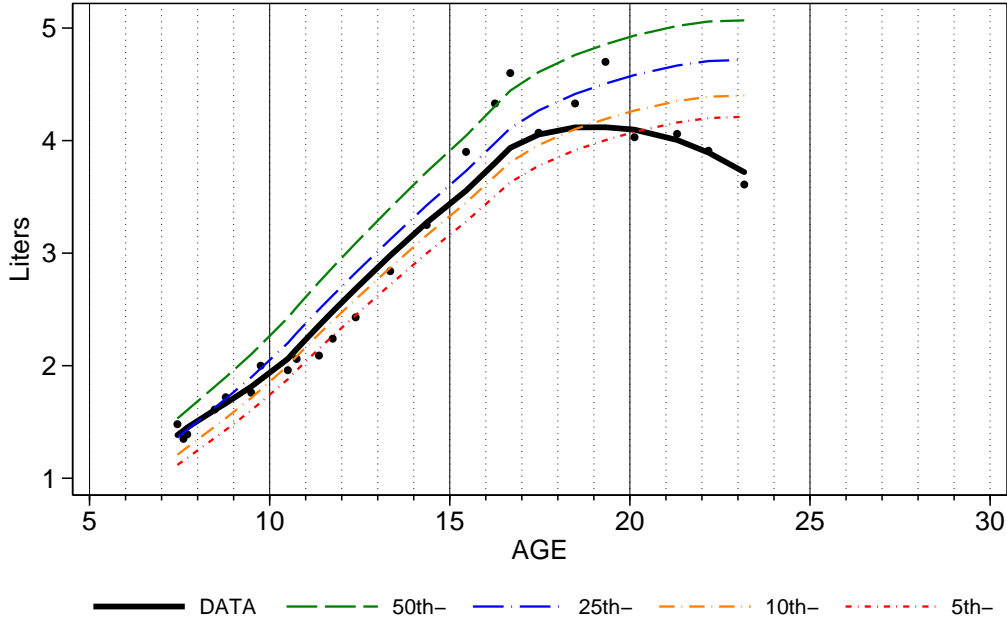

1655

**PATTERN OF GROWTH/DECLINE (Check One)**

- ( 1 ) Normal Growth
- ( 2 ) Normal Growth, Early Decline
- ( 3 ) Reduced Growth
- ( 4 ) Reduced Growth, Early Decline
- ( 9 ) Undetermined Pattern
- ( 8 ) Undetermined - not enough data

Maximum lung growth attained: ( 1 ) Yes ( 0 ) No

Plateau started: ( 2 ) No plateau ( 1 ) Yes ( 0 ) No

Decline started: ( 1 ) Yes ( 0 ) No

AGE AT each of the following periods (use '99' if N/A):

Maximum Lung Growth: \_\_\_\_ . \_\_\_\_

Start of Plateau: \_\_\_\_ . \_\_\_\_

Start of Decline: \_\_\_\_ . \_\_\_\_

### Pre-BD FEV1 Data and Percentiles: 1662

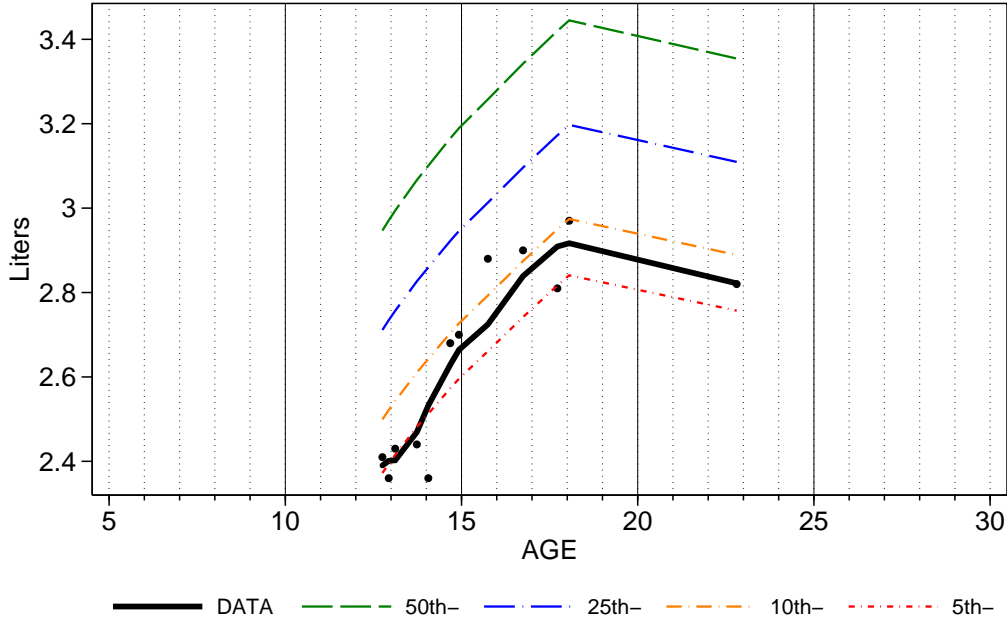

1662

**PATTERN OF GROWTH/DECLINE (Check One)**

- ( 1) Normal Growth
- ( 2) Normal Growth, Early Decline
- ( 3) Reduced Growth
- ( 4) Reduced Growth, Early Decline
- ( 9) Undetermined Pattern
- ( 8) Undetermined - not enough data

Maximum lung growth attained: ( 1) Yes ( 0) No

Plateau started: ( 2) No plateau ( 1) Yes ( 0) No

Decline started: ( 1) Yes ( 0) No

AGE AT each of the following periods (use '99' if N/A):

Maximum Lung Growth: \_\_\_\_ . \_\_\_\_

Start of Plateau: \_\_\_\_ . \_\_\_\_

Start of Decline: \_\_\_\_ . \_\_\_\_



### Pre-BD FEV1 Data and Percentiles: 1664

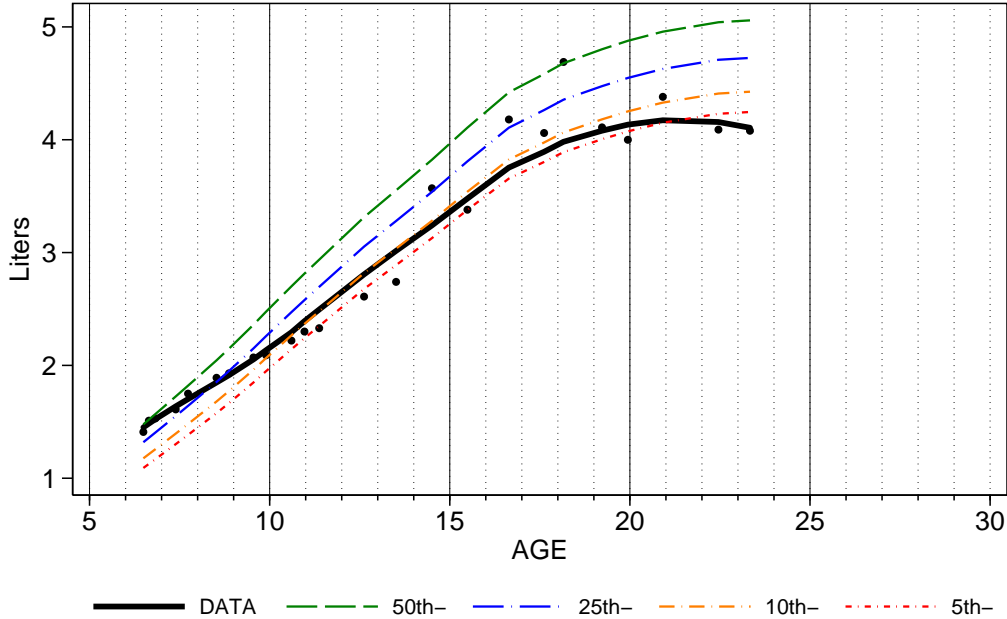

1664

**PATTERN OF GROWTH/DECLINE (Check One)**

- ( 1) Normal Growth
- ( 2) Normal Growth, Early Decline
- ( 3) Reduced Growth
- ( 4) Reduced Growth, Early Decline
- ( 9) Undetermined Pattern
- ( 8) Undetermined - not enough data

Maximum lung growth attained: ( 1) Yes ( 0) No

Plateau started: ( 2) No plateau ( 1) Yes ( 0) No

Decline started: ( 1) Yes ( 0) No

AGE AT each of the following periods (use '99' if N/A):

Maximum Lung Growth: \_\_\_\_ . \_\_\_\_

Start of Plateau: \_\_\_\_ . \_\_\_\_

Start of Decline: \_\_\_\_ . \_\_\_\_

### Pre-BD FEV1 Data and Percentiles: 1674

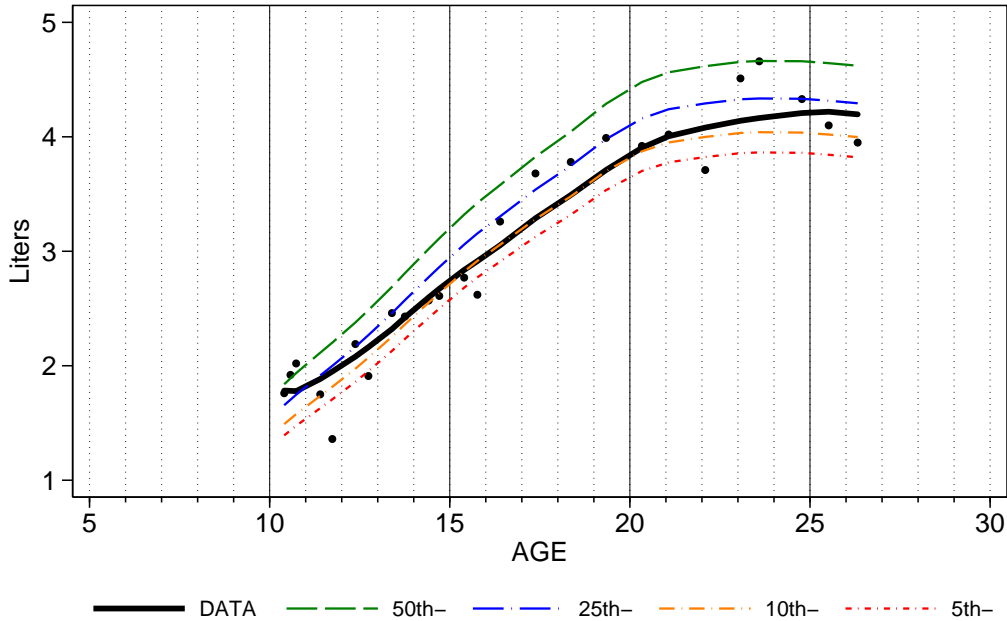

1674

**PATTERN OF GROWTH/DECLINE (Check One)**

- ( 1 ) Normal Growth
- ( 2 ) Normal Growth, Early Decline
- ( 3 ) Reduced Growth
- ( 4 ) Reduced Growth, Early Decline
- ( 9 ) Undetermined Pattern
- ( 8 ) Undetermined - not enough data

Maximum lung growth attained: ( 1 ) Yes ( 0 ) No

Plateau started: ( 2 ) No plateau ( 1 ) Yes ( 0 ) No

Decline started: ( 1 ) Yes ( 0 ) No

AGE AT each of the following periods (use '99' if N/A):

Maximum Lung Growth: \_\_\_\_ . \_\_\_\_

Start of Plateau: \_\_\_\_ . \_\_\_\_

Start of Decline: \_\_\_\_ . \_\_\_\_

### Pre-BD FEV1 Data and Percentiles: 1681

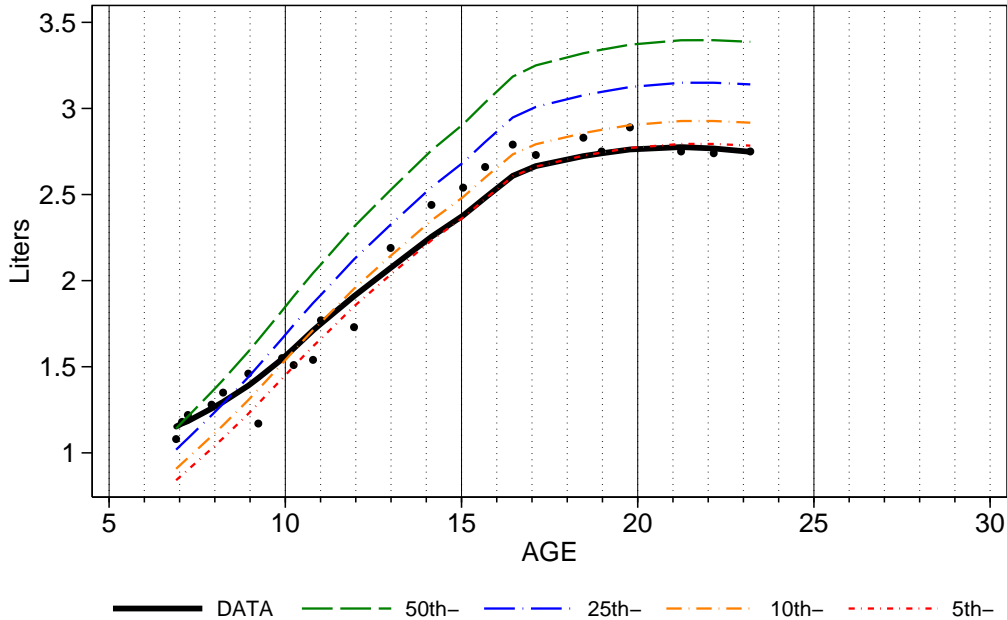

1681

**PATTERN OF GROWTH/DECLINE (Check One)**

- ( 1 ) Normal Growth
- ( 2 ) Normal Growth, Early Decline
- ( 3 ) Reduced Growth
- ( 4 ) Reduced Growth, Early Decline
- ( 9 ) Undetermined Pattern
- ( 8 ) Undetermined - not enough data

Maximum lung growth attained: ( 1 ) Yes ( 0 ) No

Plateau started: ( 2 ) No plateau ( 1 ) Yes ( 0 ) No

Decline started: ( 1 ) Yes ( 0 ) No

AGE AT each of the following periods (use '99' if N/A):

Maximum Lung Growth: \_\_\_\_ . \_\_\_\_

Start of Plateau: \_\_\_\_ . \_\_\_\_

Start of Decline: \_\_\_\_ . \_\_\_\_

### Pre-BD FEV1 Data and Percentiles: 1698

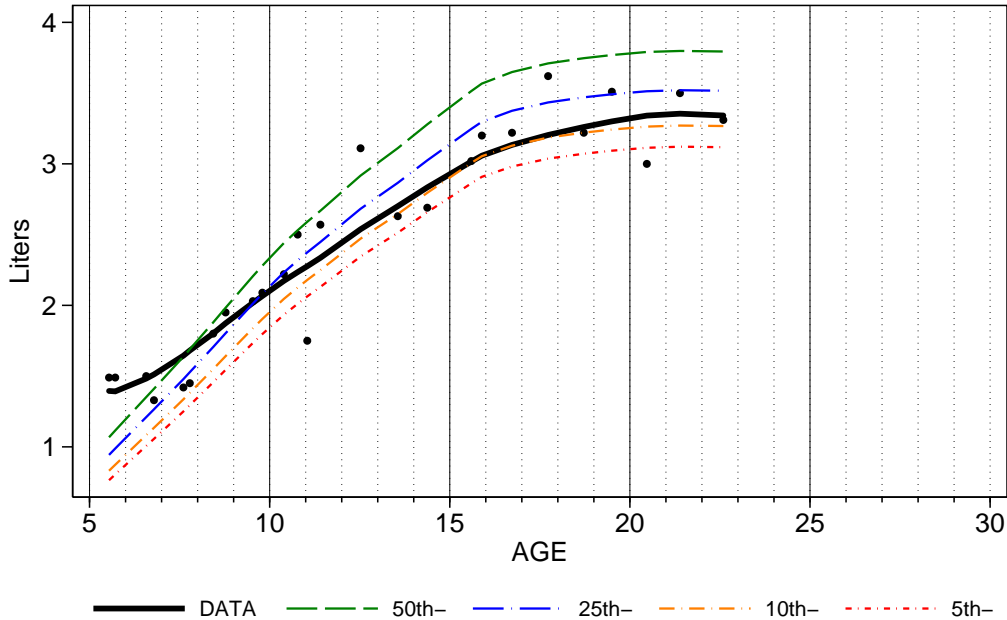

1698

**PATTERN OF GROWTH/DECLINE (Check One)**

- ( 1 ) Normal Growth
- ( 2 ) Normal Growth, Early Decline
- ( 3 ) Reduced Growth
- ( 4 ) Reduced Growth, Early Decline
- ( 9 ) Undetermined Pattern
- ( 8 ) Undetermined - not enough data

Maximum lung growth attained: ( 1 ) Yes ( 0 ) No

Plateau started: ( 2 ) No plateau ( 1 ) Yes ( 0 ) No

Decline started: ( 1 ) Yes ( 0 ) No

AGE AT each of the following periods (use '99' if N/A):

Maximum Lung Growth: \_\_\_\_ . \_\_\_\_

Start of Plateau: \_\_\_\_ . \_\_\_\_

Start of Decline: \_\_\_\_ . \_\_\_\_

### Pre-BD FEV1 Data and Percentiles: 1699

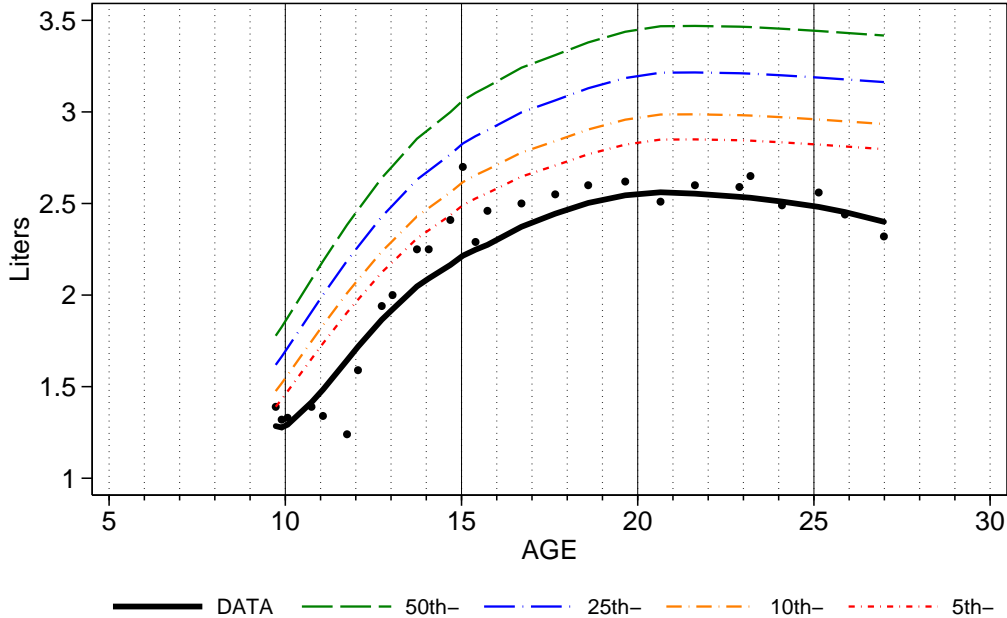

1699

**PATTERN OF GROWTH/DECLINE (Check One)**

- ( 1 ) Normal Growth
- ( 2 ) Normal Growth, Early Decline
- ( 3 ) Reduced Growth
- ( 4 ) Reduced Growth, Early Decline
- ( 9 ) Undetermined Pattern
- ( 8 ) Undetermined - not enough data

Maximum lung growth attained: ( 1 ) Yes ( 0 ) No

Plateau started: ( 2 ) No plateau ( 1 ) Yes ( 0 ) No

Decline started: ( 1 ) Yes ( 0 ) No

AGE AT each of the following periods (use '99' if N/A):

Maximum Lung Growth: \_\_\_\_ . \_\_\_\_

Start of Plateau: \_\_\_\_ . \_\_\_\_

Start of Decline: \_\_\_\_ . \_\_\_\_

### Pre-BD FEV1 Data and Percentiles: 1713

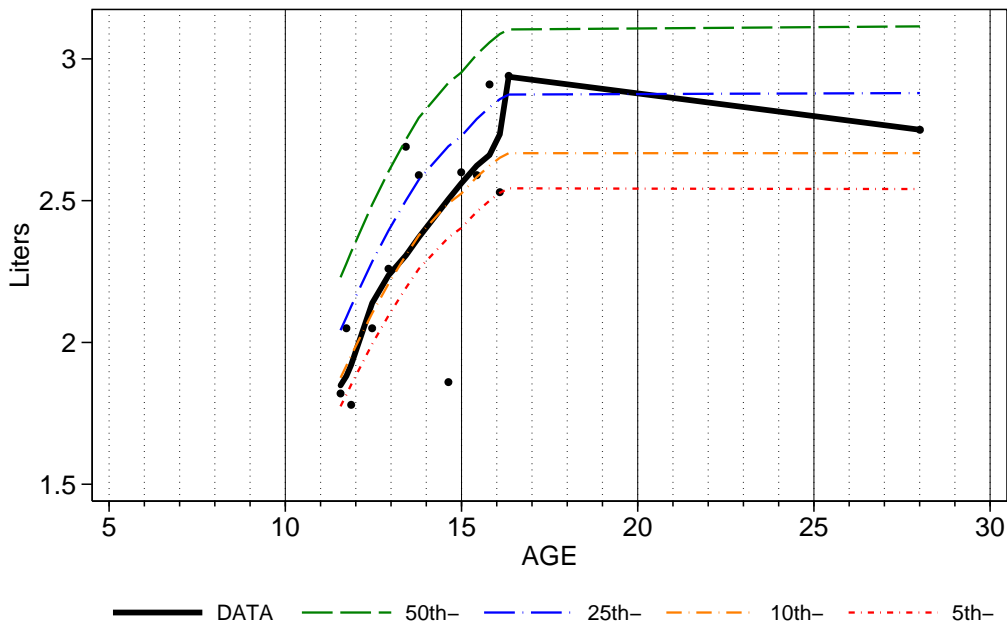

1713

**PATTERN OF GROWTH/DECLINE (Check One)**

- ( 1) Normal Growth
- ( 2) Normal Growth, Early Decline
- ( 3) Reduced Growth
- ( 4) Reduced Growth, Early Decline
- ( 9) Undetermined Pattern
- ( 8) Undetermined - not enough data

Maximum lung growth attained: ( 1) Yes ( 0) No

Plateau started: ( 2) No plateau ( 1) Yes ( 0) No

Decline started: ( 1) Yes ( 0) No

AGE AT each of the following periods (use '99' if N/A):

Maximum Lung Growth: \_\_\_\_ . \_\_\_\_

Start of Plateau: \_\_\_\_ . \_\_\_\_

Start of Decline: \_\_\_\_ . \_\_\_\_

### Pre-BD FEV1 Data and Percentiles: 1714

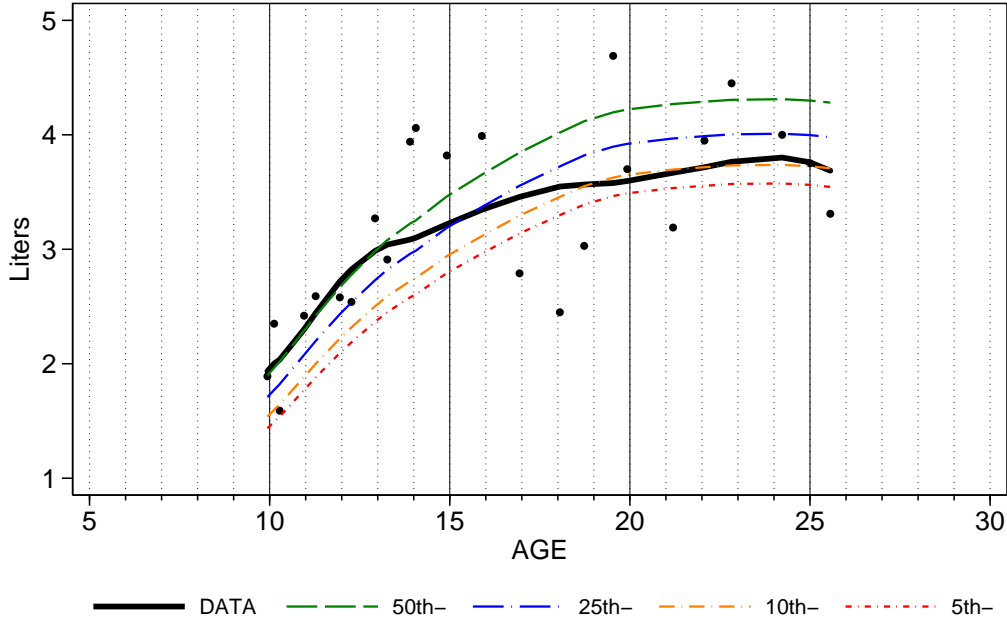

1714

**PATTERN OF GROWTH/DECLINE (Check One)**

- ( 1) Normal Growth
- ( 2) Normal Growth, Early Decline
- ( 3) Reduced Growth
- ( 4) Reduced Growth, Early Decline
- ( 9) Undetermined Pattern
- ( 8) Undetermined - not enough data

Maximum lung growth attained: ( 1) Yes ( 0) No

Plateau started: ( 2) No plateau ( 1) Yes ( 0) No

Decline started: ( 1) Yes ( 0) No

AGE AT each of the following periods (use '99' if N/A):

Maximum Lung Growth: \_\_\_\_ . \_\_\_\_

Start of Plateau: \_\_\_\_ . \_\_\_\_

Start of Decline: \_\_\_\_ . \_\_\_\_

### Pre-BD FEV1 Data and Percentiles: 1715

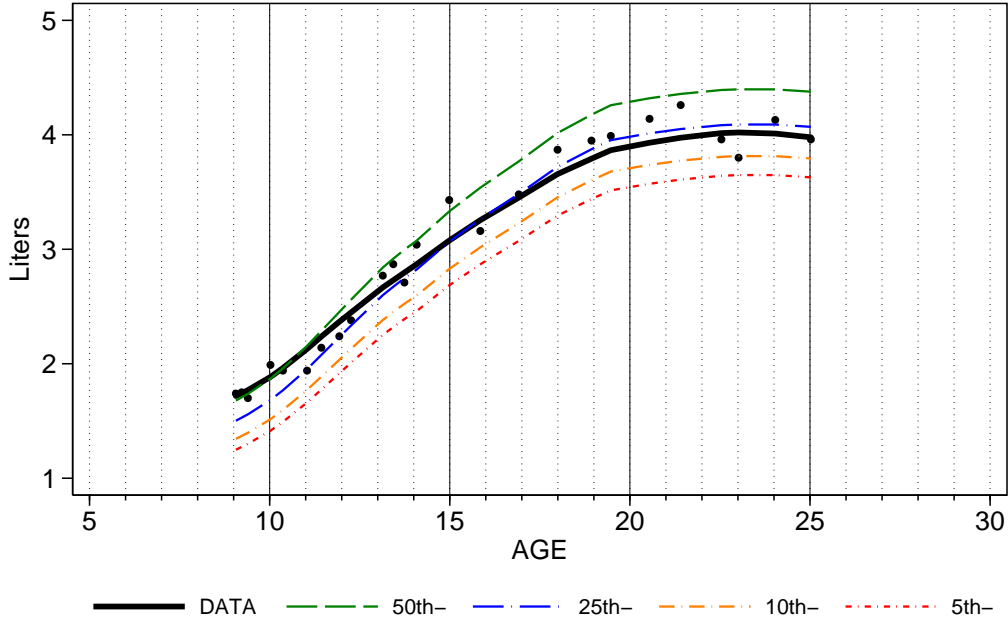

1715

**PATTERN OF GROWTH/DECLINE (Check One)**

- ( 1 ) Normal Growth
- ( 2 ) Normal Growth, Early Decline
- ( 3 ) Reduced Growth
- ( 4 ) Reduced Growth, Early Decline
- ( 9 ) Undetermined Pattern
- ( 8 ) Undetermined - not enough data

Maximum lung growth attained: ( 1 ) Yes ( 0 ) No

Plateau started: ( 2 ) No plateau ( 1 ) Yes ( 0 ) No

Decline started: ( 1 ) Yes ( 0 ) No

AGE AT each of the following periods (use '99' if N/A):

Maximum Lung Growth: \_\_\_\_ . \_\_\_\_

Start of Plateau: \_\_\_\_ . \_\_\_\_

Start of Decline: \_\_\_\_ . \_\_\_\_



### Pre-BD FEV1 Data and Percentiles: 1717

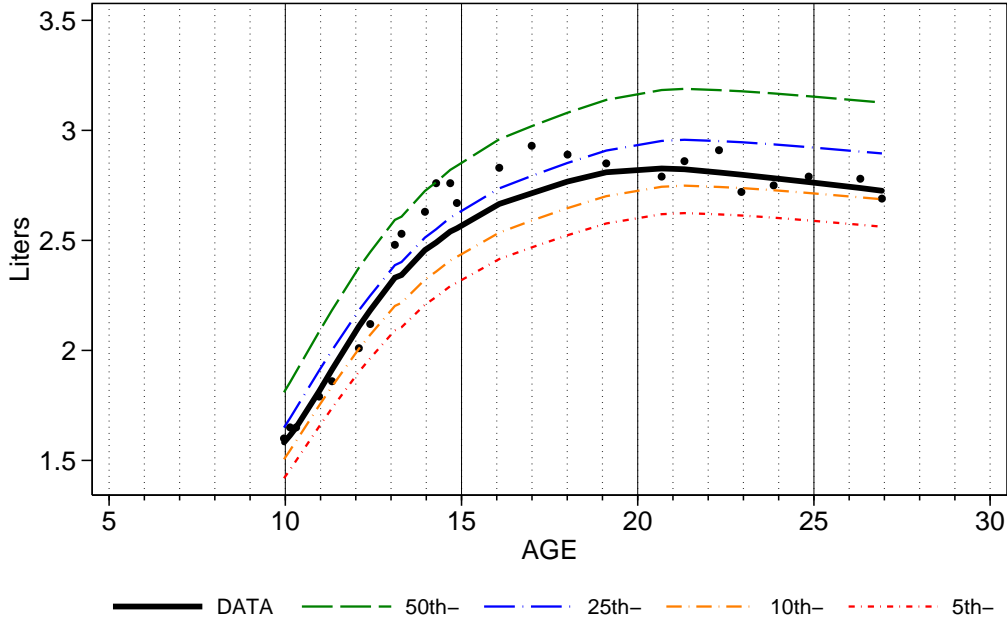

1717

**PATTERN OF GROWTH/DECLINE (Check One)**

- ( 1 ) Normal Growth
- ( 2 ) Normal Growth, Early Decline
- ( 3 ) Reduced Growth
- ( 4 ) Reduced Growth, Early Decline
- ( 9 ) Undetermined Pattern
- ( 8 ) Undetermined - not enough data

Maximum lung growth attained: ( 1 ) Yes ( 0 ) No

Plateau started: ( 2 ) No plateau ( 1 ) Yes ( 0 ) No

Decline started: ( 1 ) Yes ( 0 ) No

AGE AT each of the following periods (use '99' if N/A):

Maximum Lung Growth: \_\_\_\_ . \_\_\_\_

Start of Plateau: \_\_\_\_ . \_\_\_\_

Start of Decline: \_\_\_\_ . \_\_\_\_

### Pre-BD FEV1 Data and Percentiles: 1727

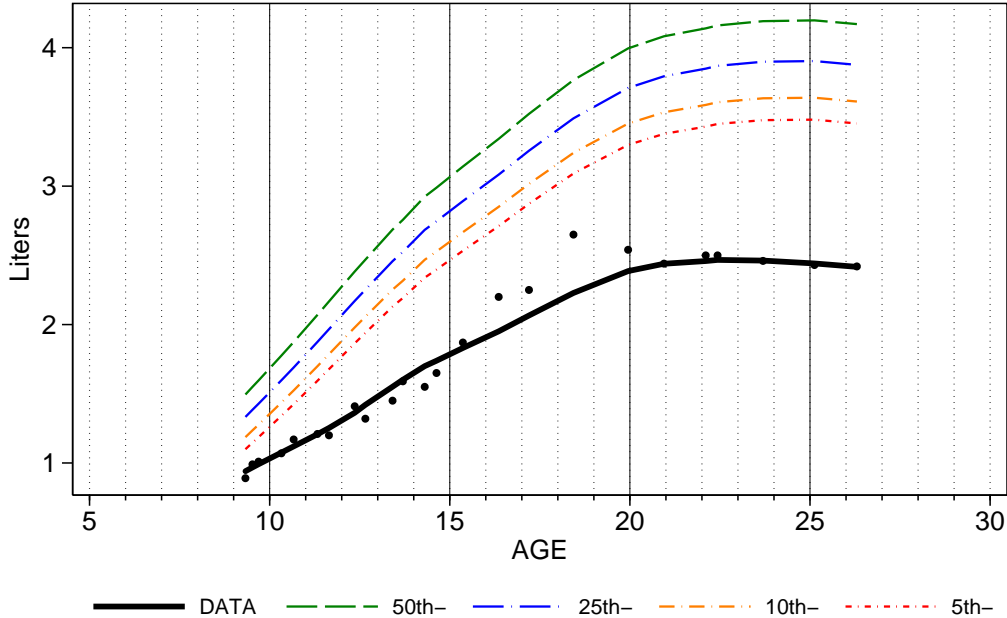

1727

**PATTERN OF GROWTH/DECLINE (Check One)**

- ( 1) Normal Growth
- ( 2) Normal Growth, Early Decline
- ( 3) Reduced Growth
- ( 4) Reduced Growth, Early Decline
- ( 9) Undetermined Pattern
- ( 8) Undetermined - not enough data

Maximum lung growth attained: ( 1) Yes ( 0) No

Plateau started: ( 2) No plateau ( 1) Yes ( 0) No

Decline started: ( 1) Yes ( 0) No

AGE AT each of the following periods (use '99' if N/A):

Maximum Lung Growth: \_\_\_\_ . \_\_\_\_

Start of Plateau: \_\_\_\_ . \_\_\_\_

Start of Decline: \_\_\_\_ . \_\_\_\_

### Pre-BD FEV1 Data and Percentiles: 1728

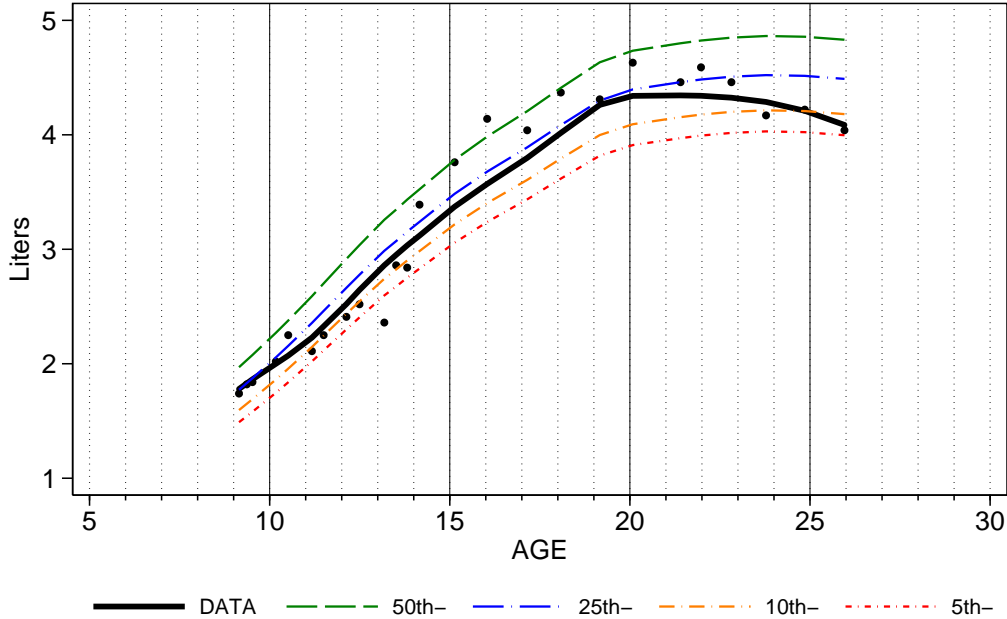

1728

**PATTERN OF GROWTH/DECLINE (Check One)**

- ( 1 ) Normal Growth
- ( 2 ) Normal Growth, Early Decline
- ( 3 ) Reduced Growth
- ( 4 ) Reduced Growth, Early Decline
- ( 9 ) Undetermined Pattern
- ( 8 ) Undetermined - not enough data

Maximum lung growth attained: ( 1 ) Yes ( 0 ) No

Plateau started: ( 2 ) No plateau ( 1 ) Yes ( 0 ) No

Decline started: ( 1 ) Yes ( 0 ) No

AGE AT each of the following periods (use '99' if N/A):

Maximum Lung Growth: \_\_\_\_ . \_\_\_\_

Start of Plateau: \_\_\_\_ . \_\_\_\_

Start of Decline: \_\_\_\_ . \_\_\_\_

### Pre-BD FEV1 Data and Percentiles: 1733

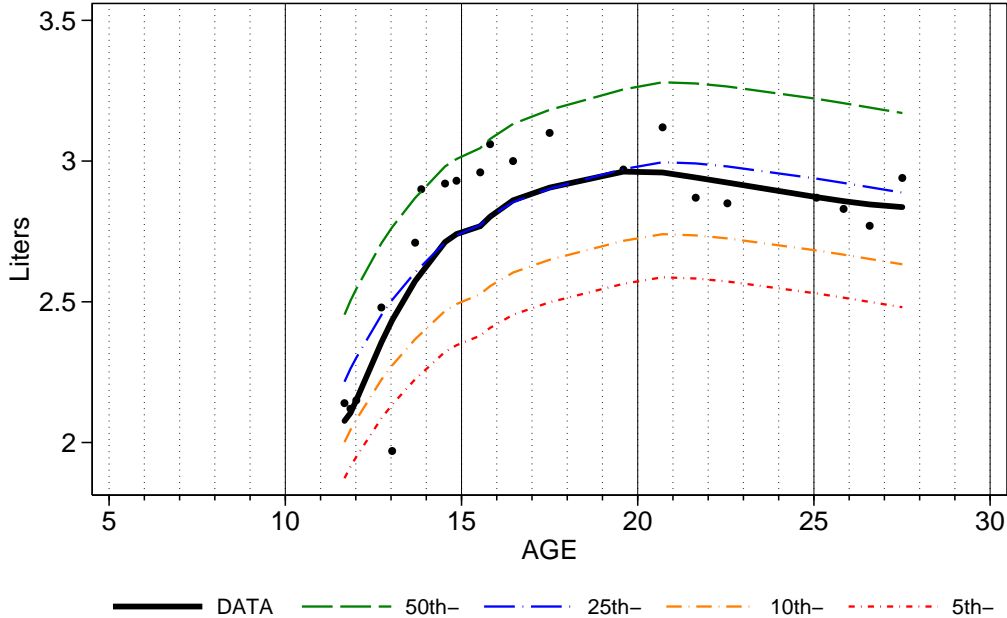

1733

**PATTERN OF GROWTH/DECLINE (Check One)**

- ( 1 ) Normal Growth
- ( 2 ) Normal Growth, Early Decline
- ( 3 ) Reduced Growth
- ( 4 ) Reduced Growth, Early Decline
- ( 9 ) Undetermined Pattern
- ( 8 ) Undetermined - not enough data

Maximum lung growth attained: ( 1 ) Yes ( 0 ) No

Plateau started: ( 2 ) No plateau ( 1 ) Yes ( 0 ) No

Decline started: ( 1 ) Yes ( 0 ) No

AGE AT each of the following periods (use '99' if N/A):

Maximum Lung Growth: \_\_\_\_ . \_\_\_\_

Start of Plateau: \_\_\_\_ . \_\_\_\_

Start of Decline: \_\_\_\_ . \_\_\_\_

### Pre-BD FEV1 Data and Percentiles: 1736

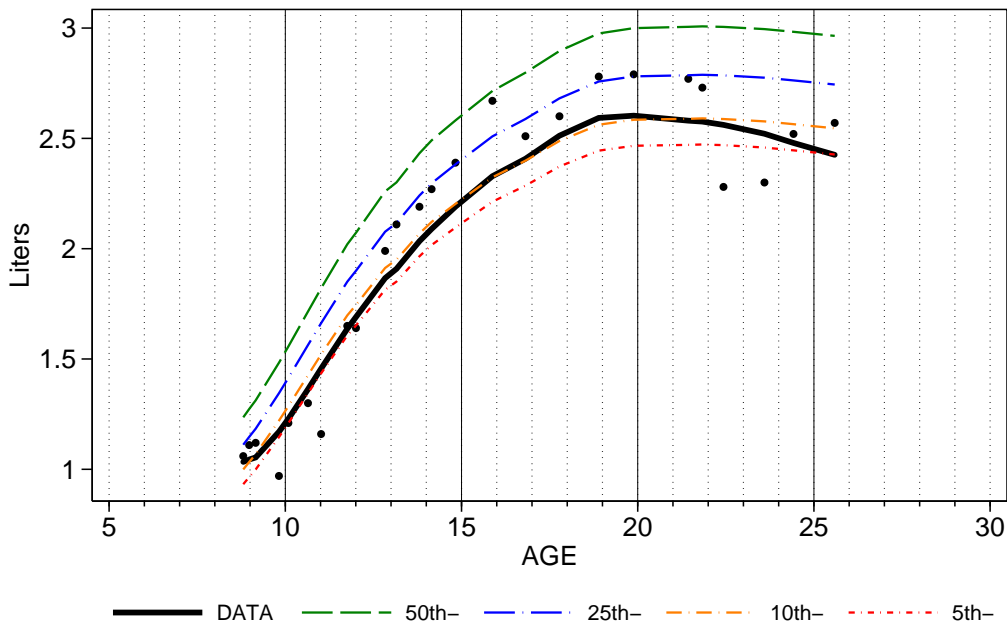

1736

**PATTERN OF GROWTH/DECLINE (Check One)**

- ( 1) Normal Growth
- ( 2) Normal Growth, Early Decline
- ( 3) Reduced Growth
- ( 4) Reduced Growth, Early Decline
- ( 9) Undetermined Pattern
- ( 8) Undetermined - not enough data

Maximum lung growth attained: ( 1) Yes ( 0) No

Plateau started: ( 2) No plateau ( 1) Yes ( 0) No

Decline started: ( 1) Yes ( 0) No

AGE AT each of the following periods (use '99' if N/A):

Maximum Lung Growth: \_\_\_\_ . \_\_\_\_

Start of Plateau: \_\_\_\_ . \_\_\_\_

Start of Decline: \_\_\_\_ . \_\_\_\_

### Pre-BD FEV1 Data and Percentiles: 1738

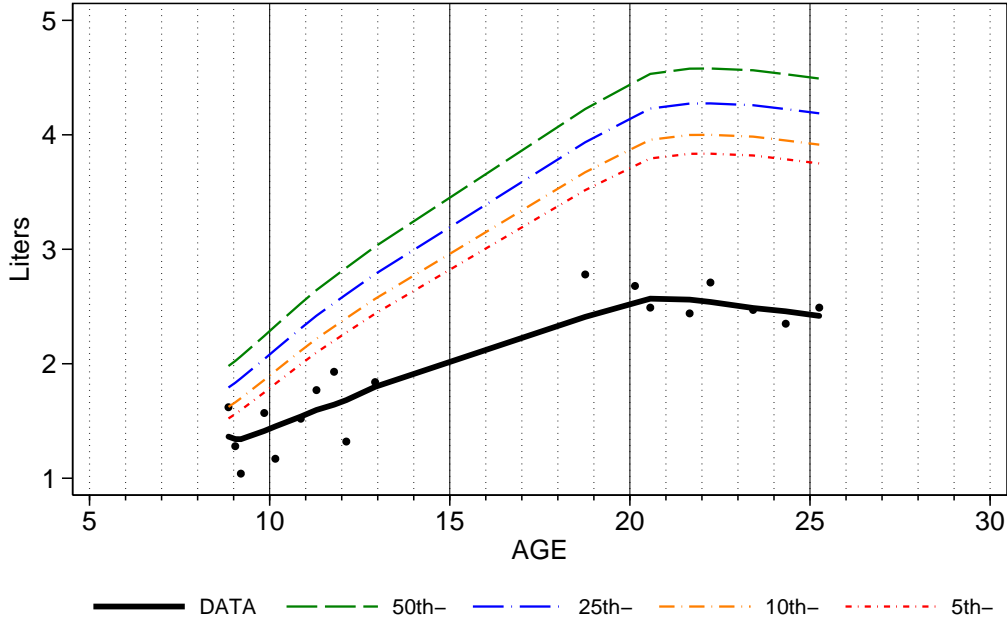

1738

**PATTERN OF GROWTH/DECLINE (Check One)**

- ( 1) Normal Growth
- ( 2) Normal Growth, Early Decline
- ( 3) Reduced Growth
- ( 4) Reduced Growth, Early Decline
- ( 9) Undetermined Pattern
- ( 8) Undetermined - not enough data

Maximum lung growth attained: ( 1) Yes ( 0) No

Plateau started: ( 2) No plateau ( 1) Yes ( 0) No

Decline started: ( 1) Yes ( 0) No

AGE AT each of the following periods (use '99' if N/A):

Maximum Lung Growth: \_\_\_\_ . \_\_\_\_

Start of Plateau: \_\_\_\_ . \_\_\_\_

Start of Decline: \_\_\_\_ . \_\_\_\_

### Pre-BD FEV1 Data and Percentiles: 1748

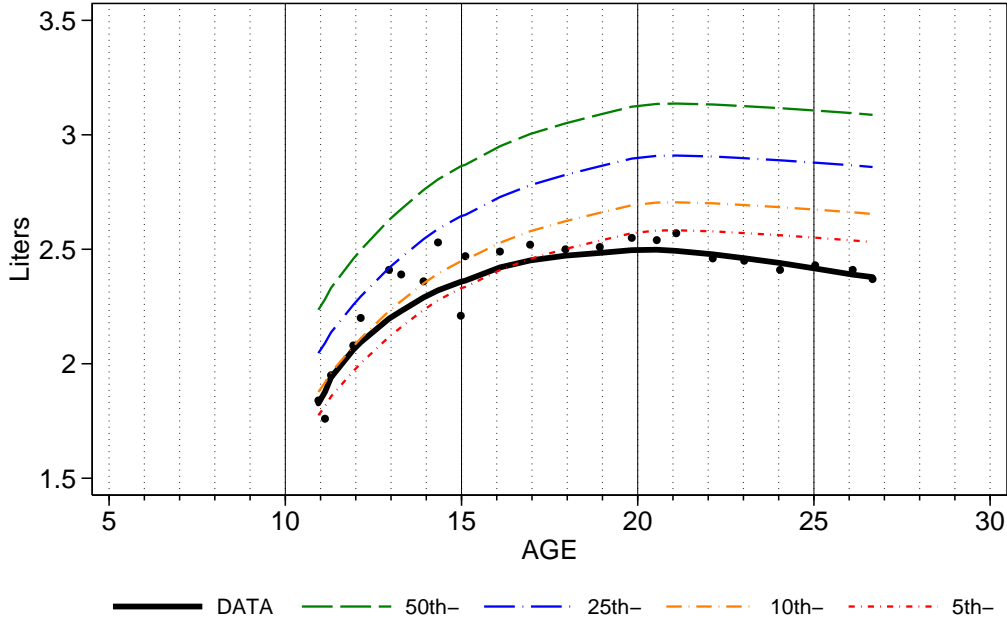

1748

**PATTERN OF GROWTH/DECLINE (Check One)**

- ( 1) Normal Growth
- ( 2) Normal Growth, Early Decline
- ( 3) Reduced Growth
- ( 4) Reduced Growth, Early Decline
- ( 9) Undetermined Pattern
- ( 8) Undetermined - not enough data

Maximum lung growth attained: ( 1) Yes ( 0) No

Plateau started: ( 2) No plateau ( 1) Yes ( 0) No

Decline started: ( 1) Yes ( 0) No

AGE AT each of the following periods (use '99' if N/A):

Maximum Lung Growth: \_\_\_\_ . \_\_\_\_

Start of Plateau: \_\_\_\_ . \_\_\_\_

Start of Decline: \_\_\_\_ . \_\_\_\_

### Pre-BD FEV1 Data and Percentiles: 1750

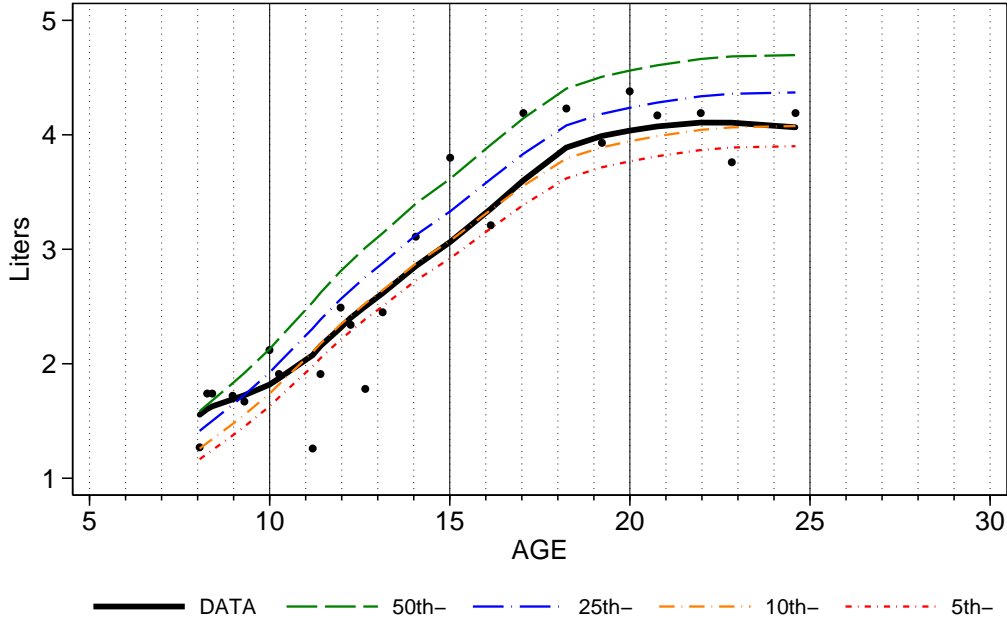

1750

**PATTERN OF GROWTH/DECLINE (Check One)**

- ( 1 ) Normal Growth
- ( 2 ) Normal Growth, Early Decline
- ( 3 ) Reduced Growth
- ( 4 ) Reduced Growth, Early Decline
- ( 9 ) Undetermined Pattern
- ( 8 ) Undetermined - not enough data

Maximum lung growth attained: ( 1 ) Yes ( 0 ) No

Plateau started: ( 2 ) No plateau ( 1 ) Yes ( 0 ) No

Decline started: ( 1 ) Yes ( 0 ) No

AGE AT each of the following periods (use '99' if N/A):

Maximum Lung Growth: \_\_\_\_ . \_\_\_\_

Start of Plateau: \_\_\_\_ . \_\_\_\_

Start of Decline: \_\_\_\_ . \_\_\_\_



### Pre-BD FEV1 Data and Percentiles: 1762

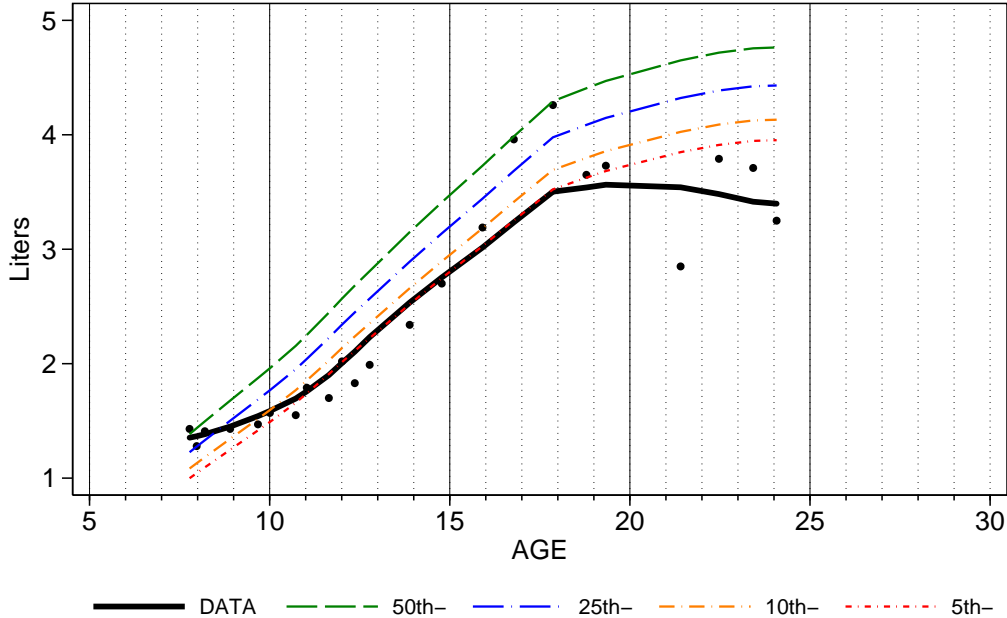

1762

**PATTERN OF GROWTH/DECLINE (Check One)**

- ( 1 ) Normal Growth
- ( 2 ) Normal Growth, Early Decline
- ( 3 ) Reduced Growth
- ( 4 ) Reduced Growth, Early Decline
- ( 9 ) Undetermined Pattern
- ( 8 ) Undetermined - not enough data

Maximum lung growth attained: ( 1 ) Yes ( 0 ) No

Plateau started: ( 2 ) No plateau ( 1 ) Yes ( 0 ) No

Decline started: ( 1 ) Yes ( 0 ) No

AGE AT each of the following periods (use '99' if N/A):

Maximum Lung Growth: \_\_\_\_ . \_\_\_\_

Start of Plateau: \_\_\_\_ . \_\_\_\_

Start of Decline: \_\_\_\_ . \_\_\_\_

### Pre-BD FEV1 Data and Percentiles: 1764

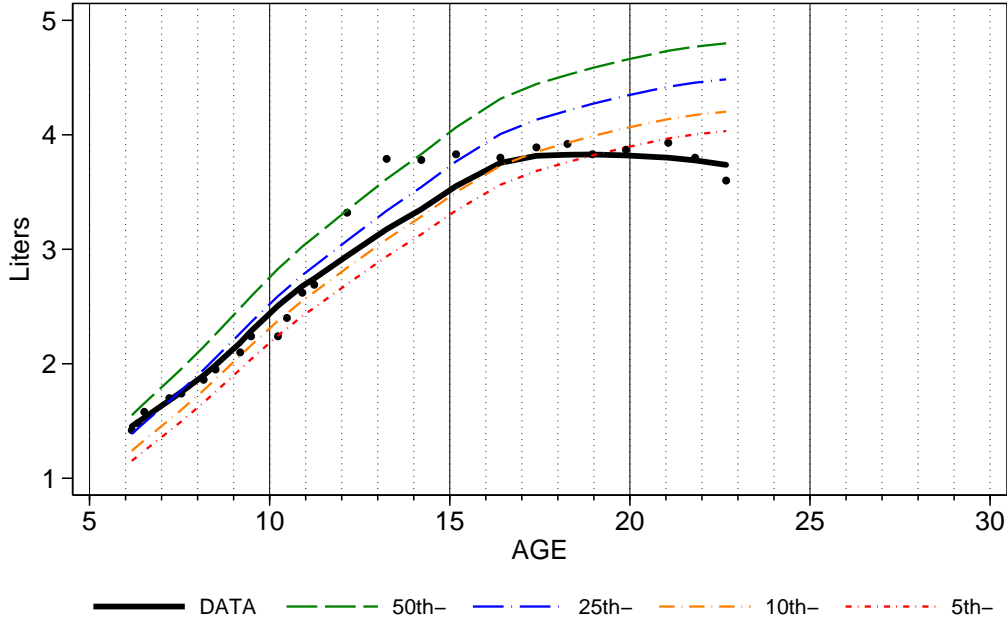

1764

**PATTERN OF GROWTH/DECLINE (Check One)**

- ( 1 ) Normal Growth
- ( 2 ) Normal Growth, Early Decline
- ( 3 ) Reduced Growth
- ( 4 ) Reduced Growth, Early Decline
- ( 9 ) Undetermined Pattern
- ( 8 ) Undetermined - not enough data

Maximum lung growth attained: ( 1 ) Yes ( 0 ) No

Plateau started: ( 2 ) No plateau ( 1 ) Yes ( 0 ) No

Decline started: ( 1 ) Yes ( 0 ) No

AGE AT each of the following periods (use '99' if N/A):

Maximum Lung Growth: \_\_\_\_ . \_\_\_\_

Start of Plateau: \_\_\_\_ . \_\_\_\_

Start of Decline: \_\_\_\_ . \_\_\_\_

### Pre-BD FEV1 Data and Percentiles: 1766

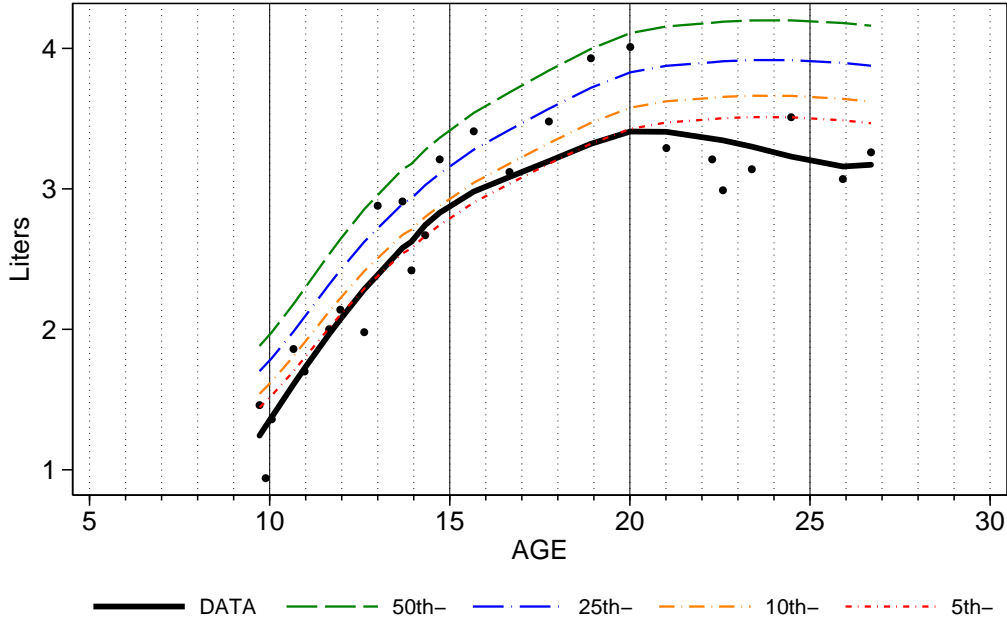

1766

**PATTERN OF GROWTH/DECLINE (Check One)**

- ( 1 ) Normal Growth
- ( 2 ) Normal Growth, Early Decline
- ( 3 ) Reduced Growth
- ( 4 ) Reduced Growth, Early Decline
- ( 9 ) Undetermined Pattern
- ( 8 ) Undetermined - not enough data

Maximum lung growth attained: ( 1 ) Yes ( 0 ) No

Plateau started: ( 2 ) No plateau ( 1 ) Yes ( 0 ) No

Decline started: ( 1 ) Yes ( 0 ) No

AGE AT each of the following periods (use '99' if N/A):

Maximum Lung Growth: \_\_\_\_ . \_\_\_\_

Start of Plateau: \_\_\_\_ . \_\_\_\_

Start of Decline: \_\_\_\_ . \_\_\_\_

### Pre-BD FEV1 Data and Percentiles: 1769

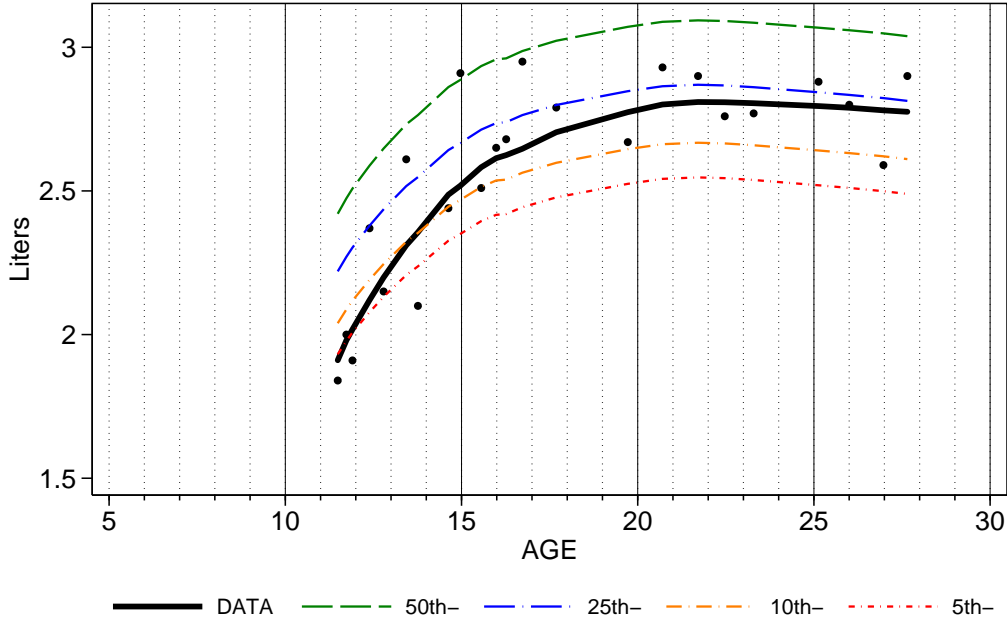

1769

**PATTERN OF GROWTH/DECLINE (Check One)**

- ( 1 ) Normal Growth
- ( 2 ) Normal Growth, Early Decline
- ( 3 ) Reduced Growth
- ( 4 ) Reduced Growth, Early Decline
- ( 9 ) Undetermined Pattern
- ( 8 ) Undetermined - not enough data

Maximum lung growth attained: ( 1 ) Yes ( 0 ) No

Plateau started: ( 2 ) No plateau ( 1 ) Yes ( 0 ) No

Decline started: ( 1 ) Yes ( 0 ) No

AGE AT each of the following periods (use '99' if N/A):

Maximum Lung Growth: \_\_\_\_ . \_\_\_\_

Start of Plateau: \_\_\_\_ . \_\_\_\_

Start of Decline: \_\_\_\_ . \_\_\_\_

### Pre-BD FEV1 Data and Percentiles: 1773

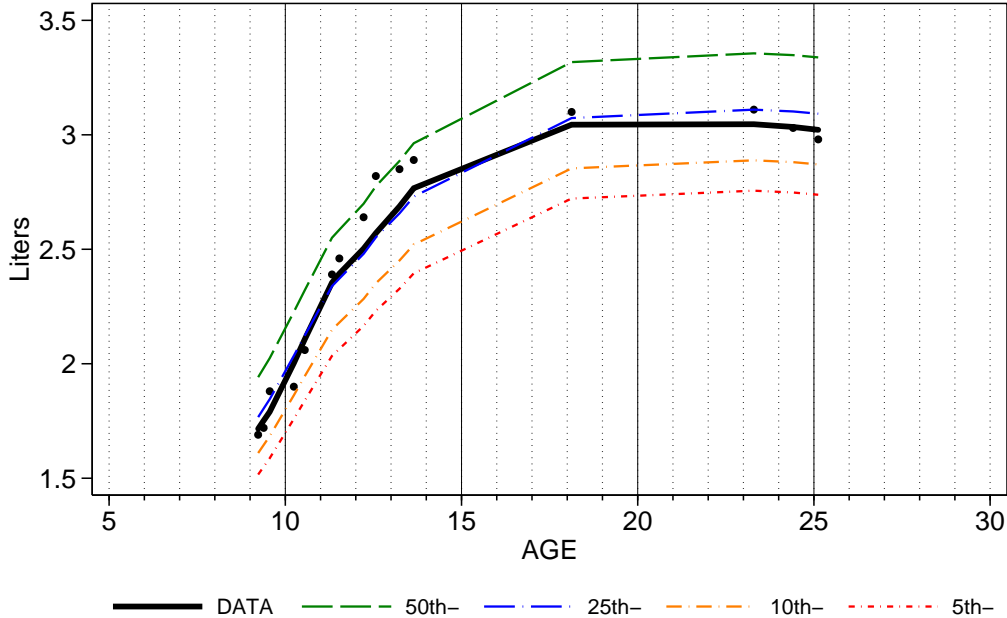

1773

**PATTERN OF GROWTH/DECLINE (Check One)**

- ( 1) Normal Growth
- ( 2) Normal Growth, Early Decline
- ( 3) Reduced Growth
- ( 4) Reduced Growth, Early Decline
- ( 9) Undetermined Pattern
- ( 8) Undetermined - not enough data

Maximum lung growth attained: ( 1) Yes ( 0) No

Plateau started: ( 2) No plateau ( 1) Yes ( 0) No

Decline started: ( 1) Yes ( 0) No

AGE AT each of the following periods (use '99' if N/A):

Maximum Lung Growth: \_\_\_\_ . \_\_\_\_

Start of Plateau: \_\_\_\_ . \_\_\_\_

Start of Decline: \_\_\_\_ . \_\_\_\_

### Pre-BD FEV1 Data and Percentiles: 1776

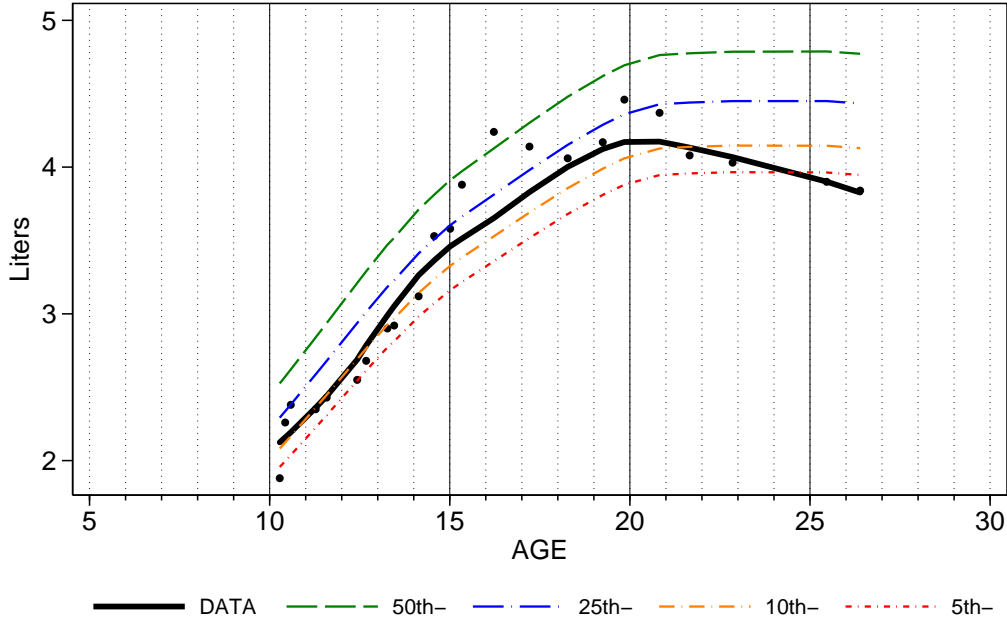

1776

**PATTERN OF GROWTH/DECLINE (Check One)**

- ( 1 ) Normal Growth
- ( 2 ) Normal Growth, Early Decline
- ( 3 ) Reduced Growth
- ( 4 ) Reduced Growth, Early Decline
- ( 9 ) Undetermined Pattern
- ( 8 ) Undetermined - not enough data

Maximum lung growth attained: ( 1 ) Yes ( 0 ) No

Plateau started: ( 2 ) No plateau ( 1 ) Yes ( 0 ) No

Decline started: ( 1 ) Yes ( 0 ) No

AGE AT each of the following periods (use '99' if N/A):

Maximum Lung Growth: \_\_\_\_ . \_\_\_\_

Start of Plateau: \_\_\_\_ . \_\_\_\_

Start of Decline: \_\_\_\_ . \_\_\_\_

### Pre-BD FEV1 Data and Percentiles: 1779

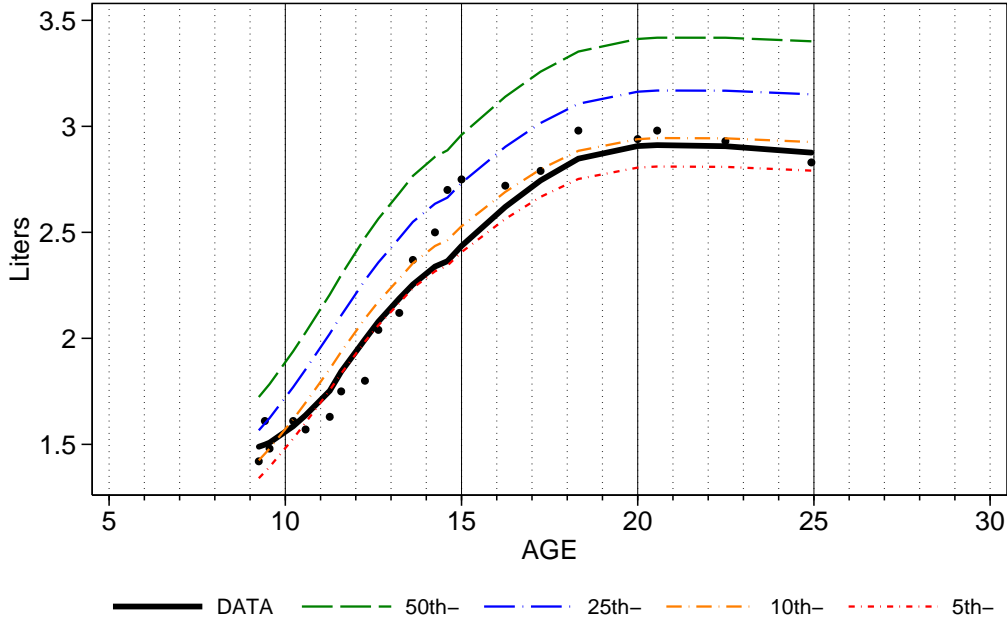

1779

**PATTERN OF GROWTH/DECLINE (Check One)**

- ( 1) Normal Growth
- ( 2) Normal Growth, Early Decline
- ( 3) Reduced Growth
- ( 4) Reduced Growth, Early Decline
- ( 9) Undetermined Pattern
- ( 8) Undetermined - not enough data

Maximum lung growth attained: ( 1) Yes ( 0) No

Plateau started: ( 2) No plateau ( 1) Yes ( 0) No

Decline started: ( 1) Yes ( 0) No

AGE AT each of the following periods (use '99' if N/A):

Maximum Lung Growth: \_\_\_\_ . \_\_\_\_

Start of Plateau: \_\_\_\_ . \_\_\_\_

Start of Decline: \_\_\_\_ . \_\_\_\_

### Pre-BD FEV1 Data and Percentiles: 1782

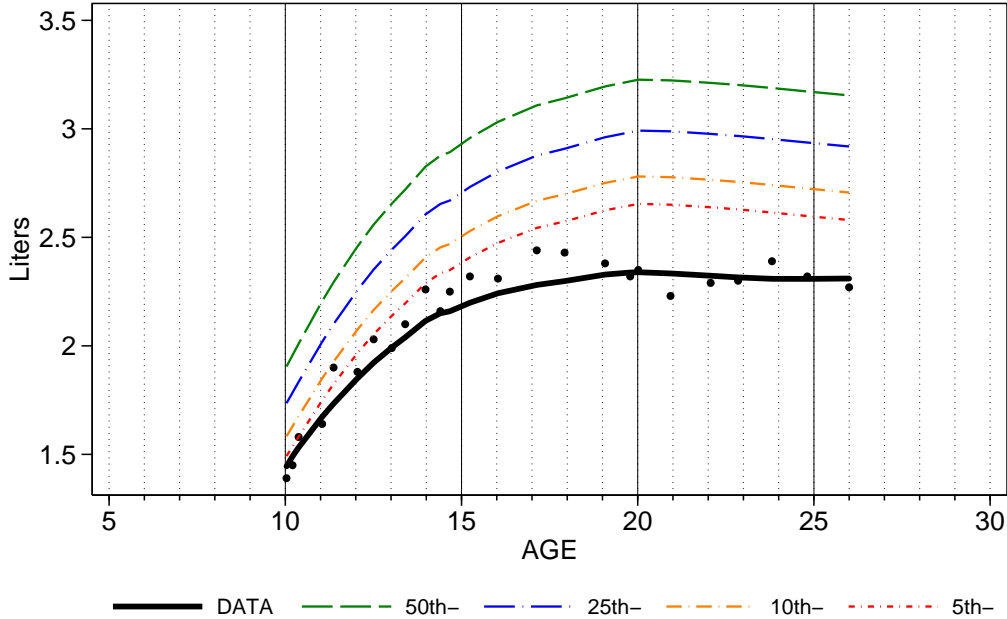

1782

**PATTERN OF GROWTH/DECLINE (Check One)**

- ( 1) Normal Growth
- ( 2) Normal Growth, Early Decline
- ( 3) Reduced Growth
- ( 4) Reduced Growth, Early Decline
- ( 9) Undetermined Pattern
- ( 8) Undetermined - not enough data

Maximum lung growth attained: ( 1) Yes ( 0) No

Plateau started: ( 2) No plateau ( 1) Yes ( 0) No

Decline started: ( 1) Yes ( 0) No

AGE AT each of the following periods (use '99' if N/A):

Maximum Lung Growth: \_\_\_\_ . \_\_\_\_

Start of Plateau: \_\_\_\_ . \_\_\_\_

Start of Decline: \_\_\_\_ . \_\_\_\_



### Pre-BD FEV1 Data and Percentiles: 1792

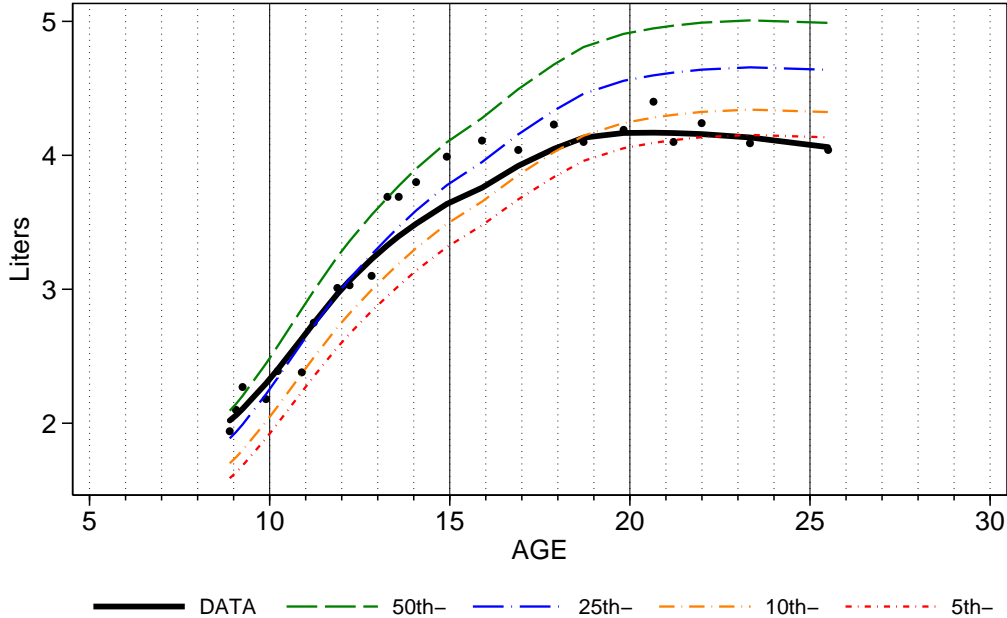

1792

**PATTERN OF GROWTH/DECLINE (Check One)**

- ( 1) Normal Growth
- ( 2) Normal Growth, Early Decline
- ( 3) Reduced Growth
- ( 4) Reduced Growth, Early Decline
- ( 9) Undetermined Pattern
- ( 8) Undetermined - not enough data

Maximum lung growth attained: ( 1) Yes ( 0) No

Plateau started: ( 2) No plateau ( 1) Yes ( 0) No

Decline started: ( 1) Yes ( 0) No

AGE AT each of the following periods (use '99' if N/A):

Maximum Lung Growth: \_\_\_\_ . \_\_\_\_

Start of Plateau: \_\_\_\_ . \_\_\_\_

Start of Decline: \_\_\_\_ . \_\_\_\_

### Pre-BD FEV1 Data and Percentiles: 1793

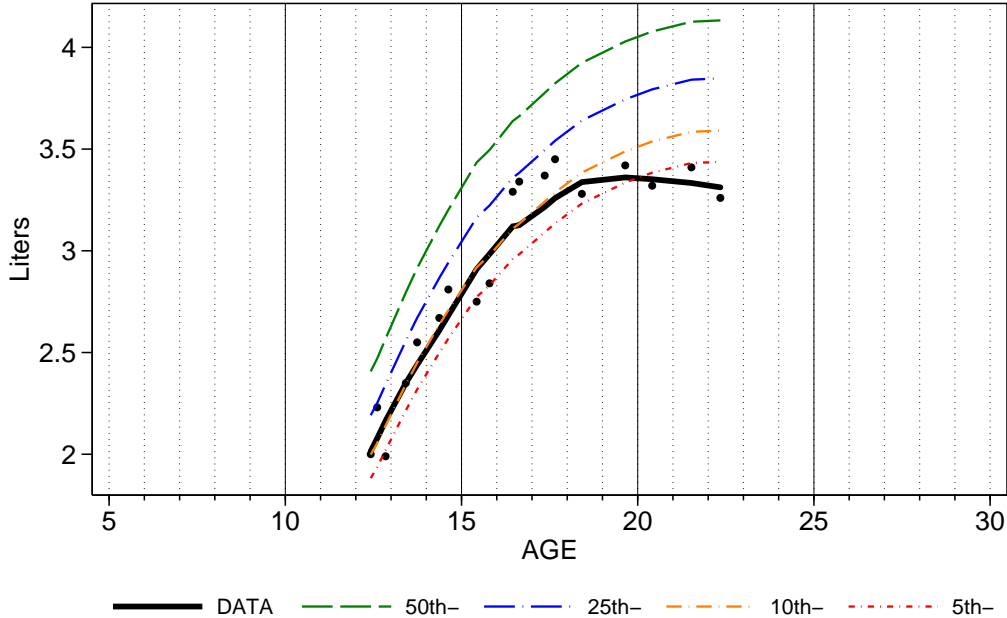

1793

**PATTERN OF GROWTH/DECLINE (Check One)**

- ( 1) Normal Growth
- ( 2) Normal Growth, Early Decline
- ( 3) Reduced Growth
- ( 4) Reduced Growth, Early Decline
- ( 9) Undetermined Pattern
- ( 8) Undetermined - not enough data

Maximum lung growth attained: ( 1) Yes ( 0) No

Plateau started: ( 2) No plateau ( 1) Yes ( 0) No

Decline started: ( 1) Yes ( 0) No

AGE AT each of the following periods (use '99' if N/A):

Maximum Lung Growth: \_\_\_\_ . \_\_\_\_

Start of Plateau: \_\_\_\_ . \_\_\_\_

Start of Decline: \_\_\_\_ . \_\_\_\_

### Pre-BD FEV1 Data and Percentiles: 1796

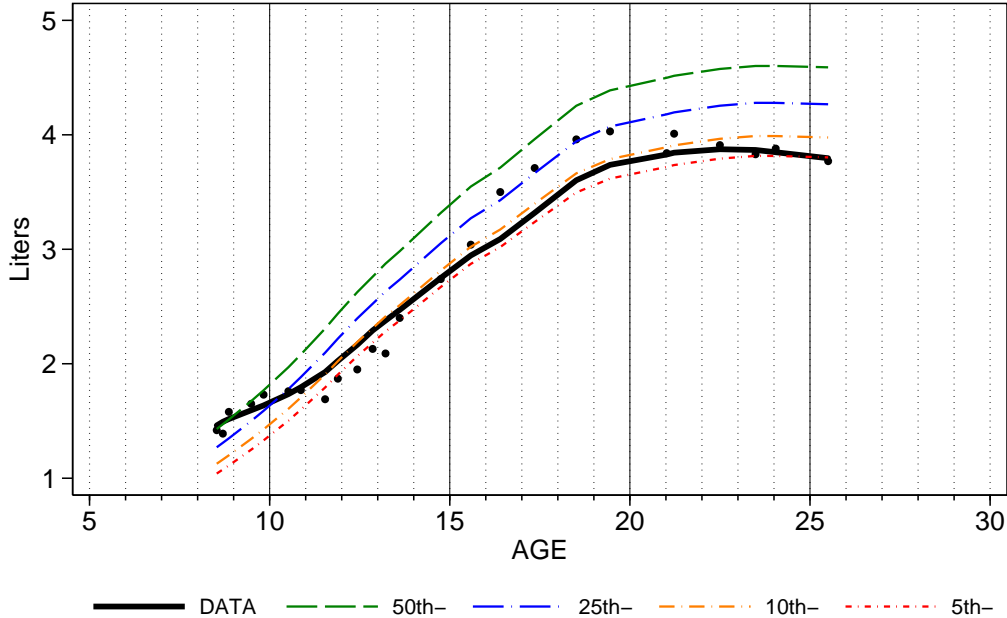

1796

**PATTERN OF GROWTH/DECLINE (Check One)**

- ( 1 ) Normal Growth
- ( 2 ) Normal Growth, Early Decline
- ( 3 ) Reduced Growth
- ( 4 ) Reduced Growth, Early Decline
- ( 9 ) Undetermined Pattern
- ( 8 ) Undetermined - not enough data

Maximum lung growth attained: ( 1 ) Yes ( 0 ) No

Plateau started: ( 2 ) No plateau ( 1 ) Yes ( 0 ) No

Decline started: ( 1 ) Yes ( 0 ) No

AGE AT each of the following periods (use '99' if N/A):

Maximum Lung Growth: \_\_\_\_ . \_\_\_\_

Start of Plateau: \_\_\_\_ . \_\_\_\_

Start of Decline: \_\_\_\_ . \_\_\_\_

### Pre-BD FEV1 Data and Percentiles: 1800

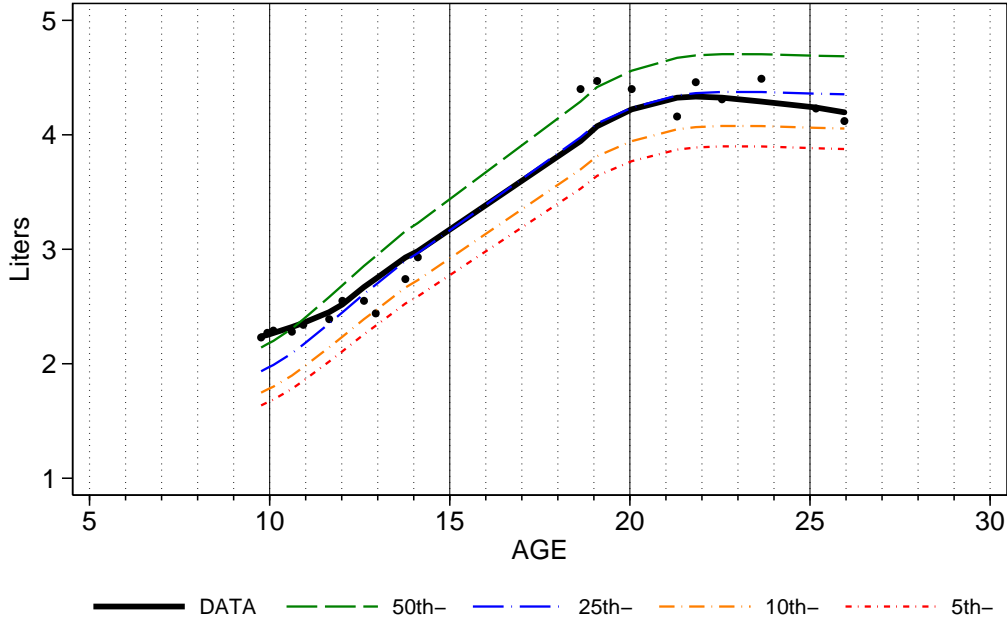

1800

**PATTERN OF GROWTH/DECLINE (Check One)**

- ( 1 ) Normal Growth
- ( 2 ) Normal Growth, Early Decline
- ( 3 ) Reduced Growth
- ( 4 ) Reduced Growth, Early Decline
- ( 9 ) Undetermined Pattern
- ( 8 ) Undetermined - not enough data

Maximum lung growth attained: ( 1 ) Yes ( 0 ) No

Plateau started: ( 2 ) No plateau ( 1 ) Yes ( 0 ) No

Decline started: ( 1 ) Yes ( 0 ) No

AGE AT each of the following periods (use '99' if N/A):

Maximum Lung Growth: \_\_\_\_ . \_\_\_\_

Start of Plateau: \_\_\_\_ . \_\_\_\_

Start of Decline: \_\_\_\_ . \_\_\_\_

### Pre-BD FEV1 Data and Percentiles: 1804

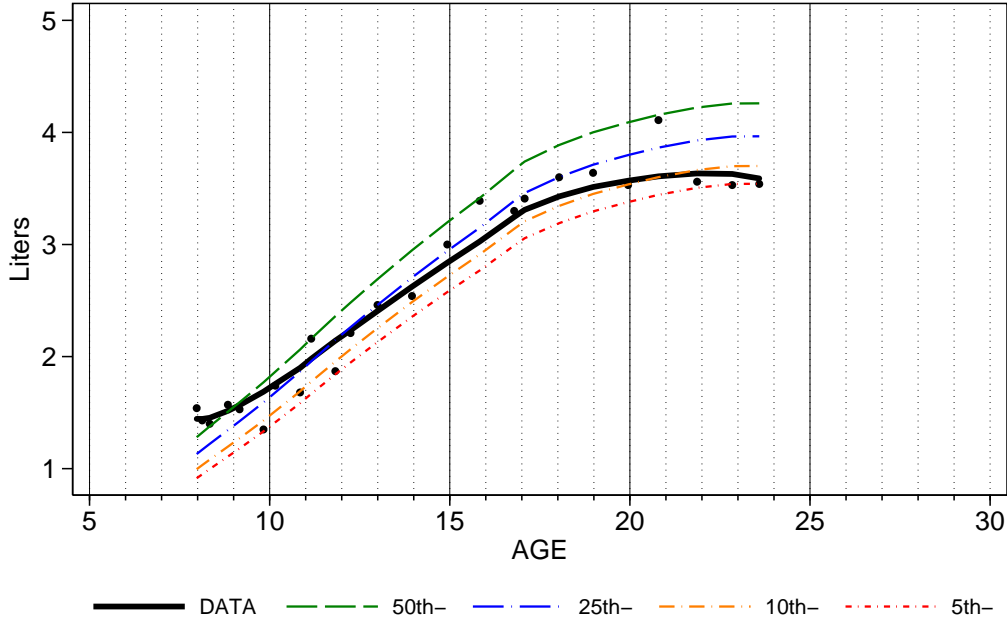

1804

**PATTERN OF GROWTH/DECLINE (Check One)**

- ( 1 ) Normal Growth
- ( 2 ) Normal Growth, Early Decline
- ( 3 ) Reduced Growth
- ( 4 ) Reduced Growth, Early Decline
- ( 9 ) Undetermined Pattern
- ( 8 ) Undetermined - not enough data

Maximum lung growth attained: ( 1 ) Yes ( 0 ) No

Plateau started: ( 2 ) No plateau ( 1 ) Yes ( 0 ) No

Decline started: ( 1 ) Yes ( 0 ) No

AGE AT each of the following periods (use '99' if N/A):

Maximum Lung Growth: \_\_\_\_ . \_\_\_\_

Start of Plateau: \_\_\_\_ . \_\_\_\_

Start of Decline: \_\_\_\_ . \_\_\_\_

### Pre-BD FEV1 Data and Percentiles: 1808

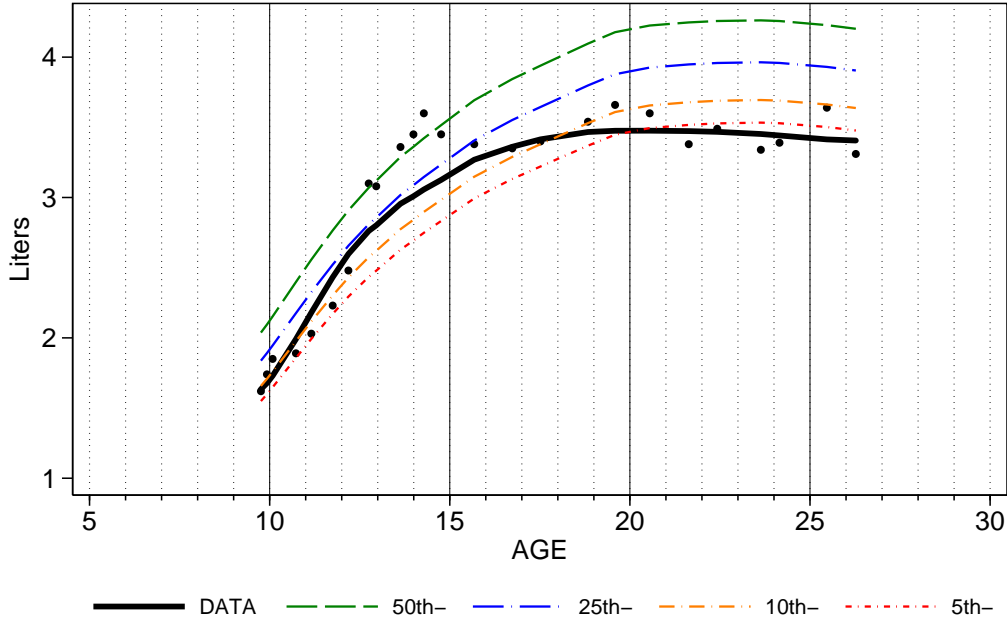

1808

**PATTERN OF GROWTH/DECLINE (Check One)**

- ( 1) Normal Growth
- ( 2) Normal Growth, Early Decline
- ( 3) Reduced Growth
- ( 4) Reduced Growth, Early Decline
- ( 9) Undetermined Pattern
- ( 8) Undetermined - not enough data

Maximum lung growth attained: ( 1) Yes ( 0) No

Plateau started: ( 2) No plateau ( 1) Yes ( 0) No

Decline started: ( 1) Yes ( 0) No

AGE AT each of the following periods (use '99' if N/A):

Maximum Lung Growth: \_\_\_\_ . \_\_\_\_

Start of Plateau: \_\_\_\_ . \_\_\_\_

Start of Decline: \_\_\_\_ . \_\_\_\_

### Pre-BD FEV1 Data and Percentiles: 1811

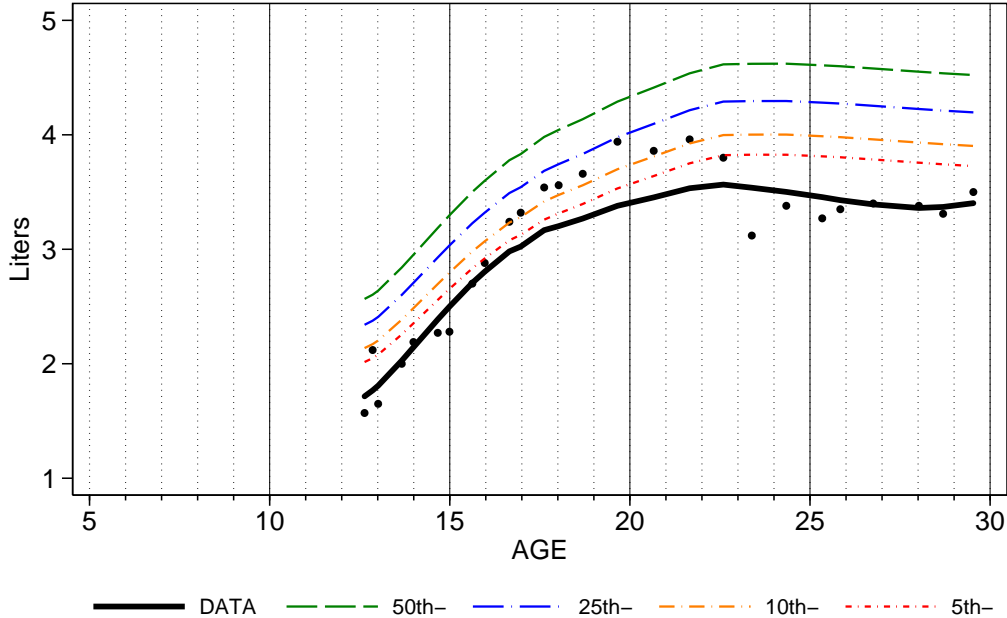

1811

**PATTERN OF GROWTH/DECLINE (Check One)**

- ( 1) Normal Growth
- ( 2) Normal Growth, Early Decline
- ( 3) Reduced Growth
- ( 4) Reduced Growth, Early Decline
- ( 9) Undetermined Pattern
- ( 8) Undetermined - not enough data

Maximum lung growth attained: ( 1) Yes ( 0) No

Plateau started: ( 2) No plateau ( 1) Yes ( 0) No

Decline started: ( 1) Yes ( 0) No

AGE AT each of the following periods (use '99' if N/A):

Maximum Lung Growth: \_\_\_\_ . \_\_\_\_

Start of Plateau: \_\_\_\_ . \_\_\_\_

Start of Decline: \_\_\_\_ . \_\_\_\_

### Pre-BD FEV1 Data and Percentiles: 1814

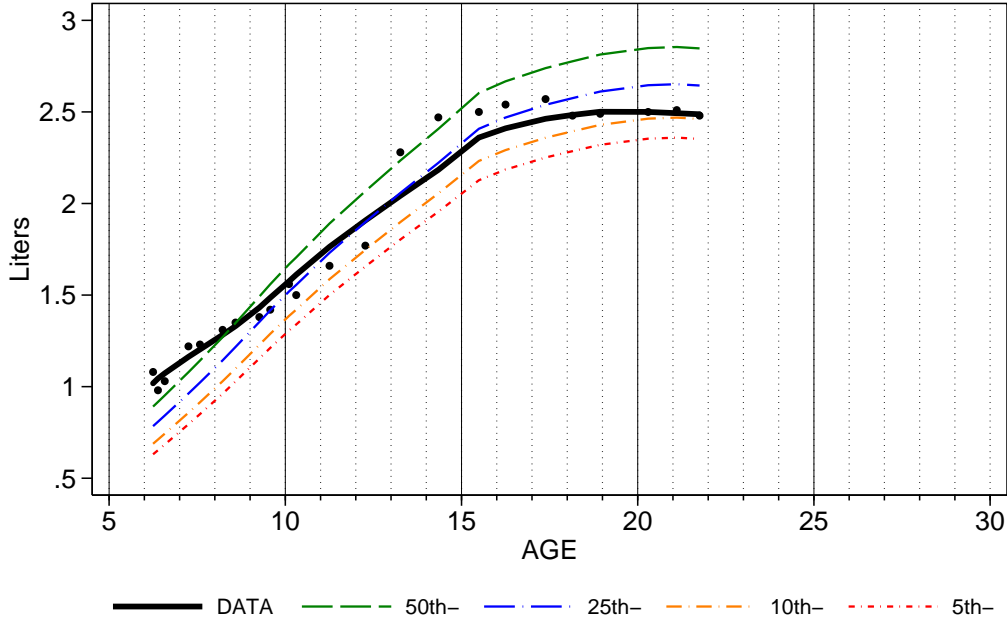

1814

**PATTERN OF GROWTH/DECLINE (Check One)**

- ( 1) Normal Growth
- ( 2) Normal Growth, Early Decline
- ( 3) Reduced Growth
- ( 4) Reduced Growth, Early Decline
- ( 9) Undetermined Pattern
- ( 8) Undetermined - not enough data

Maximum lung growth attained: ( 1) Yes ( 0) No

Plateau started: ( 2) No plateau ( 1) Yes ( 0) No

Decline started: ( 1) Yes ( 0) No

AGE AT each of the following periods (use '99' if N/A):

Maximum Lung Growth: \_\_\_\_ . \_\_\_\_

Start of Plateau: \_\_\_\_ . \_\_\_\_

Start of Decline: \_\_\_\_ . \_\_\_\_



### Pre-BD FEV1 Data and Percentiles: 1816

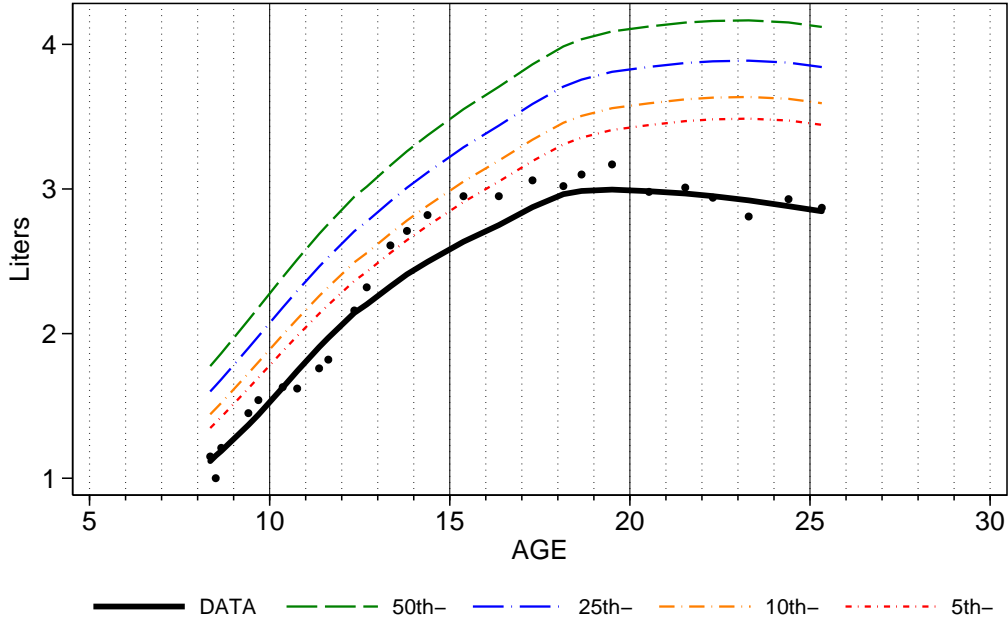

1816

**PATTERN OF GROWTH/DECLINE (Check One)**

- ( 1 ) Normal Growth
- ( 2 ) Normal Growth, Early Decline
- ( 3 ) Reduced Growth
- ( 4 ) Reduced Growth, Early Decline
- ( 9 ) Undetermined Pattern
- ( 8 ) Undetermined - not enough data

Maximum lung growth attained: ( 1 ) Yes ( 0 ) No

Plateau started: ( 2 ) No plateau ( 1 ) Yes ( 0 ) No

Decline started: ( 1 ) Yes ( 0 ) No

AGE AT each of the following periods (use '99' if N/A):

Maximum Lung Growth: \_\_\_\_ . \_\_\_\_

Start of Plateau: \_\_\_\_ . \_\_\_\_

Start of Decline: \_\_\_\_ . \_\_\_\_

### Pre-BD FEV1 Data and Percentiles: 1821

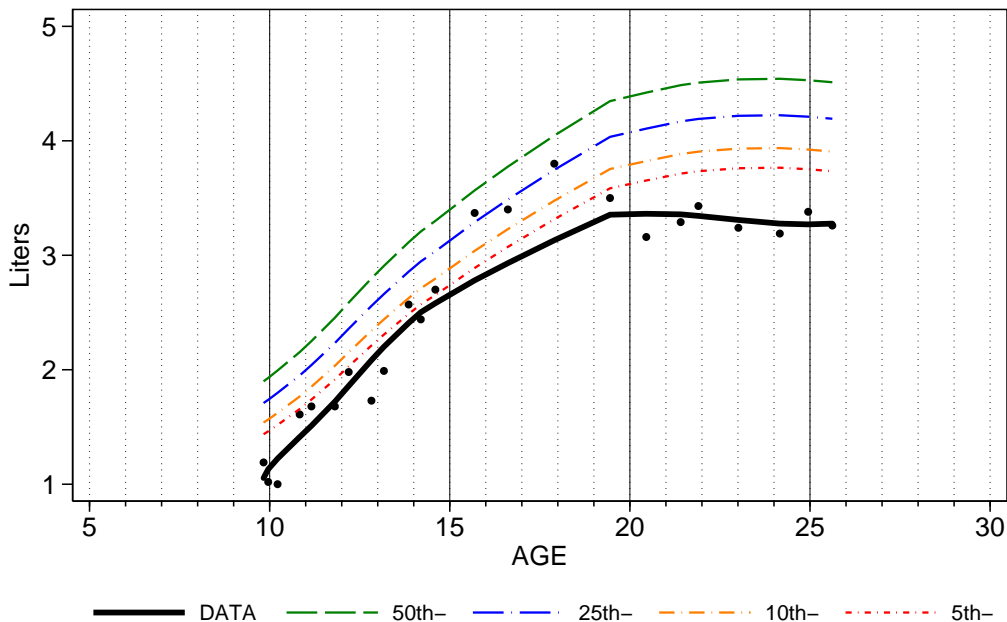

1821

**PATTERN OF GROWTH/DECLINE (Check One)**

- ( 1 ) Normal Growth
- ( 2 ) Normal Growth, Early Decline
- ( 3 ) Reduced Growth
- ( 4 ) Reduced Growth, Early Decline
- ( 9 ) Undetermined Pattern
- ( 8 ) Undetermined - not enough data

Maximum lung growth attained: ( 1 ) Yes ( 0 ) No

Plateau started: ( 2 ) No plateau ( 1 ) Yes ( 0 ) No

Decline started: ( 1 ) Yes ( 0 ) No

AGE AT each of the following periods (use '99' if N/A):

Maximum Lung Growth: \_\_\_\_ . \_\_\_\_

Start of Plateau: \_\_\_\_ . \_\_\_\_

Start of Decline: \_\_\_\_ . \_\_\_\_

### Pre-BD FEV1 Data and Percentiles: 1823

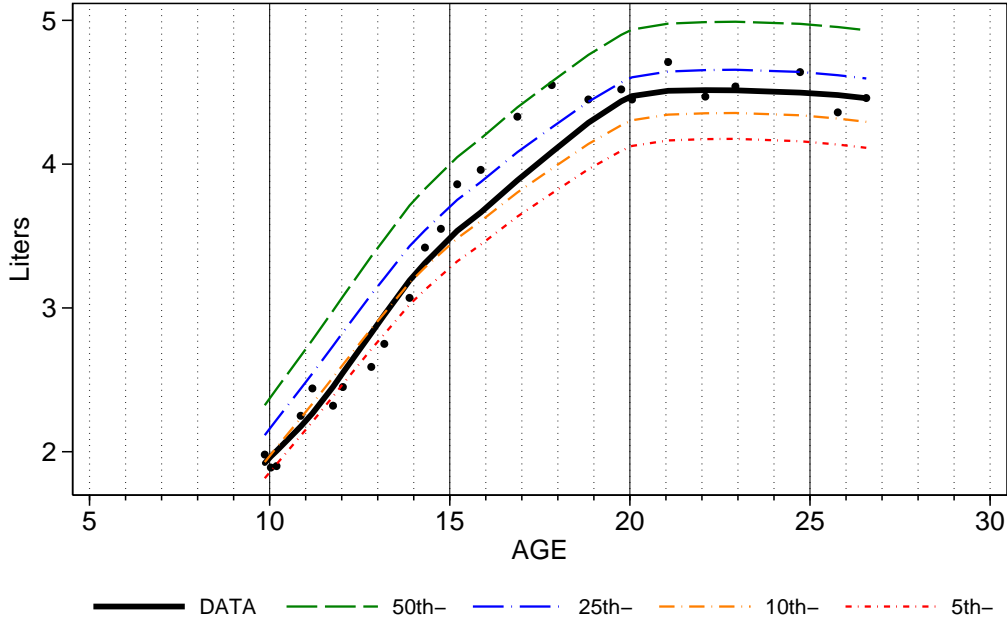

1823

**PATTERN OF GROWTH/DECLINE (Check One)**

- ( 1) Normal Growth
- ( 2) Normal Growth, Early Decline
- ( 3) Reduced Growth
- ( 4) Reduced Growth, Early Decline
- ( 9) Undetermined Pattern
- ( 8) Undetermined - not enough data

Maximum lung growth attained: ( 1) Yes ( 0) No

Plateau started: ( 2) No plateau ( 1) Yes ( 0) No

Decline started: ( 1) Yes ( 0) No

AGE AT each of the following periods (use '99' if N/A):

Maximum Lung Growth: \_\_\_\_ . \_\_\_\_

Start of Plateau: \_\_\_\_ . \_\_\_\_

Start of Decline: \_\_\_\_ . \_\_\_\_

### Pre-BD FEV1 Data and Percentiles: 1825

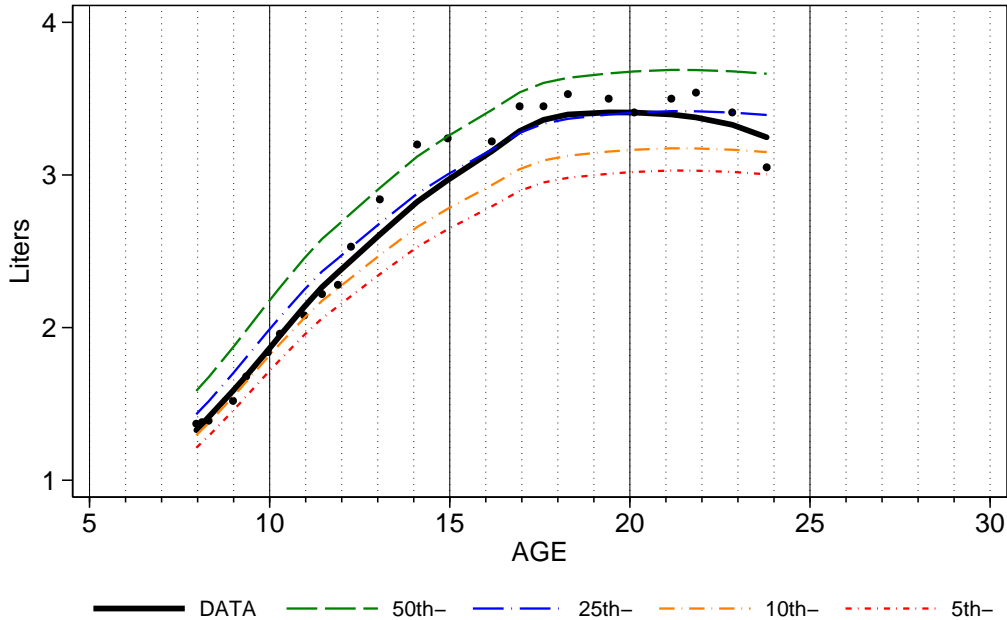

1825

**PATTERN OF GROWTH/DECLINE (Check One)**

- ( 1) Normal Growth
- ( 2) Normal Growth, Early Decline
- ( 3) Reduced Growth
- ( 4) Reduced Growth, Early Decline
- ( 9) Undetermined Pattern
- ( 8) Undetermined - not enough data

Maximum lung growth attained: ( 1) Yes ( 0) No

Plateau started: ( 2) No plateau ( 1) Yes ( 0) No

Decline started: ( 1) Yes ( 0) No

AGE AT each of the following periods (use '99' if N/A):

Maximum Lung Growth: \_\_\_\_ . \_\_\_\_

Start of Plateau: \_\_\_\_ . \_\_\_\_

Start of Decline: \_\_\_\_ . \_\_\_\_

### Pre-BD FEV1 Data and Percentiles: 1831

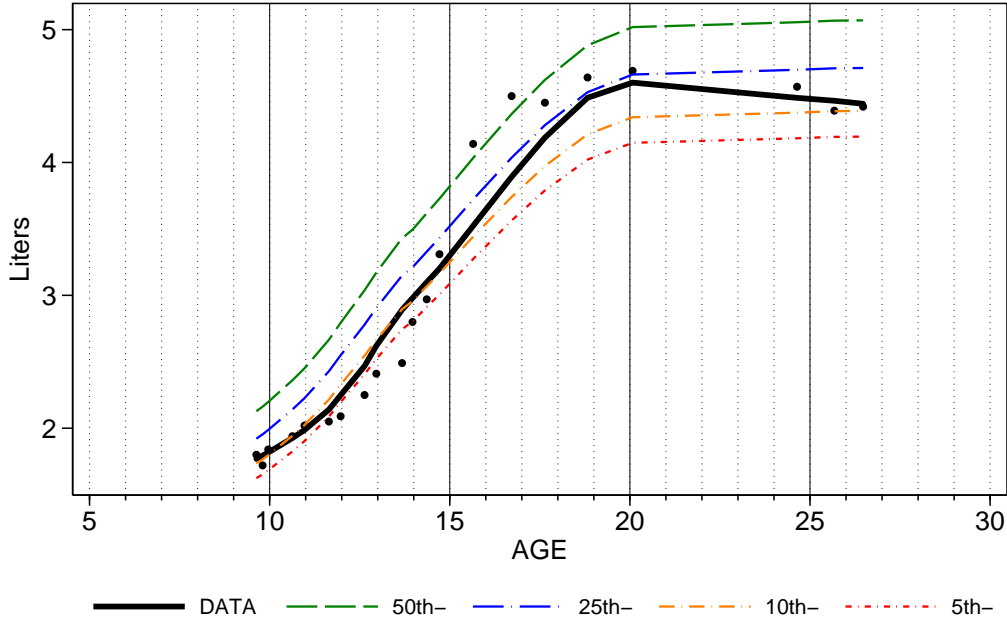

1831

**PATTERN OF GROWTH/DECLINE (Check One)**

- ( 1) Normal Growth
- ( 2) Normal Growth, Early Decline
- ( 3) Reduced Growth
- ( 4) Reduced Growth, Early Decline
- ( 9) Undetermined Pattern
- ( 8) Undetermined - not enough data

Maximum lung growth attained: ( 1) Yes ( 0) No

Plateau started: ( 2) No plateau ( 1) Yes ( 0) No

Decline started: ( 1) Yes ( 0) No

AGE AT each of the following periods (use '99' if N/A):

Maximum Lung Growth: \_\_\_\_ . \_\_\_\_

Start of Plateau: \_\_\_\_ . \_\_\_\_

Start of Decline: \_\_\_\_ . \_\_\_\_

### Pre-BD FEV1 Data and Percentiles: 1833

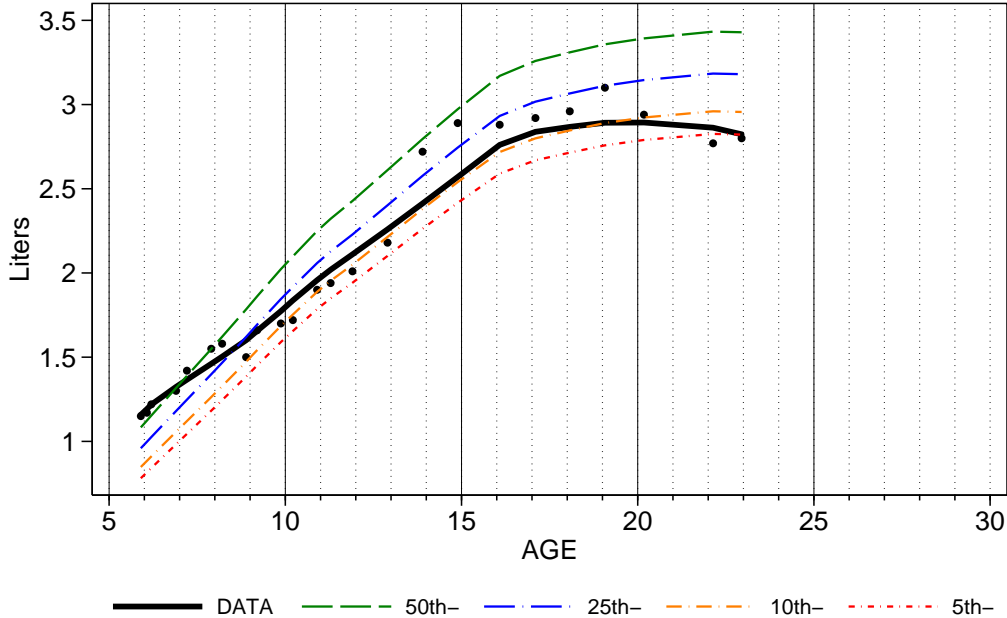

1833

**PATTERN OF GROWTH/DECLINE (Check One)**

- ( 1 ) Normal Growth
- ( 2 ) Normal Growth, Early Decline
- ( 3 ) Reduced Growth
- ( 4 ) Reduced Growth, Early Decline
- ( 9 ) Undetermined Pattern
- ( 8 ) Undetermined - not enough data

Maximum lung growth attained: ( 1 ) Yes ( 0 ) No

Plateau started: ( 2 ) No plateau ( 1 ) Yes ( 0 ) No

Decline started: ( 1 ) Yes ( 0 ) No

AGE AT each of the following periods (use '99' if N/A):

Maximum Lung Growth: \_\_\_\_ . \_\_\_\_

Start of Plateau: \_\_\_\_ . \_\_\_\_

Start of Decline: \_\_\_\_ . \_\_\_\_

### Pre-BD FEV1 Data and Percentiles: 1838

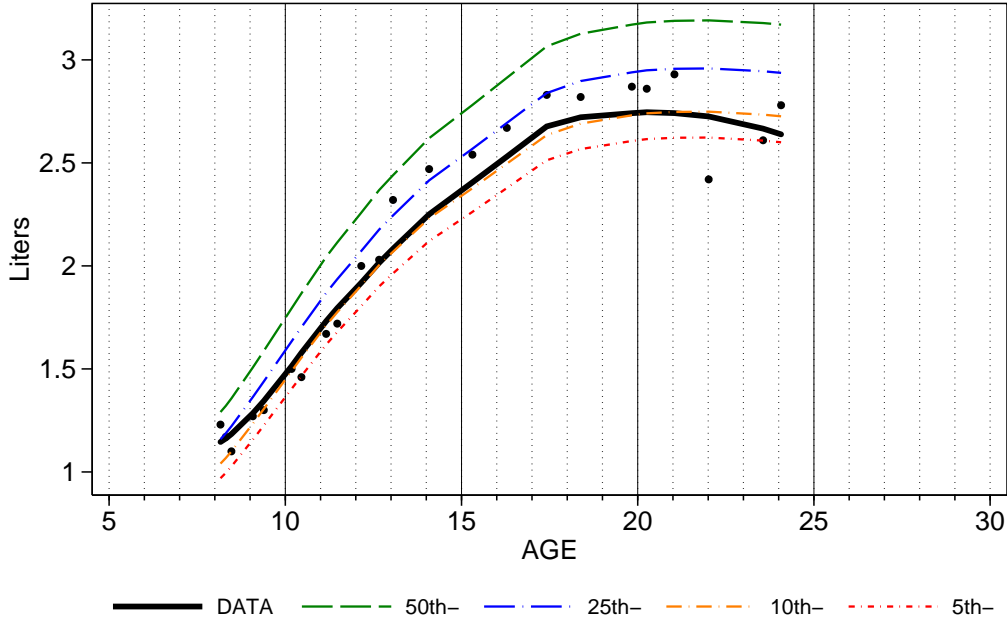

1838

**PATTERN OF GROWTH/DECLINE (Check One)**

- ( 1 ) Normal Growth
- ( 2 ) Normal Growth, Early Decline
- ( 3 ) Reduced Growth
- ( 4 ) Reduced Growth, Early Decline
- ( 9 ) Undetermined Pattern
- ( 8 ) Undetermined - not enough data

Maximum lung growth attained: ( 1 ) Yes ( 0 ) No

Plateau started: ( 2 ) No plateau ( 1 ) Yes ( 0 ) No

Decline started: ( 1 ) Yes ( 0 ) No

AGE AT each of the following periods (use '99' if N/A):

Maximum Lung Growth: \_\_\_\_ . \_\_\_\_

Start of Plateau: \_\_\_\_ . \_\_\_\_

Start of Decline: \_\_\_\_ . \_\_\_\_

### Pre-BD FEV1 Data and Percentiles: 1839

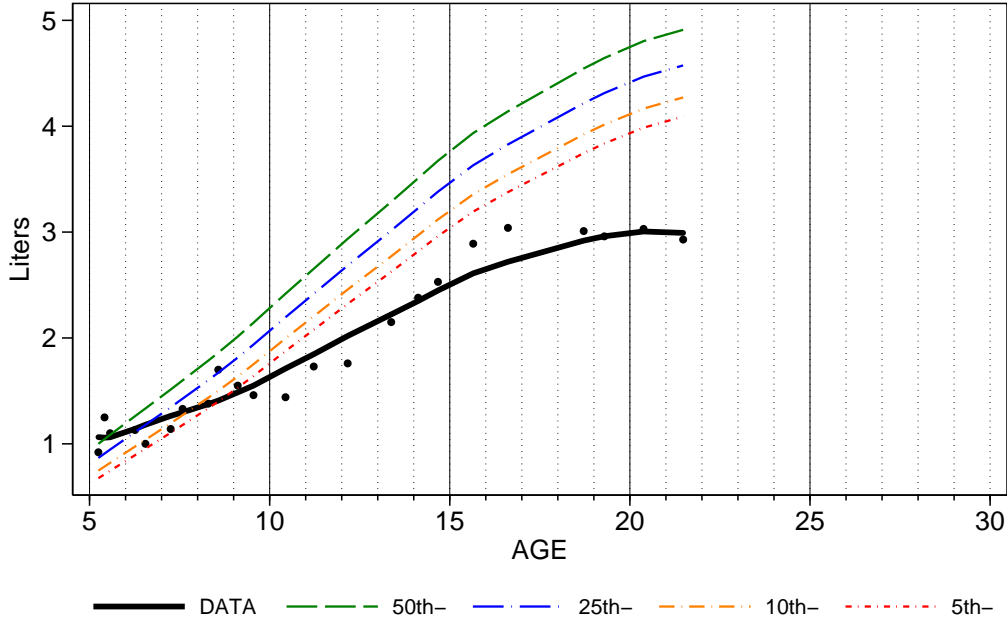

1839

**PATTERN OF GROWTH/DECLINE (Check One)**

- ( 1) Normal Growth
- ( 2) Normal Growth, Early Decline
- ( 3) Reduced Growth
- ( 4) Reduced Growth, Early Decline
- ( 9) Undetermined Pattern
- ( 8) Undetermined - not enough data

Maximum lung growth attained: ( 1) Yes ( 0) No

Plateau started: ( 2) No plateau ( 1) Yes ( 0) No

Decline started: ( 1) Yes ( 0) No

AGE AT each of the following periods (use '99' if N/A):

Maximum Lung Growth: \_\_\_\_ . \_\_\_\_

Start of Plateau: \_\_\_\_ . \_\_\_\_

Start of Decline: \_\_\_\_ . \_\_\_\_



### Pre-BD FEV1 Data and Percentiles: 1849

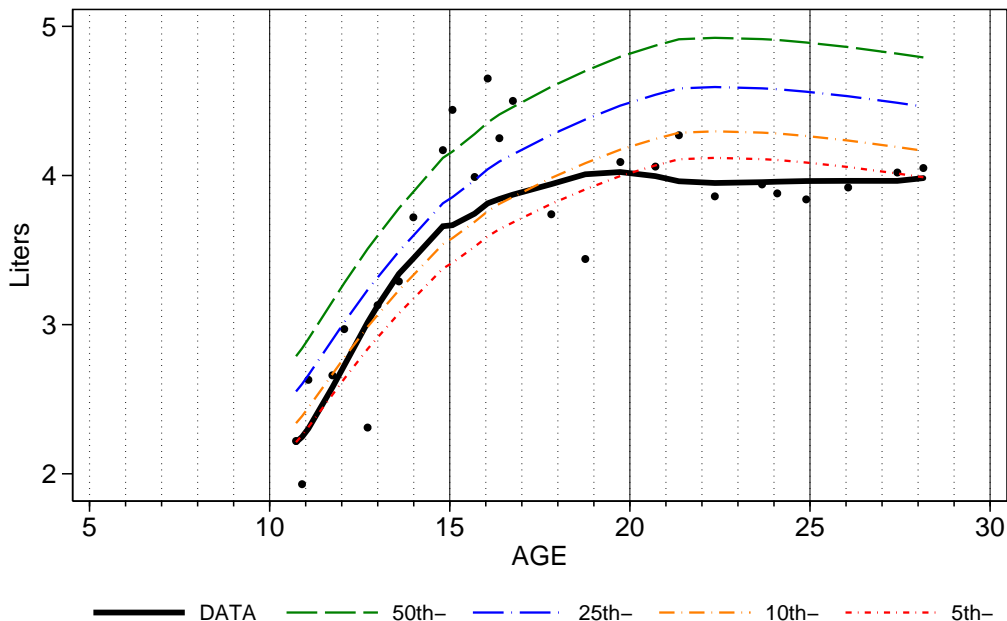

1849

**PATTERN OF GROWTH/DECLINE (Check One)**

- ( 1 ) Normal Growth
- ( 2 ) Normal Growth, Early Decline
- ( 3 ) Reduced Growth
- ( 4 ) Reduced Growth, Early Decline
- ( 9 ) Undetermined Pattern
- ( 8 ) Undetermined - not enough data

Maximum lung growth attained: ( 1 ) Yes ( 0 ) No

Plateau started: ( 2 ) No plateau ( 1 ) Yes ( 0 ) No

Decline started: ( 1 ) Yes ( 0 ) No

AGE AT each of the following periods (use '99' if N/A):

Maximum Lung Growth: \_\_\_\_ . \_\_\_\_

Start of Plateau: \_\_\_\_ . \_\_\_\_

Start of Decline: \_\_\_\_ . \_\_\_\_

### Pre-BD FEV1 Data and Percentiles: 1851

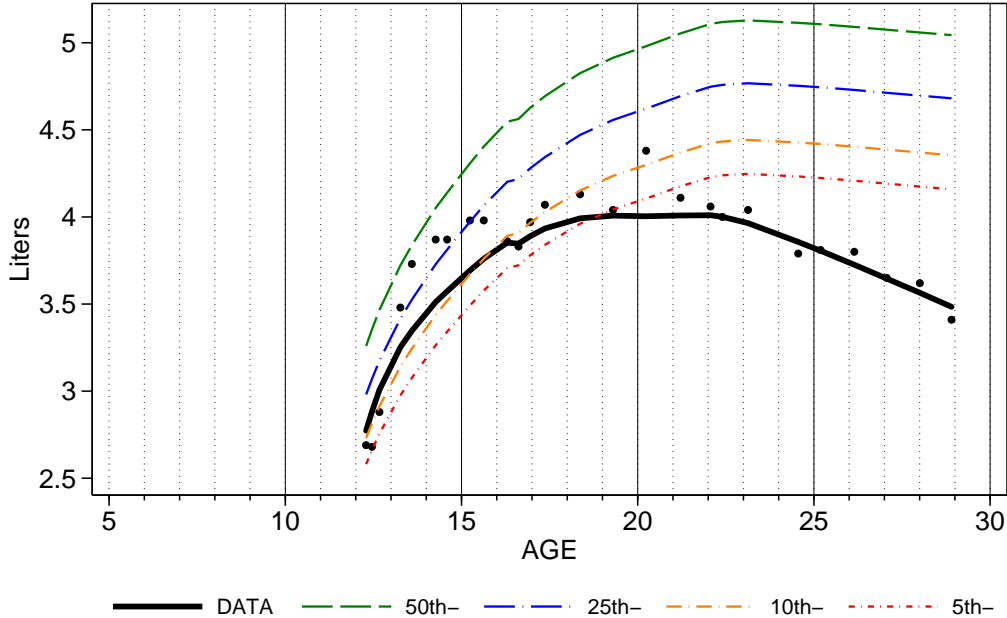

1851

**PATTERN OF GROWTH/DECLINE (Check One)**

- ( 1) Normal Growth
- ( 2) Normal Growth, Early Decline
- ( 3) Reduced Growth
- ( 4) Reduced Growth, Early Decline
- ( 9) Undetermined Pattern
- ( 8) Undetermined - not enough data

Maximum lung growth attained: ( 1) Yes ( 0) No

Plateau started: ( 2) No plateau ( 1) Yes ( 0) No

Decline started: ( 1) Yes ( 0) No

AGE AT each of the following periods (use '99' if N/A):

Maximum Lung Growth: \_\_\_\_ . \_\_\_\_

Start of Plateau: \_\_\_\_ . \_\_\_\_

Start of Decline: \_\_\_\_ . \_\_\_\_

### Pre-BD FEV1 Data and Percentiles: 1855

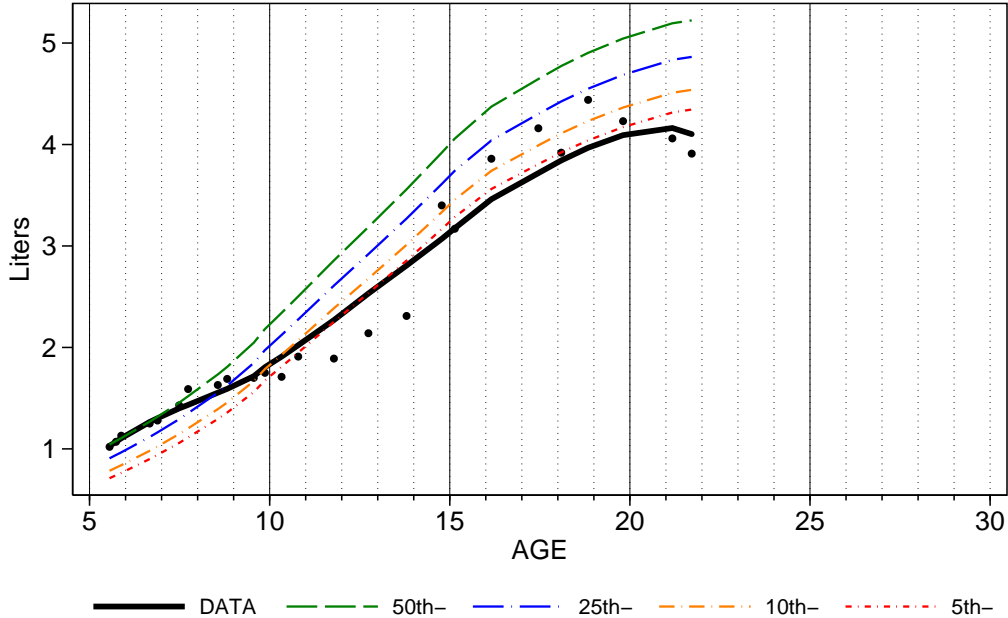

1855

**PATTERN OF GROWTH/DECLINE (Check One)**

- ( 1) Normal Growth
- ( 2) Normal Growth, Early Decline
- ( 3) Reduced Growth
- ( 4) Reduced Growth, Early Decline
- ( 9) Undetermined Pattern
- ( 8) Undetermined - not enough data

Maximum lung growth attained: ( 1) Yes ( 0) No

Plateau started: ( 2) No plateau ( 1) Yes ( 0) No

Decline started: ( 1) Yes ( 0) No

AGE AT each of the following periods (use '99' if N/A):

Maximum Lung Growth: \_\_\_\_ . \_\_\_\_

Start of Plateau: \_\_\_\_ . \_\_\_\_

Start of Decline: \_\_\_\_ . \_\_\_\_

### Pre-BD FEV1 Data and Percentiles: 1860

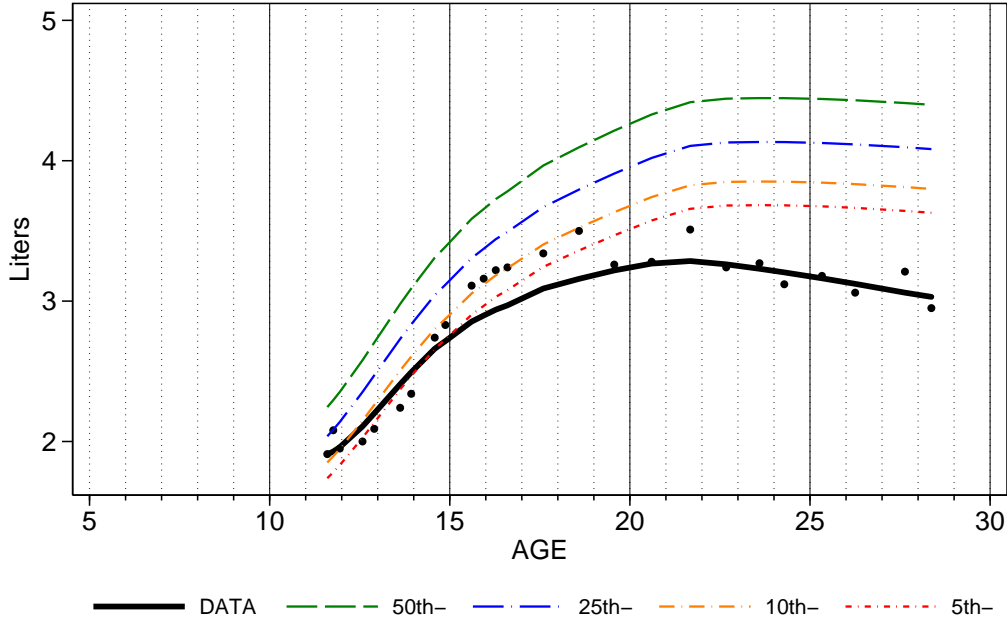

1860

**PATTERN OF GROWTH/DECLINE (Check One)**

- ( 1) Normal Growth
- ( 2) Normal Growth, Early Decline
- ( 3) Reduced Growth
- ( 4) Reduced Growth, Early Decline
- ( 9) Undetermined Pattern
- ( 8) Undetermined - not enough data

Maximum lung growth attained: ( 1) Yes ( 0) No

Plateau started: ( 2) No plateau ( 1) Yes ( 0) No

Decline started: ( 1) Yes ( 0) No

AGE AT each of the following periods (use '99' if N/A):

Maximum Lung Growth: \_\_\_\_ . \_\_\_\_

Start of Plateau: \_\_\_\_ . \_\_\_\_

Start of Decline: \_\_\_\_ . \_\_\_\_

### Pre-BD FEV1 Data and Percentiles: 1864

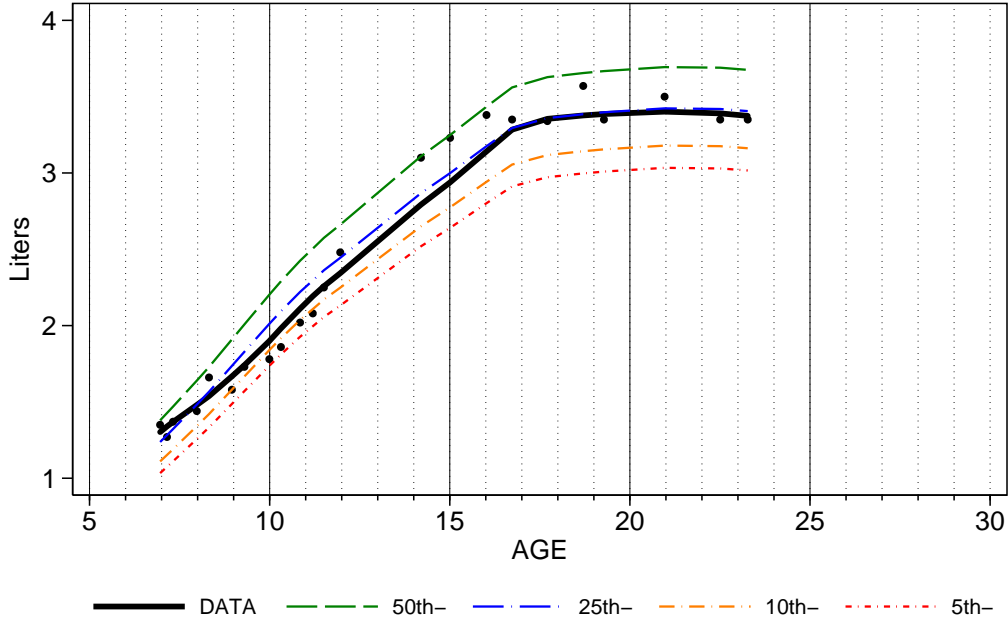

1864

**PATTERN OF GROWTH/DECLINE (Check One)**

- ( 1 ) Normal Growth
- ( 2 ) Normal Growth, Early Decline
- ( 3 ) Reduced Growth
- ( 4 ) Reduced Growth, Early Decline
- ( 9 ) Undetermined Pattern
- ( 8 ) Undetermined - not enough data

Maximum lung growth attained: ( 1 ) Yes ( 0 ) No

Plateau started: ( 2 ) No plateau ( 1 ) Yes ( 0 ) No

Decline started: ( 1 ) Yes ( 0 ) No

AGE AT each of the following periods (use '99' if N/A):

Maximum Lung Growth: \_\_\_\_ . \_\_\_\_

Start of Plateau: \_\_\_\_ . \_\_\_\_

Start of Decline: \_\_\_\_ . \_\_\_\_

### Pre-BD FEV1 Data and Percentiles: 1866

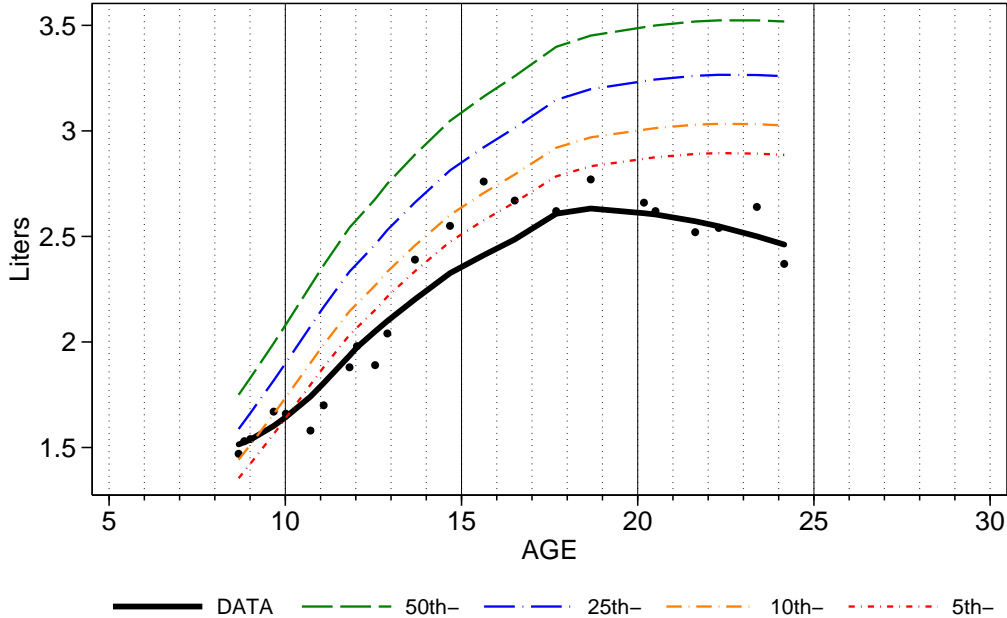

1866

**PATTERN OF GROWTH/DECLINE (Check One)**

- ( 1) Normal Growth
- ( 2) Normal Growth, Early Decline
- ( 3) Reduced Growth
- ( 4) Reduced Growth, Early Decline
- ( 9) Undetermined Pattern
- ( 8) Undetermined - not enough data

Maximum lung growth attained: ( 1) Yes ( 0) No

Plateau started: ( 2) No plateau ( 1) Yes ( 0) No

Decline started: ( 1) Yes ( 0) No

AGE AT each of the following periods (use '99' if N/A):

Maximum Lung Growth: \_\_\_\_ . \_\_\_\_

Start of Plateau: \_\_\_\_ . \_\_\_\_

Start of Decline: \_\_\_\_ . \_\_\_\_

### Pre-BD FEV1 Data and Percentiles: 1868

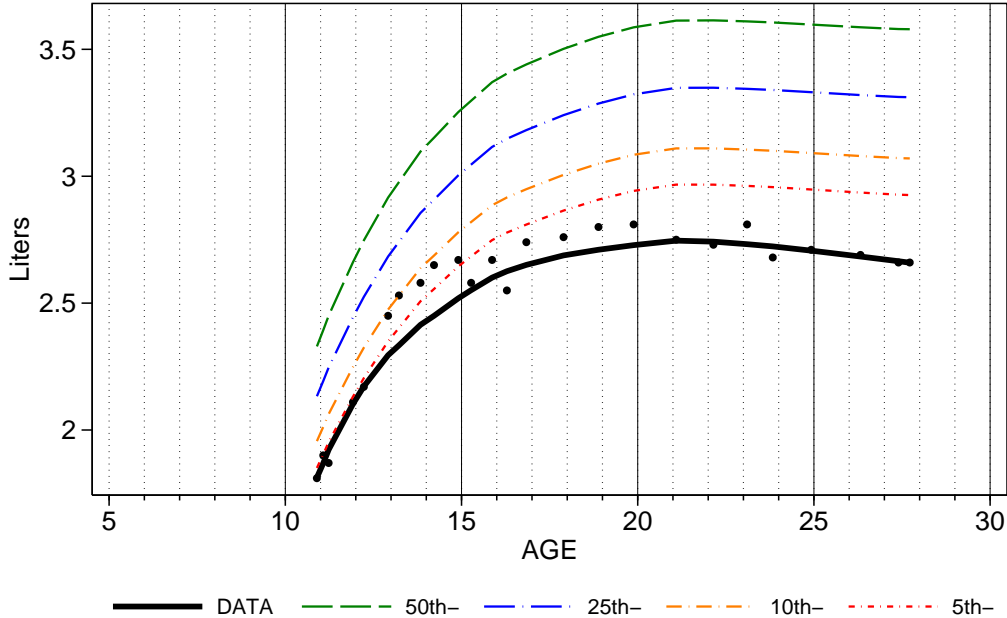

1868

**PATTERN OF GROWTH/DECLINE (Check One)**

- ( 1) Normal Growth
- ( 2) Normal Growth, Early Decline
- ( 3) Reduced Growth
- ( 4) Reduced Growth, Early Decline
- ( 9) Undetermined Pattern
- ( 8) Undetermined - not enough data

Maximum lung growth attained: ( 1) Yes ( 0) No

Plateau started: ( 2) No plateau ( 1) Yes ( 0) No

Decline started: ( 1) Yes ( 0) No

AGE AT each of the following periods (use '99' if N/A):

Maximum Lung Growth: \_\_\_\_ . \_\_\_\_

Start of Plateau: \_\_\_\_ . \_\_\_\_

Start of Decline: \_\_\_\_ . \_\_\_\_

### Pre-BD FEV1 Data and Percentiles: 1889

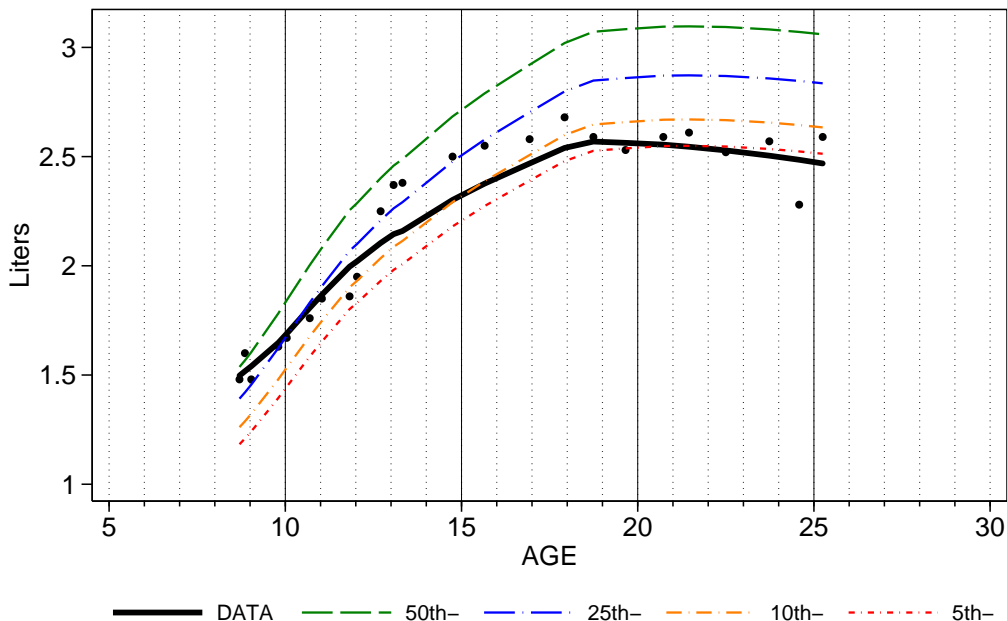

1889

**PATTERN OF GROWTH/DECLINE (Check One)**

- ( 1 ) Normal Growth
- ( 2 ) Normal Growth, Early Decline
- ( 3 ) Reduced Growth
- ( 4 ) Reduced Growth, Early Decline
- ( 9 ) Undetermined Pattern
- ( 8 ) Undetermined - not enough data

Maximum lung growth attained: ( 1 ) Yes ( 0 ) No

Plateau started: ( 2 ) No plateau ( 1 ) Yes ( 0 ) No

Decline started: ( 1 ) Yes ( 0 ) No

AGE AT each of the following periods (use '99' if N/A):

Maximum Lung Growth: \_\_\_\_ . \_\_\_\_

Start of Plateau: \_\_\_\_ . \_\_\_\_

Start of Decline: \_\_\_\_ . \_\_\_\_



### Pre-BD FEV1 Data and Percentiles: 1893

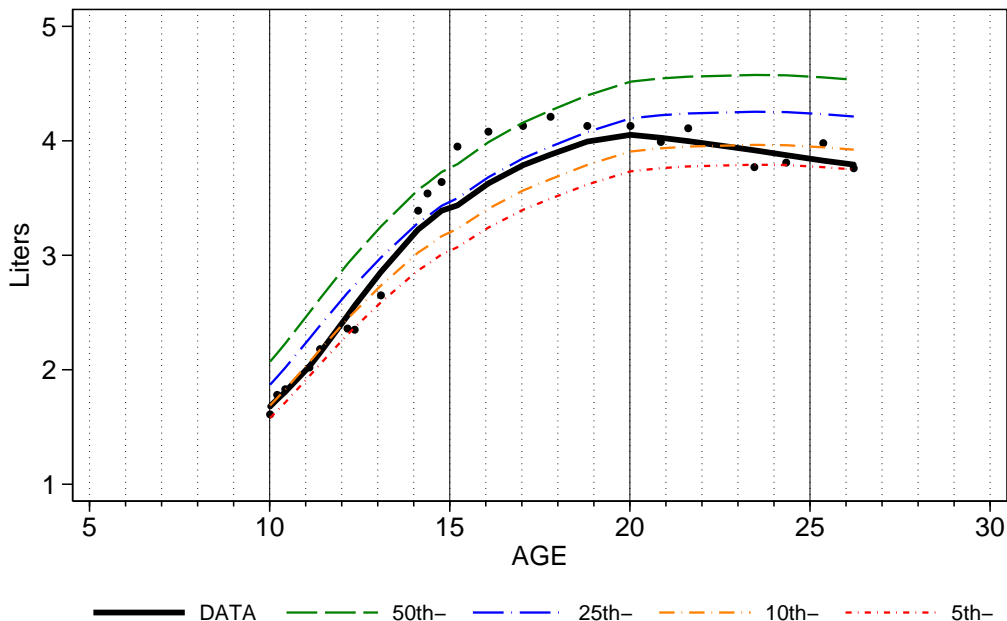

1893

**PATTERN OF GROWTH/DECLINE (Check One)**

- ( 1 ) Normal Growth
- ( 2 ) Normal Growth, Early Decline
- ( 3 ) Reduced Growth
- ( 4 ) Reduced Growth, Early Decline
- ( 9 ) Undetermined Pattern
- ( 8 ) Undetermined - not enough data

Maximum lung growth attained: ( 1 ) Yes ( 0 ) No

Plateau started: ( 2 ) No plateau ( 1 ) Yes ( 0 ) No

Decline started: ( 1 ) Yes ( 0 ) No

AGE AT each of the following periods (use '99' if N/A):

Maximum Lung Growth: \_\_\_\_ . \_\_\_\_

Start of Plateau: \_\_\_\_ . \_\_\_\_

Start of Decline: \_\_\_\_ . \_\_\_\_

### Pre-BD FEV1 Data and Percentiles: 1910

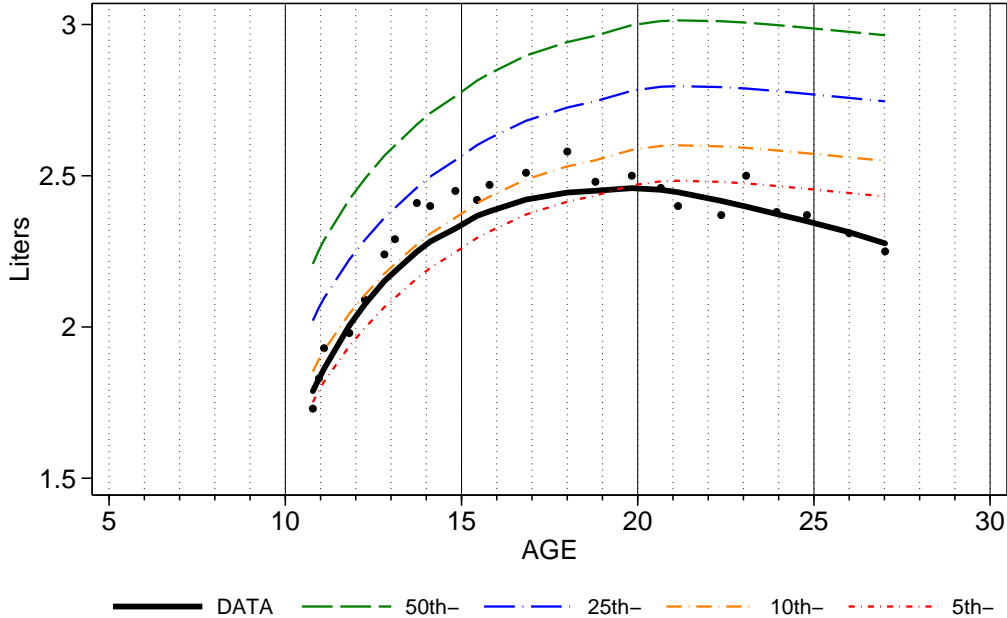

1910

**PATTERN OF GROWTH/DECLINE (Check One)**

- ( 1) Normal Growth
- ( 2) Normal Growth, Early Decline
- ( 3) Reduced Growth
- ( 4) Reduced Growth, Early Decline
- ( 9) Undetermined Pattern
- ( 8) Undetermined - not enough data

Maximum lung growth attained: ( 1) Yes ( 0) No

Plateau started: ( 2) No plateau ( 1) Yes ( 0) No

Decline started: ( 1) Yes ( 0) No

AGE AT each of the following periods (use '99' if N/A):

Maximum Lung Growth: \_\_\_\_ . \_\_\_\_

Start of Plateau: \_\_\_\_ . \_\_\_\_

Start of Decline: \_\_\_\_ . \_\_\_\_

### Pre-BD FEV1 Data and Percentiles: 1912

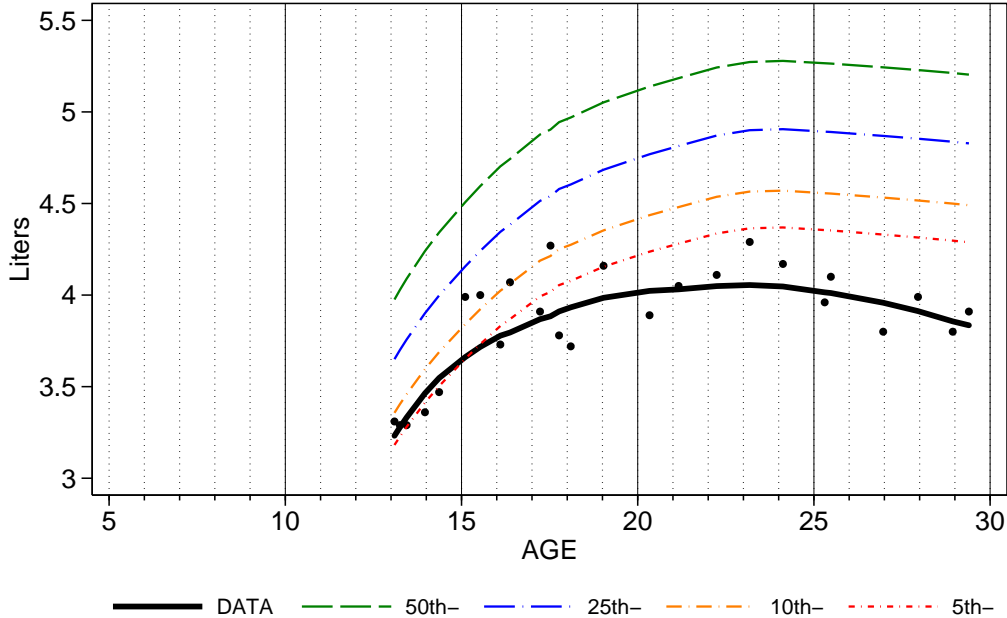

1912

**PATTERN OF GROWTH/DECLINE (Check One)**

- ( 1) Normal Growth
- ( 2) Normal Growth, Early Decline
- ( 3) Reduced Growth
- ( 4) Reduced Growth, Early Decline
- ( 9) Undetermined Pattern
- ( 8) Undetermined - not enough data

Maximum lung growth attained: ( 1) Yes ( 0) No

Plateau started: ( 2) No plateau ( 1) Yes ( 0) No

Decline started: ( 1) Yes ( 0) No

AGE AT each of the following periods (use '99' if N/A):

Maximum Lung Growth: \_\_\_\_ . \_\_\_\_

Start of Plateau: \_\_\_\_ . \_\_\_\_

Start of Decline: \_\_\_\_ . \_\_\_\_

### Pre-BD FEV1 Data and Percentiles: 1914

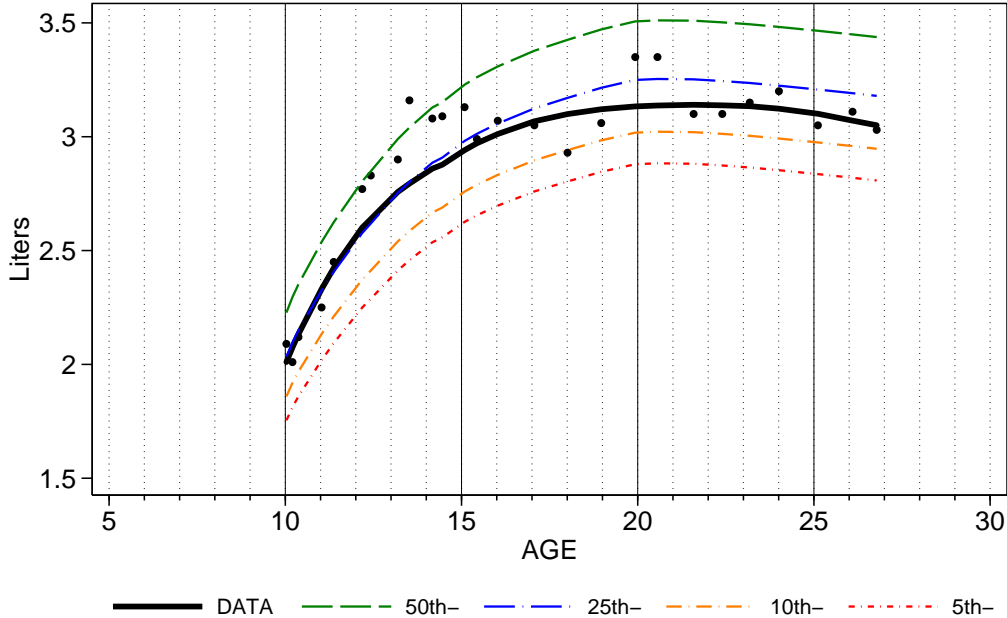

1914

**PATTERN OF GROWTH/DECLINE (Check One)**

- ( 1 ) Normal Growth
- ( 2 ) Normal Growth, Early Decline
- ( 3 ) Reduced Growth
- ( 4 ) Reduced Growth, Early Decline
- ( 9 ) Undetermined Pattern
- ( 8 ) Undetermined - not enough data

Maximum lung growth attained: ( 1 ) Yes ( 0 ) No

Plateau started: ( 2 ) No plateau ( 1 ) Yes ( 0 ) No

Decline started: ( 1 ) Yes ( 0 ) No

AGE AT each of the following periods (use '99' if N/A):

Maximum Lung Growth: \_\_\_\_ . \_\_\_\_

Start of Plateau: \_\_\_\_ . \_\_\_\_

Start of Decline: \_\_\_\_ . \_\_\_\_

### Pre-BD FEV1 Data and Percentiles: 1915

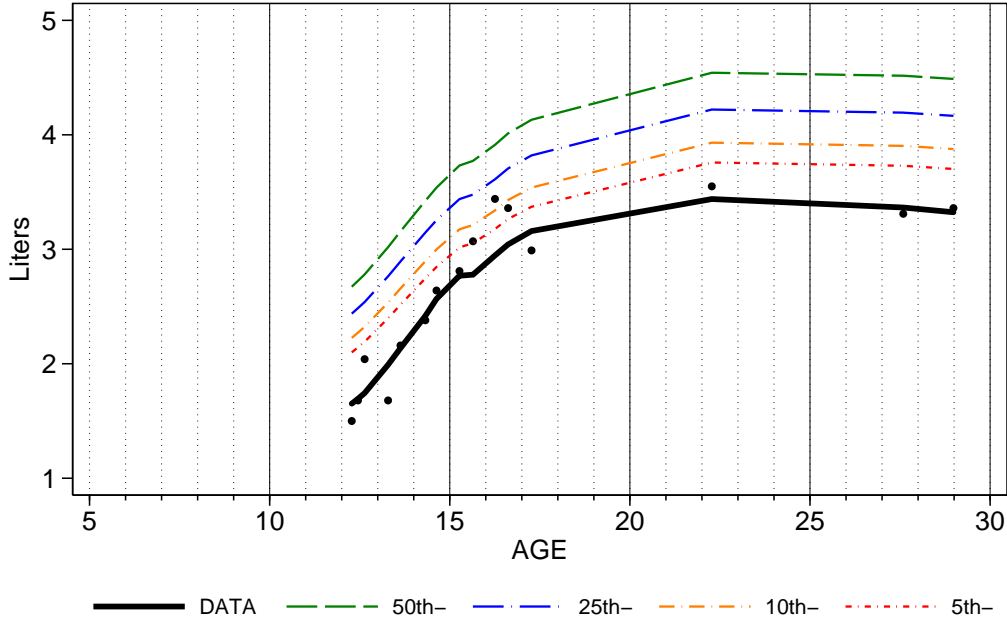

1915

**PATTERN OF GROWTH/DECLINE (Check One)**

- ( 1 ) Normal Growth
- ( 2 ) Normal Growth, Early Decline
- ( 3 ) Reduced Growth
- ( 4 ) Reduced Growth, Early Decline
- ( 9 ) Undetermined Pattern
- ( 8 ) Undetermined - not enough data

Maximum lung growth attained: ( 1 ) Yes ( 0 ) No

Plateau started: ( 2 ) No plateau ( 1 ) Yes ( 0 ) No

Decline started: ( 1 ) Yes ( 0 ) No

AGE AT each of the following periods (use '99' if N/A):

Maximum Lung Growth: \_\_\_\_ . \_\_\_\_

Start of Plateau: \_\_\_\_ . \_\_\_\_

Start of Decline: \_\_\_\_ . \_\_\_\_

### Pre-BD FEV1 Data and Percentiles: 1918

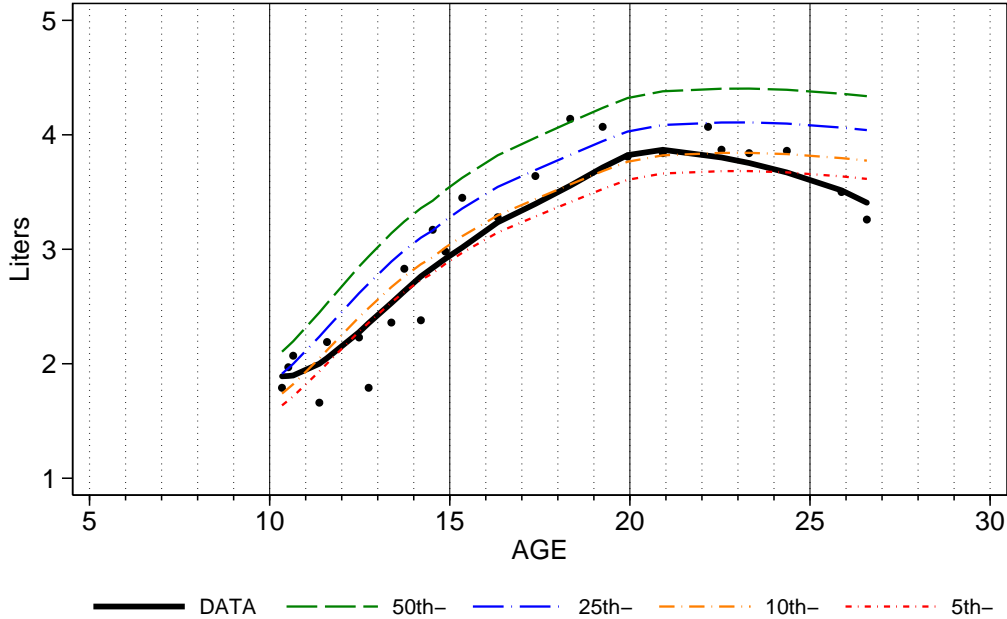

1918

**PATTERN OF GROWTH/DECLINE (Check One)**

- ( 1 ) Normal Growth
- ( 2 ) Normal Growth, Early Decline
- ( 3 ) Reduced Growth
- ( 4 ) Reduced Growth, Early Decline
- ( 9 ) Undetermined Pattern
- ( 8 ) Undetermined - not enough data

Maximum lung growth attained: ( 1 ) Yes ( 0 ) No

Plateau started: ( 2 ) No plateau ( 1 ) Yes ( 0 ) No

Decline started: ( 1 ) Yes ( 0 ) No

AGE AT each of the following periods (use '99' if N/A):

Maximum Lung Growth: \_\_\_\_ . \_\_\_\_

Start of Plateau: \_\_\_\_ . \_\_\_\_

Start of Decline: \_\_\_\_ . \_\_\_\_

### Pre-BD FEV1 Data and Percentiles: 1921

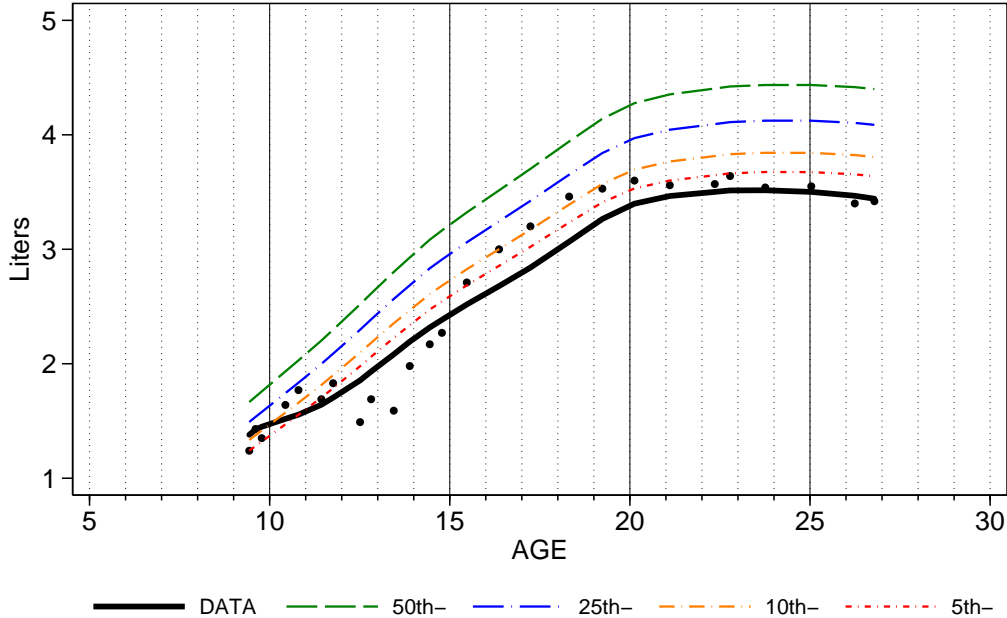

1921

**PATTERN OF GROWTH/DECLINE (Check One)**

- ( 1 ) Normal Growth
- ( 2 ) Normal Growth, Early Decline
- ( 3 ) Reduced Growth
- ( 4 ) Reduced Growth, Early Decline
- ( 9 ) Undetermined Pattern
- ( 8 ) Undetermined - not enough data

Maximum lung growth attained: ( 1 ) Yes ( 0 ) No

Plateau started: ( 2 ) No plateau ( 1 ) Yes ( 0 ) No

Decline started: ( 1 ) Yes ( 0 ) No

AGE AT each of the following periods (use '99' if N/A):

Maximum Lung Growth: \_\_\_\_ . \_\_\_\_

Start of Plateau: \_\_\_\_ . \_\_\_\_

Start of Decline: \_\_\_\_ . \_\_\_\_

### Pre-BD FEV1 Data and Percentiles: 1925

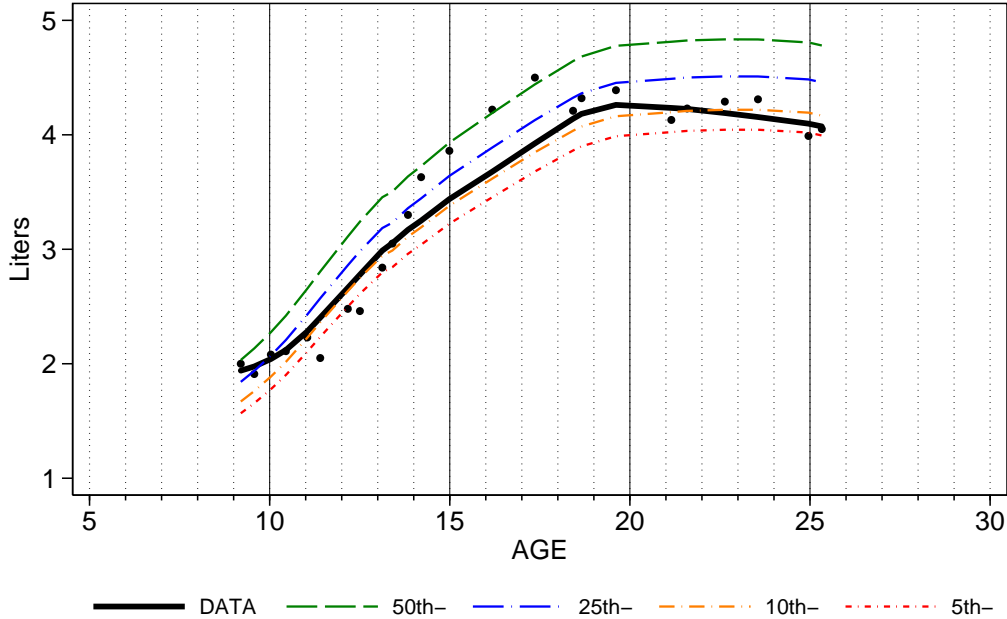

1925

**PATTERN OF GROWTH/DECLINE (Check One)**

- ( 1 ) Normal Growth
- ( 2 ) Normal Growth, Early Decline
- ( 3 ) Reduced Growth
- ( 4 ) Reduced Growth, Early Decline
- ( 9 ) Undetermined Pattern
- ( 8 ) Undetermined - not enough data

Maximum lung growth attained: ( 1 ) Yes ( 0 ) No

Plateau started: ( 2 ) No plateau ( 1 ) Yes ( 0 ) No

Decline started: ( 1 ) Yes ( 0 ) No

AGE AT each of the following periods (use '99' if N/A):

Maximum Lung Growth: \_\_\_\_ . \_\_\_\_

Start of Plateau: \_\_\_\_ . \_\_\_\_

Start of Decline: \_\_\_\_ . \_\_\_\_



### Pre-BD FEV1 Data and Percentiles: 1936

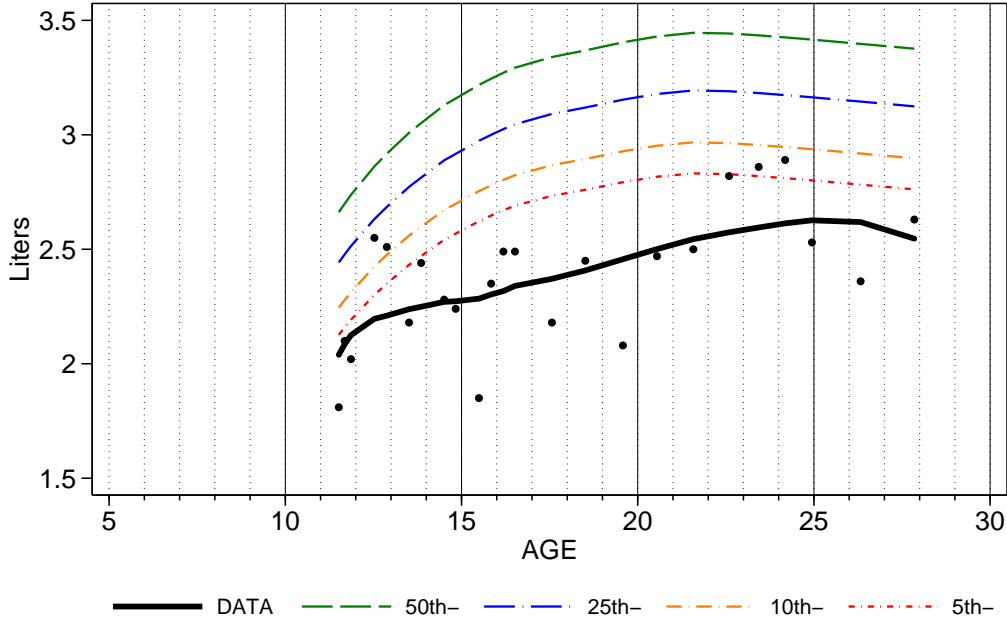

1936

**PATTERN OF GROWTH/DECLINE (Check One)**

- ( 1) Normal Growth
- ( 2) Normal Growth, Early Decline
- ( 3) Reduced Growth
- ( 4) Reduced Growth, Early Decline
- ( 9) Undetermined Pattern
- ( 8) Undetermined - not enough data

Maximum lung growth attained: ( 1) Yes ( 0) No

Plateau started: ( 2) No plateau ( 1) Yes ( 0) No

Decline started: ( 1) Yes ( 0) No

AGE AT each of the following periods (use '99' if N/A):

Maximum Lung Growth: \_\_\_\_ . \_\_\_\_

Start of Plateau: \_\_\_\_ . \_\_\_\_

Start of Decline: \_\_\_\_ . \_\_\_\_

### Pre-BD FEV1 Data and Percentiles: 1947

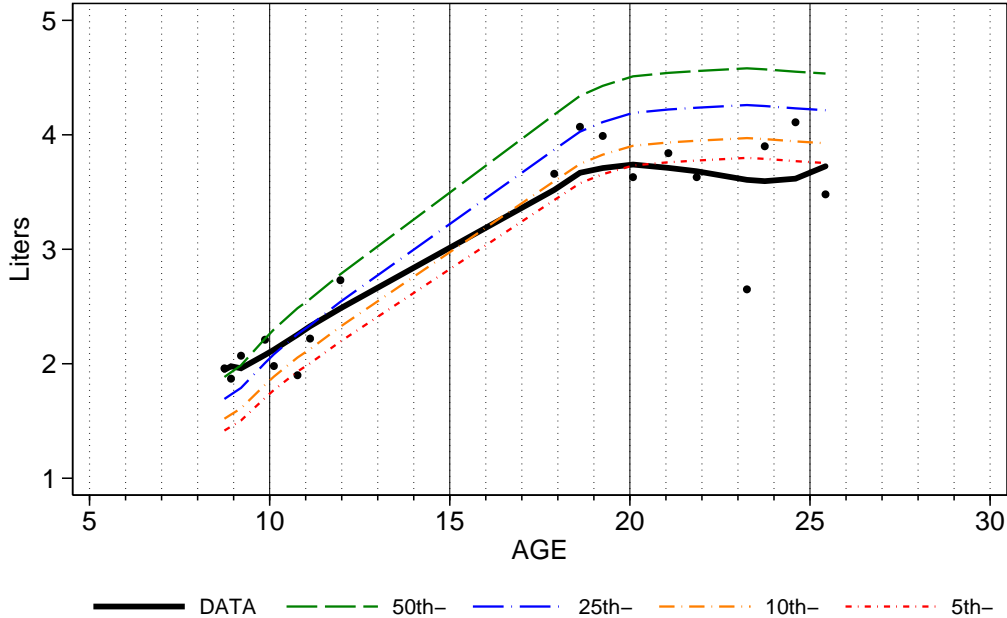

1947

**PATTERN OF GROWTH/DECLINE (Check One)**

- ( 1) Normal Growth
- ( 2) Normal Growth, Early Decline
- ( 3) Reduced Growth
- ( 4) Reduced Growth, Early Decline
- ( 9) Undetermined Pattern
- ( 8) Undetermined - not enough data

Maximum lung growth attained: ( 1) Yes ( 0) No

Plateau started: ( 2) No plateau ( 1) Yes ( 0) No

Decline started: ( 1) Yes ( 0) No

AGE AT each of the following periods (use '99' if N/A):

Maximum Lung Growth: \_\_\_\_ . \_\_\_\_

Start of Plateau: \_\_\_\_ . \_\_\_\_

Start of Decline: \_\_\_\_ . \_\_\_\_

### Pre-BD FEV1 Data and Percentiles: 1949

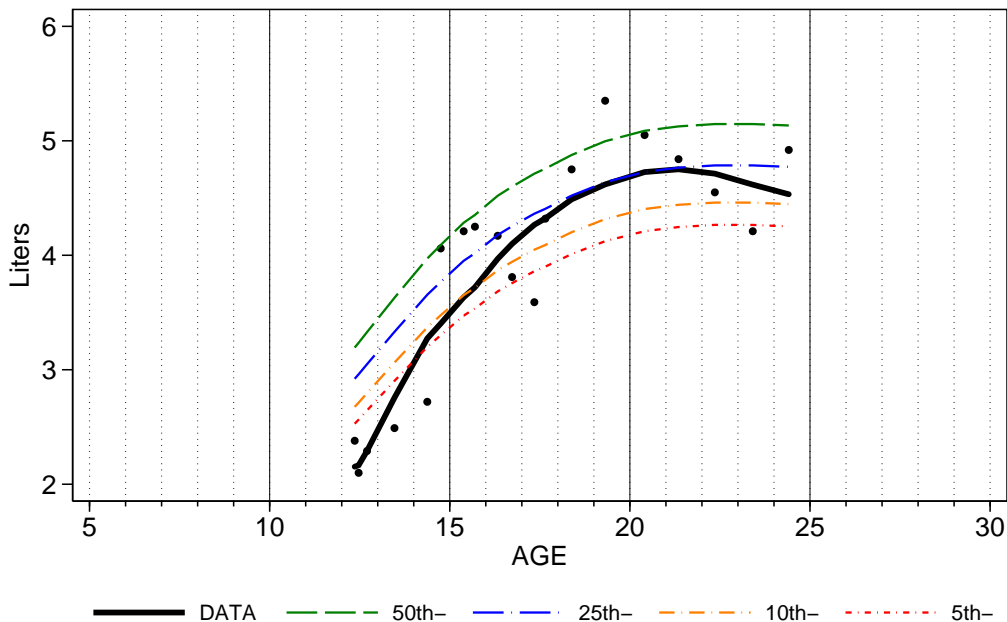

1949

**PATTERN OF GROWTH/DECLINE (Check One)**

- ( 1 ) Normal Growth
- ( 2 ) Normal Growth, Early Decline
- ( 3 ) Reduced Growth
- ( 4 ) Reduced Growth, Early Decline
- ( 9 ) Undetermined Pattern
- ( 8 ) Undetermined - not enough data

Maximum lung growth attained: ( 1 ) Yes ( 0 ) No

Plateau started: ( 2 ) No plateau ( 1 ) Yes ( 0 ) No

Decline started: ( 1 ) Yes ( 0 ) No

AGE AT each of the following periods (use '99' if N/A):

Maximum Lung Growth: \_\_\_\_ . \_\_\_\_

Start of Plateau: \_\_\_\_ . \_\_\_\_

Start of Decline: \_\_\_\_ . \_\_\_\_

### Pre-BD FEV1 Data and Percentiles: 1954

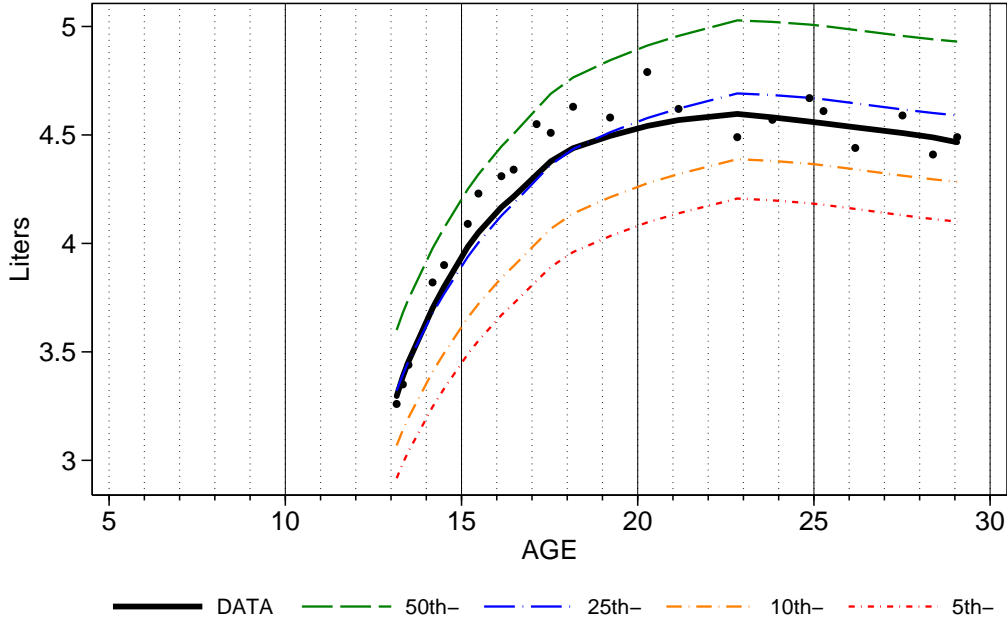

1954

**PATTERN OF GROWTH/DECLINE (Check One)**

- ( 1) Normal Growth
- ( 2) Normal Growth, Early Decline
- ( 3) Reduced Growth
- ( 4) Reduced Growth, Early Decline
- ( 9) Undetermined Pattern
- ( 8) Undetermined - not enough data

Maximum lung growth attained: ( 1) Yes ( 0) No

Plateau started: ( 2) No plateau ( 1) Yes ( 0) No

Decline started: ( 1) Yes ( 0) No

AGE AT each of the following periods (use '99' if N/A):

Maximum Lung Growth: \_\_\_\_ . \_\_\_\_

Start of Plateau: \_\_\_\_ . \_\_\_\_

Start of Decline: \_\_\_\_ . \_\_\_\_

### Pre-BD FEV1 Data and Percentiles: 1955

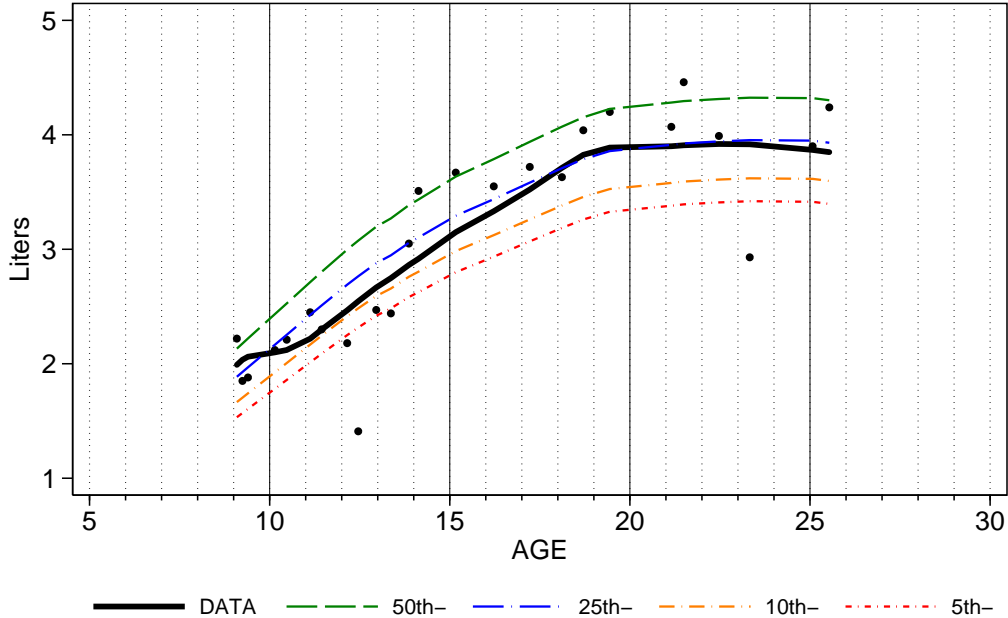

1955

**PATTERN OF GROWTH/DECLINE (Check One)**

- ( 1 ) Normal Growth
- ( 2 ) Normal Growth, Early Decline
- ( 3 ) Reduced Growth
- ( 4 ) Reduced Growth, Early Decline
- ( 9 ) Undetermined Pattern
- ( 8 ) Undetermined - not enough data

Maximum lung growth attained: ( 1 ) Yes ( 0 ) No

Plateau started: ( 2 ) No plateau ( 1 ) Yes ( 0 ) No

Decline started: ( 1 ) Yes ( 0 ) No

AGE AT each of the following periods (use '99' if N/A):

Maximum Lung Growth: \_\_\_\_ . \_\_\_\_

Start of Plateau: \_\_\_\_ . \_\_\_\_

Start of Decline: \_\_\_\_ . \_\_\_\_

### Pre-BD FEV1 Data and Percentiles: 1957

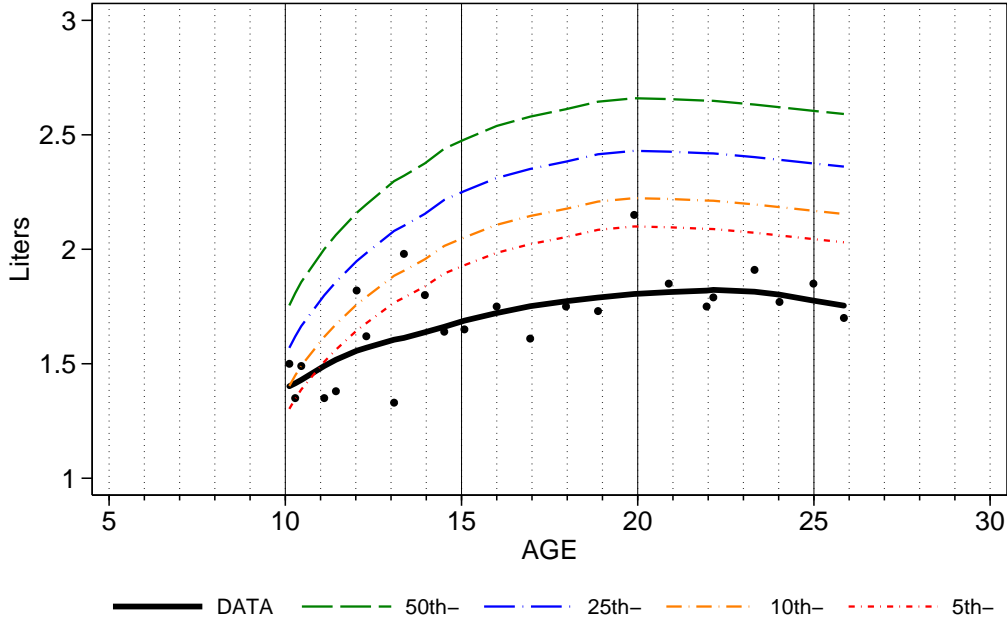

1957

**PATTERN OF GROWTH/DECLINE (Check One)**

- ( 1) Normal Growth
- ( 2) Normal Growth, Early Decline
- ( 3) Reduced Growth
- ( 4) Reduced Growth, Early Decline
- ( 9) Undetermined Pattern
- ( 8) Undetermined - not enough data

Maximum lung growth attained: ( 1) Yes ( 0) No

Plateau started: ( 2) No plateau ( 1) Yes ( 0) No

Decline started: ( 1) Yes ( 0) No

AGE AT each of the following periods (use '99' if N/A):

Maximum Lung Growth: \_\_\_\_ . \_\_\_\_

Start of Plateau: \_\_\_\_ . \_\_\_\_

Start of Decline: \_\_\_\_ . \_\_\_\_

### Pre-BD FEV1 Data and Percentiles: 1960

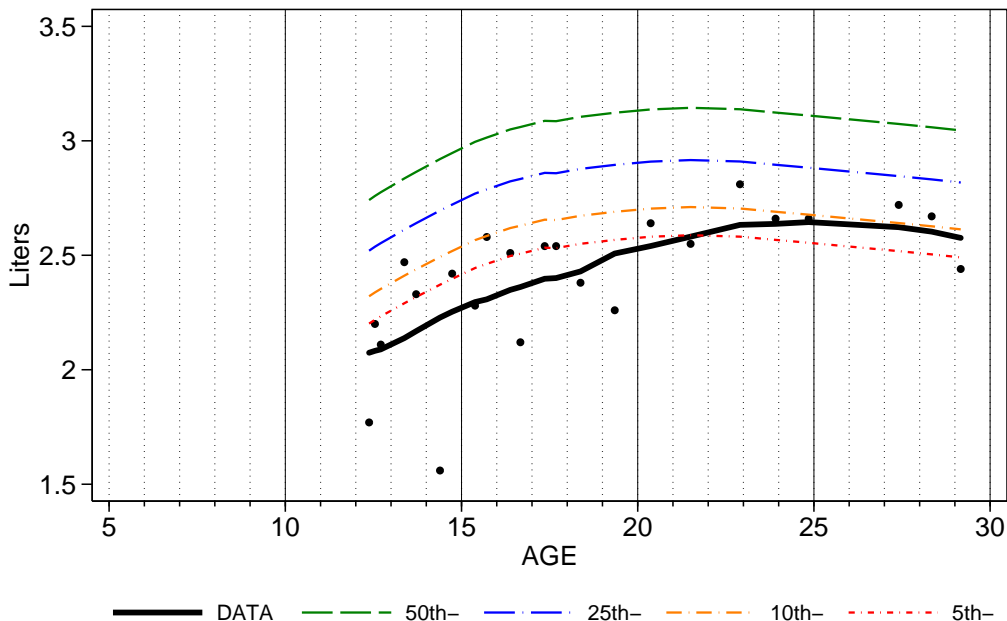

1960

**PATTERN OF GROWTH/DECLINE (Check One)**

- ( 1) Normal Growth
- ( 2) Normal Growth, Early Decline
- ( 3) Reduced Growth
- ( 4) Reduced Growth, Early Decline
- ( 9) Undetermined Pattern
- ( 8) Undetermined - not enough data

Maximum lung growth attained: ( 1) Yes ( 0) No

Plateau started: ( 2) No plateau ( 1) Yes ( 0) No

Decline started: ( 1) Yes ( 0) No

AGE AT each of the following periods (use '99' if N/A):

Maximum Lung Growth: \_\_\_\_ . \_\_\_\_

Start of Plateau: \_\_\_\_ . \_\_\_\_

Start of Decline: \_\_\_\_ . \_\_\_\_

### Pre-BD FEV1 Data and Percentiles: 1961

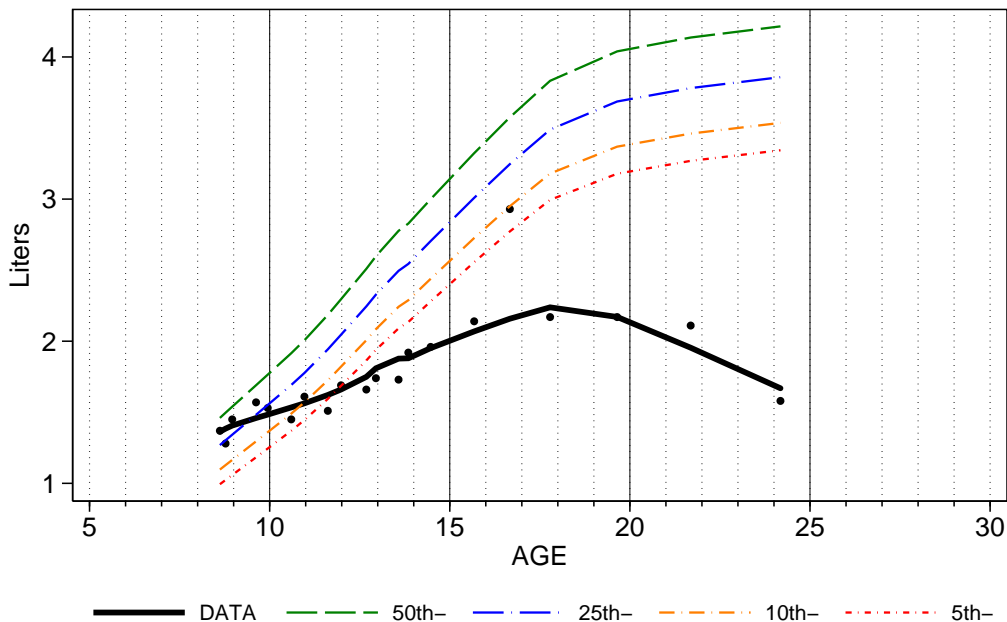

1961

**PATTERN OF GROWTH/DECLINE (Check One)**

- ( 1 ) Normal Growth
- ( 2 ) Normal Growth, Early Decline
- ( 3 ) Reduced Growth
- ( 4 ) Reduced Growth, Early Decline
- ( 9 ) Undetermined Pattern
- ( 8 ) Undetermined - not enough data

Maximum lung growth attained: ( 1 ) Yes ( 0 ) No

Plateau started: ( 2 ) No plateau ( 1 ) Yes ( 0 ) No

Decline started: ( 1 ) Yes ( 0 ) No

AGE AT each of the following periods (use '99' if N/A):

Maximum Lung Growth: \_\_\_\_ . \_\_\_\_

Start of Plateau: \_\_\_\_ . \_\_\_\_

Start of Decline: \_\_\_\_ . \_\_\_\_



### Pre-BD FEV1 Data and Percentiles: 1970

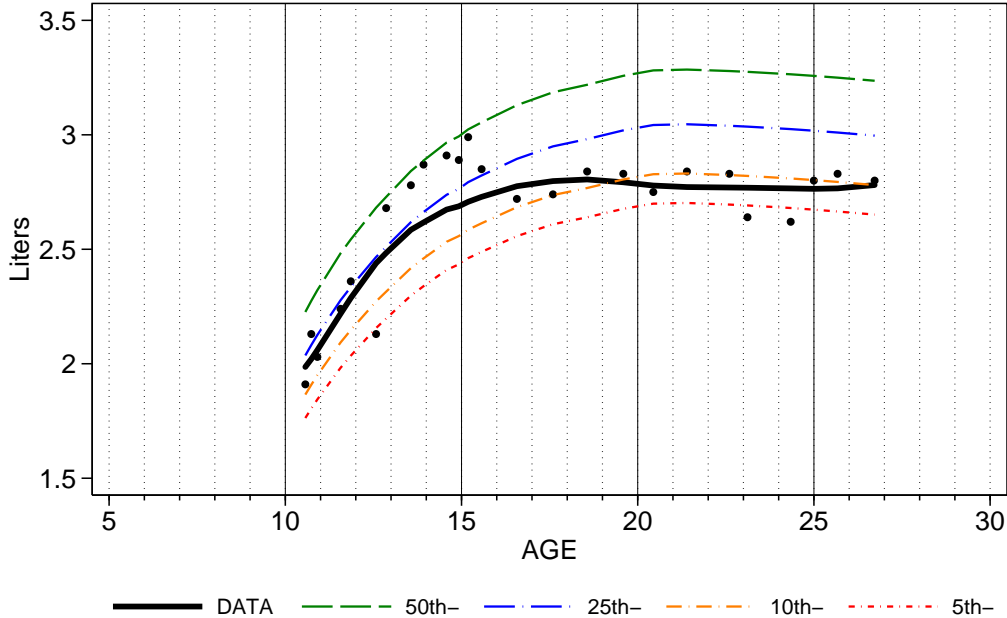

1970

**PATTERN OF GROWTH/DECLINE (Check One)**

- ( 1) Normal Growth
- ( 2) Normal Growth, Early Decline
- ( 3) Reduced Growth
- ( 4) Reduced Growth, Early Decline
- ( 9) Undetermined Pattern
- ( 8) Undetermined - not enough data

Maximum lung growth attained: ( 1) Yes ( 0) No

Plateau started: ( 2) No plateau ( 1) Yes ( 0) No

Decline started: ( 1) Yes ( 0) No

AGE AT each of the following periods (use '99' if N/A):

Maximum Lung Growth: \_\_\_\_ . \_\_\_\_

Start of Plateau: \_\_\_\_ . \_\_\_\_

Start of Decline: \_\_\_\_ . \_\_\_\_

### Pre-BD FEV1 Data and Percentiles: 1983

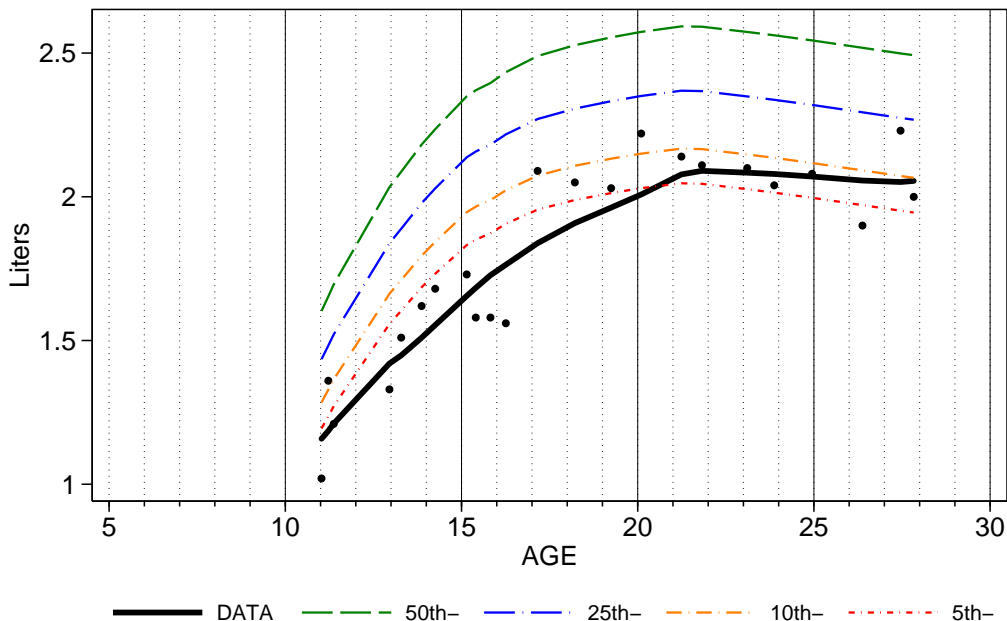

1983

**PATTERN OF GROWTH/DECLINE (Check One)**

- ( 1 ) Normal Growth
- ( 2 ) Normal Growth, Early Decline
- ( 3 ) Reduced Growth
- ( 4 ) Reduced Growth, Early Decline
- ( 9 ) Undetermined Pattern
- ( 8 ) Undetermined - not enough data

Maximum lung growth attained: ( 1 ) Yes ( 0 ) No

Plateau started: ( 2 ) No plateau ( 1 ) Yes ( 0 ) No

Decline started: ( 1 ) Yes ( 0 ) No

AGE AT each of the following periods (use '99' if N/A):

Maximum Lung Growth: \_\_\_\_ . \_\_\_\_

Start of Plateau: \_\_\_\_ . \_\_\_\_

Start of Decline: \_\_\_\_ . \_\_\_\_

### Pre-BD FEV1 Data and Percentiles: 1984

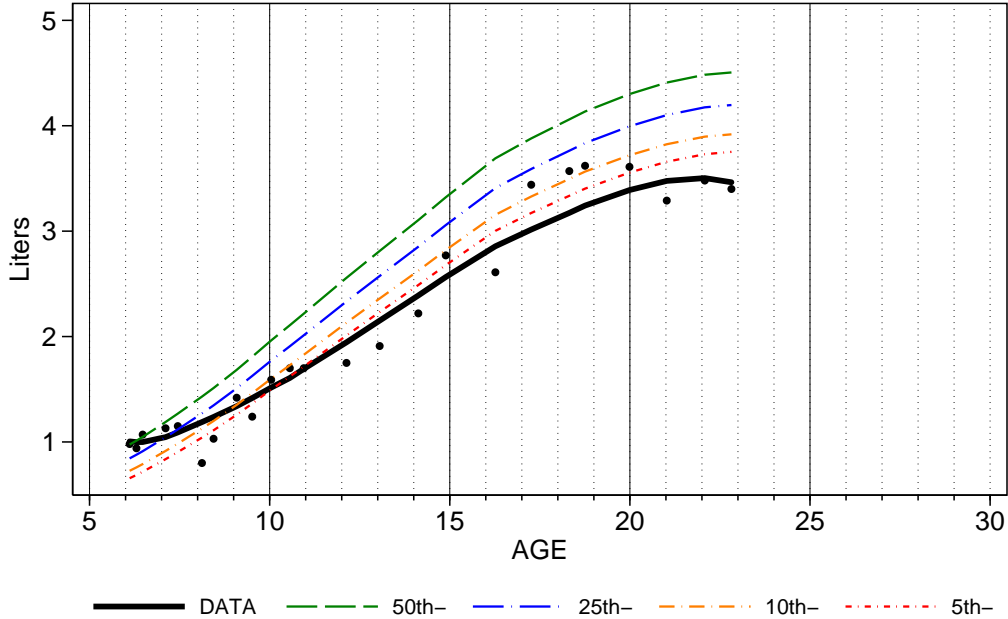

1984

**PATTERN OF GROWTH/DECLINE (Check One)**

- ( 1 ) Normal Growth
- ( 2 ) Normal Growth, Early Decline
- ( 3 ) Reduced Growth
- ( 4 ) Reduced Growth, Early Decline
- ( 9 ) Undetermined Pattern
- ( 8 ) Undetermined - not enough data

Maximum lung growth attained: ( 1 ) Yes ( 0 ) No

Plateau started: ( 2 ) No plateau ( 1 ) Yes ( 0 ) No

Decline started: ( 1 ) Yes ( 0 ) No

AGE AT each of the following periods (use '99' if N/A):

Maximum Lung Growth: \_\_\_\_ . \_\_\_\_

Start of Plateau: \_\_\_\_ . \_\_\_\_

Start of Decline: \_\_\_\_ . \_\_\_\_

### Pre-BD FEV1 Data and Percentiles: 1990

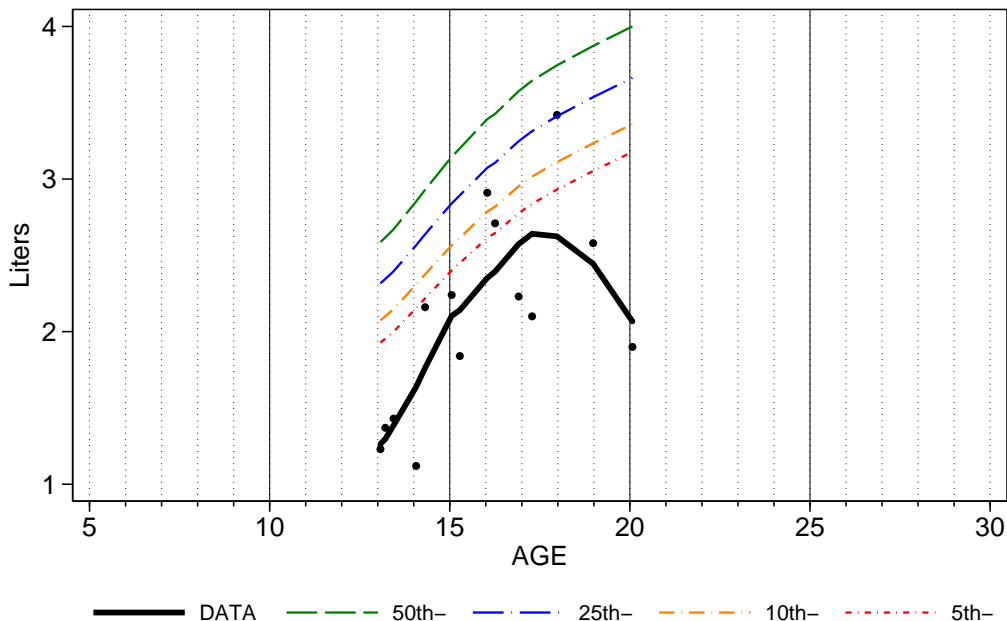

1990

**PATTERN OF GROWTH/DECLINE (Check One)**

- ( 1 ) Normal Growth
- ( 2 ) Normal Growth, Early Decline
- ( 3 ) Reduced Growth
- ( 4 ) Reduced Growth, Early Decline
- ( 9 ) Undetermined Pattern
- ( 8 ) Undetermined - not enough data

Maximum lung growth attained: ( 1 ) Yes ( 0 ) No

Plateau started: ( 2 ) No plateau ( 1 ) Yes ( 0 ) No

Decline started: ( 1 ) Yes ( 0 ) No

AGE AT each of the following periods (use '99' if N/A):

Maximum Lung Growth: \_\_\_\_ . \_\_\_\_

Start of Plateau: \_\_\_\_ . \_\_\_\_

Start of Decline: \_\_\_\_ . \_\_\_\_

### Pre-BD FEV1 Data and Percentiles: 1992

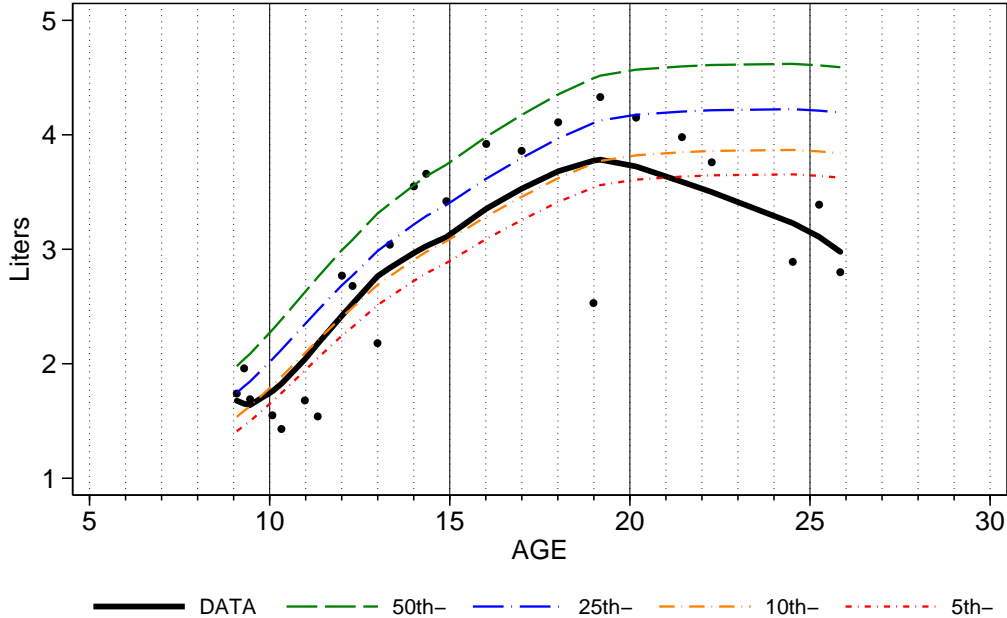

1992

**PATTERN OF GROWTH/DECLINE (Check One)**

- ( 1) Normal Growth
- ( 2) Normal Growth, Early Decline
- ( 3) Reduced Growth
- ( 4) Reduced Growth, Early Decline
- ( 9) Undetermined Pattern
- ( 8) Undetermined - not enough data

Maximum lung growth attained: ( 1) Yes ( 0) No

Plateau started: ( 2) No plateau ( 1) Yes ( 0) No

Decline started: ( 1) Yes ( 0) No

AGE AT each of the following periods (use '99' if N/A):

Maximum Lung Growth: \_\_\_\_ . \_\_\_\_

Start of Plateau: \_\_\_\_ . \_\_\_\_

Start of Decline: \_\_\_\_ . \_\_\_\_

### Pre-BD FEV1 Data and Percentiles: 1994

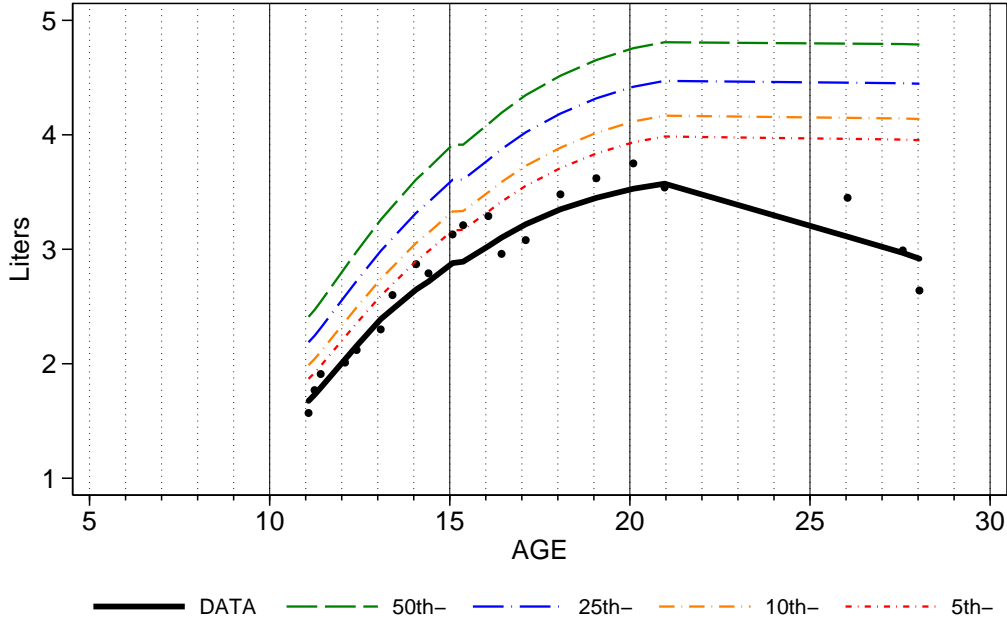

1994

**PATTERN OF GROWTH/DECLINE (Check One)**

- ( 1 ) Normal Growth
- ( 2 ) Normal Growth, Early Decline
- ( 3 ) Reduced Growth
- ( 4 ) Reduced Growth, Early Decline
- ( 9 ) Undetermined Pattern
- ( 8 ) Undetermined - not enough data

Maximum lung growth attained: ( 1 ) Yes ( 0 ) No

Plateau started: ( 2 ) No plateau ( 1 ) Yes ( 0 ) No

Decline started: ( 1 ) Yes ( 0 ) No

AGE AT each of the following periods (use '99' if N/A):

Maximum Lung Growth: \_\_\_\_ . \_\_\_\_

Start of Plateau: \_\_\_\_ . \_\_\_\_

Start of Decline: \_\_\_\_ . \_\_\_\_

### Pre-BD FEV1 Data and Percentiles: 1997

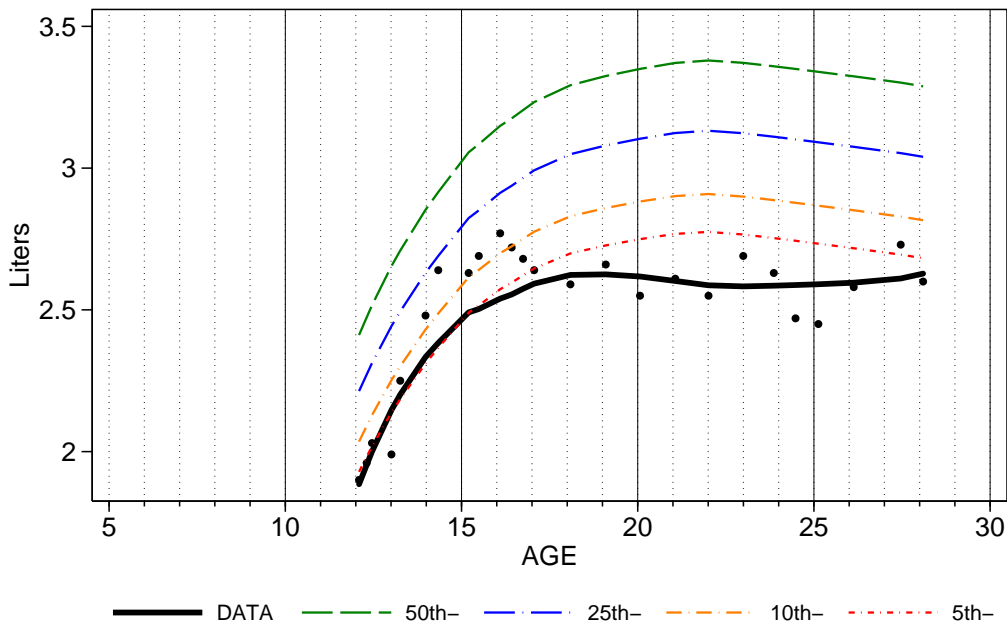

1997

**PATTERN OF GROWTH/DECLINE (Check One)**

- ( 1) Normal Growth
- ( 2) Normal Growth, Early Decline
- ( 3) Reduced Growth
- ( 4) Reduced Growth, Early Decline
- ( 9) Undetermined Pattern
- ( 8) Undetermined - not enough data

Maximum lung growth attained: ( 1) Yes ( 0) No

Plateau started: ( 2) No plateau ( 1) Yes ( 0) No

Decline started: ( 1) Yes ( 0) No

AGE AT each of the following periods (use '99' if N/A):

Maximum Lung Growth: \_\_\_\_ . \_\_\_\_

Start of Plateau: \_\_\_\_ . \_\_\_\_

Start of Decline: \_\_\_\_ . \_\_\_\_

### Pre-BD FEV1 Data and Percentiles: 2000

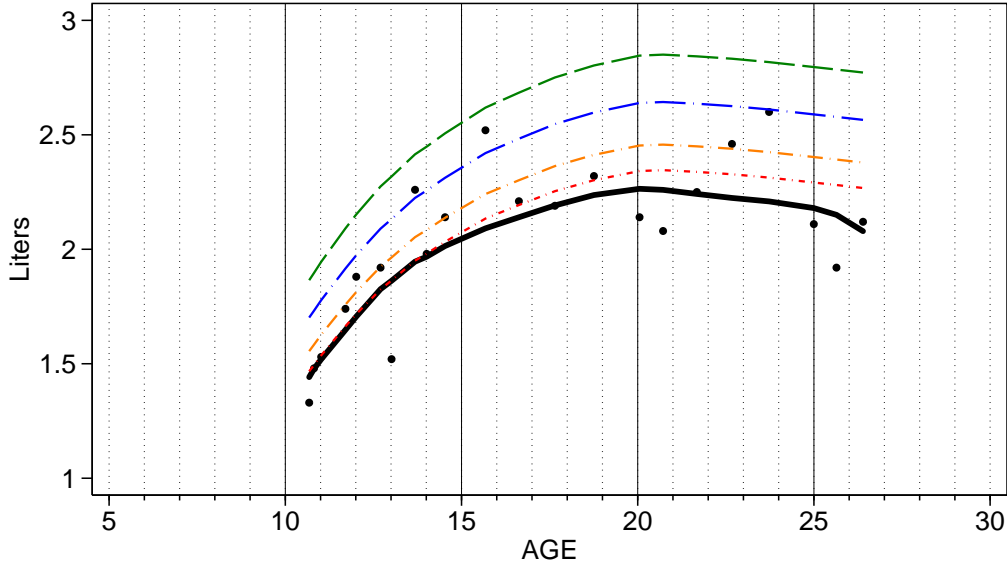

DATA  
  50th-  
  25th-  
  10th-  
  5th-

2000

**PATTERN OF GROWTH/DECLINE (Check One)**

- ( 1 ) Normal Growth
- ( 2 ) Normal Growth, Early Decline
- ( 3 ) Reduced Growth
- ( 4 ) Reduced Growth, Early Decline
- ( 9 ) Undetermined Pattern
- ( 8 ) Undetermined - not enough data

Maximum lung growth attained: ( 1 ) Yes ( 0 ) No

Plateau started: ( 2 ) No plateau ( 1 ) Yes ( 0 ) No

Decline started: ( 1 ) Yes ( 0 ) No

AGE AT each of the following periods (use '99' if N/A):

Maximum Lung Growth: \_\_\_\_ . \_\_\_\_

Start of Plateau: \_\_\_\_ . \_\_\_\_

Start of Decline: \_\_\_\_ . \_\_\_\_



### Pre-BD FEV1 Data and Percentiles: 2001

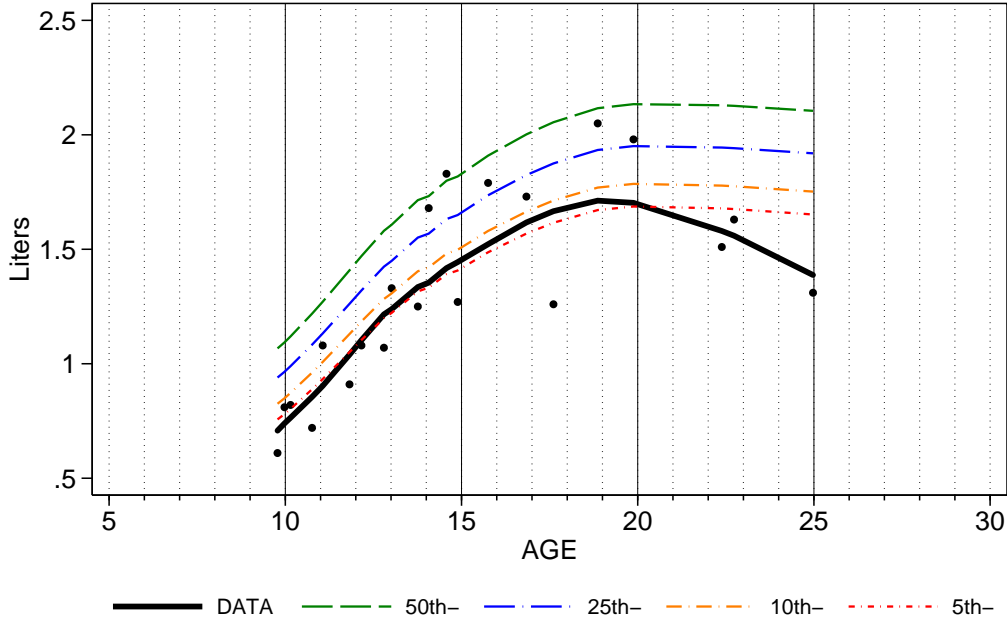

2001

**PATTERN OF GROWTH/DECLINE (Check One)**

- ( 1) Normal Growth
- ( 2) Normal Growth, Early Decline
- ( 3) Reduced Growth
- ( 4) Reduced Growth, Early Decline
- ( 9) Undetermined Pattern
- ( 8) Undetermined - not enough data

Maximum lung growth attained: ( 1) Yes ( 0) No

Plateau started: ( 2) No plateau ( 1) Yes ( 0) No

Decline started: ( 1) Yes ( 0) No

AGE AT each of the following periods (use '99' if N/A):

Maximum Lung Growth: \_\_\_\_ . \_\_\_\_

Start of Plateau: \_\_\_\_ . \_\_\_\_

Start of Decline: \_\_\_\_ . \_\_\_\_

### Pre-BD FEV1 Data and Percentiles: 2006

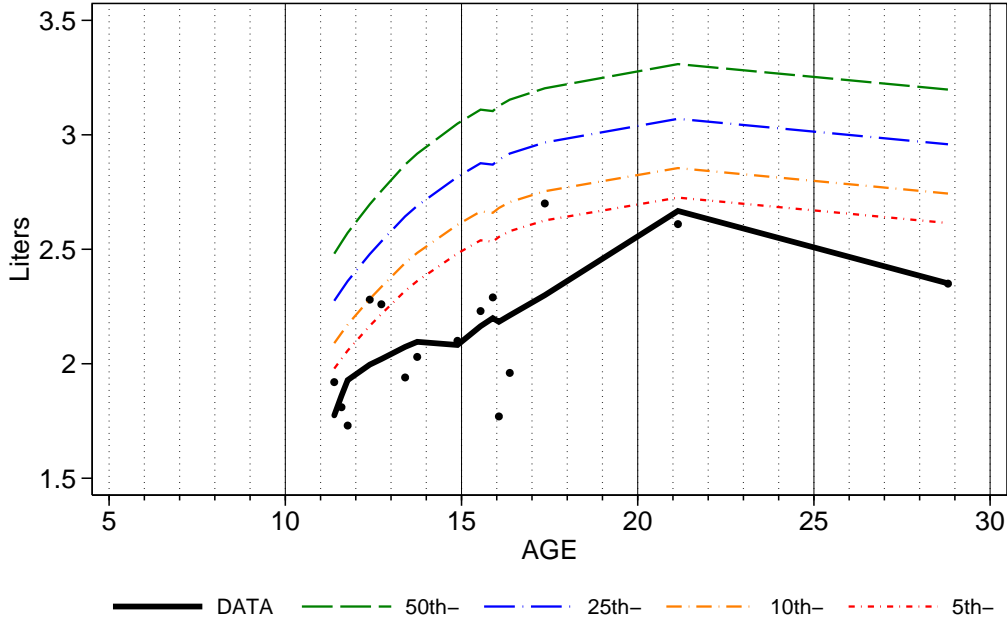

2006

**PATTERN OF GROWTH/DECLINE (Check One)**

- ( 1) Normal Growth
- ( 2) Normal Growth, Early Decline
- ( 3) Reduced Growth
- ( 4) Reduced Growth, Early Decline
- ( 9) Undetermined Pattern
- ( 8) Undetermined - not enough data

Maximum lung growth attained: ( 1) Yes ( 0) No

Plateau started: ( 2) No plateau ( 1) Yes ( 0) No

Decline started: ( 1) Yes ( 0) No

AGE AT each of the following periods (use '99' if N/A):

Maximum Lung Growth: \_\_\_\_ . \_\_\_\_

Start of Plateau: \_\_\_\_ . \_\_\_\_

Start of Decline: \_\_\_\_ . \_\_\_\_

### Pre-BD FEV1 Data and Percentiles: 2008

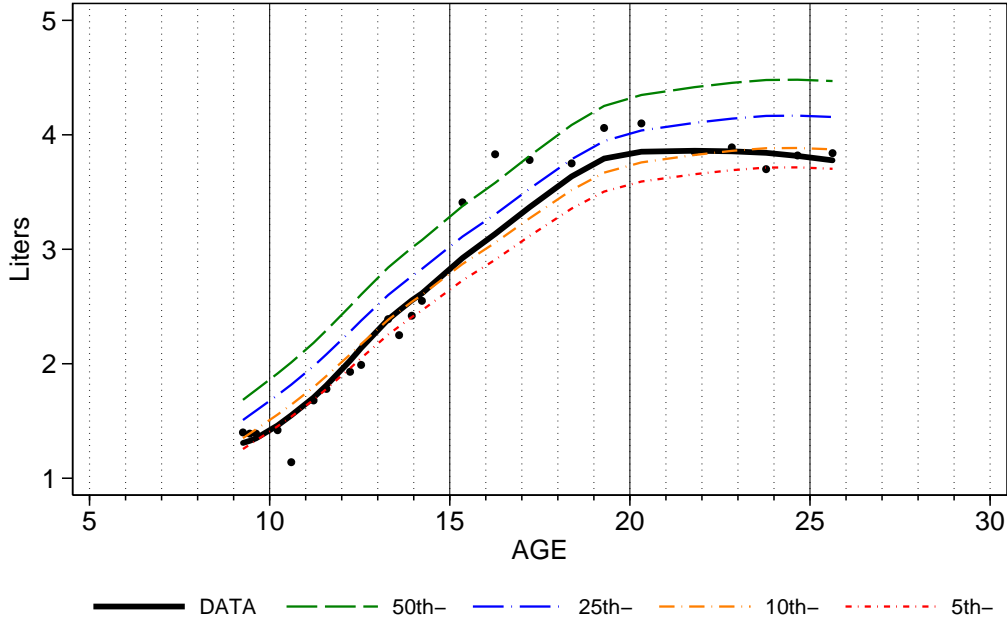

2008

**PATTERN OF GROWTH/DECLINE (Check One)**

- ( 1 ) Normal Growth
- ( 2 ) Normal Growth, Early Decline
- ( 3 ) Reduced Growth
- ( 4 ) Reduced Growth, Early Decline
- ( 9 ) Undetermined Pattern
- ( 8 ) Undetermined - not enough data

Maximum lung growth attained: ( 1 ) Yes ( 0 ) No

Plateau started: ( 2 ) No plateau ( 1 ) Yes ( 0 ) No

Decline started: ( 1 ) Yes ( 0 ) No

AGE AT each of the following periods (use '99' if N/A):

Maximum Lung Growth: \_\_\_\_ . \_\_\_\_

Start of Plateau: \_\_\_\_ . \_\_\_\_

Start of Decline: \_\_\_\_ . \_\_\_\_

### Pre-BD FEV1 Data and Percentiles: 2020

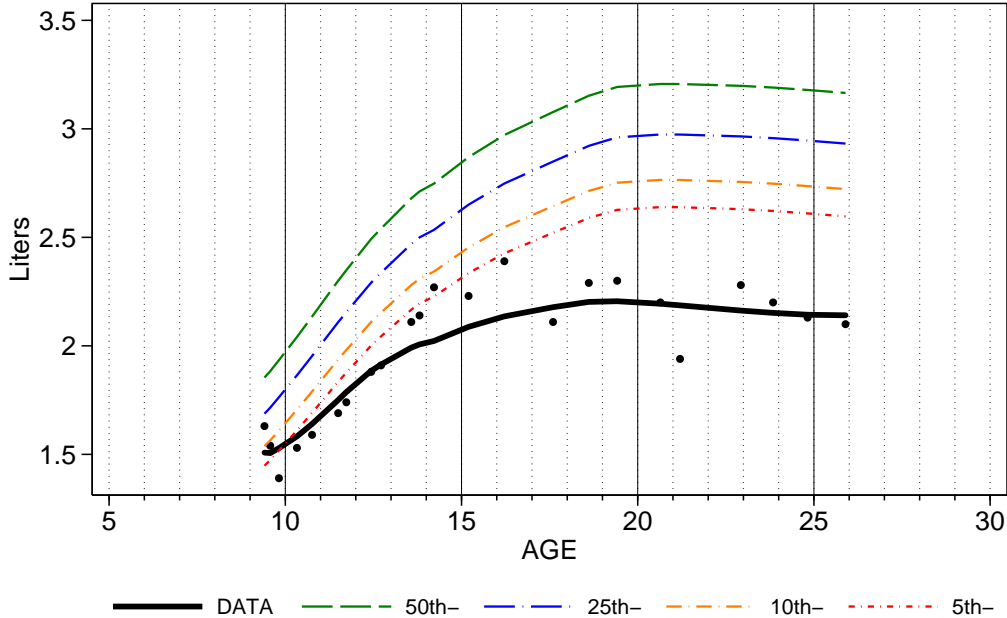

2020

**PATTERN OF GROWTH/DECLINE (Check One)**

- ( 1 ) Normal Growth
- ( 2 ) Normal Growth, Early Decline
- ( 3 ) Reduced Growth
- ( 4 ) Reduced Growth, Early Decline
- ( 9 ) Undetermined Pattern
- ( 8 ) Undetermined - not enough data

Maximum lung growth attained: ( 1 ) Yes ( 0 ) No

Plateau started: ( 2 ) No plateau ( 1 ) Yes ( 0 ) No

Decline started: ( 1 ) Yes ( 0 ) No

AGE AT each of the following periods (use '99' if N/A):

Maximum Lung Growth: \_\_\_\_ . \_\_\_\_

Start of Plateau: \_\_\_\_ . \_\_\_\_

Start of Decline: \_\_\_\_ . \_\_\_\_

### Pre-BD FEV1 Data and Percentiles: 2026

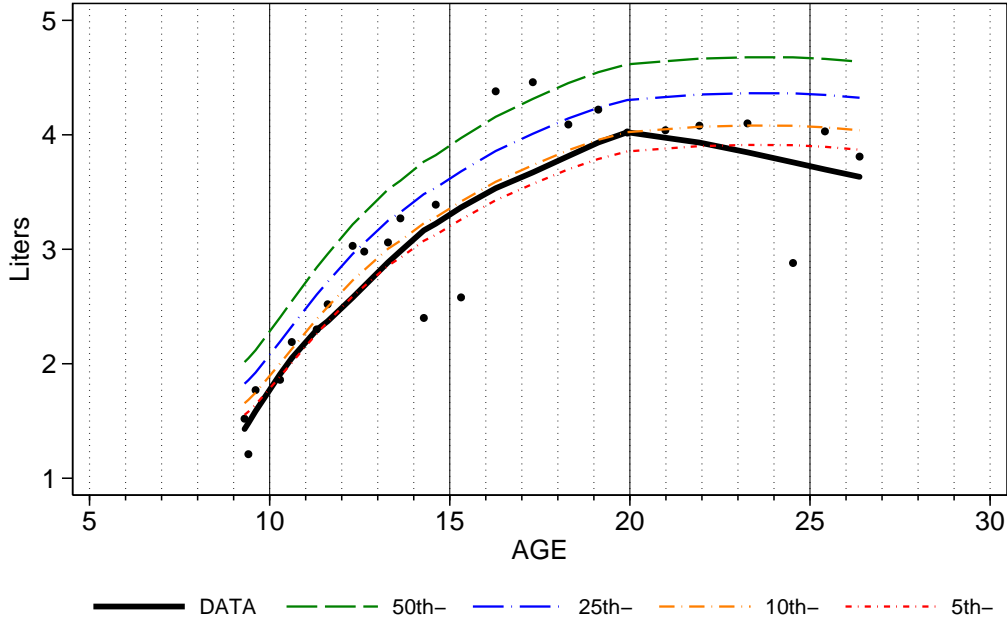

2026

**PATTERN OF GROWTH/DECLINE (Check One)**

- ( 1) Normal Growth
- ( 2) Normal Growth, Early Decline
- ( 3) Reduced Growth
- ( 4) Reduced Growth, Early Decline
- ( 9) Undetermined Pattern
- ( 8) Undetermined - not enough data

Maximum lung growth attained: ( 1) Yes ( 0) No

Plateau started: ( 2) No plateau ( 1) Yes ( 0) No

Decline started: ( 1) Yes ( 0) No

AGE AT each of the following periods (use '99' if N/A):

Maximum Lung Growth: \_\_\_\_ . \_\_\_\_

Start of Plateau: \_\_\_\_ . \_\_\_\_

Start of Decline: \_\_\_\_ . \_\_\_\_

### Pre-BD FEV1 Data and Percentiles: 2029

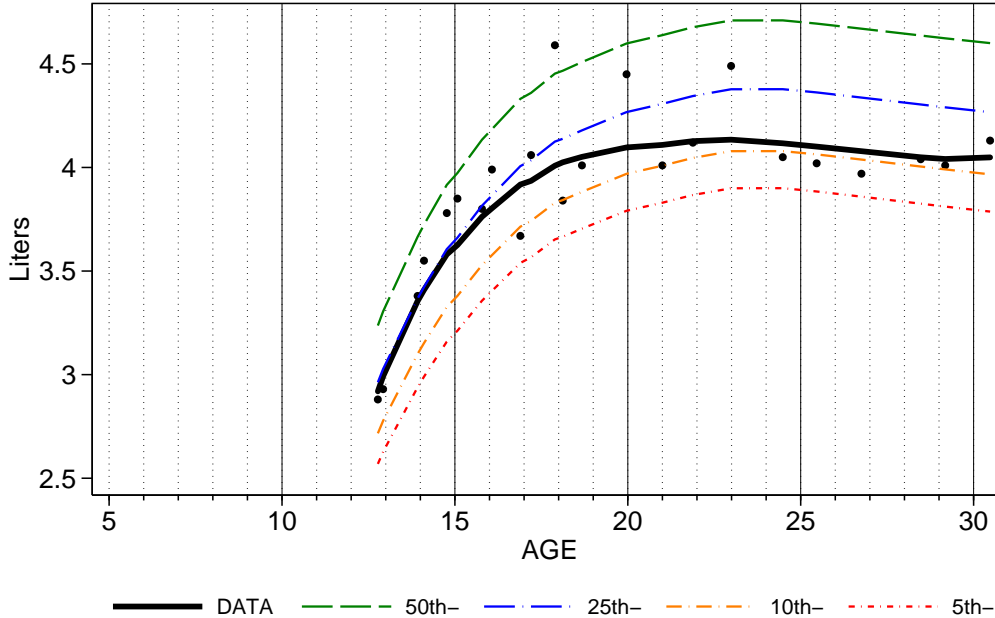

2029

**PATTERN OF GROWTH/DECLINE (Check One)**

- ( 1 ) Normal Growth
- ( 2 ) Normal Growth, Early Decline
- ( 3 ) Reduced Growth
- ( 4 ) Reduced Growth, Early Decline
- ( 9 ) Undetermined Pattern
- ( 8 ) Undetermined - not enough data

Maximum lung growth attained: ( 1 ) Yes ( 0 ) No

Plateau started: ( 2 ) No plateau ( 1 ) Yes ( 0 ) No

Decline started: ( 1 ) Yes ( 0 ) No

AGE AT each of the following periods (use '99' if N/A):

Maximum Lung Growth: \_\_\_\_ . \_\_\_\_

Start of Plateau: \_\_\_\_ . \_\_\_\_

Start of Decline: \_\_\_\_ . \_\_\_\_

### Pre-BD FEV1 Data and Percentiles: 2037

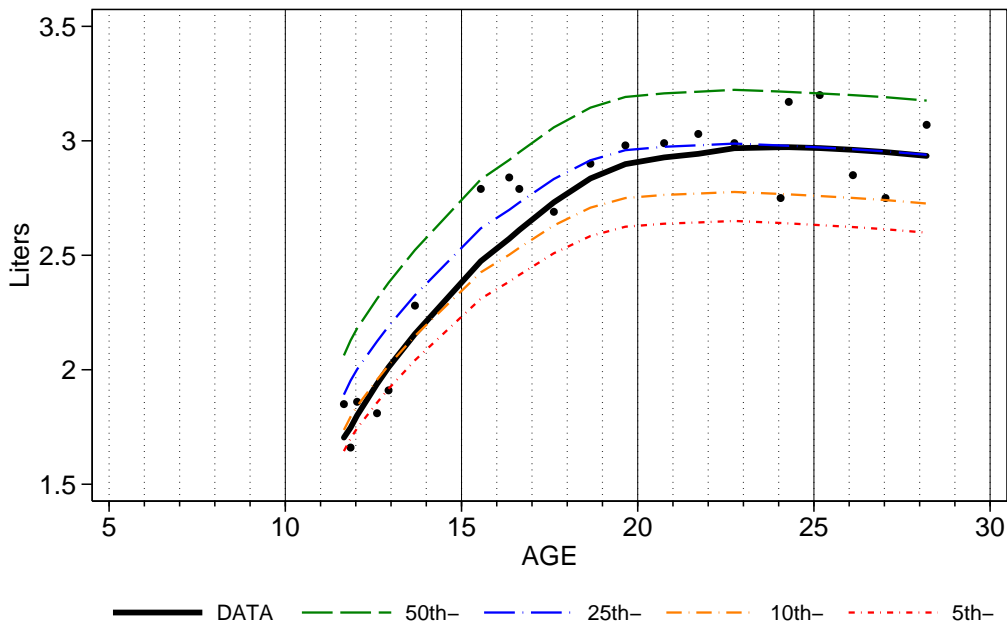

2037

**PATTERN OF GROWTH/DECLINE (Check One)**

- ( 1) Normal Growth
- ( 2) Normal Growth, Early Decline
- ( 3) Reduced Growth
- ( 4) Reduced Growth, Early Decline
- ( 9) Undetermined Pattern
- ( 8) Undetermined - not enough data

Maximum lung growth attained: ( 1) Yes ( 0) No

Plateau started: ( 2) No plateau ( 1) Yes ( 0) No

Decline started: ( 1) Yes ( 0) No

AGE AT each of the following periods (use '99' if N/A):

Maximum Lung Growth: \_\_\_\_ . \_\_\_\_

Start of Plateau: \_\_\_\_ . \_\_\_\_

Start of Decline: \_\_\_\_ . \_\_\_\_

### Pre-BD FEV1 Data and Percentiles: 1038

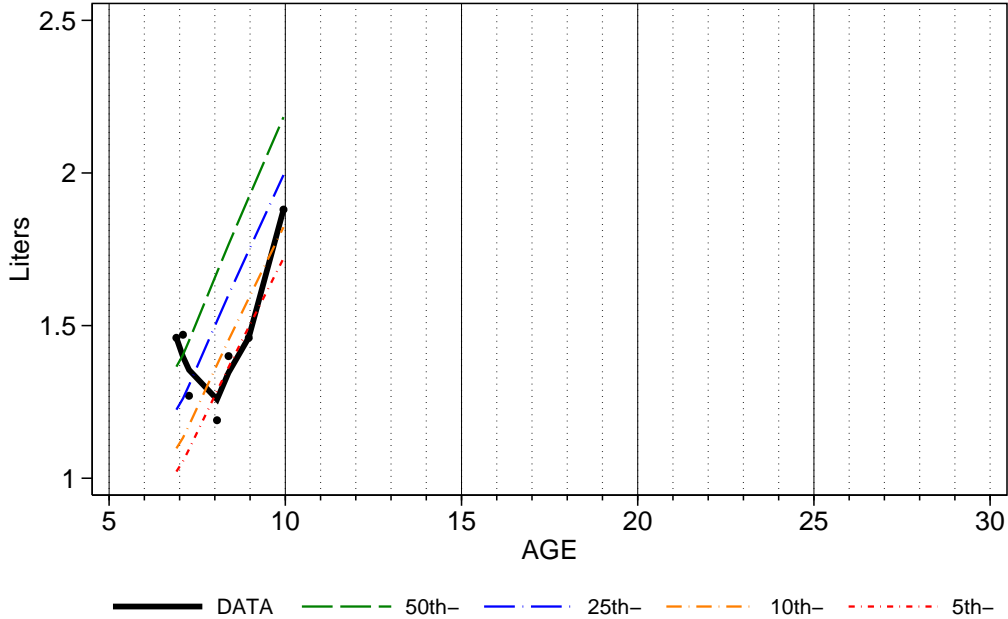

1038

**PATTERN OF GROWTH/DECLINE (Check One)**

- ( 1) Normal Growth
- ( 2) Normal Growth, Early Decline
- ( 3) Reduced Growth
- ( 4) Reduced Growth, Early Decline
- ( 9) Undetermined Pattern
- ( 8) Undetermined - not enough data

Maximum lung growth attained: ( 1) Yes ( 0) No

Plateau started: ( 2) No plateau ( 1) Yes ( 0) No

Decline started: ( 1) Yes ( 0) No

AGE AT each of the following periods (use '99' if N/A):

Maximum Lung Growth: \_\_\_\_ . \_\_\_\_

Start of Plateau: \_\_\_\_ . \_\_\_\_

Start of Decline: \_\_\_\_ . \_\_\_\_



### Pre-BD FEV1 Data and Percentiles: 1043

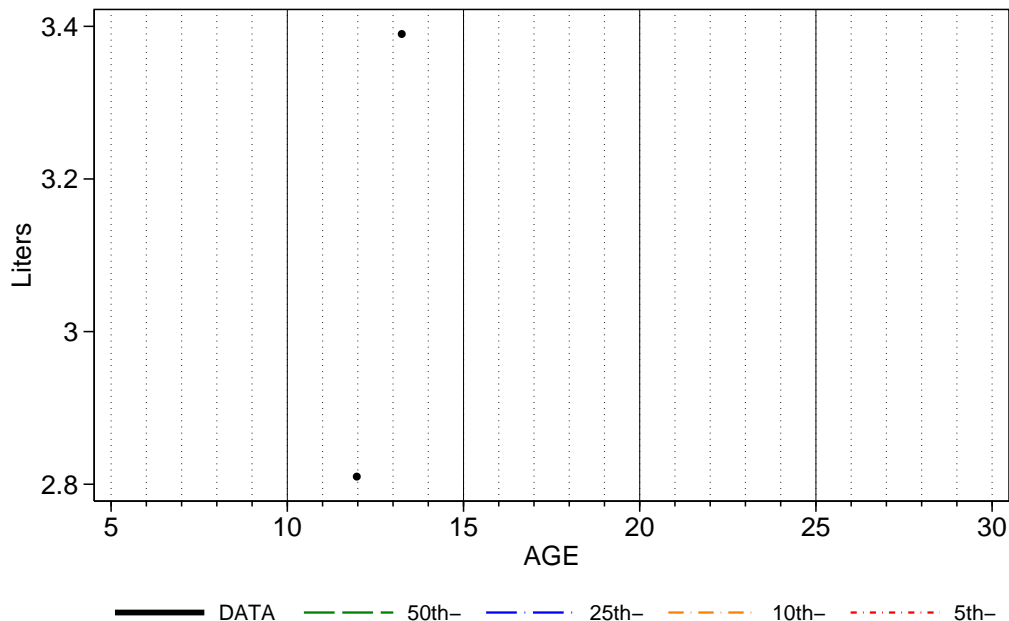

1043

**PATTERN OF GROWTH/DECLINE (Check One)**

- ( 1) Normal Growth
- ( 2) Normal Growth, Early Decline
- ( 3) Reduced Growth
- ( 4) Reduced Growth, Early Decline
- ( 9) Undetermined Pattern
- ( 8) Undetermined - not enough data

Maximum lung growth attained: ( 1) Yes ( 0) No

Plateau started: ( 2) No plateau ( 1) Yes ( 0) No

Decline started: ( 1) Yes ( 0) No

AGE AT each of the following periods (use '99' if N/A):

Maximum Lung Growth: \_\_\_\_ . \_\_\_\_

Start of Plateau: \_\_\_\_ . \_\_\_\_

Start of Decline: \_\_\_\_ . \_\_\_\_

### Pre-BD FEV1 Data and Percentiles: 1063

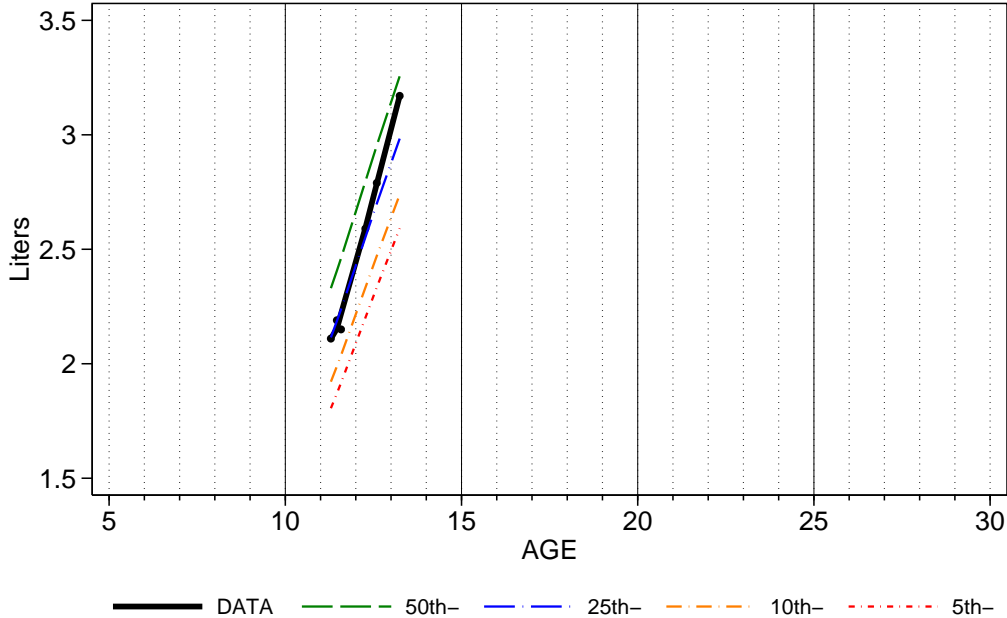

1063

**PATTERN OF GROWTH/DECLINE (Check One)**

- ( 1) Normal Growth
- ( 2) Normal Growth, Early Decline
- ( 3) Reduced Growth
- ( 4) Reduced Growth, Early Decline
- ( 9) Undetermined Pattern
- ( 8) Undetermined - not enough data

Maximum lung growth attained: ( 1) Yes ( 0) No

Plateau started: ( 2) No plateau ( 1) Yes ( 0) No

Decline started: ( 1) Yes ( 0) No

AGE AT each of the following periods (use '99' if N/A):

Maximum Lung Growth: \_\_\_\_ . \_\_\_\_

Start of Plateau: \_\_\_\_ . \_\_\_\_

Start of Decline: \_\_\_\_ . \_\_\_\_

### Pre-BD FEV1 Data and Percentiles: 1065

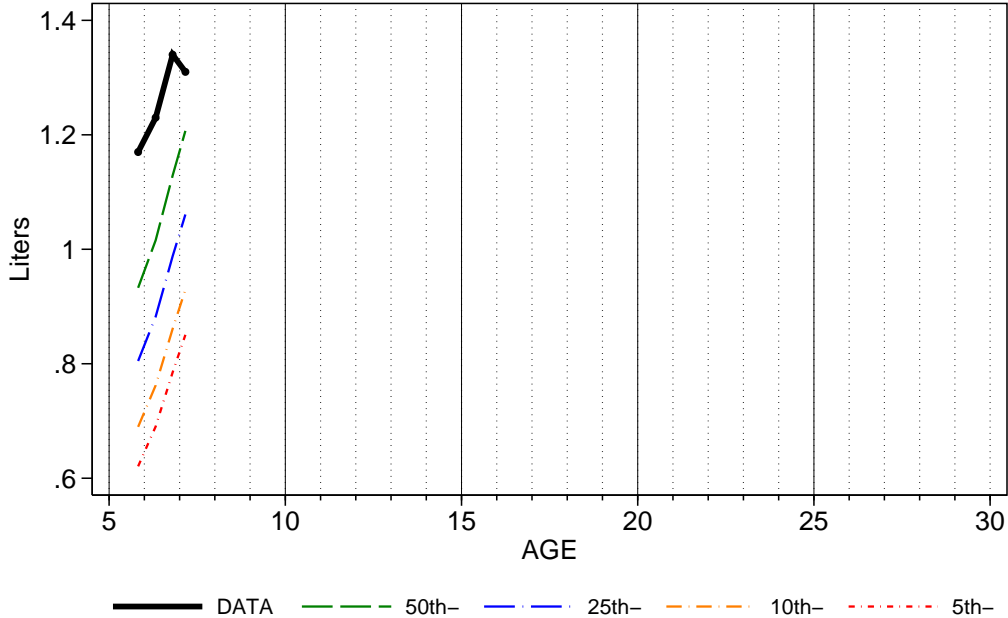

1065

**PATTERN OF GROWTH/DECLINE (Check One)**

- ( 1) Normal Growth
- ( 2) Normal Growth, Early Decline
- ( 3) Reduced Growth
- ( 4) Reduced Growth, Early Decline
- ( 9) Undetermined Pattern
- ( 8) Undetermined - not enough data

Maximum lung growth attained: ( 1) Yes ( 0) No

Plateau started: ( 2) No plateau ( 1) Yes ( 0) No

Decline started: ( 1) Yes ( 0) No

AGE AT each of the following periods (use '99' if N/A):

Maximum Lung Growth: \_\_\_\_ . \_\_\_\_

Start of Plateau: \_\_\_\_ . \_\_\_\_

Start of Decline: \_\_\_\_ . \_\_\_\_

### Pre-BD FEV1 Data and Percentiles: 1089

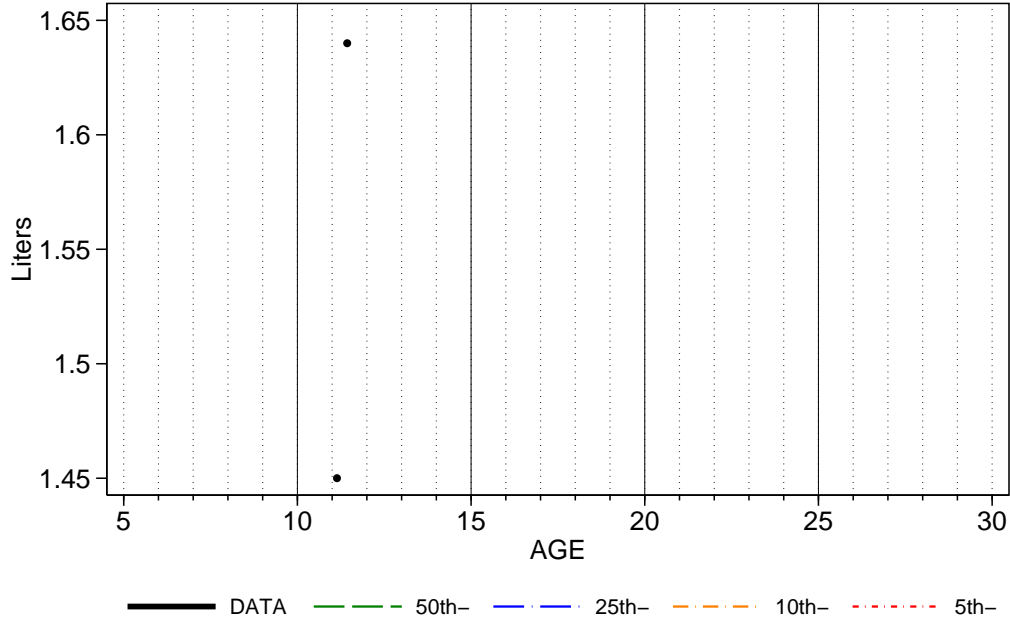

1089

**PATTERN OF GROWTH/DECLINE (Check One)**

- ( 1) Normal Growth
- ( 2) Normal Growth, Early Decline
- ( 3) Reduced Growth
- ( 4) Reduced Growth, Early Decline
- ( 9) Undetermined Pattern
- ( 8) Undetermined - not enough data

Maximum lung growth attained: ( 1) Yes ( 0) No

Plateau started: ( 2) No plateau ( 1) Yes ( 0) No

Decline started: ( 1) Yes ( 0) No

AGE AT each of the following periods (use '99' if N/A):

Maximum Lung Growth: \_\_\_\_ . \_\_\_\_

Start of Plateau: \_\_\_\_ . \_\_\_\_

Start of Decline: \_\_\_\_ . \_\_\_\_

### Pre-BD FEV1 Data and Percentiles: 1124

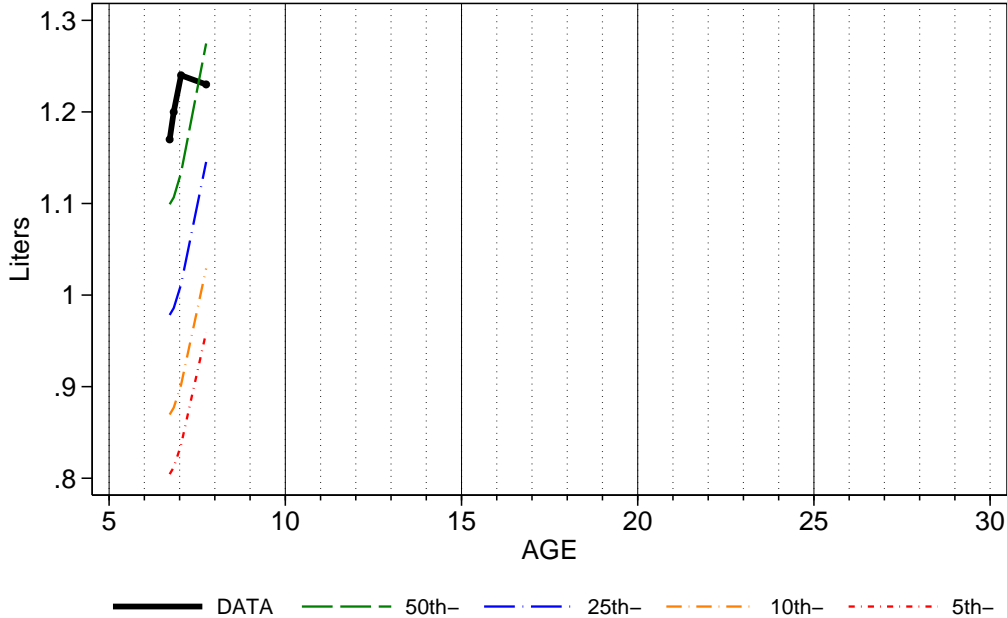

1124

**PATTERN OF GROWTH/DECLINE (Check One)**

- ( 1) Normal Growth
- ( 2) Normal Growth, Early Decline
- ( 3) Reduced Growth
- ( 4) Reduced Growth, Early Decline
- ( 9) Undetermined Pattern
- ( 8) Undetermined - not enough data

Maximum lung growth attained: ( 1) Yes ( 0) No

Plateau started: ( 2) No plateau ( 1) Yes ( 0) No

Decline started: ( 1) Yes ( 0) No

AGE AT each of the following periods (use '99' if N/A):

Maximum Lung Growth: \_\_\_\_ . \_\_\_\_

Start of Plateau: \_\_\_\_ . \_\_\_\_

Start of Decline: \_\_\_\_ . \_\_\_\_

### Pre-BD FEV1 Data and Percentiles: 1133

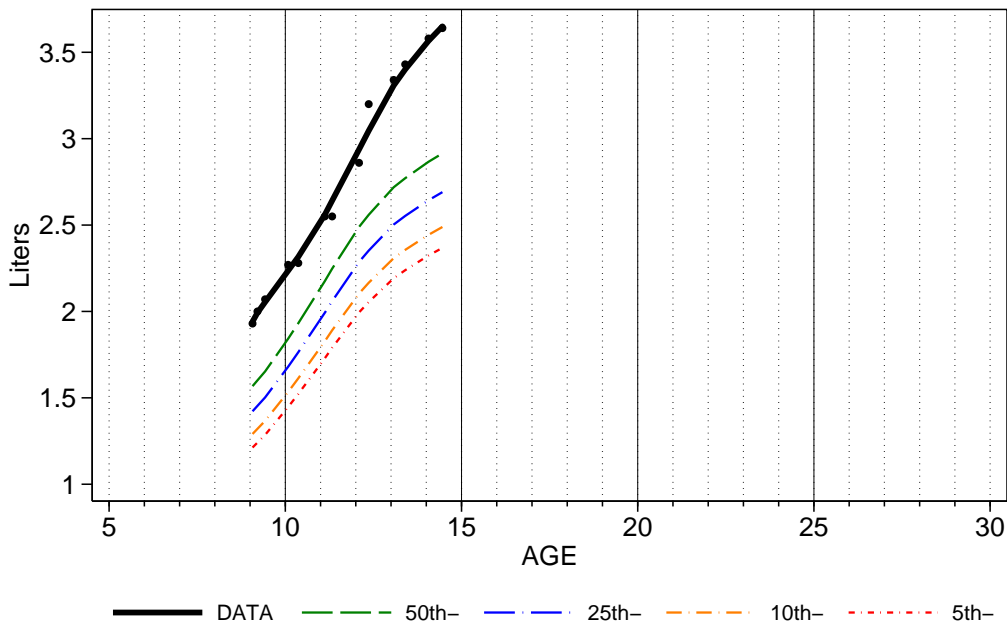

1133

**PATTERN OF GROWTH/DECLINE (Check One)**

- ( 1) Normal Growth
- ( 2) Normal Growth, Early Decline
- ( 3) Reduced Growth
- ( 4) Reduced Growth, Early Decline
- ( 9) Undetermined Pattern
- ( 8) Undetermined - not enough data

Maximum lung growth attained: ( 1) Yes ( 0) No

Plateau started: ( 2) No plateau ( 1) Yes ( 0) No

Decline started: ( 1) Yes ( 0) No

AGE AT each of the following periods (use '99' if N/A):

Maximum Lung Growth: \_\_\_\_ . \_\_\_\_

Start of Plateau: \_\_\_\_ . \_\_\_\_

Start of Decline: \_\_\_\_ . \_\_\_\_

### Pre-BD FEV1 Data and Percentiles: 1138

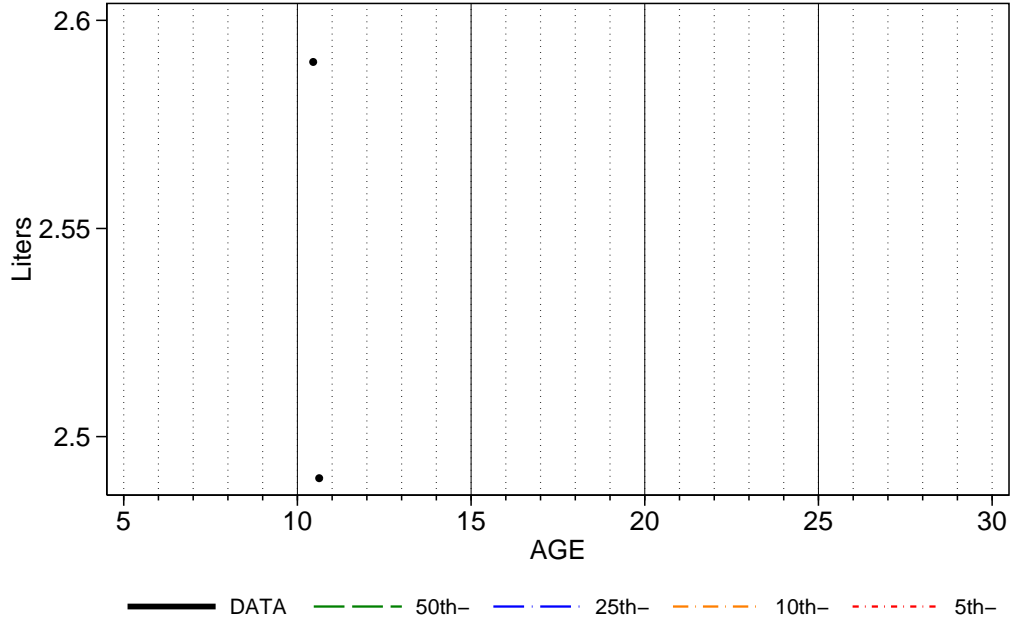

1138

**PATTERN OF GROWTH/DECLINE (Check One)**

- ( 1) Normal Growth
- ( 2) Normal Growth, Early Decline
- ( 3) Reduced Growth
- ( 4) Reduced Growth, Early Decline
- ( 9) Undetermined Pattern
- ( 8) Undetermined - not enough data

Maximum lung growth attained: ( 1) Yes ( 0) No

Plateau started: ( 2) No plateau ( 1) Yes ( 0) No

Decline started: ( 1) Yes ( 0) No

AGE AT each of the following periods (use '99' if N/A):

Maximum Lung Growth: \_\_\_\_ . \_\_\_\_

Start of Plateau: \_\_\_\_ . \_\_\_\_

Start of Decline: \_\_\_\_ . \_\_\_\_

### Pre-BD FEV1 Data and Percentiles: 1141

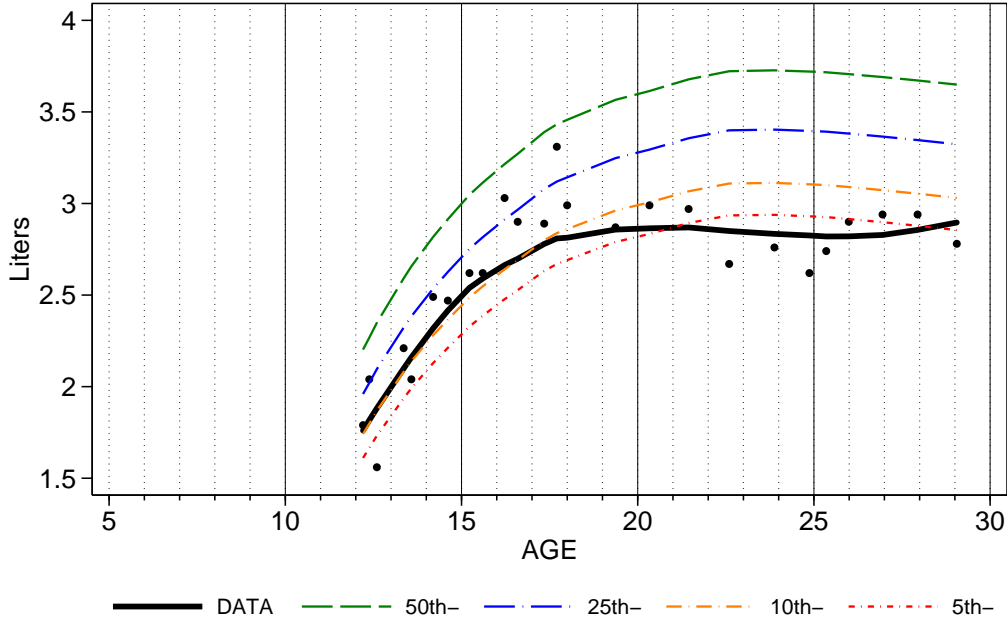

1141

**PATTERN OF GROWTH/DECLINE (Check One)**

- ( 1) Normal Growth
- ( 2) Normal Growth, Early Decline
- ( 3) Reduced Growth
- ( 4) Reduced Growth, Early Decline
- ( 9) Undetermined Pattern
- ( 8) Undetermined - not enough data

Maximum lung growth attained: ( 1) Yes ( 0) No

Plateau started: ( 2) No plateau ( 1) Yes ( 0) No

Decline started: ( 1) Yes ( 0) No

AGE AT each of the following periods (use '99' if N/A):

Maximum Lung Growth: \_\_\_\_ . \_\_\_\_

Start of Plateau: \_\_\_\_ . \_\_\_\_

Start of Decline: \_\_\_\_ . \_\_\_\_



### Pre-BD FEV1 Data and Percentiles: 1150

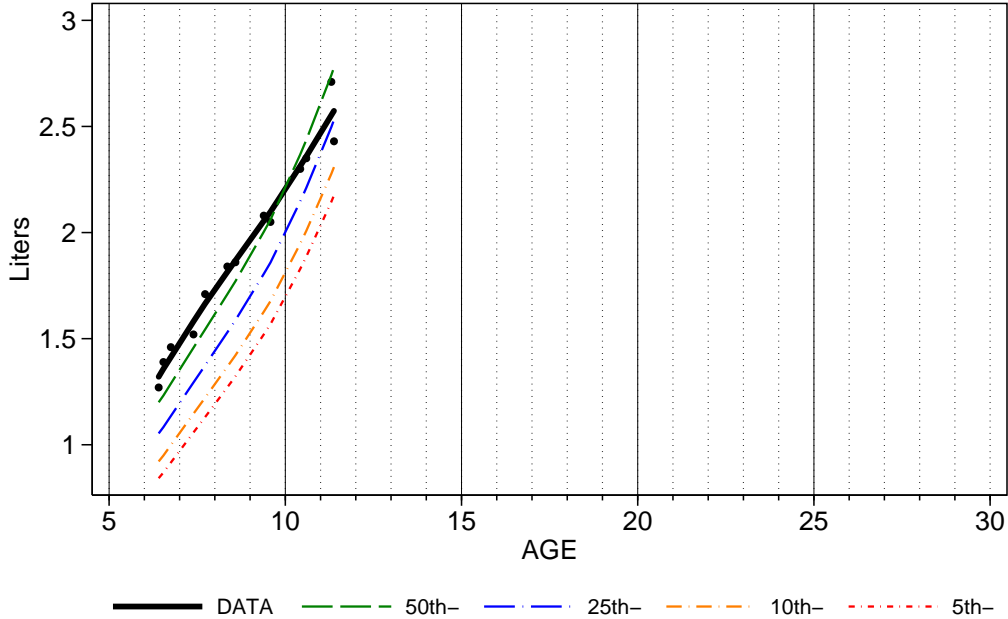

1150

**PATTERN OF GROWTH/DECLINE (Check One)**

- ( 1 ) Normal Growth
- ( 2 ) Normal Growth, Early Decline
- ( 3 ) Reduced Growth
- ( 4 ) Reduced Growth, Early Decline
- ( 9 ) Undetermined Pattern
- ( 8 ) Undetermined - not enough data

Maximum lung growth attained: ( 1 ) Yes ( 0 ) No

Plateau started: ( 2 ) No plateau ( 1 ) Yes ( 0 ) No

Decline started: ( 1 ) Yes ( 0 ) No

AGE AT each of the following periods (use '99' if N/A):

Maximum Lung Growth: \_\_\_\_ . \_\_\_\_

Start of Plateau: \_\_\_\_ . \_\_\_\_

Start of Decline: \_\_\_\_ . \_\_\_\_

### Pre-BD FEV1 Data and Percentiles: 1160

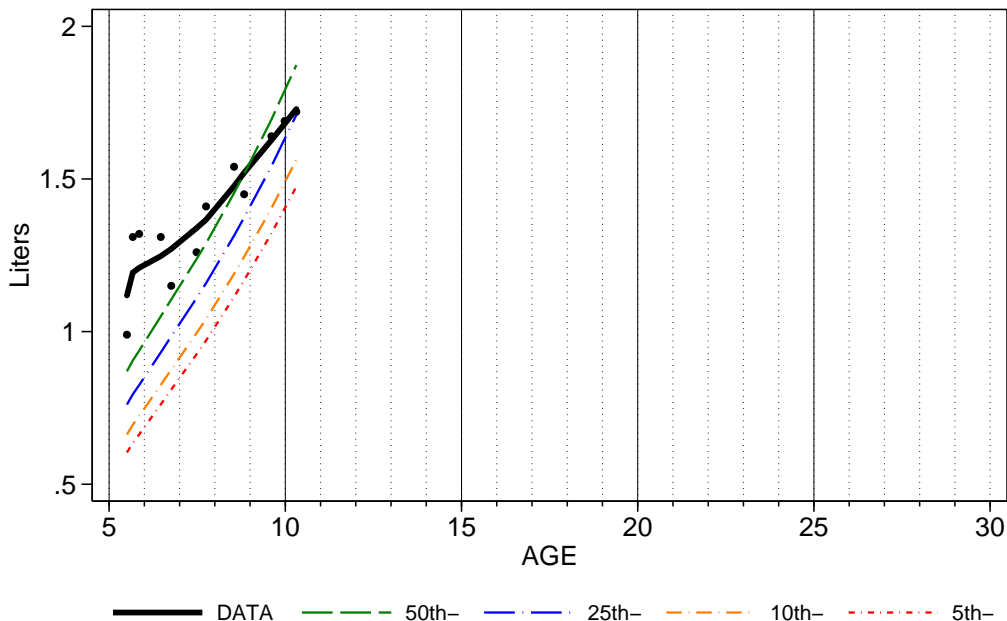

1160

**PATTERN OF GROWTH/DECLINE (Check One)**

- ( 1) Normal Growth
- ( 2) Normal Growth, Early Decline
- ( 3) Reduced Growth
- ( 4) Reduced Growth, Early Decline
- ( 9) Undetermined Pattern
- ( 8) Undetermined - not enough data

Maximum lung growth attained: ( 1) Yes ( 0) No

Plateau started: ( 2) No plateau ( 1) Yes ( 0) No

Decline started: ( 1) Yes ( 0) No

AGE AT each of the following periods (use '99' if N/A):

Maximum Lung Growth: \_\_\_\_ . \_\_\_\_

Start of Plateau: \_\_\_\_ . \_\_\_\_

Start of Decline: \_\_\_\_ . \_\_\_\_

### Pre-BD FEV1 Data and Percentiles: 1184

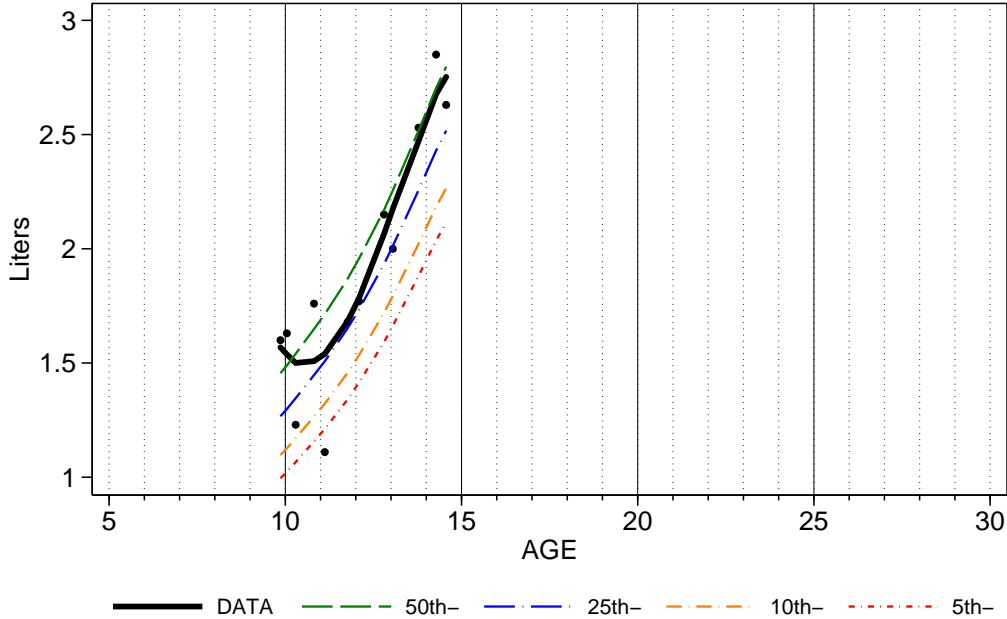

1184

**PATTERN OF GROWTH/DECLINE (Check One)**

- ( 1 ) Normal Growth
- ( 2 ) Normal Growth, Early Decline
- ( 3 ) Reduced Growth
- ( 4 ) Reduced Growth, Early Decline
- ( 9 ) Undetermined Pattern
- ( 8 ) Undetermined - not enough data

Maximum lung growth attained: ( 1 ) Yes ( 0 ) No

Plateau started: ( 2 ) No plateau ( 1 ) Yes ( 0 ) No

Decline started: ( 1 ) Yes ( 0 ) No

AGE AT each of the following periods (use '99' if N/A):

Maximum Lung Growth: \_\_\_\_ . \_\_\_\_

Start of Plateau: \_\_\_\_ . \_\_\_\_

Start of Decline: \_\_\_\_ . \_\_\_\_

### Pre-BD FEV1 Data and Percentiles: 1200

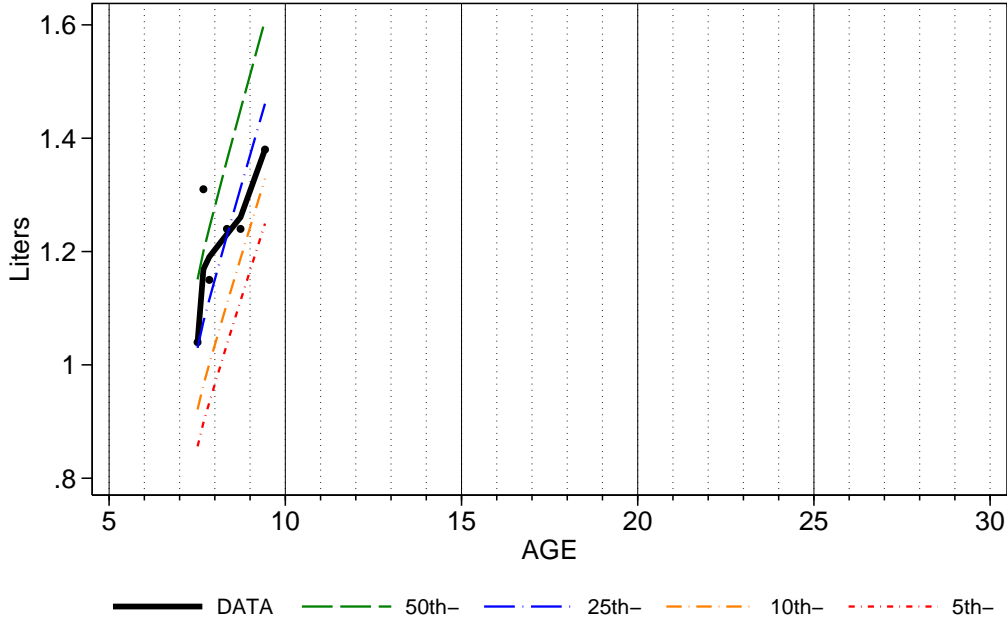

1200

**PATTERN OF GROWTH/DECLINE (Check One)**

- ( 1 ) Normal Growth
- ( 2 ) Normal Growth, Early Decline
- ( 3 ) Reduced Growth
- ( 4 ) Reduced Growth, Early Decline
- ( 9 ) Undetermined Pattern
- ( 8 ) Undetermined - not enough data

Maximum lung growth attained: ( 1 ) Yes ( 0 ) No

Plateau started: ( 2 ) No plateau ( 1 ) Yes ( 0 ) No

Decline started: ( 1 ) Yes ( 0 ) No

AGE AT each of the following periods (use '99' if N/A):

Maximum Lung Growth: \_\_\_\_ . \_\_\_\_

Start of Plateau: \_\_\_\_ . \_\_\_\_

Start of Decline: \_\_\_\_ . \_\_\_\_

### Pre-BD FEV1 Data and Percentiles: 1223

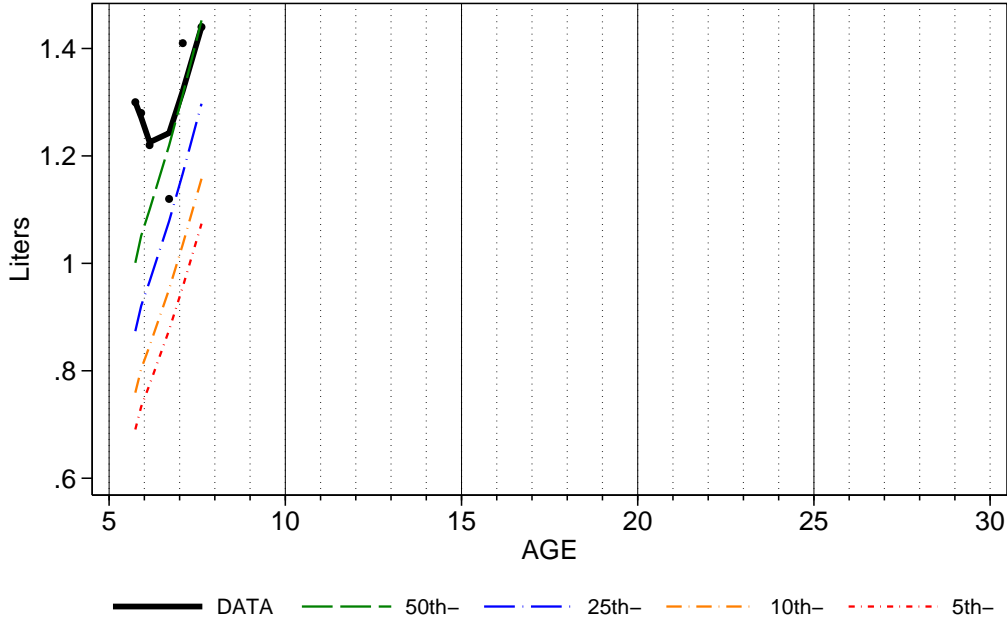

1223

**PATTERN OF GROWTH/DECLINE (Check One)**

- ( 1 ) Normal Growth
- ( 2 ) Normal Growth, Early Decline
- ( 3 ) Reduced Growth
- ( 4 ) Reduced Growth, Early Decline
- ( 9 ) Undetermined Pattern
- ( 8 ) Undetermined - not enough data

Maximum lung growth attained: ( 1 ) Yes ( 0 ) No

Plateau started: ( 2 ) No plateau ( 1 ) Yes ( 0 ) No

Decline started: ( 1 ) Yes ( 0 ) No

AGE AT each of the following periods (use '99' if N/A):

Maximum Lung Growth: \_\_\_\_ . \_\_\_\_

Start of Plateau: \_\_\_\_ . \_\_\_\_

Start of Decline: \_\_\_\_ . \_\_\_\_

### Pre-BD FEV1 Data and Percentiles: 1242

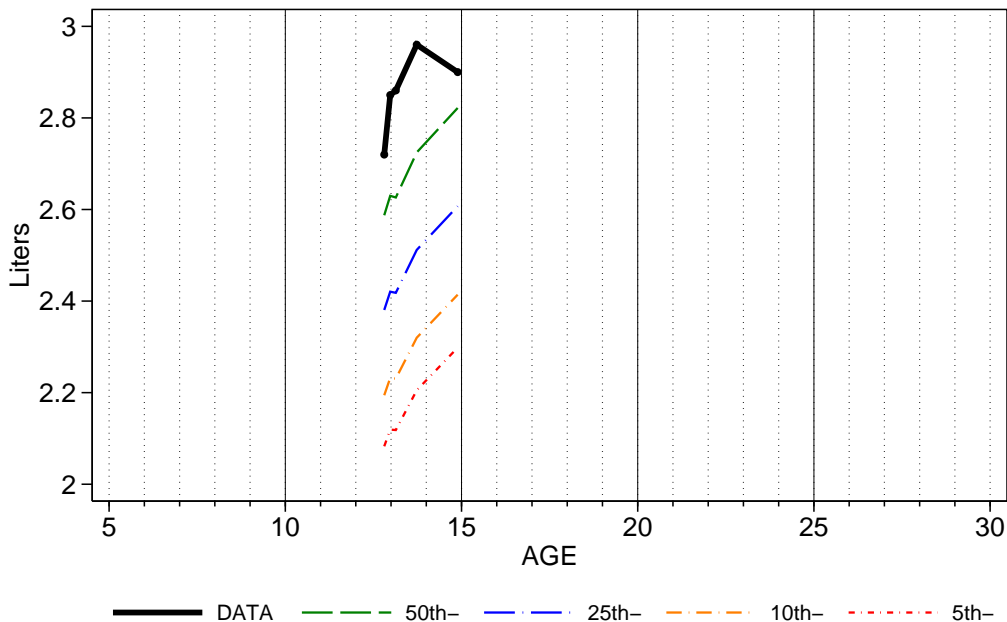

1242

**PATTERN OF GROWTH/DECLINE (Check One)**

- ( 1 ) Normal Growth
- ( 2 ) Normal Growth, Early Decline
- ( 3 ) Reduced Growth
- ( 4 ) Reduced Growth, Early Decline
- ( 9 ) Undetermined Pattern
- ( 8 ) Undetermined - not enough data

Maximum lung growth attained: ( 1 ) Yes ( 0 ) No

Plateau started: ( 2 ) No plateau ( 1 ) Yes ( 0 ) No

Decline started: ( 1 ) Yes ( 0 ) No

AGE AT each of the following periods (use '99' if N/A):

Maximum Lung Growth: \_\_\_\_ . \_\_\_\_

Start of Plateau: \_\_\_\_ . \_\_\_\_

Start of Decline: \_\_\_\_ . \_\_\_\_

### Pre-BD FEV1 Data and Percentiles: 1261

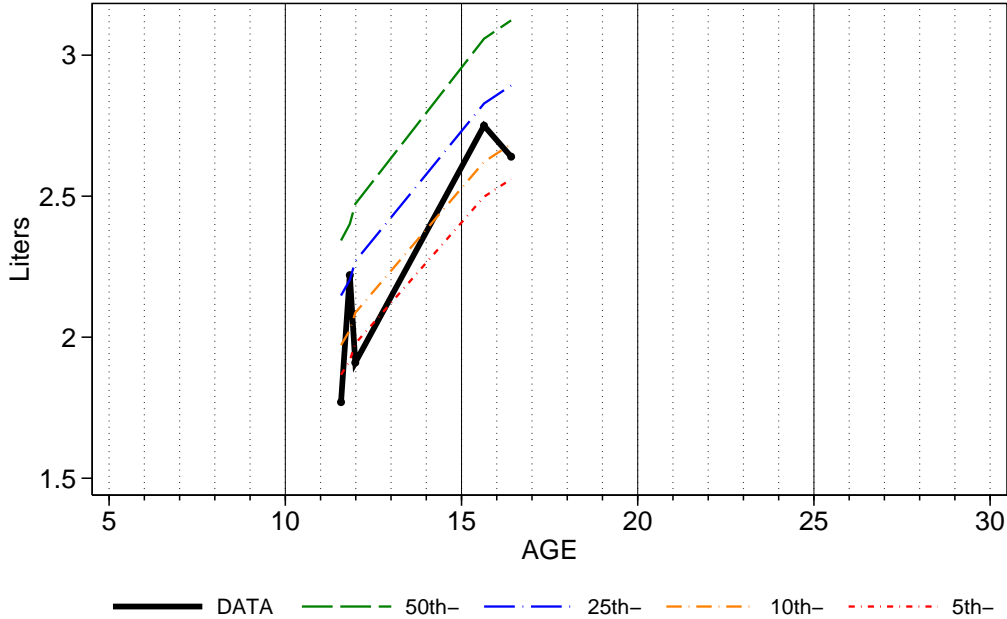

1261

**PATTERN OF GROWTH/DECLINE (Check One)**

- ( 1) Normal Growth
- ( 2) Normal Growth, Early Decline
- ( 3) Reduced Growth
- ( 4) Reduced Growth, Early Decline
- ( 9) Undetermined Pattern
- ( 8) Undetermined - not enough data

Maximum lung growth attained: ( 1) Yes ( 0) No

Plateau started: ( 2) No plateau ( 1) Yes ( 0) No

Decline started: ( 1) Yes ( 0) No

AGE AT each of the following periods (use '99' if N/A):

Maximum Lung Growth: \_\_\_\_ . \_\_\_\_

Start of Plateau: \_\_\_\_ . \_\_\_\_

Start of Decline: \_\_\_\_ . \_\_\_\_

### Pre-BD FEV1 Data and Percentiles: 1264

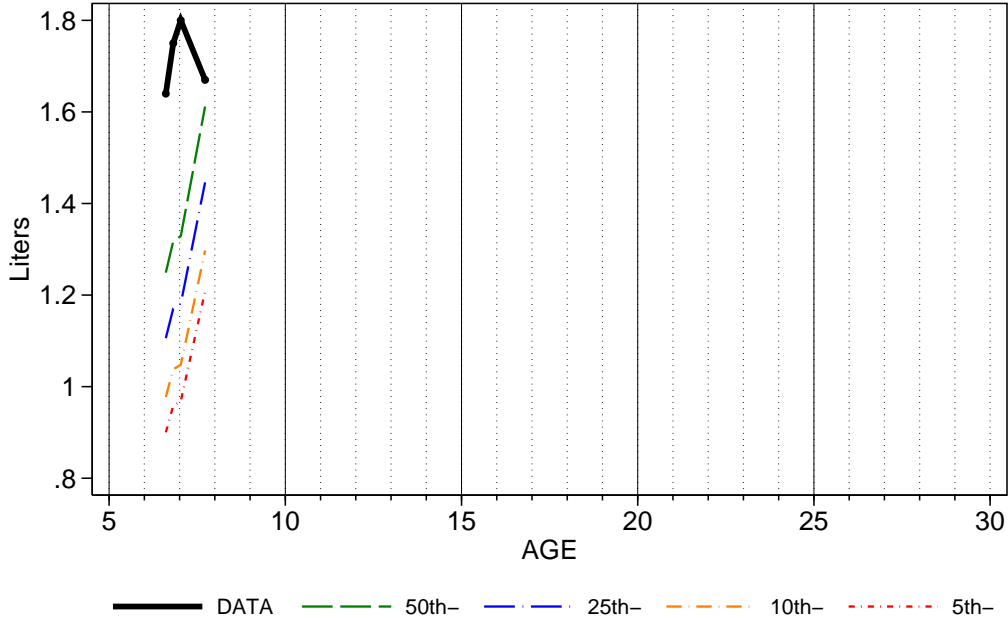

1264

**PATTERN OF GROWTH/DECLINE (Check One)**

- ( 1) Normal Growth
- ( 2) Normal Growth, Early Decline
- ( 3) Reduced Growth
- ( 4) Reduced Growth, Early Decline
- ( 9) Undetermined Pattern
- ( 8) Undetermined - not enough data

Maximum lung growth attained: ( 1) Yes ( 0) No

Plateau started: ( 2) No plateau ( 1) Yes ( 0) No

Decline started: ( 1) Yes ( 0) No

AGE AT each of the following periods (use '99' if N/A):

Maximum Lung Growth: \_\_\_\_ . \_\_\_\_

Start of Plateau: \_\_\_\_ . \_\_\_\_

Start of Decline: \_\_\_\_ . \_\_\_\_



### Pre-BD FEV1 Data and Percentiles: 1265

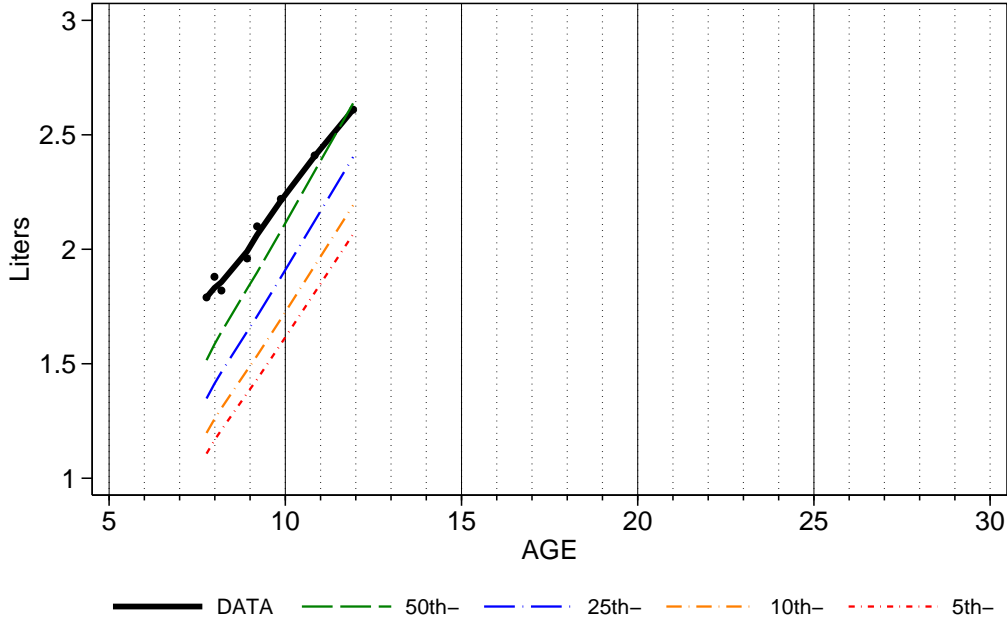

1265

**PATTERN OF GROWTH/DECLINE (Check One)**

- ( 1 ) Normal Growth
- ( 2 ) Normal Growth, Early Decline
- ( 3 ) Reduced Growth
- ( 4 ) Reduced Growth, Early Decline
- ( 9 ) Undetermined Pattern
- ( 8 ) Undetermined - not enough data

Maximum lung growth attained: ( 1 ) Yes ( 0 ) No

Plateau started: ( 2 ) No plateau ( 1 ) Yes ( 0 ) No

Decline started: ( 1 ) Yes ( 0 ) No

AGE AT each of the following periods (use '99' if N/A):

Maximum Lung Growth: \_\_\_\_ . \_\_\_\_

Start of Plateau: \_\_\_\_ . \_\_\_\_

Start of Decline: \_\_\_\_ . \_\_\_\_

### Pre-BD FEV1 Data and Percentiles: 1328

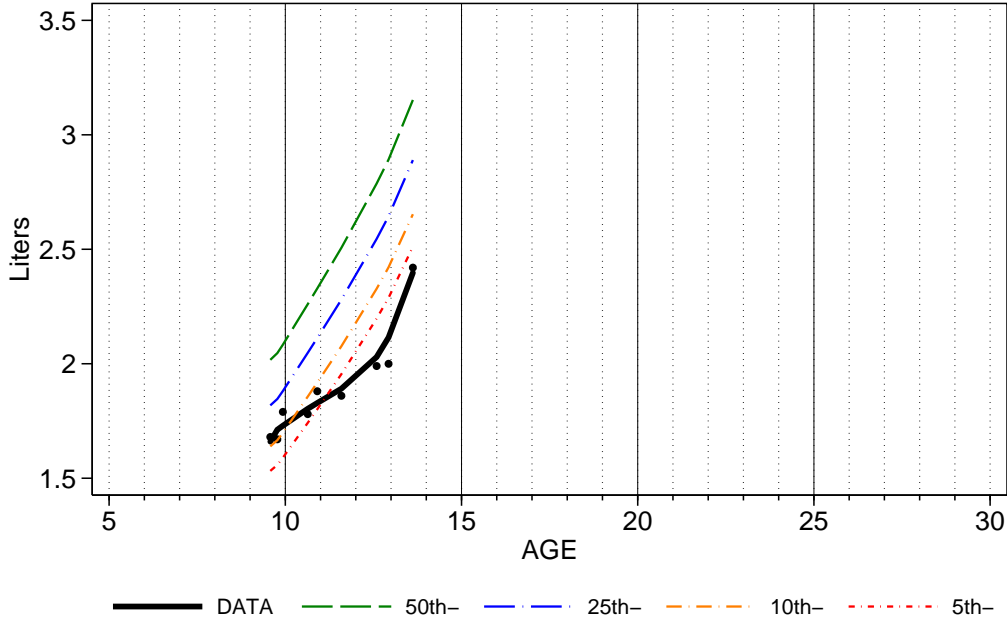

1328

**PATTERN OF GROWTH/DECLINE (Check One)**

- ( 1 ) Normal Growth
- ( 2 ) Normal Growth, Early Decline
- ( 3 ) Reduced Growth
- ( 4 ) Reduced Growth, Early Decline
- ( 9 ) Undetermined Pattern
- ( 8 ) Undetermined - not enough data

Maximum lung growth attained: ( 1 ) Yes ( 0 ) No

Plateau started: ( 2 ) No plateau ( 1 ) Yes ( 0 ) No

Decline started: ( 1 ) Yes ( 0 ) No

AGE AT each of the following periods (use '99' if N/A):

Maximum Lung Growth: \_\_\_\_ . \_\_\_\_

Start of Plateau: \_\_\_\_ . \_\_\_\_

Start of Decline: \_\_\_\_ . \_\_\_\_

### Pre-BD FEV1 Data and Percentiles: 1352

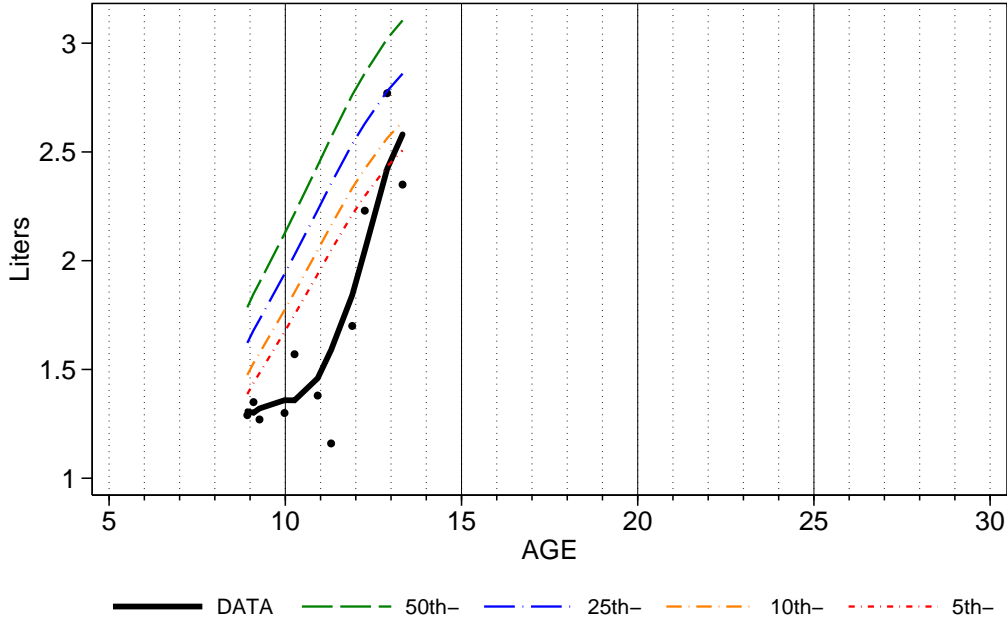

1352

**PATTERN OF GROWTH/DECLINE (Check One)**

- ( 1 ) Normal Growth
- ( 2 ) Normal Growth, Early Decline
- ( 3 ) Reduced Growth
- ( 4 ) Reduced Growth, Early Decline
- ( 9 ) Undetermined Pattern
- ( 8 ) Undetermined - not enough data

Maximum lung growth attained: ( 1 ) Yes ( 0 ) No

Plateau started: ( 2 ) No plateau ( 1 ) Yes ( 0 ) No

Decline started: ( 1 ) Yes ( 0 ) No

AGE AT each of the following periods (use '99' if N/A):

Maximum Lung Growth: \_\_\_\_ . \_\_\_\_

Start of Plateau: \_\_\_\_ . \_\_\_\_

Start of Decline: \_\_\_\_ . \_\_\_\_

### Pre-BD FEV1 Data and Percentiles: 1389

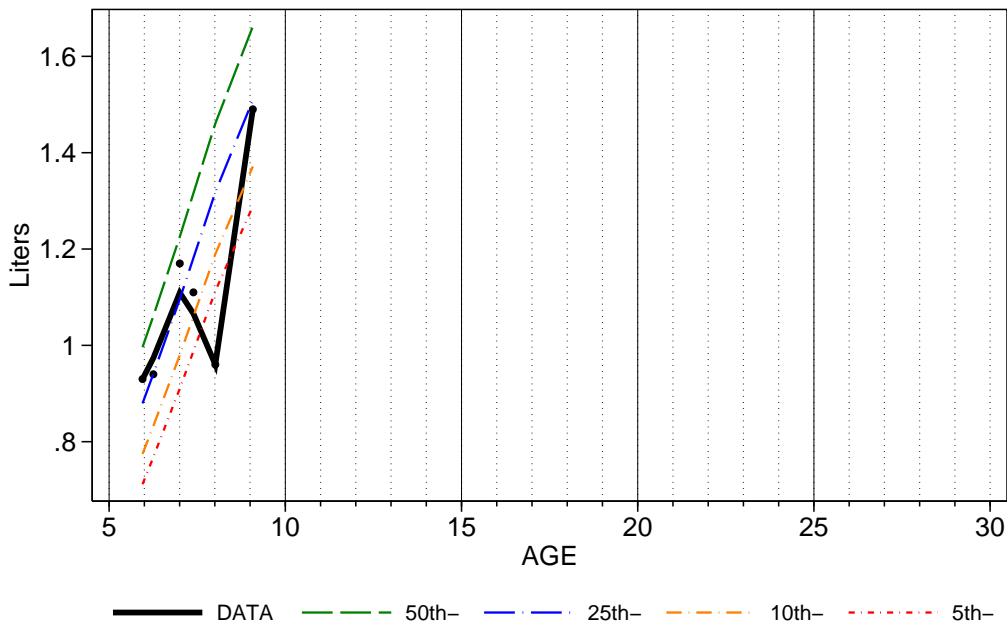

1389

**PATTERN OF GROWTH/DECLINE (Check One)**

- ( 1 ) Normal Growth
- ( 2 ) Normal Growth, Early Decline
- ( 3 ) Reduced Growth
- ( 4 ) Reduced Growth, Early Decline
- ( 9 ) Undetermined Pattern
- ( 8 ) Undetermined - not enough data

Maximum lung growth attained: ( 1 ) Yes ( 0 ) No

Plateau started: ( 2 ) No plateau ( 1 ) Yes ( 0 ) No

Decline started: ( 1 ) Yes ( 0 ) No

AGE AT each of the following periods (use '99' if N/A):

Maximum Lung Growth: \_\_\_\_ . \_\_\_\_

Start of Plateau: \_\_\_\_ . \_\_\_\_

Start of Decline: \_\_\_\_ . \_\_\_\_

### Pre-BD FEV1 Data and Percentiles: 1411

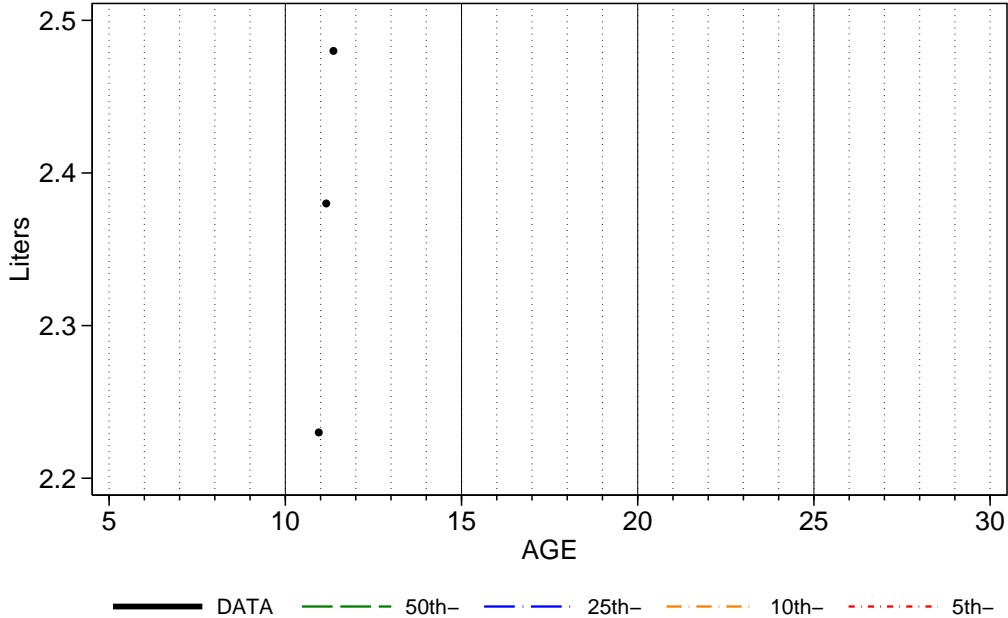

1411

**PATTERN OF GROWTH/DECLINE (Check One)**

- ( 1) Normal Growth
- ( 2) Normal Growth, Early Decline
- ( 3) Reduced Growth
- ( 4) Reduced Growth, Early Decline
- ( 9) Undetermined Pattern
- ( 8) Undetermined - not enough data

Maximum lung growth attained: ( 1) Yes ( 0) No

Plateau started: ( 2) No plateau ( 1) Yes ( 0) No

Decline started: ( 1) Yes ( 0) No

AGE AT each of the following periods (use '99' if N/A):

Maximum Lung Growth: \_\_\_\_ . \_\_\_\_

Start of Plateau: \_\_\_\_ . \_\_\_\_

Start of Decline: \_\_\_\_ . \_\_\_\_

### Pre-BD FEV1 Data and Percentiles: 1428

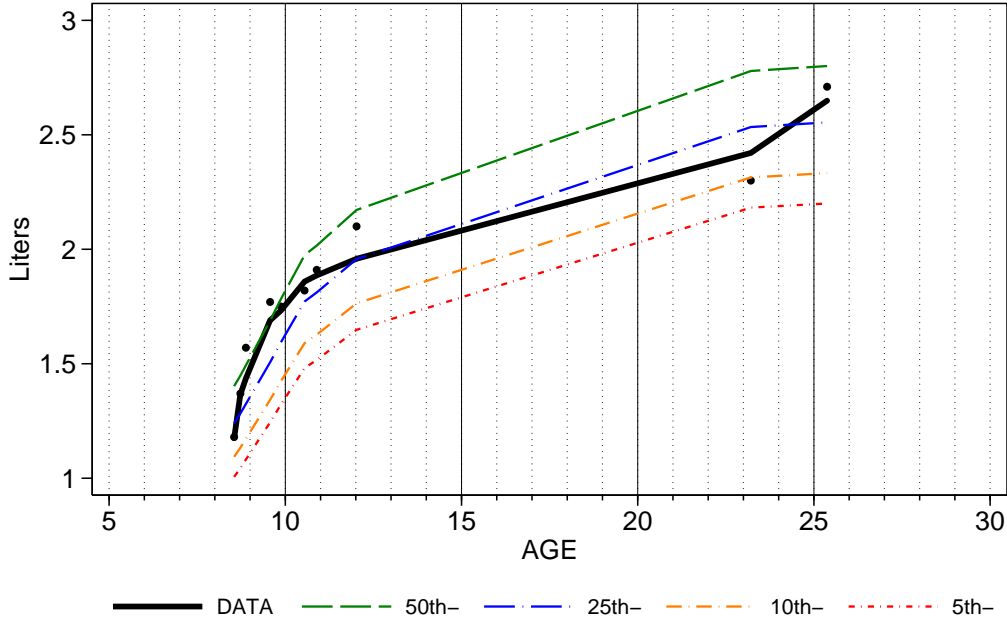

1428

**PATTERN OF GROWTH/DECLINE (Check One)**

- ( 1 ) Normal Growth
- ( 2 ) Normal Growth, Early Decline
- ( 3 ) Reduced Growth
- ( 4 ) Reduced Growth, Early Decline
- ( 9 ) Undetermined Pattern
- ( 8 ) Undetermined - not enough data

Maximum lung growth attained: ( 1 ) Yes ( 0 ) No

Plateau started: ( 2 ) No plateau ( 1 ) Yes ( 0 ) No

Decline started: ( 1 ) Yes ( 0 ) No

AGE AT each of the following periods (use '99' if N/A):

Maximum Lung Growth: \_\_\_\_ . \_\_\_\_

Start of Plateau: \_\_\_\_ . \_\_\_\_

Start of Decline: \_\_\_\_ . \_\_\_\_

### Pre-BD FEV1 Data and Percentiles: 1434

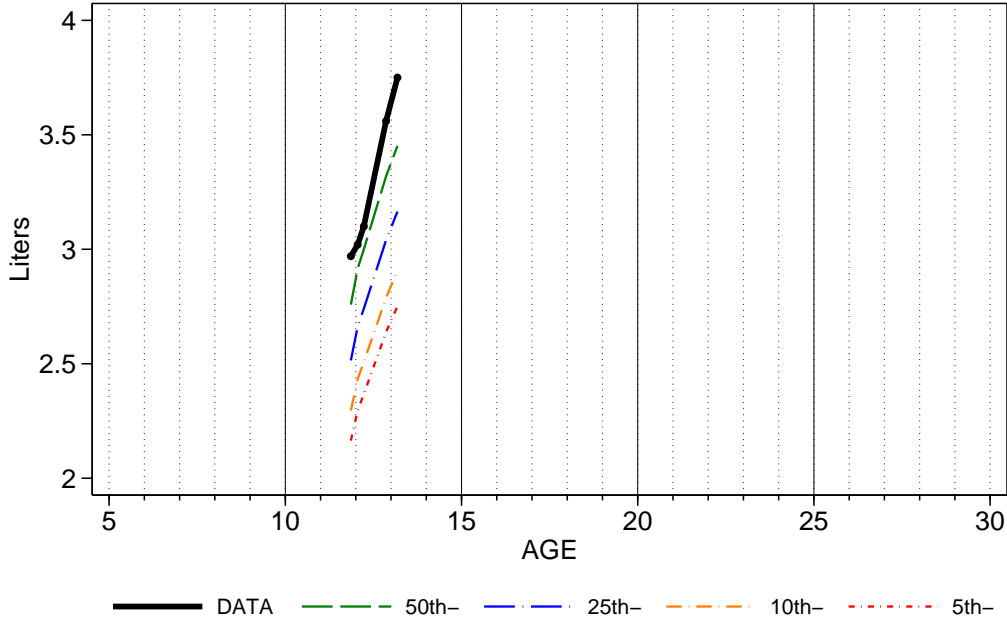

1434

**PATTERN OF GROWTH/DECLINE (Check One)**

- ( 1) Normal Growth
- ( 2) Normal Growth, Early Decline
- ( 3) Reduced Growth
- ( 4) Reduced Growth, Early Decline
- ( 9) Undetermined Pattern
- ( 8) Undetermined - not enough data

Maximum lung growth attained: ( 1) Yes ( 0) No

Plateau started: ( 2) No plateau ( 1) Yes ( 0) No

Decline started: ( 1) Yes ( 0) No

AGE AT each of the following periods (use '99' if N/A):

Maximum Lung Growth: \_\_\_\_ . \_\_\_\_

Start of Plateau: \_\_\_\_ . \_\_\_\_

Start of Decline: \_\_\_\_ . \_\_\_\_

### Pre-BD FEV1 Data and Percentiles: 1481

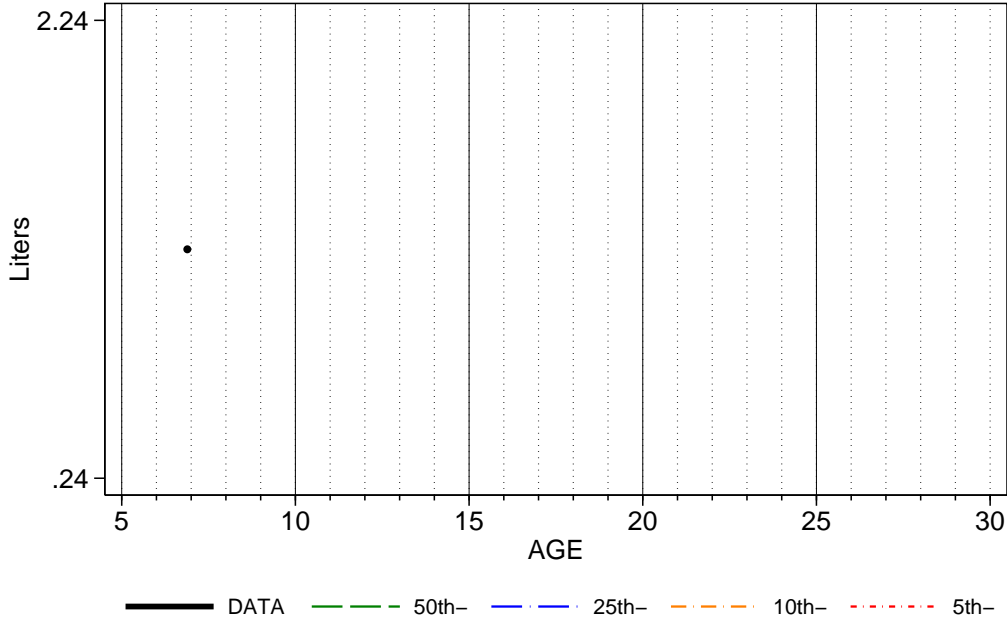

1481

**PATTERN OF GROWTH/DECLINE (Check One)**

- ( 1) Normal Growth
- ( 2) Normal Growth, Early Decline
- ( 3) Reduced Growth
- ( 4) Reduced Growth, Early Decline
- ( 9) Undetermined Pattern
- ( 8) Undetermined - not enough data

Maximum lung growth attained: ( 1) Yes ( 0) No

Plateau started: ( 2) No plateau ( 1) Yes ( 0) No

Decline started: ( 1) Yes ( 0) No

AGE AT each of the following periods (use '99' if N/A):

Maximum Lung Growth: \_\_\_\_ . \_\_\_\_

Start of Plateau: \_\_\_\_ . \_\_\_\_

Start of Decline: \_\_\_\_ . \_\_\_\_



### Pre-BD FEV1 Data and Percentiles: 1486

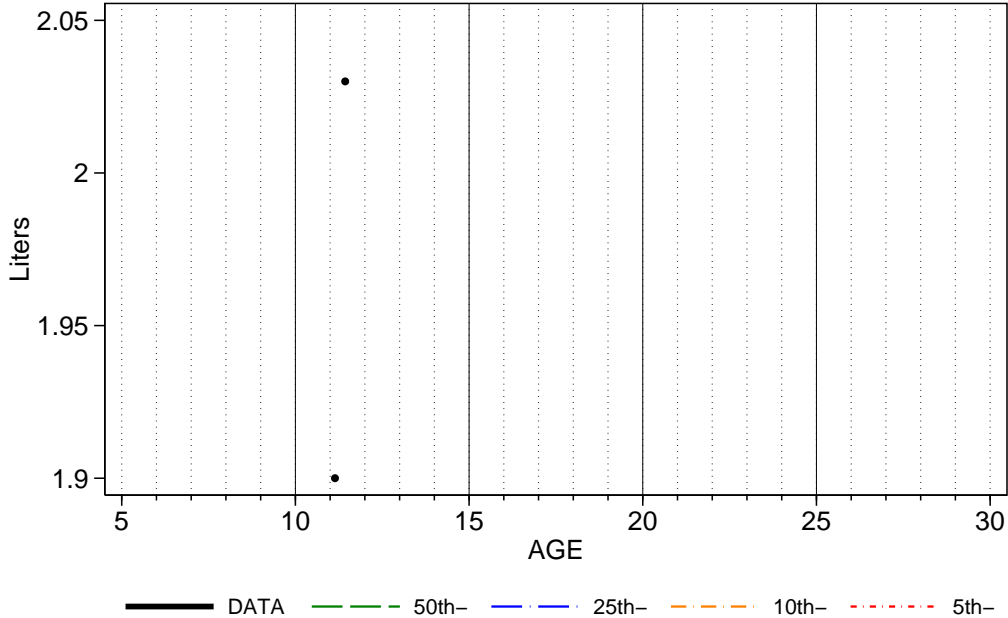

1486

**PATTERN OF GROWTH/DECLINE (Check One)**

- ( 1) Normal Growth
- ( 2) Normal Growth, Early Decline
- ( 3) Reduced Growth
- ( 4) Reduced Growth, Early Decline
- ( 9) Undetermined Pattern
- ( 8) Undetermined - not enough data

Maximum lung growth attained: ( 1) Yes ( 0) No

Plateau started: ( 2) No plateau ( 1) Yes ( 0) No

Decline started: ( 1) Yes ( 0) No

AGE AT each of the following periods (use '99' if N/A):

Maximum Lung Growth: \_\_\_\_ . \_\_\_\_

Start of Plateau: \_\_\_\_ . \_\_\_\_

Start of Decline: \_\_\_\_ . \_\_\_\_

### Pre-BD FEV1 Data and Percentiles: 1497

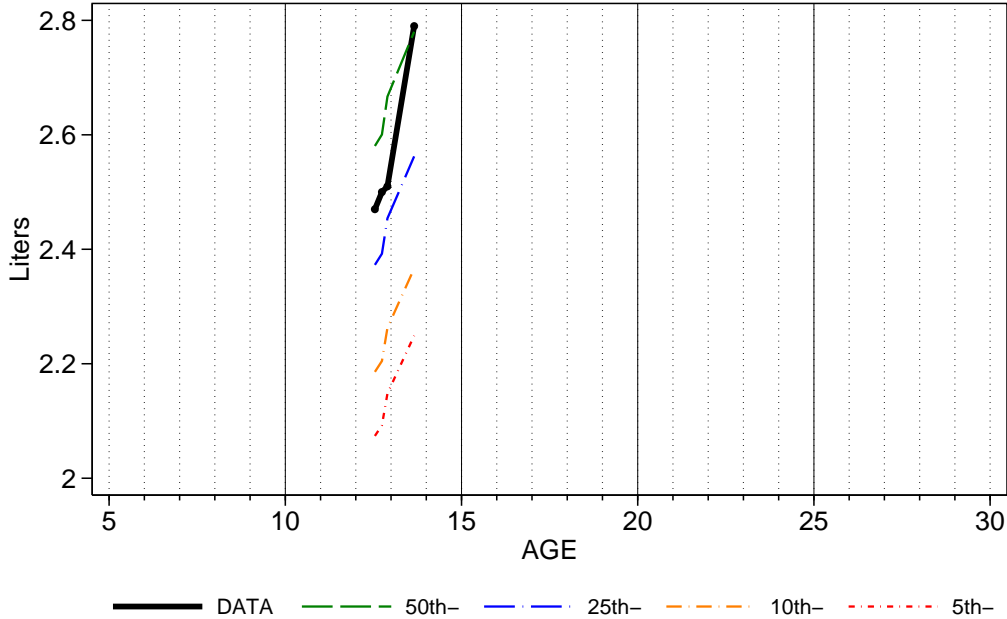

1497

**PATTERN OF GROWTH/DECLINE (Check One)**

- ( 1) Normal Growth
- ( 2) Normal Growth, Early Decline
- ( 3) Reduced Growth
- ( 4) Reduced Growth, Early Decline
- ( 9) Undetermined Pattern
- ( 8) Undetermined - not enough data

Maximum lung growth attained: ( 1) Yes ( 0) No

Plateau started: ( 2) No plateau ( 1) Yes ( 0) No

Decline started: ( 1) Yes ( 0) No

AGE AT each of the following periods (use '99' if N/A):

Maximum Lung Growth: \_\_\_\_ . \_\_\_\_

Start of Plateau: \_\_\_\_ . \_\_\_\_

Start of Decline: \_\_\_\_ . \_\_\_\_

### Pre-BD FEV1 Data and Percentiles: 1506

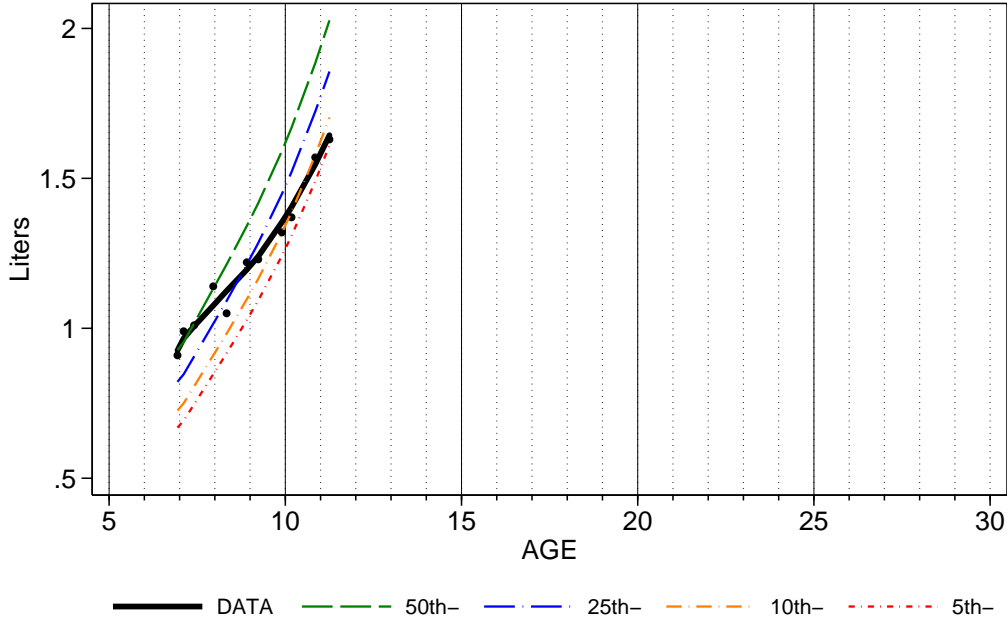

1506

**PATTERN OF GROWTH/DECLINE (Check One)**

- ( 1) Normal Growth
- ( 2) Normal Growth, Early Decline
- ( 3) Reduced Growth
- ( 4) Reduced Growth, Early Decline
- ( 9) Undetermined Pattern
- ( 8) Undetermined - not enough data

Maximum lung growth attained: ( 1) Yes ( 0) No

Plateau started: ( 2) No plateau ( 1) Yes ( 0) No

Decline started: ( 1) Yes ( 0) No

AGE AT each of the following periods (use '99' if N/A):

Maximum Lung Growth: \_\_\_\_ . \_\_\_\_

Start of Plateau: \_\_\_\_ . \_\_\_\_

Start of Decline: \_\_\_\_ . \_\_\_\_

### Pre-BD FEV1 Data and Percentiles: 1526

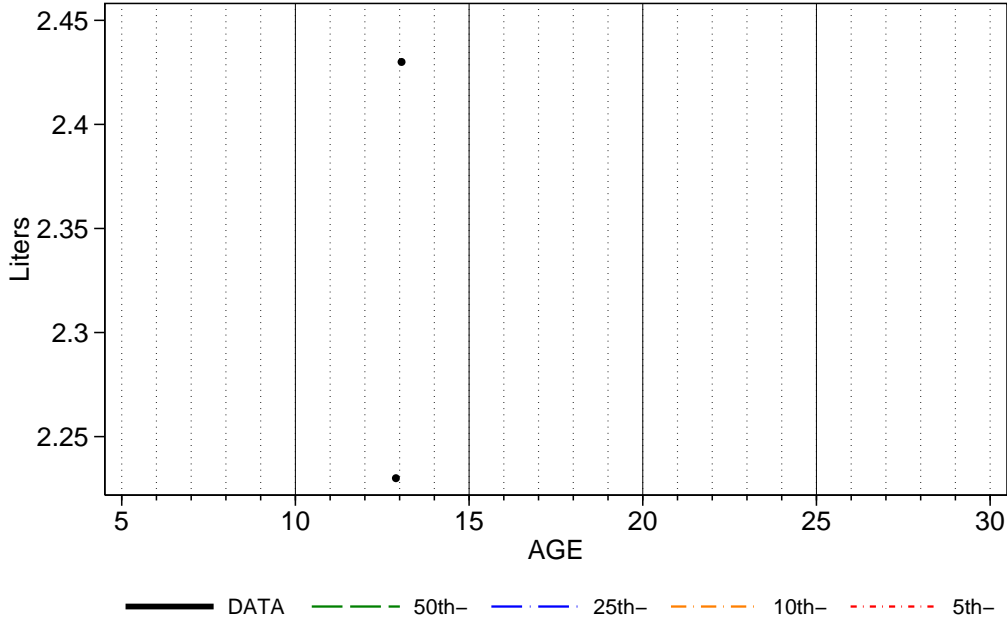

1526

**PATTERN OF GROWTH/DECLINE (Check One)**

- ( 1) Normal Growth
- ( 2) Normal Growth, Early Decline
- ( 3) Reduced Growth
- ( 4) Reduced Growth, Early Decline
- ( 9) Undetermined Pattern
- ( 8) Undetermined - not enough data

Maximum lung growth attained: ( 1) Yes ( 0) No

Plateau started: ( 2) No plateau ( 1) Yes ( 0) No

Decline started: ( 1) Yes ( 0) No

AGE AT each of the following periods (use '99' if N/A):

Maximum Lung Growth: \_\_\_\_ . \_\_\_\_

Start of Plateau: \_\_\_\_ . \_\_\_\_

Start of Decline: \_\_\_\_ . \_\_\_\_

Pre-BD FEV1 Data and Percentiles: 1536

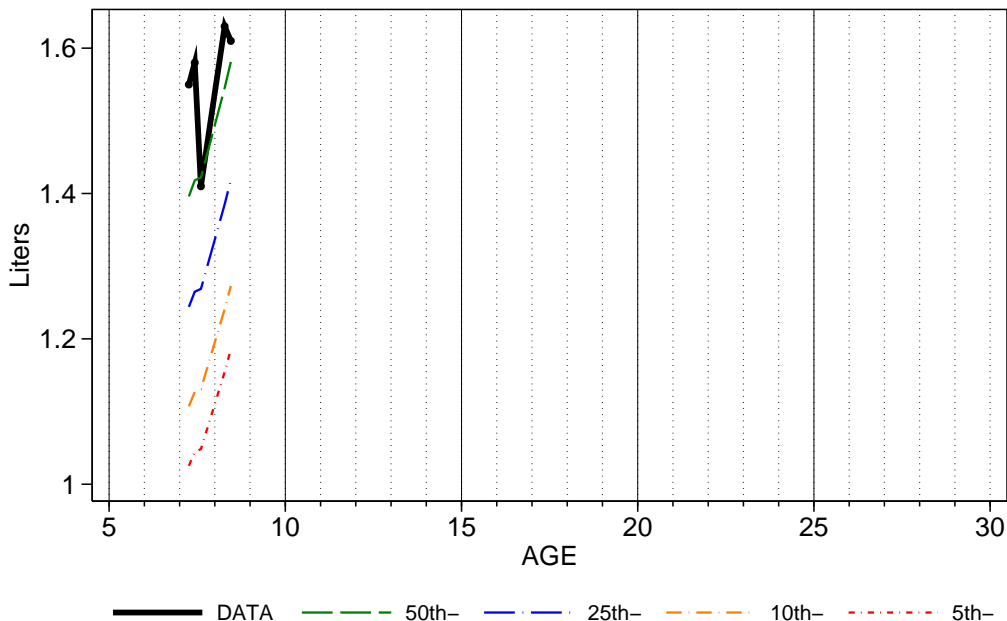

1536

PATTERN OF GROWTH/DECLINE (Check One)

- ( 1) Normal Growth
- ( 2) Normal Growth, Early Decline
- ( 3) Reduced Growth
- ( 4) Reduced Growth, Early Decline
- ( 9) Undetermined Pattern
- ( 8) Undetermined - not enough data

Maximum lung growth attained: ( 1) Yes ( 0) No

Plateau started: ( 2) No plateau ( 1) Yes ( 0) No

Decline started: ( 1) Yes ( 0) No

AGE AT each of the following periods (use '99' if N/A):

Maximum Lung Growth: \_\_\_\_ . \_\_\_\_

Start of Plateau: \_\_\_\_ . \_\_\_\_

Start of Decline: \_\_\_\_ . \_\_\_\_

### Pre-BD FEV1 Data and Percentiles: 1552

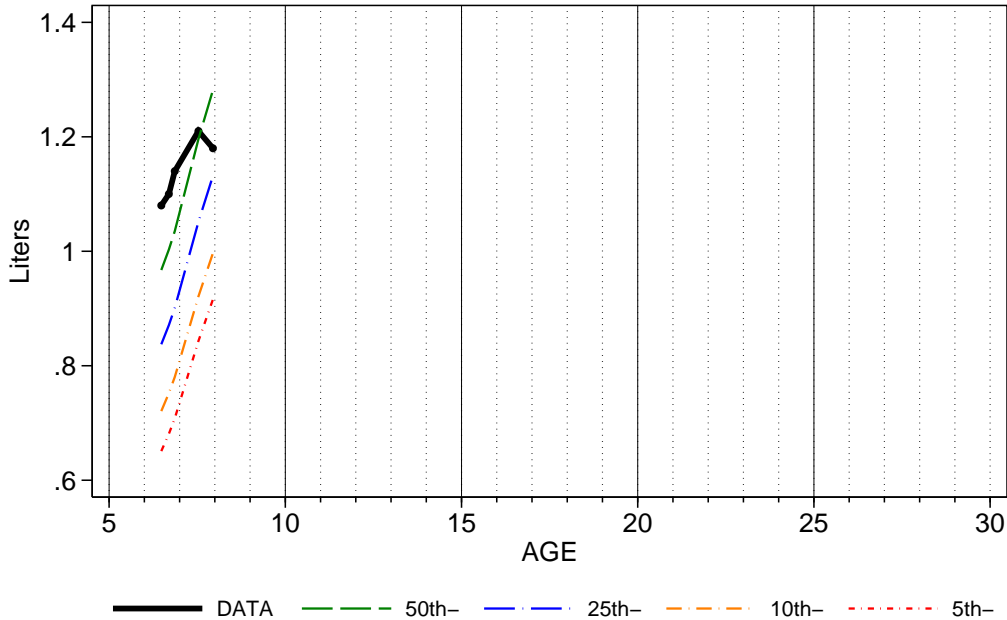

1552

**PATTERN OF GROWTH/DECLINE (Check One)**

- ( 1) Normal Growth
- ( 2) Normal Growth, Early Decline
- ( 3) Reduced Growth
- ( 4) Reduced Growth, Early Decline
- ( 9) Undetermined Pattern
- ( 8) Undetermined - not enough data

Maximum lung growth attained: ( 1) Yes ( 0) No

Plateau started: ( 2) No plateau ( 1) Yes ( 0) No

Decline started: ( 1) Yes ( 0) No

AGE AT each of the following periods (use '99' if N/A):

Maximum Lung Growth: \_\_\_\_ . \_\_\_\_

Start of Plateau: \_\_\_\_ . \_\_\_\_

Start of Decline: \_\_\_\_ . \_\_\_\_

### Pre-BD FEV1 Data and Percentiles: 1563

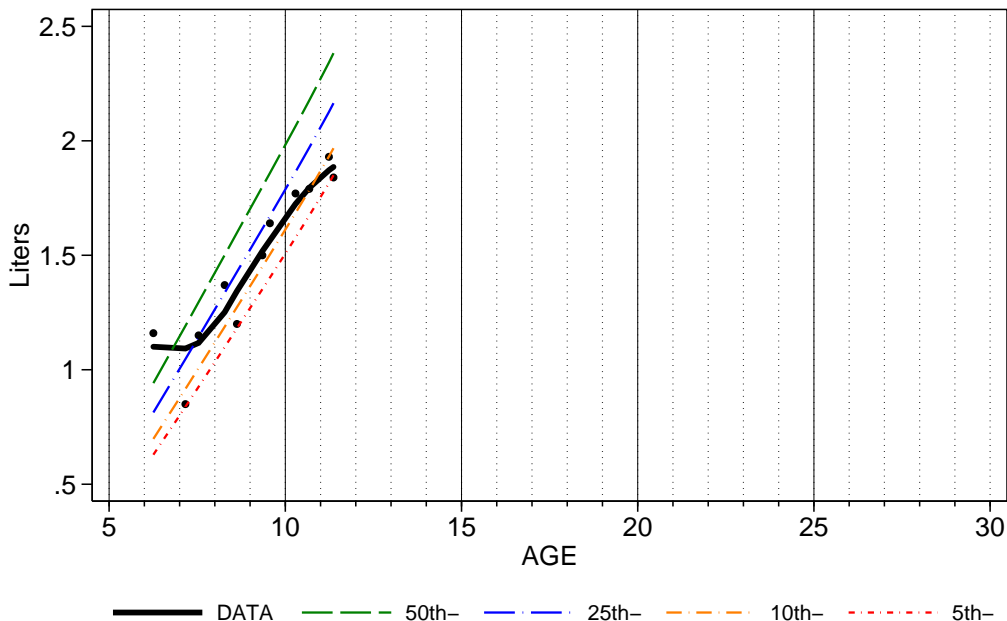

1563

**PATTERN OF GROWTH/DECLINE (Check One)**

- ( 1 ) Normal Growth
- ( 2 ) Normal Growth, Early Decline
- ( 3 ) Reduced Growth
- ( 4 ) Reduced Growth, Early Decline
- ( 9 ) Undetermined Pattern
- ( 8 ) Undetermined - not enough data

Maximum lung growth attained: ( 1 ) Yes ( 0 ) No

Plateau started: ( 2 ) No plateau ( 1 ) Yes ( 0 ) No

Decline started: ( 1 ) Yes ( 0 ) No

AGE AT each of the following periods (use '99' if N/A):

Maximum Lung Growth: \_\_\_\_ . \_\_\_\_

Start of Plateau: \_\_\_\_ . \_\_\_\_

Start of Decline: \_\_\_\_ . \_\_\_\_

### Pre-BD FEV1 Data and Percentiles: 1587

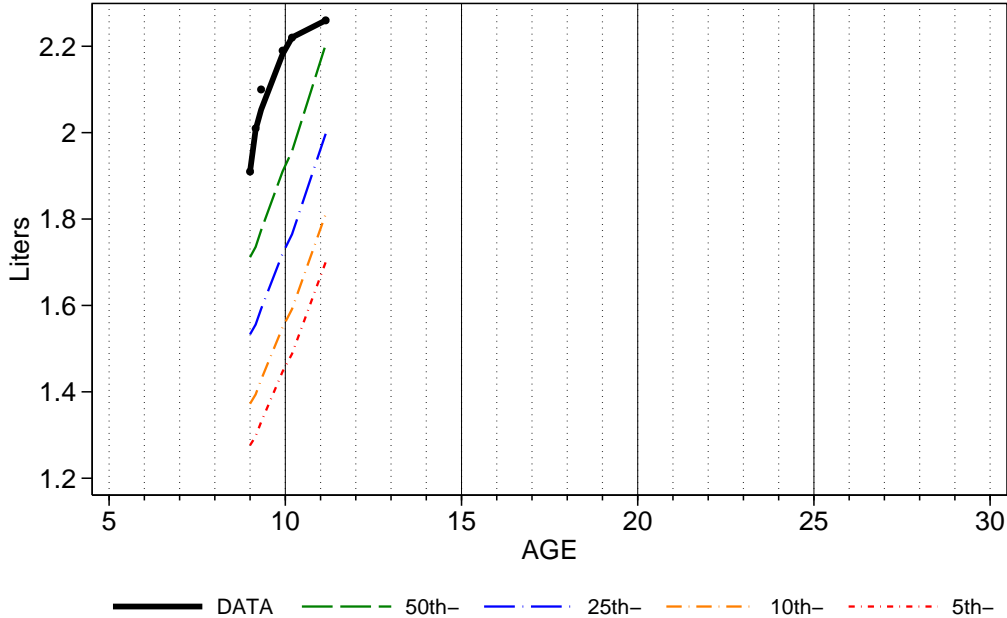

1587

**PATTERN OF GROWTH/DECLINE (Check One)**

- ( 1) Normal Growth
- ( 2) Normal Growth, Early Decline
- ( 3) Reduced Growth
- ( 4) Reduced Growth, Early Decline
- ( 9) Undetermined Pattern
- ( 8) Undetermined - not enough data

Maximum lung growth attained: ( 1) Yes ( 0) No

Plateau started: ( 2) No plateau ( 1) Yes ( 0) No

Decline started: ( 1) Yes ( 0) No

AGE AT each of the following periods (use '99' if N/A):

Maximum Lung Growth: \_\_\_\_ . \_\_\_\_

Start of Plateau: \_\_\_\_ . \_\_\_\_

Start of Decline: \_\_\_\_ . \_\_\_\_



### Pre-BD FEV1 Data and Percentiles: 1612

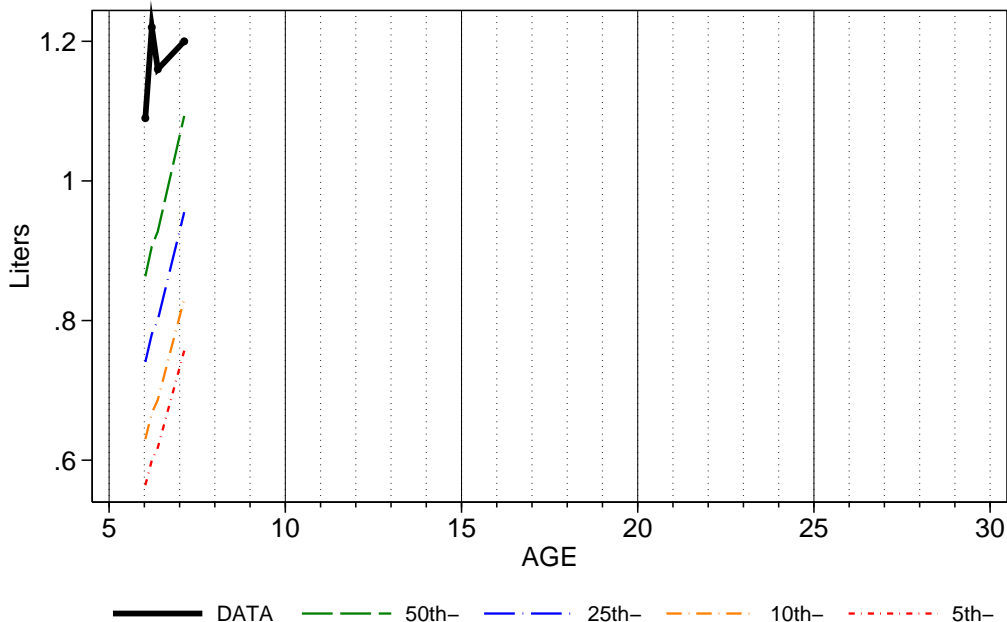

1612

**PATTERN OF GROWTH/DECLINE (Check One)**

- ( 1) Normal Growth
- ( 2) Normal Growth, Early Decline
- ( 3) Reduced Growth
- ( 4) Reduced Growth, Early Decline
- ( 9) Undetermined Pattern
- ( 8) Undetermined - not enough data

Maximum lung growth attained: ( 1) Yes ( 0) No

Plateau started: ( 2) No plateau ( 1) Yes ( 0) No

Decline started: ( 1) Yes ( 0) No

AGE AT each of the following periods (use '99' if N/A):

Maximum Lung Growth: \_\_\_\_ . \_\_\_\_

Start of Plateau: \_\_\_\_ . \_\_\_\_

Start of Decline: \_\_\_\_ . \_\_\_\_

### Pre-BD FEV1 Data and Percentiles: 1621

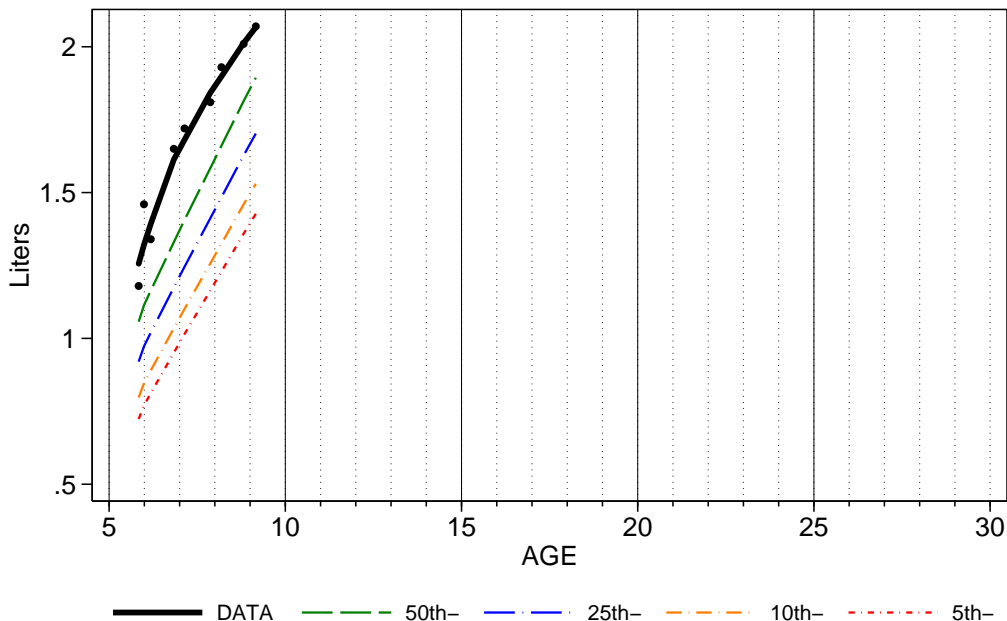

1621

**PATTERN OF GROWTH/DECLINE (Check One)**

- ( 1 ) Normal Growth
- ( 2 ) Normal Growth, Early Decline
- ( 3 ) Reduced Growth
- ( 4 ) Reduced Growth, Early Decline
- ( 9 ) Undetermined Pattern
- ( 8 ) Undetermined - not enough data

Maximum lung growth attained: ( 1 ) Yes ( 0 ) No

Plateau started: ( 2 ) No plateau ( 1 ) Yes ( 0 ) No

Decline started: ( 1 ) Yes ( 0 ) No

AGE AT each of the following periods (use '99' if N/A):

Maximum Lung Growth: \_\_\_\_ . \_\_\_\_

Start of Plateau: \_\_\_\_ . \_\_\_\_

Start of Decline: \_\_\_\_ . \_\_\_\_

### Pre-BD FEV1 Data and Percentiles: 1645

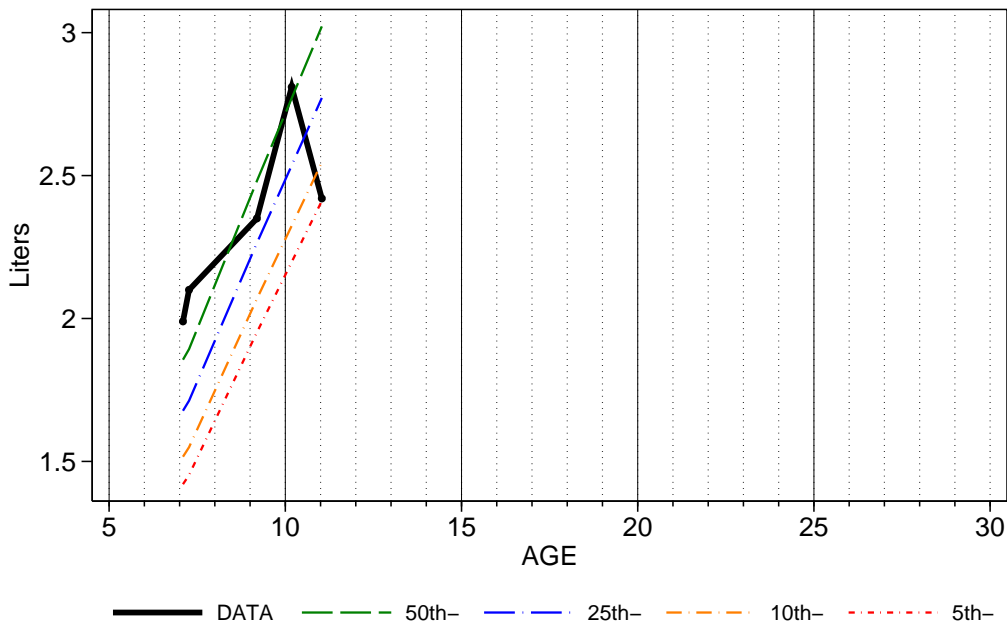

1645

**PATTERN OF GROWTH/DECLINE (Check One)**

- ( 1 ) Normal Growth
- ( 2 ) Normal Growth, Early Decline
- ( 3 ) Reduced Growth
- ( 4 ) Reduced Growth, Early Decline
- ( 9 ) Undetermined Pattern
- ( 8 ) Undetermined - not enough data

Maximum lung growth attained: ( 1 ) Yes ( 0 ) No

Plateau started: ( 2 ) No plateau ( 1 ) Yes ( 0 ) No

Decline started: ( 1 ) Yes ( 0 ) No

AGE AT each of the following periods (use '99' if N/A):

Maximum Lung Growth: \_\_\_\_ . \_\_\_\_

Start of Plateau: \_\_\_\_ . \_\_\_\_

Start of Decline: \_\_\_\_ . \_\_\_\_

### Pre-BD FEV1 Data and Percentiles: 1660

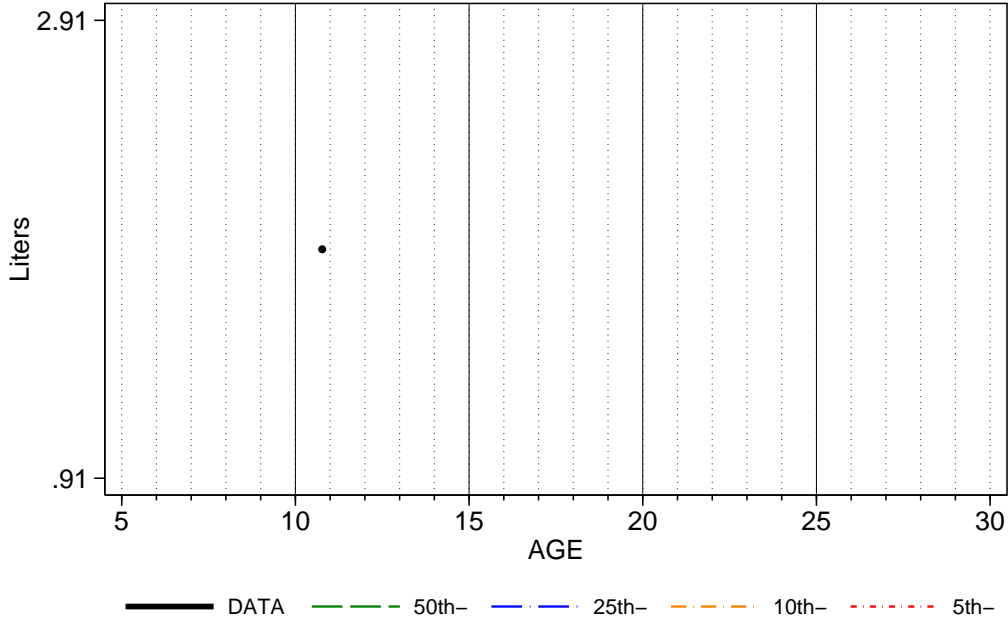

1660

**PATTERN OF GROWTH/DECLINE (Check One)**

- ( 1) Normal Growth
- ( 2) Normal Growth, Early Decline
- ( 3) Reduced Growth
- ( 4) Reduced Growth, Early Decline
- ( 9) Undetermined Pattern
- ( 8) Undetermined - not enough data

Maximum lung growth attained: ( 1) Yes ( 0) No

Plateau started: ( 2) No plateau ( 1) Yes ( 0) No

Decline started: ( 1) Yes ( 0) No

AGE AT each of the following periods (use '99' if N/A):

Maximum Lung Growth: \_\_\_\_ . \_\_\_\_

Start of Plateau: \_\_\_\_ . \_\_\_\_

Start of Decline: \_\_\_\_ . \_\_\_\_

### Pre-BD FEV1 Data and Percentiles: 1702

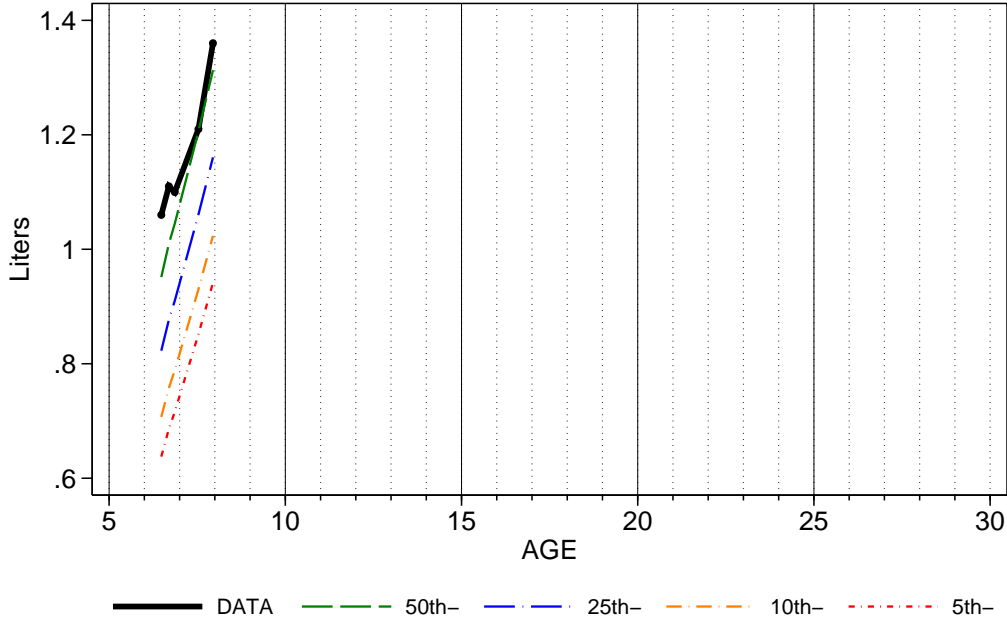

1702

**PATTERN OF GROWTH/DECLINE (Check One)**

- ( 1) Normal Growth
- ( 2) Normal Growth, Early Decline
- ( 3) Reduced Growth
- ( 4) Reduced Growth, Early Decline
- ( 9) Undetermined Pattern
- ( 8) Undetermined - not enough data

Maximum lung growth attained: ( 1) Yes ( 0) No

Plateau started: ( 2) No plateau ( 1) Yes ( 0) No

Decline started: ( 1) Yes ( 0) No

AGE AT each of the following periods (use '99' if N/A):

Maximum Lung Growth: \_\_\_\_ . \_\_\_\_

Start of Plateau: \_\_\_\_ . \_\_\_\_

Start of Decline: \_\_\_\_ . \_\_\_\_

### Pre-BD FEV1 Data and Percentiles: 1703

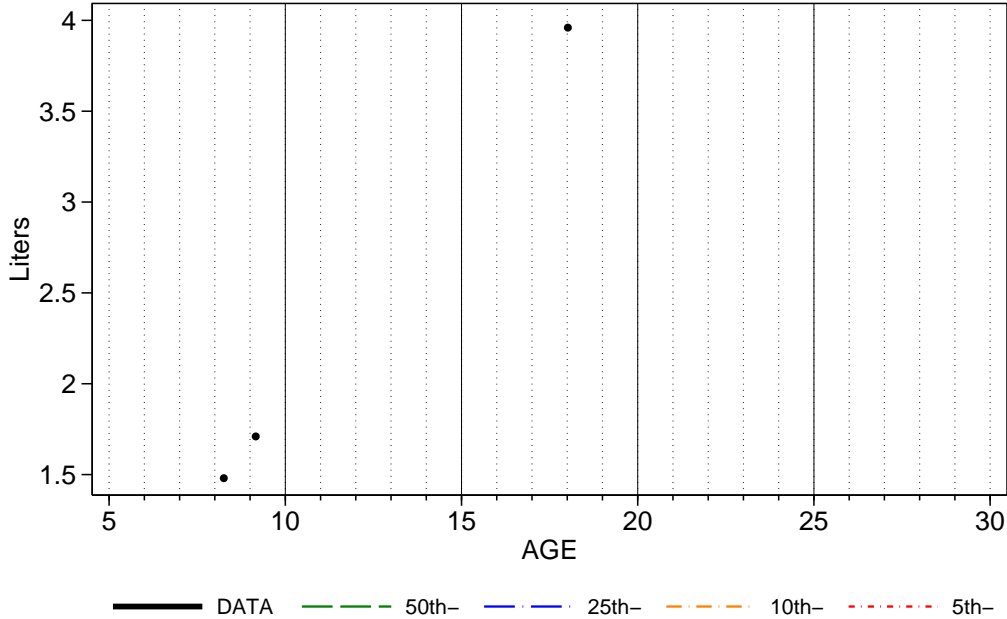

1703

**PATTERN OF GROWTH/DECLINE (Check One)**

- ( 1) Normal Growth
- ( 2) Normal Growth, Early Decline
- ( 3) Reduced Growth
- ( 4) Reduced Growth, Early Decline
- ( 9) Undetermined Pattern
- ( 8) Undetermined - not enough data

Maximum lung growth attained: ( 1) Yes ( 0) No

Plateau started: ( 2) No plateau ( 1) Yes ( 0) No

Decline started: ( 1) Yes ( 0) No

AGE AT each of the following periods (use '99' if N/A):

Maximum Lung Growth: \_\_\_\_ . \_\_\_\_

Start of Plateau: \_\_\_\_ . \_\_\_\_

Start of Decline: \_\_\_\_ . \_\_\_\_

### Pre-BD FEV1 Data and Percentiles: 1706

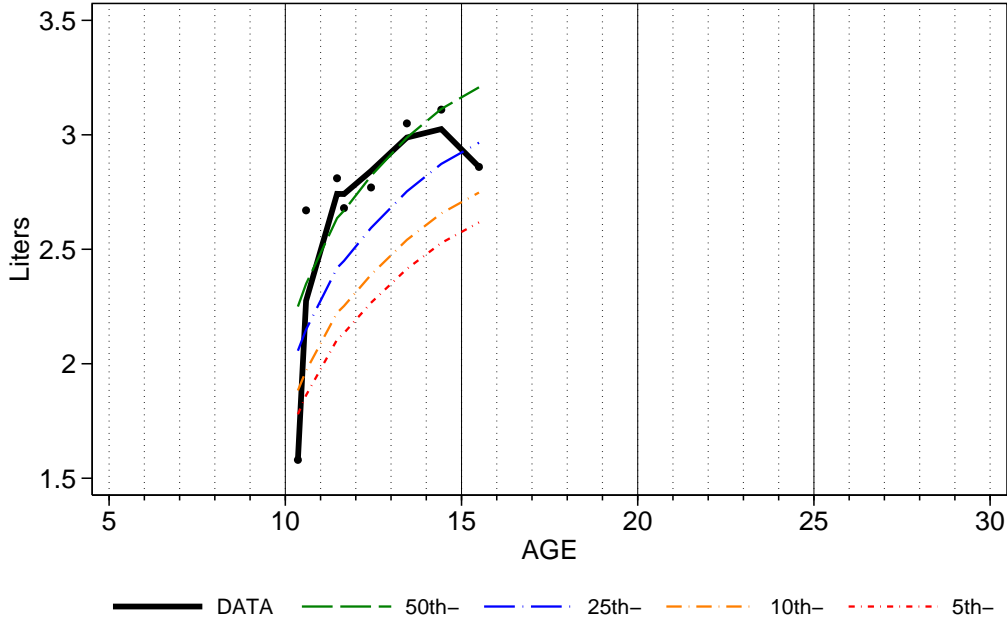

1706

**PATTERN OF GROWTH/DECLINE (Check One)**

- ( 1) Normal Growth
- ( 2) Normal Growth, Early Decline
- ( 3) Reduced Growth
- ( 4) Reduced Growth, Early Decline
- ( 9) Undetermined Pattern
- ( 8) Undetermined - not enough data

Maximum lung growth attained: ( 1) Yes ( 0) No

Plateau started: ( 2) No plateau ( 1) Yes ( 0) No

Decline started: ( 1) Yes ( 0) No

AGE AT each of the following periods (use '99' if N/A):

Maximum Lung Growth: \_\_\_\_ . \_\_\_\_

Start of Plateau: \_\_\_\_ . \_\_\_\_

Start of Decline: \_\_\_\_ . \_\_\_\_

### Pre-BD FEV1 Data and Percentiles: 1708

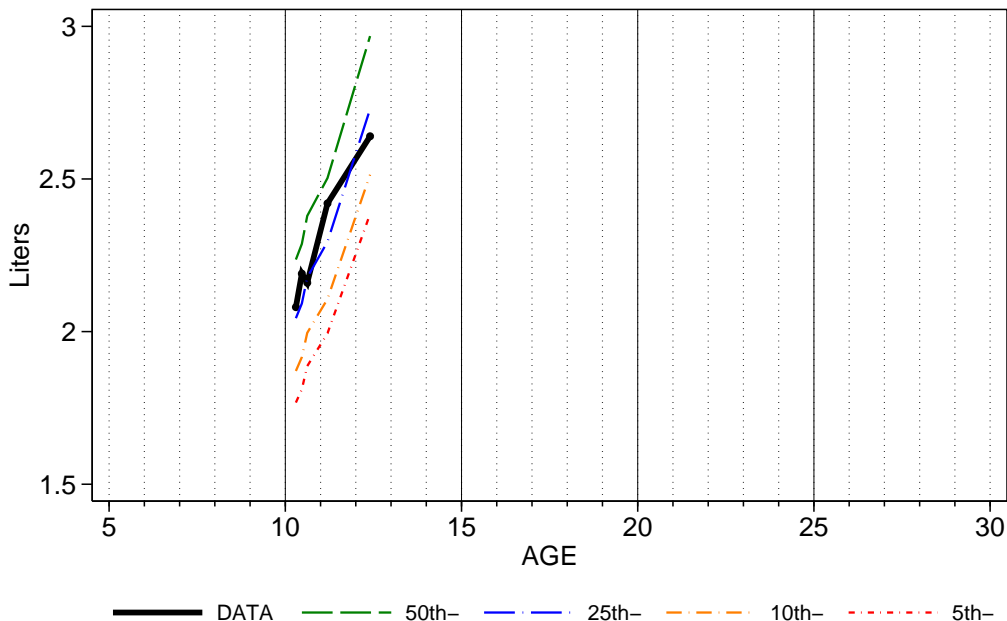

1708

**PATTERN OF GROWTH/DECLINE (Check One)**

- ( 1) Normal Growth
- ( 2) Normal Growth, Early Decline
- ( 3) Reduced Growth
- ( 4) Reduced Growth, Early Decline
- ( 9) Undetermined Pattern
- ( 8) Undetermined - not enough data

Maximum lung growth attained: ( 1) Yes ( 0) No

Plateau started: ( 2) No plateau ( 1) Yes ( 0) No

Decline started: ( 1) Yes ( 0) No

AGE AT each of the following periods (use '99' if N/A):

Maximum Lung Growth: \_\_\_\_ . \_\_\_\_

Start of Plateau: \_\_\_\_ . \_\_\_\_

Start of Decline: \_\_\_\_ . \_\_\_\_



### Pre-BD FEV1 Data and Percentiles: 1710

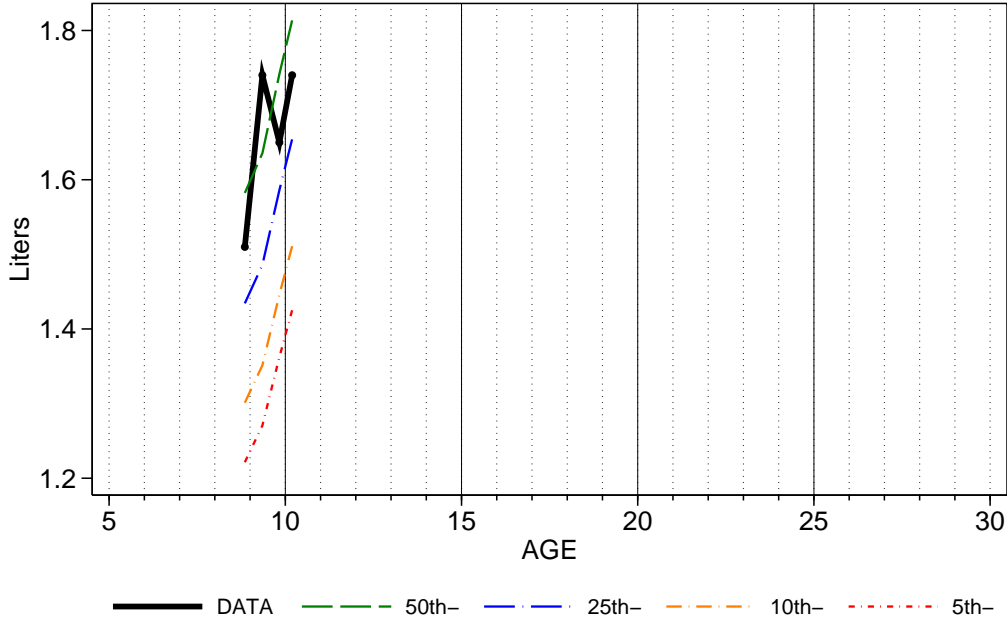

1710

**PATTERN OF GROWTH/DECLINE (Check One)**

- ( 1) Normal Growth
- ( 2) Normal Growth, Early Decline
- ( 3) Reduced Growth
- ( 4) Reduced Growth, Early Decline
- ( 9) Undetermined Pattern
- ( 8) Undetermined - not enough data

Maximum lung growth attained: ( 1) Yes ( 0) No

Plateau started: ( 2) No plateau ( 1) Yes ( 0) No

Decline started: ( 1) Yes ( 0) No

AGE AT each of the following periods (use '99' if N/A):

Maximum Lung Growth: \_\_\_\_ . \_\_\_\_

Start of Plateau: \_\_\_\_ . \_\_\_\_

Start of Decline: \_\_\_\_ . \_\_\_\_

### Pre-BD FEV1 Data and Percentiles: 1720

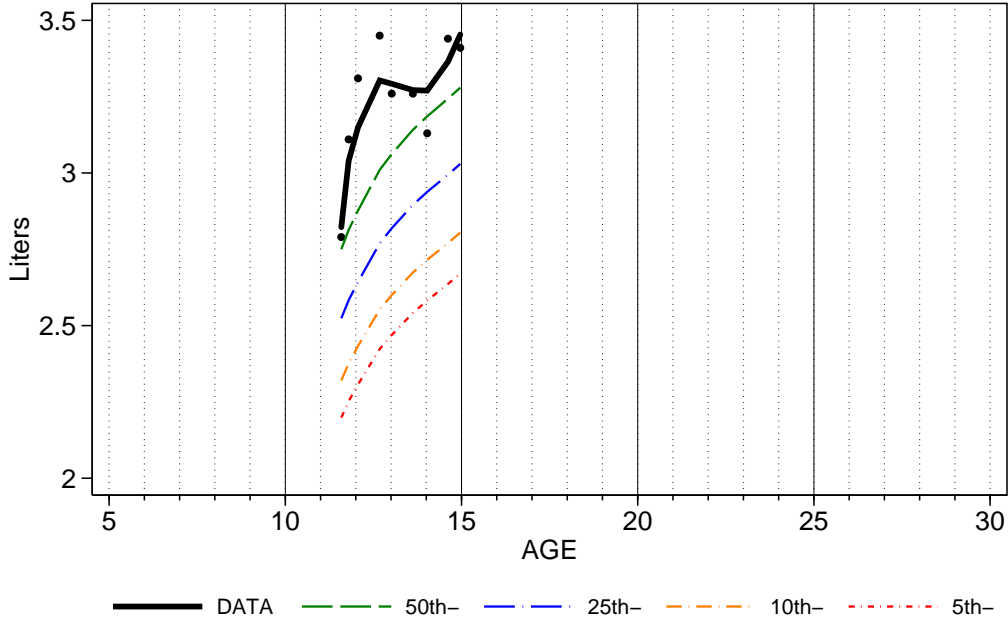

1720

**PATTERN OF GROWTH/DECLINE (Check One)**

- ( 1) Normal Growth
- ( 2) Normal Growth, Early Decline
- ( 3) Reduced Growth
- ( 4) Reduced Growth, Early Decline
- ( 9) Undetermined Pattern
- ( 8) Undetermined - not enough data

Maximum lung growth attained: ( 1) Yes ( 0) No

Plateau started: ( 2) No plateau ( 1) Yes ( 0) No

Decline started: ( 1) Yes ( 0) No

AGE AT each of the following periods (use '99' if N/A):

Maximum Lung Growth: \_\_\_\_ . \_\_\_\_

Start of Plateau: \_\_\_\_ . \_\_\_\_

Start of Decline: \_\_\_\_ . \_\_\_\_

### Pre-BD FEV1 Data and Percentiles: 1721

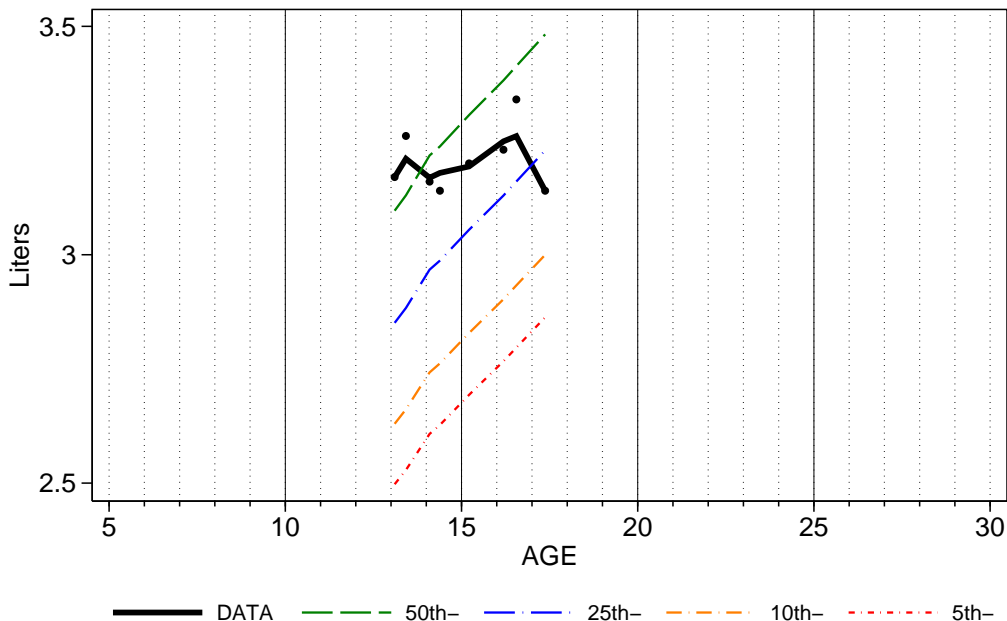

1721

**PATTERN OF GROWTH/DECLINE (Check One)**

- ( 1 ) Normal Growth
- ( 2 ) Normal Growth, Early Decline
- ( 3 ) Reduced Growth
- ( 4 ) Reduced Growth, Early Decline
- ( 9 ) Undetermined Pattern
- ( 8 ) Undetermined - not enough data

Maximum lung growth attained: ( 1 ) Yes ( 0 ) No

Plateau started: ( 2 ) No plateau ( 1 ) Yes ( 0 ) No

Decline started: ( 1 ) Yes ( 0 ) No

AGE AT each of the following periods (use '99' if N/A):

Maximum Lung Growth: \_\_\_\_ . \_\_\_\_

Start of Plateau: \_\_\_\_ . \_\_\_\_

Start of Decline: \_\_\_\_ . \_\_\_\_

### Pre-BD FEV1 Data and Percentiles: 1730

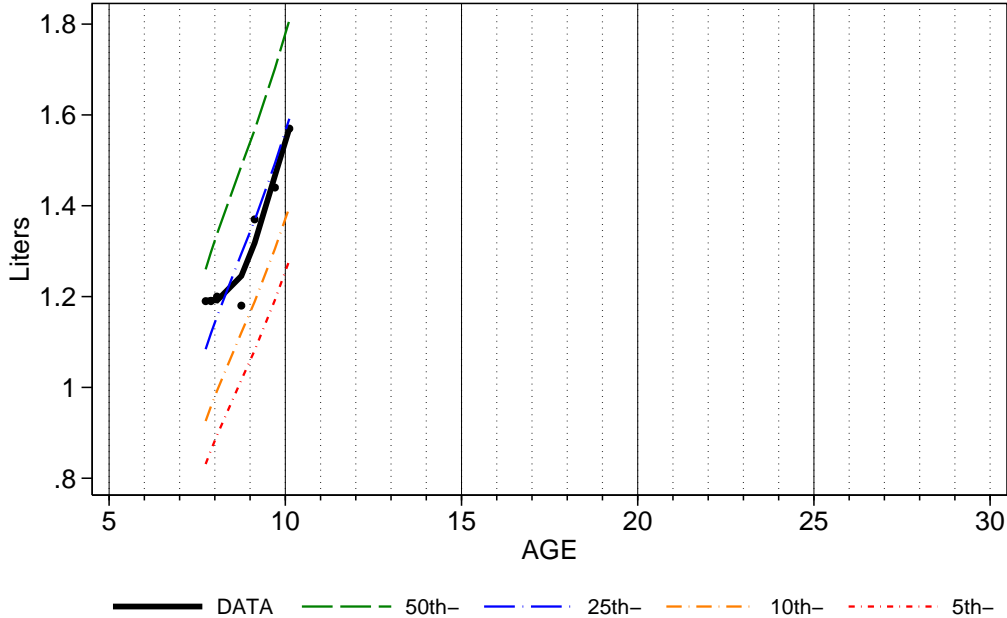

1730

**PATTERN OF GROWTH/DECLINE (Check One)**

- ( 1 ) Normal Growth
- ( 2 ) Normal Growth, Early Decline
- ( 3 ) Reduced Growth
- ( 4 ) Reduced Growth, Early Decline
- ( 9 ) Undetermined Pattern
- ( 8 ) Undetermined - not enough data

Maximum lung growth attained: ( 1 ) Yes ( 0 ) No

Plateau started: ( 2 ) No plateau ( 1 ) Yes ( 0 ) No

Decline started: ( 1 ) Yes ( 0 ) No

AGE AT each of the following periods (use '99' if N/A):

Maximum Lung Growth: \_\_\_\_ . \_\_\_\_

Start of Plateau: \_\_\_\_ . \_\_\_\_

Start of Decline: \_\_\_\_ . \_\_\_\_

### Pre-BD FEV1 Data and Percentiles: 1763

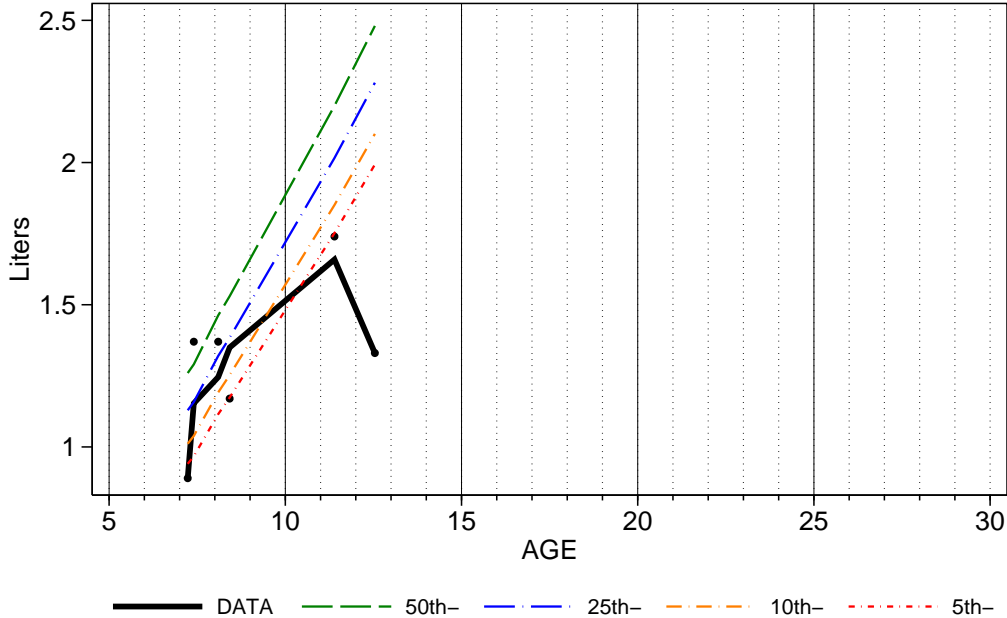

1763

**PATTERN OF GROWTH/DECLINE (Check One)**

- ( 1 ) Normal Growth
- ( 2 ) Normal Growth, Early Decline
- ( 3 ) Reduced Growth
- ( 4 ) Reduced Growth, Early Decline
- ( 9 ) Undetermined Pattern
- ( 8 ) Undetermined - not enough data

Maximum lung growth attained: ( 1 ) Yes ( 0 ) No

Plateau started: ( 2 ) No plateau ( 1 ) Yes ( 0 ) No

Decline started: ( 1 ) Yes ( 0 ) No

AGE AT each of the following periods (use '99' if N/A):

Maximum Lung Growth: \_\_\_\_ . \_\_\_\_

Start of Plateau: \_\_\_\_ . \_\_\_\_

Start of Decline: \_\_\_\_ . \_\_\_\_

### Pre-BD FEV1 Data and Percentiles: 1786

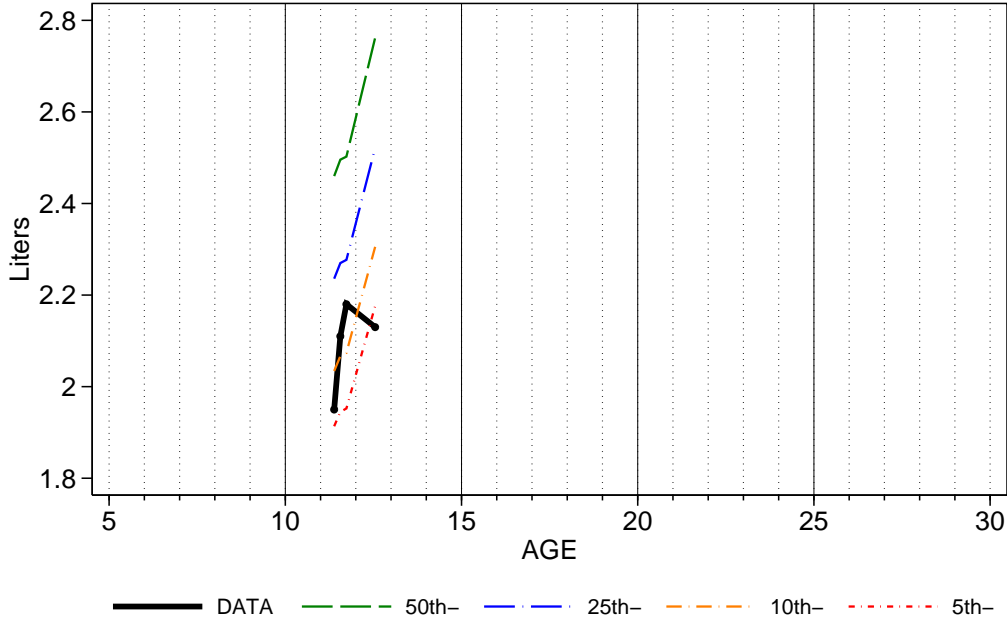

1786

**PATTERN OF GROWTH/DECLINE (Check One)**

- ( 1) Normal Growth
- ( 2) Normal Growth, Early Decline
- ( 3) Reduced Growth
- ( 4) Reduced Growth, Early Decline
- ( 9) Undetermined Pattern
- ( 8) Undetermined - not enough data

Maximum lung growth attained: ( 1) Yes ( 0) No

Plateau started: ( 2) No plateau ( 1) Yes ( 0) No

Decline started: ( 1) Yes ( 0) No

AGE AT each of the following periods (use '99' if N/A):

Maximum Lung Growth: \_\_\_\_ . \_\_\_\_

Start of Plateau: \_\_\_\_ . \_\_\_\_

Start of Decline: \_\_\_\_ . \_\_\_\_

### Pre-BD FEV1 Data and Percentiles: 1824

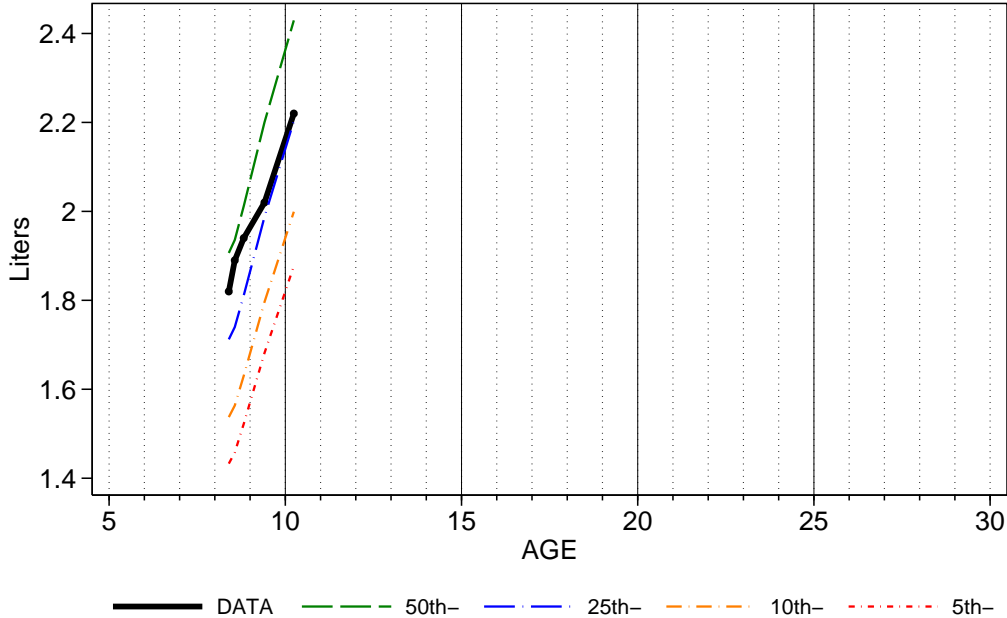

1824

**PATTERN OF GROWTH/DECLINE (Check One)**

- ( 1) Normal Growth
- ( 2) Normal Growth, Early Decline
- ( 3) Reduced Growth
- ( 4) Reduced Growth, Early Decline
- ( 9) Undetermined Pattern
- ( 8) Undetermined - not enough data

Maximum lung growth attained: ( 1) Yes ( 0) No

Plateau started: ( 2) No plateau ( 1) Yes ( 0) No

Decline started: ( 1) Yes ( 0) No

AGE AT each of the following periods (use '99' if N/A):

Maximum Lung Growth: \_\_\_\_ . \_\_\_\_

Start of Plateau: \_\_\_\_ . \_\_\_\_

Start of Decline: \_\_\_\_ . \_\_\_\_

### Pre-BD FEV1 Data and Percentiles: 1835

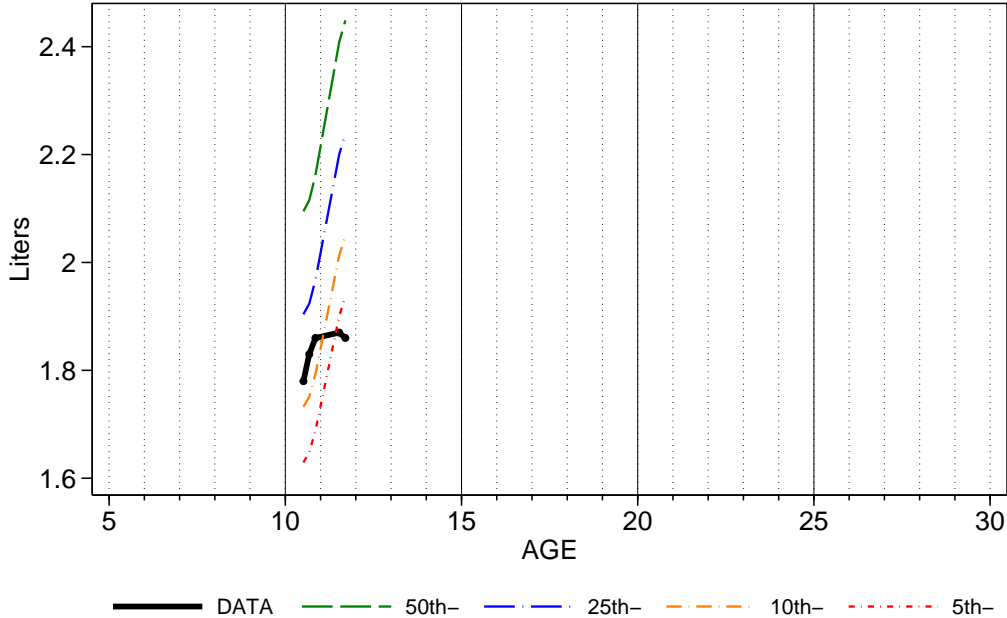

1835

**PATTERN OF GROWTH/DECLINE (Check One)**

- ( 1) Normal Growth
- ( 2) Normal Growth, Early Decline
- ( 3) Reduced Growth
- ( 4) Reduced Growth, Early Decline
- ( 9) Undetermined Pattern
- ( 8) Undetermined - not enough data

Maximum lung growth attained: ( 1) Yes ( 0) No

Plateau started: ( 2) No plateau ( 1) Yes ( 0) No

Decline started: ( 1) Yes ( 0) No

AGE AT each of the following periods (use '99' if N/A):

Maximum Lung Growth: \_\_\_\_ . \_\_\_\_

Start of Plateau: \_\_\_\_ . \_\_\_\_

Start of Decline: \_\_\_\_ . \_\_\_\_



### Pre-BD FEV1 Data and Percentiles: 1847

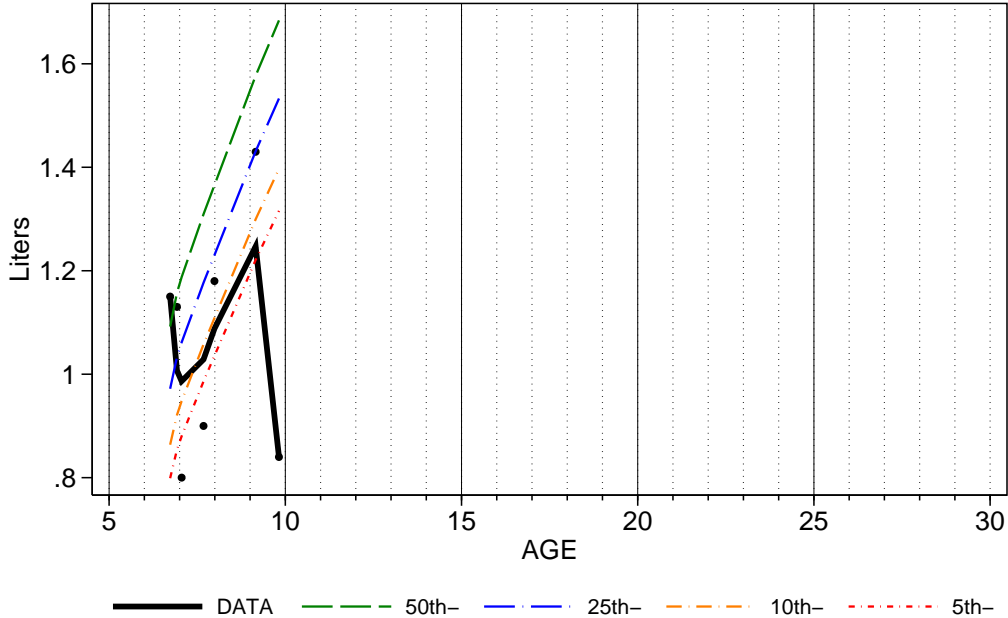

1847

**PATTERN OF GROWTH/DECLINE (Check One)**

- ( 1 ) Normal Growth
- ( 2 ) Normal Growth, Early Decline
- ( 3 ) Reduced Growth
- ( 4 ) Reduced Growth, Early Decline
- ( 9 ) Undetermined Pattern
- ( 8 ) Undetermined - not enough data

Maximum lung growth attained: ( 1 ) Yes ( 0 ) No

Plateau started: ( 2 ) No plateau ( 1 ) Yes ( 0 ) No

Decline started: ( 1 ) Yes ( 0 ) No

AGE AT each of the following periods (use '99' if N/A):

Maximum Lung Growth: \_\_\_\_ . \_\_\_\_

Start of Plateau: \_\_\_\_ . \_\_\_\_

Start of Decline: \_\_\_\_ . \_\_\_\_

### Pre-BD FEV1 Data and Percentiles: 1856

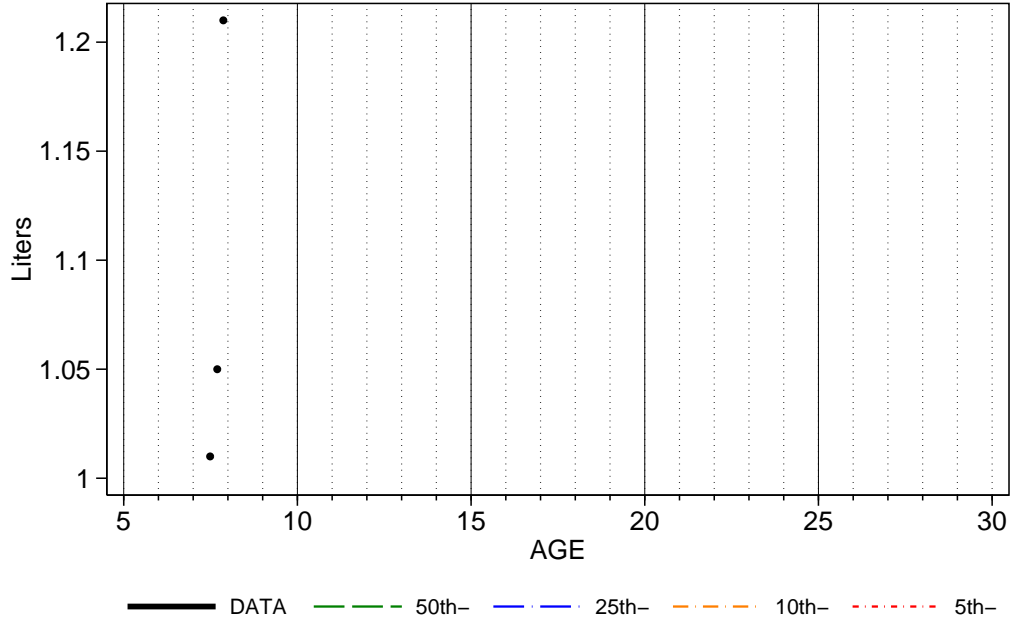

1856

**PATTERN OF GROWTH/DECLINE (Check One)**

- ( 1) Normal Growth
- ( 2) Normal Growth, Early Decline
- ( 3) Reduced Growth
- ( 4) Reduced Growth, Early Decline
- ( 9) Undetermined Pattern
- ( 8) Undetermined - not enough data

Maximum lung growth attained: ( 1) Yes ( 0) No

Plateau started: ( 2) No plateau ( 1) Yes ( 0) No

Decline started: ( 1) Yes ( 0) No

AGE AT each of the following periods (use '99' if N/A):

Maximum Lung Growth: \_\_\_\_ . \_\_\_\_

Start of Plateau: \_\_\_\_ . \_\_\_\_

Start of Decline: \_\_\_\_ . \_\_\_\_

### Pre-BD FEV1 Data and Percentiles: 1859

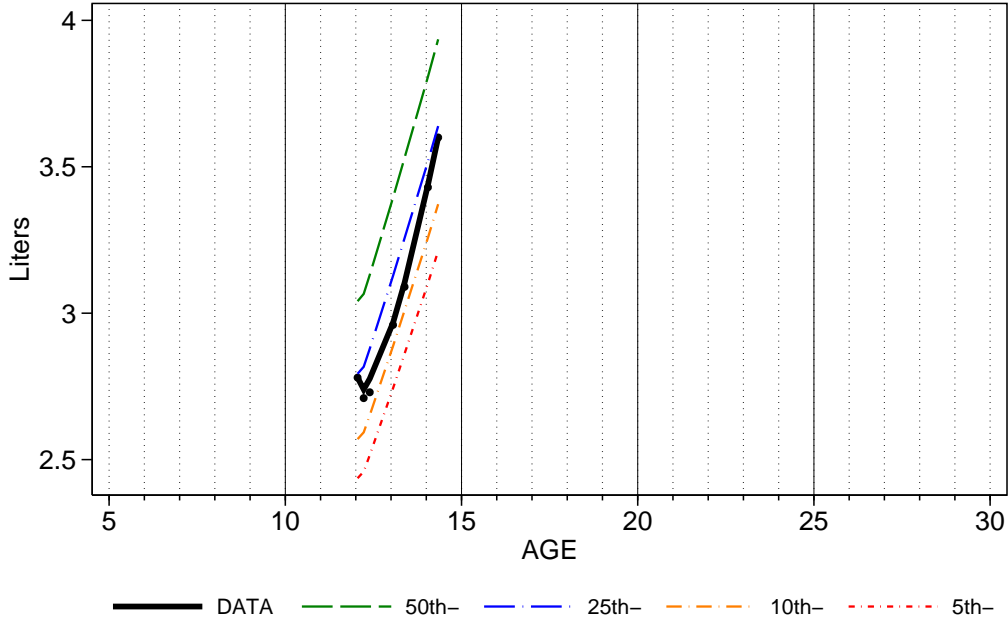

1859

**PATTERN OF GROWTH/DECLINE (Check One)**

- ( 1) Normal Growth
- ( 2) Normal Growth, Early Decline
- ( 3) Reduced Growth
- ( 4) Reduced Growth, Early Decline
- ( 9) Undetermined Pattern
- ( 8) Undetermined - not enough data

Maximum lung growth attained: ( 1) Yes ( 0) No

Plateau started: ( 2) No plateau ( 1) Yes ( 0) No

Decline started: ( 1) Yes ( 0) No

AGE AT each of the following periods (use '99' if N/A):

Maximum Lung Growth: \_\_\_\_ . \_\_\_\_

Start of Plateau: \_\_\_\_ . \_\_\_\_

Start of Decline: \_\_\_\_ . \_\_\_\_

### Pre-BD FEV1 Data and Percentiles: 1861

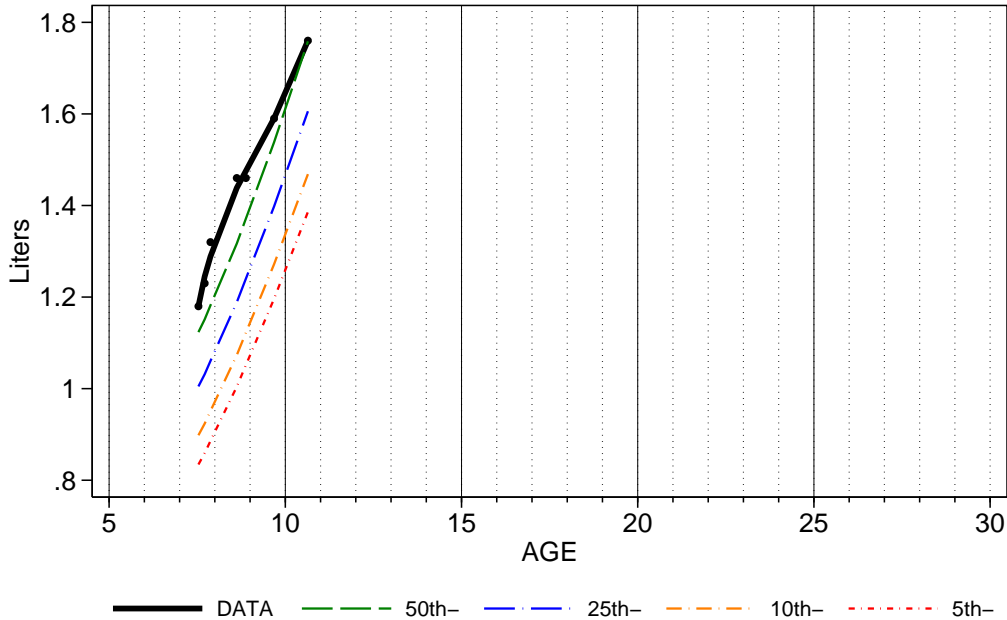

1861

**PATTERN OF GROWTH/DECLINE (Check One)**

- ( 1 ) Normal Growth
- ( 2 ) Normal Growth, Early Decline
- ( 3 ) Reduced Growth
- ( 4 ) Reduced Growth, Early Decline
- ( 9 ) Undetermined Pattern
- ( 8 ) Undetermined - not enough data

Maximum lung growth attained: ( 1 ) Yes ( 0 ) No

Plateau started: ( 2 ) No plateau ( 1 ) Yes ( 0 ) No

Decline started: ( 1 ) Yes ( 0 ) No

AGE AT each of the following periods (use '99' if N/A):

Maximum Lung Growth: \_\_\_\_ . \_\_\_\_

Start of Plateau: \_\_\_\_ . \_\_\_\_

Start of Decline: \_\_\_\_ . \_\_\_\_

### Pre-BD FEV1 Data and Percentiles: 1882

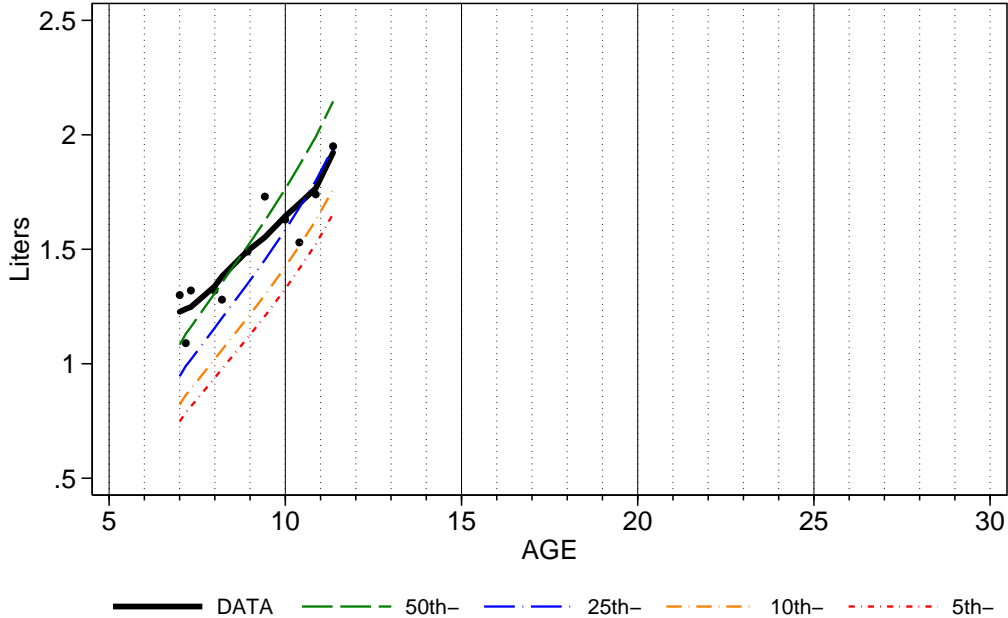

1882

**PATTERN OF GROWTH/DECLINE (Check One)**

- ( 1) Normal Growth
- ( 2) Normal Growth, Early Decline
- ( 3) Reduced Growth
- ( 4) Reduced Growth, Early Decline
- ( 9) Undetermined Pattern
- ( 8) Undetermined - not enough data

Maximum lung growth attained: ( 1) Yes ( 0) No

Plateau started: ( 2) No plateau ( 1) Yes ( 0) No

Decline started: ( 1) Yes ( 0) No

AGE AT each of the following periods (use '99' if N/A):

Maximum Lung Growth: \_\_\_\_ . \_\_\_\_

Start of Plateau: \_\_\_\_ . \_\_\_\_

Start of Decline: \_\_\_\_ . \_\_\_\_

### Pre-BD FEV1 Data and Percentiles: 1909

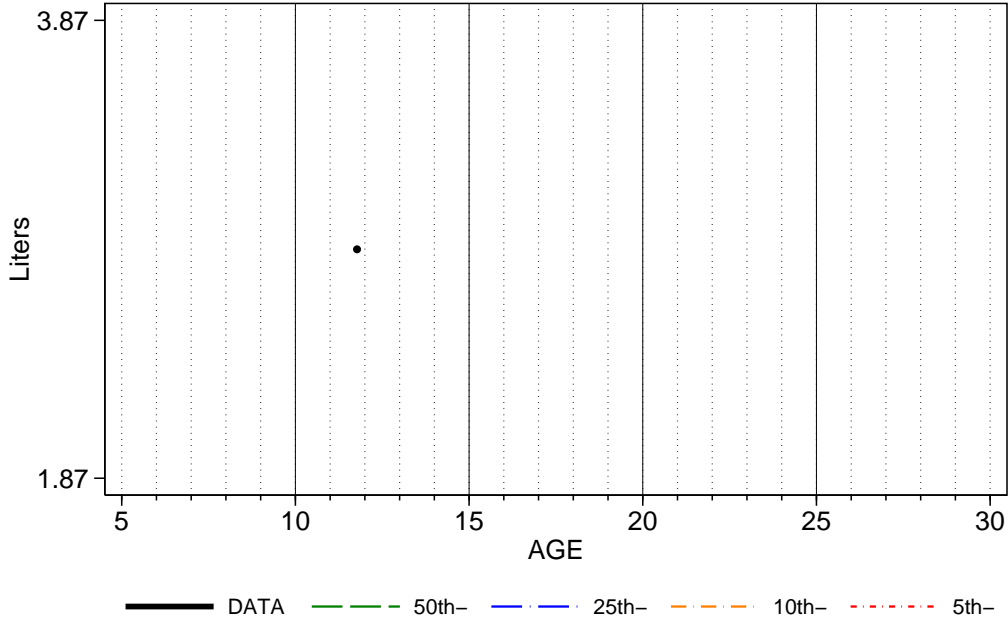

1909

**PATTERN OF GROWTH/DECLINE (Check One)**

- ( 1 ) Normal Growth
- ( 2 ) Normal Growth, Early Decline
- ( 3 ) Reduced Growth
- ( 4 ) Reduced Growth, Early Decline
- ( 9 ) Undetermined Pattern
- ( 8 ) Undetermined - not enough data

Maximum lung growth attained: ( 1 ) Yes ( 0 ) No

Plateau started: ( 2 ) No plateau ( 1 ) Yes ( 0 ) No

Decline started: ( 1 ) Yes ( 0 ) No

AGE AT each of the following periods (use '99' if N/A):

Maximum Lung Growth: \_\_\_\_ . \_\_\_\_

Start of Plateau: \_\_\_\_ . \_\_\_\_

Start of Decline: \_\_\_\_ . \_\_\_\_

### Pre-BD FEV1 Data and Percentiles: 1919

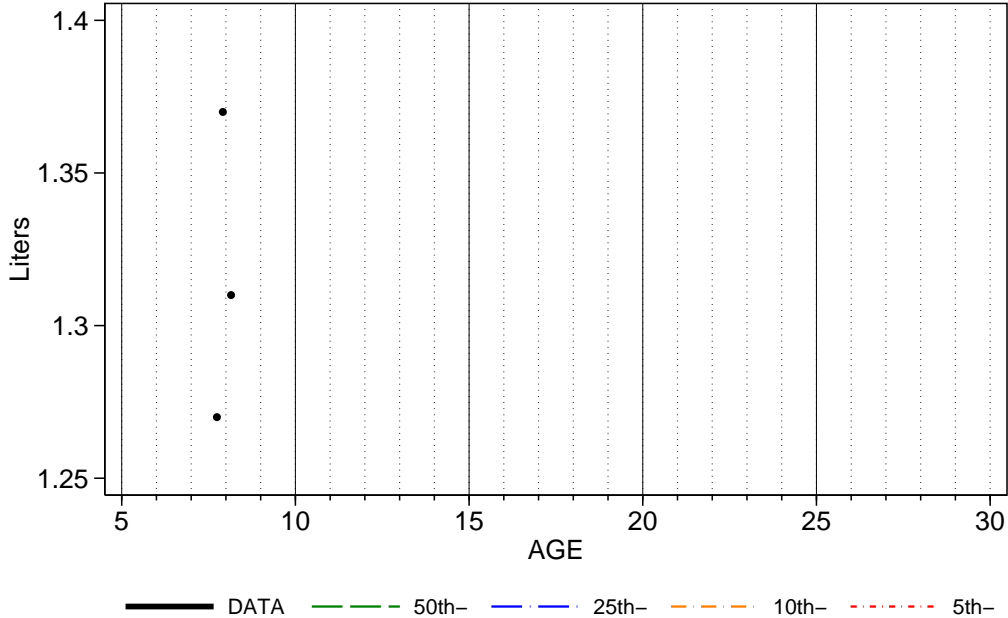

1919

**PATTERN OF GROWTH/DECLINE (Check One)**

- ( 1) Normal Growth
- ( 2) Normal Growth, Early Decline
- ( 3) Reduced Growth
- ( 4) Reduced Growth, Early Decline
- ( 9) Undetermined Pattern
- ( 8) Undetermined - not enough data

Maximum lung growth attained: ( 1) Yes ( 0) No

Plateau started: ( 2) No plateau ( 1) Yes ( 0) No

Decline started: ( 1) Yes ( 0) No

AGE AT each of the following periods (use '99' if N/A):

Maximum Lung Growth: \_\_\_\_ . \_\_\_\_

Start of Plateau: \_\_\_\_ . \_\_\_\_

Start of Decline: \_\_\_\_ . \_\_\_\_

### Pre-BD FEV1 Data and Percentiles: 1929

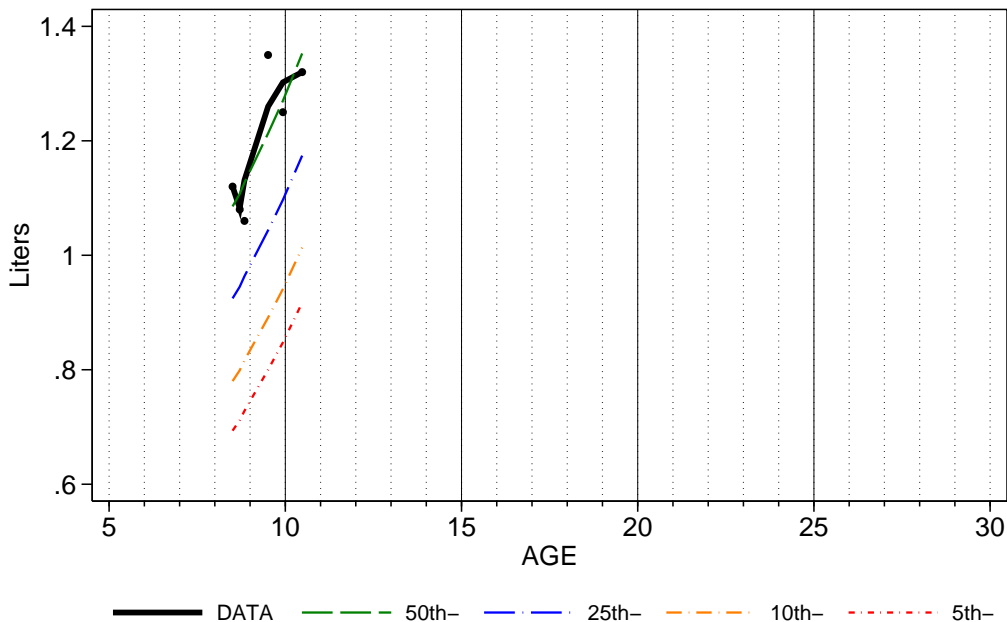

1929

**PATTERN OF GROWTH/DECLINE (Check One)**

- ( 1 ) Normal Growth
- ( 2 ) Normal Growth, Early Decline
- ( 3 ) Reduced Growth
- ( 4 ) Reduced Growth, Early Decline
- ( 9 ) Undetermined Pattern
- ( 8 ) Undetermined - not enough data

Maximum lung growth attained: ( 1 ) Yes ( 0 ) No

Plateau started: ( 2 ) No plateau ( 1 ) Yes ( 0 ) No

Decline started: ( 1 ) Yes ( 0 ) No

AGE AT each of the following periods (use '99' if N/A):

Maximum Lung Growth: \_\_\_\_ . \_\_\_\_

Start of Plateau: \_\_\_\_ . \_\_\_\_

Start of Decline: \_\_\_\_ . \_\_\_\_



### Pre-BD FEV1 Data and Percentiles: 1930

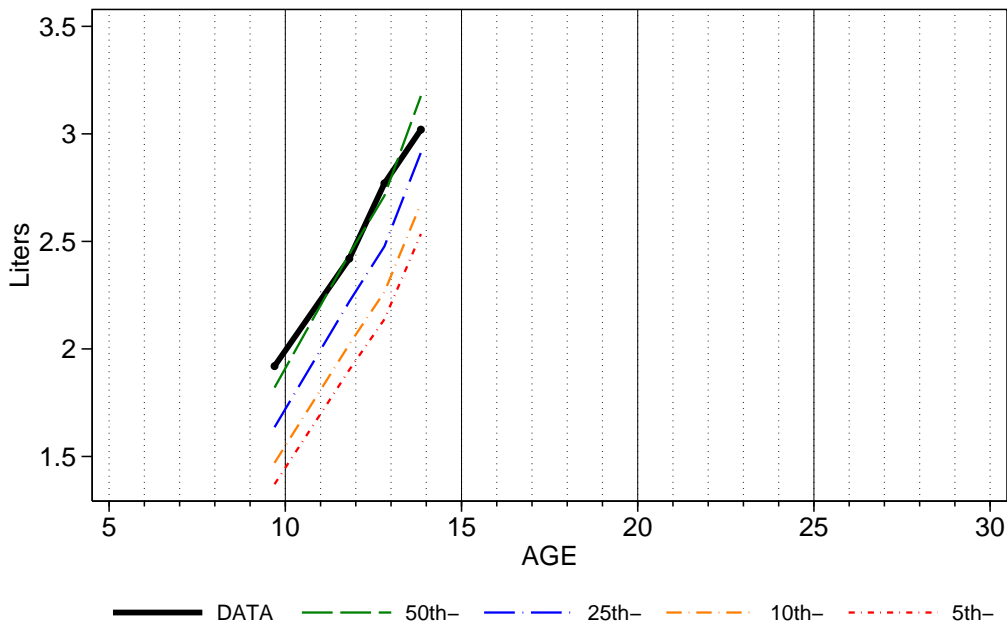

1930

**PATTERN OF GROWTH/DECLINE (Check One)**

- ( 1 ) Normal Growth
- ( 2 ) Normal Growth, Early Decline
- ( 3 ) Reduced Growth
- ( 4 ) Reduced Growth, Early Decline
- ( 9 ) Undetermined Pattern
- ( 8 ) Undetermined - not enough data

Maximum lung growth attained: ( 1 ) Yes ( 0 ) No

Plateau started: ( 2 ) No plateau ( 1 ) Yes ( 0 ) No

Decline started: ( 1 ) Yes ( 0 ) No

AGE AT each of the following periods (use '99' if N/A):

Maximum Lung Growth: \_\_\_\_ . \_\_\_\_

Start of Plateau: \_\_\_\_ . \_\_\_\_

Start of Decline: \_\_\_\_ . \_\_\_\_

### Pre-BD FEV1 Data and Percentiles: 1963

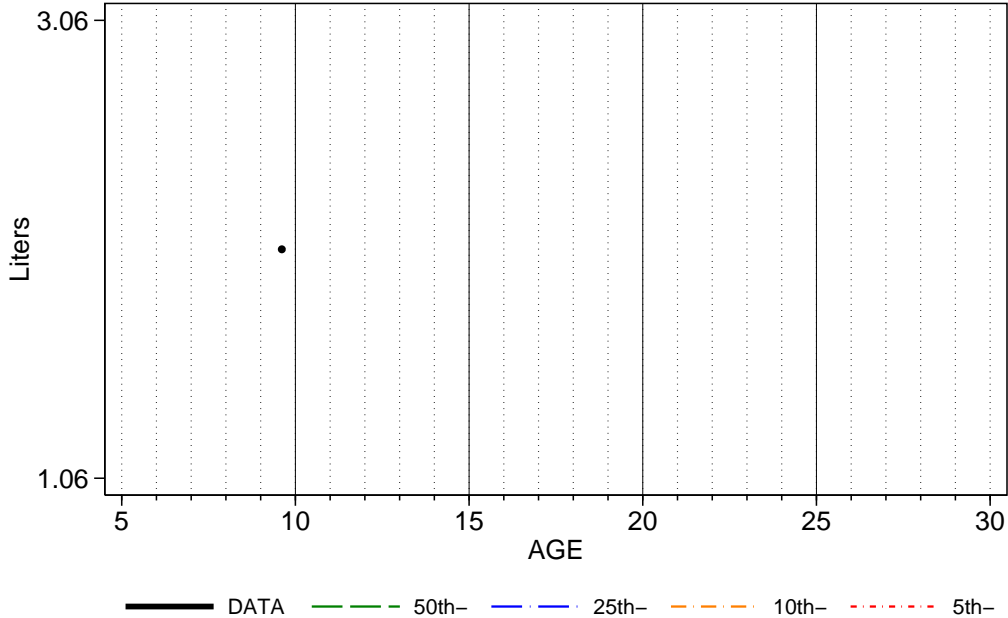

1963

**PATTERN OF GROWTH/DECLINE (Check One)**

- ( 1 ) Normal Growth
- ( 2 ) Normal Growth, Early Decline
- ( 3 ) Reduced Growth
- ( 4 ) Reduced Growth, Early Decline
- ( 9 ) Undetermined Pattern
- ( 8 ) Undetermined - not enough data

Maximum lung growth attained: ( 1 ) Yes ( 0 ) No

Plateau started: ( 2 ) No plateau ( 1 ) Yes ( 0 ) No

Decline started: ( 1 ) Yes ( 0 ) No

AGE AT each of the following periods (use '99' if N/A):

Maximum Lung Growth: \_\_\_\_ . \_\_\_\_

Start of Plateau: \_\_\_\_ . \_\_\_\_

Start of Decline: \_\_\_\_ . \_\_\_\_

### Pre-BD FEV1 Data and Percentiles: 1971

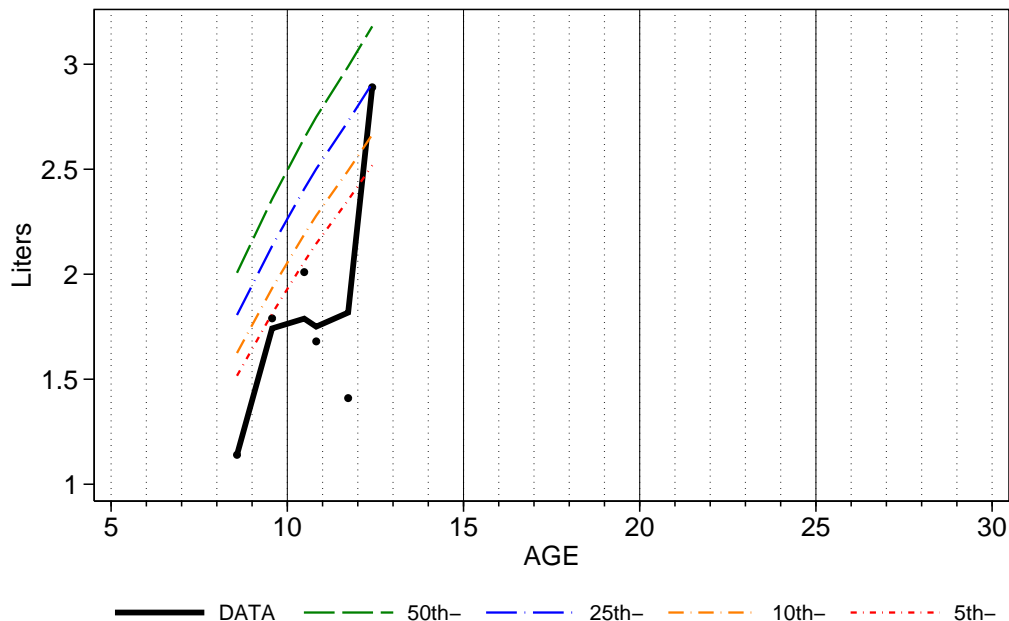

1971

**PATTERN OF GROWTH/DECLINE (Check One)**

- ( 1 ) Normal Growth
- ( 2 ) Normal Growth, Early Decline
- ( 3 ) Reduced Growth
- ( 4 ) Reduced Growth, Early Decline
- ( 9 ) Undetermined Pattern
- ( 8 ) Undetermined - not enough data

Maximum lung growth attained: ( 1 ) Yes ( 0 ) No

Plateau started: ( 2 ) No plateau ( 1 ) Yes ( 0 ) No

Decline started: ( 1 ) Yes ( 0 ) No

AGE AT each of the following periods (use '99' if N/A):

Maximum Lung Growth: \_\_\_\_ . \_\_\_\_

Start of Plateau: \_\_\_\_ . \_\_\_\_

Start of Decline: \_\_\_\_ . \_\_\_\_

### Pre-BD FEV1 Data and Percentiles: 1977

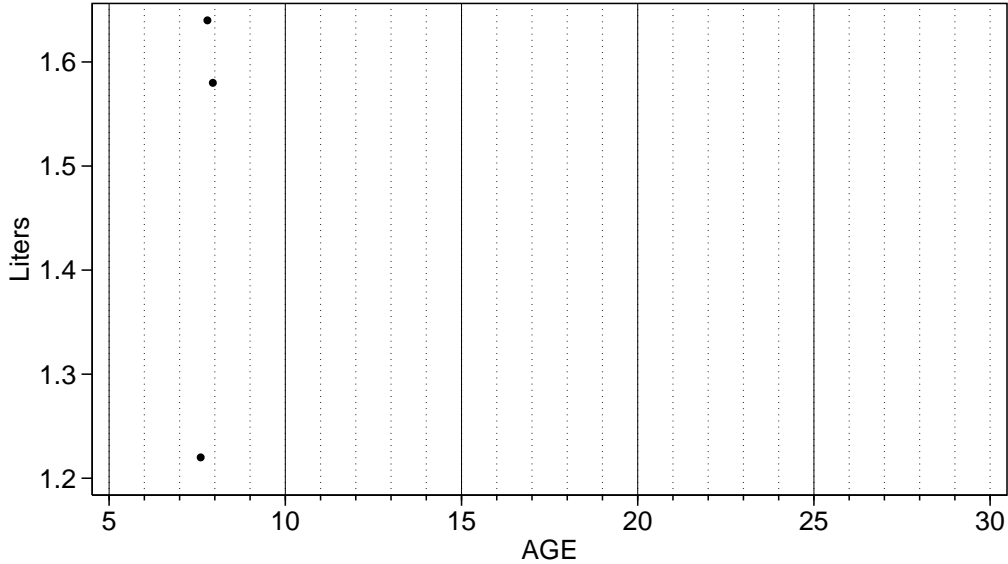

DATA  
  50th-  
  25th-  
  10th-  
  5th-

1977

**PATTERN OF GROWTH/DECLINE (Check One)**

- ( 1 ) Normal Growth
- ( 2 ) Normal Growth, Early Decline
- ( 3 ) Reduced Growth
- ( 4 ) Reduced Growth, Early Decline
- ( 9 ) Undetermined Pattern
- ( 8 ) Undetermined - not enough data

Maximum lung growth attained: ( 1 ) Yes ( 0 ) No

Plateau started: ( 2 ) No plateau ( 1 ) Yes ( 0 ) No

Decline started: ( 1 ) Yes ( 0 ) No

AGE AT each of the following periods (use '99' if N/A):

Maximum Lung Growth: \_\_\_\_ . \_\_\_\_

Start of Plateau: \_\_\_\_ . \_\_\_\_

Start of Decline: \_\_\_\_ . \_\_\_\_

### Pre-BD FEV1 Data and Percentiles: 1981

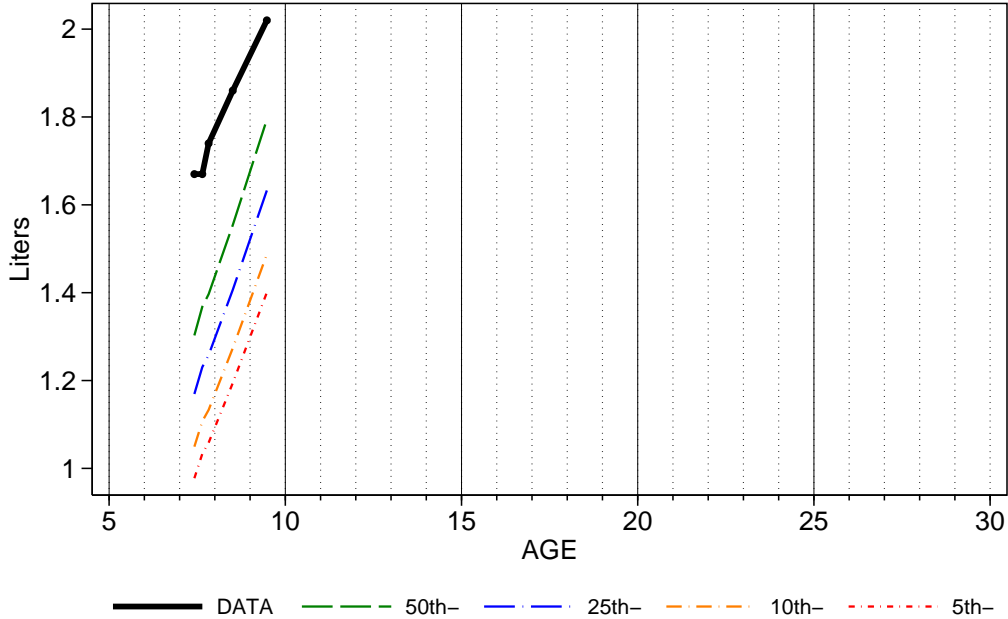

1981

**PATTERN OF GROWTH/DECLINE (Check One)**

- ( 1 ) Normal Growth
- ( 2 ) Normal Growth, Early Decline
- ( 3 ) Reduced Growth
- ( 4 ) Reduced Growth, Early Decline
- ( 9 ) Undetermined Pattern
- ( 8 ) Undetermined - not enough data

Maximum lung growth attained: ( 1 ) Yes ( 0 ) No

Plateau started: ( 2 ) No plateau ( 1 ) Yes ( 0 ) No

Decline started: ( 1 ) Yes ( 0 ) No

AGE AT each of the following periods (use '99' if N/A):

Maximum Lung Growth: \_\_\_\_ . \_\_\_\_

Start of Plateau: \_\_\_\_ . \_\_\_\_

Start of Decline: \_\_\_\_ . \_\_\_\_

### Pre-BD FEV1 Data and Percentiles: 2040

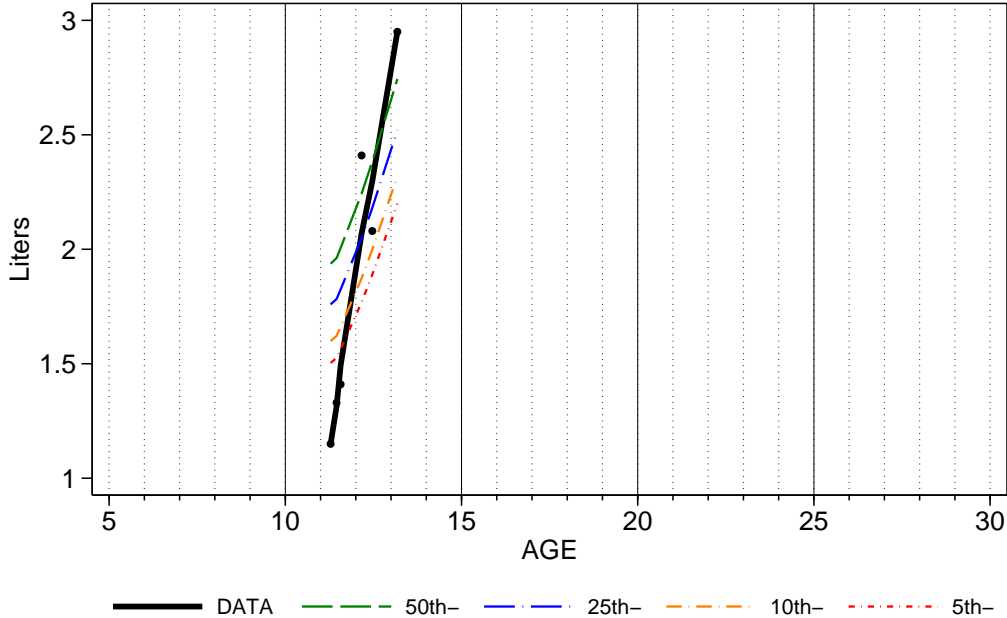

2040

**PATTERN OF GROWTH/DECLINE (Check One)**

- ( 1) Normal Growth
- ( 2) Normal Growth, Early Decline
- ( 3) Reduced Growth
- ( 4) Reduced Growth, Early Decline
- ( 9) Undetermined Pattern
- ( 8) Undetermined - not enough data

Maximum lung growth attained: ( 1) Yes ( 0) No

Plateau started: ( 2) No plateau ( 1) Yes ( 0) No

Decline started: ( 1) Yes ( 0) No

AGE AT each of the following periods (use '99' if N/A):

Maximum Lung Growth: \_\_\_\_ . \_\_\_\_

Start of Plateau: \_\_\_\_ . \_\_\_\_

Start of Decline: \_\_\_\_ . \_\_\_\_

### Pre-BD FEV1 Data and Percentiles: 1015

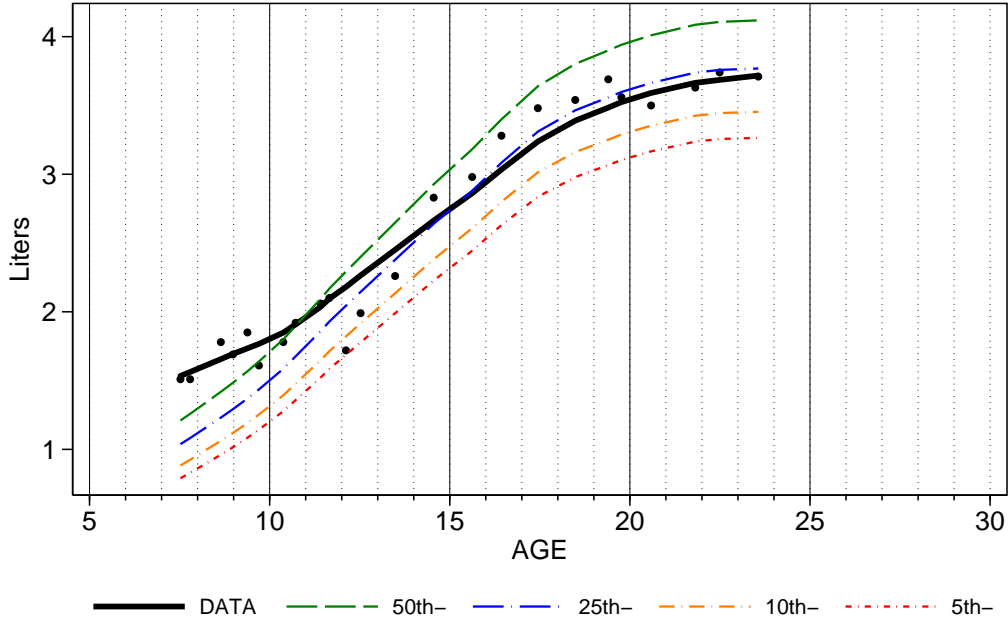

1015

**PATTERN OF GROWTH/DECLINE (Check One)**

- ( 1) Normal Growth
- ( 2) Normal Growth, Early Decline
- ( 3) Reduced Growth
- ( 4) Reduced Growth, Early Decline
- ( 9) Undetermined Pattern
- ( 8) Undetermined - not enough data

Maximum lung growth attained: ( 1) Yes ( 0) No

Plateau started: ( 2) No plateau ( 1) Yes ( 0) No

Decline started: ( 1) Yes ( 0) No

AGE AT each of the following periods (use '99' if N/A):

Maximum Lung Growth: \_\_\_\_ . \_\_\_\_

Start of Plateau: \_\_\_\_ . \_\_\_\_

Start of Decline: \_\_\_\_ . \_\_\_\_

### Pre-BD FEV1 Data and Percentiles: 1056

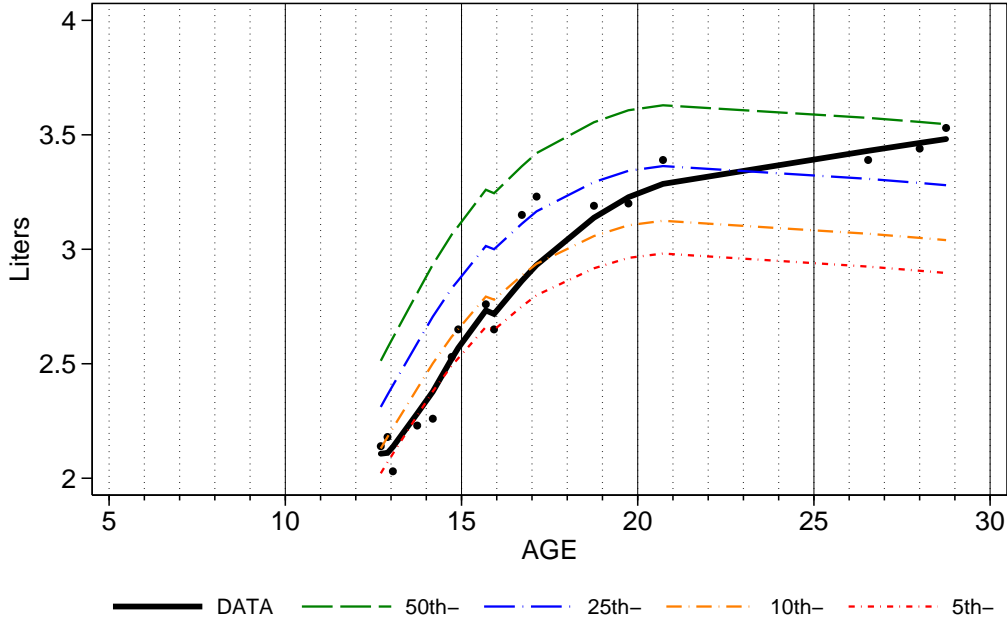

1056

**PATTERN OF GROWTH/DECLINE (Check One)**

- ( 1) Normal Growth
- ( 2) Normal Growth, Early Decline
- ( 3) Reduced Growth
- ( 4) Reduced Growth, Early Decline
- ( 9) Undetermined Pattern
- ( 8) Undetermined - not enough data

Maximum lung growth attained: ( 1) Yes ( 0) No

Plateau started: ( 2) No plateau ( 1) Yes ( 0) No

Decline started: ( 1) Yes ( 0) No

AGE AT each of the following periods (use '99' if N/A):

Maximum Lung Growth: \_\_\_\_ . \_\_\_\_

Start of Plateau: \_\_\_\_ . \_\_\_\_

Start of Decline: \_\_\_\_ . \_\_\_\_



### Pre-BD FEV1 Data and Percentiles: 1085

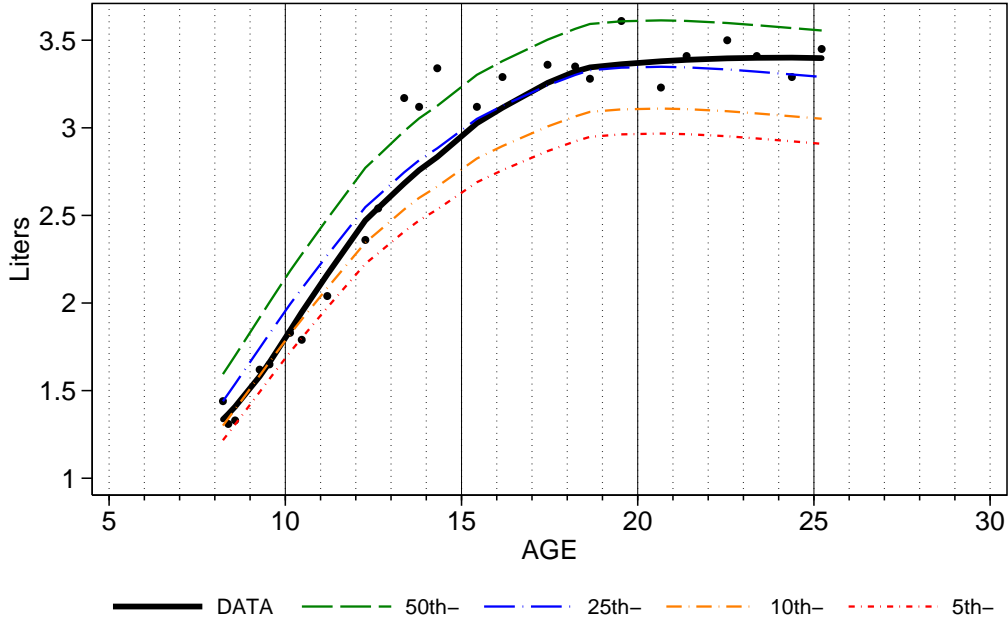

1085

**PATTERN OF GROWTH/DECLINE (Check One)**

- ( 1 ) Normal Growth
- ( 2 ) Normal Growth, Early Decline
- ( 3 ) Reduced Growth
- ( 4 ) Reduced Growth, Early Decline
- ( 9 ) Undetermined Pattern
- ( 8 ) Undetermined - not enough data

Maximum lung growth attained: ( 1 ) Yes ( 0 ) No

Plateau started: ( 2 ) No plateau ( 1 ) Yes ( 0 ) No

Decline started: ( 1 ) Yes ( 0 ) No

AGE AT each of the following periods (use '99' if N/A):

Maximum Lung Growth: \_\_\_\_ . \_\_\_\_

Start of Plateau: \_\_\_\_ . \_\_\_\_

Start of Decline: \_\_\_\_ . \_\_\_\_

### Pre-BD FEV1 Data and Percentiles: 1113

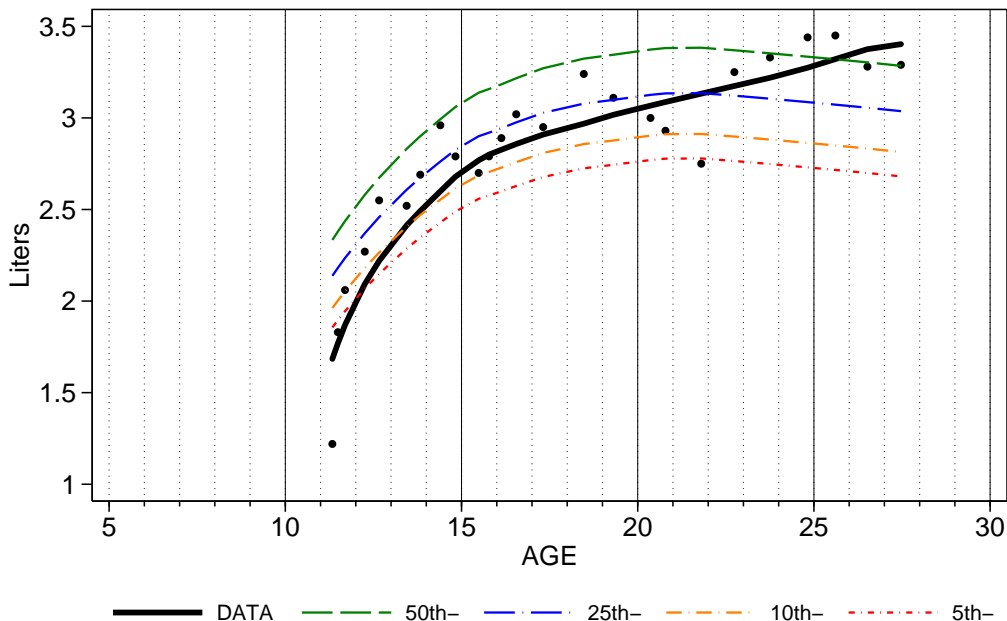

1113

**PATTERN OF GROWTH/DECLINE (Check One)**

- ( 1 ) Normal Growth
- ( 2 ) Normal Growth, Early Decline
- ( 3 ) Reduced Growth
- ( 4 ) Reduced Growth, Early Decline
- ( 9 ) Undetermined Pattern
- ( 8 ) Undetermined - not enough data

Maximum lung growth attained: ( 1 ) Yes ( 0 ) No

Plateau started: ( 2 ) No plateau ( 1 ) Yes ( 0 ) No

Decline started: ( 1 ) Yes ( 0 ) No

AGE AT each of the following periods (use '99' if N/A):

Maximum Lung Growth: \_\_\_\_ . \_\_\_\_

Start of Plateau: \_\_\_\_ . \_\_\_\_

Start of Decline: \_\_\_\_ . \_\_\_\_

### Pre-BD FEV1 Data and Percentiles: 1185

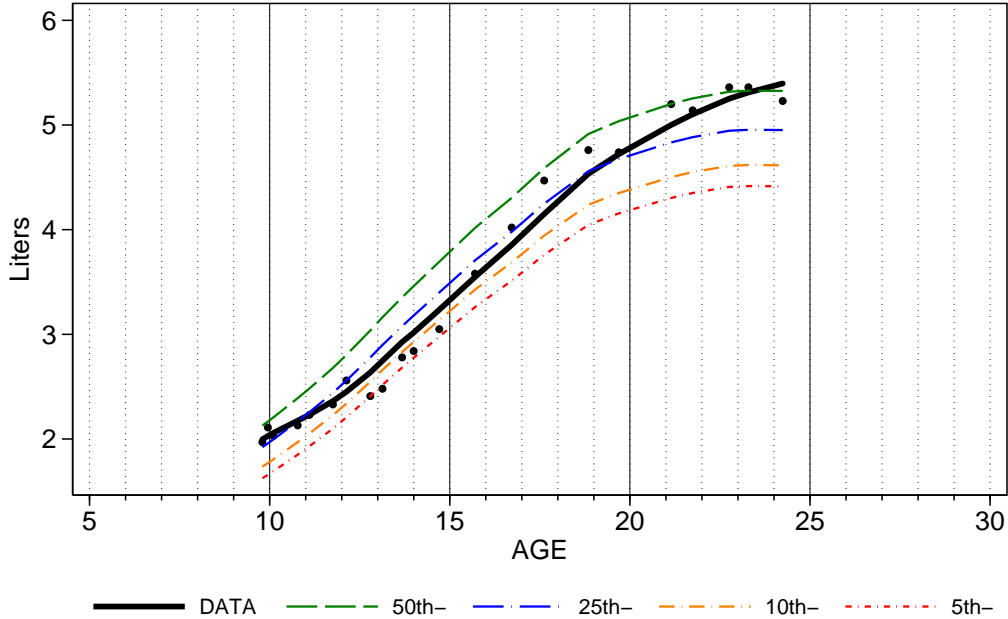

1185

**PATTERN OF GROWTH/DECLINE (Check One)**

- ( 1) Normal Growth
- ( 2) Normal Growth, Early Decline
- ( 3) Reduced Growth
- ( 4) Reduced Growth, Early Decline
- ( 9) Undetermined Pattern
- ( 8) Undetermined - not enough data

Maximum lung growth attained: ( 1) Yes ( 0) No

Plateau started: ( 2) No plateau ( 1) Yes ( 0) No

Decline started: ( 1) Yes ( 0) No

AGE AT each of the following periods (use '99' if N/A):

Maximum Lung Growth: \_\_\_\_ . \_\_\_\_

Start of Plateau: \_\_\_\_ . \_\_\_\_

Start of Decline: \_\_\_\_ . \_\_\_\_

### Pre-BD FEV1 Data and Percentiles: 1198

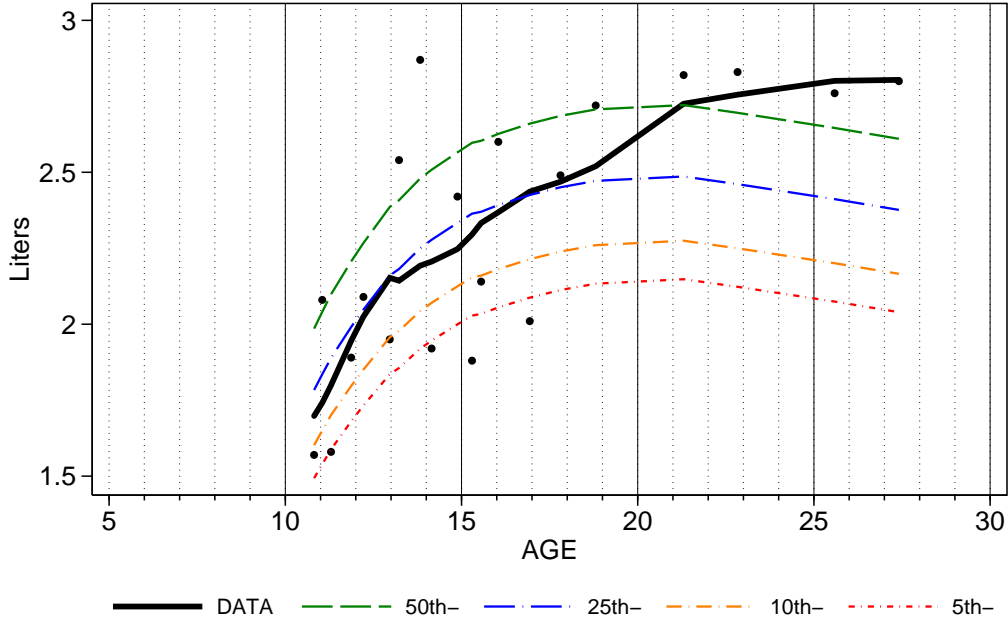

1198

**PATTERN OF GROWTH/DECLINE (Check One)**

- ( 1 ) Normal Growth
- ( 2 ) Normal Growth, Early Decline
- ( 3 ) Reduced Growth
- ( 4 ) Reduced Growth, Early Decline
- ( 9 ) Undetermined Pattern
- ( 8 ) Undetermined - not enough data

Maximum lung growth attained: ( 1 ) Yes ( 0 ) No

Plateau started: ( 2 ) No plateau ( 1 ) Yes ( 0 ) No

Decline started: ( 1 ) Yes ( 0 ) No

AGE AT each of the following periods (use '99' if N/A):

Maximum Lung Growth: \_\_\_\_ . \_\_\_\_

Start of Plateau: \_\_\_\_ . \_\_\_\_

Start of Decline: \_\_\_\_ . \_\_\_\_

### Pre-BD FEV1 Data and Percentiles: 1252

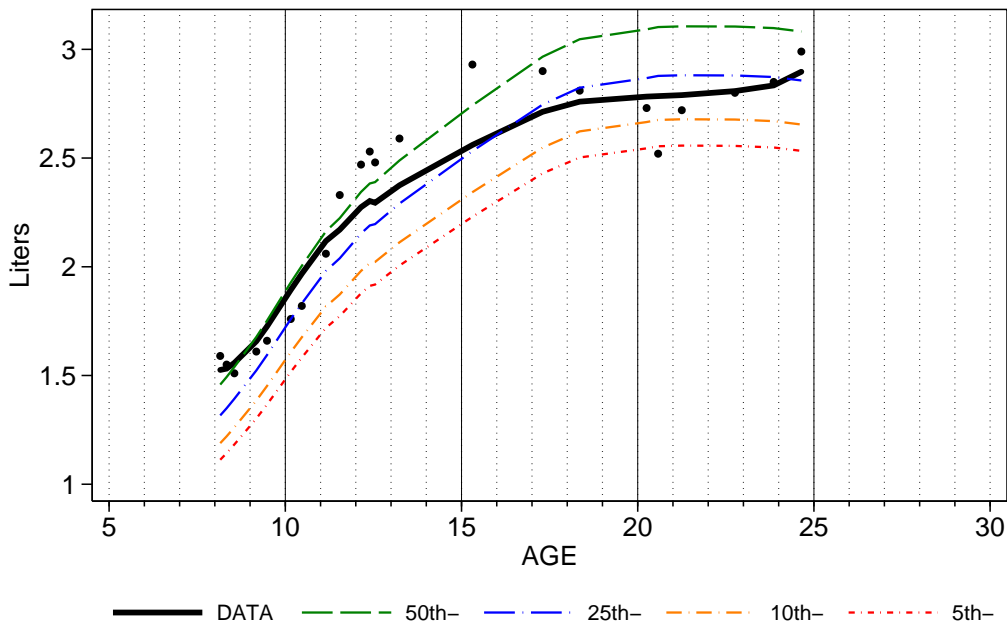

1252

**PATTERN OF GROWTH/DECLINE (Check One)**

- ( 1 ) Normal Growth
- ( 2 ) Normal Growth, Early Decline
- ( 3 ) Reduced Growth
- ( 4 ) Reduced Growth, Early Decline
- ( 9 ) Undetermined Pattern
- ( 8 ) Undetermined - not enough data

Maximum lung growth attained: ( 1 ) Yes ( 0 ) No

Plateau started: ( 2 ) No plateau ( 1 ) Yes ( 0 ) No

Decline started: ( 1 ) Yes ( 0 ) No

AGE AT each of the following periods (use '99' if N/A):

Maximum Lung Growth: \_\_\_\_ . \_\_\_\_

Start of Plateau: \_\_\_\_ . \_\_\_\_

Start of Decline: \_\_\_\_ . \_\_\_\_

### Pre-BD FEV1 Data and Percentiles: 1267

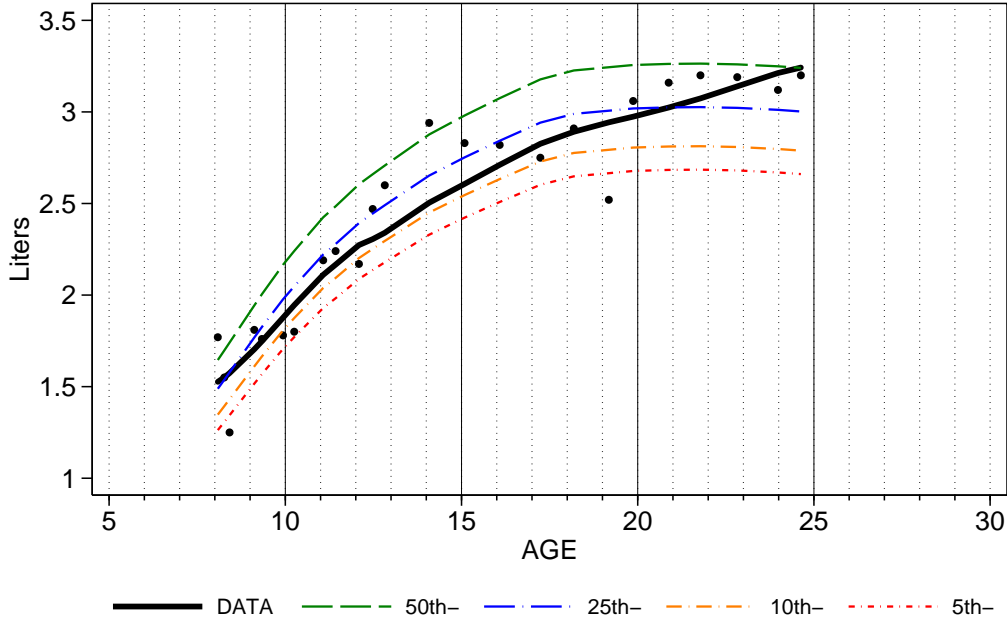

1267

**PATTERN OF GROWTH/DECLINE (Check One)**

- ( 1) Normal Growth
- ( 2) Normal Growth, Early Decline
- ( 3) Reduced Growth
- ( 4) Reduced Growth, Early Decline
- ( 9) Undetermined Pattern
- ( 8) Undetermined - not enough data

Maximum lung growth attained: ( 1) Yes ( 0) No

Plateau started: ( 2) No plateau ( 1) Yes ( 0) No

Decline started: ( 1) Yes ( 0) No

AGE AT each of the following periods (use '99' if N/A):

Maximum Lung Growth: \_\_\_\_ . \_\_\_\_

Start of Plateau: \_\_\_\_ . \_\_\_\_

Start of Decline: \_\_\_\_ . \_\_\_\_

### Pre-BD FEV1 Data and Percentiles: 1306

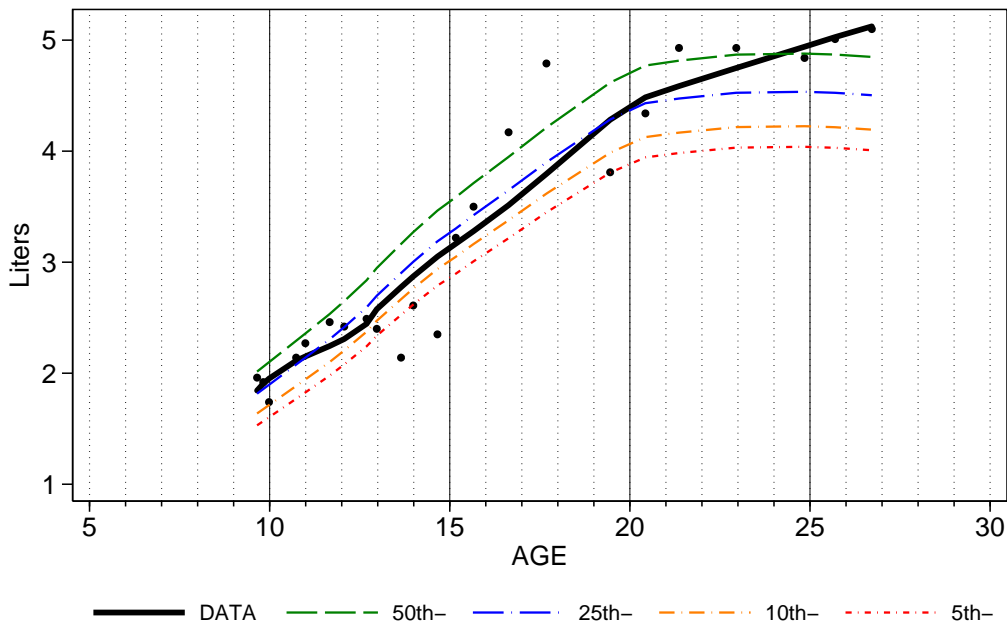

1306

**PATTERN OF GROWTH/DECLINE (Check One)**

- ( 1 ) Normal Growth
- ( 2 ) Normal Growth, Early Decline
- ( 3 ) Reduced Growth
- ( 4 ) Reduced Growth, Early Decline
- ( 9 ) Undetermined Pattern
- ( 8 ) Undetermined - not enough data

Maximum lung growth attained: ( 1 ) Yes ( 0 ) No

Plateau started: ( 2 ) No plateau ( 1 ) Yes ( 0 ) No

Decline started: ( 1 ) Yes ( 0 ) No

AGE AT each of the following periods (use '99' if N/A):

Maximum Lung Growth: \_\_\_\_ . \_\_\_\_

Start of Plateau: \_\_\_\_ . \_\_\_\_

Start of Decline: \_\_\_\_ . \_\_\_\_

### Pre-BD FEV1 Data and Percentiles: 1414

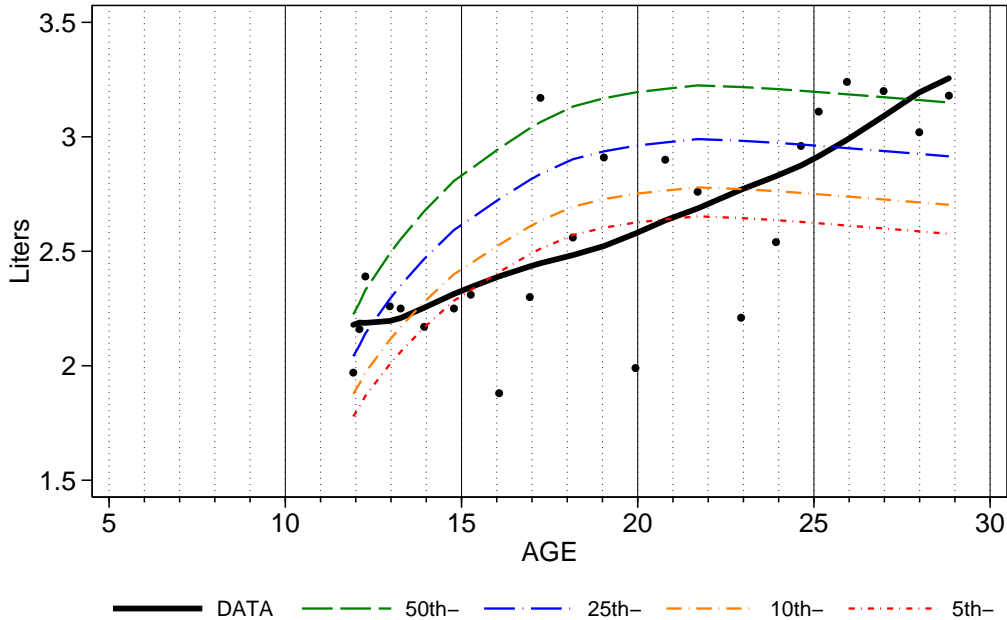

1414

**PATTERN OF GROWTH/DECLINE (Check One)**

- ( 1) Normal Growth
- ( 2) Normal Growth, Early Decline
- ( 3) Reduced Growth
- ( 4) Reduced Growth, Early Decline
- ( 9) Undetermined Pattern
- ( 8) Undetermined - not enough data

Maximum lung growth attained: ( 1) Yes ( 0) No

Plateau started: ( 2) No plateau ( 1) Yes ( 0) No

Decline started: ( 1) Yes ( 0) No

AGE AT each of the following periods (use '99' if N/A):

Maximum Lung Growth: \_\_\_\_ . \_\_\_\_

Start of Plateau: \_\_\_\_ . \_\_\_\_

Start of Decline: \_\_\_\_ . \_\_\_\_



### Pre-BD FEV1 Data and Percentiles: 1517

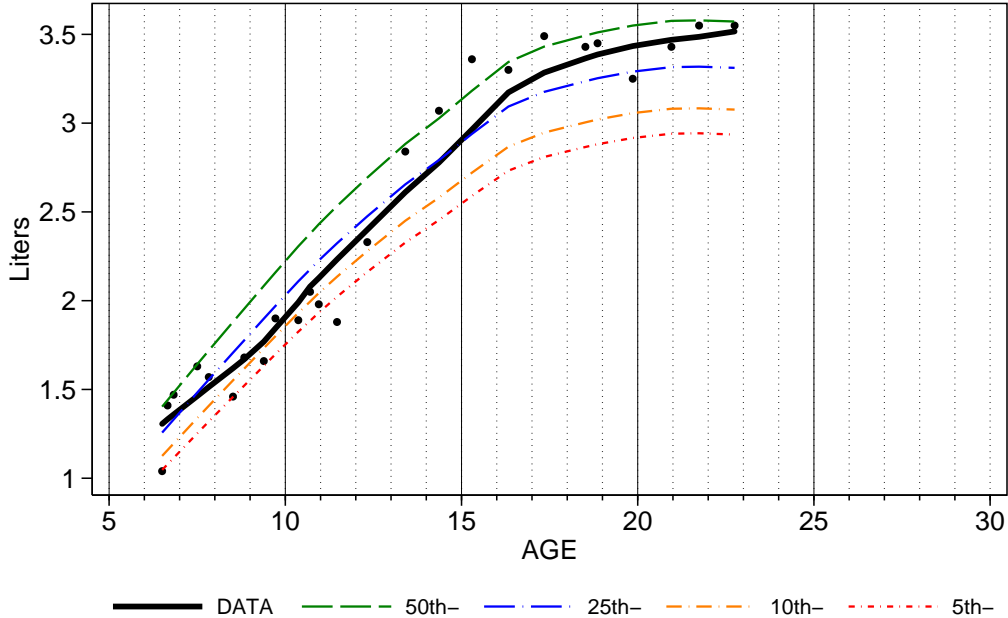

1517

**PATTERN OF GROWTH/DECLINE (Check One)**

- ( 1) Normal Growth
- ( 2) Normal Growth, Early Decline
- ( 3) Reduced Growth
- ( 4) Reduced Growth, Early Decline
- ( 9) Undetermined Pattern
- ( 8) Undetermined - not enough data

Maximum lung growth attained: ( 1) Yes ( 0) No

Plateau started: ( 2) No plateau ( 1) Yes ( 0) No

Decline started: ( 1) Yes ( 0) No

AGE AT each of the following periods (use '99' if N/A):

Maximum Lung Growth: \_\_\_\_ . \_\_\_\_

Start of Plateau: \_\_\_\_ . \_\_\_\_

Start of Decline: \_\_\_\_ . \_\_\_\_

### Pre-BD FEV1 Data and Percentiles: 1518

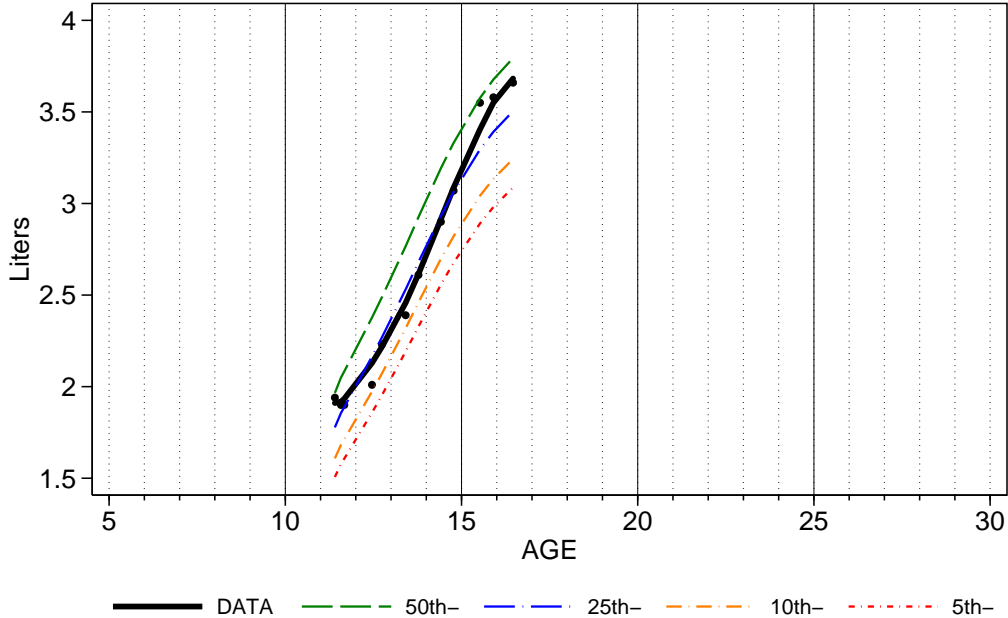

1518

**PATTERN OF GROWTH/DECLINE (Check One)**

- ( 1) Normal Growth
- ( 2) Normal Growth, Early Decline
- ( 3) Reduced Growth
- ( 4) Reduced Growth, Early Decline
- ( 9) Undetermined Pattern
- ( 8) Undetermined - not enough data

Maximum lung growth attained: ( 1) Yes ( 0) No

Plateau started: ( 2) No plateau ( 1) Yes ( 0) No

Decline started: ( 1) Yes ( 0) No

AGE AT each of the following periods (use '99' if N/A):

Maximum Lung Growth: \_\_\_\_ . \_\_\_\_

Start of Plateau: \_\_\_\_ . \_\_\_\_

Start of Decline: \_\_\_\_ . \_\_\_\_

### Pre-BD FEV1 Data and Percentiles: 1523

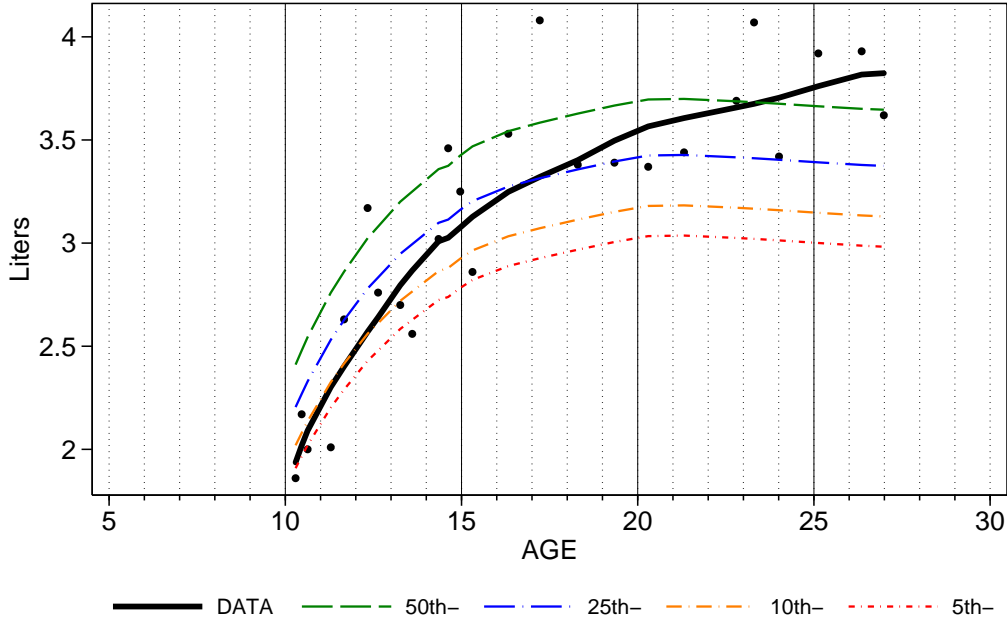

1523

**PATTERN OF GROWTH/DECLINE (Check One)**

- ( 1) Normal Growth
- ( 2) Normal Growth, Early Decline
- ( 3) Reduced Growth
- ( 4) Reduced Growth, Early Decline
- ( 9) Undetermined Pattern
- ( 8) Undetermined - not enough data

Maximum lung growth attained: ( 1) Yes ( 0) No

Plateau started: ( 2) No plateau ( 1) Yes ( 0) No

Decline started: ( 1) Yes ( 0) No

AGE AT each of the following periods (use '99' if N/A):

Maximum Lung Growth: \_\_\_\_ . \_\_\_\_

Start of Plateau: \_\_\_\_ . \_\_\_\_

Start of Decline: \_\_\_\_ . \_\_\_\_

### Pre-BD FEV1 Data and Percentiles: 1525

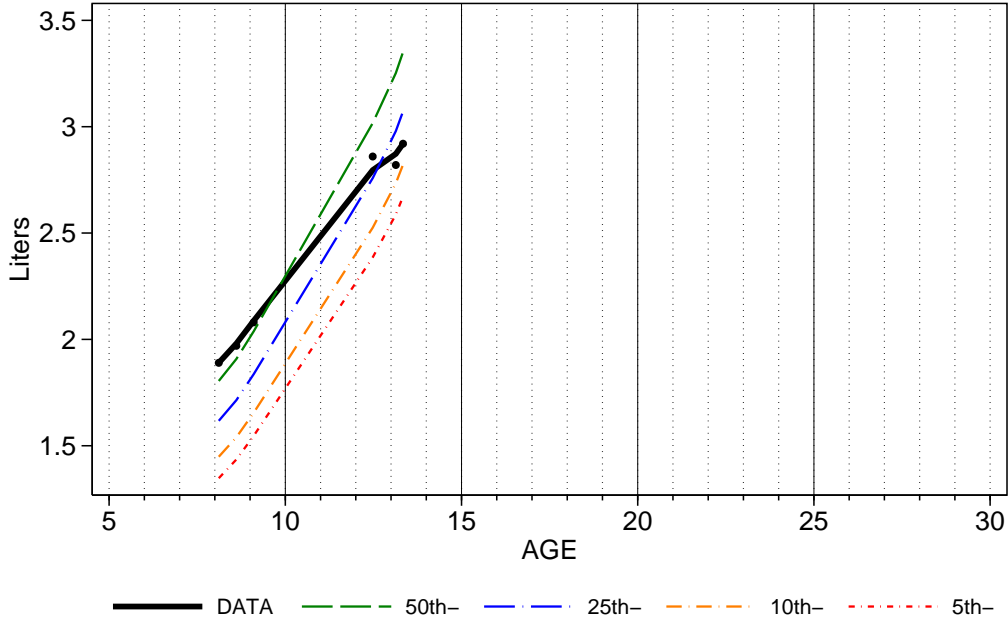

1525

**PATTERN OF GROWTH/DECLINE (Check One)**

- ( 1 ) Normal Growth
- ( 2 ) Normal Growth, Early Decline
- ( 3 ) Reduced Growth
- ( 4 ) Reduced Growth, Early Decline
- ( 9 ) Undetermined Pattern
- ( 8 ) Undetermined - not enough data

Maximum lung growth attained: ( 1 ) Yes ( 0 ) No

Plateau started: ( 2 ) No plateau ( 1 ) Yes ( 0 ) No

Decline started: ( 1 ) Yes ( 0 ) No

AGE AT each of the following periods (use '99' if N/A):

Maximum Lung Growth: \_\_\_\_ . \_\_\_\_

Start of Plateau: \_\_\_\_ . \_\_\_\_

Start of Decline: \_\_\_\_ . \_\_\_\_

### Pre-BD FEV1 Data and Percentiles: 1564

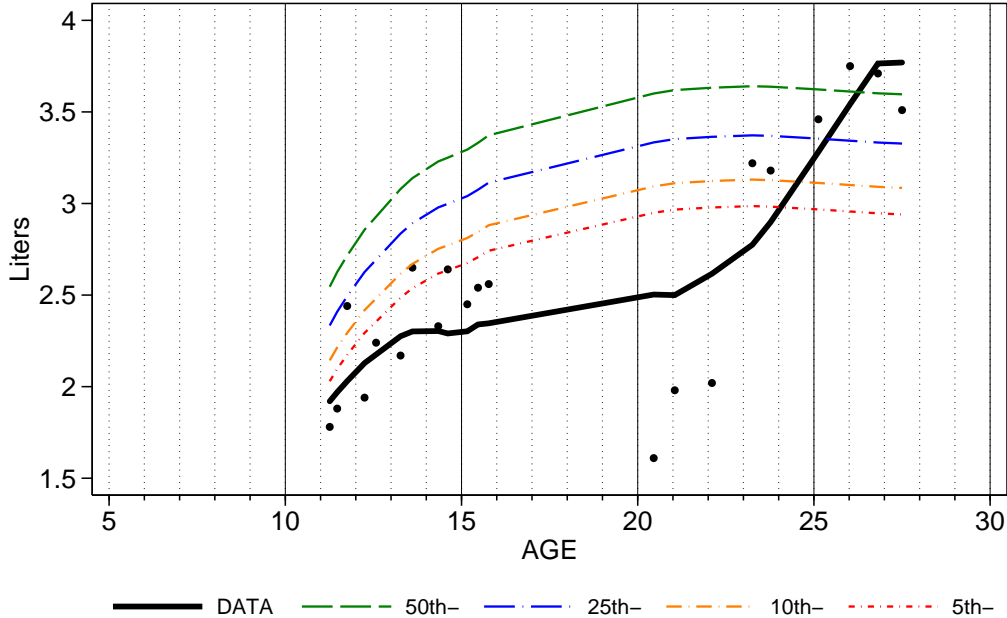

1564

**PATTERN OF GROWTH/DECLINE (Check One)**

- ( 1) Normal Growth
- ( 2) Normal Growth, Early Decline
- ( 3) Reduced Growth
- ( 4) Reduced Growth, Early Decline
- ( 9) Undetermined Pattern
- ( 8) Undetermined - not enough data

Maximum lung growth attained: ( 1) Yes ( 0) No

Plateau started: ( 2) No plateau ( 1) Yes ( 0) No

Decline started: ( 1) Yes ( 0) No

AGE AT each of the following periods (use '99' if N/A):

Maximum Lung Growth: \_\_\_\_ . \_\_\_\_

Start of Plateau: \_\_\_\_ . \_\_\_\_

Start of Decline: \_\_\_\_ . \_\_\_\_

### Pre-BD FEV1 Data and Percentiles: 1636

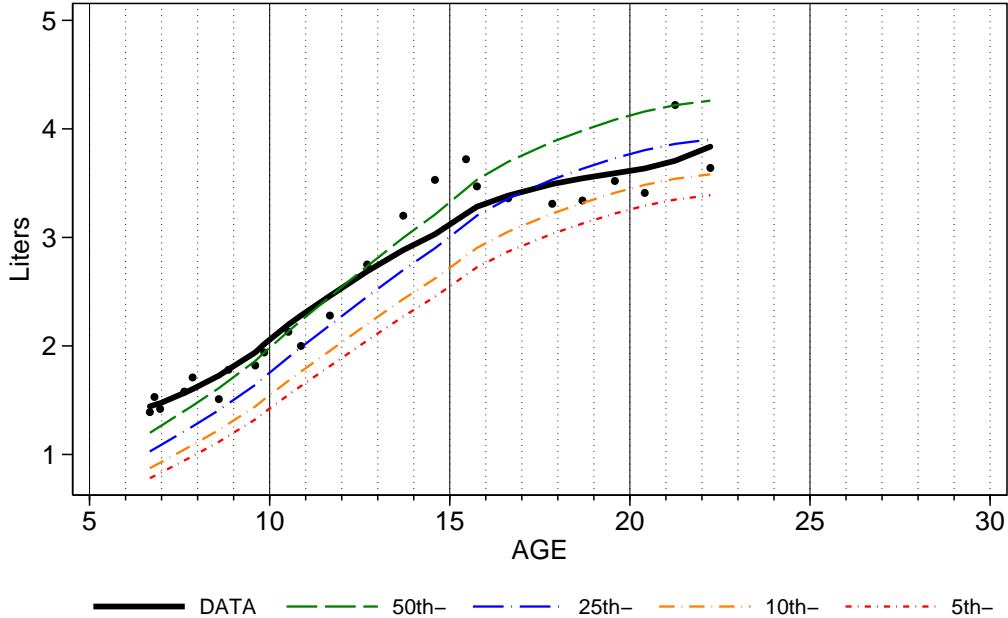

1636

**PATTERN OF GROWTH/DECLINE (Check One)**

- ( 1) Normal Growth
- ( 2) Normal Growth, Early Decline
- ( 3) Reduced Growth
- ( 4) Reduced Growth, Early Decline
- ( 9) Undetermined Pattern
- ( 8) Undetermined - not enough data

Maximum lung growth attained: ( 1) Yes ( 0) No

Plateau started: ( 2) No plateau ( 1) Yes ( 0) No

Decline started: ( 1) Yes ( 0) No

AGE AT each of the following periods (use '99' if N/A):

Maximum Lung Growth: \_\_\_\_ . \_\_\_\_

Start of Plateau: \_\_\_\_ . \_\_\_\_

Start of Decline: \_\_\_\_ . \_\_\_\_

### Pre-BD FEV1 Data and Percentiles: 1649

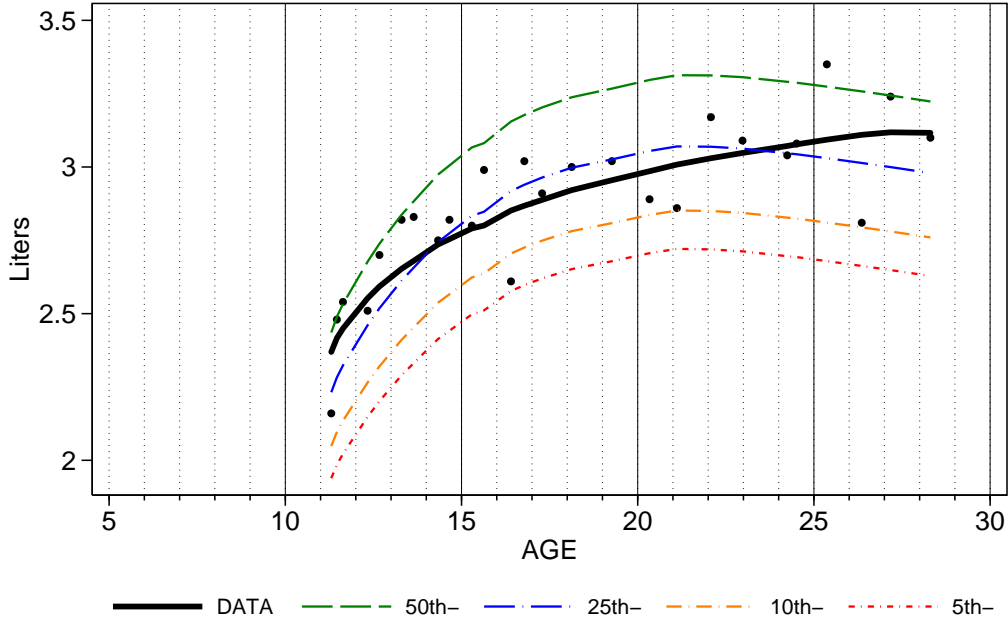

1649

**PATTERN OF GROWTH/DECLINE (Check One)**

- ( 1) Normal Growth
- ( 2) Normal Growth, Early Decline
- ( 3) Reduced Growth
- ( 4) Reduced Growth, Early Decline
- ( 9) Undetermined Pattern
- ( 8) Undetermined - not enough data

Maximum lung growth attained: ( 1) Yes ( 0) No

Plateau started: ( 2) No plateau ( 1) Yes ( 0) No

Decline started: ( 1) Yes ( 0) No

AGE AT each of the following periods (use '99' if N/A):

Maximum Lung Growth: \_\_\_\_ . \_\_\_\_

Start of Plateau: \_\_\_\_ . \_\_\_\_

Start of Decline: \_\_\_\_ . \_\_\_\_

### Pre-BD FEV1 Data and Percentiles: 1659

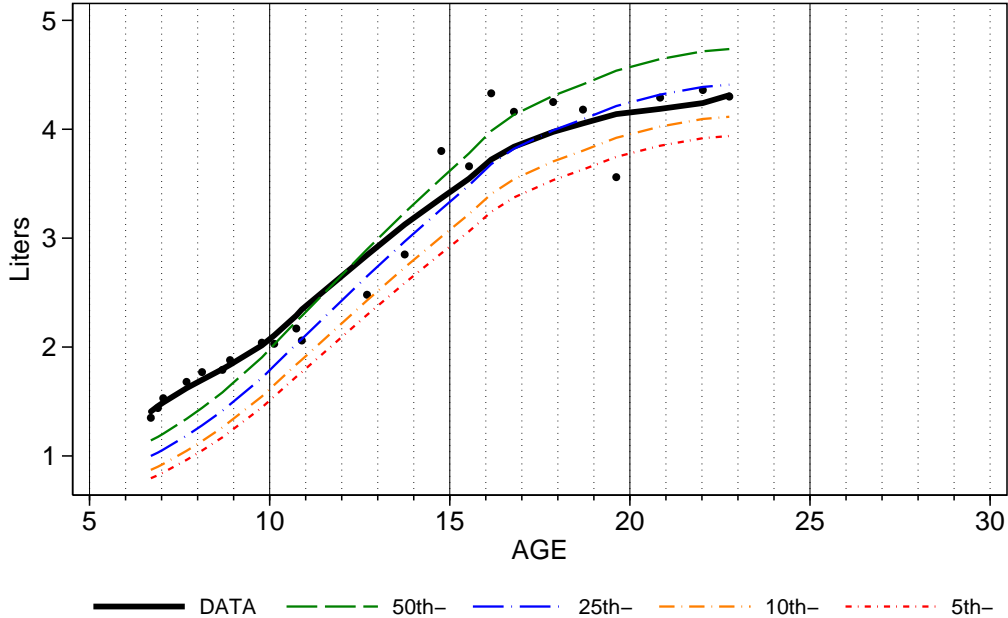

1659

**PATTERN OF GROWTH/DECLINE (Check One)**

- ( 1) Normal Growth
- ( 2) Normal Growth, Early Decline
- ( 3) Reduced Growth
- ( 4) Reduced Growth, Early Decline
- ( 9) Undetermined Pattern
- ( 8) Undetermined - not enough data

Maximum lung growth attained: ( 1) Yes ( 0) No

Plateau started: ( 2) No plateau ( 1) Yes ( 0) No

Decline started: ( 1) Yes ( 0) No

AGE AT each of the following periods (use '99' if N/A):

Maximum Lung Growth: \_\_\_\_ . \_\_\_\_

Start of Plateau: \_\_\_\_ . \_\_\_\_

Start of Decline: \_\_\_\_ . \_\_\_\_



### Pre-BD FEV1 Data and Percentiles: 1661

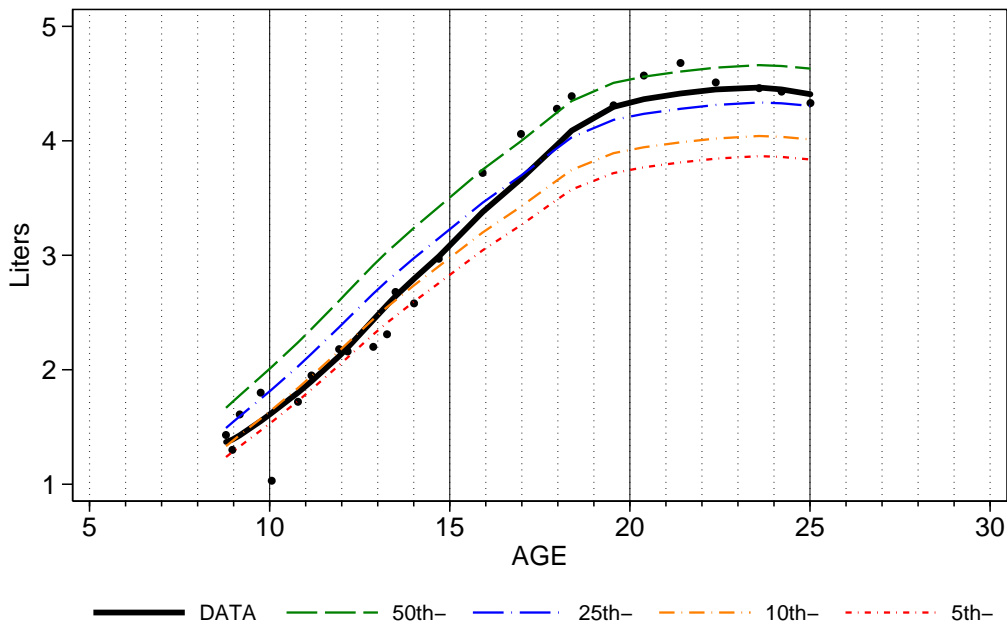

1661

**PATTERN OF GROWTH/DECLINE (Check One)**

- ( 1) Normal Growth
- ( 2) Normal Growth, Early Decline
- ( 3) Reduced Growth
- ( 4) Reduced Growth, Early Decline
- ( 9) Undetermined Pattern
- ( 8) Undetermined - not enough data

Maximum lung growth attained: ( 1) Yes ( 0) No

Plateau started: ( 2) No plateau ( 1) Yes ( 0) No

Decline started: ( 1) Yes ( 0) No

AGE AT each of the following periods (use '99' if N/A):

Maximum Lung Growth: \_\_\_\_ . \_\_\_\_

Start of Plateau: \_\_\_\_ . \_\_\_\_

Start of Decline: \_\_\_\_ . \_\_\_\_

### Pre-BD FEV1 Data and Percentiles: 1680

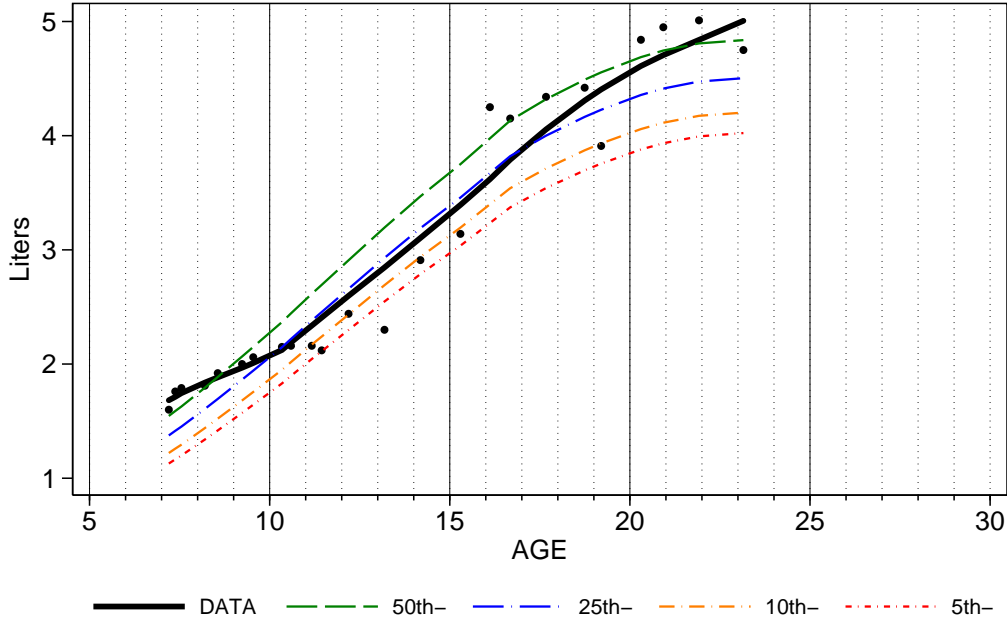

1680

**PATTERN OF GROWTH/DECLINE (Check One)**

- ( 1) Normal Growth
- ( 2) Normal Growth, Early Decline
- ( 3) Reduced Growth
- ( 4) Reduced Growth, Early Decline
- ( 9) Undetermined Pattern
- ( 8) Undetermined - not enough data

Maximum lung growth attained: ( 1) Yes ( 0) No

Plateau started: ( 2) No plateau ( 1) Yes ( 0) No

Decline started: ( 1) Yes ( 0) No

AGE AT each of the following periods (use '99' if N/A):

Maximum Lung Growth: \_\_\_\_ . \_\_\_\_

Start of Plateau: \_\_\_\_ . \_\_\_\_

Start of Decline: \_\_\_\_ . \_\_\_\_

### Pre-BD FEV1 Data and Percentiles: 1683

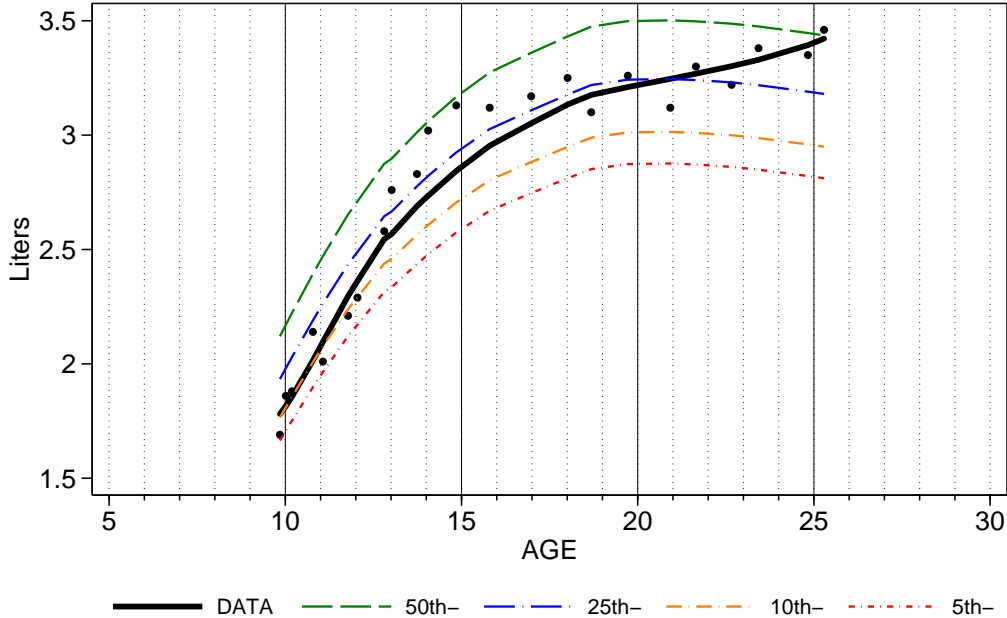

1683

**PATTERN OF GROWTH/DECLINE (Check One)**

- ( 1) Normal Growth
- ( 2) Normal Growth, Early Decline
- ( 3) Reduced Growth
- ( 4) Reduced Growth, Early Decline
- ( 9) Undetermined Pattern
- ( 8) Undetermined - not enough data

Maximum lung growth attained: ( 1) Yes ( 0) No

Plateau started: ( 2) No plateau ( 1) Yes ( 0) No

Decline started: ( 1) Yes ( 0) No

AGE AT each of the following periods (use '99' if N/A):

Maximum Lung Growth: \_\_\_\_ . \_\_\_\_

Start of Plateau: \_\_\_\_ . \_\_\_\_

Start of Decline: \_\_\_\_ . \_\_\_\_

### Pre-BD FEV1 Data and Percentiles: 1688

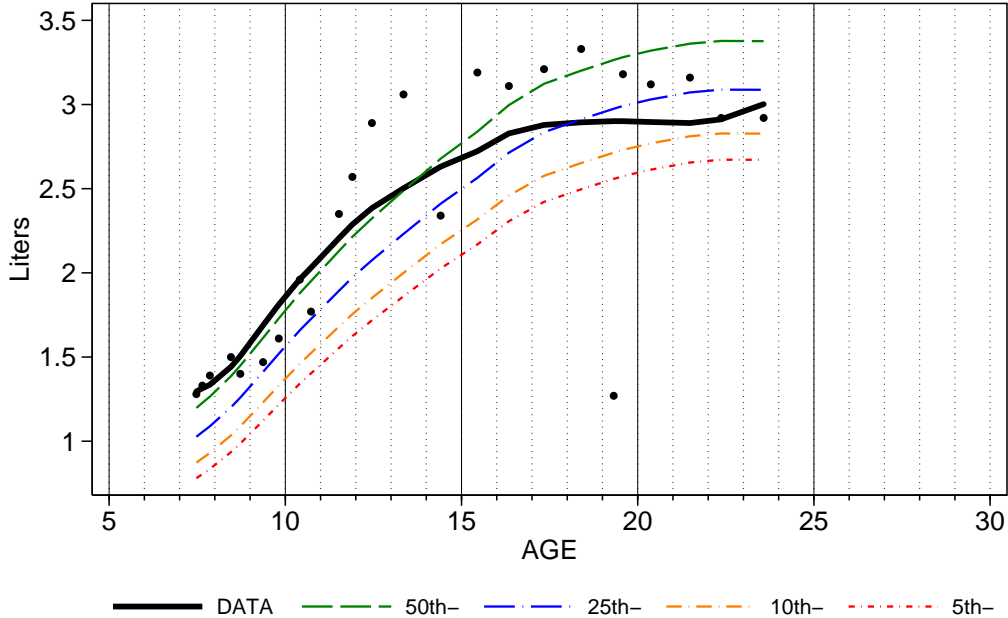

1688

**PATTERN OF GROWTH/DECLINE (Check One)**

- ( 1) Normal Growth
- ( 2) Normal Growth, Early Decline
- ( 3) Reduced Growth
- ( 4) Reduced Growth, Early Decline
- ( 9) Undetermined Pattern
- ( 8) Undetermined - not enough data

Maximum lung growth attained: ( 1) Yes ( 0) No

Plateau started: ( 2) No plateau ( 1) Yes ( 0) No

Decline started: ( 1) Yes ( 0) No

AGE AT each of the following periods (use '99' if N/A):

Maximum Lung Growth: \_\_\_\_ . \_\_\_\_

Start of Plateau: \_\_\_\_ . \_\_\_\_

Start of Decline: \_\_\_\_ . \_\_\_\_

### Pre-BD FEV1 Data and Percentiles: 1718

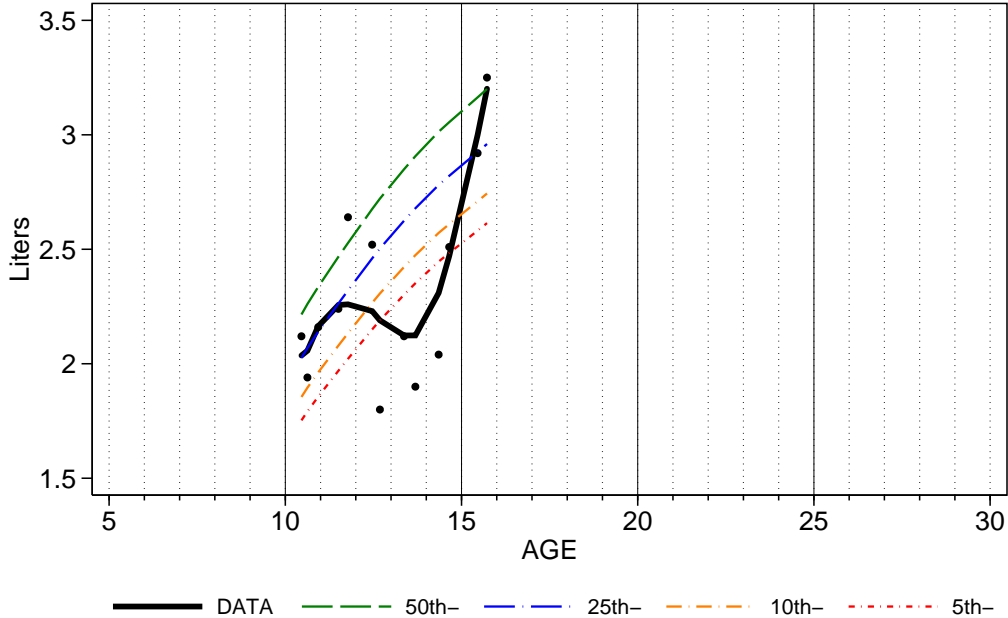

1718

**PATTERN OF GROWTH/DECLINE (Check One)**

- ( 1) Normal Growth
- ( 2) Normal Growth, Early Decline
- ( 3) Reduced Growth
- ( 4) Reduced Growth, Early Decline
- ( 9) Undetermined Pattern
- ( 8) Undetermined - not enough data

Maximum lung growth attained: ( 1) Yes ( 0) No

Plateau started: ( 2) No plateau ( 1) Yes ( 0) No

Decline started: ( 1) Yes ( 0) No

AGE AT each of the following periods (use '99' if N/A):

Maximum Lung Growth: \_\_\_\_ . \_\_\_\_

Start of Plateau: \_\_\_\_ . \_\_\_\_

Start of Decline: \_\_\_\_ . \_\_\_\_

### Pre-BD FEV1 Data and Percentiles: 1739

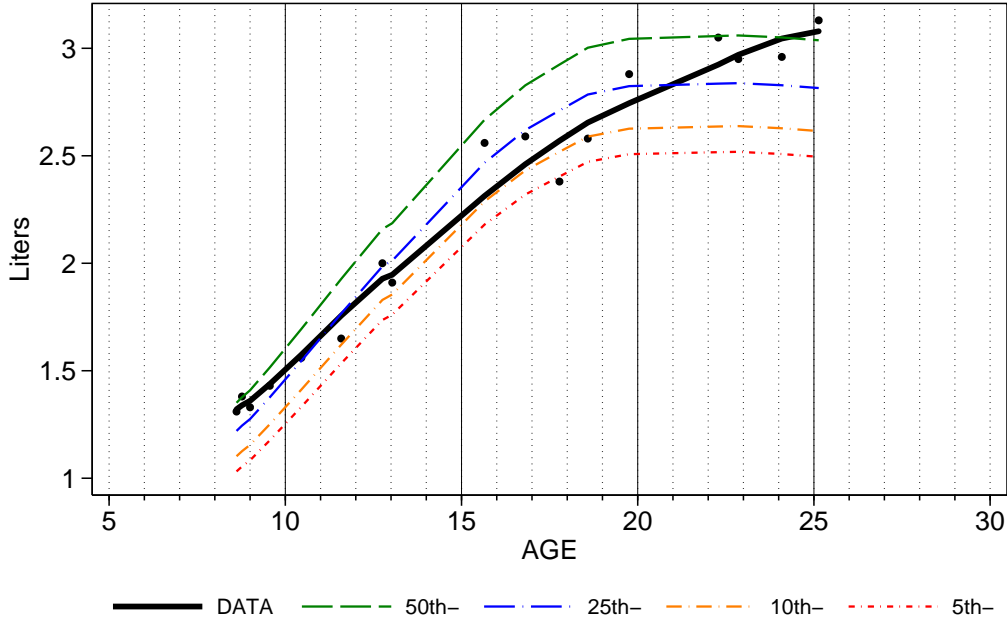

1739

**PATTERN OF GROWTH/DECLINE (Check One)**

- ( 1 ) Normal Growth
- ( 2 ) Normal Growth, Early Decline
- ( 3 ) Reduced Growth
- ( 4 ) Reduced Growth, Early Decline
- ( 9 ) Undetermined Pattern
- ( 8 ) Undetermined - not enough data

Maximum lung growth attained: ( 1 ) Yes ( 0 ) No

Plateau started: ( 2 ) No plateau ( 1 ) Yes ( 0 ) No

Decline started: ( 1 ) Yes ( 0 ) No

AGE AT each of the following periods (use '99' if N/A):

Maximum Lung Growth: \_\_\_\_ . \_\_\_\_

Start of Plateau: \_\_\_\_ . \_\_\_\_

Start of Decline: \_\_\_\_ . \_\_\_\_

### Pre-BD FEV1 Data and Percentiles: 1745

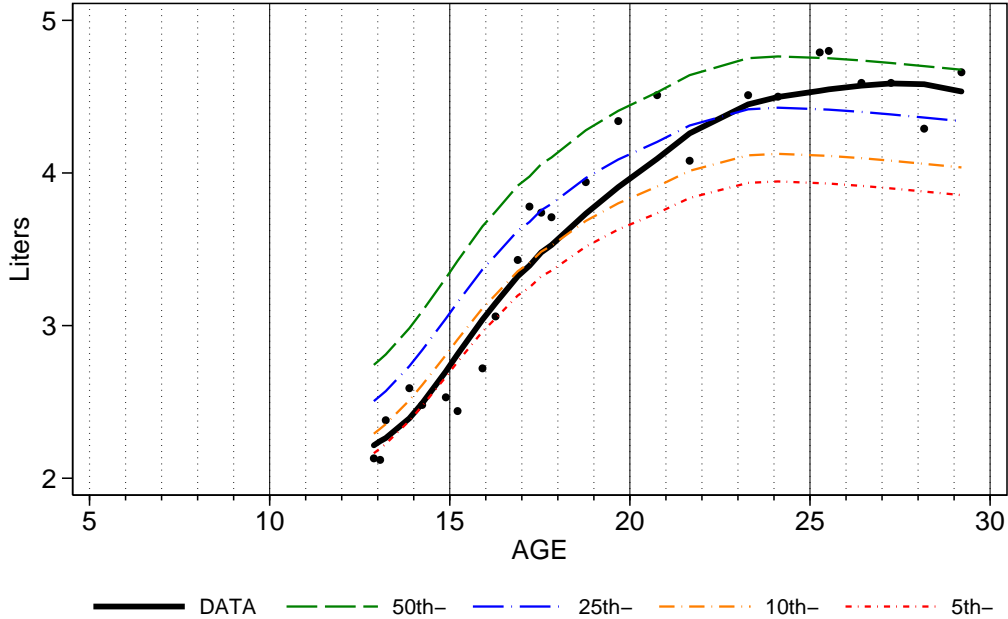

1745

**PATTERN OF GROWTH/DECLINE (Check One)**

- ( 1) Normal Growth
- ( 2) Normal Growth, Early Decline
- ( 3) Reduced Growth
- ( 4) Reduced Growth, Early Decline
- ( 9) Undetermined Pattern
- ( 8) Undetermined - not enough data

Maximum lung growth attained: ( 1) Yes ( 0) No

Plateau started: ( 2) No plateau ( 1) Yes ( 0) No

Decline started: ( 1) Yes ( 0) No

AGE AT each of the following periods (use '99' if N/A):

Maximum Lung Growth: \_\_\_\_ . \_\_\_\_

Start of Plateau: \_\_\_\_ . \_\_\_\_

Start of Decline: \_\_\_\_ . \_\_\_\_

### Pre-BD FEV1 Data and Percentiles: 1789

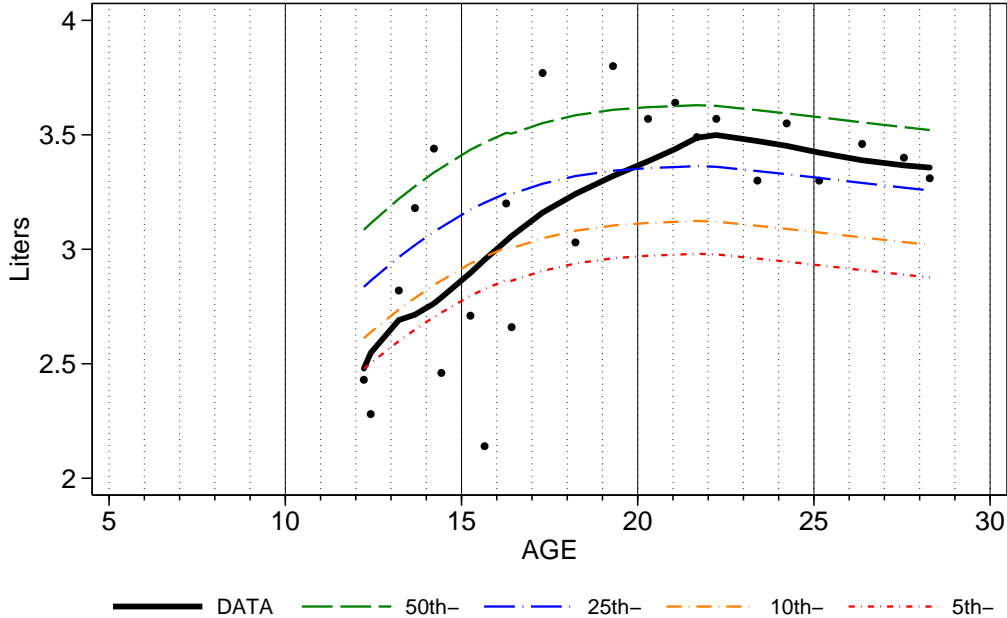

1789

**PATTERN OF GROWTH/DECLINE (Check One)**

- ( 1) Normal Growth
- ( 2) Normal Growth, Early Decline
- ( 3) Reduced Growth
- ( 4) Reduced Growth, Early Decline
- ( 9) Undetermined Pattern
- ( 8) Undetermined - not enough data

Maximum lung growth attained: ( 1) Yes ( 0) No

Plateau started: ( 2) No plateau ( 1) Yes ( 0) No

Decline started: ( 1) Yes ( 0) No

AGE AT each of the following periods (use '99' if N/A):

Maximum Lung Growth: \_\_\_\_ . \_\_\_\_

Start of Plateau: \_\_\_\_ . \_\_\_\_

Start of Decline: \_\_\_\_ . \_\_\_\_



### Pre-BD FEV1 Data and Percentiles: 1900

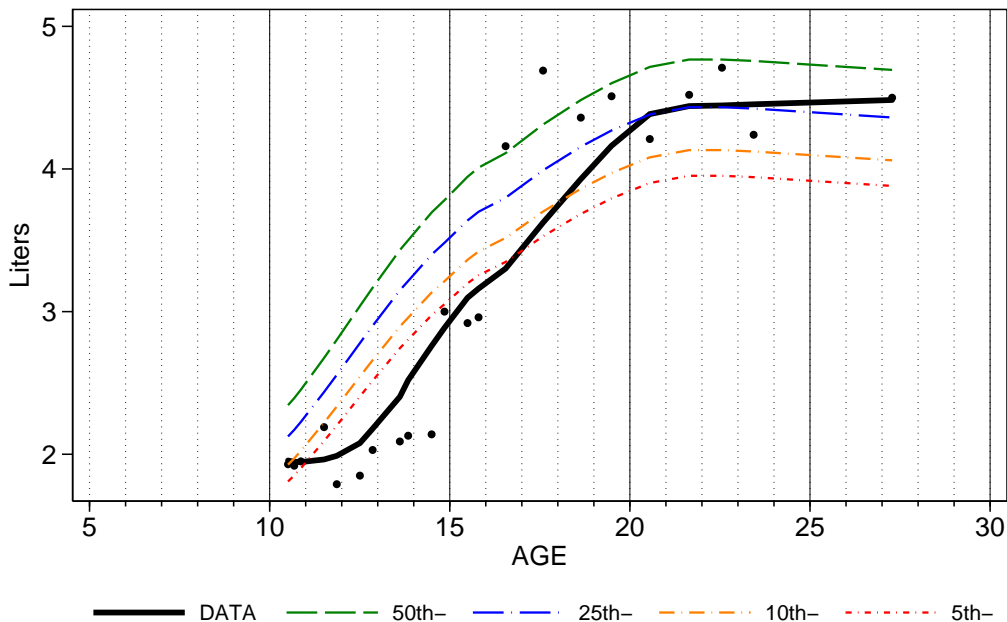

1900

**PATTERN OF GROWTH/DECLINE (Check One)**

- ( 1 ) Normal Growth
- ( 2 ) Normal Growth, Early Decline
- ( 3 ) Reduced Growth
- ( 4 ) Reduced Growth, Early Decline
- ( 9 ) Undetermined Pattern
- ( 8 ) Undetermined - not enough data

Maximum lung growth attained: ( 1 ) Yes ( 0 ) No

Plateau started: ( 2 ) No plateau ( 1 ) Yes ( 0 ) No

Decline started: ( 1 ) Yes ( 0 ) No

AGE AT each of the following periods (use '99' if N/A):

Maximum Lung Growth: \_\_\_\_ . \_\_\_\_

Start of Plateau: \_\_\_\_ . \_\_\_\_

Start of Decline: \_\_\_\_ . \_\_\_\_

### Pre-BD FEV1 Data and Percentiles: 2014

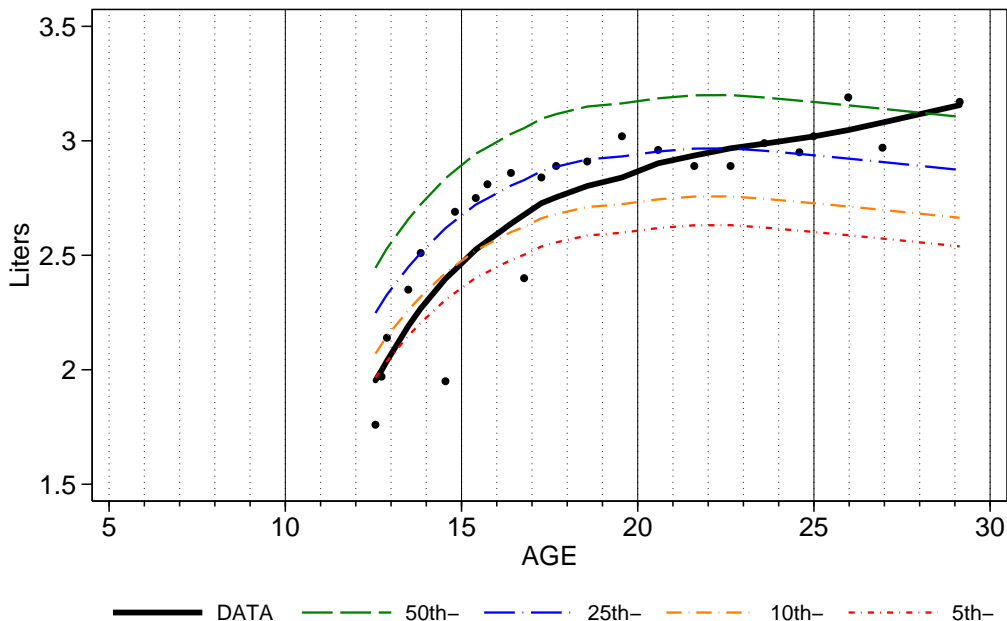

2014

**PATTERN OF GROWTH/DECLINE (Check One)**

- ( 1 ) Normal Growth
- ( 2 ) Normal Growth, Early Decline
- ( 3 ) Reduced Growth
- ( 4 ) Reduced Growth, Early Decline
- ( 9 ) Undetermined Pattern
- ( 8 ) Undetermined - not enough data

Maximum lung growth attained: ( 1 ) Yes ( 0 ) No

Plateau started: ( 2 ) No plateau ( 1 ) Yes ( 0 ) No

Decline started: ( 1 ) Yes ( 0 ) No

AGE AT each of the following periods (use '99' if N/A):

Maximum Lung Growth: \_\_\_\_ . \_\_\_\_

Start of Plateau: \_\_\_\_ . \_\_\_\_

Start of Decline: \_\_\_\_ . \_\_\_\_

### Pre-BD FEV1 Data and Percentiles: 2017

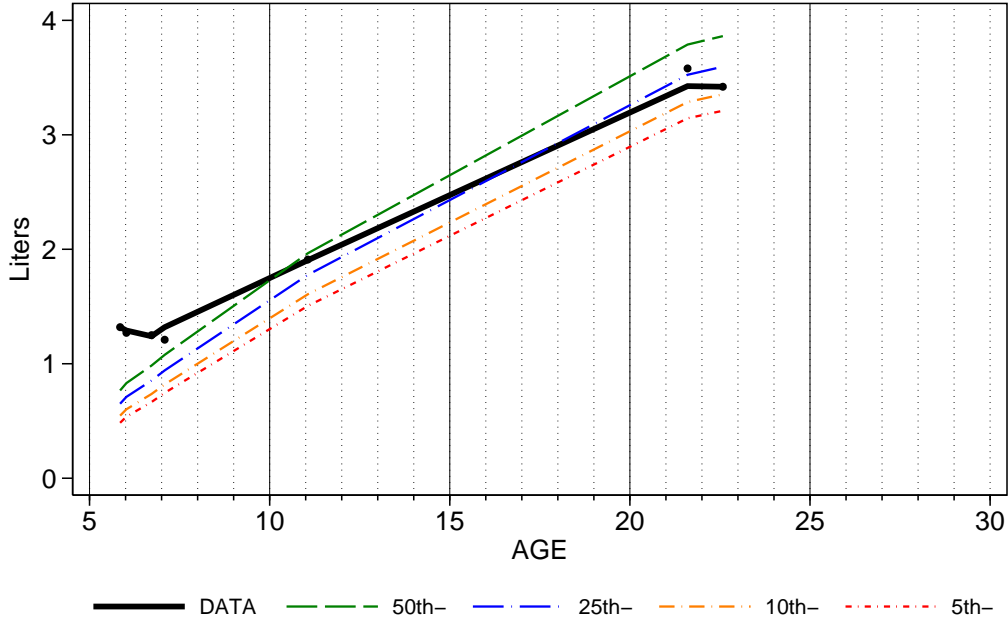

2017

**PATTERN OF GROWTH/DECLINE (Check One)**

- ( 1) Normal Growth
- ( 2) Normal Growth, Early Decline
- ( 3) Reduced Growth
- ( 4) Reduced Growth, Early Decline
- ( 9) Undetermined Pattern
- ( 8) Undetermined - not enough data

Maximum lung growth attained: ( 1) Yes ( 0) No

Plateau started: ( 2) No plateau ( 1) Yes ( 0) No

Decline started: ( 1) Yes ( 0) No

AGE AT each of the following periods (use '99' if N/A):

Maximum Lung Growth: \_\_\_\_ . \_\_\_\_

Start of Plateau: \_\_\_\_ . \_\_\_\_

Start of Decline: \_\_\_\_ . \_\_\_\_
