# Supplementary material
Source: PubMed Central journal article supplement (PMC5032024)
Supplement: NIHMS802613-supplement-app3.pdf [file NIHMS802613-supplement-app3.pdf]

## Supplementary Appendix 3

This appendix has been provided by the authors to give readers additional information about their work.

Supplement to: McGeachie MJ, Yates KP, Zhou X, et al. Patterns of growth and decline in lung function in persistent childhood asthma. *N Engl J Med* 2016;374:1842-52. DOI: [10.1056/NEJMoa1513737](https://doi.org/10.1056/NEJMoa1513737)

NEJM24Sep15\_pdflinkage data file: use to link to the Patterns PDF and to generate curves (26SEP

Note: NHANES III values are adjusted by sex-race/ethnicity-age-height of patient

N = 22,086 spirometry measures on 1,041 unique patients participating in CAMP

The CONTENTS Procedure

#### Variables in Creation Order

| #  | Variable | Type | Len | Format | Label                                                                                                                                               |
|----|----------|------|-----|--------|-----------------------------------------------------------------------------------------------------------------------------------------------------|
| 1  | pattern  | Num  | 3   |        | Pattern code:1=NG 2=NG/ED 3=RG 4=RG/ED 8=Undetermined, sparse data 9=Undetermined pattern                                                           |
| 2  | NEWCAMP  | Num  | 4   |        | Random patient ID for linkage to Patterns PDF & NHLBI BioLINCC Repository data files                                                                |
| 3  | analyzed | Num  | 3   |        | Patient included in the 684 data analyses (patient has a high-confidence pattern determination with at least 1 spirometry at age 23+ yr):0=no 1=yes |
| 4  | maxreach | Num  | 3   |        | Maximum lung growth attained: 0=no 1=yes                                                                                                            |
| 5  | agemax   | Num  | 8   |        | Age that maximum lung growth was reached, in years, .=did not reach maximum                                                                         |
| 6  | plateau  | Num  | 3   |        | Plateau phase was started: 0=not begun, 1=yes, 2=no plateau, a decline was immediately began                                                        |
| 7  | ageplat  | Num  | 8   |        | Age at the start of the plateau phase, in years, .=did not begin a plateau                                                                          |
| 8  | decline  | Num  | 3   |        | Decline of lung function earlier than expected by NHANES III was begun: 0=no 1=yes                                                                  |
| 9  | agedecln | Num  | 8   |        | Age at the start of the decline, in years, .=did not begin a decline in lung function                                                               |
| 10 | visit    | Char | 3   |        | Visit code of spirometry measurement                                                                                                                |
| 11 | age      | Num  | 8   | D5.2   | Age of patient at spirometry                                                                                                                        |
| 12 | prefev   | Num  | 8   | D5.2   | Pre-bronchodilator FEV1 measurement (in Liters)                                                                                                     |
| 13 | fev_50p  | Num  | 8   | D5.2   | Expected FEV1 (in liters) based on NHANES III 50th percentile                                                                                       |
| 14 | fev_25p  | Num  | 8   | D5.2   | FEV1 value (in liters) based on NHANES III 25th percentile                                                                                          |
| 15 | fev_10p  | Num  | 8   | D5.2   | FEV1 value (in liters) based on NHANES III 10th percentile                                                                                          |
| 16 | fev_5p   | Num  | 8   | D5.2   | FEV1 value (in liters) based on NHANES III 5th percentile (LLN)                                                                                     |

#### Sort Information

Sortedby pattern NEWCAMP age  
 Validated YES  
 Character Set ANSI
